# Supplementary material for: Mn(I)-catalyzed sigmatropic rearrangement of β, γ-unsaturated alcohols
Source: Springer Nature journal article supplement (doi:10.1038/s41467-023-37299-x), 2023-04-03
Supplement: MOESM1 [file 41467_2023_37299_MOESM1_ESM.pdf]

## Supplementary Information

### Mn(I)-Catalyzed Sigmatropic Rearrangement of $\beta$ , $\gamma$ -Unsaturated Alcohols

Can Yang<sup>1</sup>, Xiaoyu Zhou<sup>2</sup>, Lixing Shen<sup>1</sup>, Zhuofeng Ke<sup>2\*</sup>, Huanfeng Jiang<sup>1</sup>, and Wei Zeng<sup>1\*</sup>

<sup>1</sup> Key Laboratory of Functional Molecular Engineering of Guangdong Province, School of Chemistry and Chemical Engineering, South China University of Technology, Guangzhou 510641, China

<sup>2</sup> School of Materials Science and Engineering, PFCM Lab, Sun Yat-sen University, Guangzhou 510275, China

\*Corresponding author. Email: kezhf3@mail.sysu.edu.cn (Z. K.); zengwei@scut.edu.cn (W. Z.)

|                                                                                                     |            |
|-----------------------------------------------------------------------------------------------------|------------|
| <b>I. Supplementary Methods .....</b>                                                               | <b>2</b>   |
| 1.1. General experimental information .....                                                         | 2          |
| 1.2. Experimental procedures for the preparation of starting materials .....                        | 3          |
| 1.3. Optimization of reaction conditions .....                                                      | 20         |
| 1.4. Detail characterization for the sigmatropic rearrangement products <b>3</b> and <b>5</b> ..... | 21         |
| 1.5. Detail characterization for the sigmatropic rearrangement products <b>7</b> .....              | 29         |
| 1.6. Post-synthetic applications of the <b>3a</b> , <b>3q</b> and <b>7a</b> .....                   | 35         |
| 1.7. Control experiments for the mechanism studies .....                                            | 38         |
| 1.8. Single crystal structure and data.....                                                         | 41         |
| 1.9. Computational detail .....                                                                     | 44         |
| <b>II. <sup>1</sup>H NMR and <sup>13</sup>C NMR Spectrum of All Products. ....</b>                  | <b>50</b>  |
| <b>III. HR-MS Spectrum of the New Products.....</b>                                                 | <b>189</b> |
| <b>IV. Supplementary References .....</b>                                                           | <b>288</b> |

## I. Supplementary Methods

### 1.1. General experimental information

All reactions were carried out in flame-dried sealed tubes with magnetic stirring. Unless otherwise noted, all experiments were performed under argon atmosphere. Reagents were purchased from Accela, Acros, Aladdin, Adamas, Energy Chemical or TCI. All solvents were treated with 4 Å molecular sieves or sodium and distilled prior to use. Purifications of reaction products were carried out by flash chromatography using the silica gel (300-400 mesh) from Qingdao Haiyang Chemical Co. Ltd. Infrared spectra (IR) were recorded on a Bruker TENSOR 27 FTIR spectrophotometer and are reported as wavelength numbers ( $\text{cm}^{-1}$ ). Infrared spectra were recorded by preparing a KBr pellet containing the title compounds.  $^1\text{H}$  NMR and  $^{13}\text{C}$  NMR spectra were recorded with tetramethylsilane (TMS) as internal standard at ambient temperature on a Bruker Avance III 400 MHz or 500 MHz for  $^1\text{H}$  NMR and 100 MHz or 126 MHz for  $^{13}\text{C}$  NMR. Chemical shifts are reported in parts per million (ppm) and coupling constants are reported as Hertz (Hz). Splitting patterns are designated as singlet (s), doublet (d), triplet (t), doublet of doublet (dd), quartet (q). Splitting patterns that could not be interpreted or easily visualized are designated as multiple (m). High resolution mass spectra (HRMS) were recorded on an IF-TOF spectrometer (Micromass).



## 1.2. Experimental procedures for the preparation of starting materials

### General procedure for the synthesis of alcohols

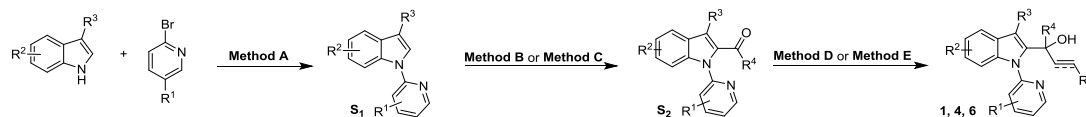

#### Method A:

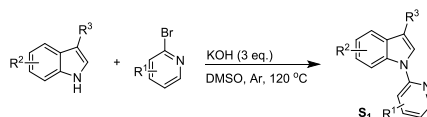

**Synthetic procedure of substituted *N*-pyridyl indoles **S1****<sup>[1]</sup>: A pressure tube was charged with the corresponding indoles (10 mmol), KOH (3.0 eq.), 2-bromopyridines (2.0 eq.), and DMSO (10.0 mL) under Ar atmosphere. The resulting mixture was stirred in an oil bath at 120 °C until the end of the reaction. The mixture was quenched with a saturated solution of NH<sub>4</sub>Cl and extracted with ethyl acetate. The organic phase was dried over MgSO<sub>4</sub>, followed by evaporation under reduced pressure to remove the solvent. The product was purified by column chromatography on silica gel (petroleum ether /ethyl acetate = 100: 1 - 50: 1) to afford the corresponding indoles **S1**.

**1-(5-Chloropyridin-2-yl)-3-methyl-1H-indole (**S1-1**)**: white solid; m.p. 44.1 – 46.2 °C; 1.33 g, 55% yield; <sup>1</sup>H NMR (500 MHz, CDCl<sub>3</sub>) δ 8.46 (d, *J* = 2.3 Hz, 1H), 8.18 (d, *J* = 8.3 Hz, 1H), 7.71 (dd, *J* = 8.7, 2.5 Hz, 1H), 7.58 (d, *J* = 7.8 Hz, 1H), 7.43 (d, *J* = 0.8 Hz, 1H), 7.35 (d, *J* = 8.7 Hz, 1H), 7.30 (t, *J* = 7.4 Hz, 1H), 7.23 (d, *J* = 8.0 Hz, 1H), 2.36 (d, *J* = 1.0 Hz, 3H); <sup>13</sup>C NMR (126 MHz, CDCl<sub>3</sub>) δ 150.9, 147.4, 138.0, 135.3, 131.2, 126.7, 123.5, 122.9, 121.2, 119.2, 115.5, 114.5, 113.2, 9.7; HR-MS [ESI-MS(+)] calcd for [M + H]<sup>+</sup>: C<sub>14</sub>H<sub>12</sub>ClN<sub>2</sub>: 243.0684, found: 243.0681; IR (KBr): 3048, 1578, 1473, 1449, 1395, 1349, 1214, 1111, 918, 741 cm<sup>-1</sup>.

**3-Methyl-1-(5-(trifluoromethyl)pyridin-2-yl)-1H-indole (**S1-2**)**: light yellow solid; m.p. 58.3 – 59.6 °C; 2.15 g, 78% yield; <sup>1</sup>H NMR (400 MHz, CDCl<sub>3</sub>) δ 8.81 (dd, *J* = 1.5, 0.8 Hz, 1H), 8.45 – 8.40 (m, 1H), 7.97 – 7.90 (m, 1H), 7.64 (d, *J* = 7.7 Hz, 1H), 7.50 (s, 1H), 7.41 (dd, *J* = 17.2, 8.8 Hz, 2H), 7.32 (t, *J* = 7.4 Hz, 1H), 2.41 (d, *J* = 1.2 Hz, 3H); <sup>13</sup>C NMR (101 MHz, CDCl<sub>3</sub>) δ 154.8, 146.1 (q, *J* = 4.6 Hz, <sup>3</sup>*J*<sub>CF</sub>), 135.5, 135.4 (q, *J* = 3.6 Hz, <sup>3</sup>*J*<sub>CF</sub>), 131.6, 123.9, 123.4 (d, *J* = 338.4 Hz, <sup>1</sup>*J*<sub>CF</sub>), 122.4, 121.8, 121.3, 119.2, 116.7, 114.3, 112.2, 9.7; HR-MS [ESI-MS(+)] calcd for [M + H]<sup>+</sup>: C<sub>15</sub>H<sub>12</sub>F<sub>3</sub>N<sub>2</sub>: 277.0947, found: 277.0941; IR (KBr): 2922, 1738, 1604, 1497, 1454, 1403, 1324, 1120, 1079, 1014, 742 cm<sup>-1</sup>.

**1-(Pyridin-2-yl)-6-(trifluoromethyl)-1H-indole (**S1-3**)**: light yellow solid; m.p. 114.2 – 115.7 °C; 1.97 g, 75% yield; <sup>1</sup>H NMR (400 MHz, CDCl<sub>3</sub>) δ 8.63 (d, *J* = 4.9 Hz, 2H), 7.90 – 7.86 (m, 1H), 7.83 (d, *J* = 3.5 Hz, 1H), 7.76 (d, *J* = 8.3 Hz, 1H), 7.48 (d, *J* = 8.3 Hz, 2H), 7.25 (dd, *J* = 7.3, 4.9 Hz, 1H), 6.79 (d, *J* = 3.4 Hz, 1H); <sup>13</sup>C NMR (101 MHz, CDCl<sub>3</sub>) δ 152.1, 149.1, 138.7, 134.2, 132.7, 128.3, 125.2 (d, *J* = 272.7 Hz, <sup>1</sup>*J*<sub>CF</sub>), 125.2 (d, *J* = 32.3 Hz, <sup>2</sup>*J*<sub>CF</sub>), 121.3, 120.7, 118.0 (q, *J* = 4.1 Hz, <sup>3</sup>*J*<sub>CF</sub>), 114.5, 111.1 (q, *J* = 4.6 Hz, <sup>3</sup>*J*<sub>CF</sub>), 105.5; HR-MS [ESI-MS(+)] calcd for [M + H]<sup>+</sup>: C<sub>14</sub>H<sub>10</sub>F<sub>3</sub>N<sub>2</sub>: 263.0791, found: 263.0785; IR (KBr): 2955, 2916, 2849, 1590, 1477, 1452, 1352, 1329, 1213, 1145, 1103, 893, 818, 772, 732 cm<sup>-1</sup>.

#### Method B:

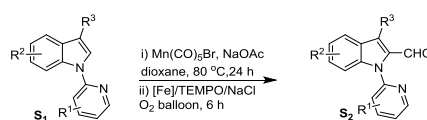

**Synthetic procedure of substituted *N*-pyridyl 2-formylindoles S2:** The following starting materials **S2** were prepared according to the literature procedure<sup>[2]</sup>. To a 100 mL dry Schlenk tube with a stirring bar, Mn(CO)<sub>5</sub>Br (5 mmol %), NaOAc (10 mmol %), (CH<sub>2</sub>O)<sub>n</sub> (3.0 eq.), and *N*-pyridyl indoles **S1** (5 mmol) were added under air. After that, the reaction vessel was then evacuated and filled with argon for three times. Afterwards, dioxane (15 mL, anhydrous) was added sequentially under an argon atmosphere. The tube was sealed and the mixture was stirred at 80 °C for 15 h. After the reaction was cooled down to room temperature, Fe(NO<sub>3</sub>)<sub>3</sub>·9H<sub>2</sub>O (10 mol %), TEMPO (10 mol %), and NaCl (10 mol %) were added into the reaction mixture, and the reaction vessel was then quickly evacuated and filled with oxygen using a balloon. The reaction was run for additional 6 h at room temperature. The reaction mixture was evaporated and purified *via* column chromatography on silica gel (eluent: petroleum ether/ethyl acetate = 10/1) afforded the pure desired products **S2**.

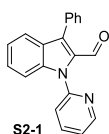

**3-Phenyl-1-(pyridin-2-yl)-1H-indole-2-carbaldehyde (S2-1):** white solid; m.p. 147.3 - 149.5 °C; 983.0 mg, 66% yield; <sup>1</sup>H NMR (400 MHz, CDCl<sub>3</sub>) δ 9.94 (s, 1H), 8.69 (dd, *J* = 4.9, 1.2 Hz, 1H), 7.97 – 7.92 (m, 1H), 7.82 (d, *J* = 8.1 Hz, 1H), 7.70 – 7.65 (m, 2H), 7.60 – 7.55 (m, 2H), 7.54 – 7.42 (m, 5H), 7.30 – 7.36 (m, 1H); <sup>13</sup>C NMR (101 MHz, CDCl<sub>3</sub>) δ 182.4, 151.2, 149.2, 139.8, 138.2, 133.6, 131.6, 131.4, 130.9, 128.7, 128.3, 128.3, 126.7, 123.1, 122.3, 122.3, 122.3, 111.9; HR-MS [ESI-MS(+)] calcd for [M + H]<sup>+</sup>: C<sub>20</sub>H<sub>15</sub>N<sub>2</sub>O: 299.1179, found: 299.1188; IR (KBr): 3054, 2842, 1667, 1587, 1469, 1406, 1379, 1338, 1239, 1180, 1149, 1024, 926, 773, 749, 702 cm<sup>-1</sup>.

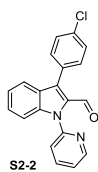

**3-(4-Chlorophenyl)-1-(pyridin-2-yl)-1H-indole-2-carbaldehyde (S2-2):** light yellow oil; 650.0 mg, 39% yield; <sup>1</sup>H NMR (500 MHz, CDCl<sub>3</sub>) δ 9.88 (s, 1H), 8.66 (d, *J* = 3.8 Hz, 1H), 7.95 – 7.91 (m, 1H), 7.74 (d, *J* = 8.2 Hz, 1H), 7.58 (d, *J* = 8.3 Hz, 2H), 7.52 (d, *J* = 8.3 Hz, 2H), 7.46 – 7.39 (m, 4H), 7.28 – 7.25 (m, 1H); <sup>13</sup>C NMR (126 MHz, CDCl<sub>3</sub>) δ 181.9, 151.0, 149.3, 139.6, 138.3, 134.5, 132.1, 131.4, 130.1, 129.0, 128.4, 126.5, 123.2, 122.5, 122.2, 121.9, 111.9; HR-MS [ESI-MS(+)] calcd for [M + H]<sup>+</sup>: C<sub>20</sub>H<sub>14</sub>ClN<sub>2</sub>O: 333.0789, found: 333.0787; IR (KBr): 2924, 1734, 1662, 1585, 1467, 1442, 1379, 1236, 917, 743 cm<sup>-1</sup>.

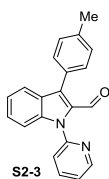

**1-(Pyridin-2-yl)-3-(*p*-tolyl)-1H-indole-2-carbaldehyde (S2-3):** light yellow oil; 730.0 mg, 47% yield; <sup>1</sup>H NMR (400 MHz, CDCl<sub>3</sub>) δ 9.94 (s, 1H), 8.70 – 8.68 (m, 1H), 7.96 – 7.92 (m, 1H), 7.82 (d, *J* = 8.1 Hz, 1H), 7.57 (d, *J* = 8.0 Hz, 2H), 7.48 – 7.37 (m, 6H), 7.29 – 7.25 (m, 1H), 2.50 (s, 3H); <sup>13</sup>C NMR (101 MHz, CDCl<sub>3</sub>) δ 182.4, 151.3, 149.2, 139.8, 138.3, 138.1, 133.8, 131.4, 130.9, 130.8, 129.5, 128.8, 128.6, 128.2, 126.7, 123.0, 122.3, 122.3, 122.2, 111.9, 21.4; HR-MS [ESI-MS(+)] calcd for [M + H]<sup>+</sup>: C<sub>21</sub>H<sub>17</sub>N<sub>2</sub>O: 313.1335, found: 313.1329; IR (KBr): 2931, 1734, 1675, 1663, 1677, 1577, 1466, 1438, 1379, 1350, 1187, 930, 747 cm<sup>-1</sup>.

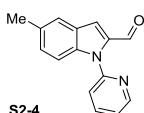

**5-Methyl-1-(pyridin-2-yl)-1H-indole-2-carbaldehyde (S2-4):** yellow solid; m.p. 90.0 – 91.4 °C; 826.0 mg, 70% yield; <sup>1</sup>H NMR (400 MHz, CDCl<sub>3</sub>) δ 9.95 (s, 1H), 8.69 – 8.64 (m, 1H), 7.94 – 7.90 (m, 1H), 7.58 (s, 1H), 7.46 – 7.37 (m, 4H), 7.25 (dd, *J* = 8.7, 1.3 Hz, 1H), 2.48 (s, 3H); <sup>13</sup>C NMR (101 MHz, CDCl<sub>3</sub>) δ 181.6, 150.7, 149.2, 138.7, 138.2, 136.2, 131.7, 129.6, 127.2, 122.6, 121.5, 117.1, 111.7, 21.3; HR-MS [ESI-MS(+)] calcd for [M + H]<sup>+</sup>: C<sub>15</sub>H<sub>13</sub>N<sub>2</sub>O: 237.1022, found: 237.1010; IR (KBr): 2922, 1735, 1700, 1685, 1676, 1587, 1560, 1469, 1439, 1371, 1293, 1118, 989, 915, 774 cm<sup>-1</sup>.

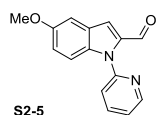

**5-Methoxy-1-(pyridin-2-yl)-1H-indole-2-carbaldehyde (S2-5):** light yellow solid; m.p. 105.9 – 107.1 °C; 504.00 mg, 40% yield; <sup>1</sup>H NMR (400 MHz, CDCl<sub>3</sub>) δ 9.93 (s, 1H), 8.65 (dd, *J* = 4.5, 1.3 Hz, 1H), 7.94 – 7.88 (m, 1H), 7.47 – 7.41 (m, 3H), 7.40 – 7.36 (m, 1H), 7.16 (d, *J* = 2.4 Hz, 1H), 7.08 (dd, *J* = 9.1, 2.5 Hz, 1H), 3.89 (s, 3H); <sup>13</sup>C NMR (101 MHz, CDCl<sub>3</sub>) δ 181.6, 155.6, 150.6, 149.2, 138.3, 136.4, 135.6, 127.4, 122.7, 121.4, 119.2, 116.7, 113.1, 103.0, 55.7; HR-MS [ESI-MS(+)] calcd for [M + H]<sup>+</sup>: C<sub>15</sub>H<sub>13</sub>N<sub>2</sub>O<sub>2</sub>: 253.0972, found: 253.0965; IR (KBr): 2920, 1672, 1587, 1524, 1468, 1437, 1399, 1335, 1207, 1173, 1125, 1027, 912, 772, 739 cm<sup>-1</sup>.

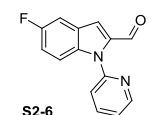

**5-Fluoro-1-(pyridin-2-yl)-1H-indole-2-carbaldehyde (S2-6):** light yellow solid; m.p. 100.4 – 101.5 °C; 768.0 mg, 64% yield; <sup>1</sup>H NMR (400 MHz, CDCl<sub>3</sub>) δ 9.95 (s, 1H), 8.66 (dd, *J* = 4.8, 1.1 Hz, 1H), 7.95 – 7.91 (m, 1H), 7.50 – 7.40 (m, 5H), 7.19 – 7.14 (m, 1H); <sup>13</sup>C NMR (101 MHz, CDCl<sub>3</sub>) δ 181.6, 158.8 (d, *J* = 240.4 Hz, <sup>1</sup>*J*<sub>CF</sub>), 150.4, 149.3, 138.4, 137.2, 136.7, 127.1 (d, *J* = 11.1 Hz, <sup>2</sup>*J*<sub>CF</sub>), 123.0, 121.6, 116.7 (d, *J* = 27.3 Hz, <sup>2</sup>*J*<sub>CF</sub>), 116.6 (d, *J* = 6.1 Hz, <sup>3</sup>*J*<sub>CF</sub>), 113.3 (d, *J* = 9.1 Hz, <sup>3</sup>*J*<sub>CF</sub>), 107.5 (d, *J* = 24.4 Hz, <sup>2</sup>*J*<sub>CF</sub>); HR-MS [ESI-MS(+)] calcd for [M + H]<sup>+</sup>: C<sub>14</sub>H<sub>10</sub>FN<sub>2</sub>O: 241.0772, found: 241.0763; IR (KBr): 3062, 2922, 1677, 1588, 1523, 1466, 1455, 1399, 1344, 1285, 1206, 1175, 1120, 1023, 911, 858, 766, 738 cm<sup>-1</sup>.

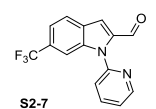

**1-(Pyridin-2-yl)-6-(trifluoromethyl)-1H-indole-2-carbaldehyde (S2-7):** light yellow solid; m.p. 103.8 – 105.0 °C; 770.0 mg, 53% yield; <sup>1</sup>H NMR (400 MHz, CDCl<sub>3</sub>) δ 10.00 (s, 1H), 8.70 (dd, *J* = 5.1, 1.5 Hz, 1H), 7.99 – 7.95 (m, 1H), 7.91 (d, *J* = 8.4 Hz, 1H), 7.80 (s, 1H), 7.53 (s, 1H), 7.51 – 7.44 (m, 3H); <sup>13</sup>C NMR (101 MHz, CDCl<sub>3</sub>) δ 181.7, 149.9, 149.6, 138.8, 138.7, 137.9, 129.1 (d, *J* = 32.3 Hz, <sup>2</sup>*J*<sub>CF</sub>), 128.9, 124.4 (d, *J* = 273.7 Hz, <sup>1</sup>*J*<sub>CF</sub>), 124.1, 123.4, 121.6, 118.7 (q, *J* = 3.0 Hz, <sup>3</sup>*J*<sub>CF</sub>), 116.1, 109.9 (q, *J* = 5.1 Hz, <sup>3</sup>*J*<sub>CF</sub>); HR-MS [ESI-MS(+)] calcd for [M + H]<sup>+</sup>: C<sub>15</sub>H<sub>10</sub>F<sub>3</sub>N<sub>2</sub>O: 291.0740, found: 291.0732; IR (KBr): 2956, 2918, 2847, 1678, 1587, 1521, 1468, 1443, 1363, 1159, 1112, 1020, 968, 876, 853, 790, 741 cm<sup>-1</sup>.

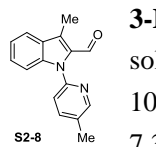

**3-Methyl-1-(5-methylpyridin-2-yl)-1H-indole-2-carbaldehyde (S2-8):** light yellow solid; m.p. 100.0 – 103.2 °C; 837.0 mg, 67% yield; <sup>1</sup>H NMR (400 MHz, CDCl<sub>3</sub>) δ 10.13 (s, 1H), 8.47 (s, 1H), 7.77 (d, *J* = 8.0 Hz, 1H), 7.71 (d, *J* = 7.9 Hz, 1H), 7.44 – 7.37 (m, 2H), 7.32 (d, *J* = 8.0 Hz, 1H), 7.25 (t, *J* = 7.1 Hz, 1H), 2.75 (s, 3H), 2.46 (s, 3H); <sup>13</sup>C NMR (101 MHz, CDCl<sub>3</sub>) δ 181.7, 149.6, 148.6, 139.2, 138.8, 132.3, 131.9, 128.0, 127.7, 127.0, 121.4, 121.3, 120.9, 111.6, 18.1, 9.3; HR-MS [ESI-MS(+)] calcd for [M + H]<sup>+</sup>: C<sub>16</sub>H<sub>15</sub>N<sub>2</sub>O: 251.1179, found: 251.1171; IR (KBr): 2918, 1867, 1828, 1668, 1540, 1477, 1446, 1384, 1339, 1224, 1138, 1024, 932, 884, 824, 741 cm<sup>-1</sup>.

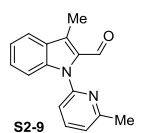

**3-Methyl-1-(6-methylpyridin-2-yl)-1H-indole-2-carbaldehyde (S2-9):** light yellow solid; m.p. 66.6 – 68.1 °C; 688.0 mg, 55% yield; <sup>1</sup>H NMR (500 MHz, CDCl<sub>3</sub>) δ 10.11 (s, 1H), 7.79 – 7.71 (m, 2H), 7.45 (d, *J* = 8.5 Hz, 1H), 7.40 – 7.35 (m, 1H), 7.24 – 7.17 (m, 3H), 2.72 (s, 3H), 2.60 (s, 3H); <sup>13</sup>C NMR (126 MHz, CDCl<sub>3</sub>) δ 182.1, 158.8, 150.1, 138.8, 138.4, 131.9, 128.1, 127.7, 126.7, 122.0, 121.5, 121.4, 118.2, 111.6, 24.3, 9.4; HR-MS [ESI-MS(+)] calcd for [M + H]<sup>+</sup>: C<sub>16</sub>H<sub>15</sub>N<sub>2</sub>O: 251.1179, found: 251.1175; IR (KBr): 3058, 2920, 1664, 1593, 1569, 1536, 1455, 1337, 1220, 1143, 992, 933, 883, 785, 737 cm<sup>-1</sup>.

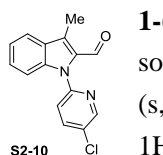

**1-(5-Chloropyridin-2-yl)-3-methyl-1H-indole-2-carbaldehyde (S2-10):** light yellow solid; m.p. 131.2 – 132.1 °C; 1.22 g, 90% yield; <sup>1</sup>H NMR (500 MHz, CDCl<sub>3</sub>) δ 10.12 (s, 1H), 8.56 (d, *J* = 2.3 Hz, 1H), 7.84 (dd, *J* = 8.5, 2.5 Hz, 1H), 7.76 (d, *J* = 7.7 Hz, 1H), 7.42 (t, *J* = 7.7 Hz, 2H), 7.33 (d, *J* = 8.5 Hz, 1H), 7.26 (d, *J* = 5.4 Hz, 1H), 2.72 (s,

3H);  $^{13}\text{C}$  NMR (126 MHz,  $\text{CDCl}_3$ )  $\delta$  181.0, 149.3, 148.0, 139.2, 137.9, 131.6, 130.5, 128.6, 128.3, 128.1, 122.2, 121.9, 121.5, 111.6, 9.2; HR-MS [ESI-MS(+)] calcd for  $[\text{M} + \text{H}]^+$ :  $\text{C}_{15}\text{H}_{12}\text{ClN}_2\text{O}$ : 271.0633, found: 271.0629; IR (KBr): 3052, 2924, 1700, 1541, 1466, 1411, 1382, 1338, 1112, 1012, 934, 888, 827, 742  $\text{cm}^{-1}$ .

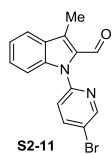

**1-(5-Bromopyridin-2-yl)-3-methyl-1H-indole-2-carbaldehyde (S2-11):** yellow solid; m.p. 118.6 – 120.3  $^{\circ}\text{C}$ ; 635.0 mg, 40% yield;  $^1\text{H}$  NMR (400 MHz,  $\text{CDCl}_3$ )  $\delta$  10.14 (s, 1H), 8.68 (d,  $J$  = 2.4 Hz, 1H), 7.99 (dd,  $J$  = 8.4, 2.4 Hz, 1H), 7.77 (d,  $J$  = 8.0 Hz, 1H), 7.50 – 7.41 (m, 2H), 7.27 (dd,  $J$  = 14.5, 6.8 Hz, 2H), 2.74 (s, 3H);  $^{13}\text{C}$  NMR (101 MHz,  $\text{CDCl}_3$ )  $\delta$  181.0, 150.2, 149.7, 140.7, 139.1, 131.6, 128.6, 128.3, 128.1, 122.7, 121.9, 121.5, 118.8, 111.6, 9.2; HR-MS [ESI-MS(+)] calcd for  $[\text{M} + \text{H}]^+$ :  $\text{C}_{15}\text{H}_{12}\text{BrN}_2\text{O}$ : 315.0128, found: 315.0128; IR (KBr): 2921, 2855, 1644, 1541, 1462, 1378, 1338, 1093, 742  $\text{cm}^{-1}$ .

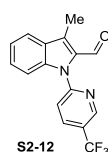

**3-Methyl-1-(5-(trifluoromethyl)pyridin-2-yl)-1H-indole-2-carbaldehyde (S2-12):** white solid; m.p. 93.0 – 95.1  $^{\circ}\text{C}$ ; 1.14 g, 75% yield;  $^1\text{H}$  NMR (400 MHz,  $\text{CDCl}_3$ )  $\delta$  10.17 (s, 1H), 8.91 – 8.86 (m, 1H), 8.10 (dd,  $J$  = 8.5, 2.1 Hz, 1H), 7.79 (d,  $J$  = 8.0 Hz, 1H), 7.61 (d,  $J$  = 8.5 Hz, 1H), 7.50 – 7.44 (m, 2H), 7.30 (dd,  $J$  = 12.2, 5.1 Hz, 1H), 2.75 (s, 3H);  $^{13}\text{C}$  NMR (101 MHz,  $\text{CDCl}_3$ )  $\delta$  180.8, 153.9, 146.2 (q,  $J$  = 4.0 Hz,  $^3J_{\text{CF}}$ ), 139.0, 135.3 (q,  $J$  = 3.0 Hz,  $^3J_{\text{CF}}$ ), 131.6, 129.8, 128.6, 128.4, 124.8 (d,  $J$  = 33.3 Hz,  $^2J_{\text{CF}}$ ), 123.4 (d,  $J$  = 273.7 Hz,  $^1J_{\text{CF}}$ ), 122.3, 121.6, 121.0, 111.8, 9.2; HR-MS [ESI-MS(+)] calcd for  $[\text{M} + \text{H}]^+$ :  $\text{C}_{16}\text{H}_{12}\text{F}_3\text{N}_2\text{O}$ : 305.0896, found: 305.0883; IR (KBr): 2922, 2830, 1668, 1601, 1541, 1488, 1454, 1397, 1324, 1128, 1077, 1013, 743  $\text{cm}^{-1}$ .

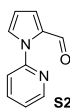

**1-(Pyridin-2-yl)-1H-pyrrole-2-carbaldehyde (S2-13):** yellow oil; 200.0 mg, 23% yield;  $^1\text{H}$  NMR (400 MHz,  $\text{CDCl}_3$ )  $\delta$  9.78 (s, 1H), 8.55 – 8.51 (m, 1H), 7.86 – 7.81 (m, 1H), 7.48 – 7.44 (m, 2H), 7.35 – 7.29 (m, 1H), 7.22 (dd,  $J$  = 3.8, 1.6 Hz, 1H), 6.44 (dd,  $J$  = 3.8, 2.7 Hz, 1H);  $^{13}\text{C}$  NMR (101 MHz,  $\text{CDCl}_3$ )  $\delta$  179.5, 150.9, 148.7, 138.3, 132.2, 130.2, 124.5, 122.7, 119.1, 111.4; HR-MS [ESI-MS(+)] calcd for  $[\text{M} + \text{H}]^+$ :  $\text{C}_{10}\text{H}_9\text{N}_2\text{O}$ : 173.0709, found: 173.0712; IR (KBr): 3115, 2924, 1667, 1588, 1528, 1473, 1450, 1438, 1414, 1391, 1337, 1316, 1151, 1107, 1034, 989, 885, 787, 740  $\text{cm}^{-1}$ .

#### Method C:

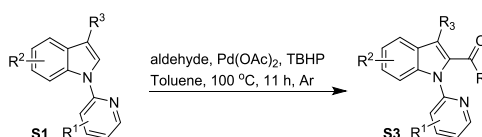

**Synthetic procedure of substituted *N*-pyridyl 2-acylindoles S3:** The following starting materials **S3** were prepared according to the literature procedures<sup>[1]</sup>. An oven-dried sealed tube charged with  $\text{Pd}(\text{OAc})_2$  (5.0 mol %), 70% TBHP aqueous solution (200 mol %), indole **S1** (3.0 mmol) and aldehydes (6.0 mmol), toluene (5.0 mL) were added under Ar atmosphere. The reaction mixture was then allowed to stir at 100  $^{\circ}\text{C}$  for 11 h. The corresponding reaction mixture was filtered through a pad of celite, washed with dichloromethane and concentrated under reduced pressure. The residue was purified by flash chromatography on silica gel using petroleum ether/ethyl acetate (20:1 ~ 10:1) as eluent to afford the desired products **S3**.

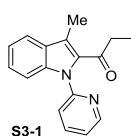

**1-(3-Methyl-1-(pyridin-2-yl)-1H-indol-2-yl)propan-1-one (S3-1):** light yellow solid; m.p. 89.1 – 90.1  $^{\circ}\text{C}$ ; 875.0 mg, 66% yield;  $^1\text{H}$  NMR (400 MHz,  $\text{CDCl}_3$ )  $\delta$  8.60 – 8.59 (m, 1H), 7.92 – 7.87 (m, 1H), 7.75 – 7.71 (m, 1H), 7.47 – 7.39 (m, 2H), 7.37 – 7.33 (m, 1H), 7.32 – 7.29 (m, 1H), 7.27 – 7.23 (m, 1H), 2.69 – 2.64 (m, 2H), 2.64 (s, 3H),

1.13 (t,  $J = 7.3$  Hz, 3H);  $^{13}\text{C}$  NMR (101 MHz,  $\text{CDCl}_3$ )  $\delta$  196.2, 152.5, 149.4, 138.3, 135.1, 128.8, 126.3, 121.9, 121.4, 121.0, 120.9, 120.3, 111.2, 36.0, 10.6, 8.4; HR-MS [ESI-MS(+)] calcd for  $[\text{M} + \text{H}]^+$ :  $\text{C}_{17}\text{H}_{17}\text{N}_2\text{O}$ : 265.1335, found: 265.1333; IR (KBr): 2917, 1682, 1590, 1474, 1437, 1343, 1243, 1220, 1142, 993, 956, 784,  $741\text{ cm}^{-1}$ .

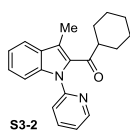

**Cyclohexyl(3-methyl-1-(pyridin-2-yl)-1H-indol-2-yl)methanone (S3-2):** white solid; m.p. 98.2 - 100.7 °C; 1.2 g, 75% yield;  $^1\text{H}$  NMR (500 MHz,  $\text{CDCl}_3$ )  $\delta$  8.56 (d,  $J = 4.4$  Hz, 1H), 7.85 (t,  $J = 7.7$  Hz, 1H), 7.69 (d,  $J = 7.9$  Hz, 1H), 7.54 (d,  $J = 8.4$  Hz, 1H), 7.39 – 7.30 (m, 2H), 7.23 (dd,  $J = 14.6$ , 7.0 Hz, 2H), 2.54 (s, 3H), 2.52 – 2.44 (m, 1H), 1.73 (t,  $J = 14.2$  Hz, 4H), 1.62 – 1.56 (m, 1H), 1.45 – 1.37 (m, 2H), 1.18 – 1.04 (m, 3H);  $^{13}\text{C}$  NMR (126 MHz,  $\text{CDCl}_3$ )  $\delta$  199.9, 152.3, 149.4, 138.3, 137.7, 134.8, 129.1, 126.0, 121.6, 121.4, 120.9, 120.4, 119.6, 111.2, 50.2, 28.9, 25.9, 25.8, 10.0; HR-MS [ESI-MS(+)] calcd for  $[\text{M} + \text{H}]^+$ :  $\text{C}_{21}\text{H}_{23}\text{N}_2\text{O}$ : 319.1805, found: 319.1804; IR (KBr): 2929, 1734, 1701, 1654, 1577, 1560, 1466, 1438, 1350, 1270, 1130,  $744\text{ cm}^{-1}$ .

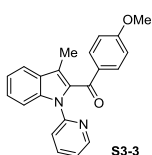

**(4-Methoxyphenyl)(3-methyl-1-(pyridin-2-yl)-1H-indol-2-yl)methanone (S3-3):** light yellow solid; m.p. 134.9 - 136.1 °C; 942.0 mg, 55% yield;  $^1\text{H}$  NMR (400 MHz,  $\text{CDCl}_3$ )  $\delta$  8.45 – 8.40 (m, 1H), 7.89 – 7.83 (m, 2H), 7.79 – 7.69 (m, 3H), 7.43 – 7.37 (m, 1H), 7.35 – 7.27 (m, 2H), 7.12 – 7.07 (m, 1H), 6.90 – 6.85 (m, 2H), 3.85 (s, 3H), 2.38 (s, 3H);  $^{13}\text{C}$  NMR (101 MHz,  $\text{CDCl}_3$ )  $\delta$  188.4, 163.4, 151.5, 149.1, 137.9, 137.4, 134.0, 132.0, 131.8, 129.1, 125.8, 121.4, 121.1, 120.6, 120.4, 119.5, 113.7, 111.4, 55.5, 10.2; HR-MS [ESI-MS(+)] calcd for  $[\text{M} + \text{H}]^+$ :  $\text{C}_{22}\text{H}_{19}\text{N}_2\text{O}_2$ : 343.1441, found: 343.1439; IR (KBr): 2929, 1734, 1654, 1577, 1560, 1438, 1150, 1280, 979,  $747\text{ cm}^{-1}$ .

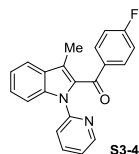

**(4-Fluorophenyl)(3-methyl-1-(pyridin-2-yl)-1H-indol-2-yl)methanone (S3-4):** light yellow solid; m.p. 137.4 - 140.2 °C; 1.17 g, 71% yield;  $^1\text{H}$  NMR (400 MHz,  $\text{CDCl}_3$ )  $\delta$  8.40 – 8.38 (m, 1H), 7.89 – 7.83 (m, 2H), 7.77 – 7.70 (m, 3H), 7.44 – 7.28 (m, 3H), 7.12 – 7.02 (m, 3H), 2.40 (s, 3H);  $^{13}\text{C}$  NMR (101 MHz,  $\text{CDCl}_3$ )  $\delta$  188.1, 165.4 (d,  $J = 255.5$  Hz,  $^1J_{\text{CF}}$ ), 151.3, 149.2, 138.0, 137.4, 135.4 (d,  $J = 3.0$  Hz,  $^3J_{\text{CF}}$ ), 133.6, 132.1 (d,  $J = 9.1$  Hz,  $^3J_{\text{CF}}$ ), 129.0, 126.2, 121.6, 121.5, 121.2, 120.9, 119.4, 115.5 (d,  $J = 22.2$  Hz,  $^2J_{\text{CF}}$ ), 111.32, 10.19; HR-MS [ESI-MS(+)] calcd for  $[\text{M} + \text{H}]^+$ :  $\text{C}_{21}\text{H}_{16}\text{FN}_2\text{O}$ : 331.1241, found: 331.1238; IR (KBr): 2925, 1734, 1685, 1675, 1654, 1617, 1598, 1438, 1268, 1230, 1150,  $742\text{ cm}^{-1}$ .

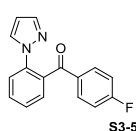

**(2-(1H-Pyrazol-1-yl)phenyl)(4-fluorophenyl)methanone (S3-5):** light yellow oil; 0.60 g, 75% yield;  $^1\text{H}$  NMR (400 MHz,  $\text{CDCl}_3$ )  $\delta$  7.69 – 7.63 (m, 4H), 7.62 – 7.57 (m, 2H), 7.53 – 7.48 (m, 1H), 7.42 (d,  $J = 1.5$  Hz, 1H), 7.00 – 6.94 (m, 2H), 6.23 – 6.20 (m, 1H);  $^{13}\text{C}$  NMR (101 MHz,  $\text{CDCl}_3$ )  $\delta$  194.3, 165.5 (d,  $J = 255.5$  Hz,  $^1J_{\text{CF}}$ ), 141.3, 138.5, 133.6, 133.3 (d,  $J = 3.0$  Hz,  $^3J_{\text{CF}}$ ), 131.7, 131.6, 131.4, 129.6 (d,  $J = 22.2$  Hz,  $^2J_{\text{CF}}$ ), 127.6, 123.2, 115.3 (d,  $J = 21.2$  Hz,  $^2J_{\text{CF}}$ ), 107.8; HR-MS [ESI-MS(+)] calcd for  $[\text{M} + \text{H}]^+$ :  $\text{C}_{16}\text{H}_{12}\text{FN}_2\text{O}$ : 267.0928, found: 267.0926; IR (KBr): 3117, 2924, 1669, 1598, 1519, 1451, 1409, 1306, 1274, 1236, 1149, 1046, 931, 758,  $617\text{ cm}^{-1}$ .

#### Method D:

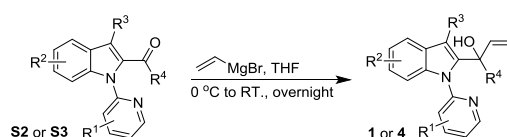

**Synthetic procedure of  $\alpha$ -(2-indolyl) allylic alcohols 1 and 4:** 2-Acylindoles (which were

prepared according to the previous literatures)<sup>[1, 3]</sup> (1.0 mmol) was dissolved in anhydrous THF (10 mL) in an oven dried round bottom flask under Ar environment. The solution was then cooled to 0 °C and a solution of vinylmagnesium bromide in THF (2.0 mL, 2.0 mmol, 1.0 M) was added dropwise. The reaction was warmed to room temperature and stirred overnight. then was quenched by saturated NH<sub>4</sub>Cl (aq), extracted by EtOAc for three times (3 × 5 mL), dried over anhydrous Na<sub>2</sub>SO<sub>4</sub>, and evaporated in vacuum to afford the crude product, which was further purified by flash chromatography on silica gel with petroleum ether/EtOAc (50: 1 ~ 10: 1) to give the corresponding alcohols **1** or **4**.

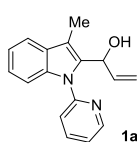

**1-(3-Methyl-1-(pyridin-2-yl)-1H-indol-2-yl)prop-2-en-1-ol (1a):** light yellow oil; 238.0 mg, 90% yield; <sup>1</sup>H NMR (500 MHz, CDCl<sub>3</sub>) δ 8.49 (dd, *J* = 5.0, 1.1 Hz, 1H), 7.90 – 7.86 (m, 1H), 7.61 (dd, *J* = 6.2, 2.7 Hz, 1H), 7.56 (d, *J* = 8.1 Hz, 1H), 7.45 (dd, *J* = 6.4, 2.3 Hz, 1H), 7.27 – 7.19 (m, 3H), 6.82 (d, *J* = 10.1 Hz, 1H), 5.80 – 5.73 (m, 1H), 5.57 (d, *J* = 9.5 Hz, 1H), 5.01 (d, *J* = 17.3 Hz, 1H), 4.77 (d, *J* = 10.6 Hz, 1H), 2.43 (s, 3H); <sup>13</sup>C NMR (126 MHz, CDCl<sub>3</sub>) δ 152.0, 148.0, 139.1, 138.9, 136.9, 136.0, 129.7, 123.4, 121.5, 121.0, 119.9, 119.7, 113.9, 112.9, 110.0, 66.1, 9.1; HR-MS [ESI-MS(+)] calcd for [M + H – H<sub>2</sub>O]<sup>+</sup>: C<sub>17</sub>H<sub>15</sub>N<sub>2</sub>: 247.1230, found: 247.1226; IR (KBr): 3723, 3634, 3056, 2921, 1591, 1475, 1456, 1439, 1363, 1319, 1223, 1150, 1111, 988, 779, 740 cm<sup>-1</sup>.

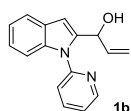

**1-(1-(pyridin-2-yl)-1H-indol-2-yl)prop-2-en-1-ol (1b):** light yellow solid; m.p. 60.6 – 61.6 °C; 223.0 mg, 89% yield; <sup>1</sup>H NMR (400 MHz, CDCl<sub>3</sub>) δ 8.60 – 8.56 (m, 1H), 7.99 – 7.95 (m, 1H), 7.70 – 7.64 (m, 2H), 7.55 – 7.51 (m, 1H), 7.36 – 7.32 (m, 1H), 7.27 – 7.19 (m, 2H), 6.70 (s, 1H), 6.54 (d, *J* = 4.9 Hz, 1H), 6.19 – 6.11 (m, 1H), 5.46 – 5.41 (m, 1H), 5.30 (s, 1H), 5.22 – 5.19 (m, 1H); <sup>13</sup>C NMR (101 MHz, CDCl<sub>3</sub>) δ 151.3, 148.5, 142.3, 139.2, 137.1, 136.7, 128.6, 123.1, 121.7, 121.5, 121.4, 119.9, 115.5, 110.3, 104.8, 67.2; HR-MS [ESI-MS(+)] calcd for [M + H – H<sub>2</sub>O]<sup>+</sup>: C<sub>16</sub>H<sub>13</sub>N<sub>2</sub>: 233.1073, found: 233.1064; IR (KBr): 3671, 3646, 2921, 1866, 1681, 1647, 1541, 1454, 1434, 1373, 1338, 1206, 1145, 736 cm<sup>-1</sup>.

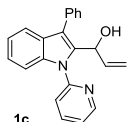

**1-(3-Phenyl-1-(pyridin-2-yl)-1H-indol-2-yl)prop-2-en-1-ol (1c):** light yellow oil; 218.0 mg, 67 % yield; <sup>1</sup>H NMR (400 MHz, CDCl<sub>3</sub>) δ 8.58 (dd, *J* = 5.0, 1.2 Hz, 1H), 7.99 – 7.95 (m, 1H), 7.75 (d, *J* = 7.7 Hz, 1H), 7.68 (d, *J* = 8.0 Hz, 3H), 7.55 (dd, *J* = 12.5, 5.1 Hz, 3H), 7.42 (t, *J* = 7.4 Hz, 1H), 7.36 – 7.23 (m, 3H), 6.76 (d, *J* = 9.5 Hz, 1H), 5.77 – 5.69 (m, 1H), 5.58 (s, 1H), 4.97 (d, *J* = 17.3 Hz, 1H), 4.76 – 4.69 (m, 1H); <sup>13</sup>C NMR (101 MHz, CDCl<sub>3</sub>) δ 151.9, 148.2, 139.2, 138.9, 137.4, 136.2, 133.9, 130.3, 128.7, 128.3, 127.1, 123.7, 122.0, 121.7, 120.5, 120.2, 120.1, 113.8, 110.1, 66.6; HR-MS [ESI-MS(+)] calcd for [M + H – H<sub>2</sub>O]<sup>+</sup>: C<sub>22</sub>H<sub>17</sub>N<sub>2</sub>: 309.1386, found: 309.1380; IR (KBr): 3729, 3629, 3055, 1591, 1472, 1438, 1369, 1149, 987, 921, 771, 742, 702 cm<sup>-1</sup>.

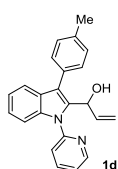

**1-(1-(pyridin-2-yl)-3-(p-tolyl)-1H-indol-2-yl)prop-2-en-1-ol (1d):** light yellow oil; 262.0 mg, 77% yield; <sup>1</sup>H NMR (400 MHz, CDCl<sub>3</sub>) δ 8.58 – 8.56 (m, 1H), 7.98 – 7.93 (m, 1H), 7.76 (d, *J* = 7.8 Hz, 1H), 7.67 (d, *J* = 8.1 Hz, 1H), 7.62 – 7.54 (m, 3H), 7.38 (d, *J* = 8.0 Hz, 2H), 7.34 – 7.24 (m, 3H), 6.79 (dd, *J* = 10.9, 1.2 Hz, 1H), 5.82 – 5.69 (m, 1H), 5.62 (dd, *J* = 10.9, 2.0 Hz, 1H), 4.99 (d, *J* = 17.2 Hz, 1H), 4.73 (d, *J* = 10.6 Hz, 1H), 2.49 (s, 3H); <sup>13</sup>C NMR (101 MHz, CDCl<sub>3</sub>) δ 151.9, 148.2, 139.2, 138.9, 137.3, 136.8, 136.2, 130.9, 130.2, 129.4, 128.4, 123.7, 121.9, 121.6, 120.6, 120.2, 120.1, 113.8, 110.1, 66.7, 21.4; HR-MS [ESI-MS(+)] calcd for [M + H – H<sub>2</sub>O]<sup>+</sup>: C<sub>23</sub>H<sub>19</sub>N<sub>2</sub>: 323.1543, found: 323.1535; IR (KBr): 3049, 3022, 2920, 1591, 1473, 1455, 1439, 1319, 1229, 1108, 989, 831, 784, 743 cm<sup>-1</sup>.

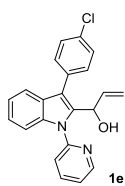

**1-(3-(4-Chlorophenyl)-1-(pyridin-2-yl)-1H-indol-2-yl)prop-2-en-1-ol (1e):** light yellow solid; m.p. 120.3 - 123.4 °C; 220.0 mg, 61% yield;  $^1\text{H}$  NMR (400 MHz,  $\text{CDCl}_3$ )  $\delta$  8.57 (dd,  $J$  = 5.0, 1.2 Hz, 1H), 7.99 – 7.95 (m, 1H), 7.73 – 7.60 (m, 4H), 7.54 (dd,  $J$  = 15.1, 8.2 Hz, 3H), 7.38 – 7.24 (m, 3H), 6.72 (d,  $J$  = 10.9 Hz, 1H), 5.76 – 5.68 (m, 1H), 5.58 – 5.47 (m, 1H), 4.99 (d,  $J$  = 17.3 Hz, 1H), 4.78 – 4.71 (m, 1H);  $^{13}\text{C}$  NMR (101 MHz,  $\text{CDCl}_3$ )  $\delta$  151.7, 148.3, 139.3, 138.6, 137.6, 136.2, 133.0, 132.5, 131.6, 128.9, 128.0, 124.0, 122.2, 121.9, 120.3, 120.2, 118.9, 114.1, 110.3, 66.6; HR-MS [ESI-MS(+)] calcd for  $[\text{M} + \text{H}]^+$ :  $\text{C}_{22}\text{H}_{18}\text{ClN}_2\text{O}$ : 361.1102, found: 361.1112; IR (KBr): 3661, 3621, 2926, 1654, 1467, 1438, 1382, 1368, 740  $\text{cm}^{-1}$ .

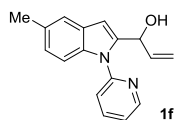

**1-(5-Methyl-1-(pyridin-2-yl)-1H-indol-2-yl)prop-2-en-1-ol (1f):** light yellow solid; m.p. 90.5 - 91.5 °C; 262.0 mg, 77% yield;  $^1\text{H}$  NMR (400 MHz,  $\text{CDCl}_3$ )  $\delta$  8.58 – 8.52 (m, 1H), 7.97 – 7.89 (m, 1H), 7.64 (d,  $J$  = 8.1 Hz, 1H), 7.47 – 7.40 (m, 2H), 7.30 (dd,  $J$  = 7.4, 5.0 Hz, 1H), 7.08 (dd,  $J$  = 8.5, 1.3 Hz, 1H), 6.66 – 6.61 (m, 2H), 6.21 – 6.12 (m, 1H), 5.48 – 5.42 (m, 1H), 5.34 – 5.27 (m, 1H), 5.23 – 5.20 (m, 1H), 2.49 (s, 3H);  $^{13}\text{C}$  NMR (101 MHz,  $\text{CDCl}_3$ )  $\delta$  151.5, 148.3, 142.3, 139.2, 137.2, 135.0, 130.8, 128.9, 124.6, 121.5, 121.2, 119.7, 115.4, 110.1, 104.6, 67.2, 21.4; HR-MS [ESI-MS(+)] calcd for  $[\text{M} + \text{H} - \text{H}_2\text{O}]^+$ :  $\text{C}_{17}\text{H}_{15}\text{N}_2$ : 247.1230, found: 247.1223; IR (KBr): 3652, 3017, 2919, 1593, 1578, 1474, 1439, 1371, 1340, 1300, 1215, 1174, 1129, 1021, 989, 875, 779, 744  $\text{cm}^{-1}$ .

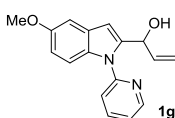

**1-(5-Methoxy-1-(pyridin-2-yl)-1H-indol-2-yl)prop-2-en-1-ol (1g):** yellow oil; 196.0 mg, 70% yield;  $^1\text{H}$  NMR (400 MHz,  $\text{CDCl}_3$ )  $\delta$  8.58 – 8.53 (m, 1H), 7.98 – 7.92 (m, 1H), 7.64 (d,  $J$  = 8.2 Hz, 1H), 7.42 (d,  $J$  = 9.0 Hz, 1H), 7.33 – 7.27 (m, 1H), 7.11 (d,  $J$  = 2.5 Hz, 1H), 6.88 (dd,  $J$  = 9.0, 2.5 Hz, 1H), 6.60 (d,  $J$  = 8.3 Hz, 2H), 6.18 – 6.10 (m, 1H), 5.45 – 5.40 (m, 1H), 5.27 (s, 1H), 5.22 – 5.18 (dt,  $J$  = 10.6, 1.7 Hz, 1H), 3.88 (s, 3H);  $^{13}\text{C}$  NMR (101 MHz,  $\text{CDCl}_3$ )  $\delta$  155.2, 151.4, 148.4, 142.8, 139.2, 137.0, 131.7, 129.3, 121.5, 119.5, 115.4, 112.9, 111.2, 104.7, 103.2, 67.2, 55.8; HR-MS [ESI-MS(+)] calcd for  $[\text{M} + \text{H} - \text{H}_2\text{O}]^+$ :  $\text{C}_{17}\text{H}_{15}\text{N}_2\text{O}$ : 263.1179, found: 263.1172; IR (KBr): 3745, 3071, 2921, 2850, 1583, 1475, 1450, 1377, 1203, 1172, 1120, 1132, 781  $\text{cm}^{-1}$ .

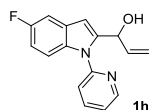

**1-(5-Fluoro-1-(pyridin-2-yl)-1H-indol-2-yl)prop-2-en-1-ol (1h):** light yellow oil; 200.0 mg, 75% yield;  $^1\text{H}$  NMR (400 MHz,  $\text{CDCl}_3$ )  $\delta$  8.59 – 8.57 (m, 1H), 8.01 – 7.94 (m, 1H), 7.63 (d,  $J$  = 8.1 Hz, 1H), 7.43 (dd,  $J$  = 9.0, 4.3 Hz, 1H), 7.37 – 7.34 (m, 1H), 7.29 (dd,  $J$  = 9.2, 2.4 Hz, 1H), 7.00 – 6.95 (m, 1H), 6.64 (s, 1H), 6.42 (d,  $J$  = 5.2 Hz, 1H), 6.17 – 6.09 (m, 1H), 5.46 – 5.41 (m, 1H), 5.26 (dd,  $J$  = 5.8, 4.0 Hz, 1H), 5.23 – 5.20 (m, 1H);  $^{13}\text{C}$  NMR (101 MHz,  $\text{CDCl}_3$ )  $\delta$  158.6 (d,  $J$  = 237.4 Hz,  $^1J_{\text{CF}}$ ), 151.1, 148.6, 143.7, 139.4, 136.7, 133.2, 129.2 (d,  $J$  = 10.1 Hz,  $^3J_{\text{CF}}$ ), 121.9, 119.7, 115.7, 111.3 (d,  $J$  = 15.2 Hz,  $^2J_{\text{CF}}$ ), 111.1, 106.4 (d,  $J$  = 23.2 Hz,  $^2J_{\text{CF}}$ ), 104.6 (d,  $J$  = 4.0 Hz,  $^3J_{\text{CF}}$ ), 67.1; HR-MS [ESI-MS(+)] calcd for  $[\text{M} + \text{Na}]^+$ :  $\text{C}_{16}\text{H}_{13}\text{FN}_2\text{ONa}$ : 291.0904, found: 291.0909; IR (KBr): 3732, 2922, 1582, 1472, 1488, 1373, 1173, 1106, 986, 927, 853, 771  $\text{cm}^{-1}$ .

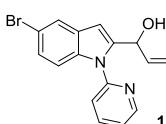

**1-(5-Bromo-1-(pyridin-2-yl)-1H-indol-2-yl)prop-2-en-1-ol (1i):** yellow solid; m.p. 110.5 - 112.5 °C; 170.0 mg, 52% yield;  $^1\text{H}$  NMR (400 MHz,  $\text{CDCl}_3$ )  $\delta$  8.58 (d,  $J$  = 4.3 Hz, 1H), 8.00 – 7.96 (m, 1H), 7.76 (d,  $J$  = 1.7 Hz, 1H), 7.60 (d,  $J$  = 8.1 Hz, 1H), 7.38 – 7.35 (m, 2H), 7.32 – 7.28 (m, 1H), 6.61 (s, 1H), 6.36 (d,  $J$  = 5.2 Hz, 1H), 6.16 – 6.08 (m, 1H), 5.46 – 5.41 (m, 1H), 5.26 (t,  $J$  = 4.9 Hz, 1H), 5.23 – 5.20 (m, 1H);  $^{13}\text{C}$  NMR (101 MHz,  $\text{CDCl}_3$ )  $\delta$  150.9, 148.6, 143.5, 139.4, 136.7, 135.4, 130.3, 125.9, 123.9, 122.2, 119.8, 115.8, 114.4, 111.8, 104.0, 67.0; HR-MS [ESI-MS(+)] calcd for  $[\text{M} + \text{H} - \text{H}_2\text{O}]^+$ :

$C_{16}H_{12}BrN_2$ : 311.0178, found: 311.0168; IR (KBr): 3740, 3064, 1573, 1555, 1400, 1367, 1338, 1288, 1201, 1142, 984, 922, 865, 768  $cm^{-1}$ .

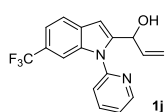

**1-(1-(Pyridin-2-yl)-6-(trifluoromethyl)-1H-indol-2-yl)prop-2-en-1-ol (1j):**

brown oil; 216.0 mg, 68% yield;  $^1H$  NMR (400 MHz,  $CDCl_3$ )  $\delta$  8.64 – 8.59 (m, 1H), 8.05 – 8.02 (m, 1H), 7.74 (d,  $J$  = 11.1 Hz, 2H), 7.64 (d,  $J$  = 8.1 Hz, 1H), 7.47 – 7.39 (m, 2H), 6.74 (s, 1H), 6.29 (d,  $J$  = 5.3 Hz, 1H), 6.17 – 6.09 (m, 1H), 5.47 – 5.42 (m, 1H), 5.30 (t,  $J$  = 4.9 Hz, 1H), 5.26 – 5.19 (m, 1H);  $^{13}C$  NMR (101 MHz,  $CDCl_3$ )  $\delta$  150.6, 148.8, 145.0, 139.7, 136.5, 135.8, 131.0, 125.1 (d,  $J$  = 32.3 Hz,  $^2J_{CF}$ ), 125.0 (d,  $J$  = 272.7 Hz,  $^1J_{CF}$ ), 122.5, 121.8, 120.0, 118.1 (q,  $J$  = 4.0 Hz,  $^3J_{CF}$ ), 115.9, 107.8 (q,  $J$  = 4.0 Hz,  $^3J_{CF}$ ), 104.5, 67.0; HR-MS [ESI-MS(+)] calcd for  $[M + Na]^+$ :  $C_{17}H_{13}F_3N_2ONa$ : 341.0872, found: 341.0875; IR (KBr): 3317, 3069, 2922, 2852, 1592, 1474, 1439, 1347, 1323, 1163, 1115, 1050, 992, 968, 870, 828, 786  $cm^{-1}$ .

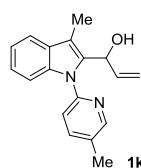

**1-(3-Methyl-1-(5-methylpyridin-2-yl)-1H-indol-2-yl)prop-2-en-1-ol (1k):**

light yellow solid; m.p. 77.4 – 78.6  $^{\circ}C$ ; 222.0 mg, 80% yield;  $^1H$  NMR (400 MHz,  $CDCl_3$ )  $\delta$  8.34 (s, 1H), 7.73 – 7.71 (m, 1H), 7.67 – 7.60 (m, 1H), 7.50 – 7.43 (m, 2H), 7.29 – 7.21 (m, 2H), 6.88 (d,  $J$  = 10.0 Hz, 1H), 5.84 – 5.76 (m, 1H), 5.58 (d,  $J$  = 7.4 Hz, 1H), 5.05 (d,  $J$  = 17.3 Hz, 1H), 4.82 (d,  $J$  = 10.5 Hz, 1H), 2.46 (s, 3H), 2.43 (s, 3H);  $^{13}C$  NMR (101 MHz,  $CDCl_3$ )  $\delta$  149.7, 148.0, 139.7, 139.0, 136.9, 136.1, 131.3, 129.6, 123.2, 120.7, 119.6, 119.4, 113.9, 112.4, 110.0, 66.2, 18.0, 9.1; HR-MS [ESI-MS(+)] calcd for  $[M + H - H_2O]^+$ :  $C_{18}H_{17}N_2$ : 261.1386, found: 261.1383; IR (KBr): 3730, 3624, 2920, 1731, 1715, 1599, 1573, 1486, 1457, 1396, 1360, 1318, 1226, 1109, 1033, 987, 923, 829, 740  $cm^{-1}$ .

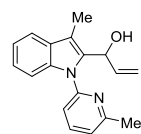

**1-(3-Methyl-1-(6-methylpyridin-2-yl)-1H-indol-2-yl)prop-2-en-1-ol (1l):**

light yellow solid; m.p. 90.4 – 91.8  $^{\circ}C$ ; 214.0 mg, 77% yield;  $^1H$  NMR (500 MHz,  $CDCl_3$ )  $\delta$  7.76 (t,  $J$  = 7.8 Hz, 1H), 7.61 – 7.60 (m, 1H), 7.48 – 7.43 (m, 1H), 7.35 (d,  $J$  = 8.0 Hz, 1H), 7.23 – 7.17 (m, 2H), 7.09 (d,  $J$  = 7.6 Hz, 1H), 7.03 (d,  $J$  = 9.9 Hz, 1H), 5.80 – 5.73 (m, 1H), 5.56 (d,  $J$  = 7.6 Hz, 1H), 5.01 (d,  $J$  = 17.3 Hz, 1H), 4.78 (d,  $J$  = 10.5 Hz, 1H), 2.59 (s, 3H), 2.43 (s, 3H);  $^{13}C$  NMR (126 MHz,  $CDCl_3$ )  $\delta$  157.5, 151.3, 139.2, 139.2, 137.0, 136.1, 129.7, 123.2, 120.9, 120.8, 119.6, 116.7, 113.7, 112.7, 110.1, 66.1, 23.9, 9.1; HR-MS [ESI-MS(+)] calcd for  $[M + H - H_2O]^+$ :  $C_{18}H_{17}N_2$ : 261.1386, found: 261.1378; IR (KBr): 3647, 2918, 1573, 1541, 1455, 1359, 1223, 1152, 1109, 984, 919, 737  $cm^{-1}$ .

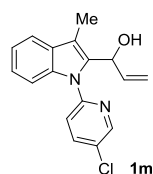

**1-(1-(5-Chloropyridin-2-yl)-3-methyl-1H-indol-2-yl)prop-2-en-1-ol (1m):**

light yellow solid; m.p. 133.1 – 134.3  $^{\circ}C$ ; 238.0 mg, 80% yield;  $^1H$  NMR (500 MHz,  $CDCl_3$ )  $\delta$  8.45 (d,  $J$  = 2.5 Hz, 1H), 7.86 – 7.84 (m, 1H), 7.62 – 7.61 (m, 1H), 7.52 (d,  $J$  = 8.6 Hz, 1H), 7.41 – 7.39 (m, 1H), 7.24 – 7.20 (m, 2H), 6.15 (d,  $J$  = 10.3 Hz, 1H), 5.82 – 5.76 (m, 1H), 5.58 – 5.54 (m, 1H), 5.07 – 4.99 (m, 1H), 4.87 – 4.79 (m, 1H), 2.42 (s, 3H);  $^{13}C$  NMR (126 MHz,  $CDCl_3$ )  $\delta$  150.3, 146.8, 138.9, 138.9, 136.6, 136.0, 129.8, 129.2, 123.6, 121.2, 120.6, 119.8, 114.2, 113.5, 109.8, 66.0, 9.1; HR-MS [ESI-MS(+)] calcd for  $[M + H - H_2O]^+$ :  $C_{17}H_{14}ClN_2$ : 281.0840, found: 281.0835; IR (KBr): 3671, 3646, 3564, 3054, 2919, 1681, 1541, 1488, 1470, 1417, 1395, 1116, 986, 924, 743  $cm^{-1}$ .

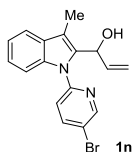

**1-(1-(5-Bromopyridin-2-yl)-3-methyl-1H-indol-2-yl)prop-2-en-1-ol (1n):**

white solid; m.p. 107.4 – 112.7  $^{\circ}C$ ; 140.0 mg, 41% yield;  $^1H$  NMR (400 MHz,  $CDCl_3$ )  $\delta$  8.57 (d,  $J$  = 2.1 Hz, 1H), 8.02 – 7.99 (m, 1H), 7.66 – 7.64 (m, 1H), 7.49 (d,  $J$  = 8.6 Hz, 1H), 7.44 – 7.43 (m, 1H), 7.29 – 7.24 (m, 2H), 6.19 (d,  $J$  = 10.1 Hz, 1H), 5.87 – 5.79 (m, 1H), 5.60 (d,  $J$  = 7.3 Hz, 1H), 5.07 (d,  $J$  = 17.3 Hz, 1H), 4.88 (d,  $J$  = 10.5 Hz, 1H), 2.46 (s, 3H);  $^{13}C$  NMR (101 MHz,  $CDCl_3$ )  $\delta$  150.7, 149.1, 141.7, 138.8, 136.6, 135.9, 129.8, 123.7,



121.3, 121.1, 119.8, 117.1, 114.3, 113.6, 109.8, 66.1, 9.2; HR-MS [ESI-MS(+)] calcd for  $[M + H - H_2O]^+$ :  $C_{17}H_{14}BrN_2$ : 325.0335, found: 325.0327; IR (KBr): 3445, 2920, 1648, 1547, 1467, 1386, 1316, 1220, 1099, 1011, 924, 740  $cm^{-1}$ .

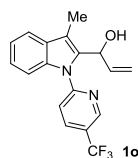

**1-(3-Methyl-1-(5-(trifluoromethyl)pyridin-2-yl)-1H-indol-2-yl)prop-2-en-1-ol (1o):**

light yellow solid; m.p. 137.0 – 139.0 °C; 133.0 mg, 40% yield;  $^1H$  NMR (400 MHz,  $CDCl_3$ )  $\delta$  8.79 – 8.78 (m, 1H), 8.15 – 8.12 (m, 1H), 7.73 (d,  $J$  = 8.5 Hz, 1H), 7.68 – 7.65 (m, 1H), 7.54 – 7.48 (m, 1H), 7.32 – 7.27 (m, 2H), 6.30 (d,  $J$  = 10.3 Hz, 1H), 5.88 – 5.80 (m, 1H), 5.66 – 5.61 (m, 1H), 5.09 – 5.03 (m, 1H), 4.88 – 4.85 (m, 1H), 2.47 (s, 3H);  $^{13}C$  NMR (101 MHz,  $CDCl_3$ )  $\delta$  154.6, 145.4 (q,  $J$  = 4.0 Hz,  $^3J_{CF}$ ), 138.9, 136.7, 136.4 (q,  $J$  = 3.0 Hz,  $^3J_{CF}$ ), 135.8, 130.2, 124.0 (d,  $J$  = 34.3 Hz,  $^2J_{CF}$ ), 123.9, 123.2 (d,  $J$  = 272.7 Hz,  $^1J_{CF}$ ), 121.8, 119.9, 119.4, 114.7, 114.3, 109.9, 66.0, 9.2; HR-MS [ESI-MS(+)] calcd for  $[M + H - H_2O]^+$ :  $C_{18}H_{14}F_3N_2$ : 315.1098, found: 315.1093; IR (KBr): 3646, 3615, 2923, 1647, 1541, 1488, 1455, 1327, 1164, 1128, 747  $cm^{-1}$ .

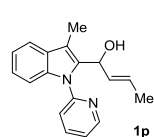

**(E)-1-(3-Methyl-1-(pyridin-2-yl)-1H-indol-2-yl)but-2-en-1-ol (1p):**

light yellow oil; 150.0 mg, 54% yield;  $^1H$  NMR (500 MHz,  $CDCl_3$ )  $\delta$  8.56 – 8.53 (m, 1H), 7.95 – 7.92 (m, 1H), 7.63 – 7.59 (m, 2H), 7.47 – 7.45 (m, 1H), 7.31 – 7.28 (m, 1H), 7.23 – 7.18 (m, 2H), 6.76 (d,  $J$  = 10.3 Hz, 1H), 5.80 – 5.77 (m, 1H), 5.27 – 5.17 (m, 2H), 2.47 (s, 3H), 1.50 (d,  $J$  = 6.2 Hz, 3H);  $^{13}C$  NMR (126 MHz,  $CDCl_3$ )  $\delta$  152.2, 148.3, 139.2, 138.0, 135.9, 131.9, 129.8, 125.3, 123.2, 121.5, 120.9, 119.9, 119.6, 112.1, 109.9, 62.4, 13.0, 9.1; HR-MS [ESI-MS(+)] calcd for  $[M + H - H_2O]^+$ :  $C_{18}H_{17}N_2$ : 261.1386, found: 261.1383; IR (KBr): 3699, 3631, 2923, 1852, 1585, 1438, 1352, 1216, 970, 740  $cm^{-1}$ .

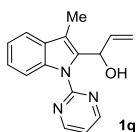

**1-(3-Methyl-1-(pyrimidin-2-yl)-1H-indol-2-yl)prop-2-en-1-ol (1q):**

light yellow solid; m.p. 94.4 – 96.7 °C; 123.0 mg, 46% yield;  $^1H$  NMR (500 MHz,  $CDCl_3$ )  $\delta$  8.73 (d,  $J$  = 4.8 Hz, 2H), 8.38 (d,  $J$  = 8.3 Hz, 1H), 7.58 (d,  $J$  = 7.7 Hz, 1H), 7.33 – 7.23 (m, 2H), 7.11 (t,  $J$  = 4.8 Hz, 1H), 6.95 (d,  $J$  = 10.8 Hz, 1H), 5.97 – 5.91 (m, 1H), 5.68 – 5.65 (m, 1H), 5.03 (d,  $J$  = 17.4 Hz, 1H), 4.87 (d,  $J$  = 10.6 Hz, 1H), 2.42 (s, 3H);  $^{13}C$  NMR (126 MHz,  $CDCl_3$ )  $\delta$  157.8, 157.7, 139.9, 136.5, 135.7, 130.4, 124.4, 122.2, 119.2, 116.7, 116.6, 114.4, 114.2, 66.1, 9.4; HR-MS [ESI-MS(+)] calcd for  $[M + H - H_2O]^+$ :  $C_{16}H_{14}N_3$ : 248.1182, found: 248.1171; IR (KBr): 3671, 3647, 2921, 1563, 1541, 1488, 1455, 1429, 1339, 1010, 744  $cm^{-1}$ .

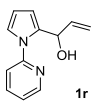

**1-(1-(Pyridin-2-yl)-1H-pyrrol-2-yl)prop-2-en-1-ol (1r):**

brown oil; 55.0 mg, 28% yield;  $^1H$  NMR (500 MHz,  $CDCl_3$ )  $\delta$  8.43 (d,  $J$  = 4.7 Hz, 1H), 7.89 – 7.78 (m, 1H), 7.37 (d,  $J$  = 8.2 Hz, 1H), 7.24 – 7.22 (m, 1H), 7.05 (s, 1H), 6.67 (d,  $J$  = 5.1 Hz, 1H), 6.29 – 6.27 (m, 2H), 6.15 – 6.09 (m, 1H), 5.39 (d,  $J$  = 17.2 Hz, 1H), 5.23 (s, 1H), 5.16 (d,  $J$  = 10.5 Hz, 1H).  $^{13}C$  NMR (126 MHz,  $CDCl_3$ )  $\delta$  152.4, 147.5, 139.6, 137.7, 135.9, 121.4, 121.1, 116.3, 115.0, 111.5, 110.3, 66.7; HR-MS [ESI-MS(+)] calcd for  $[M + H - H_2O]^+$ :  $C_{12}H_{11}N_2$ : 183.0917, found: 183.0916; IR (KBr): 3647, 2924, 2855, 1867, 1714, 1681, 1647, 1472, 1440, 1417, 1338, 1154, 993  $cm^{-1}$ .

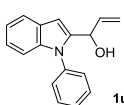

**1-(1-Phenyl-1H-indol-2-yl)prop-2-en-1-ol (1u):**

yellow solid; m.p. 95.7 – 99.3 °C; 154.4 mg, 62% yield;  $^1H$  NMR (400 MHz,  $CDCl_3$ )  $\delta$  7.68 – 7.66 (m, 1H), 7.59 – 7.48 (m, 5H), 7.20 – 7.13 (m, 3H), 6.68 (s, 1H), 6.23 – 6.14 (m, 1H), 5.35 – 5.31 (m, 1H), 5.27 – 5.24 (m, 1H), 5.24 – 5.20 (m, 1H), 1.85 (d,  $J$  = 6.0 Hz, 1H).  $^{13}C$  NMR (101 MHz,  $CDCl_3$ )  $\delta$  141.5, 138.7, 138.1, 137.5, 129.5, 128.5, 128.2, 127.4, 122.5, 120.8, 120.4, 115.7, 110.6,

101.3, 67.5; HR-MS [ESI-MS(+)] calcd for  $[M + H - H_2O]^+$ :  $C_{17}H_{14}N_2$ : 232.1121, found: 232.1118; IR (KBr): 3057, 2921, 1595, 1498, 1454, 1338, 1217, 1017, 988, 929, 750, 698  $cm^{-1}$ .

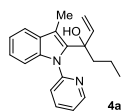

**3-(3-Methyl-1-(pyridin-2-yl)-1H-indol-2-yl)hex-1-en-3-ol (4a)**: yellow solid; m.p. 58.7 - 60.3 °C; 202.0 mg, 66% yield;  $^1H$  NMR (400 MHz,  $CDCl_3$ )  $\delta$  8.54 - 8.52 (m, 1H), 7.94 - 7.89 (m, 1H), 7.67 - 7.63 (m, 1H), 7.50 (d,  $J$  = 8.0 Hz, 1H), 7.35 - 7.31 (m, 1H), 7.23 - 7.17 (m, 3H), 6.66 (s, 1H), 6.02 - 5.95 (m, 1H), 5.09 - 5.04 (m, 1H), 4.82 - 4.79 (m, 1H), 2.56 (s, 3H), 2.11 - 2.02 (m, 1H), 1.93 - 1.86 (m, 1H), 1.50 - 1.40 (m, 1H), 1.36 - 1.25 (m, 1H), 0.89 (t,  $J$  = 7.4 Hz, 3H);  $^{13}C$  NMR (101 MHz,  $CDCl_3$ )  $\delta$  153.5, 148.1, 142.9, 139.1, 138.9, 136.9, 130.2, 123.1, 122.3, 122.3, 120.6, 119.2, 112.2, 111.3, 109.6, 75.2, 43.5, 17.3, 14.5, 11.3; HR-MS [ESI-MS(+)] calcd for  $[M + H - H_2O]^+$ :  $C_{20}H_{21}N_2$ : 289.1699, found: 289.1684; IR (KBr): 3341, 2959, 2928, 2870, 1591, 1473, 1458, 1437, 1357, 1311, 1205, 1150, 1002, 921, 777, 741  $cm^{-1}$ .

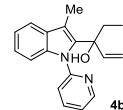

**3-(3-Methyl-1-(pyridin-2-yl)-1H-indol-2-yl)pent-1-en-3-ol (4b)**: yellow solid; m.p. 64.0 - 65.2 °C; 102.0 mg, 35% yield;  $^1H$  NMR (500 MHz,  $CDCl_3$ )  $\delta$  8.49 (d,  $J$  = 4.4 Hz, 1H), 7.87 (t,  $J$  = 7.7 Hz, 1H), 7.64 - 7.59 (m, 1H), 7.47 (d,  $J$  = 8.0 Hz, 1H), 7.32 - 7.27 (m, 1H), 7.21 - 7.14 (m, 3H), 6.68 (s, 1H), 5.92 - 5.87 (m, 1H), 5.01 (d,  $J$  = 17.3 Hz, 1H), 4.78 (d,  $J$  = 10.7 Hz, 1H), 2.54 (s, 3H), 2.18 - 2.11 (m, 1H), 1.99 - 1.92 (m, 1H), 0.89 (t,  $J$  = 7.3 Hz, 3H);  $^{13}C$  NMR (126 MHz,  $CDCl_3$ )  $\delta$  153.5, 148.0, 142.4, 139.1, 139.0, 136.9, 130.3, 123.1, 122.3, 122.3, 120.6, 119.2, 112.6, 111.2, 109.6, 75.5, 33.5, 11.3, 8.3; HR-MS [ESI-MS(+)] calcd for  $[M + H - H_2O]^+$ :  $C_{19}H_{19}N_2$ : 275.1543, found: 275.1536; IR (KBr): 3671, 3646, 3055, 2921, 2855, 1589, 1556, 1472, 1455, 1434, 1351, 1143, 963, 919, 738  $cm^{-1}$ .

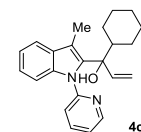

**1-Cyclohexyl-1-(3-methyl-1-(pyridin-2-yl)-1H-indol-2-yl)prop-2-en-1-ol (4c)**: yellow oil; 243.0 mg, 70% yield;  $^1H$  NMR (500 MHz,  $CDCl_3$ )  $\delta$  8.55 - 8.50 (m, 1H), 7.94 - 7.91 (m, 1H), 7.61 - 7.56 (m, 1H), 7.52 (d,  $J$  = 8.0 Hz, 1H), 7.34 - 7.32 (m, 1H), 7.18 - 7.12 (m, 3H), 6.19 - 6.13 (m, 1H), 5.92 (s, 1H), 5.38 - 5.35 (m, 1H), 5.12 - 5.09 (m, 1H), 2.49 (s, 3H), 1.76 (d,  $J$  = 10.6 Hz, 1H), 1.69 - 1.65 (m, 1H), 1.59 (s, 1H), 1.52 (d,  $J$  = 11.5 Hz, 2H), 1.41 (d,  $J$  = 11.0 Hz, 1H), 1.02 - 0.87 (m, 5H);  $^{13}C$  NMR (126 MHz,  $CDCl_3$ )  $\delta$  154.0, 148.5, 139.5, 139.0, 138.8, 137.1, 130.2, 122.9, 122.4, 122.3, 120.5, 119.0, 113.6, 111.9, 109.6, 77.7, 46.3, 28.7, 26.9, 26.7, 26.6, 26.6, 11.5; HR-MS [ESI-MS(+)] calcd for  $[M + H - H_2O]^+$ :  $C_{23}H_{25}N_2$ : 329.2012, found: 329.2005; IR (KBr): 3699, 3632, 2926, 2853, 1654, 1588, 1467, 1437, 1351, 1301, 1210, 930, 741  $cm^{-1}$ .

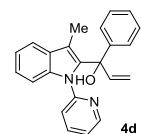

**1-(3-Methyl-1-(pyridin-2-yl)-1H-indol-2-yl)-1-phenylprop-2-en-1-ol (4d)**: white solid; m.p. 138.2 - 139.5 °C; 100.0 mg, 30% yield;  $^1H$  NMR (500 MHz,  $CDCl_3$ )  $\delta$  8.34 (d,  $J$  = 4.5 Hz, 1H), 7.77 (s, 1H), 7.65 (d,  $J$  = 7.2 Hz, 1H), 7.52 (t,  $J$  = 7.6 Hz, 1H), 7.21 - 7.13 (m, 3H), 7.10 (d,  $J$  = 7.5 Hz, 2H), 7.05 - 7.01 (m, 1H), 7.00 - 6.89 (m, 4H), 6.43 - 6.38 (m, 1H), 5.44 (d,  $J$  = 17.0 Hz, 1H), 5.09 (d,  $J$  = 10.5 Hz, 1H), 2.47 (s, 3H);  $^{13}C$  NMR (126 MHz,  $CDCl_3$ )  $\delta$  152.5, 147.7, 146.3, 143.4, 138.8, 138.6, 136.5, 130.0, 127.5, 126.1, 125.6, 123.4, 122.1, 121.6, 120.7, 119.5, 113.5, 111.6, 109.5, 76.4, 11.1; HR-MS [ESI-MS(+)] calcd for  $[M + H - H_2O]^+$ :  $C_{23}H_{19}N_2$ : 323.1543, found: 323.1535; IR (KBr): 3632, 3597, 2928, 1654, 1617, 1577, 1560, 1438, 1122, 744  $cm^{-1}$ .

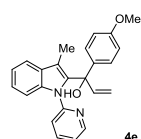

**1-(4-Methoxyphenyl)-1-(3-methyl-1-(pyridin-2-yl)-1H-indol-2-yl)prop-2-en-1-ol (4e)**: yellow oil; 110.0 mg, 30% yield;  $^1H$  NMR (400 MHz,  $CDCl_3$ )  $\delta$  8.39 - 8.38 (m, 1H), 7.78 (d,  $J$  = 1.0 Hz, 1H), 7.69 - 7.59 (m, 2H), 7.23 - 7.19 (m, 3H), 7.11 - 7.03 (m, 4H), 6.56 (d,  $J$  = 8.8 Hz, 2H), 6.44 - 6.41 (m, 1H), 5.42 - 5.37 (m, 1H), 5.10 -

5.07 (m, 1H), 3.70 (s, 3H), 2.46 (s, 3H);  $^{13}\text{C}$  NMR (101 MHz,  $\text{CDCl}_3$ )  $\delta$  157.9, 152.6, 147.6, 143.6, 139.0, 138.6, 138.4, 136.6, 130.0, 126.9, 123.4, 122.0, 121.6, 120.6, 119.4, 113.3, 113.0, 111.3, 109.5, 76.0, 55.2, 11.0; HR-MS [ESI-MS(+)] calcd for  $[\text{M} + \text{H} - \text{H}_2\text{O}]^+$ :  $\text{C}_{24}\text{H}_{21}\text{N}_2\text{O}$ : 353.1648, found: 353.1646; IR (KBr): 3239, 3056, 2925, 2834, 1591, 1506, 1473, 1457, 1438, 1359, 1300, 1246, 1169, 1034, 921, 833, 774, 741  $\text{cm}^{-1}$ .

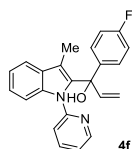

**1-(4-Fluorophenyl)-1-(3-methyl-1-(pyridin-2-yl)-1H-indol-2-yl)prop-2-en-1-ol (4f):**

yellow solid; m.p. 123.7 – 125.8  $^{\circ}\text{C}$ ; 133.0 mg, 37% yield;  $^1\text{H}$  NMR (400 MHz,  $\text{CDCl}_3$ )  $\delta$  8.40 – 8.36 (m, 1H), 7.86 (d,  $J$  = 1.2 Hz, 1H), 7.71 – 7.60 (m, 2H), 7.26 – 7.20 (m, 3H), 7.14 – 7.04 (m, 4H), 6.74 – 6.66 (m, 2H), 6.45 – 6.38 (m, 1H), 5.46 – 5.41 (m, 1H), 5.15 – 5.12 (m, 1H), 2.50 (s, 3H);  $^{13}\text{C}$  NMR (101 MHz,  $\text{CDCl}_3$ )  $\delta$  161.2 (d,  $J$  = 246.4 Hz,  $^1J_{\text{CF}}$ ), 152.4, 147.7, 143.3, 142.1 (d,  $J$  = 3.0 Hz,  $^3J_{\text{CF}}$ ), 138.7, 138.5, 136.5, 130.0, 127.4 (d,  $J$  = 8.1 Hz,  $^3J_{\text{CF}}$ ), 123.6, 121.9, 121.7, 120.8, 119.5, 114.3 (d,  $J$  = 21.2 Hz,  $^2J_{\text{CF}}$ ), 113.6, 111.9, 109.6, 76.0, 11.1; HR-MS [ESI-MS(+)] calcd for  $[\text{M} + \text{H} - \text{H}_2\text{O}]^+$ :  $\text{C}_{23}\text{H}_{18}\text{FN}_2$ : 341.1449, found: 341.1444; IR (KBr): 3661, 3632, 2925, 1734, 1685, 1654, 1629, 1437, 1351, 1217, 1148, 905, 840, 741  $\text{cm}^{-1}$ .

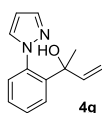

**2-(2-(1H-Pyrazol-1-yl)phenyl)but-3-en-2-ol (4g):**

yellow oil; 164 mg, 77% yield;  $^1\text{H}$  NMR (400 MHz,  $\text{CDCl}_3$ )  $\delta$  7.75 – 7.66 (m, 2H), 7.59 (d,  $J$  = 2.0 Hz, 1H), 7.47 – 7.37 (m, 2H), 7.28 – 7.25 (m, 1H), 6.81 (s, 1H), 6.43 (t,  $J$  = 2.1 Hz, 1H), 5.75 (dd,  $J$  = 17.3, 10.7 Hz, 1H), 4.88 (dd,  $J$  = 17.3, 1.0 Hz, 1H), 4.61 (dd,  $J$  = 10.7, 1.1 Hz, 1H), 1.59 (s, 3H);  $^{13}\text{C}$  NMR (101 MHz,  $\text{CDCl}_3$ )  $\delta$  143.7, 141.5, 139.7, 139.40, 131.3, 128.7, 128.4, 127.8, 127.2, 110.1, 107.3, 73.2, 28.3; HR-MS [ESI-MS(+)] calcd for  $[\text{M} + \text{H} - \text{H}_2\text{O}]^+$ :  $\text{C}_{13}\text{H}_{13}\text{N}_2$ : 197.1073, found: 197.1075; IR (KBr): 2982, 2929, 1518, 1493, 1451, 1396, 1325, 1195, 1107, 1053, 925, 761,  $\text{cm}^{-1}$ .

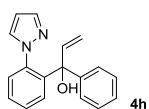

**1-(2-(1H-Pyrazol-1-yl)phenyl)-1-phenylprop-2-en-1-ol (4h):**

yellow oil; 180.0 mg, 65% yield;  $^1\text{H}$  NMR (500 MHz,  $\text{CDCl}_3$ )  $\delta$  7.71 – 7.67 (m, 1H), 7.48 (d,  $J$  = 1.5 Hz, 1H), 7.44 – 7.37 (m, 2H), 7.33 (s, 1H), 7.21 – 7.17 (m, 1H), 7.08 – 6.98 (m, 6H), 6.20 (dd,  $J$  = 17.0, 10.6 Hz, 1H), 6.02 (t,  $J$  = 1.9 Hz, 1H), 5.36 (d,  $J$  = 17.0 Hz, 1H), 5.13 (d,  $J$  = 10.6 Hz, 1H);  $^{13}\text{C}$  NMR (126 MHz,  $\text{CDCl}_3$ )  $\delta$  145.6, 142.8, 142.6, 139.6, 139.4, 130.9, 130.2, 128.6, 128.5, 127.5, 127.4, 126.1, 125.0, 112.7, 107.0, 78.0; HR-MS [ESI-MS(+)] calcd for  $[\text{M} + \text{H} - \text{H}_2\text{O}]^+$ :  $\text{C}_{18}\text{H}_{15}\text{N}_2$ : 259.1230, found: 259.1234; IR (KBr): 3061, 3022, 1518, 1490, 1451, 1396, 1326, 1194, 1051, 944, 922, 763, 703  $\text{cm}^{-1}$ .

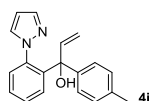

**1-(2-(1H-Pyrazol-1-yl)phenyl)-1-(p-tolyl)prop-2-en-1-ol (4i):**

white solid; m.p. 103.0 – 106.2  $^{\circ}\text{C}$ ; 200 mg, 69% yield;  $^1\text{H}$  NMR (500 MHz,  $\text{CDCl}_3$ )  $\delta$  7.64 – 7.61 (m, 1H), 7.47 (s, 1H), 7.40 – 7.34 (m, 2H), 7.29 (s, 1H), 7.18 (d,  $J$  = 7.8 Hz, 1H), 7.10 (d,  $J$  = 2.2 Hz, 1H), 6.97 (d,  $J$  = 8.0 Hz, 2H), 6.87 (d,  $J$  = 8.0 Hz, 2H), 6.17 (dd,  $J$  = 17.0, 10.6 Hz, 1H), 6.04 (s, 1H), 5.31 (d,  $J$  = 17.0 Hz, 1H), 5.07 (d,  $J$  = 10.6 Hz, 1H), 2.20 (s, 3H);  $^{13}\text{C}$  NMR (126 MHz,  $\text{CDCl}_3$ )  $\delta$  143.0, 142.7, 142.6, 139.6, 139.4, 135.6, 131.0, 130.2, 128.6, 128.5, 128.2, 127.4, 125.1, 112.3, 107.0, 77.9, 21.0; HR-MS [ESI-MS(+)] calcd for  $[\text{M} + \text{H} - \text{H}_2\text{O}]^+$ :  $\text{C}_{19}\text{H}_{17}\text{N}_2$ : 273.1386, found: 273.1399; IR (KBr): 3253, 3104, 2920, 1508, 1427, 1397, 1326, 1185, 1104, 1052, 994, 922, 818, 761  $\text{cm}^{-1}$ .

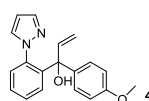

**1-(2-(1H-Pyrazol-1-yl)phenyl)-1-(4-methoxyphenyl)prop-2-en-1-ol (4j):**

white solid; m.p. 147.8 – 149.6  $^{\circ}\text{C}$ ; 202 mg, 66% yield;  $^1\text{H}$  NMR (400 MHz,  $\text{CDCl}_3$ )  $\delta$  7.68 – 7.64 (m, 1H), 7.54 (d,  $J$  = 1.6 Hz, 1H), 7.46 – 7.40 (m, 2H), 7.36 (d,  $J$  = 1.1 Hz, 1H), 7.25 – 7.21 (m, 1H), 7.16 (d,  $J$  = 2.2 Hz, 1H), 7.07 – 7.03 (m, 2H), 6.68 – 6.63 (m, 2H), 6.25 – 6.17 (m, 1H), 6.11 (t,  $J$  = 2.2 Hz, 1H), 5.31 (dd,  $J$  = 17.1, 1.5 Hz, 1H), 5.11 (dd,  $J$  = 10.5,

1.5 Hz, 1H), 3.74 (s, 3H);  $^{13}\text{C}$  NMR (101 MHz,  $\text{CDCl}_3$ )  $\delta$  157.9, 143.0, 142.7, 139.6, 139.4, 137.7, 131.0, 130.3, 128.6, 128.5, 127.4, 126.3, 113.0, 112.3, 107.1, 77.7, 55.2; HR-MS [ESI-MS(+)] calcd for  $[\text{M} + \text{H} - \text{H}_2\text{O}]^+$ :  $\text{C}_{19}\text{H}_{17}\text{N}_2\text{O}$ : 289.1335, found: 289.1340; IR (KBr): 3242, 3114, 2842, 1607, 1508, 1453, 1395, 1295, 1249, 1172, 1108, 1052, 1028, 997, 944, 922, 832, 769, 673  $\text{cm}^{-1}$ .

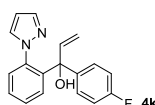

**1-(2-(1H-Pyrazol-1-yl)phenyl)-1-(4-fluorophenyl)prop-2-en-1-ol (4k):** white solid; m.p. 134.3 – 139.0  $^{\circ}\text{C}$ ; 220.0 mg, 75% yield;  $^1\text{H}$  NMR (500 MHz,  $\text{CDCl}_3$ )  $\delta$  7.70 – 7.65 (m, 1H), 7.49 (s, 1H), 7.44 – 7.38 (m, 2H), 7.21 (d,  $J = 7.2$  Hz, 1H), 7.10 (d,  $J = 2.1$  Hz, 1H), 7.06 – 7.03 (m, 2H), 6.74 (t,  $J = 8.6$  Hz, 2H), 6.20 – 6.07 (m, 1H), 6.07 (s, 1H), 5.33 (d,  $J = 17.0$  Hz, 1H), 5.14 (d,  $J = 10.6$  Hz, 1H);  $^{13}\text{C}$  NMR (126 MHz,  $\text{CDCl}_3$ )  $\delta$  161.3 (d,  $J = 244.4$  Hz,  $^1J_{\text{CF}}$ ), 142.7, 142.3, 141.5 (d,  $J = 3.8$  Hz,  $^3J_{\text{CF}}$ ), 139.6, 139.3, 130.9, 130.1, 128.7 (d,  $J = 23.9$  Hz,  $^2J_{\text{CF}}$ ), 127.4, 126.7, 126.6, 114.2 (d,  $J = 21.4$  Hz,  $^2J_{\text{CF}}$ ), 112.9, 107.2, 77.7; HR-MS [ESI-MS(+)] calcd for  $[\text{M} + \text{H} - \text{H}_2\text{O}]^+$ :  $\text{C}_{18}\text{H}_{14}\text{FN}_2$ : 277.1136, found: 277.1138; IR (KBr): 3194, 3105, 1597, 1500, 1451, 1399, 1329, 1296, 1208, 1156, 1097, 1055, 994, 925, 837, 764, 714  $\text{cm}^{-1}$ .

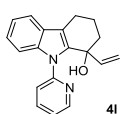

**9-(Pyridin-2-yl)-1-vinyl-2,3,4,9-tetrahydro-1H-carbazol-1-ol (4l):** light yellow solid; m.p. 96.9 – 99.4  $^{\circ}\text{C}$ ; 183.0 mg, 63% yield;  $^1\text{H}$  NMR (400 MHz,  $\text{CDCl}_3$ )  $\delta$  8.47 – 8.47 (m, 1H), 7.92 – 7.88 (m, 1H), 7.64 – 7.57 (m, 2H), 7.51 – 7.49 (m, 1H), 7.29 – 7.21 (m, 3H), 7.09 (d,  $J = 1.3$  Hz, 1H), 5.84 – 5.77 (m, 1H), 4.93 – 4.89 (m, 1H), 4.65 – 4.62 (m, 1H), 2.97 – 2.91 (m, 1H), 2.79 – 2.70 (m, 1H), 2.24 – 2.10 (m, 2H), 1.99 – 1.83 (m, 2H);  $^{13}\text{C}$  NMR (101 MHz,  $\text{CDCl}_3$ )  $\delta$  152.0, 147.9, 144.1, 139.0, 138.3, 136.2, 128.2, 123.3, 121.3, 121.0, 119.7, 119.4, 116.2, 112.3, 110.0, 70.1, 39.6, 21.9, 19.6; HR-MS [ESI-MS(+)] calcd for  $[\text{M} + \text{H} - \text{H}_2\text{O}]^+$ :  $\text{C}_{19}\text{H}_{17}\text{N}_2$ : 273.1386, found: 273.1383; IR (KBr): 3282, 2925, 2850, 1592, 1477, 1444, 1374, 1341, 1307, 1117, 991, 968, 927, 775, 740  $\text{cm}^{-1}$ .

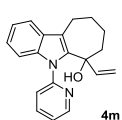

**5-(Pyridin-2-yl)-6-vinyl-5,6,7,8,9,10-hexahydrocyclohepta[b]indol-6-ol (4m):** white solid; m.p. 78.2 – 82.5  $^{\circ}\text{C}$ ; 216.0 mg, 71% yield;  $^1\text{H}$  NMR (400 MHz,  $\text{CDCl}_3$ )  $\delta$  8.52 – 8.48 (m, 1H), 7.90 – 7.86 (m, 1H), 7.69 – 7.64 (m, 1H), 7.50 (d,  $J = 8.1$  Hz, 1H), 7.42 – 7.33 (m, 2H), 7.30 – 7.20 (m, 3H), 5.86 – 5.79 (m, 1H), 4.75 (d,  $J = 17.4$  Hz, 1H), 4.55 (d,  $J = 10.7$  Hz, 1H), 3.11 – 3.05 (m, 1H), 2.96 – 2.89 (m, 1H), 2.20 – 2.13 (m, 3H), 2.10 – 2.05 (m, 1H), 2.00 – 1.91 (m, 1H), 1.81 – 1.76 (m, 1H);  $^{13}\text{C}$  NMR (101 MHz,  $\text{CDCl}_3$ )  $\delta$  152.9, 147.8, 144.9, 139.8, 139.0, 136.4, 129.0, 123.0, 121.8, 121.3, 120.8, 119.2, 119.1, 111.5, 109.9, 74.6, 37.7, 25.8, 20.8, 20.5; HR-MS [ESI-MS(+)] calcd for  $[\text{M} + \text{H} - \text{H}_2\text{O}]^+$ :  $\text{C}_{20}\text{H}_{19}\text{N}_2$ : 287.1543, found: 287.1539; IR (KBr): 3725, 3630, 3052, 2929, 2857, 1590, 1569, 1473, 1456, 1439, 1355, 1310, 1222, 1150, 1127, 989, 915, 776, 740  $\text{cm}^{-1}$ .

## Method E:

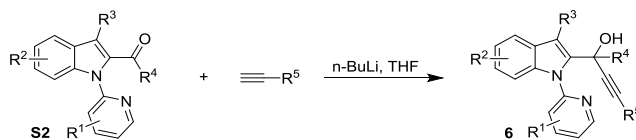

**Synthetic procedure of substituted  $\alpha$ -(2-indolyl)propargyl alcohols 6** <sup>[4]</sup>: To a solution of alkynes (2.0 mmol, 2.0 eq.) in anhydrous THF (10 mL) at  $-78^{\circ}\text{C}$  under Ar atmosphere was added  $n\text{-BuLi}$  (1.6 M, 1.3 mL, 2.0 eq.) dropwise. Then the reaction was stirred at room temperature for 1 h. After cooling to  $-78^{\circ}\text{C}$ , aldehydes (1.0 mmol, 1.0 eq.) in THF (5 mL) was added to the mixture dropwise. The reaction mixture was warmed up to room temperature gradually, and was stirred overnight. The reaction was quenched with aqueous  $\text{NH}_4\text{Cl}$ . The mixture was extracted with EtOAc (10 mL  $\times$  3). The combined organic phases were washed with brine and dried over

anhydrous Na<sub>2</sub>SO<sub>4</sub>, then concentrated under reduced pressure. The residue was purified by column chromatography to give the desired products **6**.

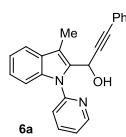

**1-(3-Methyl-1-(pyridin-2-yl)-1H-indol-2-yl)-3-phenylprop-2-yn-1-ol (6a):** yellow oil; 253.0 mg, 75% yield; <sup>1</sup>H NMR (400 MHz, CDCl<sub>3</sub>) δ 8.64 – 8.62 (m, 1H), 7.99 – 7.95 (m, 1H), 7.75 – 7.66 (m, 2H), 7.58 (d, *J* = 7.8 Hz, 1H), 7.50 (d, *J* = 11.0 Hz, 1H), 7.35 – 7.16 (m, 6H), 6.99 (d, *J* = 7.1 Hz, 2H), 6.02 (d, *J* = 11.0 Hz, 1H), 2.53 (s, 3H); <sup>13</sup>C NMR (101 MHz, CDCl<sub>3</sub>) δ 152.2, 148.4, 139.2, 135.9, 135.5, 131.5, 129.5, 128.2, 128.0, 123.9, 122.6, 121.5, 121.2, 120.0, 119.7, 112.6, 110.1, 88.3, 85.1, 56.0, 9.1; HR-MS [ESI-MS(+)] calcd for [M + H]<sup>+</sup>: C<sub>23</sub>H<sub>19</sub>N<sub>2</sub>O: 339.1492, found: 339.1489; IR (KBr): 3286, 3080, 2916, 2200, 1591, 1473, 1440, 1362, 1219, 1150, 1092, 1010, 963, 775, 739 cm<sup>-1</sup>.

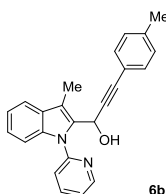

**1-(3-Methyl-1-(pyridin-2-yl)-1H-indol-2-yl)-3-(p-tolyl)prop-2-yn-1-ol (6b):** yellow solid; m.p. 118.1 - 119.7 °C; 244.0 mg, 69% yield; <sup>1</sup>H NMR (400 MHz, CDCl<sub>3</sub>) δ 8.64 – 8.62 (m, 1H), 7.98 – 7.94 (m, 1H), 7.76 – 7.65 (m, 2H), 7.58 (d, *J* = 7.8 Hz, 1H), 7.48 (d, *J* = 11.0 Hz, 1H), 7.34 – 7.25 (m, 3H), 7.00 (d, *J* = 8.2 Hz, 2H), 6.89 (d, *J* = 8.0 Hz, 2H), 6.02 (d, *J* = 11.0 Hz, 1H), 2.53 (s, 3H), 2.31 (s, 3H); <sup>13</sup>C NMR (101 MHz, CDCl<sub>3</sub>) δ 152.2, 148.4, 139.2, 138.3, 135.9, 135.6, 131.4, 129.5, 128.8, 123.8, 121.5, 121.2, 120.0, 119.7, 119.5, 112.5, 110.1, 87.6, 85.2, 56.1, 21.4, 9.0; HR-MS [ESI-MS(+)] calcd for [M + H – H<sub>2</sub>O]<sup>+</sup>: C<sub>24</sub>H<sub>19</sub>N<sub>2</sub>: 335.1543, found: 335.1531; IR (KBr): 3247, 3078, 2911, 2210, 1588, 1474, 1438, 1362, 1091, 1006, 962, 817, 780, 740 cm<sup>-1</sup>.

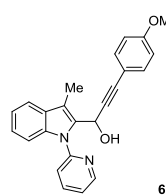

**1-(3-Methyl-1-(pyridin-2-yl)-1H-indol-2-yl)-3-(4-methoxyphenyl)prop-2-yn-1-ol (6c):** yellow oil; 121.0 mg, 33% yield; <sup>1</sup>H NMR (400 MHz, CDCl<sub>3</sub>) δ 8.63 (d, *J* = 3.6 Hz, 1H), 7.99 – 7.95 (m, 1H), 7.72 (d, *J* = 8.1 Hz, 1H), 7.66 (d, *J* = 7.4 Hz, 1H), 7.56 (d, *J* = 8.0 Hz, 1H), 7.42 (d, *J* = 11.0 Hz, 1H), 7.34 – 7.24 (m, 3H), 6.89 (d, *J* = 8.7 Hz, 2H), 6.70 (d, *J* = 8.7 Hz, 2H), 5.96 (d, *J* = 10.9 Hz, 1H), 3.77 (s, 3H), 2.50 (s, 3H); <sup>13</sup>C NMR (101 MHz, CDCl<sub>3</sub>) δ 159.4, 152.2, 148.4, 139.1, 135.9, 135.6, 132.9, 129.5, 123.7, 121.4, 121.1, 119.9, 119.6, 114.6, 113.6, 112.5, 110.0, 86.8, 84.9, 56.0, 55.2, 9.0; HR-MS [ESI-MS(+)] calcd for [M + H – H<sub>2</sub>O]<sup>+</sup>: C<sub>24</sub>H<sub>19</sub>N<sub>2</sub>O: 351.1492, found: 351.1486; IR (KBr): 3242, 3054, 2921, 2836, 2201, 1591, 1508, 1474, 1455, 1439, 1364, 1287, 1247, 1172, 1031, 966, 832, 779, 741 cm<sup>-1</sup>.

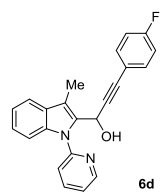

**1-(3-Methyl-1-(pyridin-2-yl)-1H-indol-2-yl)-3-(4-fluorophenyl)prop-2-yn-1-ol (6d):** brown solid; m.p. 113.9 - 114.9 °C; 192.0 mg, 54% yield; <sup>1</sup>H NMR (500 MHz, CDCl<sub>3</sub>) δ 8.59 – 8.54 (m, 1H), 7.92 – 7.89 (m, 1H), 7.66 (d, *J* = 8.1 Hz, 1H), 7.62 (d, *J* = 7.5 Hz, 1H), 7.51 (d, *J* = 8.2 Hz, 1H), 7.42 (d, *J* = 11.0 Hz, 1H), 7.27 – 7.20 (m, 3H), 6.93 – 6.86 (m, 2H), 6.82 (t, *J* = 8.7 Hz, 2H), 5.93 (d, *J* = 11.0 Hz, 1H), 2.45 (s, 3H); <sup>13</sup>C NMR (126 MHz, CDCl<sub>3</sub>) δ 162.3 (d, *J* = 250.7, <sup>1</sup>*J*<sub>CF</sub>), 152.2, 148.4, 139.2, 135.9, 135.3, 133.3 (d, *J* = 7.6 Hz, <sup>3</sup>*J*<sub>CF</sub>), 129.5, 123.9, 121.4, 121.3, 120.0, 119.6, 118.6 (d, *J* = 2.5 Hz, <sup>3</sup>*J*<sub>CF</sub>), 115.3 (d, *J* = 22.7 Hz, <sup>2</sup>*J*<sub>CF</sub>), 112.7, 110.1, 88.0, 84.0, 55.9, 9.0; HR-MS [ESI-MS(+)] calcd for [M + H]<sup>+</sup>: C<sub>23</sub>H<sub>18</sub>FN<sub>2</sub>O: 357.1398, found: 357.1397; IR (KBr): 3056, 2953, 2923, 2854, 2220, 1591, 1506, 1474, 1455, 1439, 1364, 1232, 1154, 1093, 1014, 967, 835, 779, 741 cm<sup>-1</sup>.

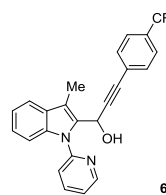

**1-(3-Methyl-1-(pyridin-2-yl)-1H-indol-2-yl)-3-(4-(trifluoromethyl)phenyl)prop-2-yn-1-ol (6e):** yellow oil; 210.0 mg, 52% yield; <sup>1</sup>H NMR (500 MHz, CDCl<sub>3</sub>) δ 8.65 – 8.57 (m, 1H), 7.96 – 7.93 (m, 1H), 7.69 (d, *J* = 8.1 Hz, 1H), 7.64 (d, *J* = 7.7 Hz, 1H), 7.54 (d, *J* = 8.2 Hz, 1H), 7.47 (d, *J* = 11.0 Hz, 1H), 7.40 (d, *J* = 8.2 Hz, 2H), 7.32 – 7.22 (m, 3H), 7.02 (d, *J* = 8.1 Hz, 2H), 5.95 (d, *J* = 10.9 Hz, 1H),

2.47 (s, 3H);  $^{13}\text{C}$  NMR (126 MHz,  $\text{CDCl}_3$ )  $\delta$  152.1, 148.4, 139.2, 135.9, 134.9, 131.6, 129.9 (d,  $J = 7.6$  Hz,  $^3J_{\text{CF}}$ ), 129.4, 126.3, 125.0 (q,  $J = 3.8$  Hz,  $^3J_{\text{CF}}$ ), 122.7, 124.0, 121.4, 121.3, 120.03, 119.5, 113.0, 110.1, 90.8, 83.6, 55.9, 9.0; HR-MS [ESI-MS(+)] calcd for  $[\text{M} + \text{H}]^+$ :  $\text{C}_{24}\text{H}_{18}\text{F}_3\text{N}_2\text{O}$ : 407.1366, found: 407.1370; IR (KBr): 3715, 3060, 2924, 1507, 1473, 1455, 1324, 1166, 1125, 1067, 1017, 842, 742  $\text{cm}^{-1}$ .

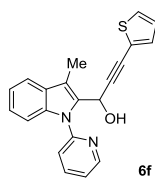

**1-(3-Methyl-1-(pyridin-2-yl)-1H-indol-2-yl)-3-(thiophen-2-yl)prop-2-yn-1-ol (6f)**: brown solid; m.p. 65.7 - 67.2  $^{\circ}\text{C}$ ; 130.0 mg, 38% yield;  $^1\text{H}$  NMR (400 MHz,  $\text{CDCl}_3$ )  $\delta$  8.62 – 8.61 (m, 1H), 8.02 – 7.98 (m, 1H), 7.72 (d,  $J = 8.1$  Hz, 1H), 7.66 (d,  $J = 7.2$  Hz, 1H), 7.56 (d,  $J = 7.9$  Hz, 1H), 7.45 (d,  $J = 11.1$  Hz, 1H), 7.37 – 7.31 (m, 1H), 7.30 – 7.24 (m, 2H), 7.13 – 7.12 (m, 1H), 6.92 – 6.75 (m, 2H), 5.97 (d,  $J = 11.0$  Hz, 1H), 2.49 (s, 3H);  $^{13}\text{C}$  NMR (101 MHz,  $\text{CDCl}_3$ )  $\delta$  152.1, 148.3, 139.3, 135.9, 135.2, 131.9, 129.4, 127.0, 126.7, 123.9, 122.4, 121.6, 121.2, 120.0, 119.7, 112.6, 110.0, 92.1, 78.3, 56.1, 9.0; HR-MS [ESI-MS(+)] calcd for  $[\text{M} + \text{H}]^+$ :  $\text{C}_{21}\text{H}_{17}\text{N}_2\text{OS}$ : 345.1056, found: 345.1055; IR (KBr): 3725, 3071, 2922, 1654, 1589, 1504, 1474, 1438, 1364, 1323, 1265, 1153, 1011, 850, 742, 705  $\text{cm}^{-1}$ .

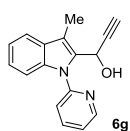

**1-(3-Methyl-1-(pyridin-2-yl)-1H-indol-2-yl)prop-2-yn-1-ol (6g)**: brown solid; m.p. 145.0 - 146.2  $^{\circ}\text{C}$ ; 126.0 mg, 48% yield;  $^1\text{H}$  NMR (500 MHz,  $\text{CDCl}_3$ )  $\delta$  8.54 (d,  $J = 4.7$  Hz, 1H), 7.94 (t,  $J = 7.7$  Hz, 1H), 7.65 – 7.61 (m, 2H), 7.52 (d,  $J = 8.2$  Hz, 1H), 7.43 (d,  $J = 11.0$  Hz, 1H), 7.31 – 7.29 (m, 1H), 7.27 – 7.19 (m, 2H), 5.76 – 5.73 (m, 1H), 2.43 (s, 3H), 2.04 (d,  $J = 2.2$  Hz, 1H);  $^{13}\text{C}$  NMR (126 MHz,  $\text{CDCl}_3$ )  $\delta$  151.9, 148.1, 139.2, 135.8, 134.8, 129.4, 123.9, 121.5, 121.2, 120.0, 119.6, 112.8, 110.1, 82.6, 72.7, 55.3, 9.0; HR-MS [ESI-MS(+)] calcd for  $[\text{M} + \text{H}]^+$ :  $\text{C}_{17}\text{H}_{15}\text{N}_2\text{O}$ : 263.1179, found: 263.1170; IR (KBr): 3555, 3288, 2922, 1591, 1474, 1455, 1439, 1363, 1319, 1283, 1093, 1017, 778, 740  $\text{cm}^{-1}$ .

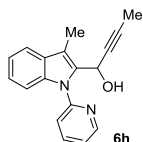

**1-(3-Methyl-1-(pyridin-2-yl)-1H-indol-2-yl)but-2-yn-1-ol (6h)**: yellow solid; m.p. 135.3 – 138.0  $^{\circ}\text{C}$ ; 192.3 mg, 70% yield;  $^1\text{H}$  NMR (400 MHz,  $\text{CDCl}_3$ )  $\delta$  8.59 (dd,  $J = 5.0, 1.2$  Hz, 1H), 7.99 – 7.94 (m, 1H), 7.69 – 7.61 (m, 2H), 7.53 (d,  $J = 7.6$  Hz, 1H), 7.33 – 7.21 (m, 4H), 5.72 (dd,  $J = 10.8, 2.2$  Hz, 1H), 2.46 (s, 3H), 1.45 (d,  $J = 2.3$  Hz, 3H);  $^{13}\text{C}$  NMR (101 MHz,  $\text{CDCl}_3$ )  $\delta$  152.2, 148.4, 139.0, 135.9, 135.8, 129.4, 123.7, 121.4, 121.1, 119.9, 119.7, 112.1, 110.0, 81.4, 78.3, 55.7, 8.9, 3.3; HR-MS [ESI-MS(+)] calcd for  $[\text{M} + \text{H} - \text{H}_2\text{O}]^+$ :  $\text{C}_{18}\text{H}_{15}\text{N}_2$ : 259.1230, found: 259.1231; IR (KBr): 3251, 3057, 2919, 1592, 1474, 1441, 1364, 1231, 1146, 1091, 997, 916, 742  $\text{cm}^{-1}$ .

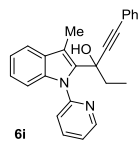

**3-(3-Methyl-1-(pyridin-2-yl)-1H-indol-2-yl)-1-phenylpent-1-yn-3-ol (6i)**: brown oil; 120.0 mg, 33% yield;  $^1\text{H}$  NMR (400 MHz,  $\text{CDCl}_3$ )  $\delta$  8.63 – 8.62 (m, 1H), 7.92 – 7.87 (m, 1H), 7.75 – 7.68 (m, 2H), 7.64 (d,  $J = 8.1$  Hz, 1H), 7.37 – 7.30 (m, 2H), 7.27 – 7.17 (m, 5H), 7.05 – 7.03 (m, 2H), 2.66 (s, 3H), 2.58 – 2.46 (m, 2H), 1.33 (d,  $J = 7.2$  Hz, 3H);  $^{13}\text{C}$  NMR (101 MHz,  $\text{CDCl}_3$ )  $\delta$  153.4, 148.4, 139.1, 137.4, 136.6, 131.4, 130.2, 128.0, 127.9, 123.5, 122.8, 122.0, 121.9, 120.8, 119.5, 110.8, 109.8, 91.5, 85.7, 69.9, 34.2, 11.0, 9.7; HR-MS [ESI-MS(+)] calcd for  $[\text{M} + \text{H}]^+$ :  $\text{C}_{25}\text{H}_{23}\text{N}_2\text{O}$ : 367.1805, found: 367.1801; IR (KBr): 3280, 3055, 2970, 2928, 1664, 1584, 1534, 1457, 1381, 1276, 1145, 1008, 924, 740, 700  $\text{cm}^{-1}$ .

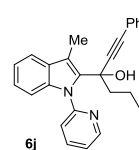

**3-(3-Methyl-1-(pyridin-2-yl)-1H-indol-2-yl)-1-phenylhex-1-yn-3-ol (6j)**: brown solid; m.p. 130.3 - 132.6  $^{\circ}\text{C}$ ; 155.0 mg, 41% yield;  $^1\text{H}$  NMR (500 MHz,  $\text{CDCl}_3$ )  $\delta$  8.57 (d,  $J = 4.7$  Hz, 1H), 7.87 – 7.80 (m, 1H), 7.65 – 7.63 (m, 1H), 7.58 (d,  $J = 8.2$  Hz, 2H), 7.30 – 7.25 (m, 2H), 7.22 – 7.14 (m, 5H), 7.00 (d,  $J = 7.2$  Hz, 2H), 2.61 (s, 3H), 2.45 – 2.31 (m, 2H), 1.88 – 1.81 (m, 1H), 1.72 – 1.65 (m, 1H), 1.05 (t,  $J = 7.4$  Hz, 3H);  $^{13}\text{C}$

NMR (126 MHz, CDCl<sub>3</sub>)  $\delta$  153.4, 148.4, 139.1, 137.5, 136.6, 131.4, 130.2, 127.9, 127.9, 123.5, 122.8, 122.0, 121.9, 120.8, 119.5, 110.8, 109.7, 91.9, 85.6, 69.4, 43.5, 18.5, 14.3, 11.0; HR-MS [ESI-MS(+)] calcd for [M + H]<sup>+</sup>: C<sub>26</sub>H<sub>25</sub>N<sub>2</sub>O: 381.1961, found: 381.1963; IR (KBr): 3782, 3057, 2958, 2924, 2869, 1654, 1591, 1472, 1458, 1438, 1357, 1313, 1282, 1209, 1147, 967, 756, 741 cm<sup>-1</sup>.

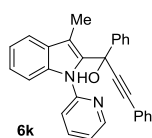

**1-(3-Methyl-1-(pyridin-2-yl)-1H-indol-2-yl)-1,3-diphenylprop-2-yn-1-ol (6k):** yellow oil; 283.0 mg, 68% yield; <sup>1</sup>H NMR (400 MHz, CDCl<sub>3</sub>)  $\delta$  8.60 – 8.58 (m, 1H), 8.38 (s, 1H), 7.84 – 7.75 (m, 3H), 7.62 (d, *J* = 7.3 Hz, 1H), 7.51 (d, *J* = 8.0 Hz, 1H), 7.38 – 7.30 (m, 4H), 7.27 – 7.19 (m, 6H), 7.11 (d, *J* = 7.0 Hz, 2H), 1.85 (s, 3H); <sup>13</sup>C NMR (101 MHz, CDCl<sub>3</sub>)  $\delta$  153.0, 148.1, 143.5, 139.1, 137.7, 136.4, 131.4, 130.0, 128.1, 128.0, 128.0, 127.6, 126.9, 123.8, 122.7, 121.9, 121.7, 120.9, 119.7, 113.3, 109.7, 92.5, 86.3, 69.9, 9.5; HR-MS [ESI-MS(+)] calcd for [M + H]<sup>+</sup>: C<sub>29</sub>H<sub>23</sub>N<sub>2</sub>O: 415.1805, found: 415.1808; IR (KBr): 3240, 3065, 2922, 2856, 1654, 1572, 1534, 1458, 1277, 1147, 1011, 924, 741, 700 cm<sup>-1</sup>.

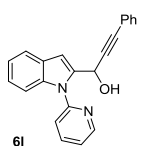

**3-Mhenyl-1-(1-(pyridin-2-yl)-1H-indol-2-yl)prop-2-yn-1-ol (6l):** light yellow oil; 227.0 mg, 70% yield; <sup>1</sup>H NMR (400 MHz, CDCl<sub>3</sub>)  $\delta$  8.64 – 8.63 (m, 1H), 8.02 – 7.97 (m, 1H), 7.76 – 7.70 (m, 2H), 7.59 (d, *J* = 8.3 Hz, 1H), 7.38 – 7.32 (m, 2H), 7.30 – 7.28 (m, 2H), 7.27 – 7.24 (m, 2H), 7.23 (t, *J* = 1.8 Hz, 1H), 7.16 – 7.14 (m, 2H), 6.91 (s, 1H), 5.82 (d, *J* = 8.6 Hz, 1H); <sup>13</sup>C NMR (101 MHz, CDCl<sub>3</sub>)  $\delta$  151.6, 148.5, 140.0, 139.3, 136.8, 131.6, 128.4, 128.3, 128.1, 128.1, 123.6, 121.8, 121.7, 121.7, 119.6, 110.4, 105.7, 87.5, 85.3, 58.7; HR-MS [ESI-MS(+)] calcd for [M + H – H<sub>2</sub>O]<sup>+</sup>: C<sub>22</sub>H<sub>15</sub>N<sub>2</sub>: 307.1230, found: 307.1234; IR (KBr): 3745, 3240, 3057, 2921, 2200, 1593, 1489, 1454, 1439, 1347, 1283, 1213, 1151, 1028, 958, 756, 691 cm<sup>-1</sup>.

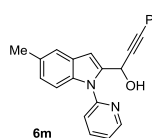

**1-(5-Methyl-1-(pyridin-2-yl)-1H-indol-2-yl)-3-phenylprop-2-yn-1-ol (6m):** yellow oil; 220.0 mg, 65% yield; <sup>1</sup>H NMR (400 MHz, CDCl<sub>3</sub>)  $\delta$  8.62 – 8.60 (m, 1H), 7.99 – 7.95 (m, 1H), 7.72 (d, *J* = 8.2 Hz, 1H), 7.48 (d, *J* = 8.0 Hz, 2H), 7.35 – 7.30 (m, 2H), 7.26 – 7.23 (m, 3H), 7.17 – 7.09 (m, 3H), 6.83 (s, 1H), 5.80 (d, *J* = 8.5 Hz, 1H), 2.49 (s, 3H); <sup>13</sup>C NMR (101 MHz, CDCl<sub>3</sub>)  $\delta$  151.7, 148.4, 140.0, 139.3, 135.1, 131.8, 131.6, 131.1, 128.7, 128.3, 128.1, 125.1, 122.6, 121.6, 121.4, 119.4, 110.1, 105.4, 87.6, 85.2, 58.7, 21.4; HR-MS [ESI-MS(+)] calcd for [M + H – H<sub>2</sub>O]<sup>+</sup>: C<sub>23</sub>H<sub>17</sub>N<sub>2</sub>: 321.1386, found: 321.1378; IR (KBr): 3745, 3252, 3058, 2917, 2202, 1595, 1474, 1440, 1375, 1340, 1305, 1174, 1029, 959, 874, 783, 775, 691 cm<sup>-1</sup>.

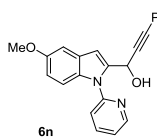

**1-(5-Methoxy-1-(pyridin-2-yl)-1H-indol-2-yl)-3-phenylprop-2-yn-1-ol (6n):** yellow oil; 242.0 mg, 68% yield; <sup>1</sup>H NMR (500 MHz, CDCl<sub>3</sub>)  $\delta$  8.59 (d, *J* = 4.7 Hz, 1H), 7.95 (t, *J* = 7.7 Hz, 1H), 7.68 (d, *J* = 8.1 Hz, 1H), 7.45 (d, *J* = 9.0 Hz, 1H), 7.34 – 7.29 (m, 1H), 7.25 – 7.16 (m, 4H), 7.14 – 7.05 (m, 3H), 6.91 – 6.89 (m, 1H), 6.80 (s, 1H), 5.75 (d, *J* = 8.2 Hz, 1H), 3.87 (s, 3H); <sup>13</sup>C NMR (126 MHz, CDCl<sub>3</sub>)  $\delta$  155.3, 151.6, 148.4, 140.5, 139.3, 131.8, 131.6, 129.1, 128.3, 128.1, 122.5, 121.6, 119.2, 113.4, 111.3, 105.6, 103.3, 87.5, 85.3, 58.7, 55.8; HR-MS [ESI-MS(+)] calcd for [M + H]<sup>+</sup>: C<sub>23</sub>H<sub>19</sub>N<sub>2</sub>O<sub>2</sub>: 355.1441, found: 355.1442; IR (KBr): 3249, 3062, 2927, 2831, 1618, 1596, 1583, 1475, 1449, 1380, 1304, 1280, 1204, 1172, 1031, 758, 692 cm<sup>-1</sup>.

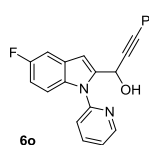

**1-(5-Fluoro-1-(pyridin-2-yl)-1H-indol-2-yl)-3-phenylprop-2-yn-1-ol (6o):** brown oil; 150.0 mg, 44% yield; <sup>1</sup>H NMR (500 MHz, CDCl<sub>3</sub>)  $\delta$  8.60 (d, *J* = 4.8 Hz, 1H), 7.96 (t, *J* = 7.8 Hz, 1H), 7.65 (d, *J* = 8.1 Hz, 1H), 7.46 – 7.44 (m, 1H), 7.36 – 7.28 (m, 2H), 7.25 – 7.18 (m, 3H), 7.11 (d, *J* = 7.3 Hz, 2H), 7.03 (d, *J* = 8.6

Hz, 1H), 7.00 – 6.96 (m, 1H), 6.83 (s, 1H), 5.75 (d,  $J = 8.6$  Hz, 1H);  $^{13}\text{C}$  NMR (126 MHz,  $\text{CDCl}_3$ )  $\delta$  158.7 (d,  $J = 236.9$ ,  $^1J_{\text{CF}}$ ), 151.3, 148.6, 141.5, 139.5, 133.3, 131.8, 131.6, 128.4, 128.1, 122.4, 122.0, 119.5, 111.7 (d,  $J = 25.2$ ,  $^2J_{\text{CF}}$ ), 111.3 (d,  $J = 10.1$ ,  $^3J_{\text{CF}}$ ), 106.6 (d,  $J = 23.9$ ,  $^2J_{\text{CF}}$ ), 105.4 (d,  $J = 5.0$ ,  $^3J_{\text{CF}}$ ), 87.2, 85.5, 58.6; HR-MS [ESI-MS(+)] calcd for  $[\text{M} + \text{H} - \text{H}_2\text{O}]^+$ :  $\text{C}_{22}\text{H}_{14}\text{FN}_2$ : 325.1136, found: 325.1128; IR (KBr): 3745, 3274, 2923, 2200, 1587, 1475, 1450, 1381, 1301, 1174, 1029, 954, 858, 786, 757, 691  $\text{cm}^{-1}$ .

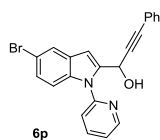

6p

**1-(5-Bromo-1-(pyridin-2-yl)-1H-indol-2-yl)-3-phenylprop-2-yn-1-ol (6p):**

yellow solid; m.p. 155.9 - 157.4 °C; 150.0 mg, 37% yield;  $^1\text{H}$  NMR (400 MHz,  $\text{CDCl}_3$ )  $\delta$  8.66 – 8.63 (m, 1H), 8.03 – 7.99 (m, 1H), 7.81 (d,  $J = 1.8$  Hz, 1H), 7.67 (d,  $J = 8.1$  Hz, 1H), 7.43 – 7.34 (m, 3H), 7.28 – 7.21 (m, 3H), 7.15 – 7.13 (m, 2H), 7.03 (d,  $J = 8.7$  Hz, 1H), 6.83 (s, 1H), 5.79 (d,  $J = 8.6$  Hz, 1H);  $^{13}\text{C}$  NMR (101 MHz,  $\text{CDCl}_3$ )  $\delta$  151.1, 148.7, 141.1, 139.5, 135.5, 131.6, 130.1, 128.4, 128.1, 126.4, 124.2, 122.3, 122.2, 119.6, 114.6, 111.9, 104.9, 87.0, 85.6, 58.6; HR-MS [ESI-MS(+)] calcd for  $[\text{M} + \text{H} - \text{H}_2\text{O}]^+$ :  $\text{C}_{22}\text{H}_{14}\text{BrN}_2$ : 385.0335, found: 385.0329; IR (KBr): 3743, 3264, 3064, 2921, 2854, 2210, 1588, 1473, 1444, 1376, 1339, 1299, 1208, 1143, 1024, 873, 758, 690  $\text{cm}^{-1}$ .

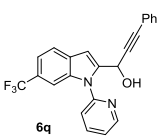

6q

**3-Phenyl-1-(1-(pyridin-2-yl)-6-(trifluoromethyl)-1H-indol-2-yl)prop-2-yn-1-ol (6q):**

light pink solid; m.p. 117.1 - 119.3 °C; 221.0 mg, 56% yield;  $^1\text{H}$  NMR (400 MHz,  $\text{CDCl}_3$ )  $\delta$  8.68 – 8.67 (m, 1H), 8.08 – 8.04 (m, 1H), 7.82 (s, 1H), 7.79 (d,  $J = 8.3$  Hz, 1H), 7.71 (d,  $J = 8.1$  Hz, 1H), 7.49 (d,  $J = 8.3$  Hz, 1H), 7.46 – 7.42 (m, 1H), 7.30 – 7.21 (m, 3H), 7.17 – 7.15 (m, 2H), 6.97 (d,  $J = 8.8$  Hz, 2H), 5.84 (d,  $J = 8.7$  Hz, 1H);  $^{13}\text{C}$  NMR (101 MHz,  $\text{CDCl}_3$ )  $\delta$  150.9, 148.9, 142.7, 139.8, 135.9, 131.6, 130.8, 128.5, 128.2, 124.9 (d,  $J = 272.7$ ,  $^1J_{\text{CF}}$ ), 125.6 (d,  $J = 32.3$ ,  $^2J_{\text{CF}}$ ), 122.6, 122.2, 122.1, 119.7, 118.3 (q,  $J = 3.0$ ,  $^3J_{\text{CF}}$ ), 107.9 (q,  $J = 6.0$ ,  $^3J_{\text{CF}}$ ), 105.4, 86.9, 85.7, 58.6; HR-MS [ESI-MS(+)] calcd for  $[\text{M} + \text{H} - \text{H}_2\text{O}]^+$ :  $\text{C}_{23}\text{H}_{14}\text{F}_3\text{N}_2$ : 375.1104, found: 375.1098; IR (KBr): 3745, 3056, 2923, 1592, 1474, 1440, 1344, 1324, 1304, 1164, 1116, 1050, 1024, 971, 829, 757, 691  $\text{cm}^{-1}$ .

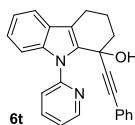

6t

**1-(Phenylethynyl)-9-(pyridin-2-yl)-2,3,4,9-tetrahydro-1H-carbazol-1-ol (6t):**

light yellow solid; m.p. 96.9 - 99.4 °C; 211.0 mg, 56% yield;  $^1\text{H}$  NMR (500 MHz,  $\text{CDCl}_3$ )  $\delta$  8.58 – 8.57 (m, 1H), 7.92 – 7.89 (m, 1H), 7.68 – 7.64 (m, 2H), 7.60 (d,  $J = 7.7$  Hz, 1H), 7.54 (d,  $J = 8.1$  Hz, 1H), 7.28 – 7.20 (m, 3H), 7.18 – 7.10 (m, 3H), 6.92 – 6.85 (m, 2H), 2.93 (d,  $J = 16.1$  Hz, 1H), 2.79 – 2.70 (m, 1H), 2.56 (d,  $J = 13.1$  Hz, 1H), 2.31 – 2.13 (m, 2H), 2.05 – 1.97 (m, 1H);  $^{13}\text{C}$  NMR (126 MHz,  $\text{CDCl}_3$ )  $\delta$  152.1, 148.4, 139.1, 137.1, 136.0, 131.4, 128.1, 127.9, 123.7, 122.7, 121.3, 121.2, 119.7, 119.3, 115.3, 110.1, 92.3, 83.2, 62.8, 39.8, 21.7, 19.4; HR-MS [ESI-MS(+)] calcd for  $[\text{M} + \text{H} - \text{H}_2\text{O}]^+$ :  $\text{C}_{25}\text{H}_{19}\text{N}_2$ : 347.1543, found: 347.1555; IR (KBr): 3281, 3056, 2928, 2840, 1592, 1474, 1443, 1371, 1346, 1263, 1137, 973, 917, 831, 788, 755, 740, 691  $\text{cm}^{-1}$ .

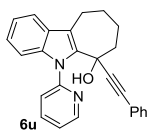

6u

**6-(Phenylethynyl)-5-(pyridin-2-yl)-5,6,7,8,9,10-hexahydrocyclohepta[b]indol-6-ol (6u):**

light yellow oil; 243.0 mg, 64% yield;  $^1\text{H}$  NMR (400 MHz,  $\text{CDCl}_3$ )  $\delta$  8.63 – 8.62 (m, 1H), 8.09 (d,  $J = 1.2$  Hz, 1H), 7.93 – 7.89 (m, 1H), 7.70 – 7.67 (m, 2H), 7.49 – 7.47 (m, 1H), 7.34 – 7.24 (m, 3H), 7.24 – 7.14 (m, 3H), 6.96 – 6.93 (m, 2H), 3.15 – 2.93 (m, 2H), 2.71 – 2.49 (m, 2H), 2.31 – 2.17 (m, 1H), 2.09 – 2.01 (m, 2H), 1.98 – 1.88 (m, 1H);  $^{13}\text{C}$  NMR (101 MHz,  $\text{CDCl}_3$ )  $\delta$  152.9, 148.3, 139.2, 138.5, 136.2, 131.4, 128.8, 127.9, 123.5, 122.7, 121.7, 121.0, 120.9, 119.4, 117.8, 110.0, 92.8, 84.1, 68.0, 37.6, 25.4, 20.6, 20.5; HR-MS [ESI-MS(+)] calcd for  $[\text{M} + \text{H}]^+$ :  $\text{C}_{26}\text{H}_{21}\text{N}_2$ : 361.1699, found: 361.1694; IR (KBr): 3260, 3056, 2931, 2860, 1591, 1570, 1474, 1456, 1440, 1365, 1313, 1021, 1005, 915, 777, 757, 740, 691  $\text{cm}^{-1}$ .



## Method F:

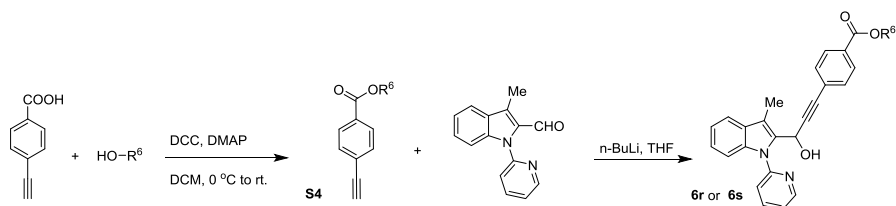

**Synthetic procedure of  $\alpha$ -(2-indolyl)propargyl alcohols **6r** and **6s**:** The following starting materials **S4** were prepared according to the literature procedures<sup>[23]</sup>. To an oven-dried 50 mL flask, 4-ethynylbenzoic acid (6.0 mmol), alcohol (5.5 mmol), DMAP (1.1 mmol) and DCM (30 mL) were added sequentially under Ar at 0 °C. Then DCC (6 mmol) was added and stirred for 10 min at this temperature and stirred at room temperature overnight. The reaction mixture filtered through a short pad of silica gel and washed by DCM. The filtrate was concentrated in vacuo before it was purified by flash chromatography on silica gel to afford the desired compound **S4**. After obtaining **S4**, we also used the **method E** to synthesize **6r** and **6s**.

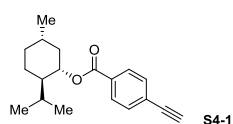

**(1S,2R,5S)-2-isopropyl-5-methylcyclohexyl 4-ethynylbenzoate (S4-1)**<sup>[5]</sup>:

<sup>1</sup>H NMR (400 MHz, CDCl<sub>3</sub>)  $\delta$  8.02 (d,  $J$  = 8.4 Hz, 2H), 7.57 (d,  $J$  = 8.3 Hz, 2H), 4.99 – 4.92 (m, 1H), 3.24 (s, 1H), 2.16 – 2.13 (m, 1H), 2.00 – 1.92 (m, 1H), 1.80 – 1.69 (m, 2H), 1.64 – 1.49 (m, 2H), 1.20 – 1.07 (m, 2H), 0.96 – 0.93 (m, 7H), 0.81 (d,  $J$  = 7.0 Hz, 3H); <sup>13</sup>C NMR (101 MHz, CDCl<sub>3</sub>)  $\delta$  165.4, 132.0, 130.9, 129.4, 126.5, 82.9, 79.9, 75.2, 47.3, 41.0, 34.3, 31.5, 26.5, 23.6, 22.1, 20.8, 16.5;

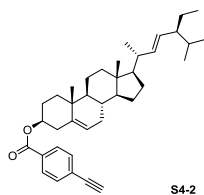

**S4-2**

**(3S,8S,9S,10R,13R,14S,17R)-17-((2R,5S,E)-5-ethyl-6-methylhept-3-en-2-yl)-10,13-dimethyl-2,3,4,7,8,9,10,11,12,13,14,15,16,17-tetradecahydro-1H-cyclopenta[a]phenanthren-3-yl 4-ethynylbenzoate (S4-2)**: white solid; m.p.

158.4 – 161.8 °C; 2.50 g, 84% yield; <sup>1</sup>H NMR (400 MHz, CDCl<sub>3</sub>)  $\delta$  8.01 (d,  $J$  = 8.4 Hz, 2H), 7.56 (d,  $J$  = 8.4 Hz, 2H), 5.44 (d,  $J$  = 4.2 Hz, 1H), 5.22 – 5.16 (m, 1H), 5.08 – 5.02 (m, 1H), 4.93 – 4.81 (m, 1H), 3.24 (s, 1H), 2.48 (d,  $J$  = 7.7 Hz, 2H), 2.10 – 1.92 (m, 5H), 1.80 – 1.70 (m, 2H), 1.63 – 1.42 (m, 8H), 1.37 – 1.12 (m, 6H), 1.09 (s, 3H), 1.05 (d,  $J$  = 6.6 Hz, 5H), 0.88 (d,  $J$  = 6.3 Hz, 3H), 0.85 (s, 1H), 0.83 (d,  $J$  = 6.9 Hz, 5H), 0.73 (s, 3H); <sup>13</sup>C NMR (101 MHz, CDCl<sub>3</sub>)  $\delta$  165.3, 139.5, 138.3, 132.0, 130.9, 129.4, 129.3, 126.5, 122.9, 82.9, 79.9, 74.9, 56.8, 56.0, 51.3, 50.1, 42.2, 40.5, 39.7, 38.2, 37.0, 36.7, 31.9, 31.9, 28.9, 27.9, 25.4, 24.4, 21.3, 21.1, 21.0, 19.4, 19.0, 12.3, 12.1; HR-MS [ESI-MS(+)] calcd for [M + Na]<sup>+</sup>: C<sub>38</sub>H<sub>52</sub>NaO<sub>2</sub>: 563.3860, found: 563.3866; IR (KBr): 3250, 2949, 2864, 2104, 1705, 1605, 1460, 1307, 1269, 1173, 1120, 1106, 1019, 974, 859, 769 cm<sup>-1</sup>.

**(1R,2S,5R)-2-isopropyl-5-methylcyclohexyl 4-(3-hydroxy-3-(3-methyl-1-(pyridin-2-yl)-1H-indol-2-yl)prop-1-yn-1-yl)benzoate (6r)**: brown solid; m.p. 110.7 – 114.6 °C; 140.0 mg, 27% yield; <sup>1</sup>H NMR (400 MHz, CDCl<sub>3</sub>)  $\delta$  8.63 (d,  $J$  = 4.8 Hz, 1H), 7.96 (t,  $J$  = 7.8 Hz, 1H), 7.86 (d,  $J$  = 7.5 Hz, 2H), 7.72 (d,  $J$  = 8.1 Hz, 1H), 7.67 (d,  $J$  = 7.2 Hz, 1H), 7.57 (d,  $J$  = 8.0 Hz, 1H), 7.50 (d,  $J$  = 10.8 Hz, 1H), 7.35 – 7.24 (m, 3H), 7.02 (d,  $J$  = 8.0 Hz, 2H), 6.00 (d,  $J$  = 9.8 Hz, 1H), 4.96 – 4.90 (m, 1H), 2.51 (s, 3H), 2.11 (d,  $J$  = 12.1 Hz, 1H), 1.96 – 1.91 (m, 1H), 1.75 (d,  $J$  = 11.5 Hz, 2H), 1.55 (t,  $J$  = 11.7 Hz, 2H), 1.18 – 1.04 (m, 2H), 0.95 – 0.92 (m, 7H), 0.80 (d,  $J$  = 6.9 Hz, 3H); <sup>13</sup>C NMR (101 MHz, CDCl<sub>3</sub>)  $\delta$  165.5, 152.1, 148.4, 139.2, 135.8, 135.1, 131.3, 130.2, 129.4, 129.1, 127.0, 124.0, 121.5, 121.3, 120.0, 119.6, 112.9, 110.1, 91.2, 84.3, 75.1, 56.0, 47.3, 41.0, 34.3, 31.4, 26.5, 23.6, 22.0, 20.8, 16.5, 9.0; HR-MS [ESI-MS(+)] calcd for [M + H]<sup>+</sup>:

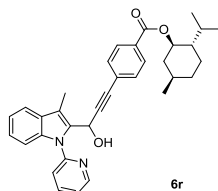

**6r**

C<sub>34</sub>H<sub>37</sub>N<sub>2</sub>O<sub>3</sub>: 521.2799, found: 521.2796; IR (KBr): 2955, 2922, 2857, 1712, 1597, 1505, 1457, 1377, 1273, 1175, 1106, 1018, 965, 745 cm<sup>-1</sup>.

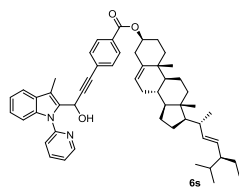

(3*S*,8*S*,9*S*,10*R*,13*R*,14*S*,17*R*)-17-((2*R*,5*S*,*E*)-5-ethyl-6-methylhept-3-en-2-yl)-10,13-dimethyl-2,3,4,7,8,9,10,11,12,13,14,15,16,17-tetradecahydro-1*H*-cyclopenta[*a*]phenanthren-3-yl

4-(3-hydroxy-3-(3-methyl-1-(pyridin-2-yl)-1*H*-indol-2-yl)prop-1-yn-1-yl)benzoate (**6s**): light yellow solid; m.p. 152.7 – 153.5 °C; 220.0 mg, 28% yield; <sup>1</sup>H NMR (400 MHz, CDCl<sub>3</sub>) δ 8.63 (dd, *J* = 5.0, 1.3 Hz, 1H), 7.98 – 7.94 (m, 1H), 7.85 (d, *J* = 8.4 Hz, 2H), 7.71 (d, *J* = 8.1 Hz, 1H), 7.69 – 7.65 (m, 1H), 7.57 (d, *J* = 7.9 Hz, 1H), 7.49 (d, *J* = 11.0 Hz, 1H), 7.34 – 7.24 (m, 3H), 7.00 (d, *J* = 8.4 Hz, 2H), 5.99 (d, *J* = 11.0 Hz, 1H), 5.43 (d, *J* = 4.0 Hz, 1H), 5.22 – 5.16 (m, 1H), 5.08 – 5.02 (m, 1H), 4.90 – 4.78 (m, 1H), 2.50 (s, 3H), 2.45 (d, *J* = 7.7 Hz, 2H), 2.09 – 1.90 (m, 5H), 1.75 – 1.70 (m, 2H), 1.61 – 1.44 (m, 8H), 1.27 – 1.18 (m, 6H), 1.10 – 1.03 (m, 8H), 0.88 (d, *J* = 6.2 Hz, 3H), 0.86 (s, 1H), 0.83 (d, *J* = 7.0 Hz, 5H), 0.73 (s, 3H); <sup>13</sup>C NMR (101 MHz, CDCl<sub>3</sub>) δ 165.3, 152.1, 148.4, 139.5, 139.2, 138.3, 135.9, 135.0, 131.2, 130.2, 129.4, 129.3, 129.1, 126.9, 123.9, 122.9, 121.5, 121.3, 120.0, 119.6, 112.9, 110.1, 100.0, 91.2, 84.3, 77.3, 74.8, 56.8, 55.9, 51.3, 50.1, 42.2, 40.5, 39.6, 38.2, 37.0, 36.7, 31.9, 29.7, 28.9, 27.9, 25.4, 24.4, 21.3, 21.1, 21.0, 19.4, 19.0, 12.3, 12.1, 9.0; HR-MS [ESI-MS(+)] calcd for [M + H]<sup>+</sup>: C<sub>53</sub>H<sub>65</sub>N<sub>2</sub>O<sub>3</sub>: 777.4990, found: 777.4984; IR (KBr): 2952, 2864, 1716, 1591, 1475, 1439, 1365, 1271, 1174, 1112, 1017, 969, 856, 772, 740 cm<sup>-1</sup>.

### 1.3. Optimization of reaction conditions

Supplementary Table 1 | Mn-catalysts screening for the reaction <sup>a</sup>

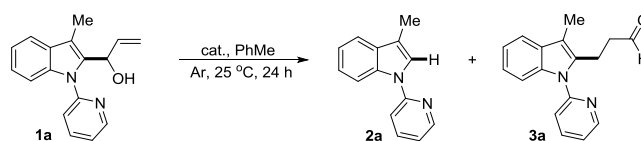

| entry | catalysts                              | yield <b>2a/3a</b> (%) <sup>b</sup> |
|-------|----------------------------------------|-------------------------------------|
| 1     | MnCl <sub>2</sub>                      | 0/0                                 |
| 2     | Mn(OTf) <sub>2</sub>                   | 0/0                                 |
| 3     | Mn(OAc) <sub>3</sub> ·H <sub>2</sub> O | 0/0                                 |
| 4     | Mn <sub>2</sub> (CO) <sub>10</sub>     | 0/23                                |
| 5     | Mn(CO) <sub>5</sub> Br                 | 3/27                                |

<sup>a</sup> All the reactions were carried out employing allylic alcohol **1a** (0.20 mmol), different Mn catalysts (0.01 mmol, 5 mol %) and PhMe (2.0 mL) under Ar atmosphere. The reaction mixture was then allowed to stir at 25 °C for 24 h, followed by flash chromatography on SiO<sub>2</sub>. <sup>b</sup> Isolated yield.

Supplementary Table 2 | The effect of the temperature for the reaction <sup>a</sup>

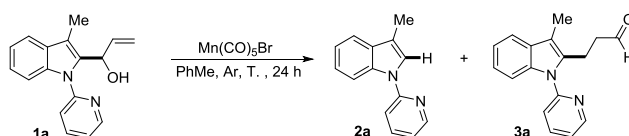

| entry | T(°C) | yield <b>2a/3a</b> (%) <sup>b</sup> |
|-------|-------|-------------------------------------|
| 1     | 25    | 3/27                                |
| 2     | 45    | 4/56                                |

|   |    |      |
|---|----|------|
| 3 | 75 | 7/61 |
| 4 | 85 | 5/54 |

<sup>a</sup> All the reactions were carried out employing allylic alcohol **1a** (0.20 mmol), Mn(CO)<sub>5</sub>Br (0.01 mmol, 5 mol %) and PhMe (2.0 mL) under Ar atmosphere. The reaction mixture was then allowed to stir at different temperature for 24 h, followed by flash chromatography on SiO<sub>2</sub>. <sup>b</sup> Isolated yield.

**Supplementary Table 3 | Various solvents screening for the reaction <sup>a</sup>**

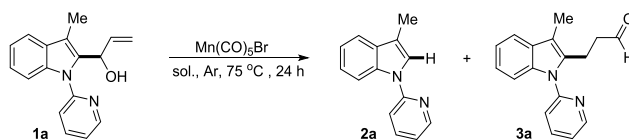

| entry | solvent            | yield <b>2a/3a</b> (%) <sup>b</sup> |
|-------|--------------------|-------------------------------------|
| 1     | Toluene            | 7/61                                |
| 2     | Benzotrifluoride   | 0/43                                |
| 3     | THF                | 0/17                                |
| 4     | DMF                | 0/38                                |
| 5     | CH <sub>3</sub> CN | 0/0                                 |
| 6     | DCE                | 0/80                                |

<sup>a</sup> All the reactions were carried out employing allylic alcohol **1a** (0.20 mmol), Mn(CO)<sub>5</sub>Br (0.01 mmol, 5 mol %) and solvent (2.0 mL) under Ar atmosphere. The reaction mixture was then allowed to stir at 75 °C for 24 h, followed by flash chromatography on SiO<sub>2</sub>. <sup>b</sup> Isolated yield.

**Supplementary Table 4 | Other transition-metal catalysts screening for the reaction <sup>a</sup>**

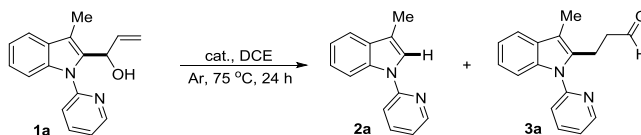

| entry | catalysts                                                               | yield <b>2a/3a</b> (%) <sup>b</sup> |
|-------|-------------------------------------------------------------------------|-------------------------------------|
| 1     | Cp*Co(CO)I <sub>2</sub>                                                 | 0/5                                 |
| 2     | Cp*Rh(CH <sub>3</sub> CN) <sub>3</sub> (SbF <sub>6</sub> ) <sub>2</sub> | 47/25                               |

<sup>a</sup> All the reactions were carried out employing allylic alcohol **1a** (0.20 mmol), catalyst (0.01 mmol, 5 mol %) and DCE (2.0 mL) under Ar atmosphere. The reaction mixture was then allowed to stir at 75 °C for 24 h, followed by flash chromatography on SiO<sub>2</sub>. <sup>b</sup> Isolated yield.

#### 1.4. Detail characterization for the sigmatropic rearrangement products **3** and **5**

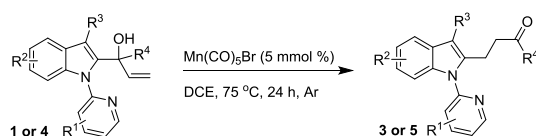

An oven-dried sealed tube charged allylic alcohols **1** or **4** (0.20 mmol), Mn(CO)<sub>5</sub>Br (0.01 mmol, 5 mol %) and DCE (2.0 mL) under Ar atmosphere. The reaction mixture was then allowed to stir at 75 °C for 24 h. After the reaction mixture was cooled down, the corresponding reaction mixture

was purified by flash chromatography on silica gel using ethyl acetate/petroleum ether (1: 10) as eluent to afford the desired products **2a**, **3** or **5**.

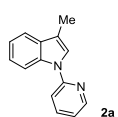

**3-Methyl-1-(pyridin-2-yl)-1H-indole (2a)** <sup>[6]</sup>: <sup>1</sup>H NMR (400 MHz, CDCl<sub>3</sub>) δ 8.59 – 8.56 (m, 1H), 8.28 (d, *J* = 8.3 Hz, 1H), 7.83 – 7.77 (m, 1H), 7.65 (d, *J* = 7.6 Hz, 1H), 7.56 (s, 1H), 7.47 (d, *J* = 8.3 Hz, 1H), 7.37 – 7.34 (m, 1H), 7.29 – 7.26 (m, 1H), 7.15 – 7.12 (m, 1H), 2.42 (s, 3H); <sup>13</sup>C NMR (101 MHz, CDCl<sub>3</sub>) δ 152.6, 148.9, 138.3, 135.4, 131.1, 123.3, 123.2, 120.9, 119.5, 119.1, 114.8, 114.0, 113.1, 9.7;

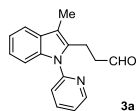

**3-(3-Methyl-1-(pyridin-2-yl)-1H-indol-2-yl)propanal (3a)**: The title compound was prepared from allylic alcohol **1a** (0.20 mmol, 52.8 mg) and was purified by column chromatography (10:1 = petroleum ether: ethyl acetate) to give a light yellow solid; m.p. 68.3 – 71.1 °C; 42.0 mg, 80% yield; <sup>1</sup>H NMR (500 MHz, CDCl<sub>3</sub>) δ 9.70 (s, 1H), 8.60 (dd, *J* = 4.7, 1.4 Hz, 1H), 7.89 – 7.85 (m, 1H), 7.55 – 7.53 (m, 1H), 7.45 (d, *J* = 8.0 Hz, 1H), 7.33 – 7.31 (m, 1H), 7.29 – 7.27 (m, 1H), 7.17 – 7.13 (m, 2H), 3.21 – 3.16 (m, 2H), 2.71 – 2.66 (m, 2H), 2.32 (s, 3H); <sup>13</sup>C NMR (126 MHz, CDCl<sub>3</sub>) δ 201.5, 151.6, 149.6, 138.4, 136.4, 135.0, 129.4, 122.2, 121.8, 120.7, 120.5, 118.4, 110.5, 109.9, 43.9, 17.9, 8.8; HR-MS [ESI-MS(+)] calcd for [M + H]<sup>+</sup>: C<sub>17</sub>H<sub>17</sub>N<sub>2</sub>O: 265.1335, found: 265.1339; IR (KBr): 3050, 2921, 1747, 1722, 1715, 1471, 1434, 1361, 1338, 991, 740 cm<sup>-1</sup>.

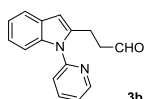

**3-(1-(pyridin-2-yl)-1H-indol-2-yl)propanal (3b)** <sup>[7]</sup>: The title compound was prepared from allylic alcohol **1b** (0.20 mmol, 50.0 mg) and was purified by column chromatography (10:1 = petroleum ether: ethyl acetate) to give a light yellow oil; 33.0 mg, 66% yield; <sup>1</sup>H NMR (400 MHz, CDCl<sub>3</sub>) δ 9.81 (t, *J* = 1.3 Hz, 1H), 8.69 – 8.65 (m, 1H), 7.95 – 7.90 (m, 1H), 7.62 – 7.58 (m, 1H), 7.50 (d, *J* = 8.0 Hz, 1H), 7.38 – 7.33 (m, 2H), 7.19 – 7.15 (m, 2H), 6.47 (d, *J* = 0.7 Hz, 1H), 3.21 (t, *J* = 7.5 Hz, 2H), 2.88 – 2.84 (m, 2H); <sup>13</sup>C NMR (101 MHz, CDCl<sub>3</sub>) δ 201.4, 151.2, 149.8, 139.4, 138.5, 137.3, 128.5, 122.2, 122.1, 121.0, 120.9, 120.2, 110.1, 102.6, 42.9, 20.4.

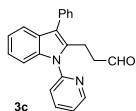

**3-(3-Phenyl-1-(pyridin-2-yl)-1H-indol-2-yl)propanal (3c)**: The title compound was prepared from allylic alcohol **1c** (0.20 mmol, 62.5 mg) and was purified by column chromatography (10:1 = petroleum ether: ethyl acetate) to give a light yellow oil; 46.3 mg, 71% yield; <sup>1</sup>H NMR (500 MHz, CDCl<sub>3</sub>) δ 9.52 (s, 1H), 8.65 (dd, *J* = 4.8, 1.3 Hz, 1H), 7.94 – 7.91 (m, 1H), 7.59 (d, *J* = 7.3 Hz, 1H), 7.54 (d, *J* = 8.0 Hz, 1H), 7.52 – 7.46 (m, 4H), 7.37 – 7.34 (m, 3H), 7.21 – 7.14 (m, 2H), 3.32 – 3.26 (m, 2H), 2.56 (t, *J* = 7.7 Hz, 2H); <sup>13</sup>C NMR (126 MHz, CDCl<sub>3</sub>) δ 201.1, 151.3, 149.9, 138.6, 136.7, 135.4, 134.6, 129.9, 128.7, 128.3, 126.7, 122.7, 122.4, 121.2, 121.1, 119.3, 118.0, 110.1, 43.9, 18.2; HR-MS [ESI-MS(+)] calcd for [M + H]<sup>+</sup>: C<sub>22</sub>H<sub>19</sub>N<sub>2</sub>O: 327.1492, found: 327.1488; IR (KBr): 3053, 2900, 1715, 1558, 1470, 1456, 1435, 1371, 1338, 1189, 743 cm<sup>-1</sup>.

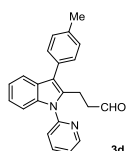

**3-(1-(pyridin-2-yl)-3-(p-tolyl)-1H-indol-2-yl)propanal (3d)**: The title compound was prepared from allylic alcohol **1d** (0.20 mmol, 68.0 mg) and was purified by column chromatography (10:1 = petroleum ether: ethyl acetate) to give a brown solid; m.p. 62.4 – 65.1 °C; 51.0 mg, 75% yield; <sup>1</sup>H NMR (400 MHz, CDCl<sub>3</sub>) δ 9.57 (s, 1H), 8.69 (dd, *J* = 4.8, 1.3 Hz, 1H), 7.98 – 7.94 (m, 1H), 7.64 – 7.62 (m, 1H), 7.58 (d, *J* = 8.0 Hz, 1H), 7.45 (d, *J* = 8.0 Hz, 2H), 7.41 – 7.33 (m, 4H), 7.25 – 7.18 (m, 2H), 3.36 – 3.29 (m, 2H), 2.62 – 2.58 (m, 2H), 2.48 (s, 3H); <sup>13</sup>C NMR (101 MHz, CDCl<sub>3</sub>) δ 201.2, 151.3, 149.8, 138.6, 136.6, 136.4, 135.2, 131.6, 129.8, 129.5, 128.4, 122.7, 122.4, 121.2, 121.1, 119.4, 117.9, 110.1, 43.9, 21.3, 18.3; HR-MS [ESI-MS(+)] calcd for [M + H]<sup>+</sup>: C<sub>23</sub>H<sub>21</sub>N<sub>2</sub>O: 341.1648, found: 341.1643;

IR (KBr): 3051, 2923, 2854, 1721, 1586, 1567, 1470, 1457, 1437, 1370, 1317, 1190, 1148, 821, 786, 743  $\text{cm}^{-1}$ .

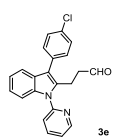

**1-(3-(4-Chlorophenyl)-1-(pyridin-2-yl)-1H-indol-2-yl)prop-2-en-1-ol (3e):** The title compound was prepared from allylic alcohol **1e** (0.20 mmol, 72.0 mg) and was purified by column chromatography (10:1 = petroleum ether: ethyl acetate) to give a light yellow oil; 50.4 mg, 70% yield;  $^1\text{H}$  NMR (400 MHz,  $\text{CDCl}_3$ )  $\delta$  9.57 (s, 1H), 8.72 – 8.67 (m, 1H), 7.99 – 7.95 (m, 1H), 7.60 – 7.55 (m, 2H), 7.52 – 7.45 (m, 4H), 7.42 – 7.37 (m, 2H), 7.26 – 7.18 (m, 2H), 3.35 – 3.27 (m, 2H), 2.61 – 2.57 (m, 2H);  $^{13}\text{C}$  NMR (101 MHz,  $\text{CDCl}_3$ )  $\delta$  200.8, 151.1, 149.9, 138.7, 136.7, 135.6, 133.2, 132.6, 131.2, 129.0, 128.0, 122.89, 122.6, 121.4, 121.2, 119.0, 116.7, 110.2, 43.8, 18.1; HR-MS [ESI-MS(+)] calcd for  $[\text{M} + \text{H}]^+$ :  $\text{C}_{22}\text{H}_{18}\text{ClN}_2\text{O}$ : 361.1102, found: 361.1097; IR (KBr): 2923, 2852, 1734, 1654, 1617, 1577, 1571, 1467, 1437, 1420, 1382, 745  $\text{cm}^{-1}$ .

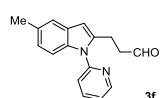

**3-(5-Methyl-1-(pyridin-2-yl)-1H-indol-2-yl)propanal (3f):** The title compound was prepared from allylic alcohol **1f** (0.20 mmol, 52.8 mg) and was purified by column chromatography (10:1 = petroleum ether: ethyl acetate) to give a brown solid; m.p. 86.7 – 88.7  $^\circ\text{C}$ ; 38.5 mg, 73% yield;  $^1\text{H}$  NMR (400 MHz,  $\text{CDCl}_3$ )  $\delta$  9.80 (t,  $J$  = 1.3 Hz, 1H), 8.67 – 8.64 (m, 1H), 7.93 – 7.89 (m, 1H), 7.49 (d,  $J$  = 8.0 Hz, 1H), 7.39 (s, 1H), 7.35 – 7.32 (m, 1H), 7.26 (d,  $J$  = 8.4 Hz, 1H), 7.01 – 6.99 (m, 1H), 6.38 (s, 1H), 3.21 (t,  $J$  = 7.5 Hz, 2H), 2.87 – 2.83 (m, 2H), 2.47 (s, 3H);  $^{13}\text{C}$  NMR (101 MHz,  $\text{CDCl}_3$ )  $\delta$  201.5, 151.4, 149.7, 139.5, 138.4, 135.6, 130.2, 128.8, 123.6, 122.0, 120.7, 120.0, 109.8, 102.3, 42.9, 21.4, 20.5; HR-MS [ESI-MS(+)] calcd for  $[\text{M} + \text{H}]^+$ :  $\text{C}_{17}\text{H}_{17}\text{N}_2\text{O}$ : 265.1335, found: 265.1335; IR (KBr): 2920, 2855, 1719, 1587, 1470, 1437, 1378, 1298, 786  $\text{cm}^{-1}$ .

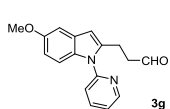

**3-(5-Methoxy-1-(pyridin-2-yl)-1H-indol-2-yl)propanal (3g):** The title compound was prepared from allylic alcohol **1g** (0.20 mmol, 56.0 mg) and was purified by column chromatography (8:1 = petroleum ether: ethyl acetate) to give a light yellow oil; 39.8 mg, 71% yield;  $^1\text{H}$  NMR (400 MHz,  $\text{CDCl}_3$ )  $\delta$  9.79 (s, 1H), 8.65 (dd,  $J$  = 4.9, 1.2 Hz, 1H), 7.92 – 7.87 (m, 1H), 7.46 (d,  $J$  = 8.0 Hz, 1H), 7.34 – 7.31 (m, 1H), 7.27 (d,  $J$  = 8.9 Hz, 1H), 7.07 (d,  $J$  = 2.4 Hz, 1H), 6.82 (dd,  $J$  = 8.9, 2.5 Hz, 1H), 6.39 (s, 1H), 3.87 (s, 3H), 3.20 (t,  $J$  = 7.5 Hz, 2H), 2.86 – 2.82 (m, 2H);  $^{13}\text{C}$  NMR (101 MHz,  $\text{CDCl}_3$ )  $\delta$  201.4, 154.9, 151.3, 149.7, 140.0, 138.5, 132.3, 129.1, 122.0, 120.6, 111.7, 111.0, 102.6, 102.3, 55.8, 42.9, 20.5; HR-MS [ESI-MS(+)] calcd for  $[\text{M} + \text{H}]^+$ :  $\text{C}_{17}\text{H}_{17}\text{N}_2\text{O}_2$ : 281.1285, found: 281.1276; IR (KBr): 2929, 2831, 1720, 1616, 1583, 1474, 1450, 1438, 1389, 1205, 1173, 1033, 843, 786, 746  $\text{cm}^{-1}$ .

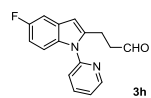

**3-(5-Fluoro-1-(pyridin-2-yl)-1H-indol-2-yl)propanal (3h):** The title compound was prepared from allylic alcohol **1h** (0.20 mmol, 53.6 mg) and was purified by column chromatography (10:1 = petroleum ether: ethyl acetate) to give a light yellow oil; 38.7 mg, 72% yield;  $^1\text{H}$  NMR (400 MHz,  $\text{CDCl}_3$ )  $\delta$  9.80 (s, 1H), 8.68 – 8.66 (m, 1H), 7.95 – 7.91 (m, 1H), 7.46 (d,  $J$  = 8.0 Hz, 1H), 7.39 – 7.35 (m, 1H), 7.29 – 7.21 (m, 2H), 6.92 – 6.87 (m, 1H), 6.41 (s, 1H), 3.18 (t,  $J$  = 7.4 Hz, 2H), 2.88 – 2.84 (m, 2H);  $^{13}\text{C}$  NMR (101 MHz,  $\text{CDCl}_3$ )  $\delta$  201.1, 158.5 (d,  $J$  = 236.3,  $^1J_{\text{CF}}$ ), 151.0, 149.8, 141.1, 138.6, 133.8, 128.9 (d,  $J$  = 10.1,  $^3J_{\text{CF}}$ ), 122.5, 120.9, 110.9 (d,  $J$  = 9.1,  $^3J_{\text{CF}}$ ), 110.1 (d,  $J$  = 26.3,  $^2J_{\text{CF}}$ ), 105.2 (d,  $J$  = 23.2,  $^2J_{\text{CF}}$ ), 102.5 (d,  $J$  = 4.0,  $^3J_{\text{CF}}$ ), 42.8, 20.3; HR-MS [ESI-MS(+)] calcd for  $[\text{M} + \text{H}]^+$ :  $\text{C}_{16}\text{H}_{14}\text{FN}_2\text{O}$ : 269.1085, found: 269.1078; IR (KBr): 3065, 2924, 1724, 1584, 1471, 1449, 1437, 1387, 1177, 1108, 955, 855, 781  $\text{cm}^{-1}$ .

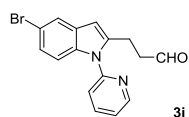

**3-(5-Bromo-1-(pyridin-2-yl)-1H-indol-2-yl)propanal (3i):** The title compound was prepared from allylic alcohol **1i** (0.20 mmol, 65.6 mg) and was purified by column chromatography (10:1 = petroleum ether: ethyl acetate) to give a yellow oil; 42.8 mg, 65% yield;  $^1\text{H}$  NMR (400 MHz,  $\text{CDCl}_3$ )  $\delta$  9.80 (s, 1H), 8.67 (dd,  $J = 4.8, 1.0$  Hz, 1H), 7.95 – 7.91 (m, 1H), 7.70 (d,  $J = 1.5$  Hz, 1H), 7.44 (d,  $J = 7.6$  Hz, 1H), 7.40 – 7.35 (m, 1H), 7.25 – 7.18 (m, 2H), 6.38 (s, 1H), 3.17 (t,  $J = 7.4$  Hz, 2H), 2.85 (t,  $J = 7.5$  Hz, 2H);  $^{13}\text{C}$  NMR (101 MHz,  $\text{CDCl}_3$ )  $\delta$  201.0, 150.8, 149.9, 140.8, 138.7, 135.9, 130.1, 124.8, 122.6, 120.9, 114.0, 111.6, 101.9, 42.7, 20.2; HR-MS [ESI-MS(+)] calcd for  $[\text{M} + \text{H}]^+$ :  $\text{C}_{16}\text{H}_{14}\text{BrN}_2\text{O}$ : 329.0284, found: 329.0279; IR (KBr): 2921, 1719, 1584, 1468, 1438, 1382, 1338, 1204, 1144, 1049, 864, 782, 740  $\text{cm}^{-1}$ .

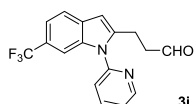

**3-(1-(Pyridin-2-yl)-6-(trifluoromethyl)-1H-indol-2-yl)propanal (3j):** The title compound was prepared from allylic alcohol **1j** (0.20 mmol, 63.6 mg) and was purified by column chromatography (10:1 = petroleum ether: ethyl acetate) to give a brown oil; 46.00 mg, 70% yield;  $^1\text{H}$  NMR (400 MHz,  $\text{CDCl}_3$ )  $\delta$  9.81 (s, 1H), 8.71 (dd,  $J = 4.9, 1.2$  Hz, 1H), 8.00 – 7.96 (m, 1H), 7.67 (d,  $J = 8.3$  Hz, 1H), 7.58 (s, 1H), 7.48 (d,  $J = 8.0$  Hz, 1H), 7.44 – 7.39 (m, 2H), 6.52 (s, 1H), 3.19 (t,  $J = 7.4$  Hz, 2H), 2.88 (t,  $J = 7.4$  Hz, 2H);  $^{13}\text{C}$  NMR (101 MHz,  $\text{CDCl}_3$ )  $\delta$  200.8, 150.4, 150.1, 142.4, 138.9, 136.3, 130.8, 125.2 (d,  $J = 272.7$ ,  $^1J_{\text{CF}}$ ), 124.1 (d,  $J = 31.3$ ,  $^2J_{\text{CF}}$ ), 123.0, 121.1, 120.4, 117.6 (q,  $J = 4.0$ ,  $^3J_{\text{CF}}$ ), 107.7 (q,  $J = 4.0$ ,  $^3J_{\text{CF}}$ ), 102.5, 42.7, 20.2; HR-MS [ESI-MS(+)] calcd for  $[\text{M} + \text{H}]^+$ :  $\text{C}_{17}\text{H}_{14}\text{F}_3\text{N}_2\text{O}$ : 319.1058, found: 319.0146; IR (KBr): 2927, 2854, 1724, 1588, 1547, 1472, 1450, 1349, 1323, 1162, 1114, 1059, 956, 824, 787, 745, 659  $\text{cm}^{-1}$ .

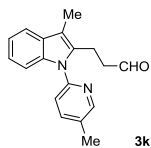

**3-(3-Methyl-1-(5-methylpyridin-2-yl)-1H-indol-2-yl)propanal (3k):** The title compound was prepared from allylic alcohol **1k** (0.20 mmol, 55.6 mg) and was purified by column chromatography (10:1 = petroleum ether: ethyl acetate) to give a yellow solid; m.p. 61.7 – 62.7  $^\circ\text{C}$ ; 37.0 mg, 67% yield;  $^1\text{H}$  NMR (500 MHz,  $\text{CDCl}_3$ )  $\delta$  9.68 (s, 1H), 8.41 (s, 1H), 7.67 (dd,  $J = 8.0, 1.9$  Hz, 1H), 7.54 – 7.52 (m, 1H), 7.32 (d,  $J = 8.0$  Hz, 1H), 7.27 – 7.24 (m, 1H), 7.15 – 7.12 (m, 2H), 3.16 – 3.12 (m, 2H), 2.66 (t,  $J = 7.6$  Hz, 2H), 2.41 (s, 3H), 2.31 (s, 3H);  $^{13}\text{C}$  NMR (126 MHz,  $\text{CDCl}_3$ )  $\delta$  201.7, 149.8, 149.1, 139.0, 136.6, 134.9, 131.7, 129.2, 122.0, 120.3, 120.2, 118.3, 110.1, 109.9, 43.9, 18.1, 17.9, 8.8; HR-MS [ESI-MS(+)] calcd for  $[\text{M} + \text{H}]^+$ :  $\text{C}_{18}\text{H}_{19}\text{N}_2\text{O}$ : 279.1492, found: 279.1491; IR (KBr): 3045, 2922, 1867, 1715, 1484, 1457, 1387, 1361, 1316, 1221, 1135, 1025, 830, 740  $\text{cm}^{-1}$ .

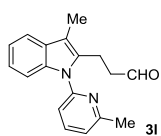

**3-(3-Methyl-1-(6-methylpyridin-2-yl)-1H-indol-2-yl)propanal (3l):** The title compound was prepared from allylic alcohol **1l** (0.20 mmol, 55.6 mg) and was purified by column chromatography (10:1 = petroleum ether: ethyl acetate) to give a light yellow oil; 36.7 mg, 66% yield;  $^1\text{H}$  NMR (400 MHz,  $\text{CDCl}_3$ )  $\delta$  9.77 (s, 1H), 7.79 (t,  $J = 7.7$  Hz, 1H), 7.59 – 7.56 (m, 1H), 7.38 – 7.34 (m, 1H), 7.29 (d,  $J = 7.8$  Hz, 1H), 7.20 – 7.16 (m, 3H), 3.23 – 3.18 (m, 2H), 2.79 (t,  $J = 7.6$  Hz, 2H), 2.60 (s, 3H), 2.35 (s, 3H);  $^{13}\text{C}$  NMR (101 MHz,  $\text{CDCl}_3$ )  $\delta$  201.7, 158.9, 150.7, 138.6, 136.36, 134.9, 129.3, 122.1, 121.3, 120.3, 118.4, 117.5, 110.3, 110.0, 44.1, 24.3, 18.0, 8.8; HR-MS [ESI-MS(+)] calcd for  $[\text{M} + \text{H}]^+$ :  $\text{C}_{18}\text{H}_{19}\text{N}_2\text{O}$ : 279.1492, found: 279.1491; IR (KBr): 2922, 1867, 1715, 1541, 1488, 1456, 1360, 1338, 1148, 989, 740  $\text{cm}^{-1}$ .

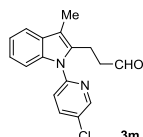

**3-(1-(5-Chloropyridin-2-yl)-3-methyl-1H-indol-2-yl)propanal (3m):** The title compound was prepared from allylic alcohol **1m** (0.20 mmol, 59.6 mg) and was purified by column chromatography (10:1 = petroleum ether: ethyl acetate) to give

a yellow oil; 42.0 mg, 70% yield;  $^1\text{H}$  NMR (400 MHz,  $\text{CDCl}_3$ )  $\delta$  9.76 (s, 1H), 8.57 (d,  $J = 2.6$  Hz, 1H), 7.89 – 7.89 (m, 1H), 7.59 – 7.56 (m, 1H), 7.46 (d,  $J = 8.5$  Hz, 1H), 7.35 – 7.32 (m, 1H), 7.22 – 7.18 (m, 2H), 3.21 – 3.16 (m, 2H), 2.75 (t,  $J = 7.6$  Hz, 2H), 2.34 (s, 3H);  $^{13}\text{C}$  NMR (101 MHz,  $\text{CDCl}_3$ )  $\delta$  201.4, 149.7, 148.4, 138.2, 136.2, 134.9, 129.7, 129.5, 122.5, 121.2, 120.8, 118.6, 111.1, 109.7, 43.9, 17.9, 8.8; HR-MS [ESI-MS(+)] calcd for  $[\text{M} + \text{H}]^+$ :  $\text{C}_{17}\text{H}_{16}\text{ClN}_2\text{O}$ : 299.0946, found: 299.0944; IR (KBr): 3052, 2923, 2315, 1714, 1681, 1648, 1470, 1434, 1417, 1114, 1011, 742, 680  $\text{cm}^{-1}$ .

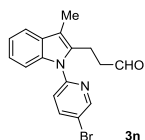

**3-(1-(5-Bromopyridin-2-yl)-3-methyl-1H-indol-2-yl)propanal (3n):** The title compound was prepared from allylic alcohol **1n** (0.20 mmol, 68.4 mg) and was purified by column chromatography (10:1 = petroleum ether: ethyl acetate) to give a yellow oil; 45.0 mg, 66% yield;  $^1\text{H}$  NMR (500 MHz,  $\text{CDCl}_3$ )  $\delta$  9.72 (s, 1H), 8.63 (d,  $J = 2.2$  Hz, 1H), 7.97 – 7.95 (m, 1H), 7.55 – 7.52 (m, 1H), 7.36 (d,  $J = 8.5$  Hz, 1H), 7.32 – 7.29 (m, 1H), 7.18 – 7.15 (m, 2H), 3.15 (t,  $J = 7.6$  Hz, 2H), 2.71 (t,  $J = 7.6$  Hz, 2H), 2.30 (s, 3H);  $^{13}\text{C}$  NMR (126 MHz,  $\text{CDCl}_3$ )  $\delta$  201.3, 150.6, 150.1, 141.0, 136.2, 134.9, 129.6, 122.5, 121.6, 120.8, 118.6, 118.0, 111.2, 109.8, 43.9, 17.9, 8.8; HR-MS [ESI-MS(+)] calcd for  $[\text{M} + \text{H}]^+$ :  $\text{C}_{17}\text{H}_{16}\text{BrN}_2\text{O}$ : 343.0441, found: 343.0438; IR (KBr): 2920, 1747, 1730, 1714, 1681, 1556, 1506, 1488, 1417, 1455, 742  $\text{cm}^{-1}$ .

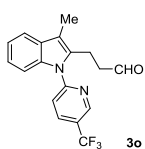

**3-(3-Methyl-1-(5-(trifluoromethyl)pyridin-2-yl)-1H-indol-2-yl)propanal (3o):** The title compound was prepared from allylic alcohol **1o** (0.20 mmol, 66.4 mg) and was purified by column chromatography (20:1 = petroleum ether: ethyl acetate) to give a yellow solid; m.p. 64.9 – 69.2  $^{\circ}\text{C}$ ; 45.3 mg, 68% yield;  $^1\text{H}$  NMR (400 MHz,  $\text{CDCl}_3$ )  $\delta$  9.75 (s, 1H), 8.84 (s, 1H), 8.10 – 8.07 (m, 1H), 7.61 (d,  $J = 8.4$  Hz, 1H), 7.57 – 7.53 (m, 1H), 7.43 – 7.38 (m, 1H), 7.22 – 7.17 (m, 2H), 3.23 – 3.18 (m, 2H), 2.80 – 2.74 (m, 2H), 2.32 (s, 3H);  $^{13}\text{C}$  NMR (101 MHz,  $\text{CDCl}_3$ )  $\delta$  201.2, 154.2, 146.7 (q,  $J = 4.0$ ,  $^3J_{\text{CF}}$ ), 135.9, 135.7 (q,  $J = 4.0$ ,  $^3J_{\text{CF}}$ ), 135.0, 129.9, 124.0 (d,  $J = 34.3$ ,  $^2J_{\text{CF}}$ ), 123.5 (d,  $J = 272.7$ ,  $^1J_{\text{CF}}$ ), 122.8, 121.3, 119.5, 118.8, 112.2, 109.9, 44.0, 18.1, 8.8; HR-MS [ESI-MS(+)] calcd for  $[\text{M} + \text{H}]^+$ :  $\text{C}_{18}\text{H}_{16}\text{F}_3\text{N}_2\text{O}$ : 333.1209, found: 333.1203; IR (KBr): 2924, 1715, 1556, 1540, 1506, 1488, 1455, 1325, 1120, 1110, 740  $\text{cm}^{-1}$ .

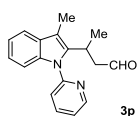

**3-(3-Methyl-1-(pyridin-2-yl)-1H-indol-2-yl)butanal (3p):** The title compound was prepared from allylic alcohol **1p** (0.20 mmol, 55.6 mg) and was purified by column chromatography (10:1 = petroleum ether: ethyl acetate) to give a yellow oil; 34.5 mg, 62% yield;  $^1\text{H}$  NMR (400 MHz,  $\text{CDCl}_3$ )  $\delta$  9.74 – 9.67 (m, 1H), 8.67 (dd,  $J = 4.9, 1.2$  Hz, 1H), 7.96 – 7.91 (m, 1H), 7.60 – 7.56 (m, 1H), 7.48 (d,  $J = 7.9$  Hz, 1H), 7.39 – 7.36 (m, 1H), 7.22 – 7.15 (m, 3H), 3.80 – 3.66 (m, 1H), 3.11 – 3.04 (m, 1H), 2.85 – 2.79 (m, 1H), 2.45 (s, 3H), 1.39 (d,  $J = 7.2$  Hz, 3H);  $^{13}\text{C}$  NMR (101 MHz,  $\text{CDCl}_3$ )  $\delta$  201.8, 151.8, 149.7, 138.9, 138.4, 136.5, 129.7, 122.4, 122.2, 122.2, 120.3, 118.1, 109.9, 109.3, 49.9, 26.2, 19.9, 9.6; HR-MS [ESI-MS(+)] calcd for  $[\text{M} + \text{H}]^+$ :  $\text{C}_{18}\text{H}_{19}\text{N}_2\text{O}$ : 279.1492, found: 279.1489; IR (KBr): 3052, 2967, 2925, 2722, 1721, 1587, 1568, 1470, 1458, 1437, 1361, 1310, 1225, 1198, 1148, 1012, 779, 742  $\text{cm}^{-1}$ .

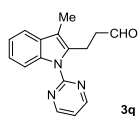

**3-(3-Methyl-1-(pyrimidin-2-yl)-1H-indol-2-yl)propanal (3q)** <sup>[7]</sup>: The title compound was prepared from allylic alcohol **1q** (0.20 mmol, 53.0 mg) and was purified by column chromatography (10:1 = petroleum ether: ethyl acetate) to give a light yellow solid; 40.3 mg, 76% yield;  $^1\text{H}$  NMR (500 MHz,  $\text{CDCl}_3$ )  $\delta$  9.81 (s, 1H), 8.71 (d,  $J = 4.8$  Hz, 2H), 8.34 (d,  $J = 7.9$  Hz, 1H), 7.50 (d,  $J = 7.9$  Hz, 1H), 7.27 – 7.20 (m, 2H), 7.07 (t,  $J = 4.8$  Hz, 1H), 3.45 – 3.39 (m, 2H), 2.84 (t,  $J = 7.5$  Hz, 2H), 2.29 (s, 3H);  $^{13}\text{C}$  NMR (126 MHz,

CDCl<sub>3</sub>)  $\delta$  202.0, 158.1, 136.1, 135.0, 130.4, 123.2, 121.8, 118.1, 116.7, 114.3, 113.7, 44.3, 19.5, 8.8.

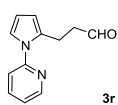

**3-(1-(Pyridin-2-yl)-1H-pyrrol-2-yl)propanal (3r):** The title compound was prepared from allylic alcohol **1r** (0.20 mmol, 40.0 mg) and was purified by column chromatography (10:1 = petroleum ether: ethyl acetate) to give a brown oil; 14.0 mg, 35% yield; <sup>1</sup>H NMR (500 MHz, CDCl<sub>3</sub>)  $\delta$  9.79 (s, 1H), 8.49 (d,  $J$  = 3.8 Hz, 1H), 7.81 – 7.78 (m, 1H), 7.31 (d,  $J$  = 8.1 Hz, 1H), 7.22 – 7.20 (m, 1H), 7.02 – 6.99 (m, 1H), 6.24 (t,  $J$  = 3.2 Hz, 1H), 6.08 (s, 1H), 3.21 (t,  $J$  = 7.5 Hz, 2H), 2.80 (t,  $J$  = 7.5 Hz, 2H); <sup>13</sup>C NMR (126 MHz, CDCl<sub>3</sub>)  $\delta$  202.2, 152.8, 148.7, 138.5, 132.2, 121.2, 120.8, 117.1, 109.5, 109.4, 43.6, 20.7; HR-MS [ESI-MS(+)] calcd for [M + H]<sup>+</sup>: C<sub>12</sub>H<sub>13</sub>N<sub>2</sub>O: 201.1022, found: 201.1028; IR (KBr): 2925, 1747, 1731, 1715, 1697, 1541, 1506, 1488, 1455, 742 cm<sup>-1</sup>.

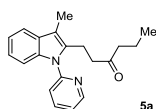

**1-(3-Methyl-1-(pyridin-2-yl)-1H-indol-2-yl)hexan-3-one (5a):** The title compound was prepared from tertiary allylic alcohol **4a** (0.20 mmol, 61.2 mg) and was purified by column chromatography (20:1 = petroleum ether: ethyl acetate) to give a yellow oil; 52.0 mg, 85% yield; <sup>1</sup>H NMR (500 MHz, CDCl<sub>3</sub>)  $\delta$  8.59 (d,  $J$  = 4.6 Hz, 1H), 7.87 – 7.84 (m, 1H), 7.53 (d,  $J$  = 6.8 Hz, 1H), 7.42 (d,  $J$  = 8.0 Hz, 1H), 7.31 (d,  $J$  = 8.2 Hz, 1H), 7.28 – 7.26 (m, 1H), 7.17 – 7.11 (m, 2H), 3.13 – 3.07 (m, 2H), 2.64 – 2.60 (m, 2H), 2.30 (s, 3H), 2.26 (t,  $J$  = 7.3 Hz, 2H), 1.55 – 1.50 (m, 2H), 0.84 (t,  $J$  = 7.4 Hz, 3H); <sup>13</sup>C NMR (126 MHz, CDCl<sub>3</sub>)  $\delta$  210.3, 151.7, 149.6, 138.4, 136.5, 135.7, 129.4, 122.0, 121.8, 120.8, 120.3, 118.4, 110.3, 109.9, 44.7, 42.5, 19.5, 17.3, 13.7, 8.7; HR-MS [ESI-MS(+)] calcd for [M + H]<sup>+</sup>: C<sub>20</sub>H<sub>23</sub>N<sub>2</sub>O: 307.1805, found: 307.1789; IR (KBr): 2960, 2928, 1709, 1585, 1469, 1458, 1437, 1359, 1220, 1150, 1000, 783, 740 cm<sup>-1</sup>.

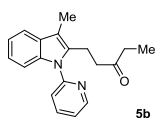

**1-(3-Methyl-1-(pyridin-2-yl)-1H-indol-2-yl)pentan-3-one (5b):** The title compound was prepared from tertiary allylic alcohol **4b** (0.20 mmol, 58.4 mg) and was purified by column chromatography (20:1 = petroleum ether: ethyl acetate) to give a brown solid; m.p. 62.9 – 65.0 °C; 46.6 mg, 77% yield; <sup>1</sup>H NMR (400 MHz, CDCl<sub>3</sub>)  $\delta$  8.65 – 8.63 (m, 1H), 7.92 – 7.88 (m, 1H), 7.59 – 7.57 (m, 1H), 7.47 (d,  $J$  = 8.0 Hz, 1H), 7.37 – 7.30 (m, 2H), 7.21 – 7.16 (m, 2H), 3.18 – 3.11 (m, 2H), 2.69 – 2.64 (m, 2H), 2.37 – 2.31 (m, 5H), 1.03 (t,  $J$  = 7.3 Hz, 3H); <sup>13</sup>C NMR (101 MHz, CDCl<sub>3</sub>)  $\delta$  210.7, 151.7, 149.6, 138.4, 136.5, 135.7, 129.5, 122.0, 121.8, 120.8, 120.3, 118.4, 110.3, 109.9, 42.0, 35.9, 19.6, 8.7, 7.8; HR-MS [ESI-MS(+)] calcd for [M + H]<sup>+</sup>: C<sub>19</sub>H<sub>21</sub>N<sub>2</sub>O: 293.1648, found: 293.1649; IR (KBr): 2925, 1713, 1584, 1556, 1470, 1456, 1435, 1360, 1110, 780, 740 cm<sup>-1</sup>.

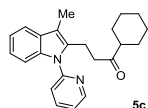

**1-Cyclohexyl-3-(3-methyl-1-(pyridin-2-yl)-1H-indol-2-yl)propan-1-one (5c):** The title compound was prepared from tertiary allylic alcohol **4c** (0.20 mmol, 69.2 mg) and was purified by column chromatography (20:1 = petroleum ether: ethyl acetate) to give a yellow oil; 44.7 mg, 65% yield; <sup>1</sup>H NMR (500 MHz, CDCl<sub>3</sub>)  $\delta$  8.59 (dd,  $J$  = 4.8, 1.2 Hz, 1H), 7.88 – 7.84 (m, 1H), 7.54 – 7.52 (m, 1H), 7.43 (d,  $J$  = 8.0 Hz, 1H), 7.32 – 7.26 (m, 2H), 7.16 – 7.11 (m, 2H), 3.09 – 3.05 (m, 2H), 2.69 – 2.65 (m, 2H), 2.30 (s, 3H), 2.21 (t,  $J$  = 10.4 Hz, 1H), 1.72 (d,  $J$  = 9.9 Hz, 4H), 1.64 (s, 1H), 1.28 – 1.16 (m, 5H); <sup>13</sup>C NMR (126 MHz, CDCl<sub>3</sub>)  $\delta$  213.25, 151.7, 149.6, 138.3, 136.5, 135.9, 129.5, 121.9, 121.7, 120.8, 120.3, 118.3, 110.1, 109.9, 50.8, 40.4, 28.4, 25.9, 25.6, 19.5, 8.7; HR-MS [ESI-MS(+)] calcd for [M + H]<sup>+</sup>: C<sub>23</sub>H<sub>27</sub>N<sub>2</sub>O: 347.2118, found: 347.2112; IR (KBr): 2928, 2853, 1705, 1585, 1472, 1459, 1437, 1363, 1205, 1146, 1010, 779, 740 cm<sup>-1</sup>.



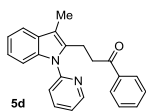

**3-(3-Methyl-1-(pyridin-2-yl)-1H-indol-2-yl)-1-phenylpropan-1-one (5d):** The title compound was prepared from tertiary allylic alcohol **4d** (0.20 mmol, 68.0 mg) and was purified by column chromatography (20:1 = petroleum ether: ethyl acetate) to give a brown oil; 55.6 mg, 82% yield;  $^1\text{H}$  NMR (400 MHz,  $\text{CDCl}_3$ )  $\delta$  8.64 – 8.62 (m, 1H), 7.94 – 7.88 (m, 3H), 7.62 – 7.54 (m, 2H), 7.53 – 7.43 (m, 3H), 7.40 – 7.36 (m, 1H), 7.32 – 7.29 (m, 1H), 7.24 – 7.18 (m, 2H), 3.32 (s, 4H), 2.39 (s, 3H);  $^{13}\text{C}$  NMR (101 MHz,  $\text{CDCl}_3$ )  $\delta$  199.4, 151.7, 149.7, 138.4, 136.7, 136.5, 135.8, 133.1, 129.5, 128.6, 128.1, 122.1, 121.9, 120.9, 120.4, 118.4, 110.4, 109.9, 38.9, 20.2, 8.8; HR-MS [ESI-MS(+)] calcd for  $[\text{M} + \text{H}]^+$ :  $\text{C}_{23}\text{H}_{21}\text{N}_2\text{O}$ : 341.1648, found: 341.1644; IR (KBr): 3055, 2921, 1682, 1585, 1471, 1437, 1362, 1223, 1205, 1148, 972, 780, 739, 690  $\text{cm}^{-1}$ .

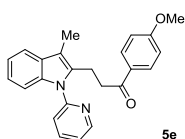

**1-(4-Methoxyphenyl)-3-(3-methyl-1-(pyridin-2-yl)-1H-indol-2-yl)propan-1-one (5e):** The title compound was prepared from tertiary allylic alcohol **4e** (0.20 mmol, 74.0 mg) and was purified by column chromatography (20:1 = petroleum ether: ethyl acetate) to give a light yellow oil; 54.8 mg, 74% yield;  $^1\text{H}$  NMR (400 MHz,  $\text{CDCl}_3$ )  $\delta$  8.62 (dd,  $J = 4.9, 1.8$  Hz, 1H), 7.92 – 7.86 (m, 3H), 7.60 – 7.56 (m, 1H), 7.49 (d,  $J = 8.0$  Hz, 1H), 7.38 – 7.36 (m, 1H), 7.32 – 7.28 (m, 1H), 7.22 – 7.16 (m, 2H), 6.93 – 6.88 (m, 2H), 3.87 (s, 3H), 3.31 – 3.26 (m, 2H), 3.25 – 3.20 (m, 2H), 2.37 (s, 3H);  $^{13}\text{C}$  NMR (101 MHz,  $\text{CDCl}_3$ )  $\delta$  198.0, 163.4, 151.7, 149.7, 138.4, 136.5, 135.9, 130.3, 129.9, 129.5, 122.0, 121.8, 120.9, 120.4, 118.4, 113.7, 110.4, 109.9, 55.5, 38.5, 20.3, 8.8; HR-MS [ESI-MS(+)] calcd for  $[\text{M} + \text{H}]^+$ :  $\text{C}_{24}\text{H}_{23}\text{N}_2\text{O}_2$ : 371.1754, found: 371.1749; IR (KBr): 2925, 1710, 1654, 1468, 1437, 1357, 1257, 1167, 739  $\text{cm}^{-1}$ .

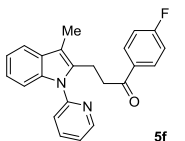

**1-(4-Fluorophenyl)-3-(3-methyl-1-(pyridin-2-yl)-1H-indol-2-yl)propan-1-one (5f):** The title compound was prepared from tertiary allylic alcohol **4f** (0.20 mmol, 71.6 mg) and was purified by column chromatography (20:1 = petroleum ether: ethyl acetate) to give a brown solid; m.p. 78.2 – 79.8  $^\circ\text{C}$ ; 59.1 mg, 83% yield;  $^1\text{H}$  NMR (400 MHz,  $\text{CDCl}_3$ )  $\delta$  8.61 (dd,  $J = 4.8, 1.3$  Hz, 1H), 7.97 – 7.88 (m, 3H), 7.60 – 7.58 (m, 1H), 7.50 (d,  $J = 8.0$  Hz, 1H), 7.40 – 7.34 (m, 1H), 7.32 – 7.28 (m, 1H), 7.23 – 7.17 (m, 2H), 7.14 – 7.08 (m, 2H), 3.29 (s, 4H), 2.37 (s, 3H);  $^{13}\text{C}$  NMR (101 MHz,  $\text{CDCl}_3$ )  $\delta$  197.8, 165.7 (d,  $J = 255.5$ ,  $^1J_{\text{CF}}$ ), 151.7, 149.7, 138.4, 136.5, 135.6, 133.2 (d,  $J = 3.0$ ,  $^3J_{\text{CF}}$ ), 130.7 (d,  $J = 10.1$ ,  $^3J_{\text{CF}}$ ), 129.5, 122.1, 121.9, 120.9, 120.4, 118.4, 115.6 (d,  $J = 21.2$ ,  $^2J_{\text{CF}}$ ), 110.5, 109.9, 38.8, 20.2, 8.8; HR-MS [ESI-MS(+)] calcd for  $[\text{M} + \text{H}]^+$ :  $\text{C}_{23}\text{H}_{20}\text{FN}_2\text{O}$ : 359.1554, found: 359.1551; IR (KBr): 3056, 2922, 1685, 1595, 1472, 1458, 1437, 1363, 1226, 1204, 1156, 977, 845, 779, 741  $\text{cm}^{-1}$ .

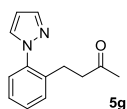

**4-(2-(1H-Pyrazol-1-yl)phenyl)butan-2-one (5g)** <sup>[25]</sup>: The title compound was prepared from tertiary allylic alcohol **4g** (0.20 mmol, 42.8 mg). The reaction mixture was allowed to stir at 100  $^\circ\text{C}$  for 24 h and was purified by column chromatography (10:1 = petroleum ether: ethyl acetate) to give a light yellow oil; 36.0 mg, 84% yield;  $^1\text{H}$  NMR (400 MHz,  $\text{CDCl}_3$ )  $\delta$  7.72 (d,  $J = 1.4$  Hz, 1H), 7.63 (d,  $J = 2.2$  Hz, 1H), 7.38 – 7.34 (m, 2H), 7.32 – 7.28 (m, 2H), 6.46 (t,  $J = 2.1$  Hz, 1H), 2.84 (t,  $J = 7.7$  Hz, 2H), 2.61 (t,  $J = 7.7$  Hz, 2H), 2.07 (s, 3H);  $^{13}\text{C}$  NMR (101 MHz,  $\text{CDCl}_3$ )  $\delta$  207.8, 140.4, 139.7, 137.3, 130.7, 130.6, 128.8, 127.1, 126.6, 106.5, 44.4, 29.8, 25.9;

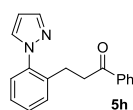

**3-(2-(1H-Pyrazol-1-yl)phenyl)-1-phenylpropan-1-one (5h)** <sup>[26]</sup>: The title compound was prepared from tertiary allylic alcohol **4h** (0.20 mmol, 55.2 mg). The reaction mixture was allowed to stir at 100  $^\circ\text{C}$  for 24 h and was purified by column chromatography (10:1 = petroleum ether: ethyl acetate) to give a light yellow oil;

39.2 mg, 71% yield;  $^1\text{H}$  NMR (400 MHz,  $\text{CDCl}_3$ )  $\delta$  7.93 – 7.89 (m, 2H), 7.73 (d,  $J$  = 1.6 Hz, 1H), 7.66 (d,  $J$  = 2.3 Hz, 1H), 7.55 (t,  $J$  = 7.4 Hz, 1H), 7.47 – 7.37 (m, 4H), 7.35 – 7.31 (m, 2H), 6.47 (t,  $J$  = 2.1 Hz, 1H), 3.20 – 3.15 (m, 2H), 3.04 – 2.99 (m, 2H);  $^{13}\text{C}$  NMR (101 MHz,  $\text{CDCl}_3$ )  $\delta$  199.3, 140.5, 139.9, 137.5, 136.7, 133.0, 130.8, 130.7, 128.9, 128.5, 128.1, 127.1, 126.6, 106.6, 39.8, 26.6;

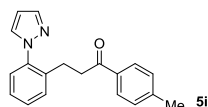

**3-(2-(1H-Pyrazol-1-yl)phenyl)-1-(p-tolyl)propan-1-one (5i):** The title compound was prepared from tertiary allylic alcohol **4i** (0.20 mmol, 58.0 mg), The reaction mixture was allowed to stir at 100 °C for 24 h and was purified by column chromatography (10:1 = petroleum ether: ethyl acetate)

to give a light yellow oil; 44.0 mg, 76% yield;  $^1\text{H}$  NMR (500 MHz,  $\text{CDCl}_3$ )  $\delta$  7.78 (d,  $J$  = 7.9 Hz, 2H), 7.70 (s, 1H), 7.62 (s, 1H), 7.39 (d,  $J$  = 7.5 Hz, 1H), 7.37 – 7.33 (m, 1H), 7.30 (d,  $J$  = 4.2 Hz, 2H), 7.20 (d,  $J$  = 7.9 Hz, 2H), 6.43 (s, 1H), 3.13 – 3.09 (m, 2H), 3.00 – 2.95 (m, 2H), 2.38 (s, 3H);  $^{13}\text{C}$  NMR (126 MHz,  $\text{CDCl}_3$ )  $\delta$  198.9, 143.8, 140.5, 139.9, 137.6, 134.2, 130.8, 130.7, 129.2, 128.8, 128.3, 127.1, 126.6, 106.5, 39.7, 26.7, 21.6; HR-MS [ESI-MS(+)] calcd for  $[\text{M} + \text{H}]^+$ :  $\text{C}_{19}\text{H}_{19}\text{N}_2\text{O}$ : 291.1492, found: 291.1492; IR (KBr): 3037, 2925, 1678, 1606, 1513, 1452, 1394, 1289, 1182, 1046, 976, 939, 821, 761  $\text{cm}^{-1}$ .

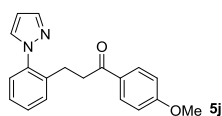

**3-(2-(1H-Pyrazol-1-yl)phenyl)-1-(4-methoxyphenyl)propan-1-one (5j):**

The title compound was prepared from tertiary allylic alcohol **4j** (0.20 mmol, 61.2 mg), The reaction mixture was allowed to stir at 100 °C for 24 h and was purified by column chromatography (5:1 = petroleum ether: ethyl acetate) to give a light yellow oil; 43.5 mg, 71% yield;  $^1\text{H}$  NMR (500 MHz,  $\text{CDCl}_3$ )  $\delta$  7.86 (d,  $J$  = 8.7 Hz, 2H), 7.70 (s, 1H), 7.63 (d,  $J$  = 2.0 Hz, 1H), 7.40 (d,  $J$  = 7.6 Hz, 1H), 7.37 – 7.33 (m, 1H), 7.30 (d,  $J$  = 4.1 Hz, 2H), 6.88 (d,  $J$  = 8.7 Hz, 2H), 6.43 (s, 1H), 3.83 (s, 3H), 3.10 – 3.06 (m, 2H), 2.99 – 2.95 (m, 2H);  $^{13}\text{C}$  NMR (126 MHz,  $\text{CDCl}_3$ )  $\delta$  197.8, 163.4, 140.4, 139.8, 137.7, 130.8, 130.8, 130.4, 129.8, 128.9, 127.0, 126.6, 113.7, 106.5, 55.5, 39.4, 26.8; HR-MS [ESI-MS(+)] calcd for  $[\text{M} + \text{H}]^+$ :  $\text{C}_{19}\text{H}_{19}\text{N}_2\text{O}_2$ : 307.1441, found: 307.1444; IR (KBr): 3124, 2939, 2845, 1672, 1595, 1508, 1445, 1312, 1260, 1211, 1161, 1022, 977, 938, 836, 768  $\text{cm}^{-1}$ .

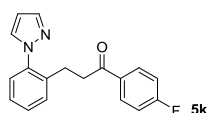

**3-(2-(1H-Pyrazol-1-yl)phenyl)-1-(4-fluorophenyl)propan-1-one (5k):** The title compound was prepared from tertiary allylic alcohol **4k** (0.20 mmol, 58.8 mg), The reaction mixture was allowed to stir at 100 °C for 24 h and was purified by column chromatography (10:1 = petroleum ether: ethyl acetate) to

give a light yellow oil; 50.5 mg, 86% yield;  $^1\text{H}$  NMR (400 MHz,  $\text{CDCl}_3$ )  $\delta$  7.95 – 7.90 (m, 2H), 7.73 (d,  $J$  = 1.7 Hz, 1H), 7.66 (d,  $J$  = 2.3 Hz, 1H), 7.44 – 7.36 (m, 2H), 7.35 – 7.30 (m, 2H), 7.10 (t,  $J$  = 8.6 Hz, 2H), 6.47 (t,  $J$  = 2.1 Hz, 1H), 3.17 – 3.12 (m, 2H), 3.02 – 2.97 (m, 2H);  $^{13}\text{C}$  NMR (101 MHz,  $\text{CDCl}_3$ )  $\delta$  197.7, 165.7 (d,  $J$  = 255.5,  $^1J_{\text{CF}}$ ), 140.5, 139.8, 137.4, 133.1 (d,  $J$  = 3.0,  $^3J_{\text{CF}}$ ), 130.9 (d,  $J$  = 6.1,  $^3J_{\text{CF}}$ ), 130.8 (d,  $J$  = 2.0,  $^3J_{\text{CF}}$ ), 128.9, 127.2, 126.6, 115.7, 115.5, 106.6, 39.8, 26.7; HR-MS [ESI-MS(+)] calcd for  $[\text{M} + \text{H}]^+$ :  $\text{C}_{18}\text{H}_{16}\text{FN}_2\text{O}$ : 295.1241, found: 295.1248; IR (KBr): 3123, 3064, 2915, 1683, 1594, 1506, 1399, 1296, 1205, 1155, 980, 939, 842, 767  $\text{cm}^{-1}$ .

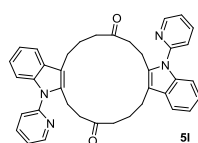

**5,16-Di(pyridin-2-yl)-5,6,7,9,10,11,16,17,18,20,21,22-dodecahydrocyclohexadeca[1,2-b:9,10-b']diindole-8,19-dione (5l):** The title compound was prepared from tertiary allylic alcohol **4l** (0.20 mmol, 58.0 mg) and was purified by column chromatography (5:1 = petroleum ether: ethyl acetate) to

give a white solid; m.p. 197.1 – 198.7 °C; 23.2 mg, 40% yield;  $^1\text{H}$  NMR (500 MHz,  $\text{CDCl}_3$ )  $\delta$  8.64 – 8.58 (m, 2H), 7.89 – 7.86 (m, 2H), 7.53 – 7.51 (m, 2H), 7.41 (d,  $J$  = 7.9 Hz, 2H), 7.32 – 7.30 (m,

2H), 7.29 – 7.26 (m, 2H), 7.14 – 7.09 (m, 4H), 3.14 – 3.07 (m, 4H), 2.82 (t,  $J = 7.4$  Hz, 4H), 2.60 – 2.54 (m, 4H), 2.41 (t,  $J = 6.4$  Hz, 4H), 2.01 – 1.95 (m, 4H);  $^{13}\text{C}$  NMR (126 MHz,  $\text{CDCl}_3$ )  $\delta$  209.5, 151.5, 149.8, 138.5, 136.9, 136.2, 128.5, 122.1, 121.0, 120.3, 119.5, 118.6, 114.0, 110.0, 42.8, 41.5, 24.5, 23.6, 19.2; HR-MS [ESI-MS(+)] calcd for  $[\text{M} + \text{H}]^+$ :  $\text{C}_{38}\text{H}_{37}\text{N}_4\text{O}_2$ : 581.2911, found: 581.2907; IR (KBr): 2924, 2854, 1709, 1585, 1472, 1459, 1437, 1369, 1321, 1225, 1147, 993, 782, 741  $\text{cm}^{-1}$ .

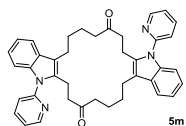

**5,17-Di(pyridin-2-yl)-6,7,10,11,12,17,18,19,21,22,23,24-dodecahydrocyclooctadeca[1,2-b:10,11-b']diindole-8,20(5H,9H)-dione (5m):** The title compound was prepared from tertiary allylic alcohol **4m** (0.20 mmol, 60.8 mg) and was purified by column chromatography (5:1 = petroleum ether: ethyl acetate) to

give a white solid; m.p. 234.8 – 236.0  $^{\circ}\text{C}$ ; 37.7 mg, 62% yield;  $^1\text{H}$  NMR (400 MHz,  $\text{CDCl}_3$ )  $\delta$  8.62 (d,  $J = 4.5$  Hz, 2H), 7.90 (t,  $J = 7.6$  Hz, 2H), 7.59 – 7.51 (m, 2H), 7.46 (d,  $J = 8.0$  Hz, 2H), 7.35 – 7.29 (m, 4H), 7.15 – 7.13 (m, 4H), 3.16 – 3.07 (m, 4H), 2.79 (t,  $J = 6.9$  Hz, 4H), 2.58 – 2.49 (m, 4H), 2.34 (t,  $J = 7.0$  Hz, 4H), 1.71 – 1.64 (m, 4H), 1.63 (d,  $J = 11.3$  Hz, 4H);  $^{13}\text{C}$  NMR (101 MHz,  $\text{CDCl}_3$ )  $\delta$  209.7, 151.6, 149.7, 138.4, 136.8, 136.1, 128.6, 122.0, 121.9, 120.9, 120.2, 118.6, 114.3, 109.9, 42.7, 42.4, 29.5, 24.0, 23.9, 18.8; HR-MS [ESI-MS(+)] calcd for  $[\text{M} + \text{H}]^+$ :  $\text{C}_{40}\text{H}_{41}\text{N}_4\text{O}_2$ : 609.3224, found: 609.3218; IR (KBr): 3050, 2920, 1867, 1790, 1747, 1714, 1681, 1555, 1540, 1471, 1455, 1434, 1361, 1338, 1147, 992, 777, 741  $\text{cm}^{-1}$ .

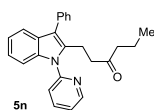

**1-(3-Phenyl-1-(pyridin-2-yl)-1H-indol-2-yl)hexan-3-one (5n):** brown oil; 11.5 mg, 31% yield;  $^1\text{H}$  NMR (500 MHz,  $\text{CDCl}_3$ )  $\delta$  8.65 (dd,  $J = 4.7, 1.5$  Hz, 1H), 7.95 – 7.91 (m, 1H), 7.62 – 7.56 (m, 1H), 7.55 – 7.50 (m, 3H), 7.47 (t,  $J = 7.6$  Hz, 2H), 7.38 – 7.32 (m, 3H), 7.21 – 7.13 (m, 2H), 3.23 – 3.17 (m, 2H), 2.54 – 2.48 (m, 2H), 2.14 (t,  $J = 7.4$  Hz, 2H), 1.47 – 1.39 (m, 2H), 0.78 (t,  $J = 7.4$  Hz, 3H);  $^{13}\text{C}$  NMR (126 MHz,  $\text{CDCl}_3$ )  $\delta$  209.7, 151.4, 149.8, 138.6, 136.7, 136.1, 134.8, 129.9, 128.6, 128.3, 126.6, 122.5, 122.4, 121.4, 121.0, 119.2, 117.6, 110.1, 44.4, 42.6, 19.7, 17.3, 13.6; HR-MS [ESI-MS(+)] calcd for  $[\text{M} + \text{H}]^+$ :  $\text{C}_{25}\text{H}_{25}\text{N}_2\text{O}$ : 369.1961, found: 369.1948; IR (KBr): 3054, 2959, 2926, 2872, 1711, 1588, 1470, 1458, 1436, 1370, 1189, 1148, 1023, 771, 743, 703  $\text{cm}^{-1}$ .

### 1.5. Detail characterization for the sigmatropic rearrangement products 7

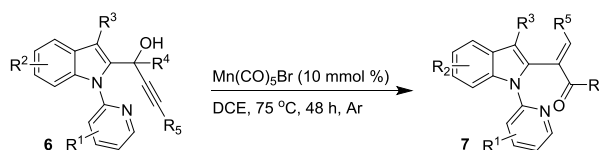

An oven-dried sealed tube charged propargyl alcohols **6** (0.20 mmol),  $\text{Mn}(\text{CO})_5\text{Br}$  (0.02 mmol, 10 mol %) and DCE (2.0 mL) under Ar atmosphere. The reaction mixture was then allowed to stir at 75  $^{\circ}\text{C}$  for 48 h. After the reaction mixture was cooled down, the corresponding reaction mixture was purified by flash chromatography on silica gel using ethyl acetate/petroleum ether (1: 10) as eluent to afford the desired products **7**.

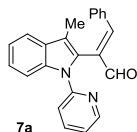

**(E)-2-(3-Methyl-1-(pyridin-2-yl)-1H-indol-2-yl)-3-phenylacrylaldehyde (7a):** The title compound was prepared from propargyl alcohol **6a** (0.20 mmol, 67.6 mg) and was purified by column chromatography (10: 1 = petroleum ether: ethyl acetate) to give a yellow solid; m.p. 135.1 – 137.6  $^{\circ}\text{C}$ ; 49.3 mg, 73% yield;  $^1\text{H}$  NMR (400 MHz,  $\text{CDCl}_3$ )  $\delta$  9.68 (s, 1H), 8.45 (d,  $J = 4.8$  Hz, 1H), 7.72 – 7.68 (m, 2H), 7.65 (d,  $J = 7.7$  Hz, 1H), 7.58 (s, 1H), 7.34 (d,  $J = 8.5$  Hz, 3H), 7.31 – 7.28 (m, 2H), 7.25 (t,  $J = 7.5$  Hz, 3H), 7.14 – 7.11 (m, 1H), 2.09 (s, 3H);  $^{13}\text{C}$  NMR (101 MHz,  $\text{CDCl}_3$ )  $\delta$  192.7, 151.4, 150.5, 149.0, 137.8,

136.8, 134.4, 132.9, 130.6, 130.3, 129.5, 128.8, 128.5, 123.4, 121.0, 120.6, 119.5, 119.3, 114.1, 111.2, 9.3; HR-MS [ESI-MS(+)] calcd for  $[M + H]^+$ :  $C_{23}H_{19}N_2O$ : 339.1492, found: 339.1479; IR (KBr): 3447, 3055, 2920, 2852, 2713, 1686, 1587, 1470, 1448, 1437, 1363, 1321, 1224, 1149, 1083, 778, 740,  $695\text{ cm}^{-1}$ .

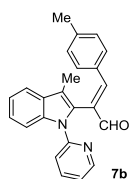

**(E)-2-(3-Methyl-1-(pyridin-2-yl)-1H-indol-2-yl)-3-(p-tolyl)acrylaldehyde (7b):**

The title compound was prepared from propargyl alcohol **6b** (0.20 mmol, 70.4 mg), the reaction mixture was then allowed to stir at  $75\text{ }^{\circ}\text{C}$  for 72 h and was purified by column chromatography (10: 1 = petroleum ether: ethyl acetate) to give a yellow oil; 59.1 mg, 84% yield;  $^1\text{H}$  NMR (400 MHz,  $\text{CDCl}_3$ )  $\delta$  9.66 (s, 1H), 8.46 (d,  $J = 4.8\text{ Hz}$ , 1H), 7.74 – 7.64 (m, 3H), 7.56 (s, 1H), 7.31 – 7.24 (m, 5H), 7.15 – 7.10 (m, 1H), 7.07 (d,  $J = 8.0\text{ Hz}$ , 2H), 2.33 (s, 3H), 2.10 (s, 3H);  $^{13}\text{C}$  NMR (101 MHz,  $\text{CDCl}_3$ )  $\delta$  192.9, 151.4, 151.2, 149.0, 141.5, 137.8, 136.9, 131.9, 131.5, 130.5, 129.6, 129.5, 128.7, 123.3, 121.0, 120.6, 119.4, 119.3, 113.9, 111.3, 21.6, 9.3; HR-MS [ESI-MS(+)] calcd for  $[M + H]^+$ :  $C_{24}H_{21}N_2O$ : 353.1648, found: 353.1632; IR (KBr): 2922, 2854, 1681, 1661, 1558, 1470, 1455, 1437, 1363, 1331, 1224, 1184, 1149,  $741\text{ cm}^{-1}$ .

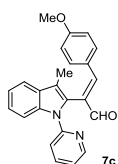

**(E)-3-(4-Methoxyphenyl)-2-(3-methyl-1-(pyridin-2-yl)-1H-indol-2-yl)acrylaldehyde (7c):**

The title compound was prepared from propargyl alcohol **6c** (0.20 mmol, 73.6 mg) and was purified by column chromatography (10: 1 = petroleum ether: ethyl acetate) to give a yellow solid; m.p.  $151.9 - 154.2\text{ }^{\circ}\text{C}$ ; 51.5 mg, 70% yield;  $^1\text{H}$  NMR (400 MHz,  $\text{CDCl}_3$ )  $\delta$  9.64 (s, 1H), 8.46 (d,  $J = 4.5\text{ Hz}$ , 1H), 7.74 – 7.65 (m, 3H), 7.53 (s, 1H), 7.32 – 7.24 (m, 5H), 7.13 (t,  $J = 6.1\text{ Hz}$ , 1H), 6.78 (d,  $J = 7.9\text{ Hz}$ , 2H), 3.79 (s, 3H), 2.13 (s, 3H);  $^{13}\text{C}$  NMR (101 MHz,  $\text{CDCl}_3$ )  $\delta$  192.9, 161.8, 151.4, 151.3, 148.9, 137.8, 136.9, 132.5, 130.5, 129.5, 128.8, 126.8, 123.2, 121.1, 120.6, 119.4, 119.4, 114.4, 113.8, 111.4, 55.4, 9.3; HR-MS [ESI-MS(+)] calcd for  $[M + H]^+$ :  $C_{24}H_{21}N_2O_2$ : 369.1598, found: 369.1563; IR (KBr): 3054, 2932, 2837, 2714, 1681, 1598, 1509, 1470, 1457, 1438, 1363, 1306, 1259, 1224, 1176, 1155, 1097, 1028, 831, 778,  $741\text{ cm}^{-1}$ .

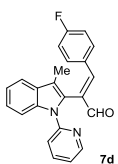

**(E)-3-(4-Fluorophenyl)-2-(3-methyl-1-(pyridin-2-yl)-1H-indol-2-yl)acrylaldehyde (7d):**

The title compound was prepared from propargyl alcohol **6d** (0.20 mmol, 71.2 mg) and was purified by column chromatography (10: 1 = petroleum ether: ethyl acetate) to give a yellow oil; 44.9 mg, 63% yield;  $^1\text{H}$  NMR (400 MHz,  $\text{CDCl}_3$ )  $\delta$  9.66 (s, 1H), 8.43 (dd,  $J = 4.8, 1.1\text{ Hz}$ , 1H), 7.74 – 7.70 (m, 1H), 7.66 (t,  $J = 8.1\text{ Hz}$ , 2H), 7.53 (s, 1H), 7.34 – 7.24 (m, 5H), 7.15 – 7.12 (m, 1H), 6.94 (t,  $J = 8.7\text{ Hz}$ , 2H), 2.09 (s, 3H);  $^{13}\text{C}$  NMR (101 MHz,  $\text{CDCl}_3$ )  $\delta$  192.5, 163.8 (d,  $J = 254.5, ^1J_{\text{CF}}$ ), 151.3, 149.1, 149.0, 137.9, 136.8, 132.6 (d,  $J = 2.0, ^3J_{\text{CF}}$ ), 132.5, 132.4, 130.5 (d,  $J = 4.0, ^3J_{\text{CF}}$ ), 129.4, 128.3, 123.5, 121.1, 120.7, 119.4 (d,  $J = 20.0, ^2J_{\text{CF}}$ ), 116.0 (d,  $J = 21.2, ^2J_{\text{CF}}$ ), 114.1, 111.1, 9.2; HR-MS [ESI-MS(+)] calcd for  $[M + H]^+$ :  $C_{23}H_{18}FN_2O$ : 357.1398, found: 357.1386; IR (KBr): 3057, 2921, 2855, 1687, 1597, 1506, 1470, 1457, 1438, 1363, 1234, 1157, 1081,  $779\text{ cm}^{-1}$ .

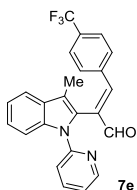

**(E)-2-(3-Methyl-1-(pyridin-2-yl)-1H-indol-2-yl)-3-(4-(trifluoromethyl)phenyl)acrylaldehyde (7e):**

The title compound was prepared from propargyl alcohol **6e** (0.20 mmol, 81.2 mg), the reaction mixture was then allowed to stir at  $75\text{ }^{\circ}\text{C}$  for 72 h and was purified by column chromatography (10: 1 = petroleum ether: ethyl acetate) to give a brown oil; 44.7 mg, 55% yield;  $^1\text{H}$  NMR (500 MHz,  $\text{CDCl}_3$ )  $\delta$  9.66 (s, 1H), 8.38 (d,  $J = 4.4\text{ Hz}$ , 1H), 7.71 (t,  $J = 7.7\text{ Hz}$ , 1H), 7.62 (t,  $J = 7.6\text{ Hz}$ , 2H), 7.54 (s, 1H), 7.46 (d,  $J = 8.3\text{ Hz}$ , 2H), 7.41 (d,  $J = 8.2\text{ Hz}$ , 2H), 7.34 – 7.27 (m, 2H), 7.25 – 7.21 (m, 1H),

7.14 – 7.08 (m, 1H), 2.01 (s, 3H);  $^{13}\text{C}$  NMR (126 MHz,  $\text{CDCl}_3$ )  $\delta$  192.2, 151.2, 149.0, 147.2, 138.0, 137.8, 136.7, 134.9, 131.5 (d,  $J = 33.1$ ,  $^2J_{\text{CF}}$ ), 130.2, 129.4, 128.1, 125.6 (q,  $J = 3.8$ ,  $^3J_{\text{CF}}$ ), 123.7 (d,  $J = 273.4$ ,  $^1J_{\text{CF}}$ ), 123.7, 121.1, 120.9, 119.6, 119.1, 114.4, 110.9, 9.2; HR-MS [ESI-MS(+)] calcd for  $[\text{M} + \text{H}]^+$ :  $\text{C}_{24}\text{H}_{18}\text{F}_3\text{N}_2\text{O}$ : 407.1366, found: 407.1351; IR (KBr): 3055, 2923, 1691, 1588, 1471, 1457, 1439, 1364, 1323, 1225, 1168, 1126, 1068, 1015, 899, 831, 778  $\text{cm}^{-1}$ .

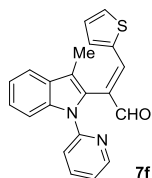

**(E)-2-(3-Methyl-1-(pyridin-2-yl)-1H-indol-2-yl)-3-(thiophen-2-yl)acrylaldehyde (7f):**

The title compound was prepared from propargyl alcohol **6f** (0.20 mmol, 68.8 mg) and was purified by column chromatography (10:1 = petroleum ether: ethyl acetate) to give a yellow solid; m.p. 179.3 – 182.1  $^{\circ}\text{C}$ ; 51.6 mg, 75% yield;  $^1\text{H}$  NMR (400 MHz,  $\text{CDCl}_3$ )  $\delta$  9.71 (s, 1H), 8.47 (dd,  $J = 4.9$ , 1.2 Hz, 1H), 7.82 (s, 1H), 7.74 (d,  $J = 8.2$  Hz, 1H), 7.72 – 7.67 (m, 2H), 7.38 (d,  $J = 5.0$  Hz, 1H), 7.34 – 7.27 (m, 4H), 7.15 – 7.11 (m, 1H), 7.01 – 6.99 (m, 1H), 2.21 (s, 3H);  $^{13}\text{C}$  NMR (101 MHz,  $\text{CDCl}_3$ )  $\delta$  191.9, 151.2, 149.0, 142.9, 137.9, 137.1, 134.7, 133.6, 129.8, 129.7, 127.5, 127.3, 123.6, 121.1, 120.7, 119.5, 119.1, 115.3, 111.5, 9.3; HR-MS [ESI-MS(+)] calcd for  $[\text{M} + \text{H}]^+$ :  $\text{C}_{21}\text{H}_{17}\text{N}_2\text{OS}$ : 345.1056, found: 345.1044; IR (KBr): 3056, 2920, 2856, 1677, 1587, 1470, 1456, 1437, 1363, 1256, 1223, 1141, 1082, 1048, 857, 778, 741  $\text{cm}^{-1}$ .

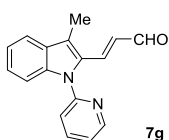

**(E)-3-(3-Methyl-1-(pyridin-2-yl)-1H-indol-2-yl)acrylaldehyde (7g):**

The title compound was prepared from propargyl alcohol **6g** (0.20 mmol, 52.4 mg) and was purified by column chromatography (10: 1 = petroleum ether: ethyl acetate) to give a brown oil; 27.8 mg, 38% yield;  $^1\text{H}$  NMR (500 MHz,  $\text{CDCl}_3$ )  $\delta$  9.52 (d,  $J = 7.7$  Hz, 1H), 8.70 (d,  $J = 4.7$  Hz, 1H), 7.94 (t,  $J = 7.7$  Hz, 1H), 7.69 (d,  $J = 8.0$  Hz, 1H), 7.59 (d,  $J = 16.1$  Hz, 1H), 7.40 (dd,  $J = 11.3$ , 6.5 Hz, 3H), 7.30 (t,  $J = 7.6$  Hz, 1H), 7.22 (t,  $J = 7.5$  Hz, 1H), 6.10 (dd,  $J = 16.1$ , 7.7 Hz, 1H), 2.58 (s, 3H);  $^{13}\text{C}$  NMR (126 MHz,  $\text{CDCl}_3$ )  $\delta$  193.5, 151.1, 150.0, 140.8, 139.2, 138.7, 130.6, 129.5, 128.9, 128.3, 126.1, 122.8, 121.7, 121.5, 120.2, 110.9, 10.6; HR-MS [ESI-MS(+)] calcd for  $[\text{M} + \text{H}]^+$ :  $\text{C}_{17}\text{H}_{15}\text{N}_2\text{O}$ : 263.1179, found: 263.1177; IR (KBr): 2924, 1715, 1618, 1556, 1541, 1506, 1488, 1472, 1455, 1396, 1361, 1338, 1150, 740  $\text{cm}^{-1}$ .

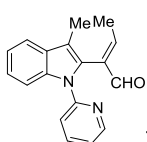

**(E)-2-(3-Methyl-1-(pyridin-2-yl)-1H-indol-2-yl)but-2-enal (7h):**

The title compound was prepared from propargyl alcohol **6h** (0.20 mmol, 55.2 mg) and was purified by column chromatography (10: 1 = petroleum ether: ethyl acetate) to give a brown oil; 19.4 mg, 35% yield;  $^1\text{H}$  NMR (500 MHz,  $\text{CDCl}_3$ )  $\delta$  9.50 (s, 1H), 8.50 (d,  $J = 4.7$  Hz, 1H), 7.75 – 7.72 (m, 1H), 7.62 – 7.61 (m, 2H), 7.26 – 7.15 (m, 4H), 7.01 (q,  $J = 7.0$  Hz, 1H), 2.18 (s, 3H), 1.88 (d,  $J = 7.0$  Hz, 3H);  $^{13}\text{C}$  NMR (126 MHz,  $\text{CDCl}_3$ )  $\delta$  192.2, 153.4, 151.6, 149.1, 137.9, 137.5, 136.9, 129.3, 127.5, 123.2, 121.2, 120.6, 119.6, 119.1, 114.5, 111.0, 16.5, 9.4; HR-MS [ESI-MS(+)] calcd for  $[\text{M} + \text{H}]^+$ :  $\text{C}_{18}\text{H}_{17}\text{N}_2\text{O}$ : 277.1335, found: 277.1332; IR (KBr): 3054, 2921, 2854, 1689, 1585, 1468, 1361, 1225, 1152, 745  $\text{cm}^{-1}$ .

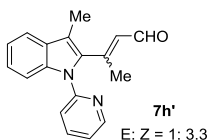

**3-(3-Methyl-1-(pyridin-2-yl)-1H-indol-2-yl)but-2-enal (7h'):**

The title compound was prepared from propargyl alcohol **6h** (0.20 mmol, 55.2 mg) and was purified by column chromatography (10: 1 = petroleum ether: ethyl acetate) to give a yellow oil; 34.3 mg, 62% yield (E: Z = 1: 3.3);  $^1\text{H}$  NMR (500 MHz,  $\text{CDCl}_3$ )  $\delta$  10.11 (d,  $J = 7.9$  Hz, 0.33H), 9.67 (d,  $J = 8.1$  Hz, 1H), 8.62 (d,  $J = 5.0$  Hz, 0.33H), 8.60 (d,  $J = 4.2$  Hz, 1H), 7.82 (t,  $J = 7.3$  Hz, 1.37H), 7.69 (d,  $J = 8.3$  Hz, 1H), 7.63 (d,  $J = 7.9$  Hz, 1H), 7.33 – 7.21 (m, 6H), 6.24 (d,  $J = 8.1$  Hz, 1.33H), 2.42 (s, 1H), 2.30 (s, 3H), 2.10 (s, 1H), 1.89 (s, 3H);  $^{13}\text{C}$  NMR (126 MHz,  $\text{CDCl}_3$ )  $\delta$  193.3, 190.8, 152.3, 151.6, 149.6, 138.5, 138.5, 137.5, 132.8, 131.9, 131.1, 129.4, 129.1, 124.8, 124.7, 121.6, 121.4, 121.4, 119.9, 119.7, 119.7,

119.2, 117.1, 111.2, 111.1, 24.8, 18.2, 10.3, 9.9; HR-MS [ESI-MS(+)] calcd for  $[M + H]^+$ :  $C_{18}H_{17}N_2O$ : 277.1335, found: 277.1333; IR (KBr): 3053, 2922, 2852, 1669, 1583, 1466, 1359, 1222, 1163, 1006,  $746\text{ cm}^{-1}$ .

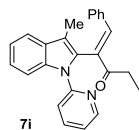

**(E)-2-(3-Methyl-1-(pyridin-2-yl)-1H-indol-2-yl)-1-phenylpent-1-en-3-one (7i):**

The title compound was prepared from propargyl alcohol **6i** (0.20 mmol, 73.2 mg) and was purified by column chromatography (10: 1 = petroleum ether: acetone) to give a orange solid; m.p.  $165.6 - 166.7\text{ }^{\circ}\text{C}$ ; 48.3 mg, 66% yield;  $^1\text{H}$  NMR (400 MHz,  $\text{CDCl}_3$ )  $\delta$  8.39 (dd,  $J = 4.9, 1.3\text{ Hz}$ , 1H), 7.72 – 7.66 (m, 2H), 7.61 – 7.57 (m, 1H), 7.33 – 7.21 (m, 4H), 7.19 – 7.11 (m, 4H), 7.06 – 7.01 (m, 1H), 6.70 (s, 1H), 2.62 – 2.41 (m, 2H), 2.26 (s, 3H), 1.03 (t,  $J = 7.3\text{ Hz}$ , 3H);  $^{13}\text{C}$  NMR (101 MHz,  $\text{CDCl}_3$ )  $\delta$  202.3, 151.3, 148.9, 143.8, 139.4, 137.6, 137.0, 132.8, 129.5, 129.3, 129.2, 128.3, 127.7, 123.9, 120.9, 119.7, 119.5, 115.9, 111.4, 35.3, 9.5, 8.4; HR-MS [ESI-MS(+)] calcd for  $[M + H]^+$ :  $C_{25}H_{23}N_2O$ : 367.1805, found: 367.1792; IR (KBr): 3054, 2970, 2929, 1688, 1657, 1588, 1470, 1455, 1437, 1363, 1223, 1184, 1120, 1041, 779, 742,  $694\text{ cm}^{-1}$ .

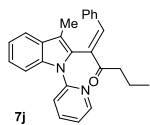

**(E)-2-(3-Methyl-1-(pyridin-2-yl)-1H-indol-2-yl)-1-phenylhex-1-en-3-one (7j):**

The title compound was prepared from propargyl alcohol **6j** (0.20 mmol, 76.0 mg) and was purified by column chromatography (10: 1 = petroleum ether: ethyl acetate) to give a orange solid; m.p.  $131.9 - 134.7\text{ }^{\circ}\text{C}$ ; 36.5 mg, 48% yield;  $^1\text{H}$  NMR (500 MHz,  $\text{CDCl}_3$ )  $\delta$  8.35 (d,  $J = 4.4\text{ Hz}$ , 1H), 7.66 (dd,  $J = 11.5, 8.0\text{ Hz}$ , 2H), 7.56 (t,  $J = 7.7\text{ Hz}$ , 1H), 7.29 – 7.18 (m, 4H), 7.14 (t,  $J = 7.4\text{ Hz}$ , 2H), 7.10 (d,  $J = 7.7\text{ Hz}$ , 2H), 7.02 – 6.98 (m, 1H), 6.65 (s, 1H), 2.56 – 2.47 (m, 1H), 2.38 – 2.32 (m, 1H), 2.22 (s, 3H), 1.60 – 1.51 (m, 2H), 0.82 (t,  $J = 7.4\text{ Hz}$ , 3H);  $^{13}\text{C}$  NMR (126 MHz,  $\text{CDCl}_3$ )  $\delta$  201.6, 151.4, 148.8, 143.8, 139.4, 137.6, 136.9, 132.8, 129.4, 129.2, 129.2, 128.3, 127.8, 123.9, 120.8, 120.8, 119.7, 119.5, 116.0, 111.4, 44.2, 17.8, 13.8, 9.6; HR-MS [ESI-MS(+)] calcd for  $[M + H]^+$ :  $C_{26}H_{25}N_2O$ : 381.1961, found: 381.1948; IR (KBr): 2958, 2924, 1680, 1588, 1470, 1455, 1437, 1362, 1224, 1183, 1054, 779,  $742\text{ cm}^{-1}$ .

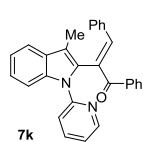

**(E)-2-(3-Methyl-1-(pyridin-2-yl)-1H-indol-2-yl)-1,3-diphenylprop-2-en-1-one (7k):**

The title compound was prepared from propargyl alcohol **6k** (0.20 mmol, 82.8 mg) and was purified by column chromatography (10: 1 = petroleum ether: ethyl acetate) to give a brown oil; 63.7 mg, 77% yield;  $^1\text{H}$  NMR (400 MHz,  $\text{CDCl}_3$ )  $\delta$  8.36 (d,  $J = 3.2\text{ Hz}$ , 1H), 8.02 (d,  $J = 7.9\text{ Hz}$ , 2H), 7.74 – 7.71 (m, 1H), 7.61 – 7.54 (m, 2H), 7.51 – 7.47 (m, 2H), 7.42 (t,  $J = 7.5\text{ Hz}$ , 2H), 7.35 (d,  $J = 0.8\text{ Hz}$ , 1H), 7.26 (s, 2H), 7.24 – 7.19 (m, 5H), 6.99 – 6.96 (m, 1H), 2.17 (d,  $J = 0.9\text{ Hz}$ , 3H);  $^{13}\text{C}$  NMR (101 MHz,  $\text{CDCl}_3$ )  $\delta$  191.2, 151.7, 148.6, 146.1, 139.7, 137.9, 137.6, 137.1, 133.1, 132.7, 129.6, 129.4, 129.2, 128.5, 128.4, 127.9, 126.2, 123.8, 120.7, 120.6, 120.2, 119.4, 115.8, 111.5, 9.8; HR-MS [ESI-MS(+)] calcd for  $[M + H]^+$ :  $C_{29}H_{23}N_2O$ : 415.1805, found: 415.1798; IR (KBr): 3055, 2922, 1656, 1588, 1470, 1448, 1437, 1380, 1363, 1266, 1223, 1017, 777, 743,  $695\text{ cm}^{-1}$ .

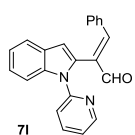

**(E)-3-Phenyl-2-(1-(pyridin-2-yl)-1H-indol-2-yl)acrylaldehyde (7l):**

The title compound was prepared from propargyl alcohol **6l** (0.20 mmol, 64.8 mg) and was purified by column chromatography (10: 1 = petroleum ether: ethyl acetate) to give a yellow solid; m.p.  $127.8 - 130.4\text{ }^{\circ}\text{C}$ ; 34.3 mg, 53% yield;  $^1\text{H}$  NMR (500 MHz,  $\text{CDCl}_3$ )  $\delta$  9.69 (s, 1H), 8.37 (dd,  $J = 4.8, 1.2\text{ Hz}$ , 1H), 7.66 (d,  $J = 7.7\text{ Hz}$ , 1H), 7.63 – 7.59 (m, 2H), 7.42 (s, 1H), 7.27 – 7.23 (m, 2H), 7.22 – 7.19 (m, 1H), 7.19 – 7.15 (m, 5H), 7.10 – 7.07 (m, 1H), 6.70 (s, 1H);  $^{13}\text{C}$  NMR (126 MHz,  $\text{CDCl}_3$ )  $\delta$  192.6, 150.8, 150.3, 148.9, 137.7, 137.1, 133.9, 133.3,

131.4, 130.4, 130.4, 128.8, 128.8, 123.2, 121.3, 121.3, 121.2, 119.7, 111.3, 107.0; HR-MS [ESI-MS(+)] calcd for  $[M + H]^+$ :  $C_{22}H_{17}N_2O$ : 325.1335, found: 325.1342; IR (KBr): 3056, 2924, 2853, 1687, 1586, 1469, 1446, 1437, 1374, 1314, 1213, 1166, 1017, 775, 744  $cm^{-1}$ .

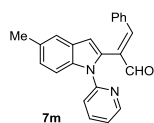

**(E)-2-(5-Methyl-1-(pyridin-2-yl)-1H-indol-2-yl)-3-phenylacrylaldehyde (7m):**

The title compound was prepared from propargyl alcohol **6m** (0.20 mmol, 67.6 mg) and was purified by column chromatography (10: 1 = petroleum ether: ethyl acetate) to give a brown oil; 35.2 mg, 52% yield;  $^1H$  NMR (400 MHz,  $CDCl_3$ )  $\delta$  9.73 (s, 1H), 8.40 (dd,  $J = 4.9, 1.2$  Hz, 1H), 7.67 – 7.62 (m, 1H), 7.54 (d,  $J = 8.5$  Hz, 1H), 7.48 (s, 1H), 7.44 (s, 1H), 7.31 – 7.27 (m, 1H), 7.22 – 7.17 (m, 5H), 7.12 – 7.08 (m, 2H), 6.66 (s, 1H), 2.51 (s, 3H);  $^{13}C$  NMR (101 MHz,  $CDCl_3$ )  $\delta$  192.6, 151.0, 149.9, 148.9, 137.6, 135.4, 134.0, 133.4, 131.4, 130.5, 130.4, 129.1, 128.5, 124.8, 121.1, 120.9, 119.5, 111.0, 106.7, 21.4; HR-MS [ESI-MS(+)] calcd for  $[M + H]^+$ :  $C_{23}H_{19}N_2O$ : 339.1492, found: 339.1487; IR (KBr): 3019, 2920, 2856, 1686, 1587, 1470, 1437, 1376, 1215, 1179, 1143, 1100, 1005, 771, 744, 691  $cm^{-1}$ .

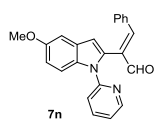

**(E)-2-(5-Methoxy-1-(pyridin-2-yl)-1H-indol-2-yl)-3-phenylacrylaldehyde (7n):**

The title compound was prepared from propargyl alcohol **6n** (0.20 mmol, 70.8 mg) and was purified by column chromatography (10: 1 = petroleum ether: ethyl acetate) to give a yellow oil; 42.5 mg, 60% yield;  $^1H$  NMR (400 MHz,  $CDCl_3$ )  $\delta$  9.73 (s, 1H), 8.39 (dd,  $J = 4.8, 1.2$  Hz, 1H), 7.66 – 7.62 (m, 1H), 7.55 (d,  $J = 9.0$  Hz, 1H), 7.44 (s, 1H), 7.31 – 7.27 (m, 1H), 7.23 – 7.18 (m, 4H), 7.16 – 7.07 (m, 3H), 6.94 – 6.91 (m, 1H), 6.65 (s, 1H), 3.90 (s, 3H);  $^{13}C$  NMR (101 MHz,  $CDCl_3$ )  $\delta$  192.6, 155.1, 150.9, 150.2, 148.9, 137.7, 133.9, 133.3, 132.2, 131.6, 130.4, 130.4, 129.3, 128.6, 121.1, 119.4, 113.4, 112.2, 106.8, 102.7, 55.8; HR-MS [ESI-MS(+)] calcd for  $[M + H]^+$ :  $C_{23}H_{19}N_2O_2$ : 355.1441, found: 355.1430; IR (KBr): 2923, 2843, 1687, 1588, 1470, 1488, 1403, 1338, 1204, 1175, 1147, 1031, 769  $cm^{-1}$ .

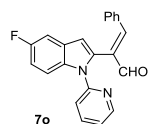

**(E)-2-(5-Fluoro-1-(pyridin-2-yl)-1H-indol-2-yl)-3-phenylacrylaldehyde (7o):**

The title compound was prepared from propargyl alcohol **6o** (0.20 mmol, 68.4 mg) and was purified by column chromatography (10: 1 = petroleum ether: ethyl acetate) to give a brown oil; 34.9 mg, 51% yield;  $^1H$  NMR (400 MHz,  $CDCl_3$ )  $\delta$  9.72 (s, 1H), 8.40 (dd,  $J = 4.8, 1.1$  Hz, 1H), 7.69 – 7.64 (m, 1H), 7.56 (dd,  $J = 9.0, 4.4$  Hz, 1H), 7.46 (s, 1H), 7.34 – 7.29 (m, 2H), 7.24 – 7.12 (m, 6H), 7.04 – 6.98 m, 1H), 6.67 (s, 1H);  $^{13}C$  NMR (101 MHz,  $CDCl_3$ )  $\delta$  192.5, 158.6 (d,  $J = 237.4, ^1J_{CF}$ ), 151.1, 150.7, 149.0, 137.8, 133.7, 133.1, 132.8, 130.7, 130.4, 129.1 (d,  $J = 2.0, ^3J_{CF}$ ), 128.6, 121.5, 119.6, 112.3 (d,  $J = 10.1, ^2J_{CF}$ ), 111.5 (d,  $J = 15.2, ^2J_{CF}$ ), 106.7 (d,  $J = 5.1, ^3J_{CF}$ ), 106.1, 105.9; HR-MS [ESI-MS(+)] calcd for  $[M + H]^+$ :  $C_{22}H_{16}FN_2O$ : 343.1241, found: 343.1233; IR (KBr): 3062, 2925, 2845, 1686, 1588, 1470, 1447, 1437, 1404, 1379, 1180, 1137, 1005, 773, 745, 691  $cm^{-1}$ .

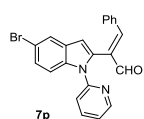

**(E)-2-(5-Bromo-1-(pyridin-2-yl)-1H-indol-2-yl)-3-phenylacrylaldehyde (7p):**

The title compound was prepared from propargyl alcohol **6p** (0.20 mmol, 80.4 mg) and was purified by column chromatography (10: 1 = petroleum ether: ethyl acetate) to give a yellow oil; 37.0 mg, 46% yield;  $^1H$  NMR (400 MHz,  $CDCl_3$ )  $\delta$  9.70 (s, 1H), 8.40 (dd,  $J = 5.5, 1.8$  Hz, 1H), 7.81 (d,  $J = 1.8$  Hz, 1H), 7.69 – 7.65 (m, 1H), 7.50 (d,  $J = 8.8$  Hz, 1H), 7.47 (s, 1H), 7.35 – 7.28 (m, 2H), 7.24 – 7.12 (m, 6H), 6.65 (s, 1H);  $^{13}C$  NMR (101 MHz,  $CDCl_3$ )  $\delta$  192.4, 151.3, 150.4, 149.1, 137.9, 135.7, 133.6, 132.9, 132.5, 130.7, 130.4, 130.6, 128.6, 126.0, 123.6, 121.7, 119.7, 114.3, 112.9, 106.2; HR-MS [ESI-MS(+)] calcd for  $[M + H]^+$ :  $C_{22}H_{16}BrN_2O$ : 403.0441, found: 403.0429; IR (KBr): 3061, 2923, 2849, 1687, 1586, 1537, 1470, 1443, 1379, 1315, 1208, 1160, 1105, 1001, 869, 745, 692  $cm^{-1}$ .

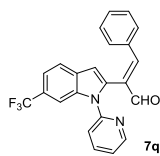

**(E)-3-Phenyl-2-(1-(pyridin-2-yl)-6-(trifluoromethyl)-1H-indol-2-yl)acrylaldehyde (7q):**

The title compound was prepared from propargyl alcohol **6q** (0.20 mmol, 78.4 mg) and was purified by column chromatography (10: 1 = petroleum ether: ethyl acetate) to give a yellow oil; 29.8 mg, 38% yield;  $^1\text{H}$  NMR (400 MHz,  $\text{CDCl}_3$ )  $\delta$  9.71 (s, 1H), 8.47 – 8.42 (m, 1H), 7.88 (s, 1H), 7.77 (d,  $J$  = 8.3 Hz, 1H), 7.74 – 7.69 (m, 1H), 7.50 (s, 1H), 7.47 (d,  $J$  = 7.4 Hz, 1H), 7.35 – 7.30 (m, 1H), 7.26 – 7.16 (m, 6H), 6.76 (s, 1H);  $^{13}\text{C}$  NMR (101 MHz,  $\text{CDCl}_3$ )  $\delta$  192.2, 151.7, 150.2, 149.2, 138.1, 136.1, 134.1, 133.5, 132.8, 130.9, 130.8, 130.4, 128.7, 125.2 (d,  $J$  = 32.3,  $^2J_{\text{CF}}$ ), 125.1 (d,  $J$  = 237.4,  $^1J_{\text{CF}}$ ), 122.0, 121.6, 119.8, 117.9 (q,  $J$  = 4.0,  $^3J_{\text{CF}}$ ), 109.0 (q,  $J$  = 5.1,  $^3J_{\text{CF}}$ ), 106.7; HR-MS [ESI-MS(+)] calcd for  $[\text{M} + \text{H}]^+$ :  $\text{C}_{23}\text{H}_{16}\text{F}_3\text{N}_2\text{O}$ : 393.1209, found: 393.1196; IR (KBr): 3063, 2924, 2852, 1688, 1588, 1470, 1439, 1345, 1331, 1301, 1264, 1231, 1162, 1116, 1058, 948, 830, 747  $\text{cm}^{-1}$ .

**(1R,2S,5R)-2-Isopropyl-5-methylcyclohexyl 4-((E)-2-(3-methyl-1-(pyridin-2-yl)-1H-indol-2-yl)-3-oxoprop-1-en-1-yl)benzoate (7r):**

The title compound was prepared from propargyl alcohol **6r** (0.20 mmol, 104.0 mg) and was purified by column chromatography (5: 1 = petroleum ether: ethyl acetate) to give a yellow oil; 76.0 mg, 73% yield;  $^1\text{H}$  NMR (400 MHz,  $\text{CDCl}_3$ )  $\delta$  9.69 (d,  $J$  = 8.0 Hz, 1H), 8.45 – 8.42 (m, 1H), 7.94 – 7.89 (m, 2H), 7.77 – 7.73 (m, 1H), 7.69 – 7.63 (m, 2H), 7.60 (d,  $J$  = 5.9 Hz, 1H), 7.46 – 7.34 (m, 3H), 7.34 – 7.23 (m, 3H), 7.17 – 7.12 (m, 1H), 4.95 – 4.89 (m, 1H), 2.12 (d,  $J$  = 12.2 Hz, 1H), 2.06 (d,  $J$  = 12.2 Hz, 3H), 1.98 – 1.89 (m, 1H), 1.74 (d,  $J$  = 10.8 Hz, 2H), 1.59 – 1.50 (m, 2H), 1.16 – 1.04 (m, 2H), 0.96 – 0.91 (m, 7H), 0.80 (d,  $J$  = 6.9 Hz, 3H);  $^{13}\text{C}$  NMR (101 MHz,  $\text{CDCl}_3$ )  $\delta$  192.4, 165.4, 151.3, 151.2, 149.0, 149.0, 148.1, 148.0, 138.5, 138.4, 138.0, 137.9, 136.8, 136.7, 134.6, 134.5, 132.0, 131.9, 123.0, 129.8, 129.8, 129.5, 129.4, 128.4, 128.3, 123.6, 121.1, 121.1, 120.8, 119.6, 119.1, 114.4, 114.3, 111.0, 110.9, 75.2, 47.2, 47.2, 40.9, 34.3, 31.5, 26.5, 26.4, 23.6, 23.6, 22.0, 20.8, 16.5, 16.4, 9.3, 9.2; HR-MS [ESI-MS(+)] calcd for  $[\text{M} + \text{H}]^+$ :  $\text{C}_{34}\text{H}_{37}\text{N}_2\text{O}_3$ : 521.2799, found: 521.2791; IR (KBr): 2923, 2862, 1712, 1694, 1588, 1471, 1456, 1438, 1364, 1274, 1109, 1081, 1016, 959, 773, 738  $\text{cm}^{-1}$ .

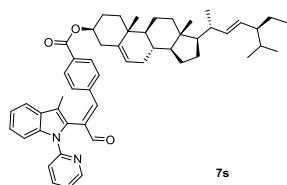

**(3S,8S,9S,10R,13R,14S,17R)-17-((2R,5S,E)-5-Ethyl-6-methylhept-3-en-2-yl)-10,13-dimethyl-2,3,4,7,8,9,10,11,12,13,14,15,16,17-tetradecahydro-1H-cyclopenta[a]phenanthren-3-yl 4-((E)-2-(3-methyl-1-(pyridin-2-yl)-1H-indol-2-yl)-3-oxoprop-1-en-1-yl)benzoate (7s):**

The title compound was prepared from propargyl alcohol **6s** (0.20 mmol, 155.0 mg) and was purified by column chromatography (5: 1 = petroleum ether: ethyl acetate) to give a yellow solid; m.p. 87.7 – 92.0  $^{\circ}\text{C}$ ; 100.1 mg, 64% yield;  $^1\text{H}$  NMR (400 MHz,  $\text{CDCl}_3$ )  $\delta$  9.70 (s, 1H), 8.43 (dd,  $J$  = 4.8, 1.2 Hz, 1H), 7.92 (d,  $J$  = 8.4 Hz, 2H), 7.75 – 7.71 (m, 1H), 7.69 – 7.63 (m, 2H), 7.59 (s, 1H), 7.39 (d,  $J$  = 8.4 Hz, 2H), 7.37 – 7.24 (m, 3H), 7.15 – 7.12 (m, 1H), 5.44 (d,  $J$  = 4.0 Hz, 1H), 5.24 – 5.18 (m, 1H), 5.10 – 5.05 (m, 1H), 4.90 – 4.81 (m, 1H), 2.46 (d,  $J$  = 7.4 Hz, 2H), 2.15 – 1.89 (m, 9H), 1.79 – 1.71 (m, 2H), 1.65 – 1.47 (m, 8H), 1.34 – 1.18 (m, 6H), 1.08 (d,  $J$  = 5.5 Hz, 7H), 0.90 (d,  $J$  = 6.2 Hz, 3H), 0.86 (t,  $J$  = 7.2 Hz, 6H), 0.75 (s, 3H);  $^{13}\text{C}$  NMR (101 MHz,  $\text{CDCl}_3$ )  $\delta$  192.3, 165.2, 151.2, 149.0, 148.0, 139.5, 138.5, 138.4, 137.9, 136.8, 134.6, 131.9, 129.9, 129.8, 129.5, 129.3, 128.3, 123.6, 122.9, 121.1, 120.8, 119.6, 119.1, 114.4, 111.0, 74.9, 56.8, 56.0, 51.3, 50.1, 42.3, 40.5, 39.7, 38.2, 37.0, 36.7, 32.0, 31.9, 29.0, 27.9, 25.5, 24.4, 21.3, 21.2, 21.1, 19.4, 19.1, 12.3, 12.1, 9.3; HR-MS [ESI-MS(+)] calcd for  $[\text{M} + \text{H}]^+$ :  $\text{C}_{53}\text{H}_{65}\text{N}_2\text{O}_3$ : 777.4990, found: 777.4979; IR (KBr): 2954, 2867, 1716, 1694, 1588, 1470, 1457, 1438, 1365, 1272, 1226, 1110, 973, 775, 738  $\text{cm}^{-1}$ .



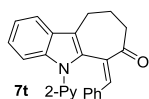

**(E)-6-Benzylidene-5-(pyridin-2-yl)-6,8,9,10-tetrahydrocyclohepta[b]indol-7(5H)-one (7t):**

The title compound was prepared from propargyl alcohol **6t** (0.20 mmol, 72.8 mg) and was purified by column chromatography (10: 1 = petroleum ether: ethyl acetate) to give a light yellow solid; m.p. 187.1 – 192.9 °C; 29.1 mg, 40% yield; <sup>1</sup>H NMR (400 MHz, CDCl<sub>3</sub>) δ 8.23 (dd, *J* = 4.9, 1.2 Hz, 1H), 7.71 – 7.65 (m, 1H), 7.55 – 7.50 (m, 1H), 7.47 – 7.42 (m, 1H), 7.32 (s, 1H), 7.27 – 7.23 (m, 2H), 7.14 (t, *J* = 7.4 Hz, 1H), 7.02 (t, *J* = 7.7 Hz, 2H), 6.97 – 6.92 (m, 1H), 6.75 – 6.69 (m, 3H), 3.32 – 3.16 (m, 2H), 3.08 – 2.97 (m, 1H), 2.86 – 2.75 (m, 1H), 2.41 – 2.25 (m, 2H); <sup>13</sup>C NMR (101 MHz, CDCl<sub>3</sub>) δ 203.4, 150.3, 148.4, 137.7, 137.6, 136.8, 134.7, 131.1, 129.7, 129.4, 128.7, 128.7, 127.9, 123.9, 121.0, 120.6, 120.4, 118.7, 117.4, 111.4, 40.6, 23.8, 22.0; HR-MS [ESI-MS(+)] calcd for [M + H]<sup>+</sup>: C<sub>25</sub>H<sub>21</sub>N<sub>2</sub>O: 365.1648, found: 365.1660; IR (KBr): 3045, 2927, 1688, 1587, 1468, 1438, 1372, 1246, 1127, 930, 745, 694 cm<sup>-1</sup>.

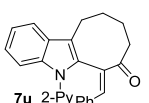

**(E)-6-Benzylidene-5-(pyridin-2-yl)-5,6,8,9,10,11-hexahydro-7H-cycloocta[b]indol-7-one (7u):**

The title compound was prepared from propargyl alcohol **6u** (0.20 mmol, 75.6 mg) and was purified by column chromatography (10: 1 = petroleum ether: ethyl acetate) to give a yellow solid; m.p. 180.0 – 183.4 °C; 25.7 mg, 34% yield; <sup>1</sup>H NMR (400 MHz, CDCl<sub>3</sub>) δ 8.28 (dd, *J* = 4.8, 1.3 Hz, 1H), 7.74 – 7.68 (m, 1H), 7.61 (s, 1H), 7.50 – 7.41 (m, 2H), 7.30 – 7.24 (m, 2H), 7.16 (t, *J* = 7.4 Hz, 1H), 7.07 – 6.97 (m, 3H), 6.78 (d, *J* = 7.6 Hz, 2H), 6.71 (d, *J* = 8.0 Hz, 1H), 3.30 – 3.17 (m, 2H), 2.86 – 2.80 (m, 1H), 2.58 – 2.46 (m, 1H), 2.29 – 2.09 (m, 2H), 2.03 – 1.90 (m, 1H), 1.81 – 1.73 (m, 1H); <sup>13</sup>C NMR (101 MHz, CDCl<sub>3</sub>) δ 203.5, 150.4, 148.7, 139.9, 137.0, 136.9, 134.7, 131.3, 130.2, 129.9, 129.3, 128.4, 128.1, 123.4, 120.8, 120.7, 120.2, 118.8, 118.1, 111.0, 39.0, 28.8, 26.1, 24.2; HR-MS [ESI-MS(+)] calcd for [M + H]<sup>+</sup>: C<sub>26</sub>H<sub>23</sub>N<sub>2</sub>O: 379.1805, found: 379.1793; IR (KBr): 3055, 2925, 2858, 1681, 1588, 1470, 1438, 1369, 1317, 1223, 1162, 1093, 1016, 748, 693 cm<sup>-1</sup>.

## 1.6. Post-synthetic applications of the **3a**, **3q** and **7a**

### 1) Removal of the pyrimidyl group of **3q** [7, 8]

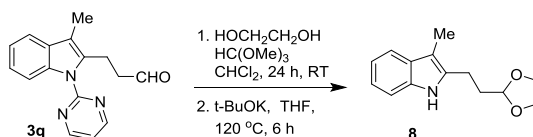

A suspension of **3q** (79.5 mg, 0.3 mmol), ethylene glycol (186.0 mg, 3 mmol), *p*-TsOH (10.3 mg, 20 mol %) and HC(OMe)<sub>3</sub> (127.2 mg, 1.2 mmol) in CH<sub>2</sub>Cl<sub>2</sub> for 24 h at room temperature, the solvent was removed *in vacuo*. the crude product was used for the next step without purification. To an oven-dried sealed tube charged with crude product and *t*-BuOK (202 mg, 1.8 mmol) followed by addition of anhydrous THF (3 mL) through syringe. After stirring at 120 °C for 6 h, saturated NH<sub>4</sub>Cl (5 mL) was added and resulting mixture was extracted with EtOAc (3 × 5 mL), and the combined organic layers were dried over Na<sub>2</sub>SO<sub>4</sub>, the solvent was removed *in vacuo* and the resultant residue was purified by flash chromatography on silica gel using ethyl acetate/petroleum ether = 1: 5 as eluent to afford the desired product **8**.

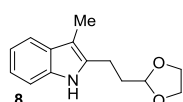

**2-(2-(1,3-Dioxolan-2-yl)ethyl)-3-methyl-1H-indole (8):** pale yellow oil, 52.0

mg, 75% yield; <sup>1</sup>H NMR (400 MHz, CDCl<sub>3</sub>) δ 8.18 (s, 1H), 7.53 (d, *J* = 7.5 Hz, 1H), 7.31 (d, *J* = 7.4 Hz, 1H), 7.19 – 7.11 (m, 2H), 4.97 (t, *J* = 4.4 Hz, 1H), 4.10 – 4.06 (m, 2H), 3.96 – 3.93 (m, 2H), 2.92 (t, *J* = 7.4 Hz, 2H), 2.30 (s, 3H), 2.09 – 2.05 (m, 2H); <sup>13</sup>C NMR (101 MHz, CDCl<sub>3</sub>) δ 135.3, 134.3, 129.3, 121.0, 118.9, 118.1, 110.3, 106.9, 103.7,

65.1, 33.2, 20.1, 8.4; HR-MS (ESI) calcd for  $[M + H]^+$ :  $C_{14}H_{18}NO_2$  : 232.1332, found: 232.1330; IR (KBr): 3398, 3050, 2926, 2885, 1580, 1463, 1407, 1333, 1240, 1141, 1026, 943, 892, 743  $cm^{-1}$ .

## 2) Alkynylation of aldehyde **3a** with $\alpha$ -diazo-phosphonate<sup>[9]</sup>

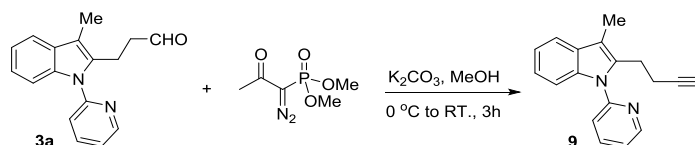

To a solution of aldehyde **3a** (0.079 g, 0.3 mmol) in anhydrous MeOH (1 mL) was added a solution of Ohira-Bestmann Reagent (0.144 g, 0.75 mmol) in MeOH (1 mL) and  $K_2CO_3$  (0.124 g, 0.9 mmol) at 0 °C. The resulting mixture was stirred at room temperature for 3 h before quenched with an aqueous solution of  $NH_4Cl$ . The aqueous phase was extracted with ethyl acetate, and the combined organic layers were washed with brine, dried over anhydrous  $Na_2SO_4$ , filtered, and concentrated in vacuo to give an oil. Purification by column chromatography (petroleum ether /ethyl acetate = 10: 1) afforded alkyne **9**.

**2-(But-3-yn-1-yl)-3-methyl-1-(pyridin-2-yl)-1H-indole (9)**: colorless oil, 55.0 mg, 71% yield ;  $^1H$  NMR (400 MHz,  $CDCl_3$ )  $\delta$  8.71 – 8.66 (m, 1H), 7.93 – 7.88 (m, 1H), 7.63 – 7.61 (m, 1H), 7.51 (d,  $J$  = 8.0 Hz, 1H), 7.40 – 7.36 (m, 1H), 7.35 – 7.31 (m, 1H), 7.24 – 7.19 (m, 2H), 3.22 (t,  $J$  = 7.7 Hz, 2H), 2.46 – 2.42 (m, 5H), 1.96 - 194 (m, 1H);  $^{13}C$  NMR (101 MHz,  $CDCl_3$ )  $\delta$  151.6, 149.7, 138.3, 136.5, 135.1, 129.4, 122.2, 121.8, 120.8, 120.4, 118.6, 111.1, 109.9, 83.8, 68.8, 24.6, 19.1, 8.9; HR-MS (ESI) calcd for  $[M + H]^+$ :  $C_{18}H_{17}N_2$ : 261.1386, found: 261.1394; IR (KBr): 3292, 3052, 2921, 2120, 1585, 1472, 1458, 1437, 1363, 1316, 1224, 1181, 1148, 780, 742, 639  $cm^{-1}$ .

## 3) Cyanation of aldehyde **7a** with acetonitrile<sup>[10]</sup>

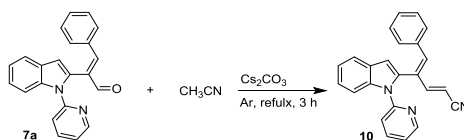

An oven-dried sealed tube charged **7a** (64.8 mg, 0.2 mmol),  $Cs_2CO_3$  (195.0 mg, 0.6 mmol) and  $CH_3CN$  (2.0 mL) under Ar atmosphere. The reaction mixture was then allowed to reflux for 3 h. After the reaction mixture was cooled down, the corresponding reaction mixture was removed in vacuo and the resultant residue was purified by flash chromatography on silica gel using ethyl acetate/petroleum (1: 20) as eluent to afford the desired products **10**.

**(2E,4Z)-5-Phenyl-4-(1-(pyridin-2-yl)-1H-indol-2-yl)penta-2,4-dienenitrile (10)**: brown solid, m.p. 144.2 – 146.8 °C; 25.7 mg, 37% yield ;  $^1H$  NMR (500 MHz,  $CDCl_3$ )  $\delta$  8.40 (dd,  $J$  = 4.8, 1.3 Hz, 1H), 7.70 – 7.68(m, 1H), 7.61 – 7.55 (m, 2H), 7.32 (d,  $J$  = 16.0 Hz, 1H), 7.28 – 7.22 (m, 3H), 7.16 (d,  $J$  = 7.3 Hz, 1H), 7.12 – 7.07 (m, 3H), 6.91 (d,  $J$  = 8.0 Hz, 1H), 6.88 (d,  $J$  = 7.5 Hz, 2H), 6.85 (s, 1H), 6.67 (s, 1H), 5.41 (d,  $J$  = 16.0 Hz, 1H);  $^{13}C$  NMR (126 MHz,  $CDCl_3$ )  $\delta$  153.6, 150.3, 149.0, 141.8, 137.7, 137.0, 134.6, 131.8, 129.1, 129.3, 128.4, 128.4, 123.5, 121.6, 121.5, 121.1, 119.7, 118.6, 111.7, 106.7, 98.5; HR-MS (ESI) calcd for  $[M + H]^+$ :  $C_{24}H_{18}N_3$  : 348.1495, found: 348.1502; IR (KBr): 3055, 2923, 2212, 1586, 1468, 1444, 1395, 1314, 965, 780, 744  $cm^{-1}$ .

## 4) Arylvinylation of aldehyde **7a** with diethyl benzylphosphonate<sup>[11]</sup>

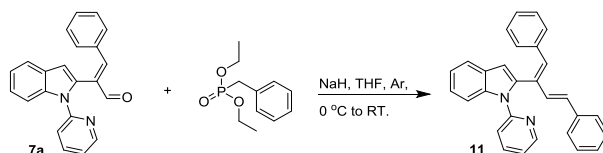

A 50 mL round bottom flask equipped with a magnetic stir bar was charged with diethyl benzylphosphonate (1.1 equiv) and dry THF (0.3 M). The solution was cooled to 0 °C with an ice bath followed by NaH addition (1.2 equiv). After stirring for 30 min at 0 °C the aldehyde **7a** (0.28 mmol) was slowly added. The reaction was allowed to warm to room temperature and stirred until judged complete by TLC analysis (12 h). The reaction mixture was then cooled to 0 °C and quenched with aqueous ammonium chloride. The solution was extracted with ethyl acetate. The combined organic phases were washed with brine, dried over Na<sub>2</sub>SO<sub>4</sub> and concentrated under reduced pressure. The crude product was purified by flash chromatography on silica gel using ethyl acetate/petroleum (1: 20) as eluent to afford the desired products **11**.

**2-((1Z,3E)-1,4-Diphenylbuta-1,3-dien-2-yl)-1-(pyridin-2-yl)-1H-indole (11):** brown solid, m.p. 171.3 – 174.4 °C; 59.0 mg, 67% yield; <sup>1</sup>H NMR (400 MHz, CDCl<sub>3</sub>) δ 8.44 – 8.38 (m, 1H), 7.86 – 7.82 (m, 1H), 7.77 (d, *J* = 6.8 Hz, 1H), 7.61 – 7.57 (m, 1H), 7.44 – 7.41 (m, 2H), 7.36 – 7.32 (m, 4H), 7.29 – 7.26 (m, 1H), 7.20 – 7.07 (m, 6H), 6.94 – 6.90 (m, 2H), 6.81 (s, 1H), 6.78 (d, *J* = 0.7 Hz, 1H), 6.65 (d, *J* = 15.9 Hz, 1H); <sup>13</sup>C NMR (101 MHz, CDCl<sub>3</sub>) δ 151.1, 148.6, 137.4, 137.3, 137.0, 136.2, 135.2, 134.6, 132.8, 132.0, 131.8, 129.0, 128.8, 128.6, 128.2, 127.7, 127.6, 126.7, 122.9, 121.2, 121.1, 120.8, 119.8, 112.4, 106.4; HR-MS (ESI) calcd for [M + H]<sup>+</sup>: C<sub>29</sub>H<sub>23</sub>N<sub>2</sub>: 399.1856, found: 399.1857; IR (KBr): 3054, 2956, 1585, 1467, 1452, 1443, 1436, 1390, 1343, 1312, 1208, 1150, 1017, 962, 743, 692 cm<sup>-1</sup>.

##### 5) Reduction of carbon-carbon double bonds and carbonyl group from **7a** <sup>[10]</sup>

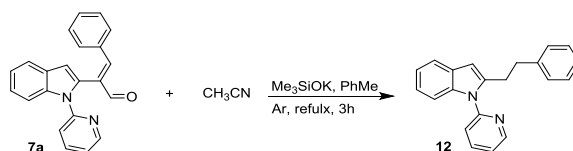

An oven-dried sealed tube charged **7a** (105.0 mg, 0.32 mmol), CH<sub>3</sub>CN (65.6 mg, 1.6 mmol), Me<sub>3</sub>SiOK (122.9 mg, 0.96 mmol) and PhMe (1.0 mL) under Ar atmosphere. The reaction mixture was then allowed to reflux for 3 h. After the reaction mixture was cooled down, the corresponding reaction mixture was removed in vacuo and the resultant residue was purified by flash chromatography on silica gel using ethyl acetate/petroleum (1: 20) as eluent to afford the desired products **12**.

**2-Phenethyl-1-(pyridin-2-yl)-1H-indole (12)** <sup>[12]</sup>: yellow oil, 39.1 mg, 44% yield; <sup>1</sup>H NMR (400 MHz, CDCl<sub>3</sub>) δ 8.72 – 8.68 (m, 1H), 7.92 – 7.88 (m, 1H), 7.65 – 7.59 (m, 1H), 7.44 (d, *J* = 8.0 Hz, 1H), 7.39 – 7.33 (m, 2H), 7.30 – 7.26 (m, 2H), 7.23 – 7.13 (m, 5H), 6.53 (s, 1H), 3.23 – 3.16 (m, 2H), 2.99 – 2.91 (m, 2H); <sup>13</sup>C NMR (101 MHz, CDCl<sub>3</sub>) δ 151.5, 149.7, 141.5, 140.8, 138.3, 137.3, 128.6, 128.4, 126.0, 122.1, 121.8, 121.1, 120.7, 120.1, 110.1, 102.5, 35.3, 29.7; HR-MS (ESI) calcd for [M + H]<sup>+</sup>: C<sub>21</sub>H<sub>19</sub>N<sub>2</sub>: 299.1543, found: 299.1550;

##### 6) Regioselective Reduction of α, β-unsaturated aldehyde **7a** by NaBH<sub>4</sub> <sup>[13]</sup>

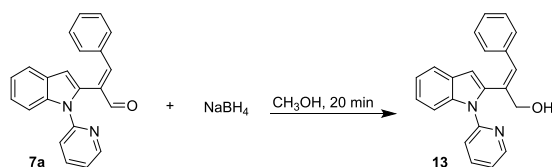

A 50 mL round bottom flask equipped with a magnetic stir bar was charged with **7a** (64.8 mg, 0.2 mmol) and CH<sub>3</sub>OH (2 mL). The solution was cooled to 0 °C with an ice bath followed by NaBH<sub>4</sub> addition (15.0 mg, 2.0 equiv). After stirring for 3 h, the reaction mixture was quenched with water and extracted with ethyl acetate. The combined organic phases were dried over Na<sub>2</sub>SO<sub>4</sub> and concentrated under reduced pressure. The crude product was purified by flash chromatography on silica gel using ethyl acetate/petroleum (1: 6) as eluent to afford the desired products **13**.

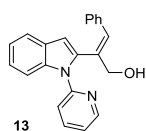

**(E)-3-Phenyl-2-(1-(pyridin-2-yl)-1H-indol-2-yl)prop-2-en-1-ol (13)**: white solid, m.p. 110.9 – 115.5 °C; 59.0 mg, 82% yield; <sup>1</sup>H NMR (400 MHz, CDCl<sub>3</sub>) δ 8.42 (dd, *J* = 4.9, 1.2 Hz, 1H), 7.75 – 7.73 (m, 1H), 7.57 – 7.53 (m, 1H), 7.44 – 7.37 (m, 1H), 7.27 – 7.20 (m, 2H), 7.15 – 7.10 (m, 1H), 7.07 (t, *J* = 7.3 Hz, 1H), 6.99 (t, *J* = 7.4 Hz, 2H), 6.93 (d, *J* = 8.0 Hz, 1H), 6.82 (s, 1H), 6.67 (d, *J* = 7.4 Hz, 2H), 6.61 (s, 1H), 5.23 (s, 1H), 4.64 (s, 2H); <sup>13</sup>C NMR (101 MHz, CDCl<sub>3</sub>) δ 149.9, 148.1, 137.9, 136.9, 136.4, 135.7, 132.3, 131.6, 129.3, 128.3, 127.9, 127.3, 122.7, 121.4, 121.3, 121.2, 120.2, 110.2, 104.5, 70.3; HR-MS (ESI) calcd for [M + H]<sup>+</sup>: C<sub>22</sub>H<sub>19</sub>N<sub>2</sub>O : 327.1494, found: 327.1492; IR (KBr): 3748, 3055, 2920, 2854, 1589, 1470, 1452, 1438, 1386, 1345, 1313, 1211, 1151, 1028, 779, 743, 695 cm<sup>-1</sup>.

#### 7) Coupling-cyclization of **7a** with phenylhydrazine<sup>[14]</sup>

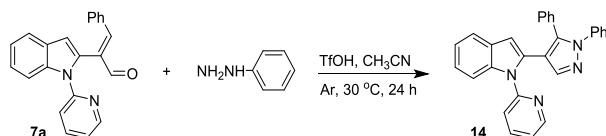

Into the reaction mixture of **7a** (64.8 mg, 0.2 mmol) and acetonitrile (1 mL) were added phenylhydrazine (21.6 mg, 0.2 mmol). The reaction mixture then was stirred for 10 min. at 30 °C followed by TfOH (30.0 g, 0.4 mmol) were added. The mixture was stirred at the same temperature till completion of the reaction which was monitored by TLC (24 h). After completion of the reaction, the crude was quenched by sat. solution of sodiumbicarbonate and extracted with ethylacetate. The organic layer was separated and dried with anhydrous Na<sub>2</sub>SO<sub>4</sub> and then concentrated under reduced pressure to get crude compound. The crude product was purified by flash chromatography on silica gel using ethyl acetate/petroleum (1: 10) as eluent to afford the desired products **14**.

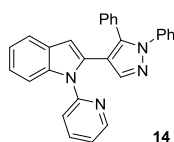

**2-(1,5-Diphenyl-1H-pyrazol-4-yl)-1-(pyridin-2-yl)-1H-indole (14)**: brown solid; m.p. 63.7 – 68.6 °C; 37.0 mg, 42% yield; <sup>1</sup>H NMR (400 MHz, CDCl<sub>3</sub>) δ 8.38 (dd, *J* = 4.6, 1.4 Hz, 1H), 7.71 (s, 1H), 7.64 – 7.62 (m, 1H), 7.58 – 7.54 (m, 1H), 7.52 – 7.50 (m, 1H), 7.30 – 7.26 (m, 3H), 7.24 – 7.16 (m, 5H), 7.14 – 7.07 (m, 3H), 6.90 (d, *J* = 8.0 Hz, 1H), 6.83 (d, *J* = 7.4 Hz, 2H), 6.64 (s, 1H); <sup>13</sup>C NMR (101 MHz, CDCl<sub>3</sub>) δ 151.7, 151.3, 148.9, 141.1, 140.5, 139.7, 137.5, 131.2, 129.7, 129.4, 128.7, 128.7, 128.3, 128.2, 127.4, 122.6, 121.2, 121.1, 121.0, 120.3, 114.3, 111.2, 105.8; HR-MS (ESI) calcd for [M + H]<sup>+</sup>: C<sub>28</sub>H<sub>21</sub>N<sub>4</sub> : 413.1761, found: 413.1772; IR (KBr): 3055, 2921, 2856, 1588, 1499, 1468, 1454, 1435, 1379, 1315, 1208, 1152, 1069, 1023, 962, 772, 697 cm<sup>-1</sup>.

### 1.7. Control experiments for the mechanism studies

#### 1) H/D exchange experiment of α-(2-indolyl)alcohol **1a**

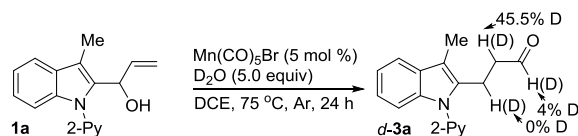

An oven-dried sealed tube charged allyl alcohol **1a** (26.4 mg, 0.10 mmol),  $\text{Mn(CO)}_5\text{Br}$  (2.0 mg, 5 mol %),  $\text{D}_2\text{O}$  (10.0 mg, 0.50 mmol) and DCE (1.0 mL) under Ar atmosphere. The reaction mixture was then allowed to stir at 75 °C for 24 h. After the reaction mixture was cooled down, the corresponding reaction mixture was purified by flash chromatography on silica gel using ethyl acetate/petroleum ether (1: 10) as eluent to afford the desired products **d-3a** in which 45.5 D% was incorporated into the  $\alpha$ -position of aldehyde **d-3a** (see **Supplementary Fig. 1**).

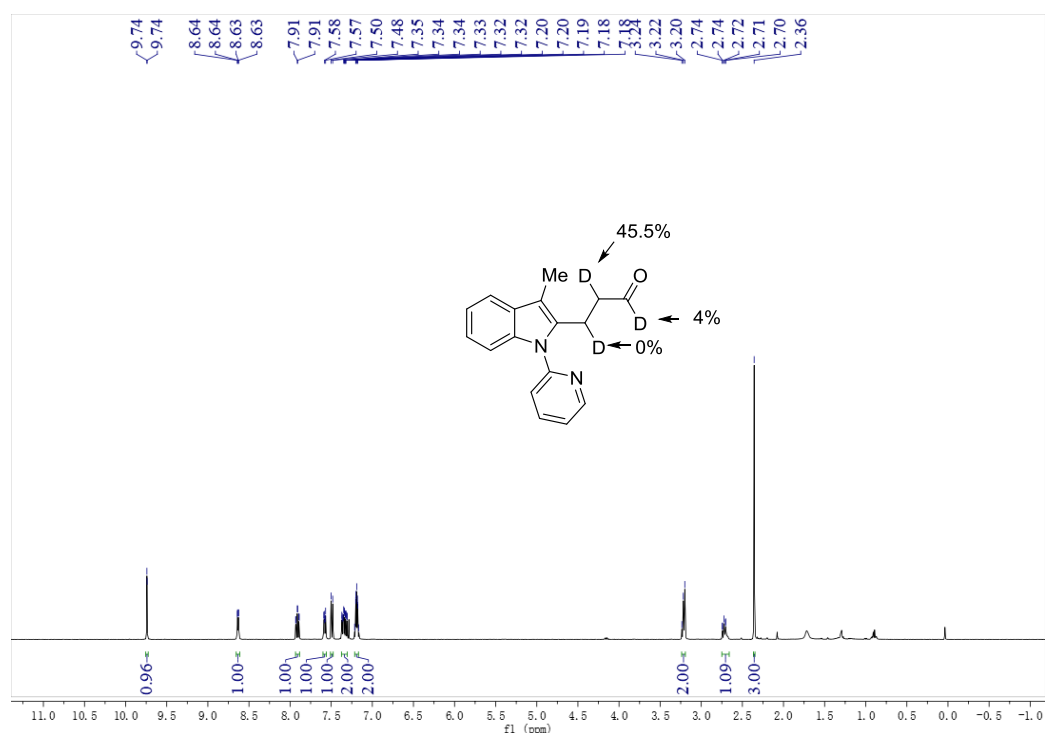

**Supplementary Fig. 1** | The <sup>1</sup>H NMR spectra of **d-3a**.

## 2) H/D exchange experiment of aldehyde **3a**

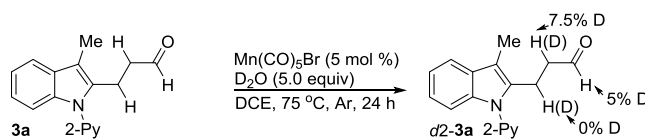

An oven-dried sealed tube charged **3a** (26.4 mg, 0.10 mmol),  $\text{Mn(CO)}_5\text{Br}$  (2.0 mg, 5 mol %),  $\text{D}_2\text{O}$  (10.0 mg, 0.50 mmol) and DCE (1.0 mL) under Ar atmosphere. The reaction mixture was then allowed to stir at 75 °C for 24 h. After the reaction mixture was cooled down, the corresponding reaction mixture was purified by flash chromatography on silica gel using ethyl acetate/petroleum ether (1: 10) as eluent to afford the desired products **d2-3a** in which 7.5 D% was incorporated into the  $\alpha$ -position of aldehyde **d2-3a** (see **Supplementary Fig. 2**).

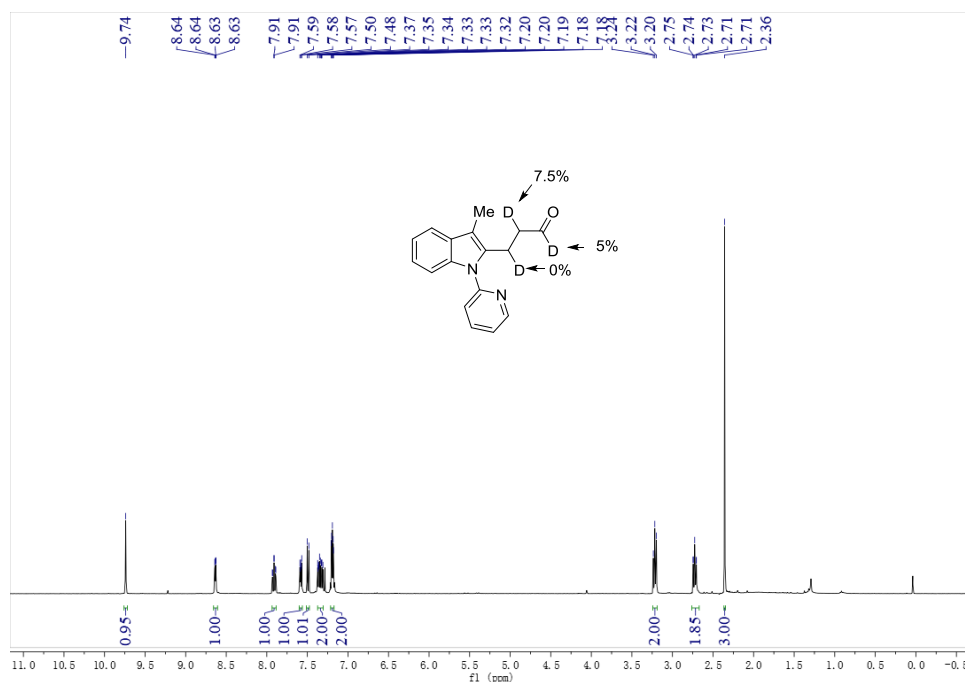

### 3) Intramolecular cyclization of $\alpha$ -[2-(*N*-phenyl) indolyl]allylic alcohol **1u**

An oven-dried sealed tube charged allylic alcohol **1u** (49.8 mg, 0.20 mmol),  $\text{Mn}(\text{CO})_5\text{Br}$  (0.01 mmol, 5 mol %), and DCE (2.0 mL) under Ar atmosphere. The reaction mixture was then allowed to stir at 75 °C for 24 h. The intramolecular cyclization product **3u'** instead of in-situ group-inversion rearrangement product **3u** was obtained. **3u'** was purified by flash chromatography on silica gel using ethyl acetate/petroleum ether (1: 50) as eluent to afford the **3u'**.

#### 4) Csp<sup>2</sup>-Csp<sup>3</sup> $\sigma$ bond activation-based carbonylethylation of $\alpha$ -(2-indolyl)allyl alcohol 1a

An oven-dried sealed tube charged allylic alcohol **1a** (52.8 mg, 0.20 mmol),  $\text{Mn}(\text{CO})_5\text{Br}$  (0.01 mmol, 5 mol %), and DCE (2.0 mL) under Ar atmosphere. The reaction mixture was then allowed to stir at 45 °C for 24 h. After the reaction mixture was cooled down, the corresponding reaction mixture was purified by flash chromatography on silica gel using ethyl acetate/petroleum

ether (1: 10) as eluent to afford the desired products **3a** (39.6 mg, 75% yield).

### 5) Csp<sup>2</sup>-H bond activation-based carbonylethylation of 2-unsubstituted indole **7**

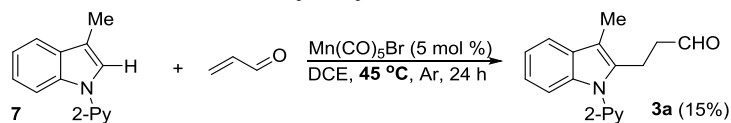

An oven-dried sealed tube charged 2-unsubstituted indole **7** (41.6 mg, 0.20 mmol), acrylaldehyde (11.2 mg, 0.20 mmol), Mn(CO)<sub>5</sub>Br (0.01 mmol, 5 mol %) and DCE (2.0 mL) under Ar atmosphere. The reaction mixture was then allowed to stir at 45 °C for 24 h. After the reaction mixture was cooled down, the corresponding reaction mixture was purified by flash chromatography on silica gel using ethyl acetate/petroleum ether (1: 10) as eluent to afford the desired products **3a** (7.9 mg, 15% yield).

### 6) Mn(I)-catalyzed cross-coupling reaction between different α-(2-indolyl)allyl alcohols **1g** and **4a**

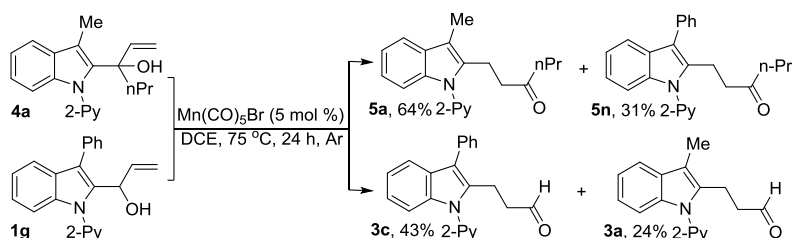

An oven-dried sealed tube charged allyl alcohol **4a** (30.6 mg, 0.10 mmol), **1g** (32.6 mg, 0.10 mmol), Mn(CO)<sub>5</sub>Br (3.0 mg, 0.01 mmol) and DCE (2.0 mL) under Ar atmosphere. The reaction mixture was then allowed to stir at 75 °C for 24 h. After the reaction mixture was cooled down, the corresponding reaction mixture was purified by flash chromatography on silica gel using ethyl acetate/petroleum ether (1: 10) as eluent to afford the products **5a** (19.5 mg, 64% yield); **5n** (11.5 mg, 31% yield); **3c** (14.1 mg, 43% yield); **3a** (6.3 mg, 24% yield).

## 1.8. Single crystal structure and data

### 1) The single crystal structure and data of **5m**

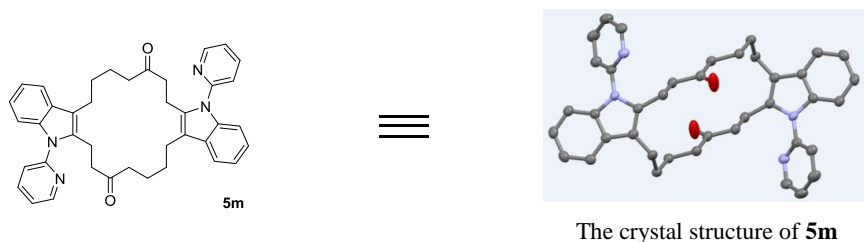

**Supplementary Fig. 3** | The single crystal structure of **5m** (the ellipsoid contour probability level is 30%).

**Supplementary Table 5** | Crystal data and structure refinement for **5m**

| Identification code | <b>5m</b>                                                     |
|---------------------|---------------------------------------------------------------|
| Empirical formula   | C <sub>40</sub> H <sub>40</sub> N <sub>4</sub> O <sub>2</sub> |
| Formula weight      | 608.76                                                        |
| Temperature/K       | 149.99(10) K                                                  |

|                                   |                                             |
|-----------------------------------|---------------------------------------------|
| Wavelength                        | 1.54178 Å                                   |
| Crystal system                    | Monoclinic                                  |
| Space group                       | C2/c                                        |
| a/Å                               | 21.8876(11)                                 |
| b/Å                               | 5.8545(3)                                   |
| c/Å                               | 27.6957(16)                                 |
| $\alpha/^\circ$                   | 90                                          |
| $\beta/^\circ$                    | 100.788(6)                                  |
| $\gamma/^\circ$                   | 90                                          |
| Volume/Å <sup>3</sup>             | 3486.2(3)                                   |
| Z, Calculated density             | 4, 1.160 Mg/m <sup>3</sup>                  |
| Absorption coefficient            | 0.565 mm <sup>-1</sup>                      |
| F (000)                           | 1296                                        |
| Crystal size/mm <sup>3</sup>      | 0.150 * 0.100 * 0.080                       |
| Theta range for data collection   | 3.249 to 73.761 deg                         |
| Limiting indices                  | -23<=h<=26, -7<=k<=4, -34<=l<=26            |
| Reflections collected / unique    | 5895 / 3386 [R(int) = 0.0398]               |
| Completeness to theta = 25.242    | 99.8 %                                      |
| Absorption correction             | Semi-empirical from equivalents             |
| Max. and min. transmission        | 1.00000 and 0.74784                         |
| Refinement method                 | Full-matrix least-squares on F <sup>2</sup> |
| Data / restraints / parameters    | 3386 / 0 / 208                              |
| Goodness-of-fit on F <sup>2</sup> | 1.071                                       |
| Final R indices [I>2sigma(I)]     | R1 = 0.0607, wR2 = 0.1713                   |
| R indices (all data)              | R1 = 0.0842, wR2 = 0.1955                   |
| Extinction coefficient            | n/a                                         |
| Largest diff. peak and hole       | 0.820 and -0.230 e.Å <sup>-3</sup>          |

2) The single crystal structure and data of **7f**

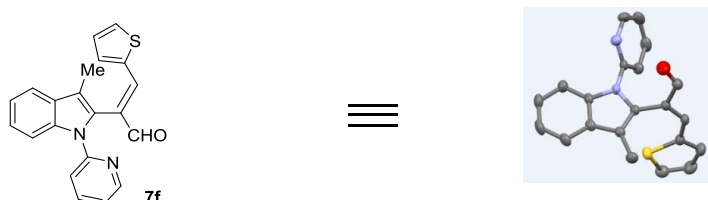

The crystal structure of **7f**

**Supplementary Fig. 4** | The single crystal structure of **7f** (the ellipsoid contour probability level is 30%)

**Supplementary Table 6 | Crystal data and structure refinement for 7f**

Identification code

**7f**



|                                   |                                                   |
|-----------------------------------|---------------------------------------------------|
| Empirical formula                 | C <sub>21</sub> H <sub>16</sub> N <sub>2</sub> OS |
| Formula weight                    | 344.42                                            |
| Temperature/K                     | 199.98(10) K                                      |
| Wavelength                        | 0.71073 Å                                         |
| Crystal system                    | monoclinic                                        |
| Space group                       | P2(1)/n                                           |
| a/Å                               | 9.9522(8)                                         |
| b/Å                               | 17.0333(13)                                       |
| c/Å                               | 10.1226(8)                                        |
| α/°                               | 90                                                |
| β/°                               | 96.085(7)                                         |
| γ/°                               | 90                                                |
| Volume/Å <sup>3</sup>             | 1706.3(2)                                         |
| Z, Calculated density             | 4, 1.341 Mg/m <sup>3</sup>                        |
| Absorption coefficient            | 0.200 mm <sup>-1</sup>                            |
| F (000)                           | 720.0                                             |
| Crystal size/mm <sup>3</sup>      | 0.140 * 0.130 * 0.120                             |
| Theta range for data collection   | 2.350 to 29.340 deg                               |
| Limiting indices                  | -13<=h<=8, -22<=k<=23, -13<=l<=12                 |
| Reflections collected / unique    | 9813 / 4052 [R(int) = 0.0253]                     |
| Completeness to theta = 25.242    | 100.0 %                                           |
| Absorption correction             | Semi-empirical from equivalents                   |
| Max. and min. transmission        | 1.00000 and 0.40333                               |
| Refinement method                 | Full-matrix least-squares on F <sup>2</sup>       |
| Data / restraints / parameters    | 4052 / 0 / 227                                    |
| Goodness-of-fit on F <sup>2</sup> | 0.996                                             |
| Final R indices [I>2sigma(I)]     | R1 = 0.0444, wR2 = 0.1334                         |
| R indices (all data)              | R1 = 0.0595, wR2 = 0.1490                         |
| Extinction coefficient            | n/a                                               |
| Largest diff. peak and hole       | 0.233 and -0.343 e.Å <sup>-3</sup>                |

### 3) The single crystal structure and data of **7t**

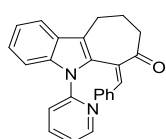

**7t**

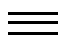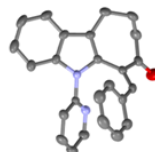

The crystal structure of **7t**

**Supplementary Fig. 5** | The single crystal structure of **7t** (the ellipsoid contour probability level is 30%).

**Supplementary Table 7 | Crystal data and structure refinement for 7t.**

|                                   |                                                  |
|-----------------------------------|--------------------------------------------------|
| Identification code               | 7t                                               |
| Empirical formula                 | C <sub>25</sub> H <sub>20</sub> N <sub>2</sub> O |
| Formula weight                    | 364.43                                           |
| Temperature/K                     | 200.01(10) K                                     |
| Wavelength                        | 0.71073 Å                                        |
| Crystal system                    | monoclinic                                       |
| Space group                       | P2(1)/n                                          |
| a/Å                               | 8.3992(6)                                        |
| b/Å                               | 20.9553(16)                                      |
| c/Å                               | 11.0063                                          |
| $\alpha$ /°                       | 90                                               |
| $\beta$ /°                        | 100.347(7)                                       |
| $\gamma$ /°                       | 90                                               |
| Volume/Å <sup>3</sup>             | 1905.7(2)                                        |
| Z, Calculated density             | 4, 1.270 Mg/m <sup>3</sup>                       |
| Absorption coefficient            | 0.078 mm <sup>-1</sup>                           |
| F (000)                           | 768                                              |
| Crystal size/mm <sup>3</sup>      | 0.140 * 0.130 * 0.120                            |
| Theta range for data collection   | 2.117 to 25.008 deg                              |
| Limiting indices                  | -8<= $h$ <=9, -24<= $k$ <=24, -13<= $l$ <=10     |
| Reflections collected / unique    | 8289 / 3339 [R(int) = 0.0245]                    |
| Completeness to theta = 25.242    | 100.0 %                                          |
| Absorption correction             | Semi-empirical from equivalents                  |
| Max. and min. transmission        | 1.00000 and 0.88392                              |
| Refinement method                 | Full-matrix least-squares on F <sup>2</sup>      |
| Data / restraints / parameters    | 3339 / 0 / 253                                   |
| Goodness-of-fit on F <sup>2</sup> | 0.991                                            |
| Final R indices [I>2sigma(I)]     | R1 = 0.0452, wR2 = 0.1295                        |
| R indices (all data)              | R1 = 0.0583, wR2 = 0.1432                        |
| Extinction coefficient            | n/a                                              |
| Largest diff. peak and hole       | 0.337 and -0.251 e.Å <sup>-3</sup>               |

### 1.9. Computational detail

All the calculations were accomplished using Gaussian 09D package<sup>[15]</sup>. The geometries were calculated by density functional theory (DFT). All the structures optimization and frequency calculation were performed by the M06-L/Def2-SVP level at 298.15 K and 1 atm<sup>[16-19]</sup>. The ultrafine integration grid was used in the structures optimization and frequency calculation. The intrinsic reaction coordinate (IRC)<sup>[20]</sup> was prepared at the same level as above. To further accurate energies, the single-point energy calculation with solvation effects was performed by M06-L

functional. A larger mixed basis set Def2-tzvp<sup>[19, 21]</sup> was used in single-point energy calculation. Solvation effects were performed in dichloroethane solvent with SMD method<sup>[22]</sup>. Because of the experiment condition at 348.15 K, the entropic contribution has been overrated in the solution. The correction of entropy was considered for all the species<sup>[23]</sup>. The orbital figures were performed by Multiwfn and VMD programs<sup>[24]</sup>.

The general reaction mechanism is firstly proposed in **Supplementary Fig. 6**. Meanwhile, the possible mechanism for the formation of **5l** and **5m** was also shown in **Supplementary Fig. 7**, in which the interaction between allylic alcohol **4l** or **4m** with Mn(CO)<sub>5</sub>Br produced cyclomanganated species **A-4**, followed by chelation-assisted β-aryl elimination to give six-coordination Mn-carbonyl complexes **B-4**. Subsequently, bimolecular migratory insertion of Mn-intermediate **B-4** and protonation of carbon-Mn bonds of complexes **B-5** afforded the macrocyclic products **5l** and **5m**.

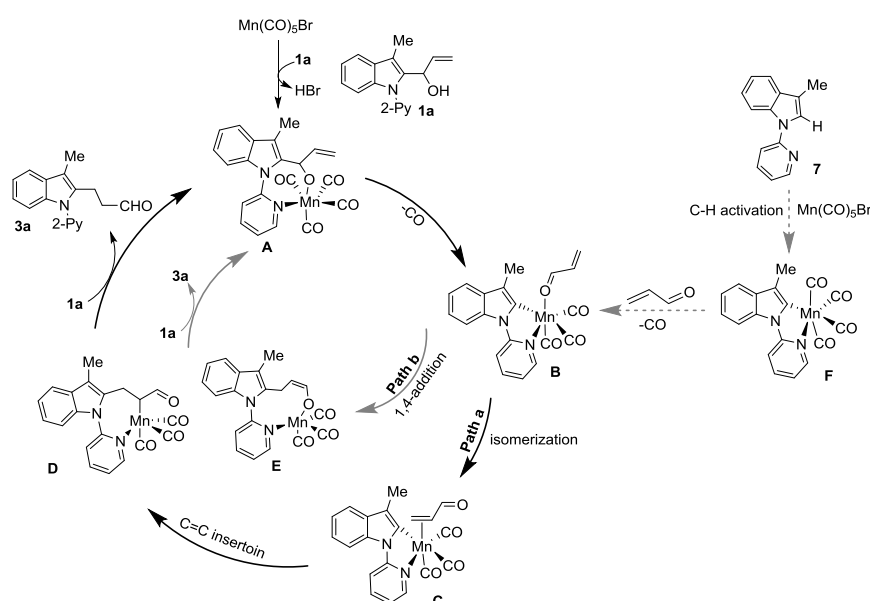

**Supplementary Fig. 6 | Proposed reaction mechanism. Path a** Mn(I)-catalyzed 1,3-STR via intramolecular ligand exchange and migratory insertion. **Path b** Mn(I)-catalyzed 1,3-STR via intramolecular Michael-addition.

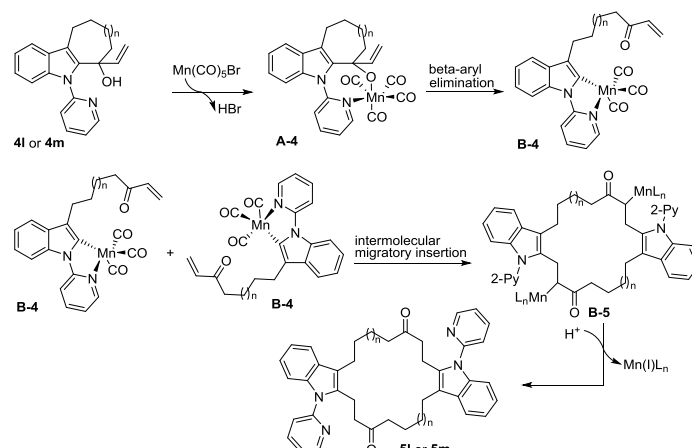

**Supplementary Fig. 7 | Proposed reaction mechanism for the formation of 5l and 5m.**

## 1) Discussion about the influence of different functions

The key intermediates and transition states were calculated using M06-L, M06, B3LYP(D3BJ), PBE0(D3BJ), and MN15 functional. All the structures optimization and frequency calculations were done with the ultrafine integration grid. All the result lead to the same conclusion that the Gibbs activation energies of the  $\beta$ -aryl elimination step via *cisoid-TS1* or *transoid-TS1* with are higher, to the same extent, than those of the 1,4-addition and the C=C insertion steps (see table below). For the  $\beta$ -aryl elimination step, the Gibbs activation energies with B3LYP(D3BJ), PBE0(D3BJ), and MN15 functional are slightly higher than that with M06-L, M06(D3) functional. While the Gibbs activation energies of the C=C insertion via the *cisoid-TS2* and *transoid-TS2* with B3LYP(D3BJ) functional are slightly higher than that with M06-L, M06(D3), PBE0(D3BJ), and MN15 functional. The Gibbs activation energy of the *cisoid-TS3* with B3LYP(D3BJ) functional is also lower than that of PBE0(D3BJ) and MN15 functional. The results suggest that Minnesota functional (M06-L, M06, and MN15) can well present the dispersion effect. The calculated results with M06-L, M06, and MN15 functional are consistent with the experimental results.

Overall, the DFT computational results with B3LYP(D3BJ) and PBE0(D3BJ) functional and Minnesota functional with ultrafine integration grid do not change the mechanism and the discussion.

**Supplementary Table 8** | The comparison of the Gibbs free energies of the key intermediates and transition states using different functions

|                     | M06-L | M06-L(D3) | B3LYP(D3BJ) | PBE0(D3BJ) | MN15 | M06(D3) | M06  |
|---------------------|-------|-----------|-------------|------------|------|---------|------|
| <i>cisoid-A</i>     | 0.0   | 0.0       | 0.0         | 0.0        | 0.0  | 0.0     | 0.0  |
| <i>transoid-A</i>   | 2.5   | 2.5       | 0.5         | 0.4        | 1.6  | 0.4     | 1.2  |
| <i>cisoid-TS1</i>   | 16.2  | 16.6      | 18.9        | 18.8       | 18.2 | 16.3    | 15.4 |
| <i>transoid-TS1</i> | 18.5  | 18.8      | 20.3        | 19.9       | 19.4 | 17.2    | 16.7 |
| <i>cisoid-B</i>     | 1.4   | 1.1       | 0.5         | 3.3        | 4.5  | 1.4     | 0.7  |
| <i>transoid-B</i>   | -1.2  | -0.4      | -1.9        | 1.1        | 3.8  | 0.0     | -2.0 |
| <i>cisoid-C</i>     | 4.8   | 5.2       | 6.9         | 5.1        | 4.6  | 2.1     | 1.3  |
| <i>transoid-C</i>   | 2.7   | 3.2       | 4.9         | 3.5        | 2.7  | 0.7     | 0.2  |
| <i>cisoid-TS2</i>   | 11.4  | 10.6      | 13.9        | 13.1       | 12.3 | 8.0     | 7.5  |
| <i>transoid-TS2</i> | 10.3  | 11.9      | 12.3        | 12.1       | 10.9 | 7.0     | 6.3  |
| <i>cisoid-TS3</i>   | 18.7  | 18.8      | 15.5        | 25.4       | 23.0 | 19.2    | 18.8 |

## 2) The full version of the computed potential energy surface

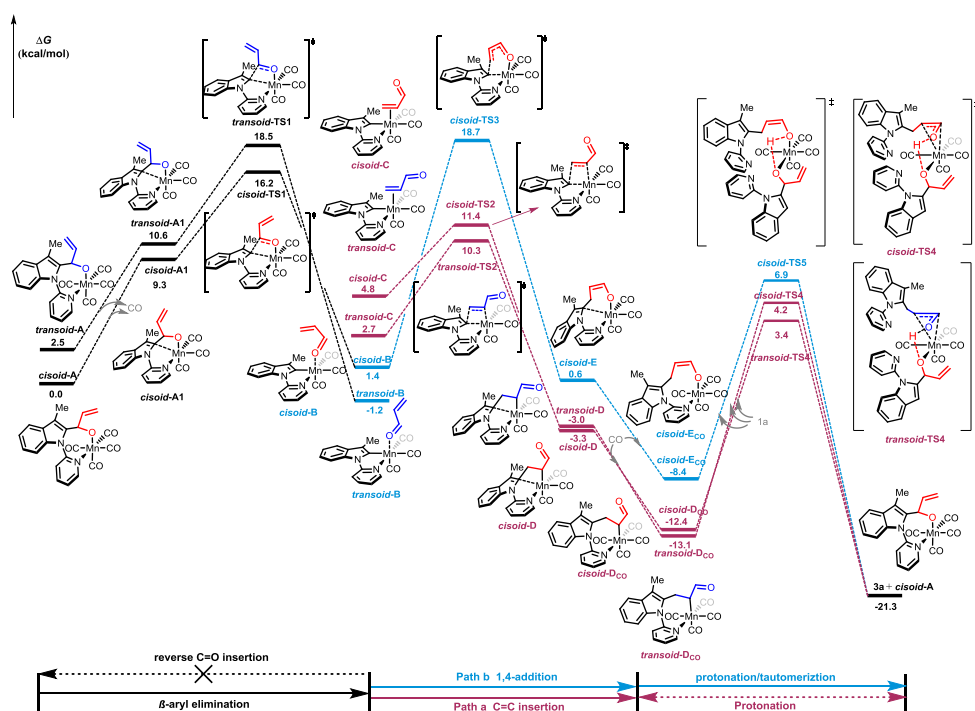

**Supplementary Fig. 8 | Computed potential energy surface for the Mn(I)-catalyzed carbon-skeleton rearrangement via C-C bond activation at the SMD(DCE)/M06L/Def2tzvp/M06L/def2svp level of theory. Energies are in kcal/mol. Purple line The DFT-computed energy surfaces of Path a. Blue line The DFT-computed energy surfaces of Path b.**

### 3) Discussion about the formation of the active species from the $\text{Mn}(\text{CO})_5\text{Br}$ and **1a**.

The generation of cyclomanganated complex **A** from the  $\text{Mn}(\text{CO})_5\text{Br}$  and **1a** has been investigated. The first step is the ligand-exchange of  $\text{Mn}(\text{CO})_5\text{Br}$  generating the six-coordination intermediates *cisoid-A*<sub>pre</sub> (-13.4 kcal/mol) or *transoid-A*<sub>pre</sub> (-12.1 kcal/mol), in which the pyridine coordinate with Mn center. Then, with the assistance of the bromide, the alcohol is deprotonated via transition states *cisoid-TS6* or *transoid-TS6*, respectively. The Gibbs free energy of activation of *cisoid-TS6* is 5.8 kcal/mol, which is lower than that of *transoid-TS6* by 2.5 kcal/mol. The formation of the active species has to overcome relatively high Gibbs free energy of activation.

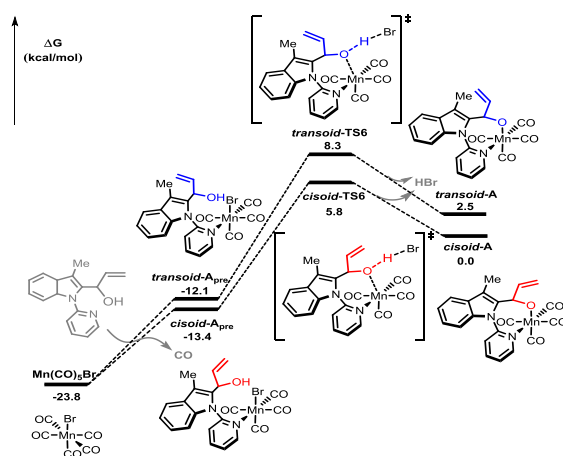

**Supplementary Fig. 9 | Computed potential energy surface for the reaction between  $\text{Mn}(\text{CO})_5\text{Br}$  and **1a** at the SMD(DCE)/M06L/Def2tzvp/M06L/def2svp level of theory.**

#### 4) Discussion about the formation of the active species from the Mn(CO)<sub>5</sub>Br and 1a.

**Supplementary Table 9** | Absolute energies of all optimized structures

| Species                | $E_c$    | $H_c$    | $G_c$     | $G_{c(T=348.15K)}$ | $E/(\text{Hartree})$ | $H/(\text{Hartree})$ | $G/(\text{Hartree})$ | Solvation<br>Energy/ $(\text{Hartree})$ | $G_{sol}/(\text{Hartree})$ |
|------------------------|----------|----------|-----------|--------------------|----------------------|----------------------|----------------------|-----------------------------------------|----------------------------|
| Mn(CO) <sub>5</sub> Br | 0.043528 | 0.058250 | 0.002114  | -0.007300          | -4290.830790         | -4290.816068         | -4290.872204         | -4292.005367                            | -4292.012668               |
| CO                     | 0.005078 | 0.008383 | -0.014052 | -0.017815          | -113.203742          | -113.200437          | -113.222872          | -113.338245                             | -113.356061                |
| HBr                    | 0.006080 | 0.009385 | -0.013143 | -0.016920          | -2574.346434         | -2574.343129         | -2574.365656         | -2574.668463                            | -2574.685383               |
| <b>1a</b>              | 0.292213 | 0.310442 | 0.247014  | 0.236377           | -841.146017          | -841.127788          | -841.191217          | -842.351544                             | -842.115167                |
| <b>3a</b>              | 0.292301 | 0.310416 | 0.246349  | 0.235606           | -841.178914          | -841.160799          | -841.224866          | -842.384847                             | -842.149241                |
| cisoid-A               | 0.315735 | 0.343906 | 0.257579  | 0.243101           | -2444.385984         | -2444.357813         | -2444.444140         | -2446.291606                            | -2446.048505               |
| transoid-A             | 0.316206 | 0.344215 | 0.258646  | 0.244296           | -2444.381845         | -2444.353836         | -2444.439405         | -2446.288885                            | -2446.044589               |
| cisoid-A1              | 0.308001 | 0.333271 | 0.254297  | 0.241053           | -2331.151046         | -2331.125776         | -2331.204750         | -2332.918748                            | -2332.677695               |
| transoid-A1            | 0.307914 | 0.333398 | 0.253404  | 0.239989           | -2331.146435         | -2331.120952         | -2331.200946         | -2332.915539                            | -2332.675550               |
| cisoid-TS1             | 0.305984 | 0.331287 | 0.251835  | 0.238511           | -2331.140625         | -2331.115323         | -2331.194775         | -2332.905070                            | -2332.666560               |
| transoid-TS1           | 0.306135 | 0.331263 | 0.252771  | 0.239608           | -2331.137416         | -2331.112288         | -2331.190780         | -2332.902583                            | -2332.662975               |
| cisoid-B               | 0.305878 | 0.332544 | 0.248502  | 0.234408           | -2331.158405         | -2331.131740         | -2331.215782         | -2332.924683                            | -2332.690275               |
| transoid-B             | 0.305981 | 0.332568 | 0.248758  | 0.234703           | -2331.161113         | -2331.134525         | -2331.218336         | -2332.929109                            | -2332.694406               |
| cisoid-C               | 0.306832 | 0.332647 | 0.252458  | 0.239010           | -2331.155721         | -2331.129905         | -2331.210095         | -2332.923822                            | -2332.684813               |
| transoid-C             | 0.306942 | 0.332716 | 0.251989  | 0.238452           | -2331.156934         | -2331.131161         | -2331.211887         | -2332.926525                            | -2332.688073               |
| cisoid-TS2             | 0.306945 | 0.331866 | 0.254124  | 0.241086           | -2331.148320         | -2331.123399         | -2331.201142         | -2332.915325                            | -2332.674239               |
| transoid-TS2           | 0.306890 | 0.331803 | 0.253791  | 0.240709           | -2331.147688         | -2331.122775         | -2331.200787         | -2332.916802                            | -2332.676093               |
| cisoid-TS3             | 0.306280 | 0.331271 | 0.253421  | 0.240366           | -2331.141054         | -2331.116063         | -2331.193912         | -2332.902979                            | -2332.662613               |
| cisoid-D               | 0.308885 | 0.333836 | 0.256265  | 0.243257           | -2331.174379         | -2331.149428         | -2331.226998         | -2332.941030                            | -2332.697774               |
| cisoid-D <sub>CO</sub> | 0.317912 | 0.345275 | 0.262128  | 0.248185           | -2444.410088         | -2444.382725         | -2444.465871         | -2446.316484                            | -2446.068299               |
| transoid-D             | 0.308211 | 0.333462 | 0.254535  | 0.241299           | -2331.167321         | -2331.142070         | -2331.220997         | -2332.938458                            | -2332.697159               |

| Species                           | $E_c$    | $H_c$    | $G_c$    | $G_{c(T=348.15K)}$ | $E/(\text{Hartree})$ | $H/(\text{Hartree})$ | $G/(\text{Hartree})$ | Solvation<br>Energy/(\text{Hartree}) | $G_{sol}/(\text{Hartree})$ |
|-----------------------------------|----------|----------|----------|--------------------|----------------------|----------------------|----------------------|--------------------------------------|----------------------------|
| transoid- <b>D</b> <sub>CO</sub>  | 0.317509 | 0.345033 | 0.261225 | 0.247171           | -2444.406354         | -2444.378831         | -2444.462638         | -2446.316614                         | -2446.069443               |
| cisoid- <b>E</b>                  | 0.308292 | 0.333594 | 0.254877 | 0.241676           | -2331.169358         | -2331.144055         | -2331.222772         | -2332.933135                         | -2332.691459               |
| cisoid- <b>E</b> <sub>CO</sub>    | 0.316443 | 0.344308 | 0.259317 | 0.245065           | -2444.402086         | -2444.374222         | -2444.459212         | -2446.307026                         | -2446.061961               |
| cisoid- <b>TS4</b>                | 0.610282 | 0.655504 | 0.532012 | 0.511302           | -3285.568685         | -3285.523462         | -3285.646955         | -3288.668236                         | -3288.156934               |
| transoid- <b>TS4</b>              | 0.608329 | 0.653798 | 0.528859 | 0.507906           | -3285.569671         | -3285.524202         | -3285.649141         | -3288.666203                         | -3288.158297               |
| cisoid- <b>TS5</b>                | 0.606568 | 0.652351 | 0.526853 | 0.505807           | -3285.562126         | -3285.516343         | -3285.641841         | -3288.658472                         | -3288.152665               |
| cisoid- <b>TS6</b>                | 0.328427 | 0.358498 | 0.267291 | 0.251995           | -5018.739804         | -5018.709733         | -5018.800940         | -5020.976572                         | -5020.724577               |
| cisoid- <b>A</b> <sub>pre</sub>   | 0.329348 | 0.360113 | 0.267567 | 0.252046           | -5018.772845         | -5018.742080         | -5018.834627         | -5021.007271                         | -5020.755225               |
| transoid- <b>TS6</b>              | 0.328874 | 0.358745 | 0.268699 | 0.253598           | -5018.737661         | -5018.707791         | -5018.797836         | -5020.974321                         | -5020.720723               |
| transoid- <b>A</b> <sub>pre</sub> | 0.329534 | 0.360269 | 0.267977 | 0.252500           | -5018.770656         | -5018.739922         | -5018.832213         | -5021.005711                         | -5020.753211               |

## II. $^1\text{H}$ NMR and $^{13}\text{C}$ NMR Spectrum of All Products.

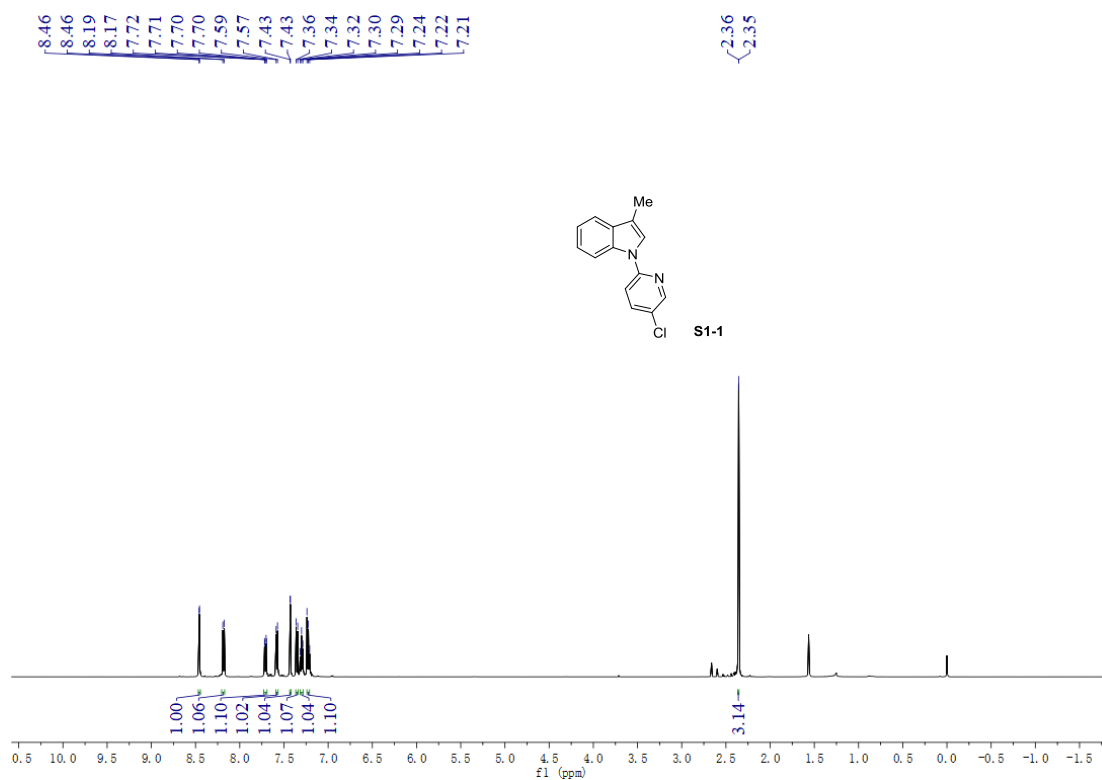

Supplementary Fig. 10 |  $^1\text{H}$  NMR (500 MHz) of compound S1-1 (using  $\text{CDCl}_3$  as solvent)

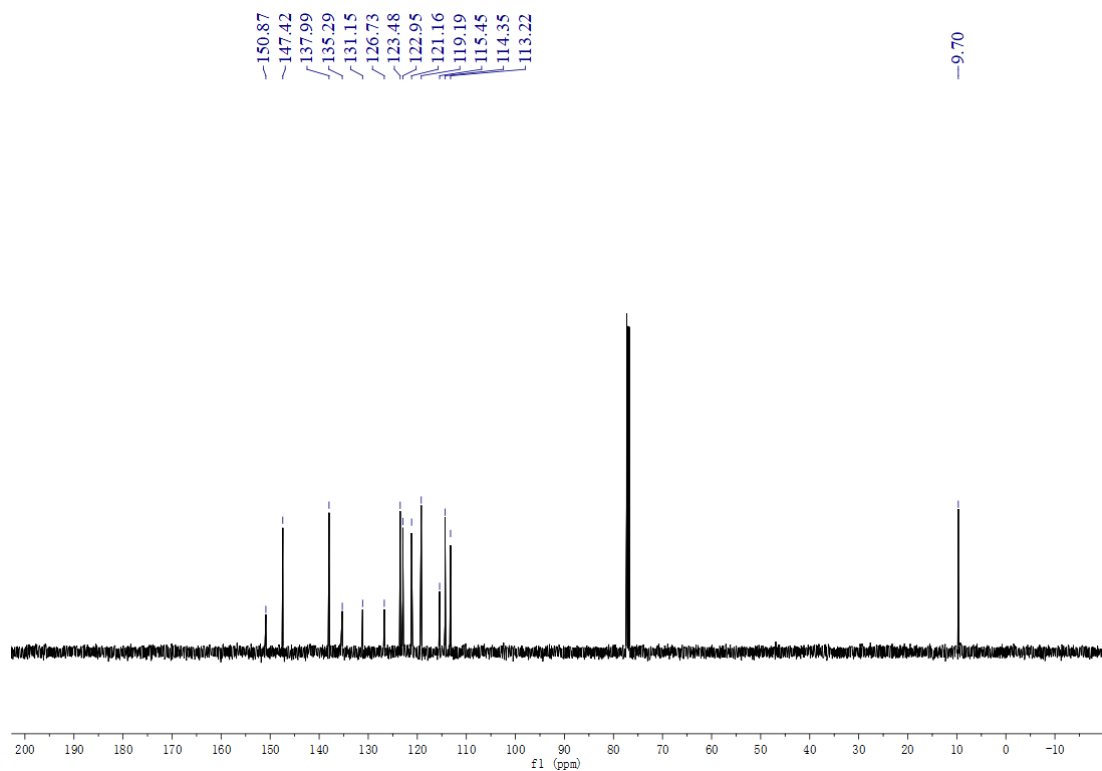

Supplementary Fig. 11 |  $^{13}\text{C}$  NMR (126 MHz) of compound S1-1 (using  $\text{CDCl}_3$  as solvent)



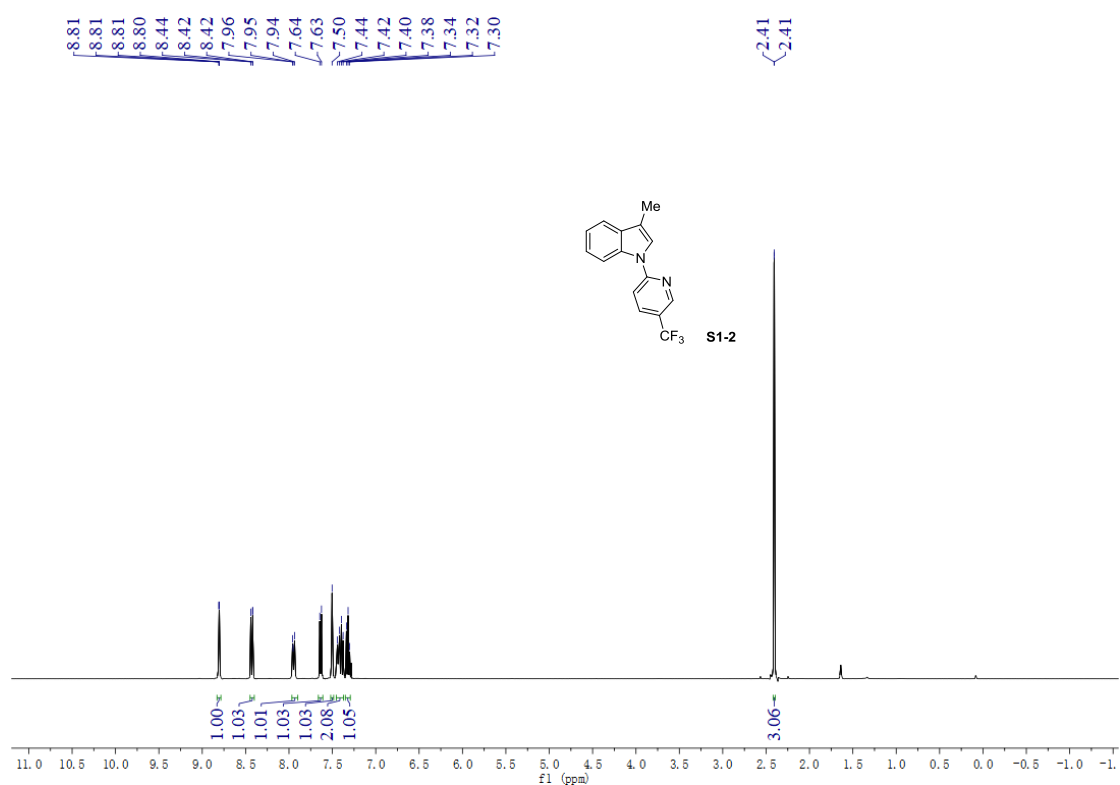

**Supplementary Fig. 12 | <sup>1</sup>H NMR (400 MHz) of compound S1-2 (using CDCl<sub>3</sub> as solvent)**

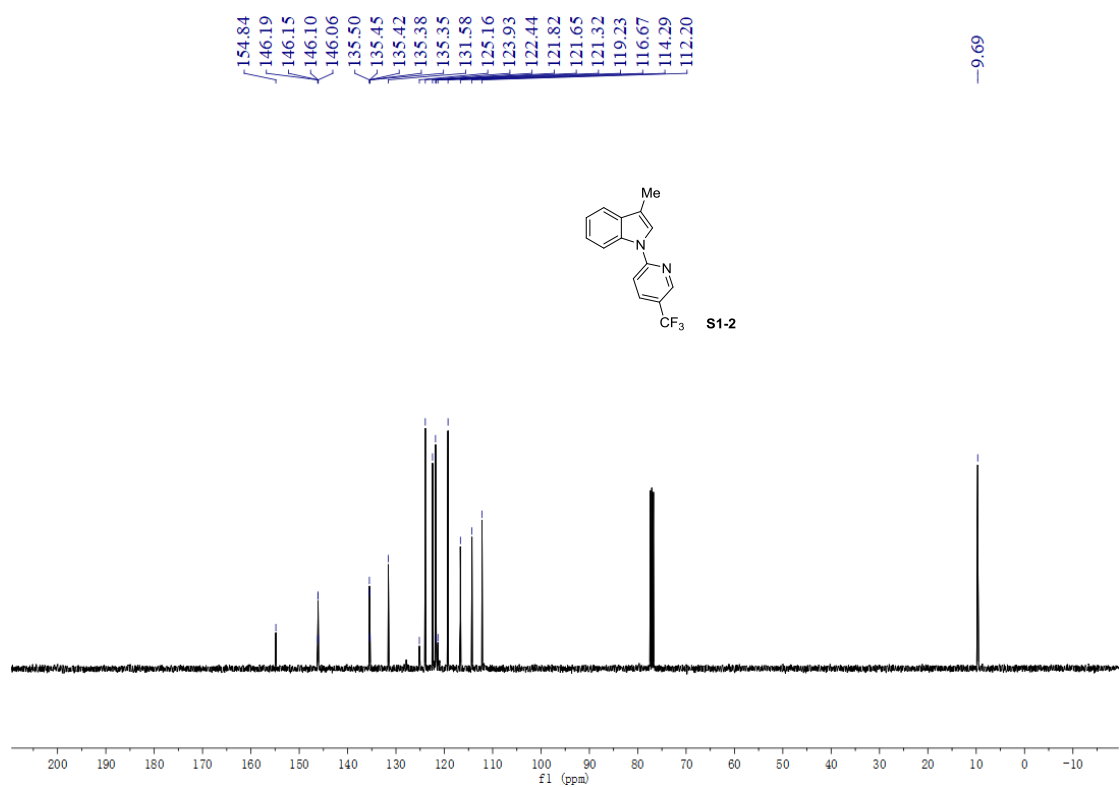

**Supplementary Fig. 13 | <sup>13</sup>C NMR (101 MHz) of compound S1-2 (using CDCl<sub>3</sub> as solvent)**

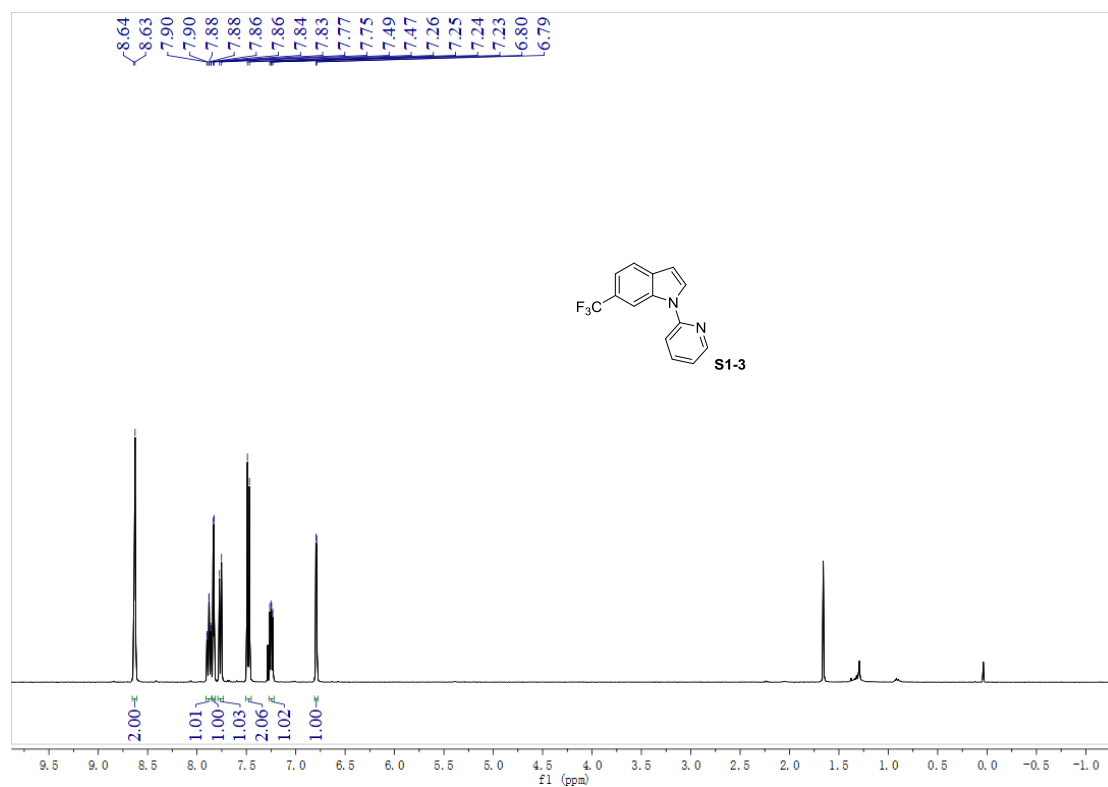

**Supplementary Fig. 14 | <sup>1</sup>H NMR (400 MHz) of compound S1-3 (using CDCl<sub>3</sub> as solvent)**

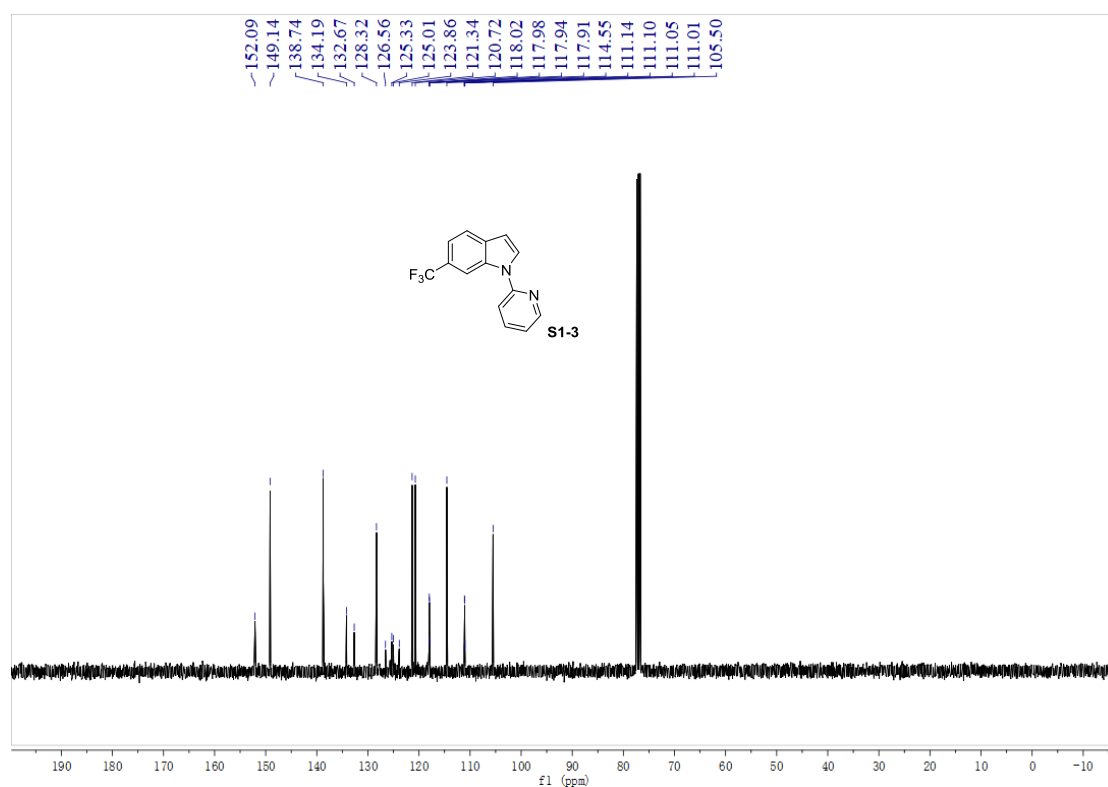

**Supplementary Fig. 15 | <sup>13</sup>C NMR (101 MHz) of compound S1-3 (using CDCl<sub>3</sub> as solvent)**

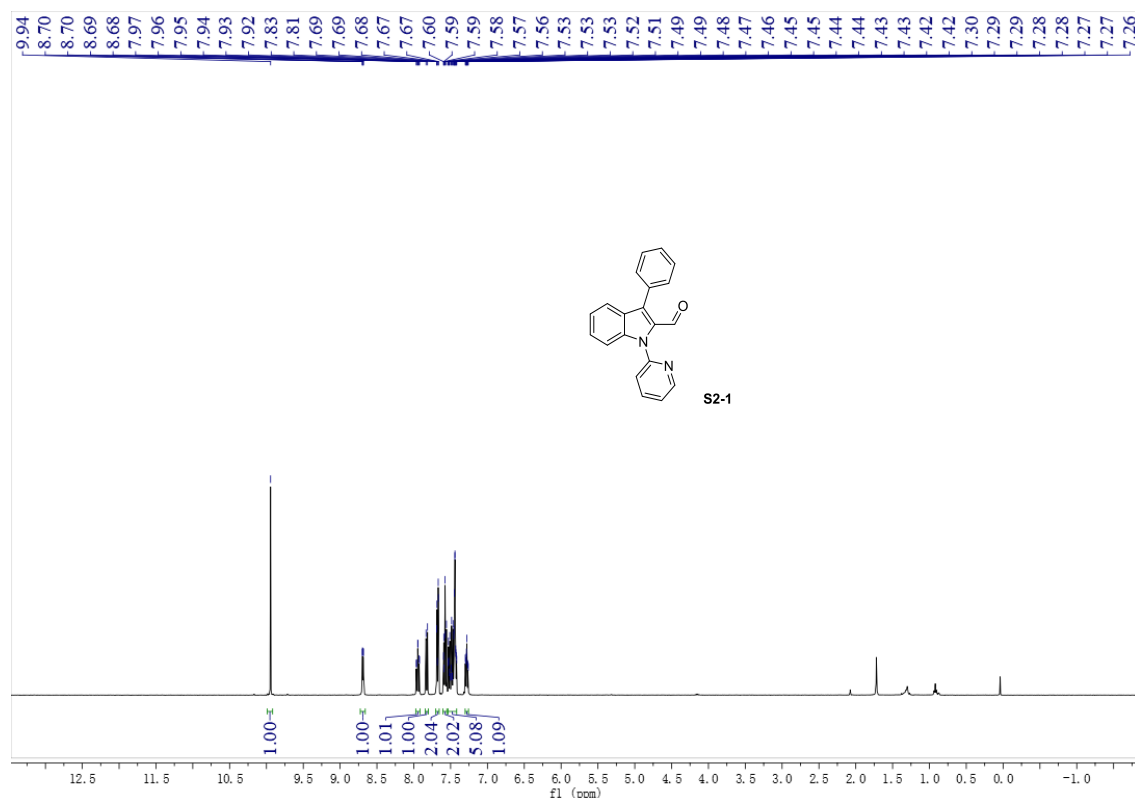

Supplementary Fig. 16 | <sup>1</sup>H NMR (400 MHz) of compound S2-1 (using CDCl<sub>3</sub> as solvent)

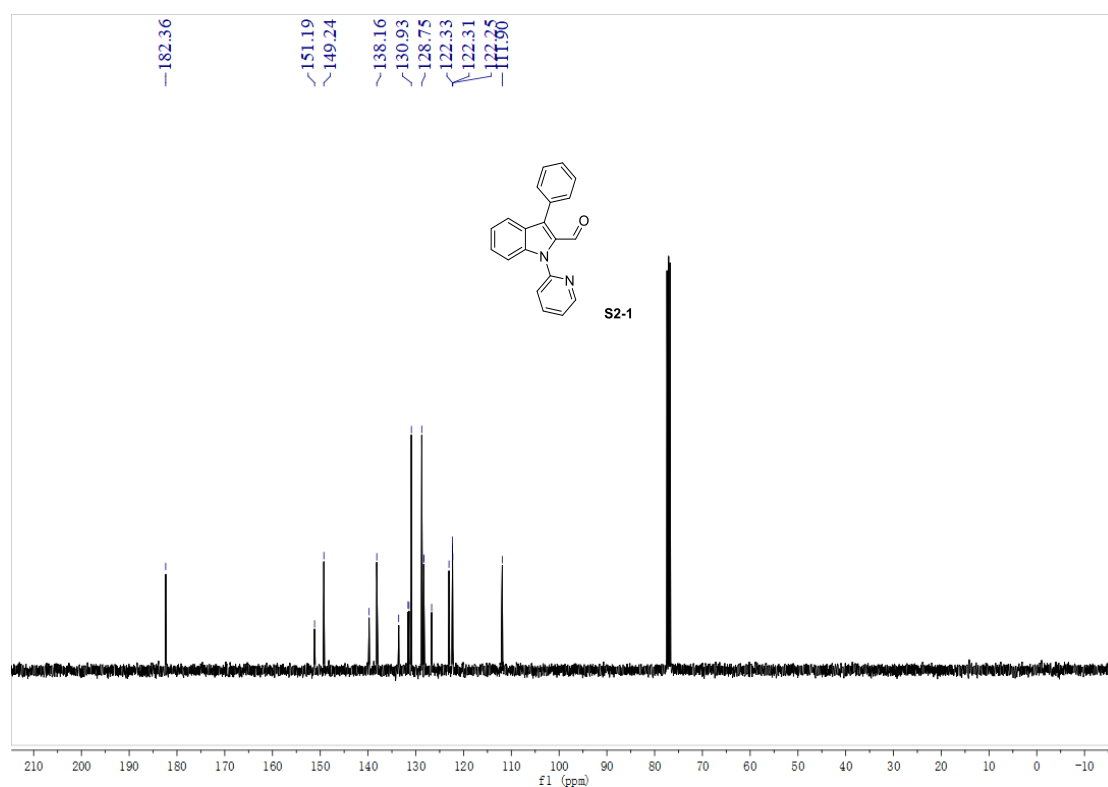

Supplementary Fig. 17 | <sup>13</sup>C NMR (101 MHz) of compound S2-1 (using CDCl<sub>3</sub> as solvent)

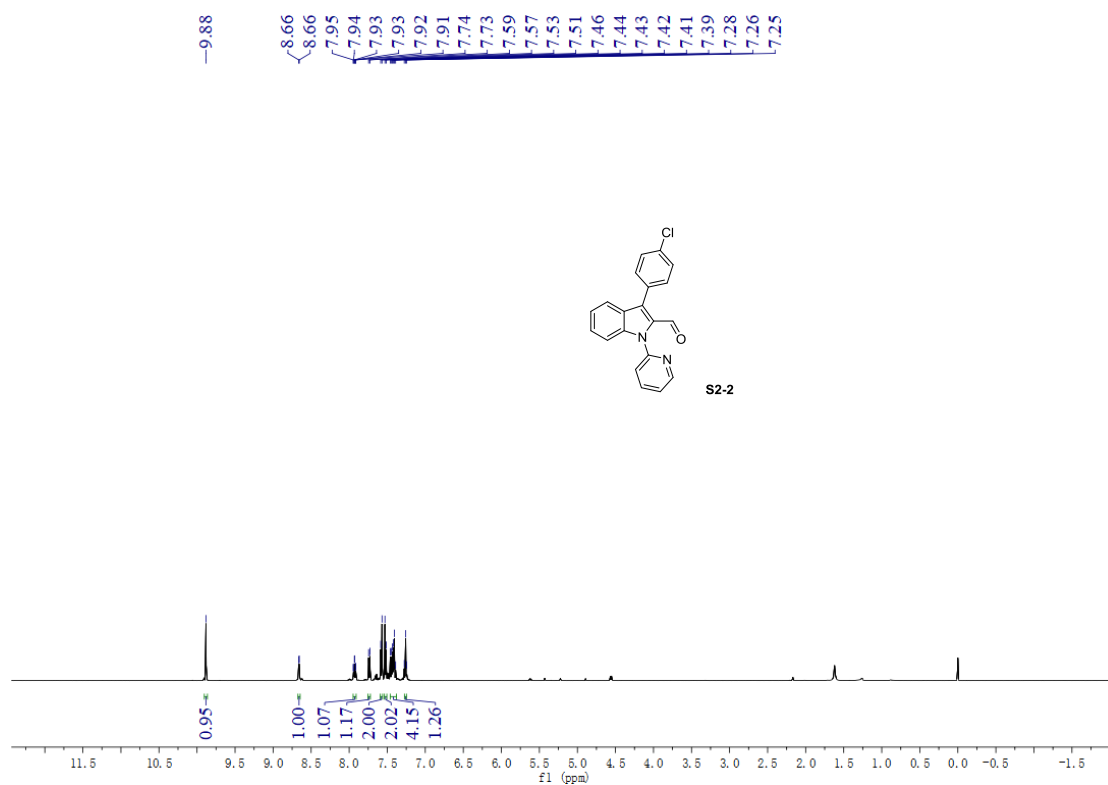

Supplementary Fig. 18 | <sup>1</sup>H NMR (500 MHz) of compound S2-2 (using CDCl<sub>3</sub> as solvent)

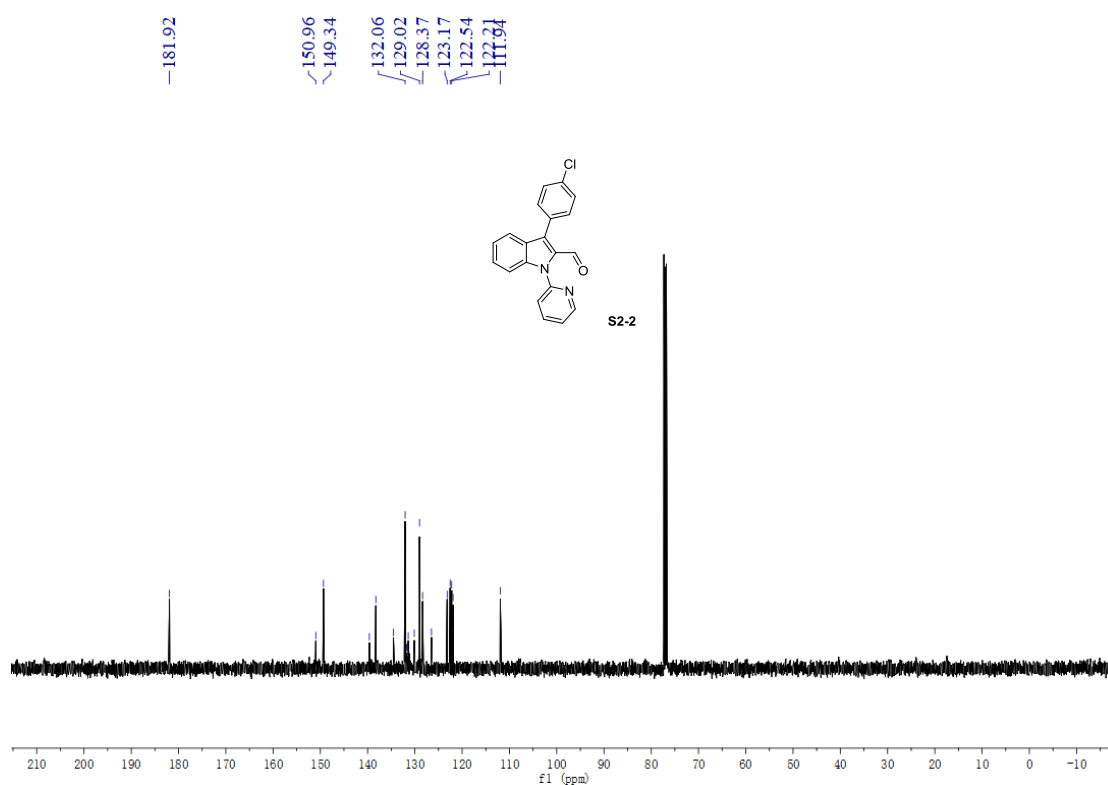

Supplementary Fig. 19 | <sup>13</sup>C NMR (126 MHz) of compound S2-2 (using CDCl<sub>3</sub> as solvent)

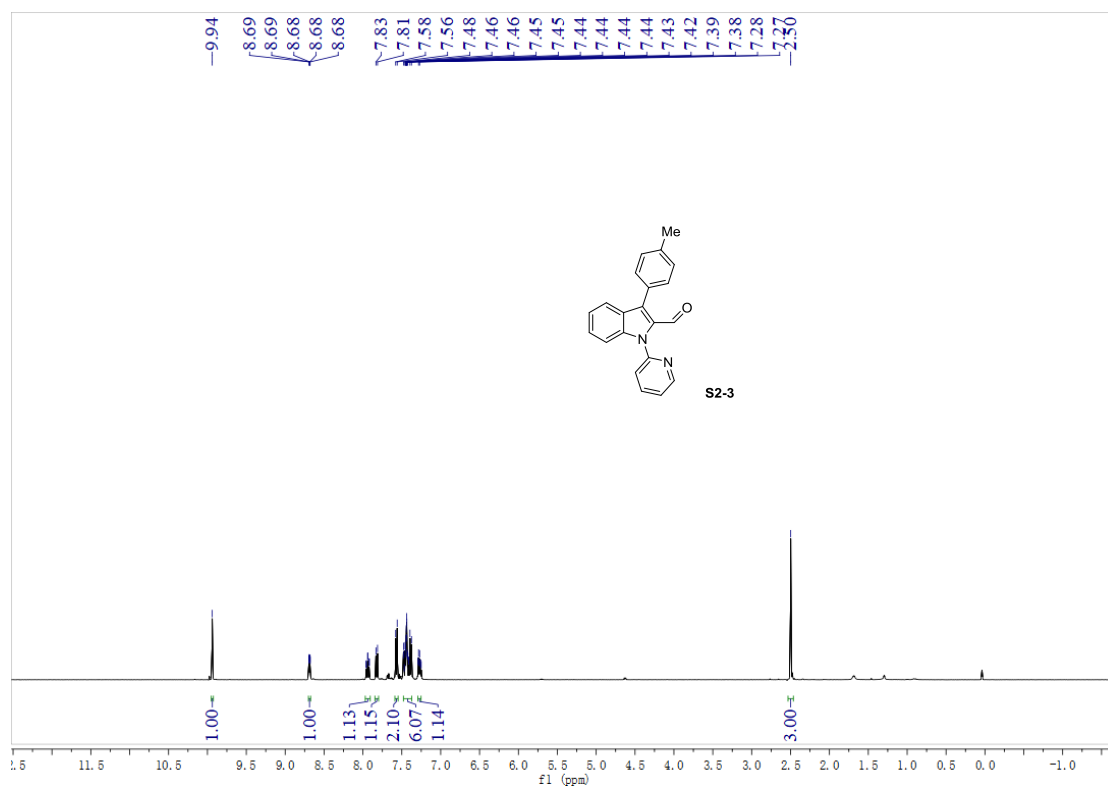

Supplementary Fig. 20 | <sup>1</sup>H NMR (400 MHz) of compound S2-3 (using CDCl<sub>3</sub> as solvent)

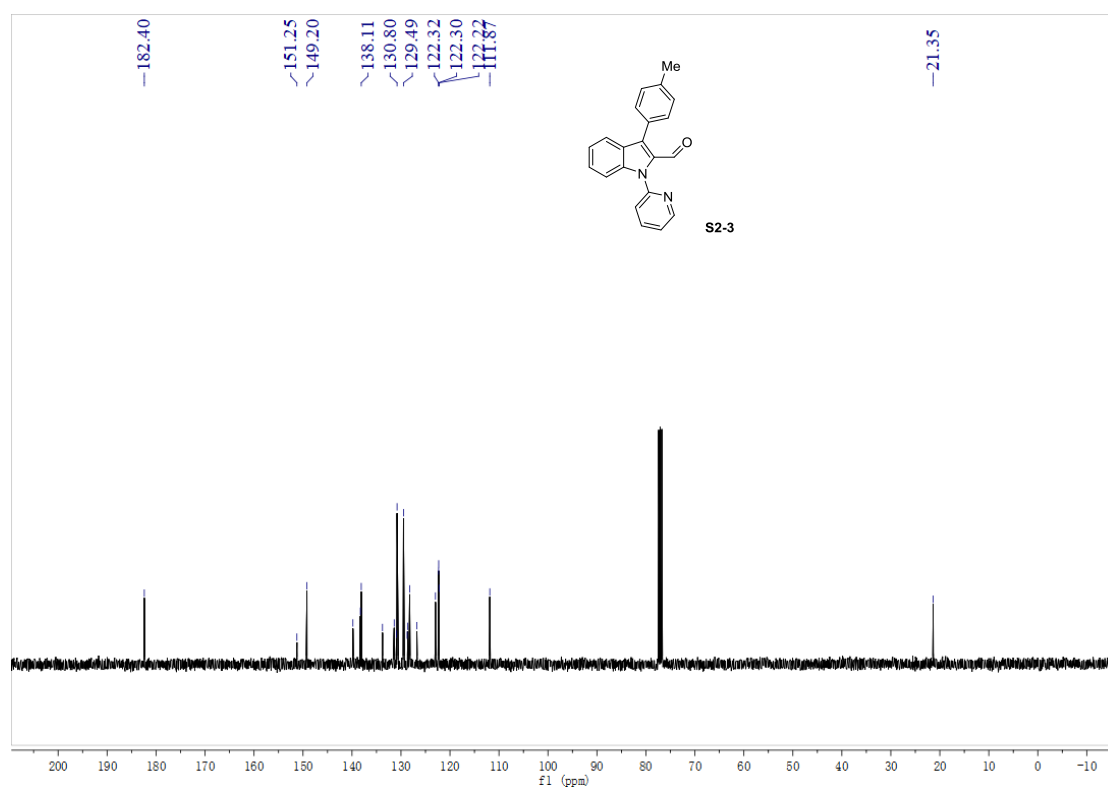

Supplementary Fig. 21 | <sup>13</sup>C NMR (101 MHz) of compound S2-3 (using CDCl<sub>3</sub> as solvent)

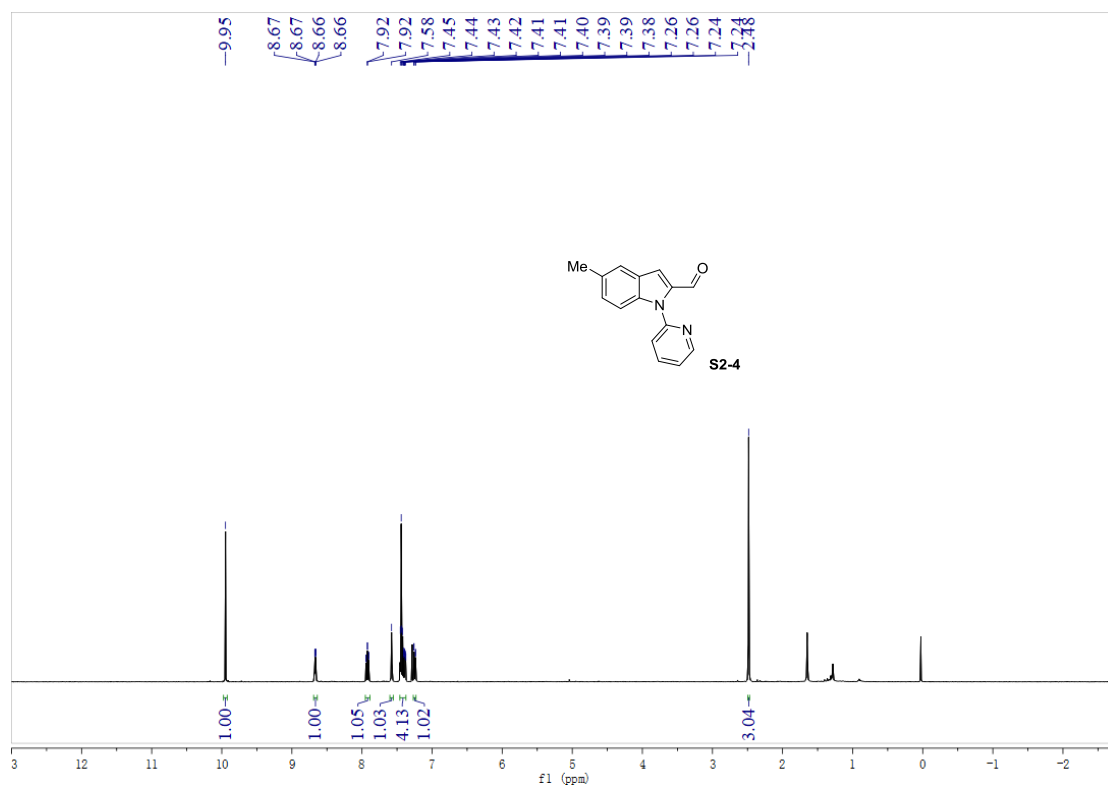

Supplementary Fig. 22 |  $^1\text{H}$  NMR (400 MHz) of compound S2-4 (using  $\text{CDCl}_3$  as solvent)

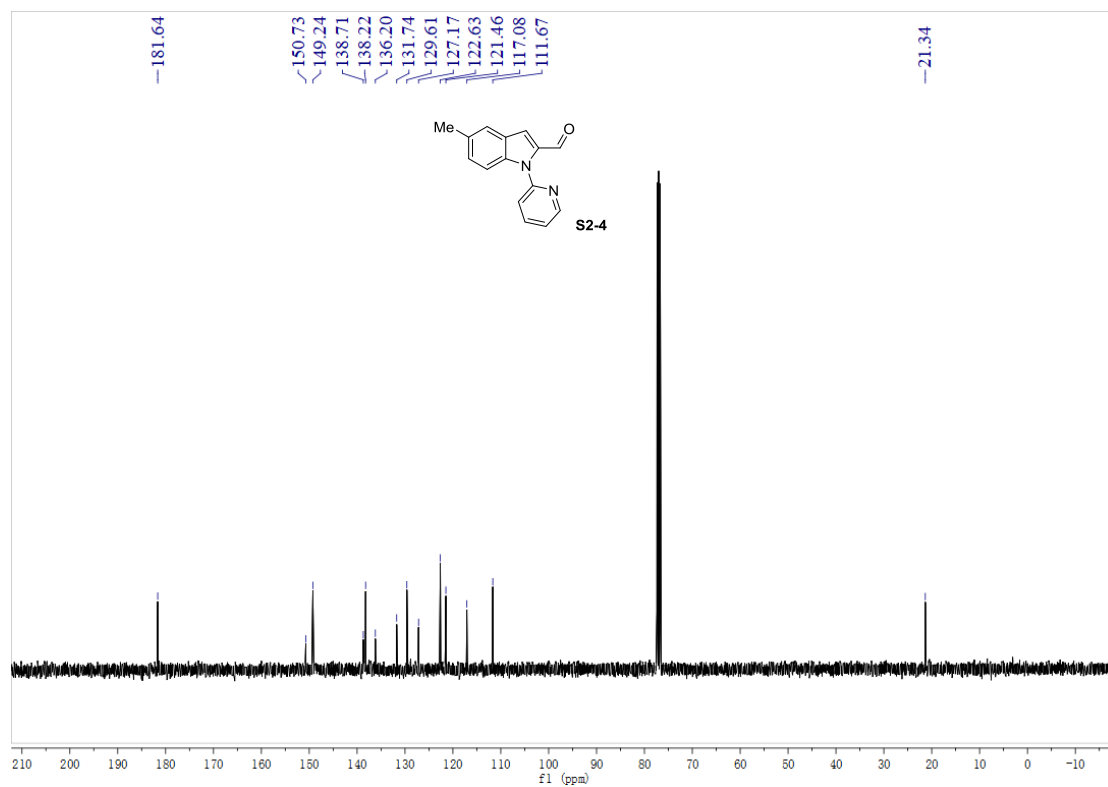

Supplementary Fig. 23 |  $^{13}\text{C}$  NMR (101 MHz) of compound S2-4 (using  $\text{CDCl}_3$  as solvent)

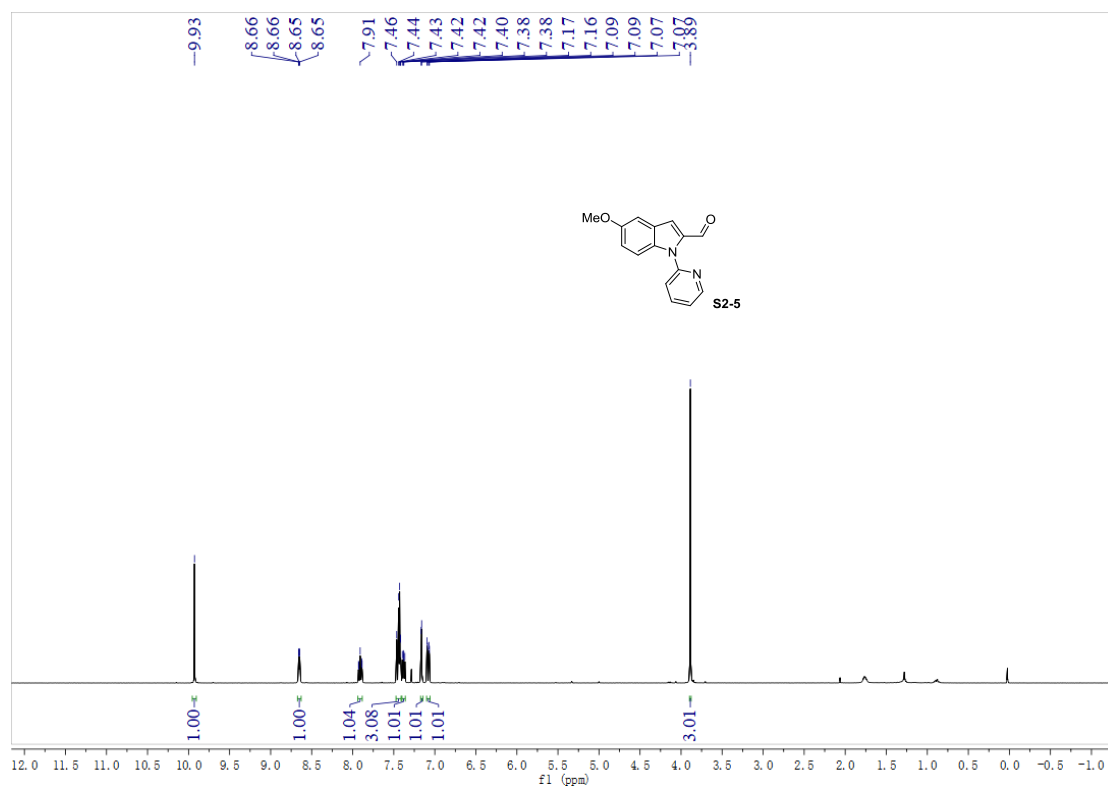

Supplementary Fig. 24 | <sup>1</sup>H NMR (400 MHz) of compound S2-5 (using CDCl<sub>3</sub> as solvent)

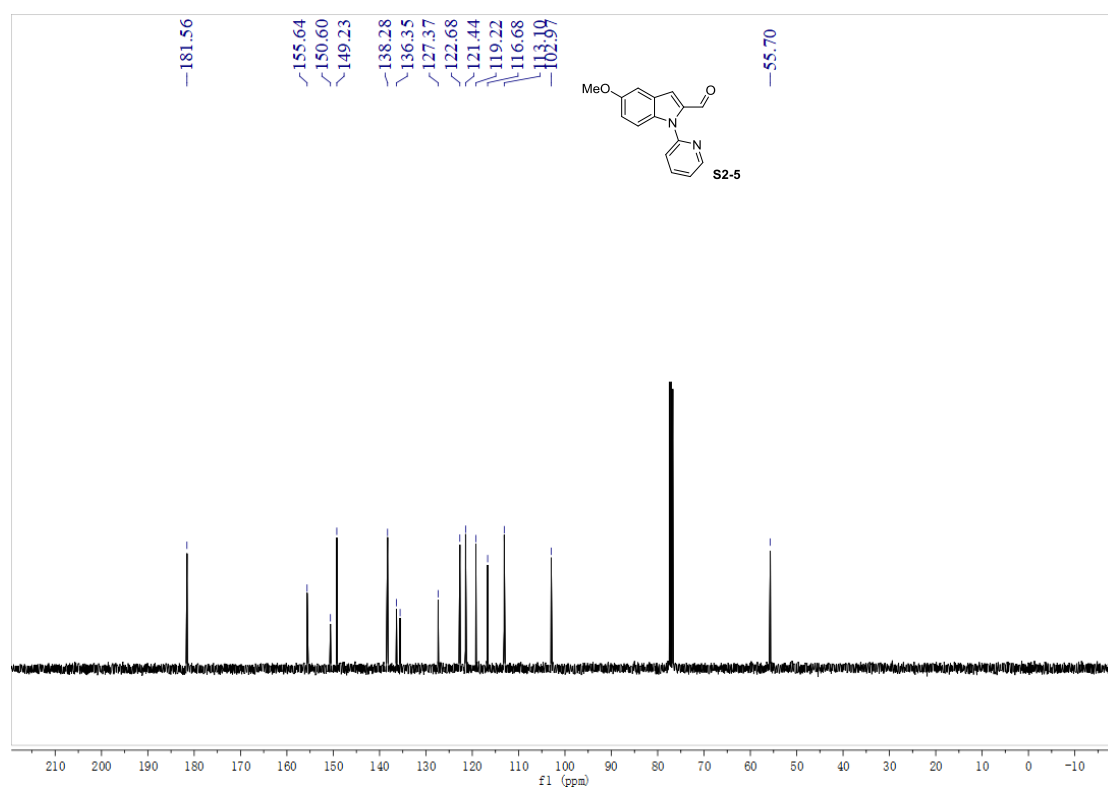

Supplementary Fig. 25 | <sup>13</sup>C NMR (101 MHz) of compound S2-5 (using CDCl<sub>3</sub> as solvent)

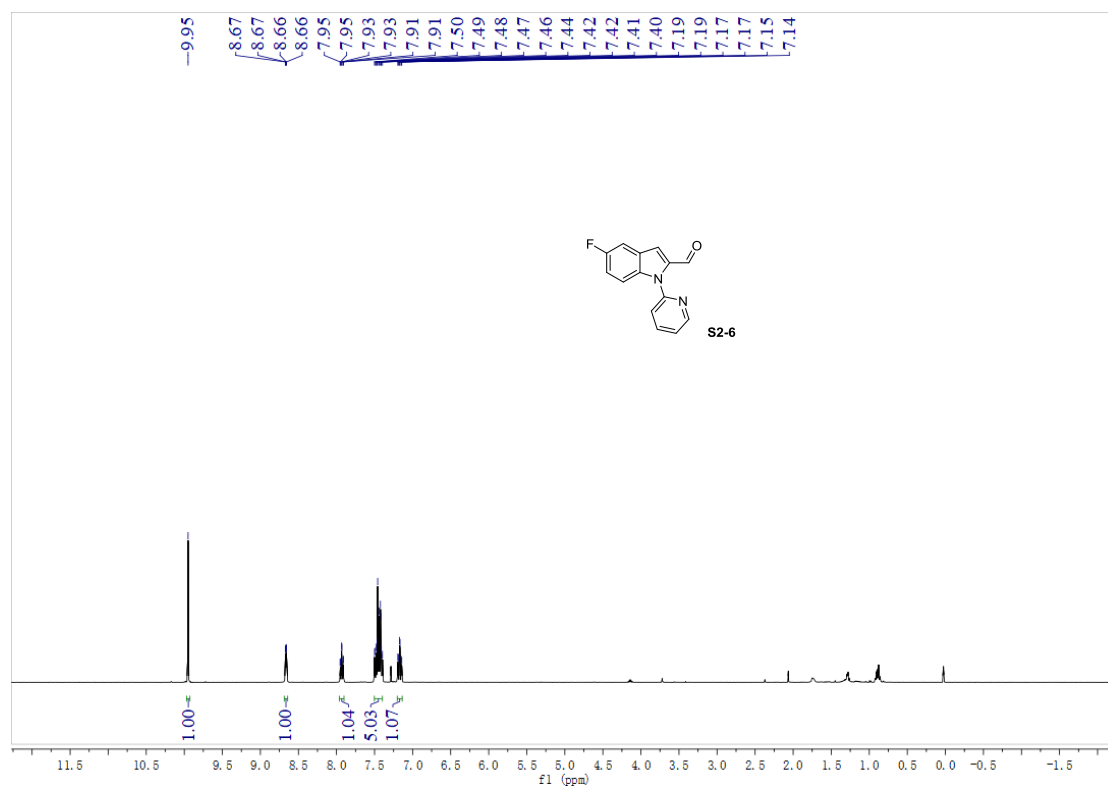

Supplementary Fig. 26 | <sup>1</sup>H NMR (400 MHz) of compound S2-6 (using CDCl<sub>3</sub> as solvent)

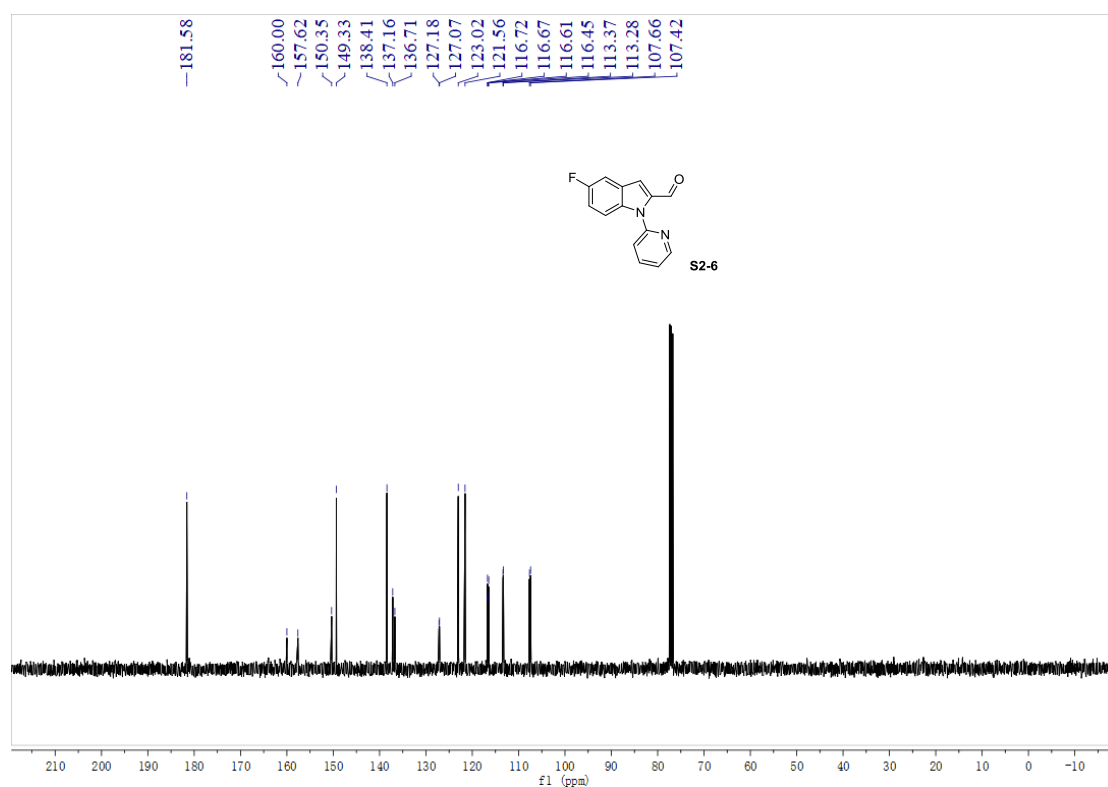

Supplementary Fig. 27 | <sup>13</sup>C NMR (101 MHz) of compound S2-6 (using CDCl<sub>3</sub> as solvent)



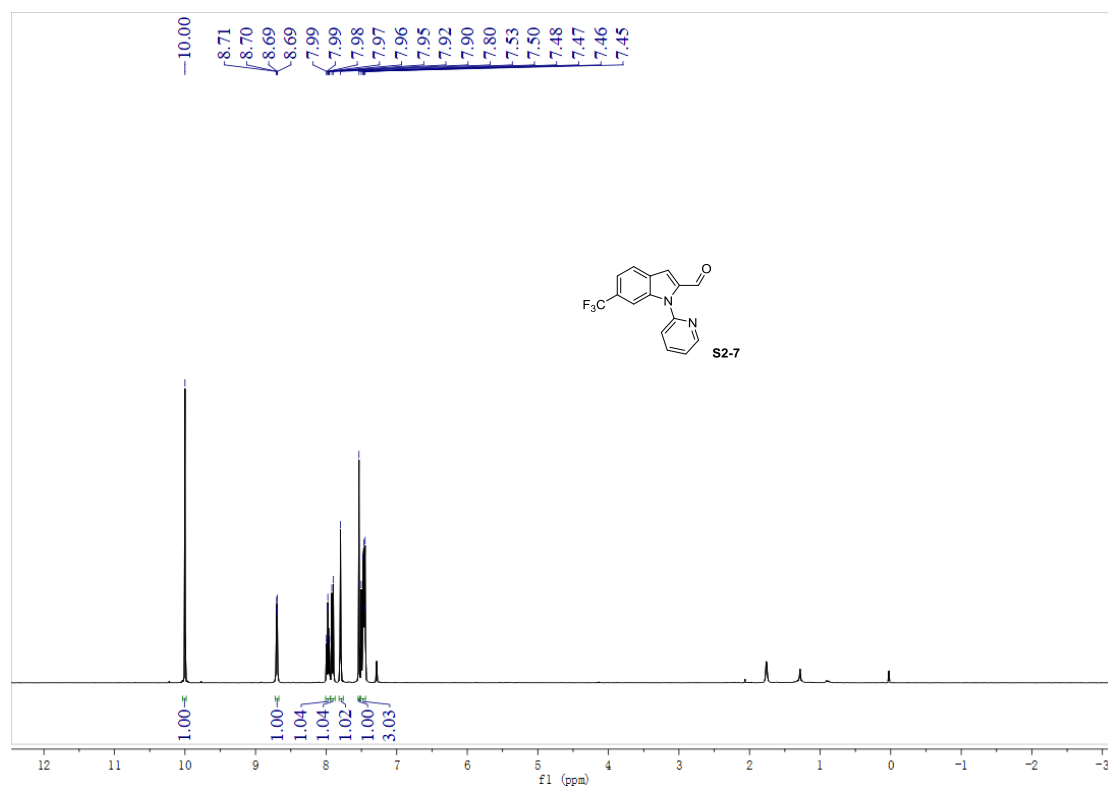

Supplementary Fig. 28 |  $^1\text{H}$  NMR (400 MHz) of compound S2-7 (using  $\text{CDCl}_3$  as solvent)

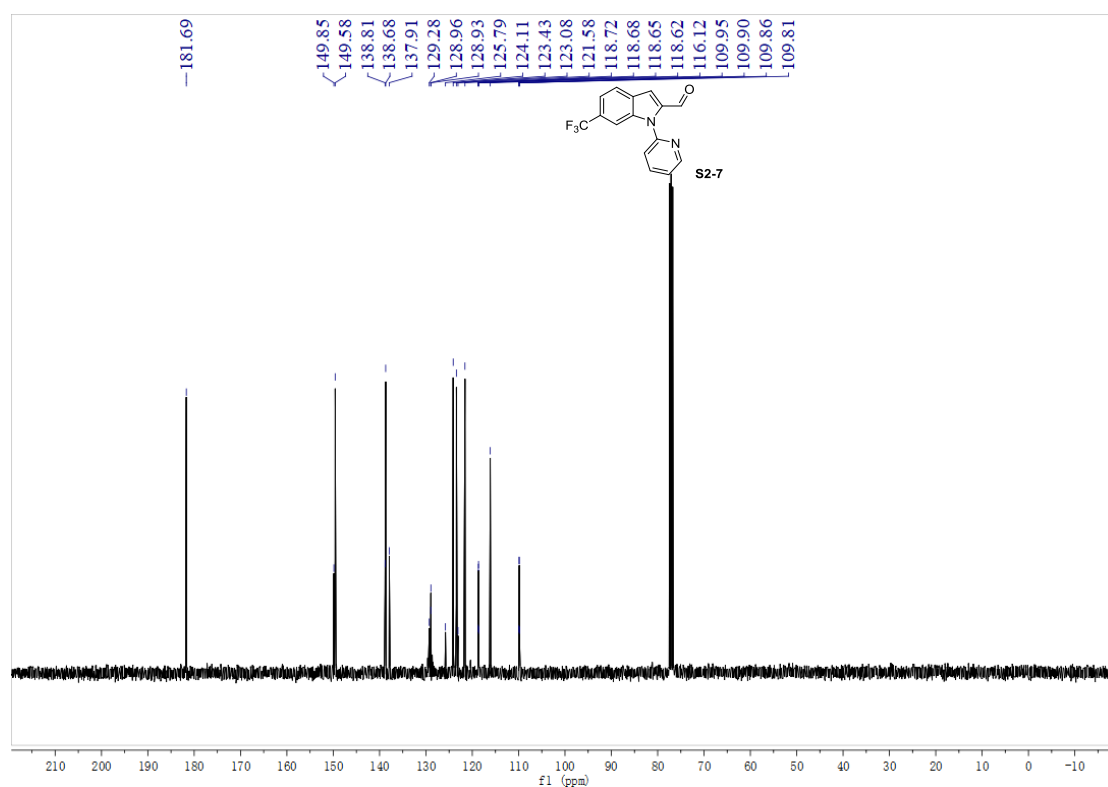

Supplementary Fig. 29 |  $^{13}\text{C}$  NMR (101 MHz) of compound S2-7 (using  $\text{CDCl}_3$  as solvent)

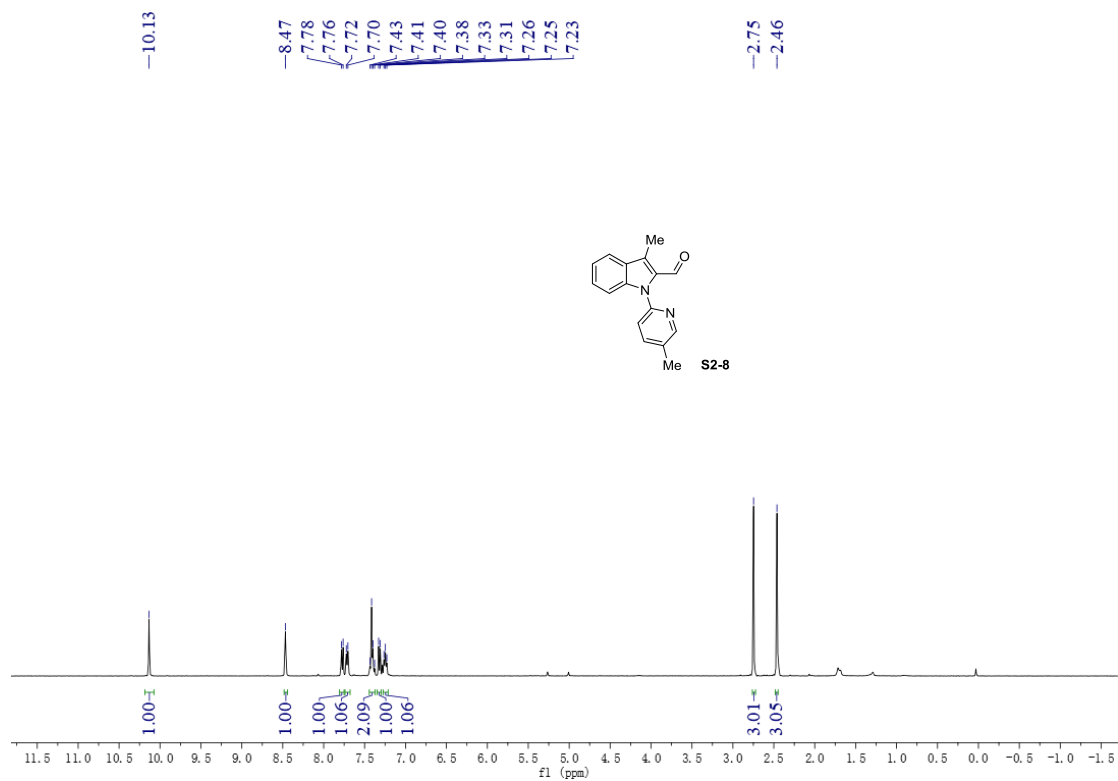

Supplementary Fig. 30 | <sup>1</sup>H NMR (400 MHz) of compound S2-8 (using CDCl<sub>3</sub> as solvent)

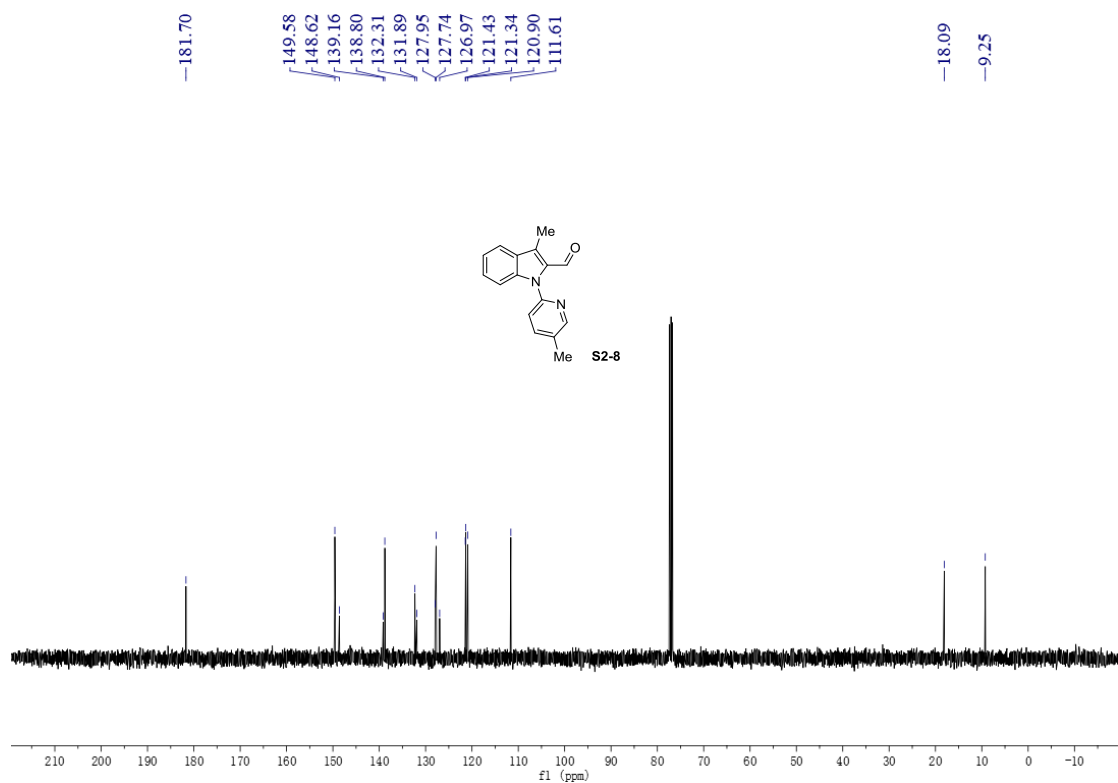

Supplementary Fig. 31 | <sup>13</sup>C NMR (101 MHz) of compound S2-8 (using CDCl<sub>3</sub> as solvent)

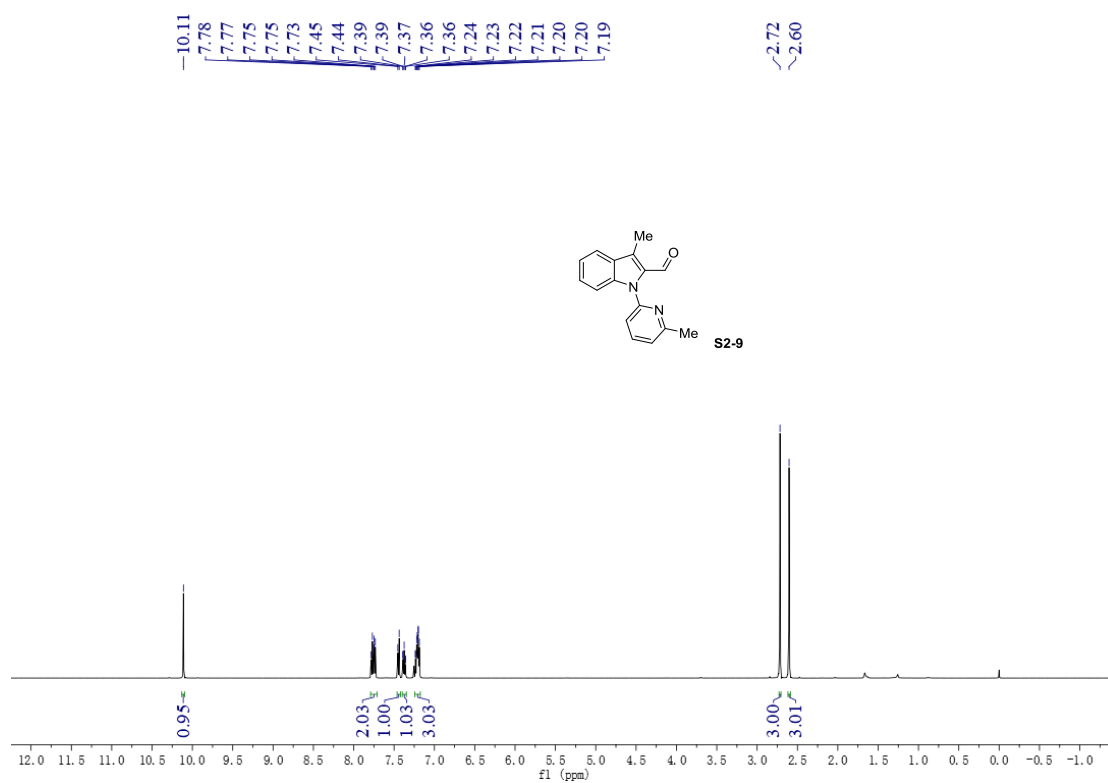

Supplementary Fig. 32 | <sup>1</sup>H NMR (500 MHz) of compound S2-9 (using CDCl<sub>3</sub> as solvent)

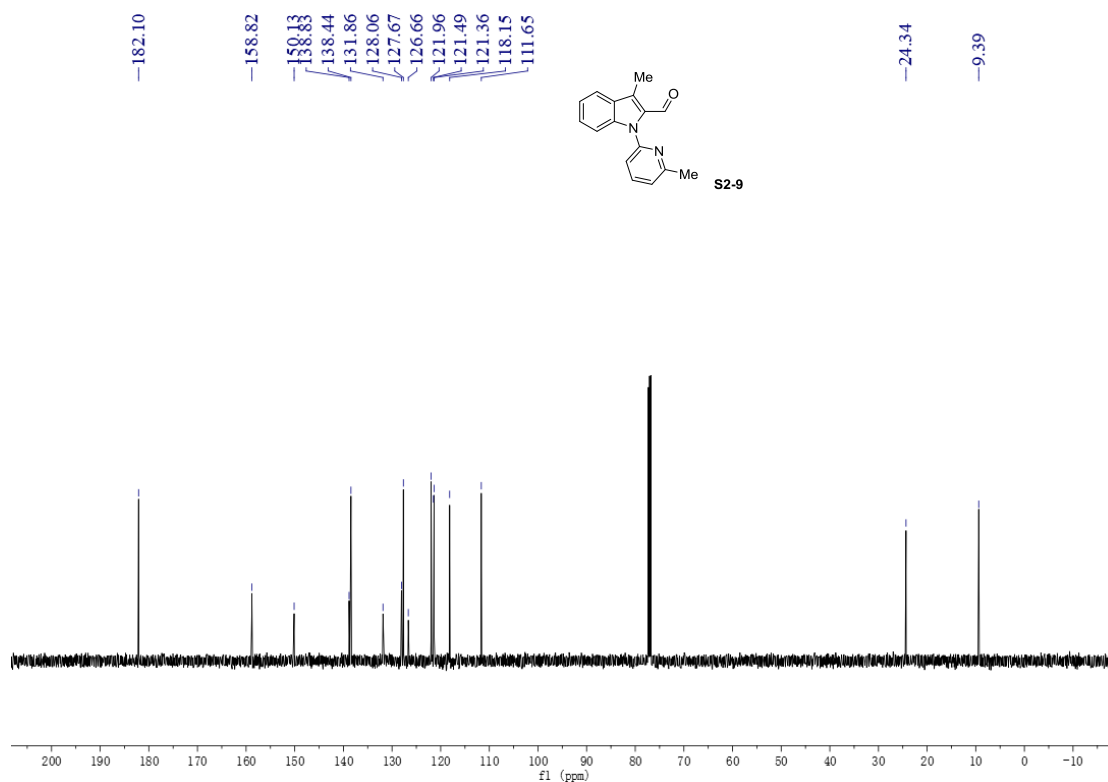

Supplementary Fig. 33 | <sup>13</sup>C NMR (126 MHz) of compound S2-9 (using CDCl<sub>3</sub> as solvent)

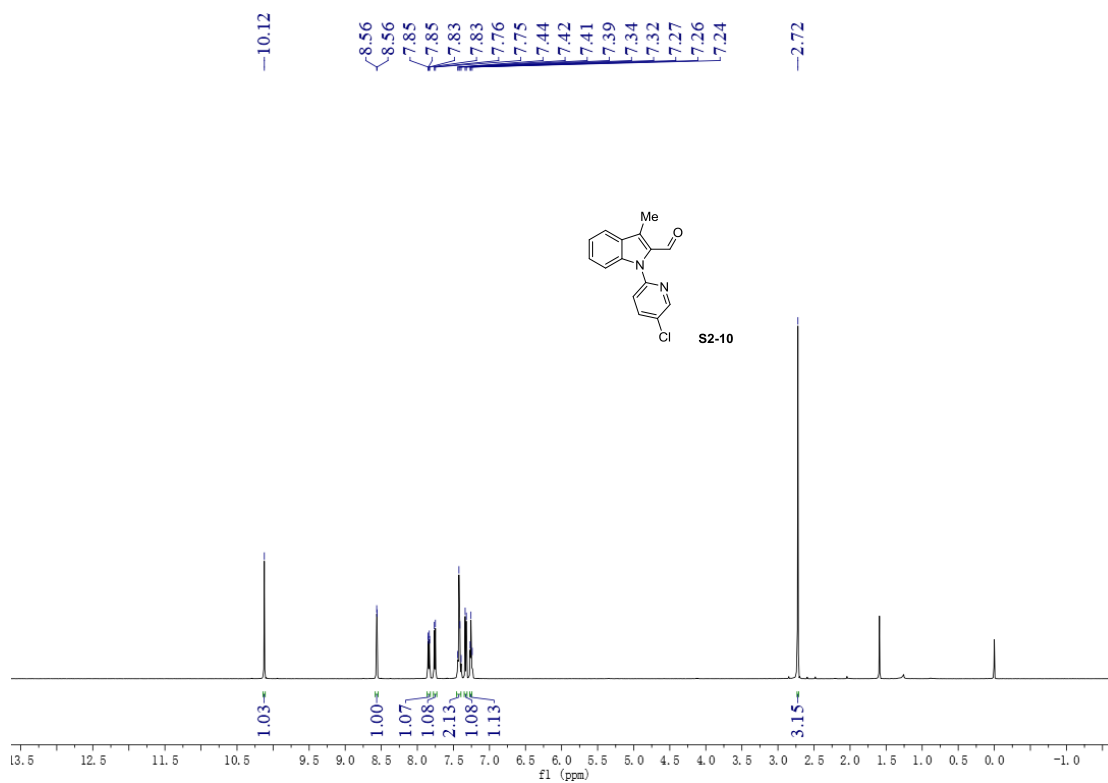

Supplementary Fig. 34 | <sup>1</sup>H NMR (500 MHz) of compound S2-10 (using CDCl<sub>3</sub> as solvent)

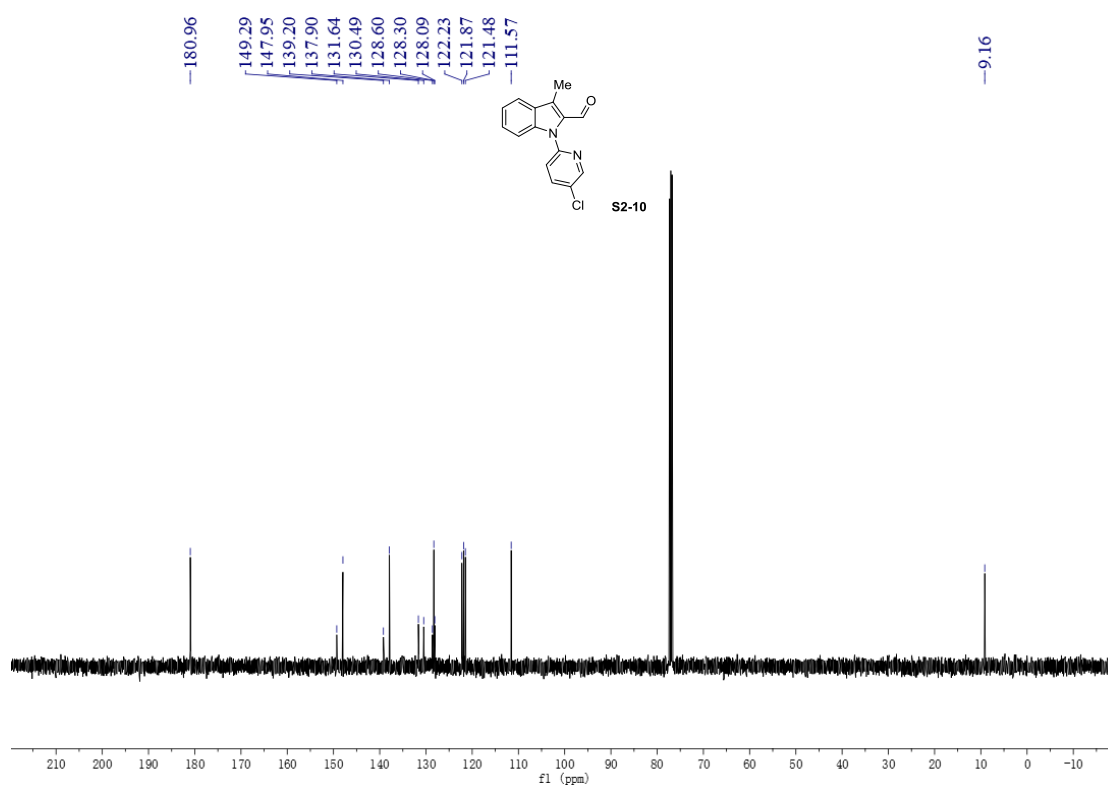

Supplementary Fig. 35 | <sup>13</sup>C NMR (126 MHz) of compound S2-10 (using CDCl<sub>3</sub> as solvent)

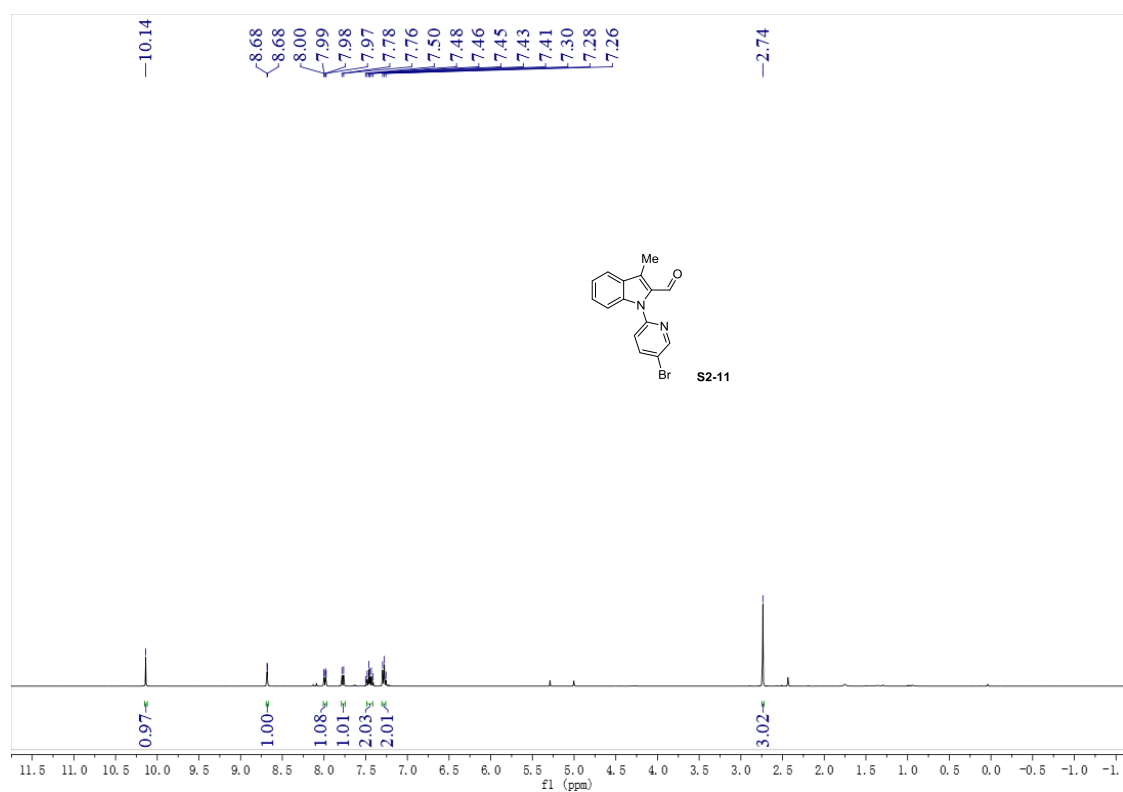

Supplementary Fig. 36 | <sup>1</sup>H NMR (400 MHz) of compound S2-11 (using CDCl<sub>3</sub> as solvent)

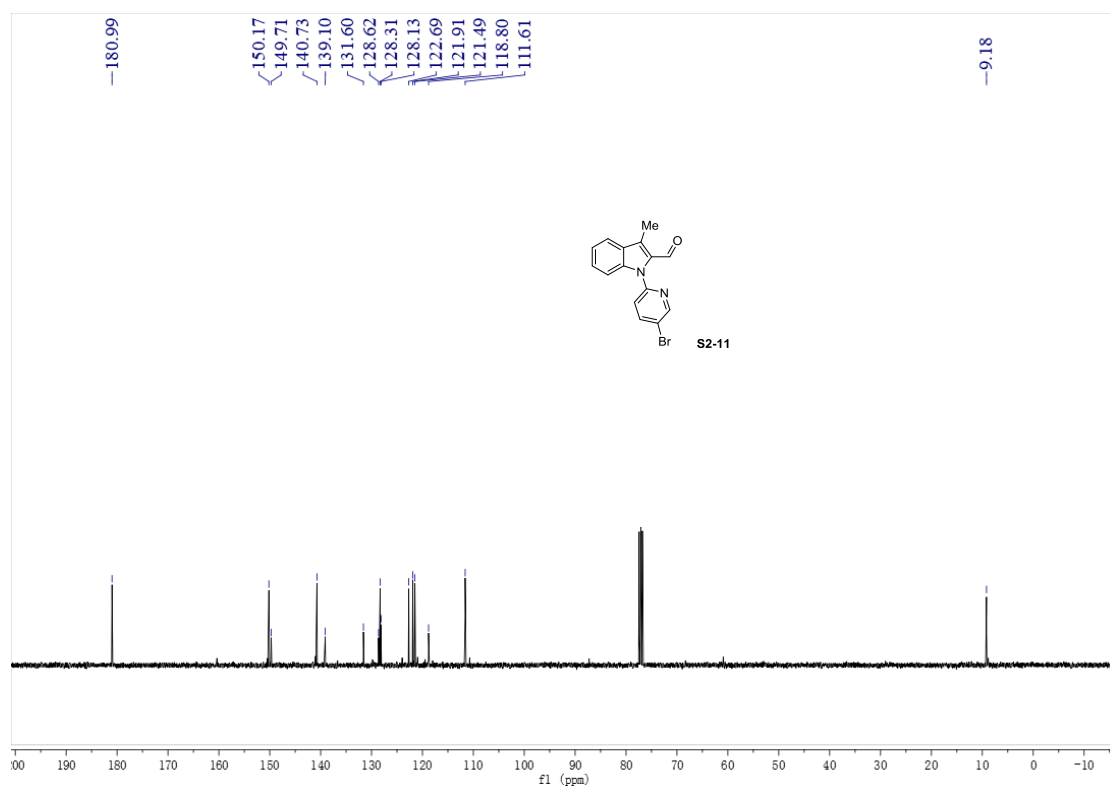

Supplementary Fig. 37 | <sup>13</sup>C NMR (101 MHz) of compound S2-11 (using CDCl<sub>3</sub> as solvent)

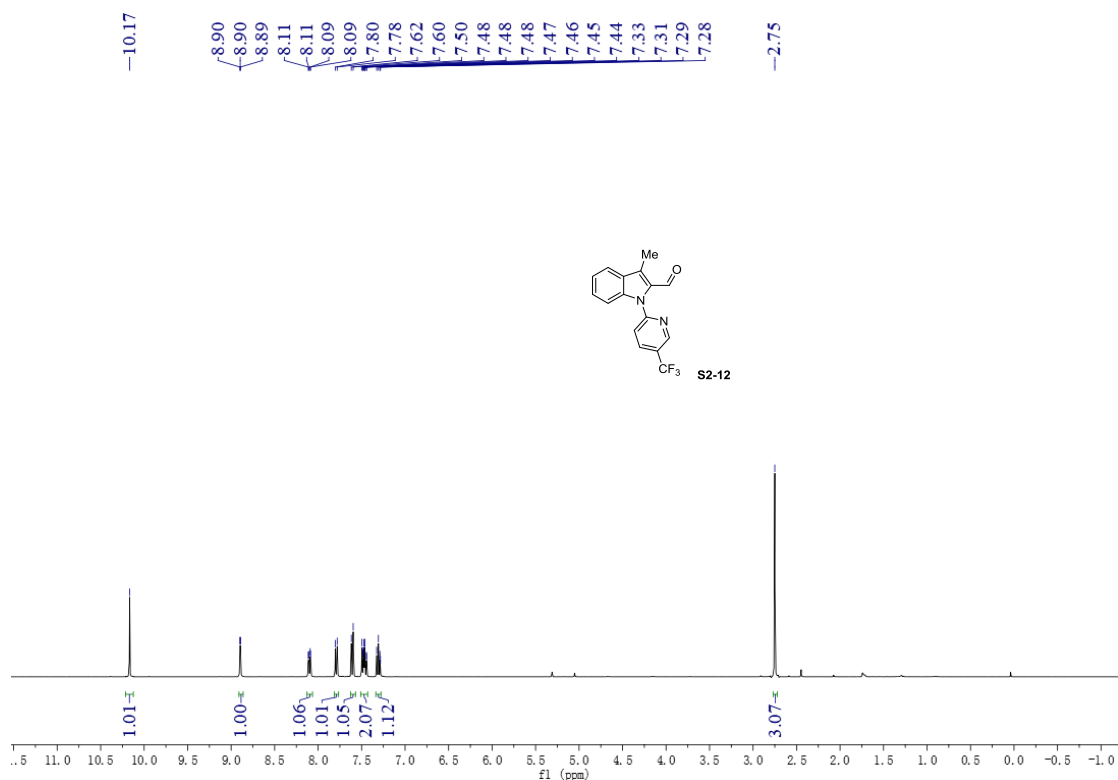

Supplementary Fig. 38 | <sup>1</sup>H NMR (400 MHz) of compound S2-12 (using CDCl<sub>3</sub> as solvent)

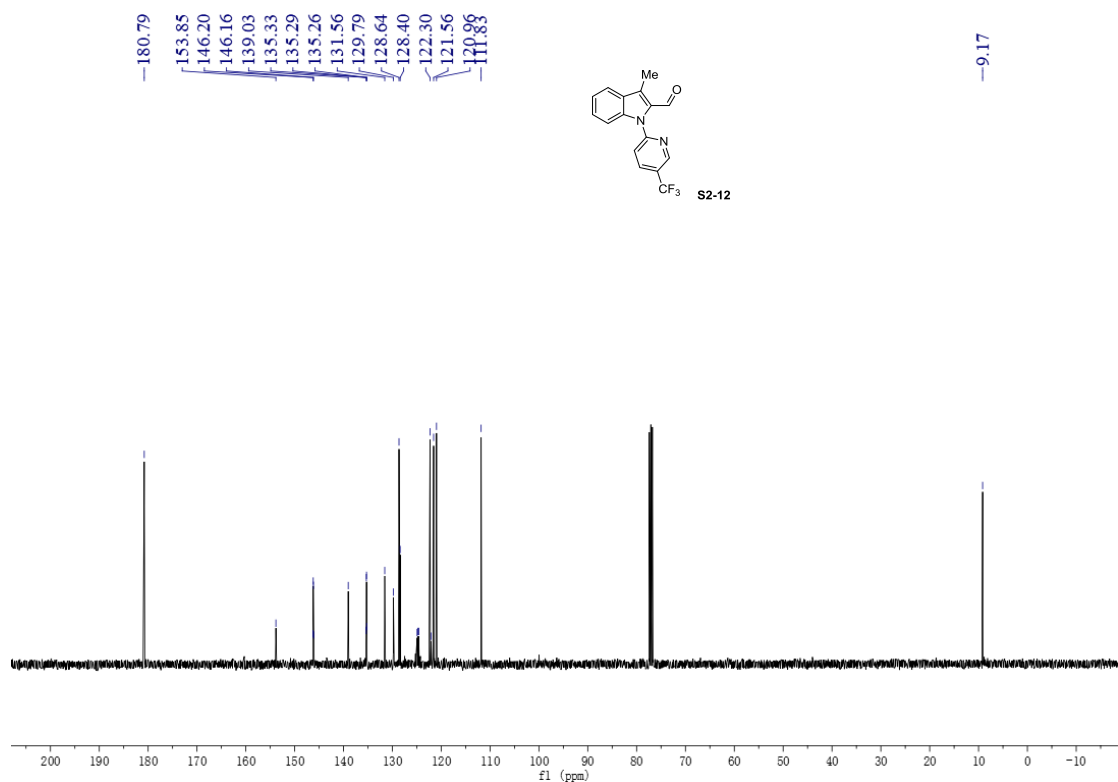

Supplementary Fig. 39 | <sup>13</sup>C NMR (101 MHz) of compound S2-12 (using CDCl<sub>3</sub> as solvent)

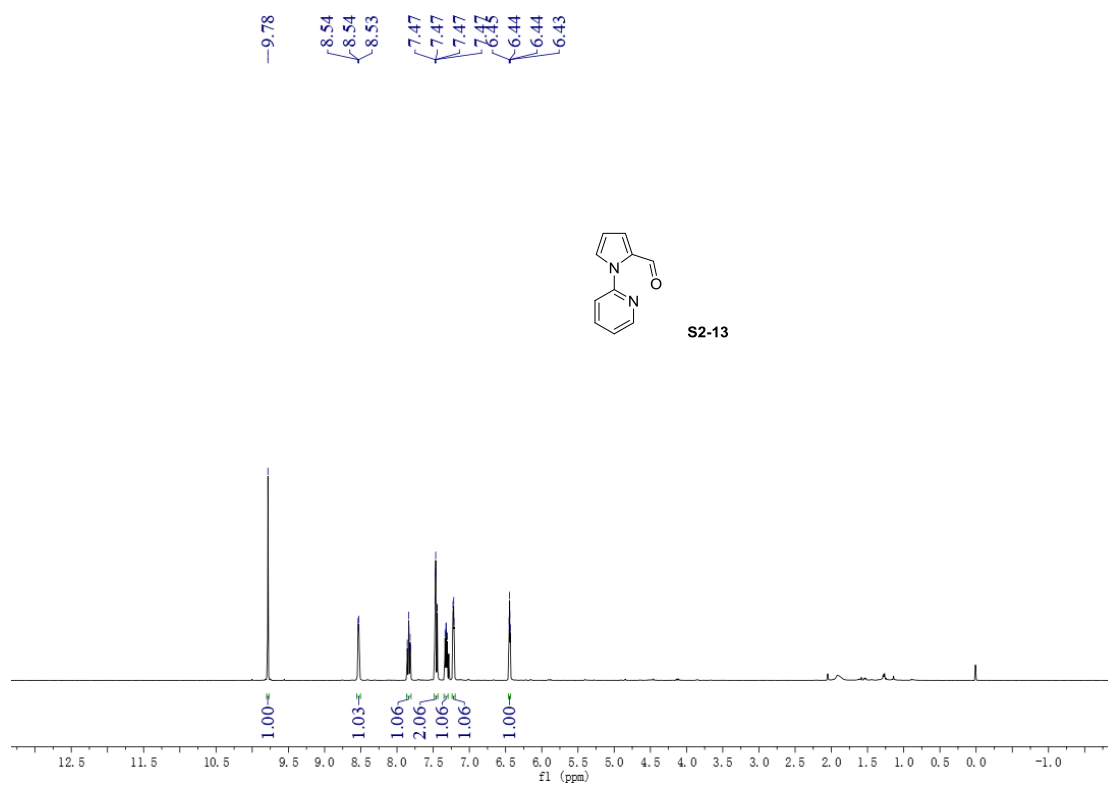

Supplementary Fig. 40 | <sup>1</sup>H NMR (400 MHz) of compound S2-13 (using CDCl<sub>3</sub> as solvent)

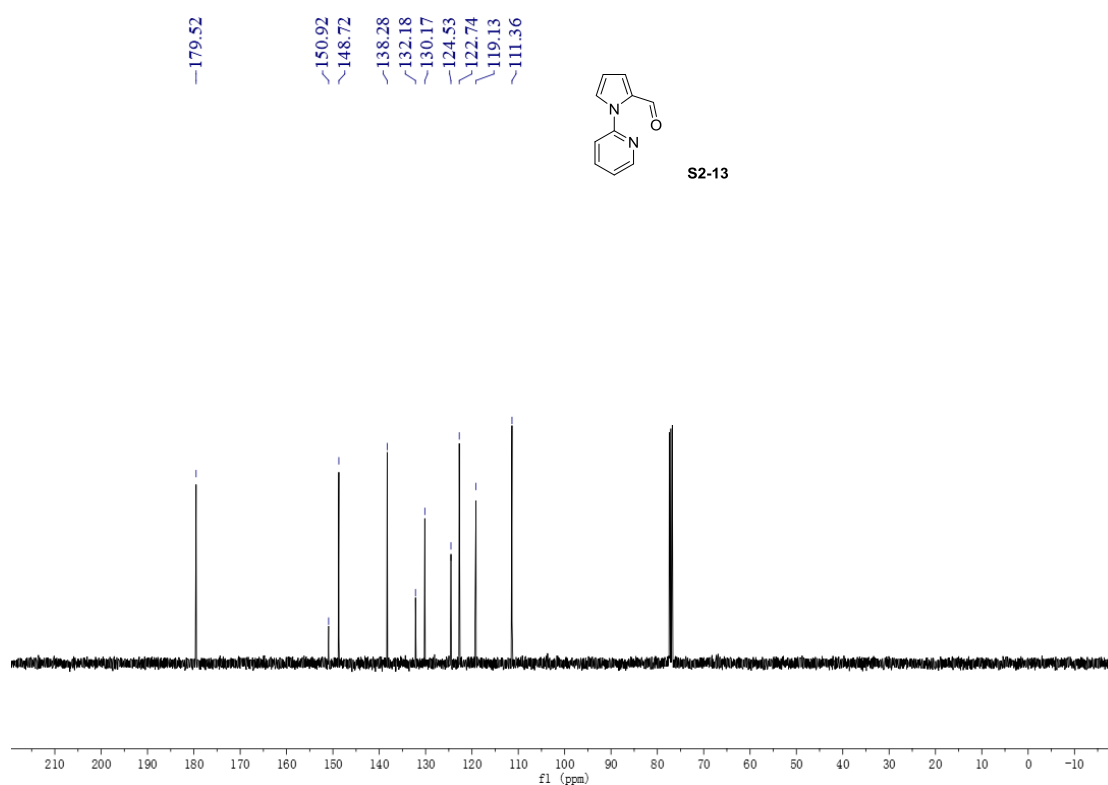

Supplementary Fig. 41 | <sup>13</sup>C NMR (101 MHz) of compound S2-13 (using CDCl<sub>3</sub> as solvent)

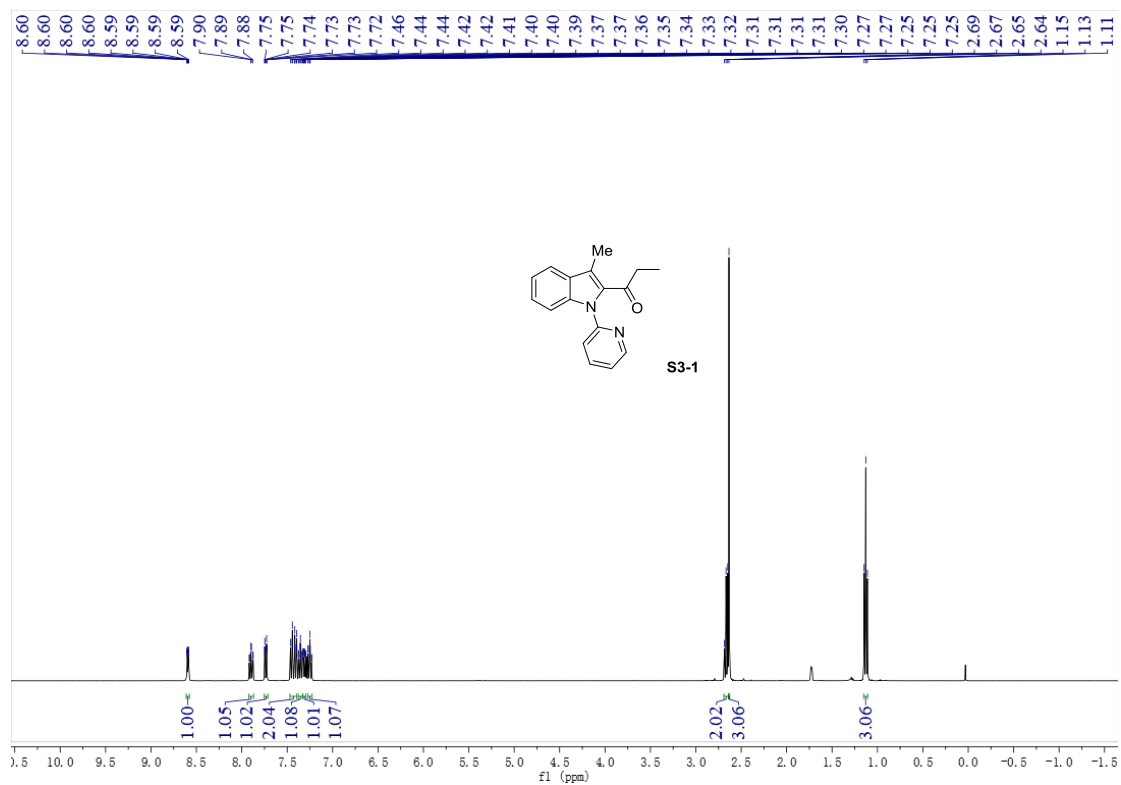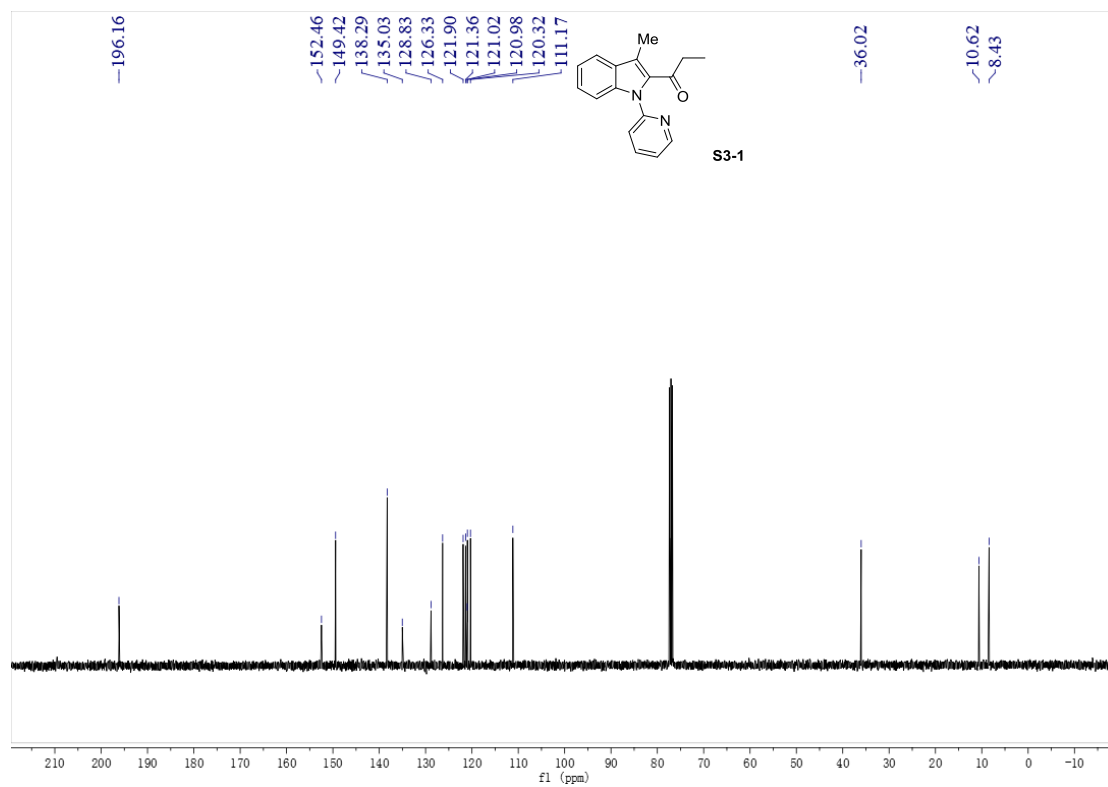



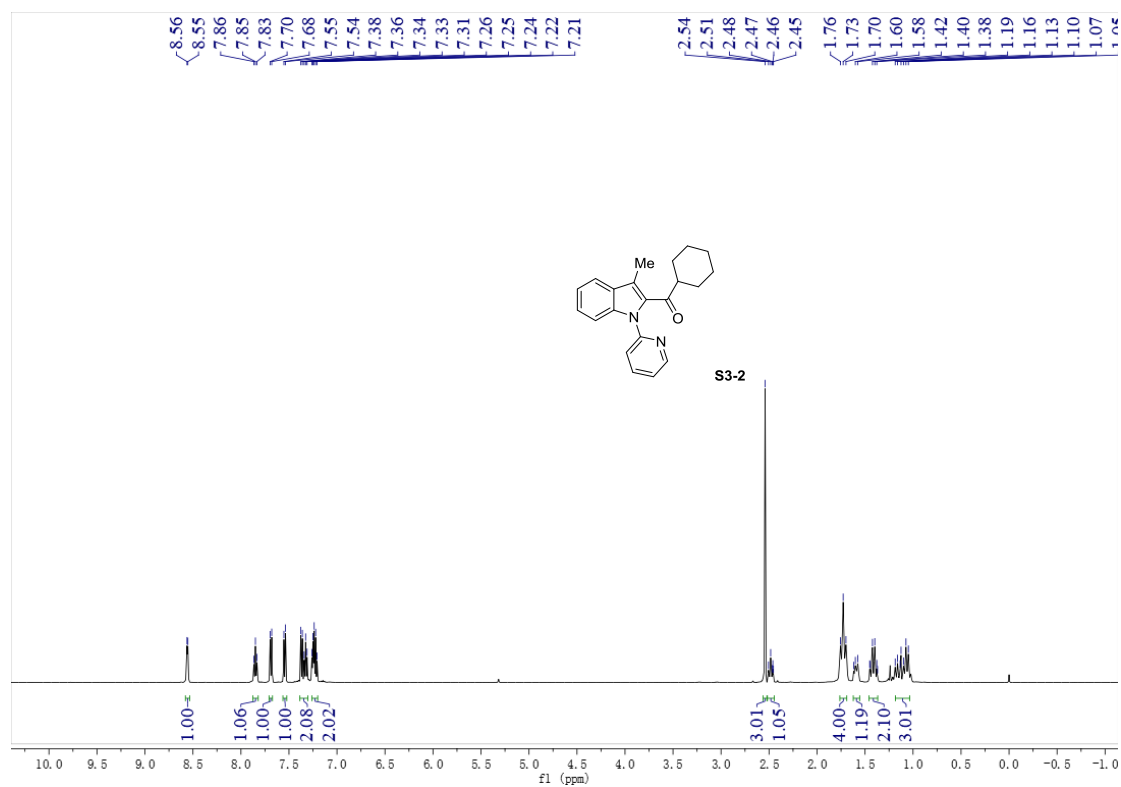

Supplementary Fig. 44 | <sup>1</sup>H NMR (400 MHz) of compound S3-2 (using CDCl<sub>3</sub> as solvent)

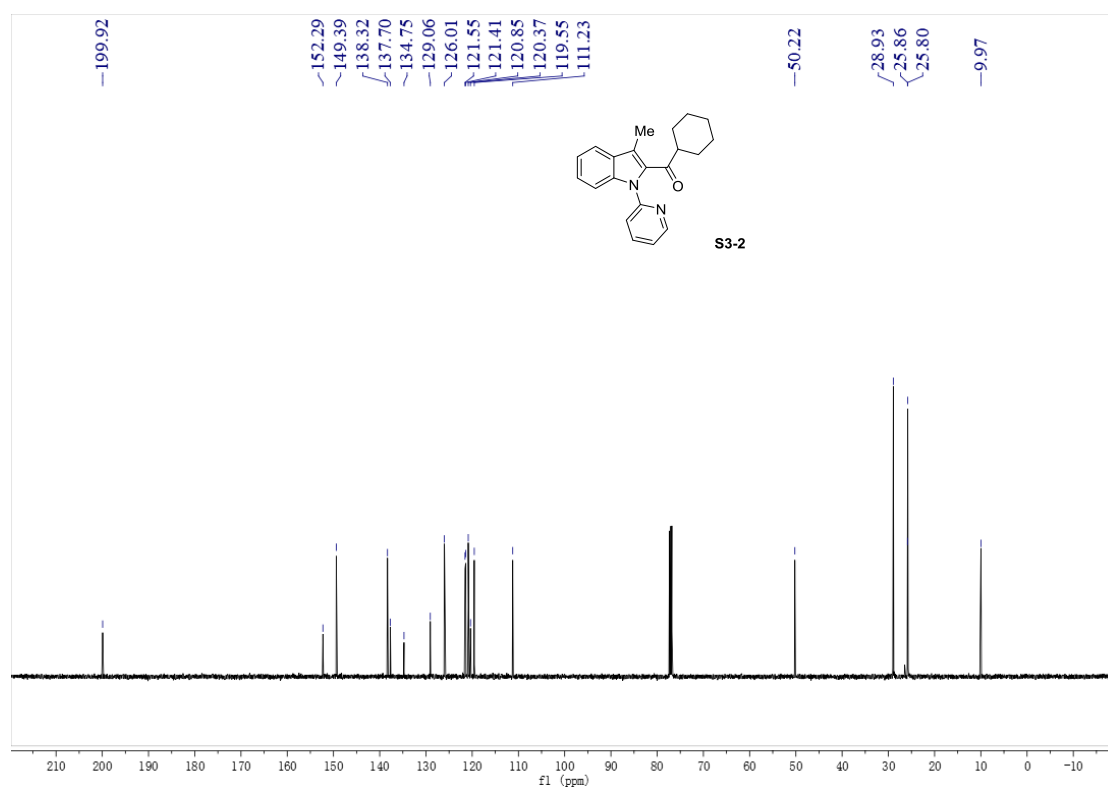

Supplementary Fig. 45 | <sup>13</sup>C NMR (101 MHz) of compound S3-2 (using CDCl<sub>3</sub> as solvent)

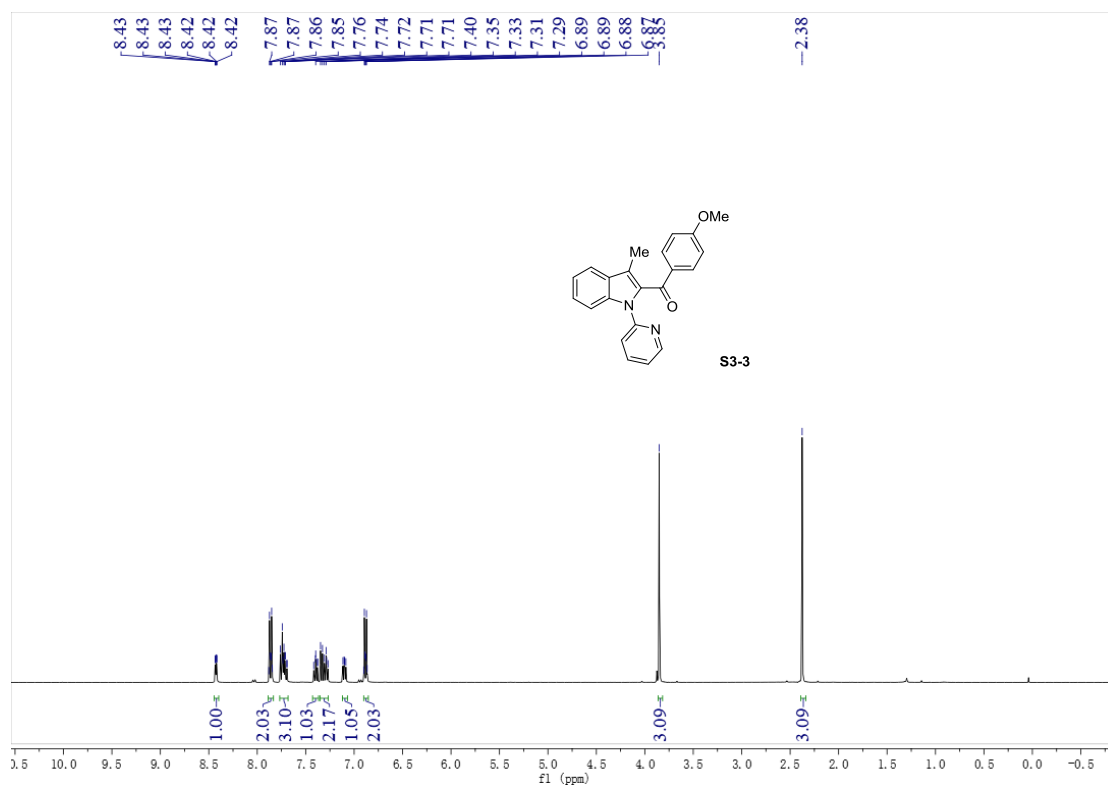

Supplementary Fig. 46 | <sup>1</sup>H NMR (400 MHz) of compound S3-3 (using CDCl<sub>3</sub> as solvent)

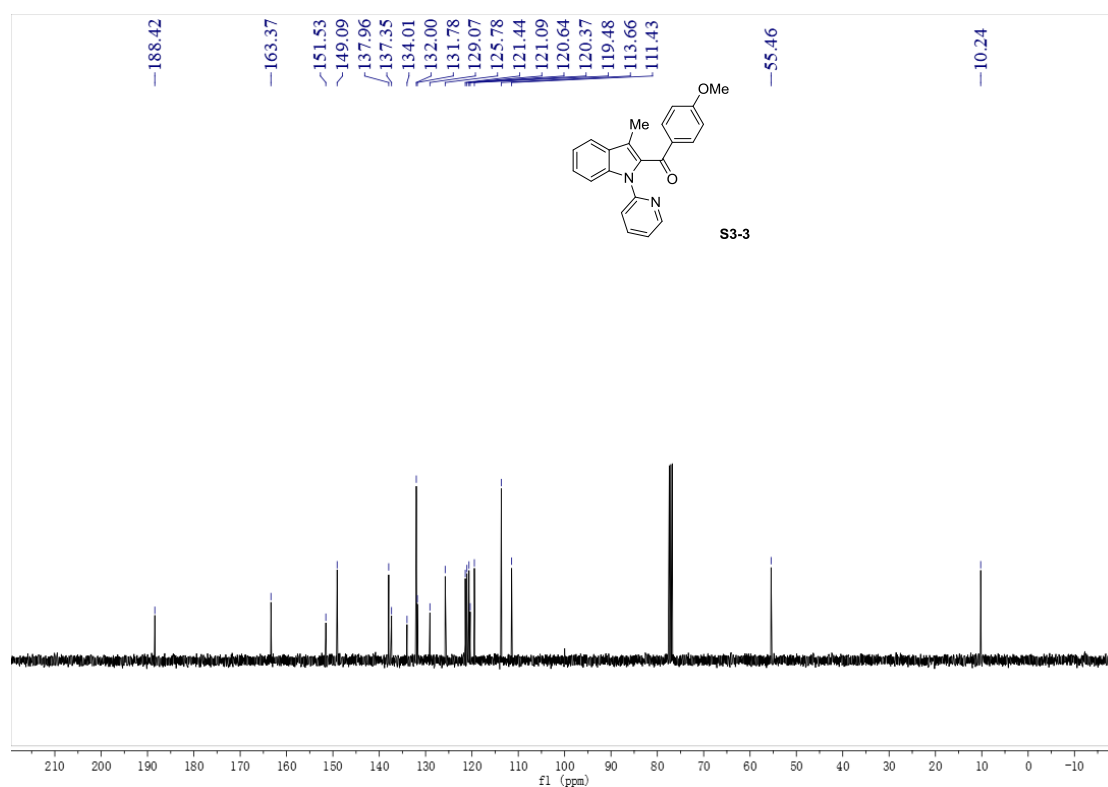

Supplementary Fig. 47 | <sup>13</sup>C NMR (101 MHz) of compound S3-3 (using CDCl<sub>3</sub> as solvent)

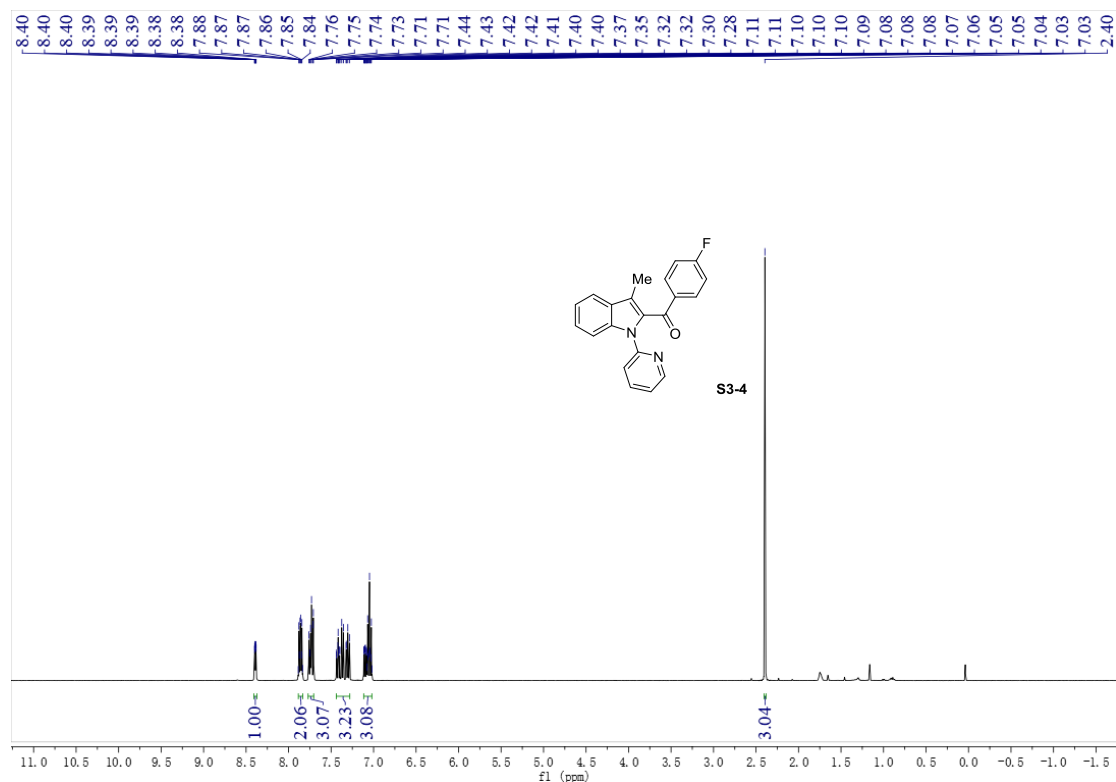

Supplementary Fig. 48 | <sup>1</sup>H NMR (400 MHz) of compound S3-4 (using CDCl<sub>3</sub> as solvent)

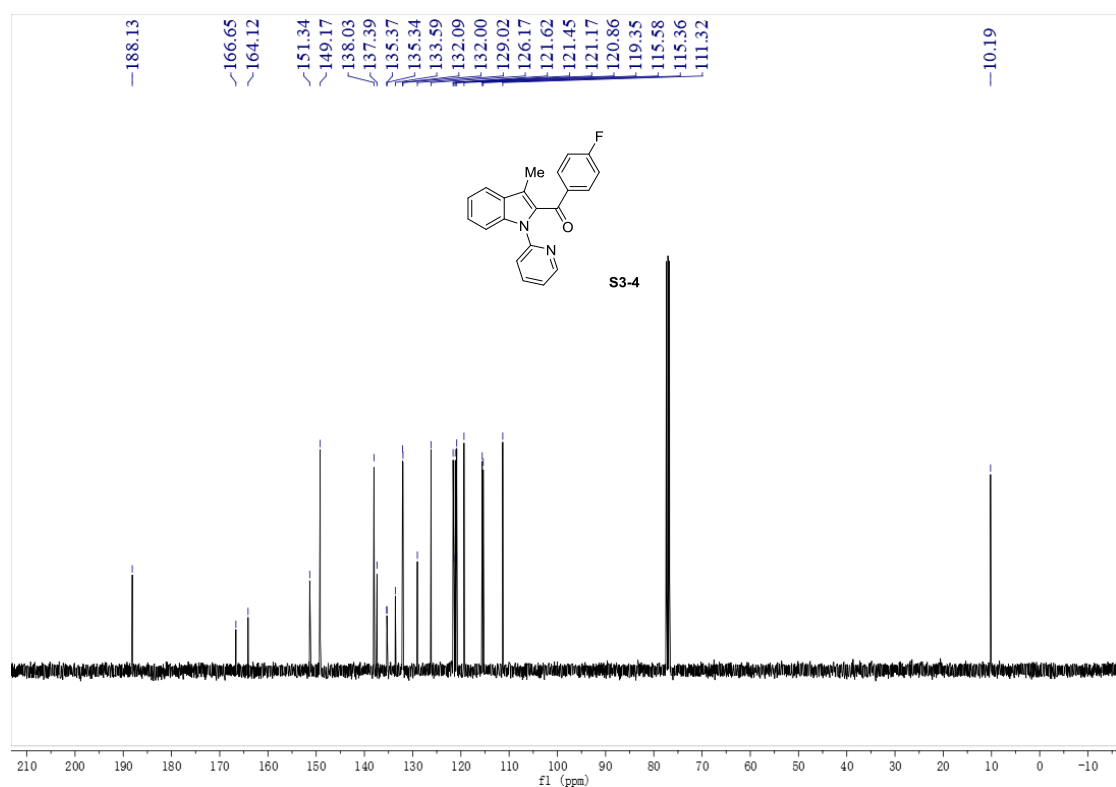

Supplementary Fig. 49 | <sup>13</sup>C NMR (101 MHz) of compound S3-4 (using CDCl<sub>3</sub> as solvent)

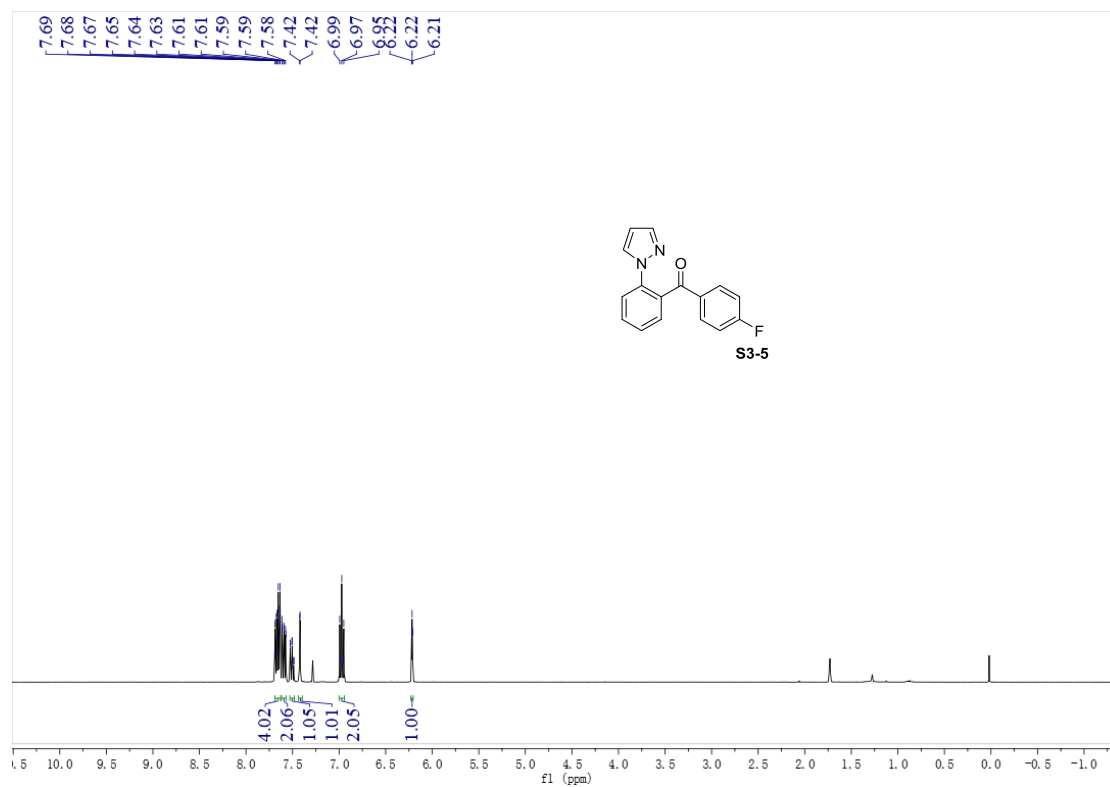

Supplementary Fig. 50 | <sup>1</sup>H NMR (400 MHz) of compound S3-5 (using CDCl<sub>3</sub> as solvent)

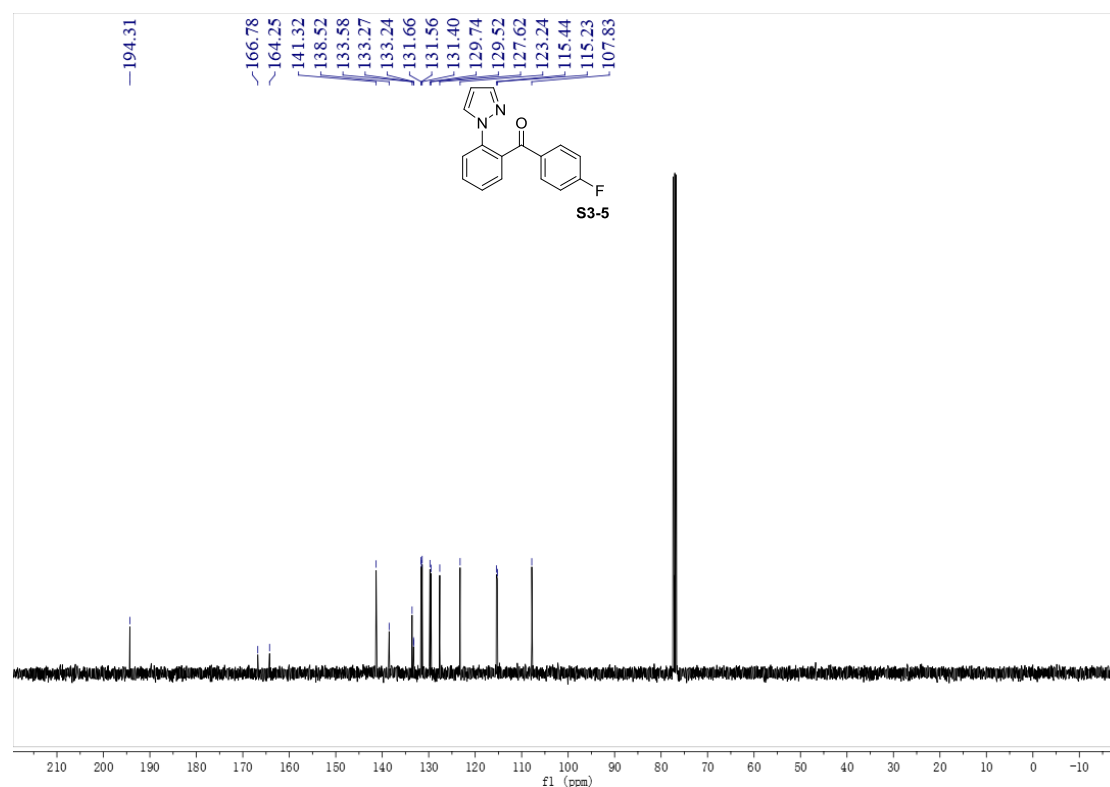

Supplementary Fig. 51 | <sup>13</sup>C NMR (101 MHz) of compound S3-5 (using CDCl<sub>3</sub> as solvent)

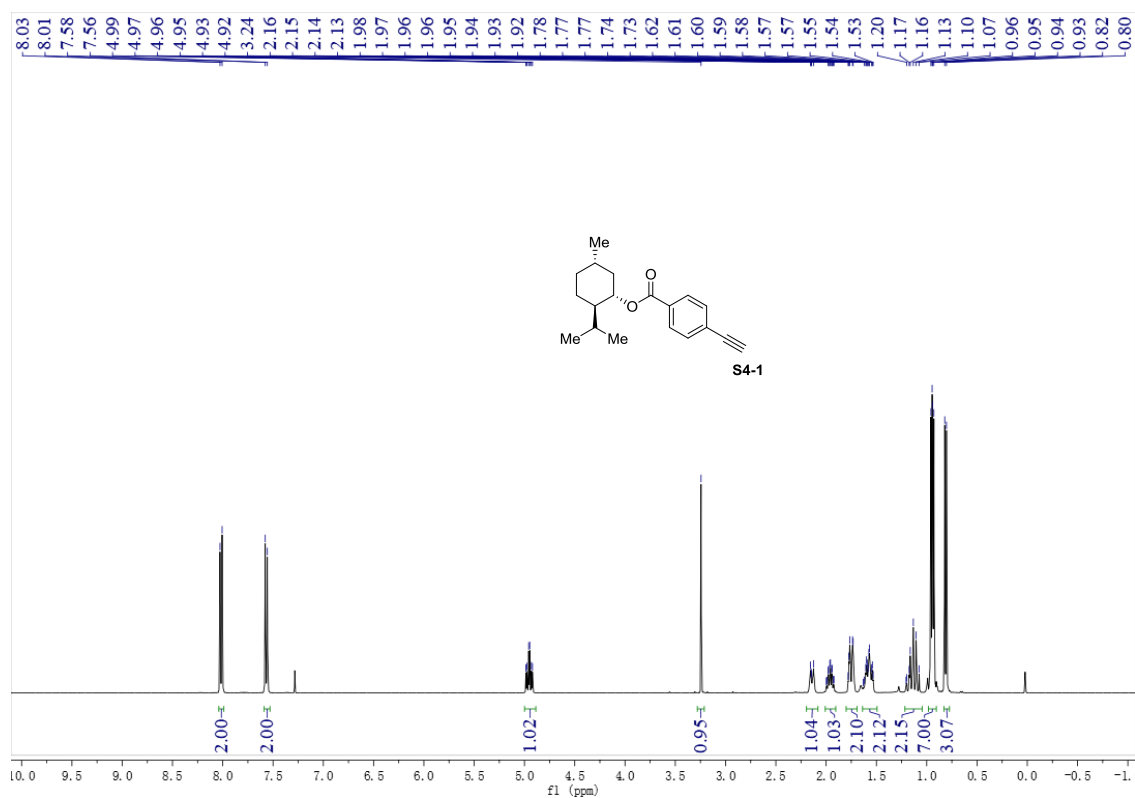

Supplementary Fig. 52 | <sup>1</sup>H NMR (400 MHz) of compound S4-1 (using CDCl<sub>3</sub> as solvent)

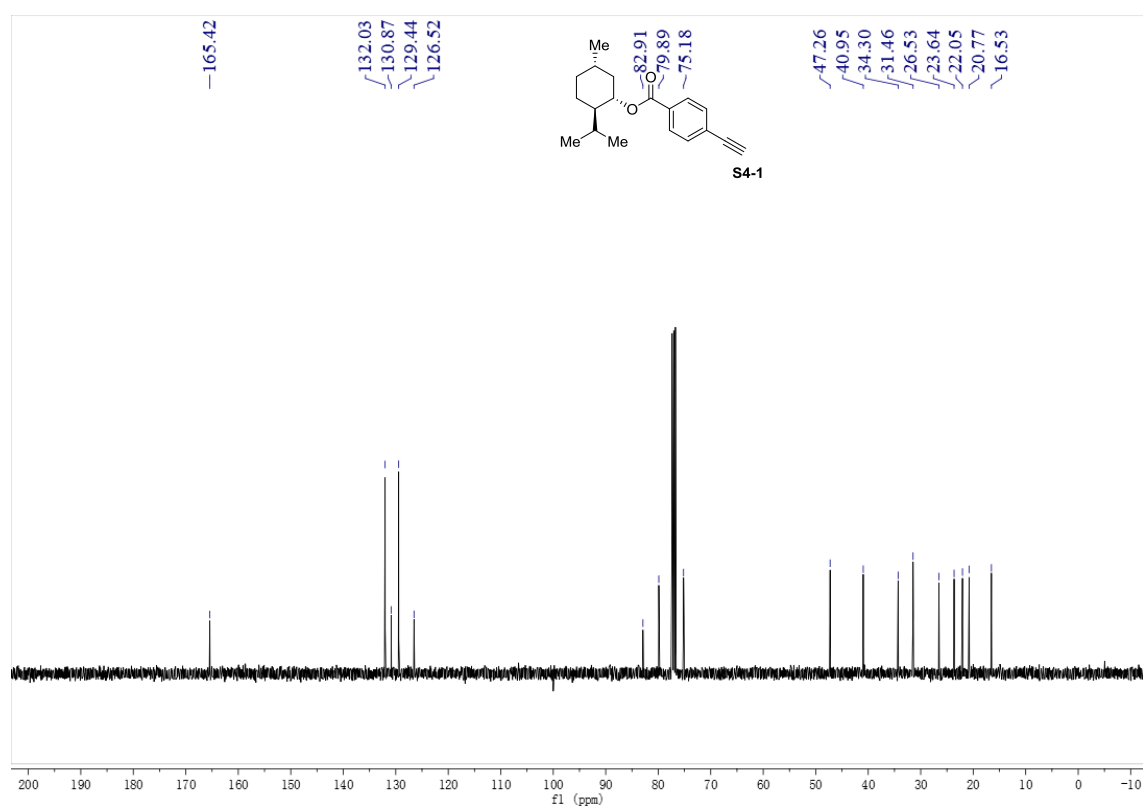

Supplementary Fig. 53 | <sup>13</sup>C NMR (101 MHz) of compound S4-1 (using CDCl<sub>3</sub> as solvent)

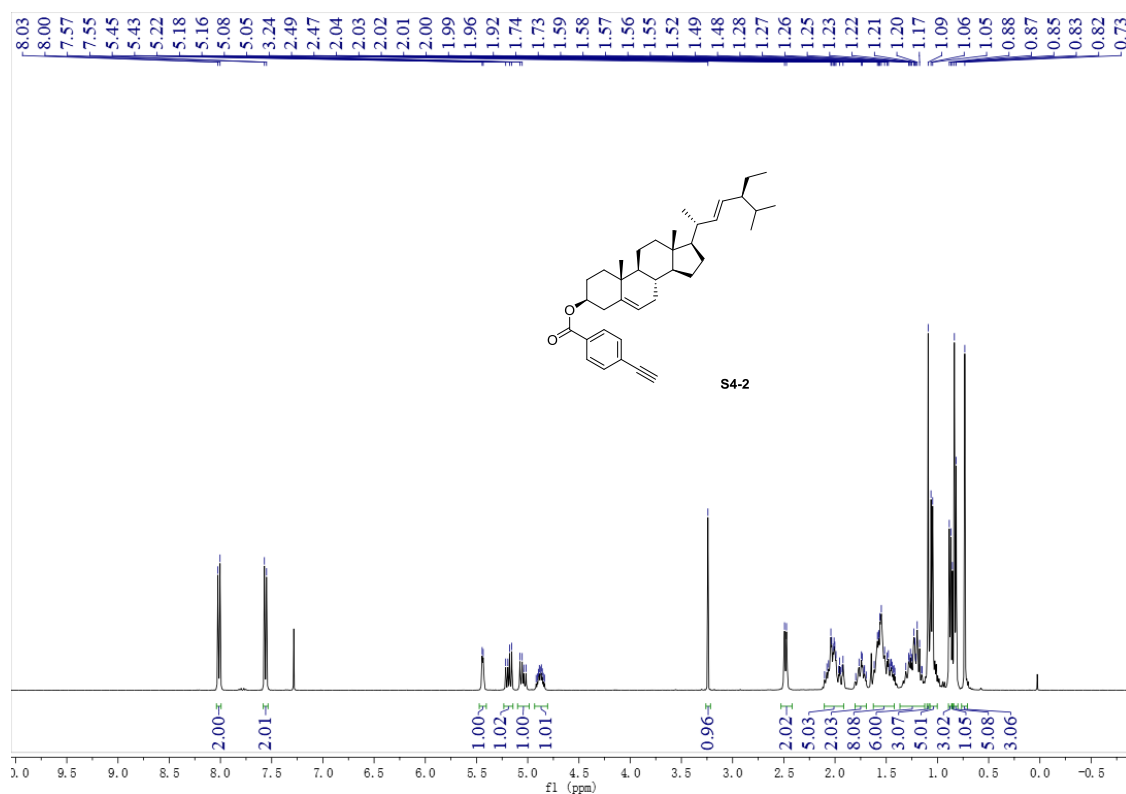

Supplementary Fig. 54 |  $^1\text{H}$  NMR (400 MHz) of compound S4-2 (using  $\text{CDCl}_3$  as solvent)

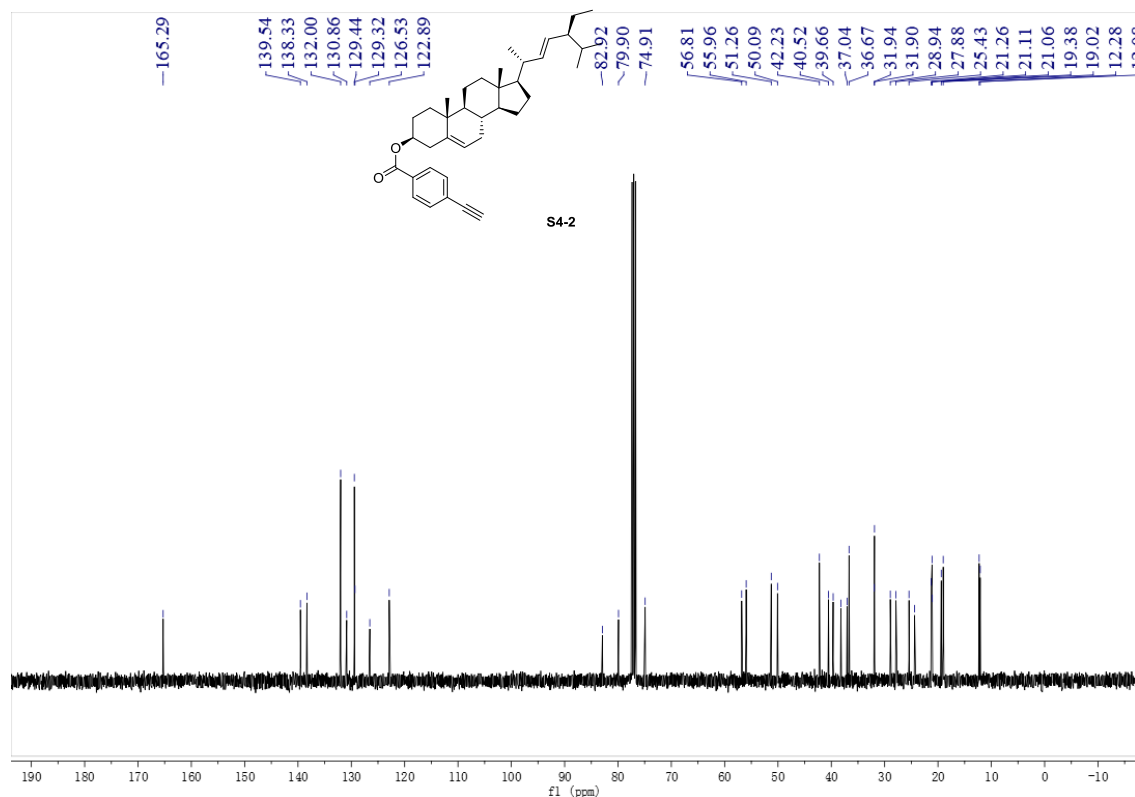

Supplementary Fig. 55 |  $^{13}\text{C}$  NMR (101 MHz) of compound S4-2 (using  $\text{CDCl}_3$  as solvent)

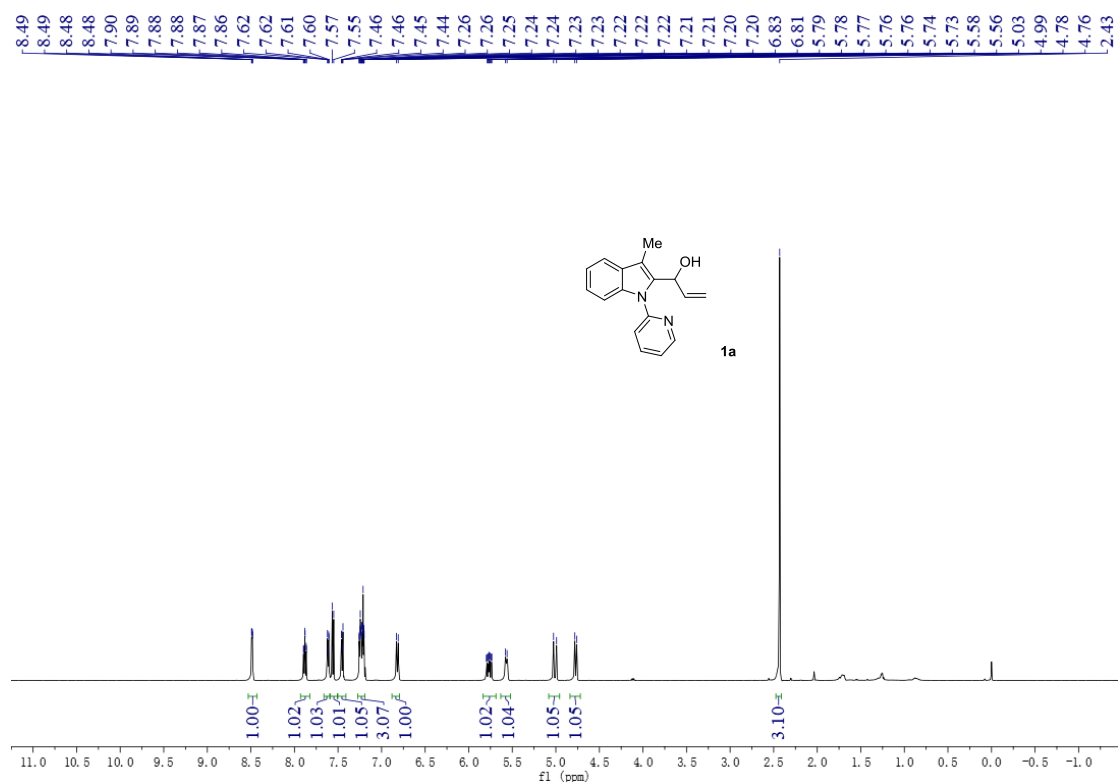

**Supplementary Fig. 56 | <sup>1</sup>H NMR (500 MHz) of compound 1a (using CDCl<sub>3</sub> as solvent)**

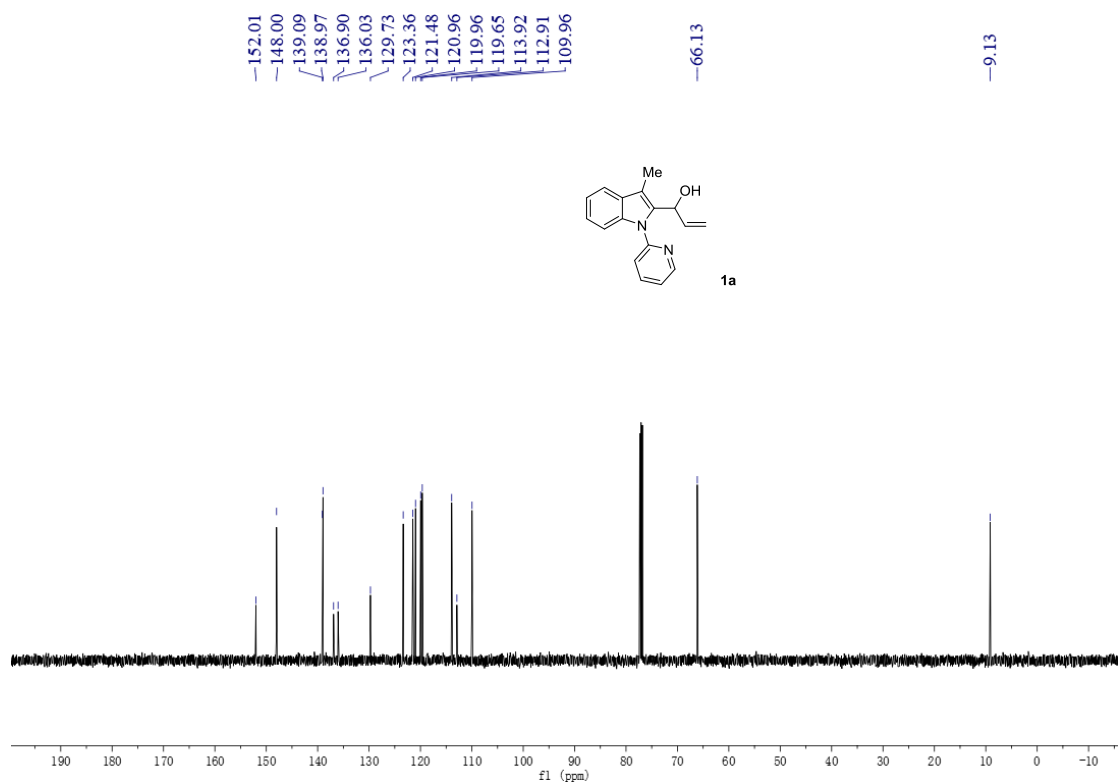

**Supplementary Fig. 57 | <sup>13</sup>C NMR (126 MHz) of compound 1a (using CDCl<sub>3</sub> as solvent)**

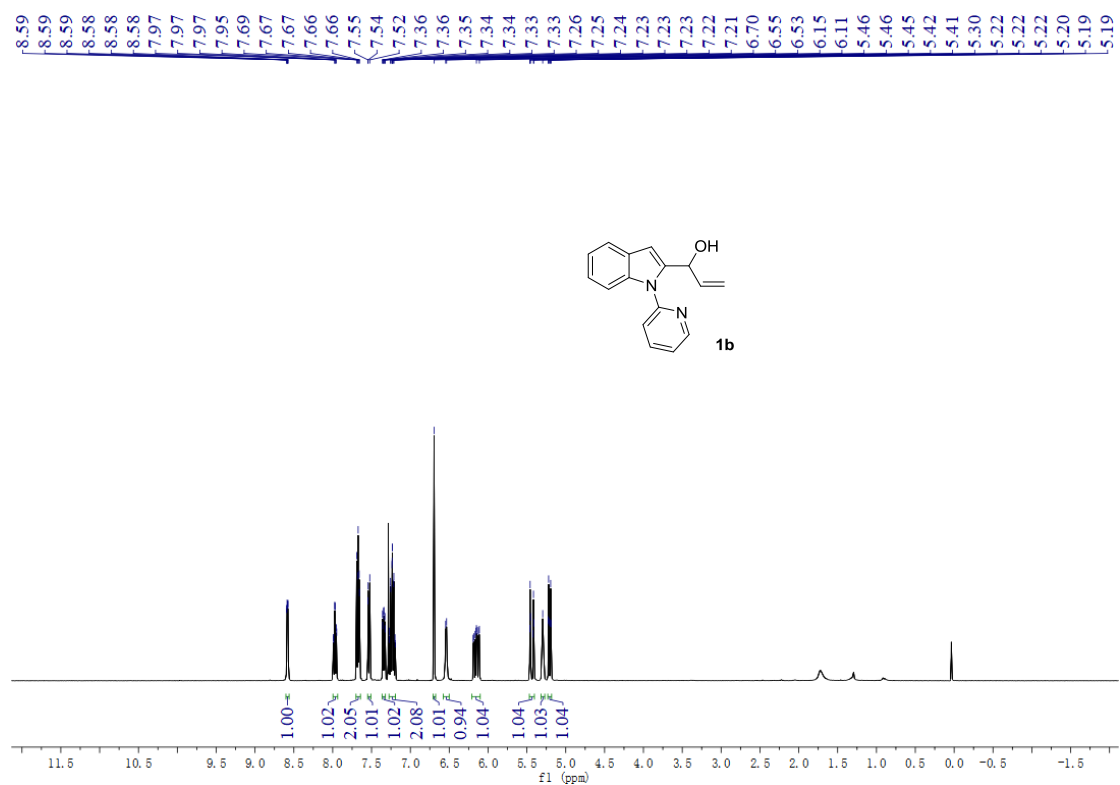

Supplementary Fig. 58 | <sup>1</sup>H NMR (400 MHz) of compound 1b (using CDCl<sub>3</sub> as solvent)

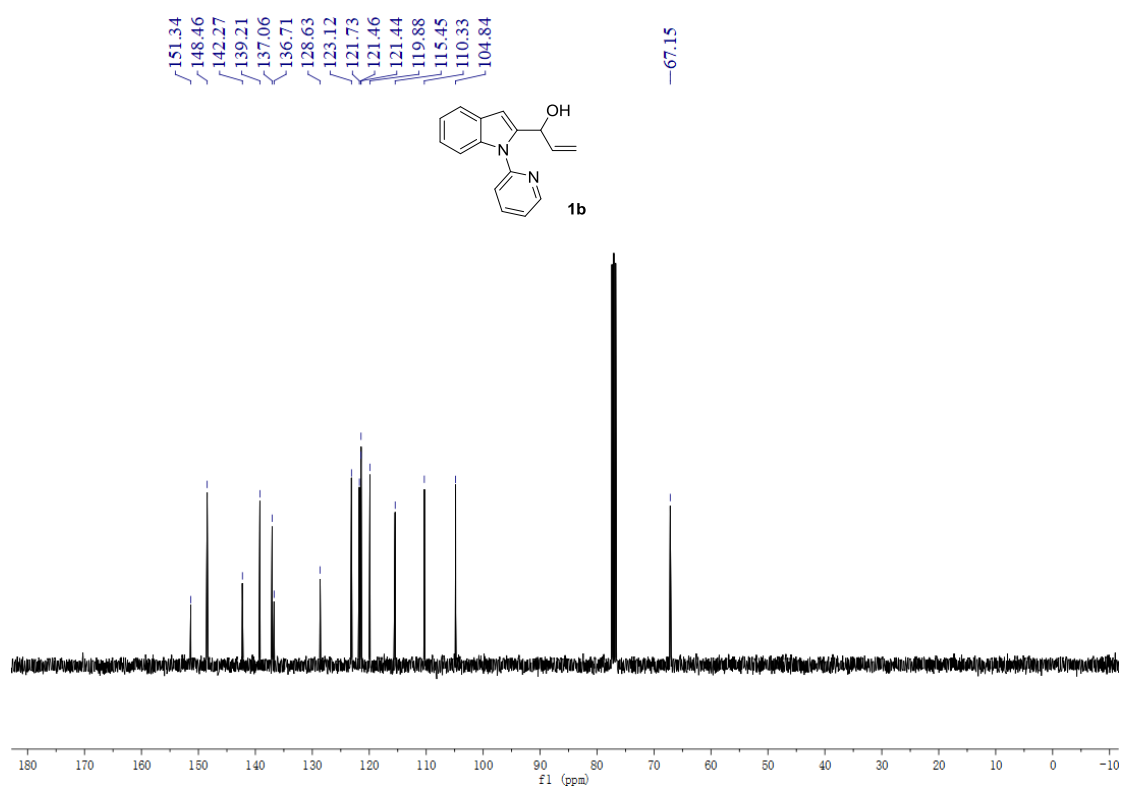

Supplementary Fig. 59 | <sup>13</sup>C NMR (101 MHz) of compound 1b (using CDCl<sub>3</sub> as solvent)



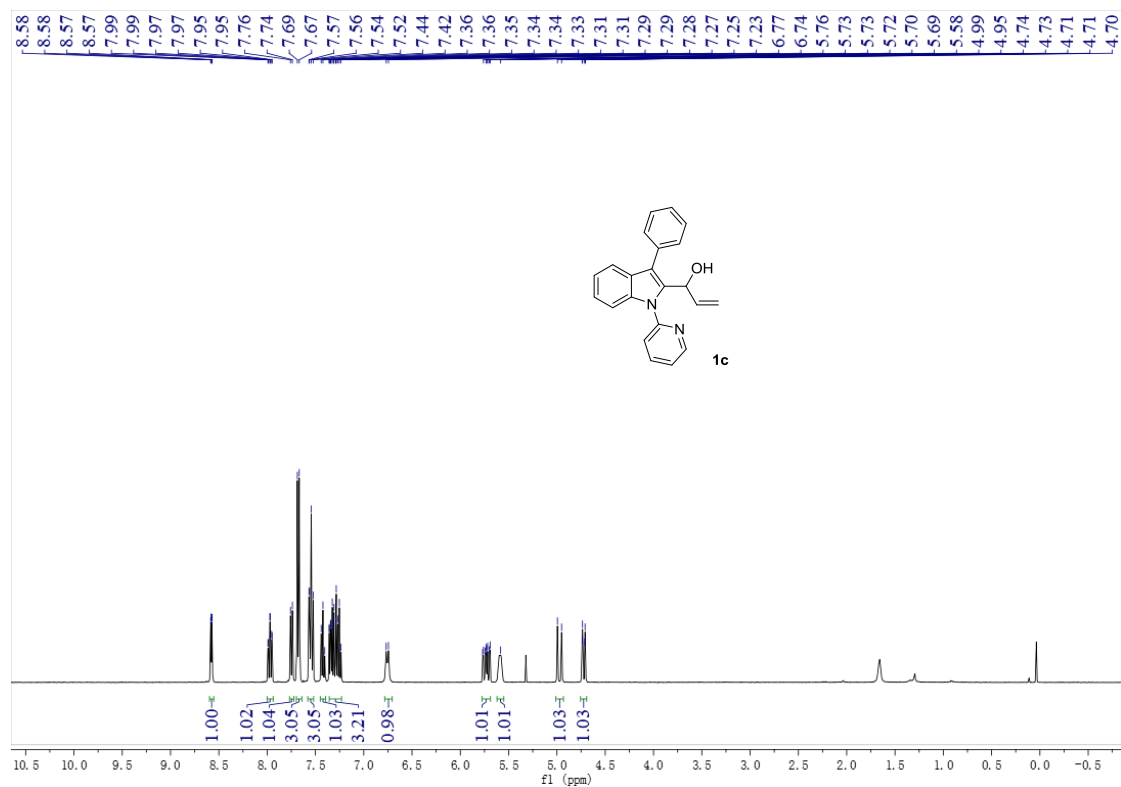

**Supplementary Fig. 60 | <sup>1</sup>H NMR (400 MHz) of compound 1c (using CDCl<sub>3</sub> as solvent)**

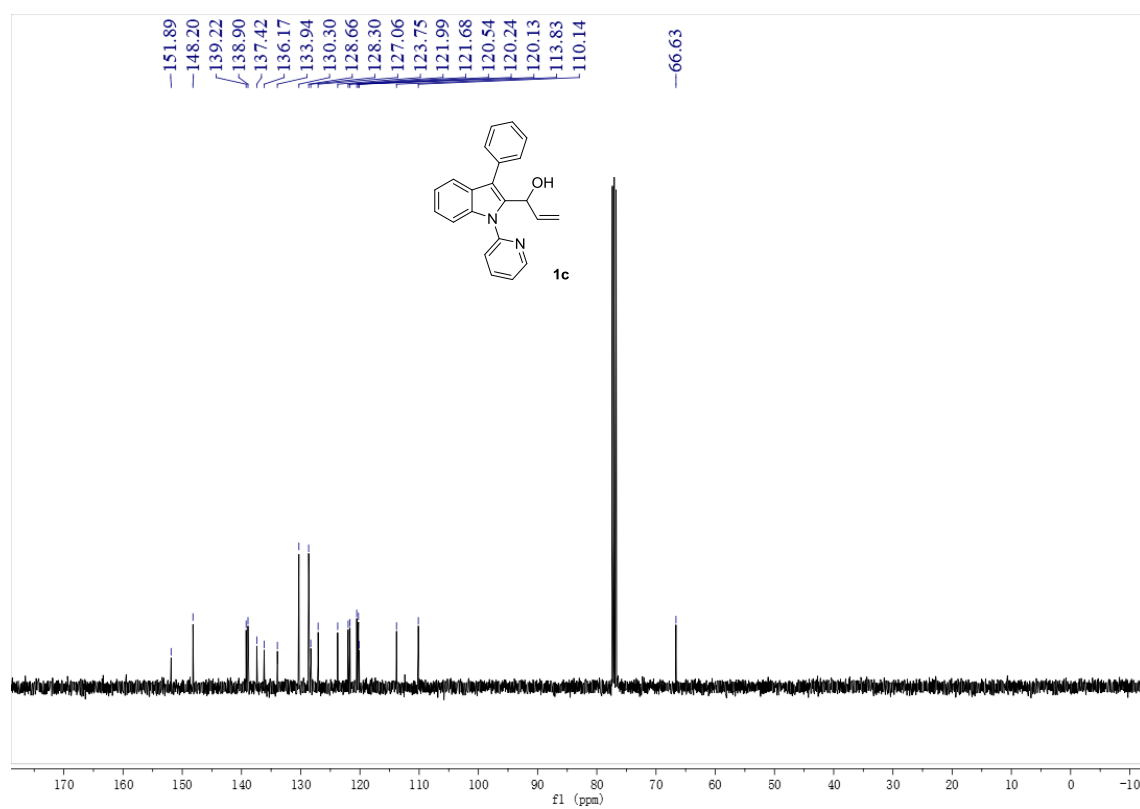

**Supplementary Fig. 61 | <sup>13</sup>C NMR (101 MHz) of compound 1c (using CDCl<sub>3</sub> as solvent)**

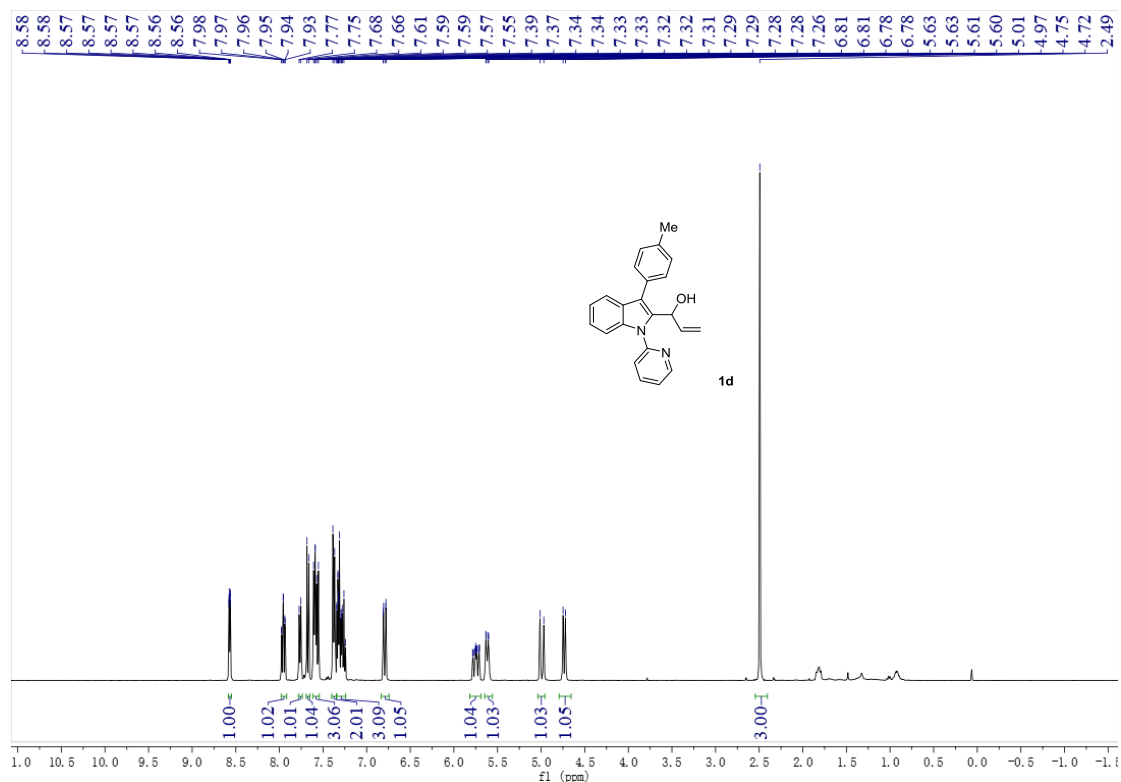

Supplementary Fig. 62 | <sup>1</sup>H NMR (500 MHz) of compound 1d (using CDCl<sub>3</sub> as solvent)

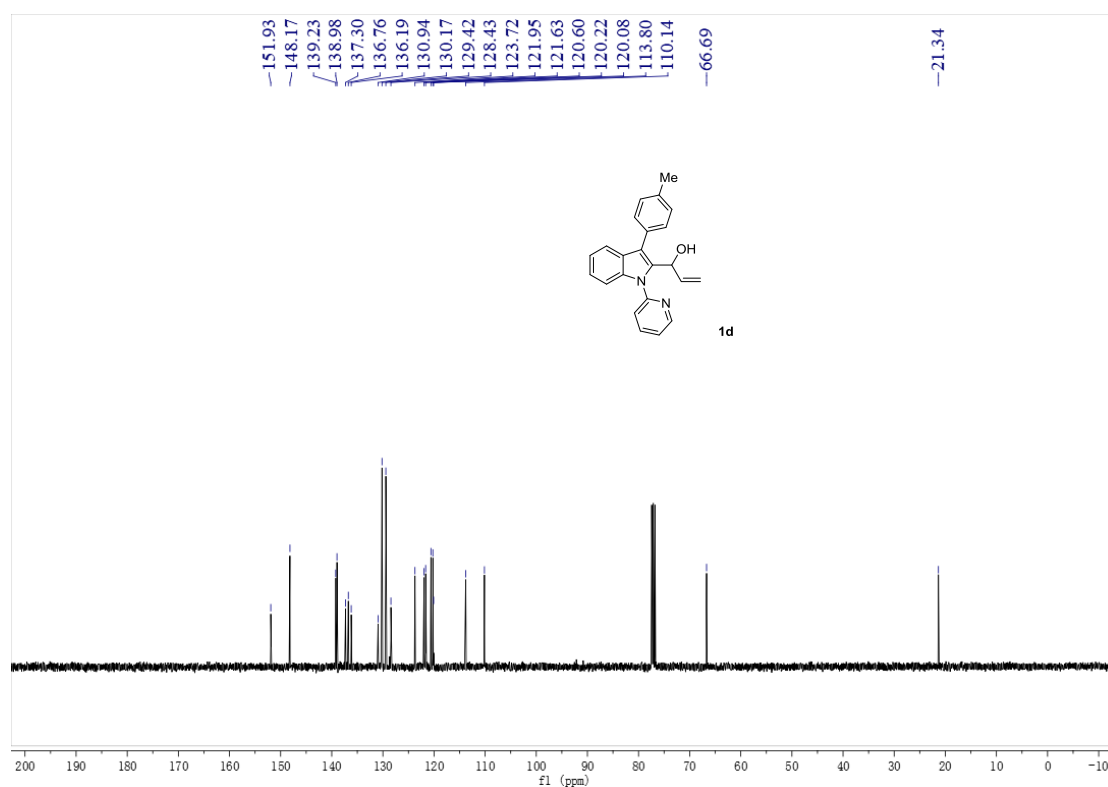

Supplementary Fig. 63 | <sup>13</sup>C NMR (126 MHz) of compound 1d (using CDCl<sub>3</sub> as solvent)

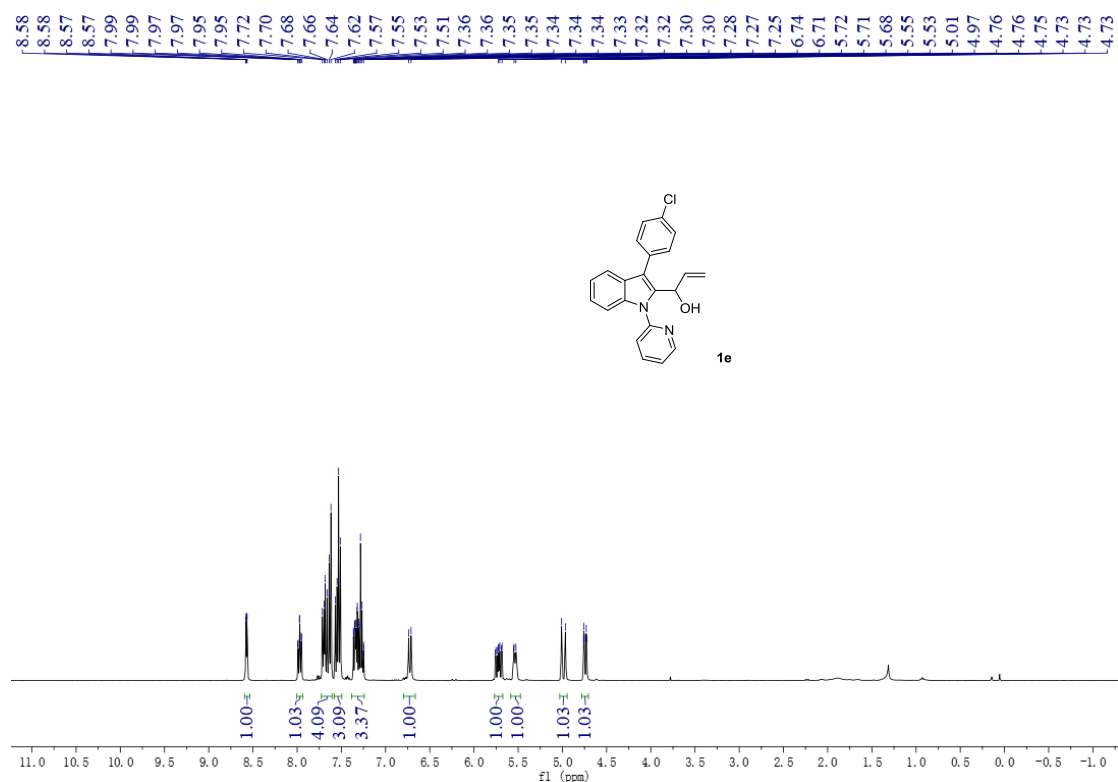

**Supplementary Fig. 64 | <sup>1</sup>H NMR (400 MHz) of compound 1e (using CDCl<sub>3</sub> as solvent)**

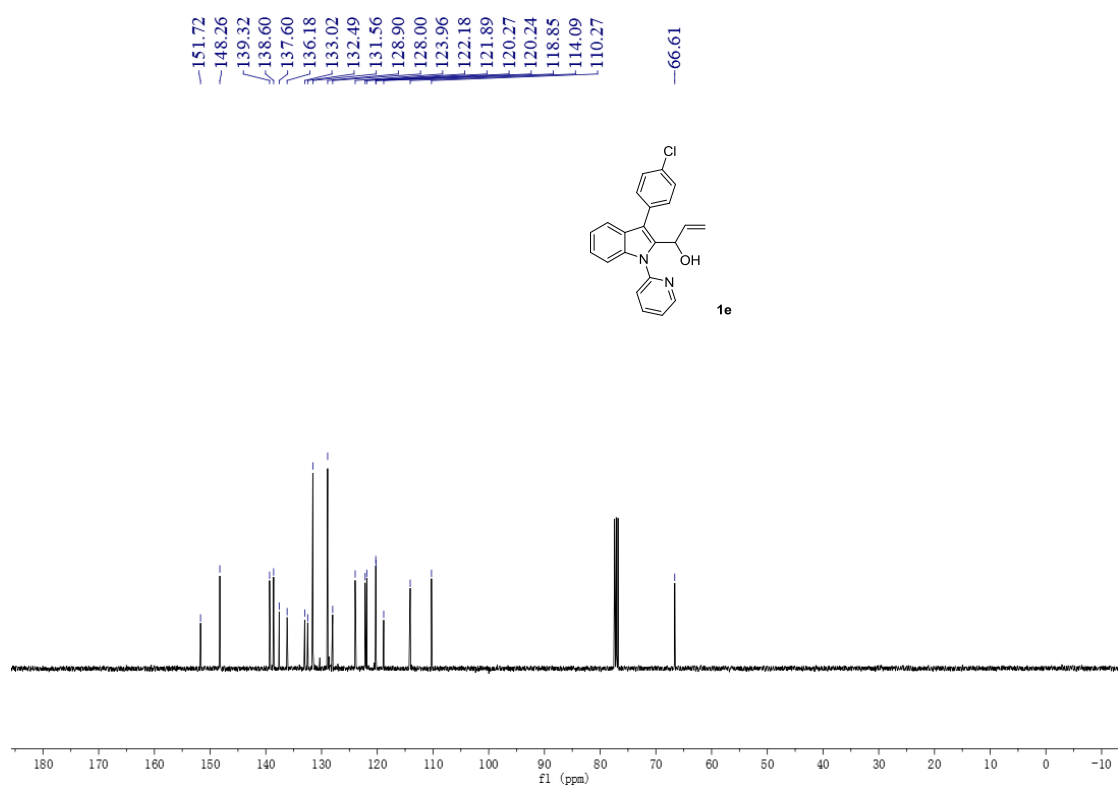

**Supplementary Fig. 65 | <sup>13</sup>C NMR (101 MHz) of compound 1e (using CDCl<sub>3</sub> as solvent)**

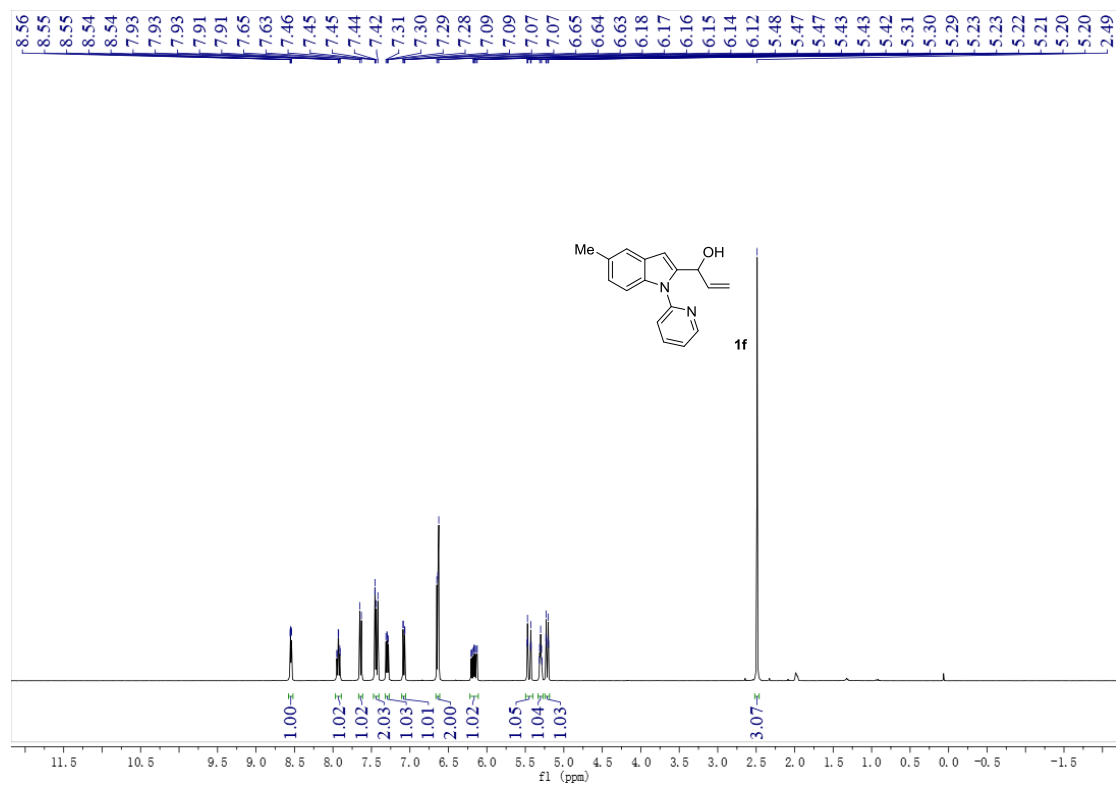

Supplementary Fig. 66 | <sup>1</sup>H NMR (400 MHz) of compound 1f (using CDCl<sub>3</sub> as solvent)

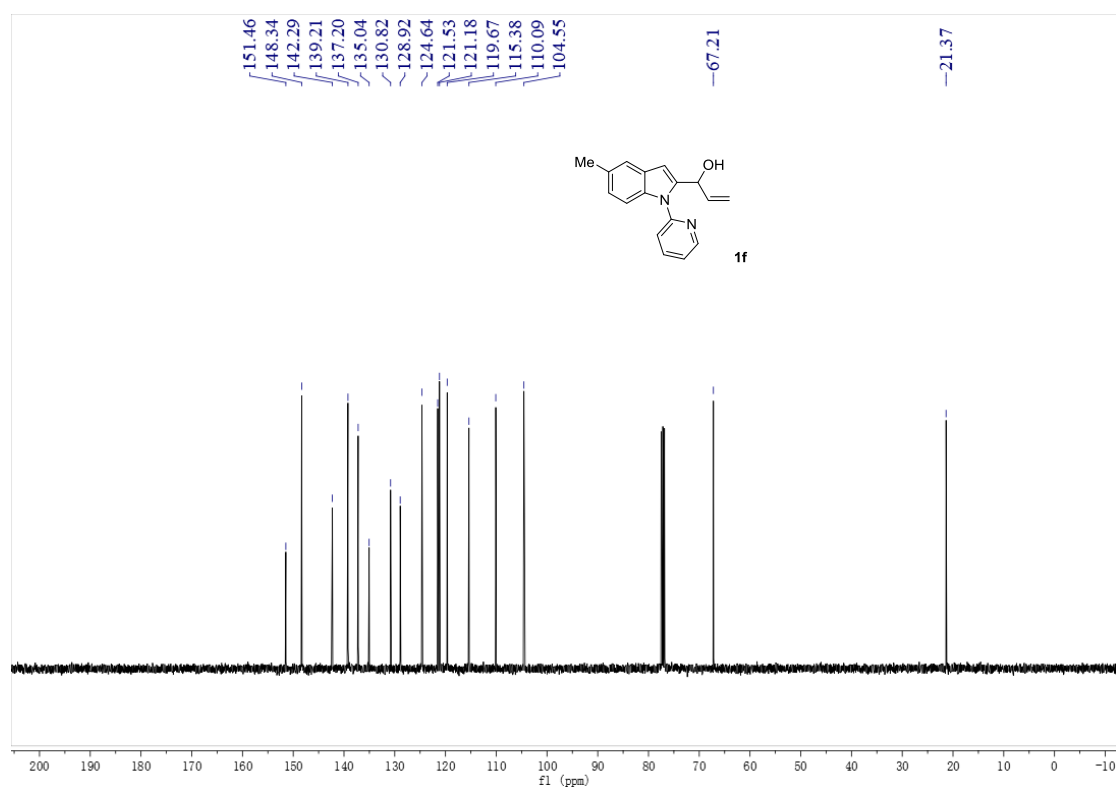

Supplementary Fig. 67 | <sup>13</sup>C NMR (101 MHz) of compound 1f (using CDCl<sub>3</sub> as solvent)

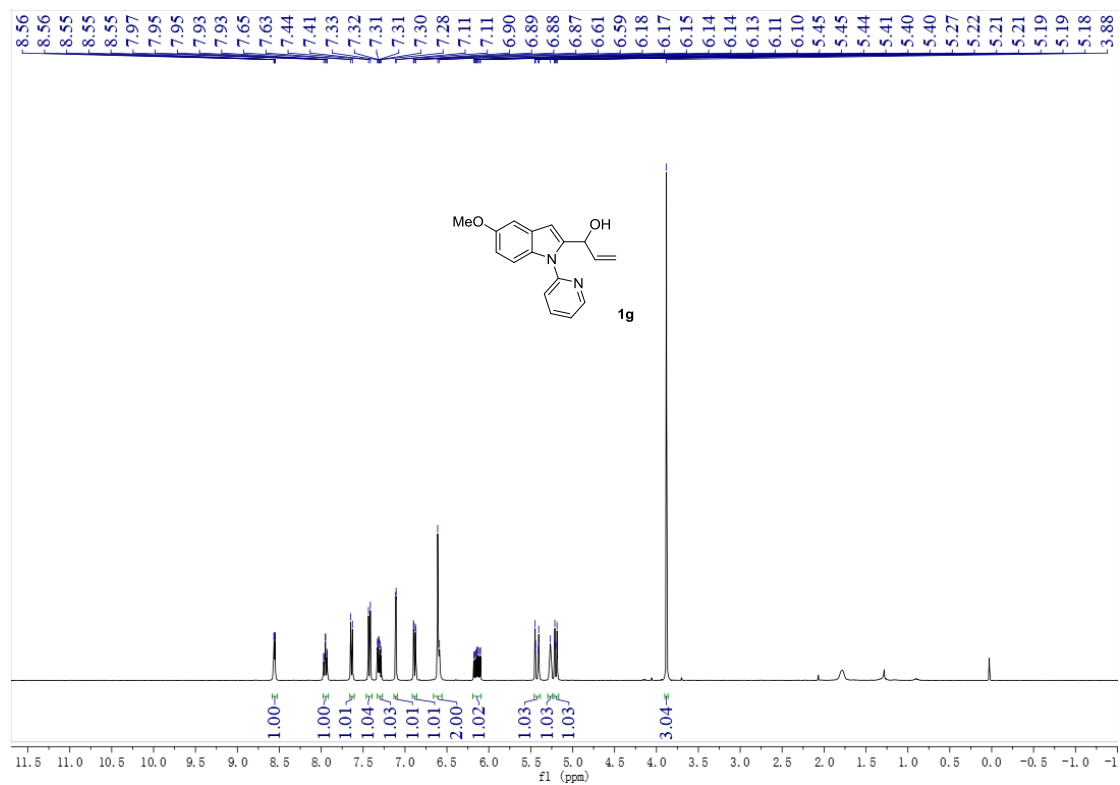

Supplementary Fig. 68 | <sup>1</sup>H NMR (400 MHz) of compound 1g (using CDCl<sub>3</sub> as solvent)

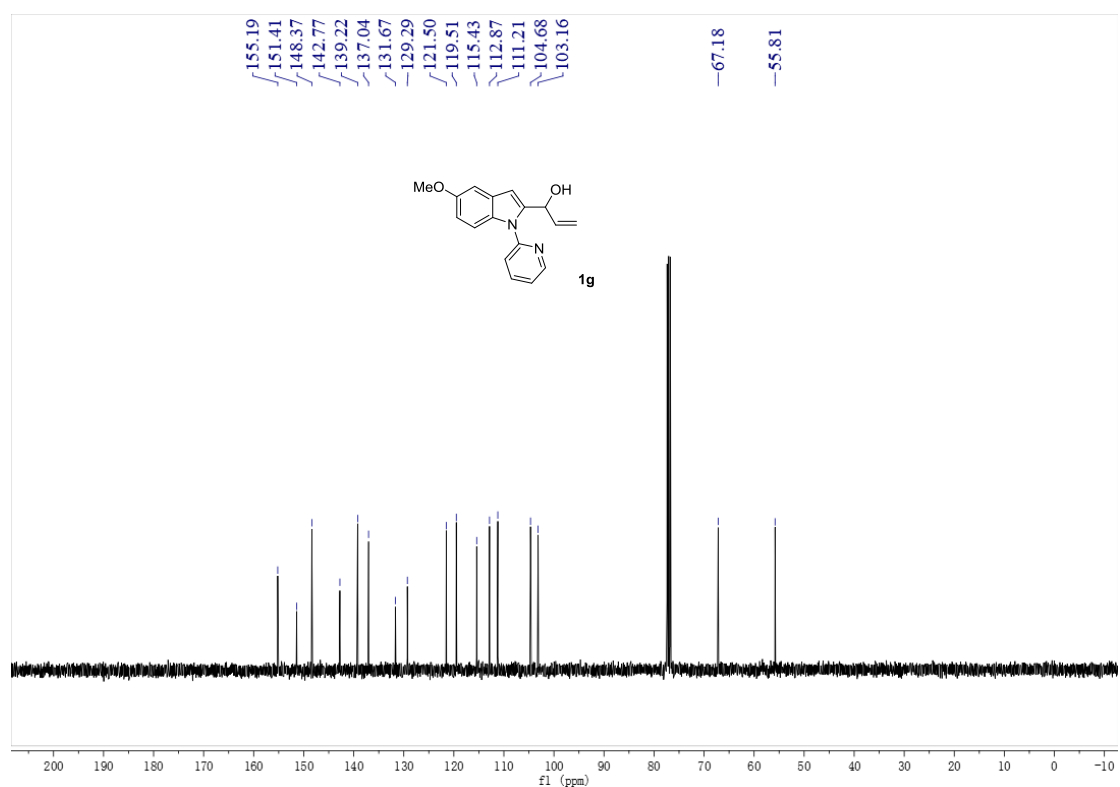

Supplementary Fig. 69 | <sup>13</sup>C NMR (101 MHz) of compound 1g (using CDCl<sub>3</sub> as solvent)

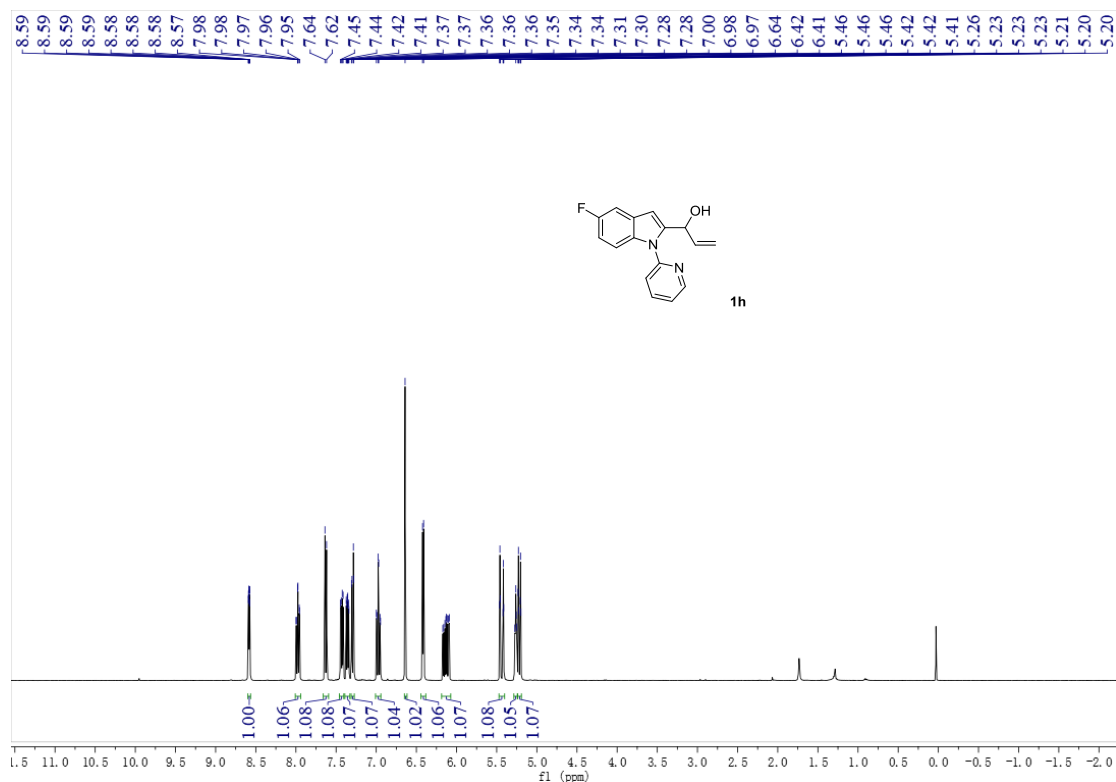

Supplementary Fig. 70 | <sup>1</sup>H NMR (400 MHz) of compound 1h (using CDCl<sub>3</sub> as solvent)

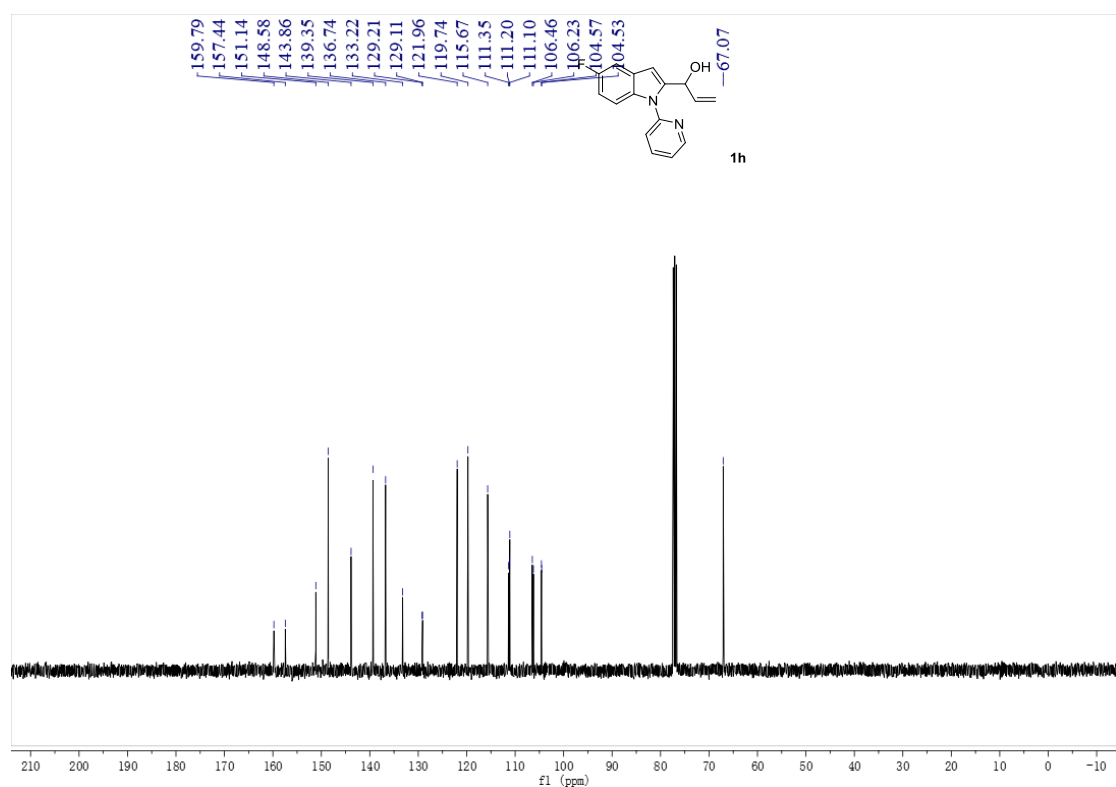

Supplementary Fig. 71 | <sup>13</sup>C NMR (101 MHz) of compound 1h (using CDCl<sub>3</sub> as solvent)

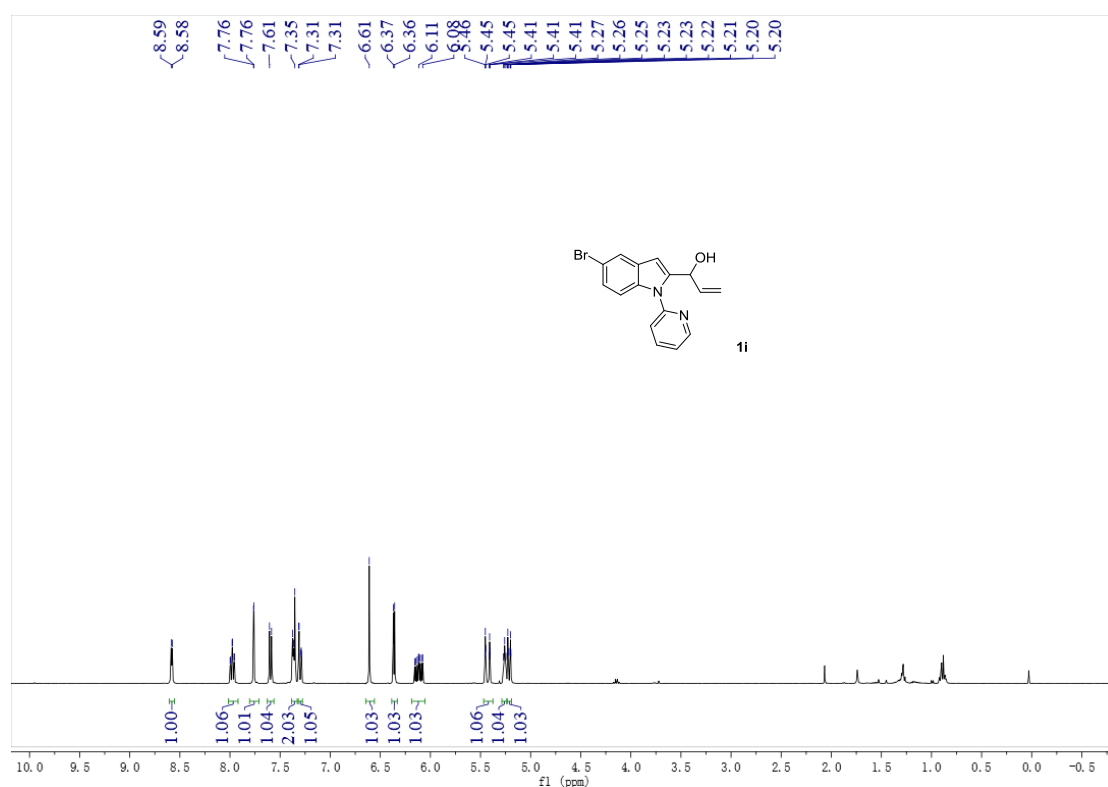

Supplementary Fig. 72 | <sup>1</sup>H NMR (400 MHz) of compound **1i** (using CDCl<sub>3</sub> as solvent)

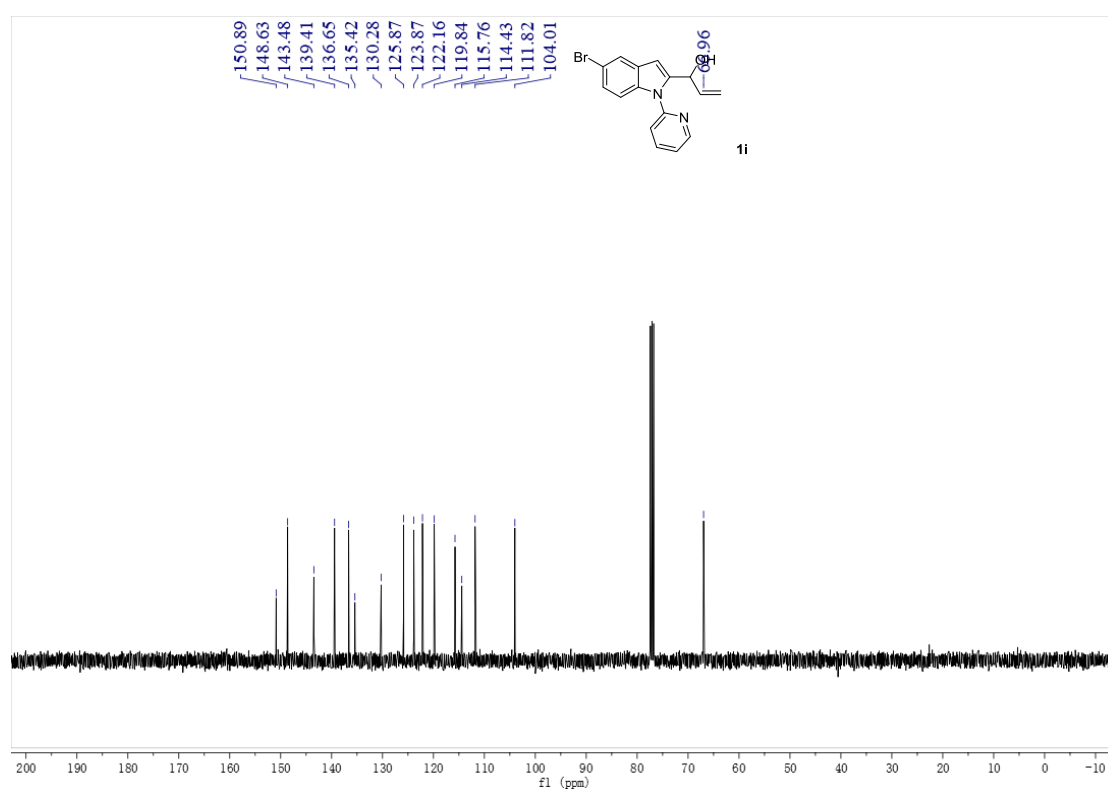

Supplementary Fig. 73 | <sup>13</sup>C NMR (101 MHz) of compound **1i** (using CDCl<sub>3</sub> as solvent)

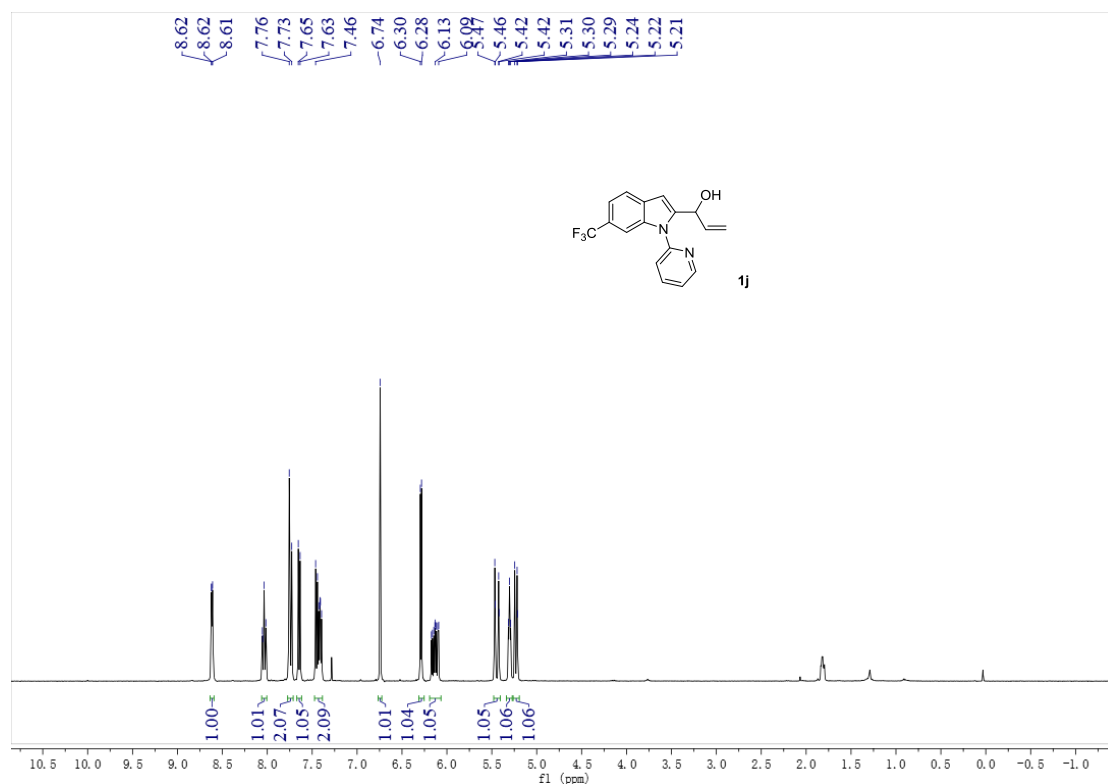

Supplementary Fig. 74 | <sup>1</sup>H NMR (400 MHz) of compound 1j (using CDCl<sub>3</sub> as solvent)

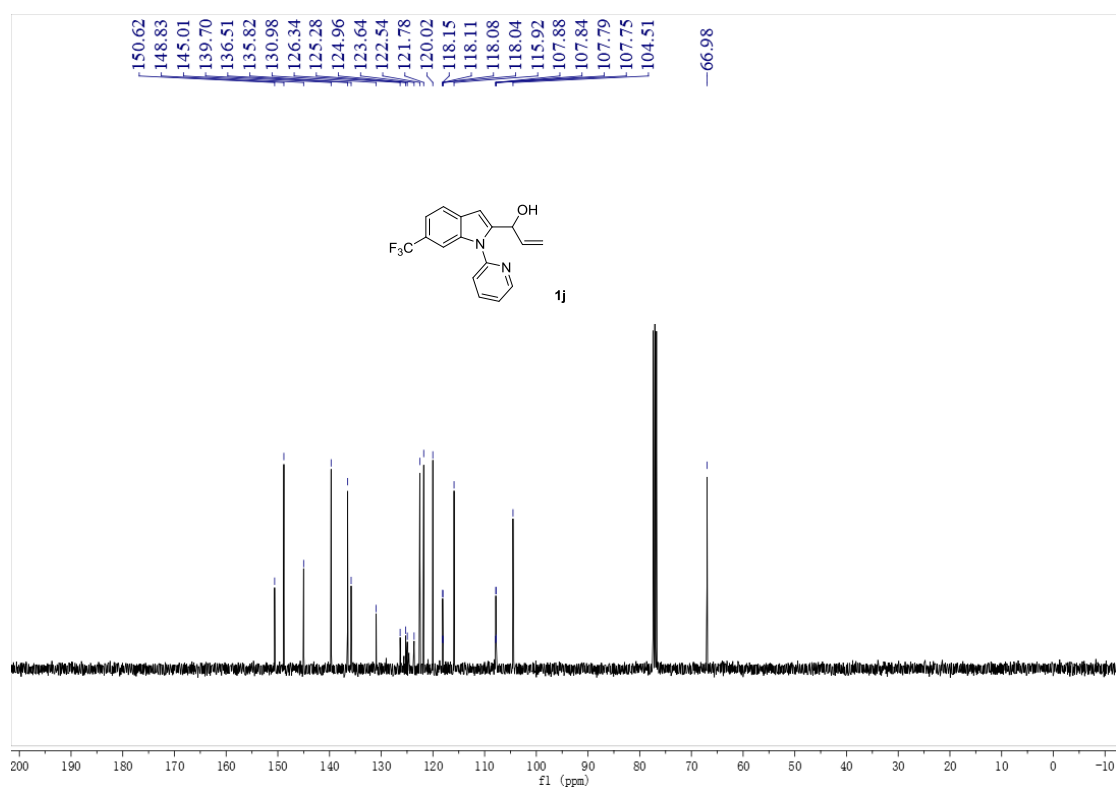

Supplementary Fig. 75 | <sup>13</sup>C NMR (101 MHz) of compound 1j (using CDCl<sub>3</sub> as solvent)



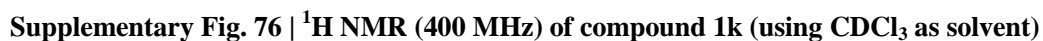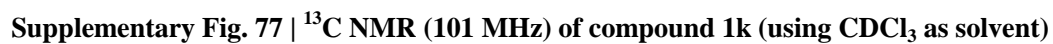

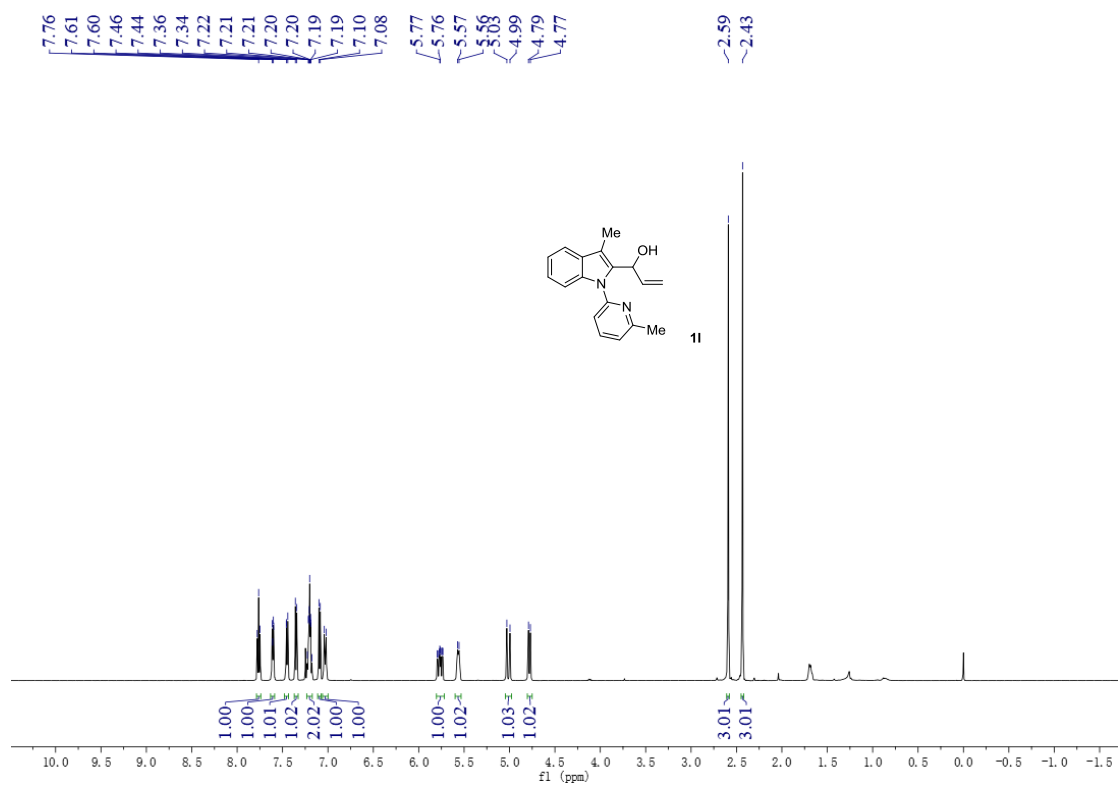

**Supplementary Fig. 78 | <sup>1</sup>H NMR (500 MHz) of compound 1l (using CDCl<sub>3</sub> as solvent)**

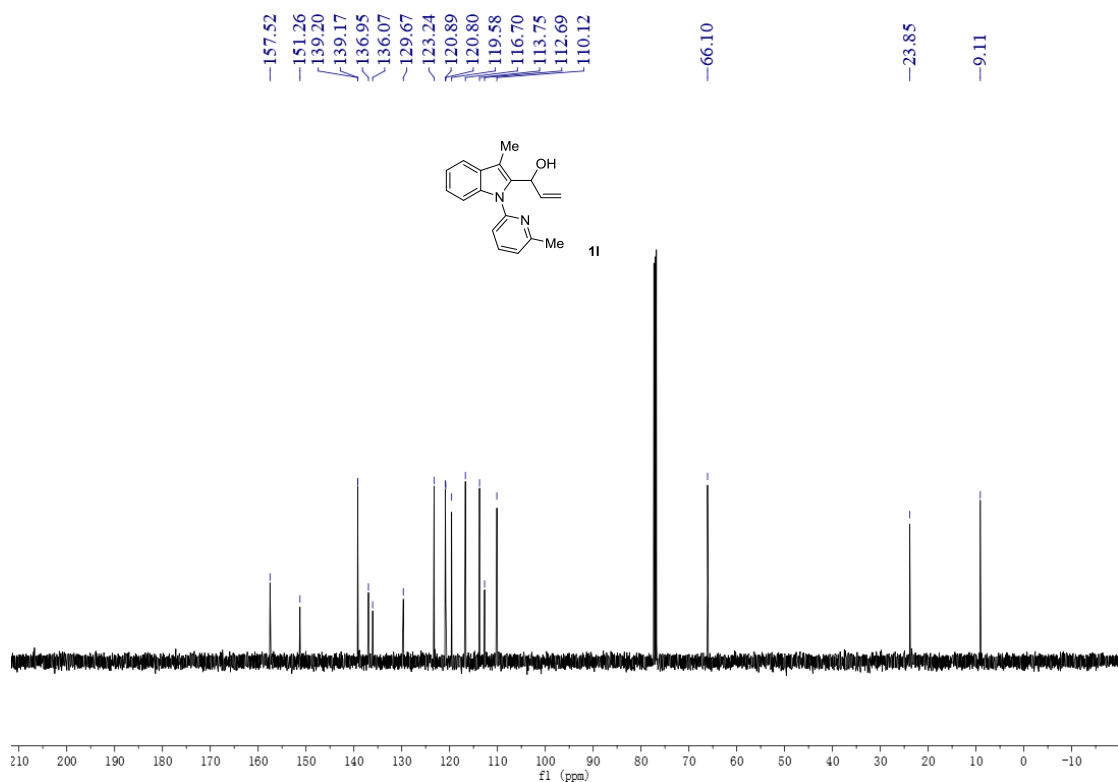

**Supplementary Fig. 79 | <sup>13</sup>C NMR (126 MHz) of compound 1l (using CDCl<sub>3</sub> as solvent)**

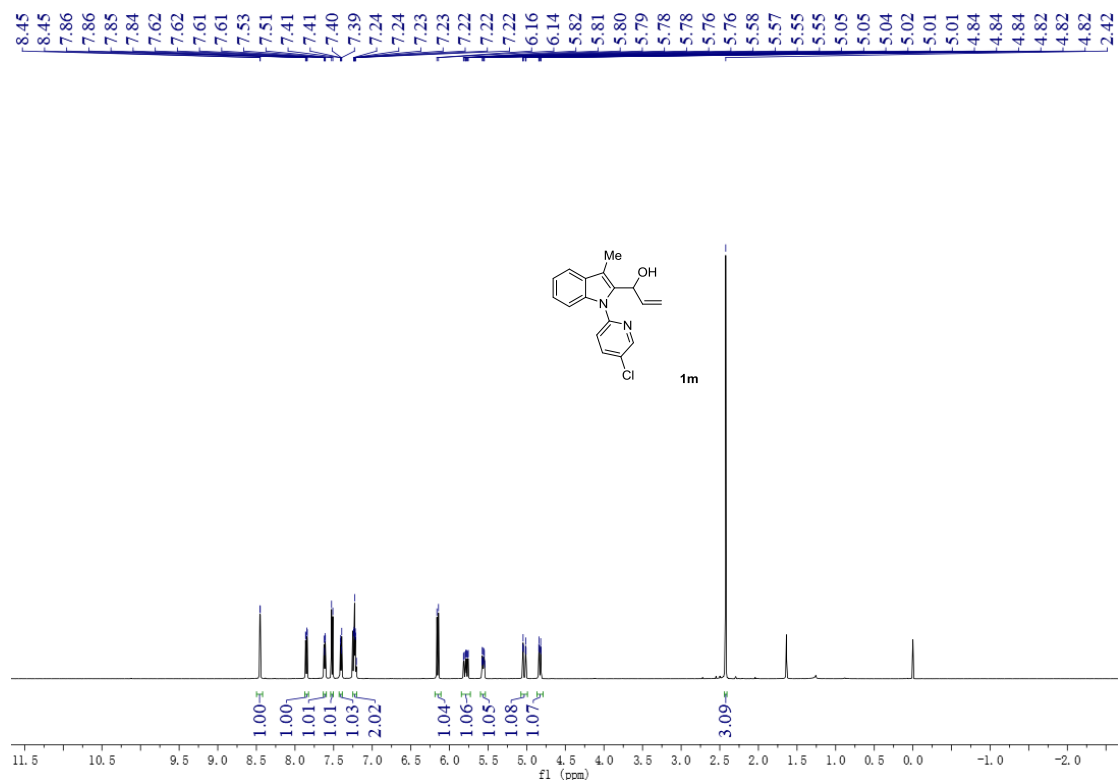

**Supplementary Fig. 80 | <sup>1</sup>H NMR (500 MHz) of compound 1m (using CDCl<sub>3</sub> as solvent)**

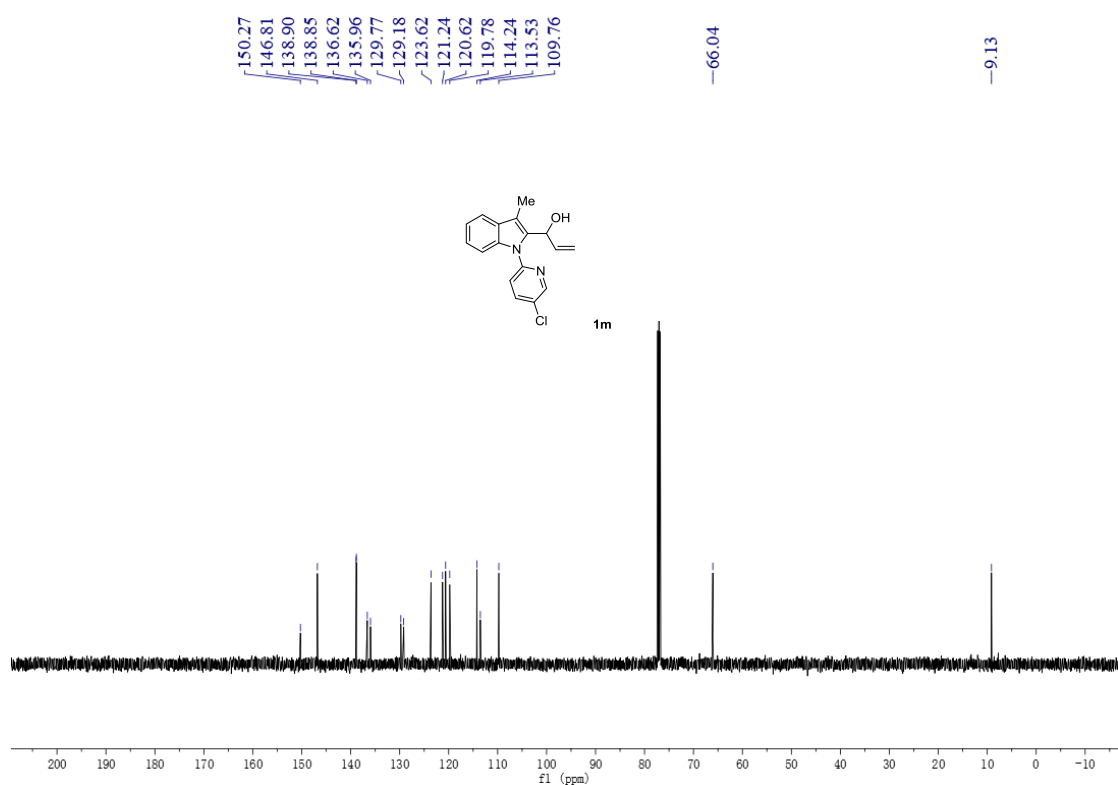

**Supplementary Fig. 81 | <sup>13</sup>C NMR (126 MHz) of compound 1m (using CDCl<sub>3</sub> as solvent)**

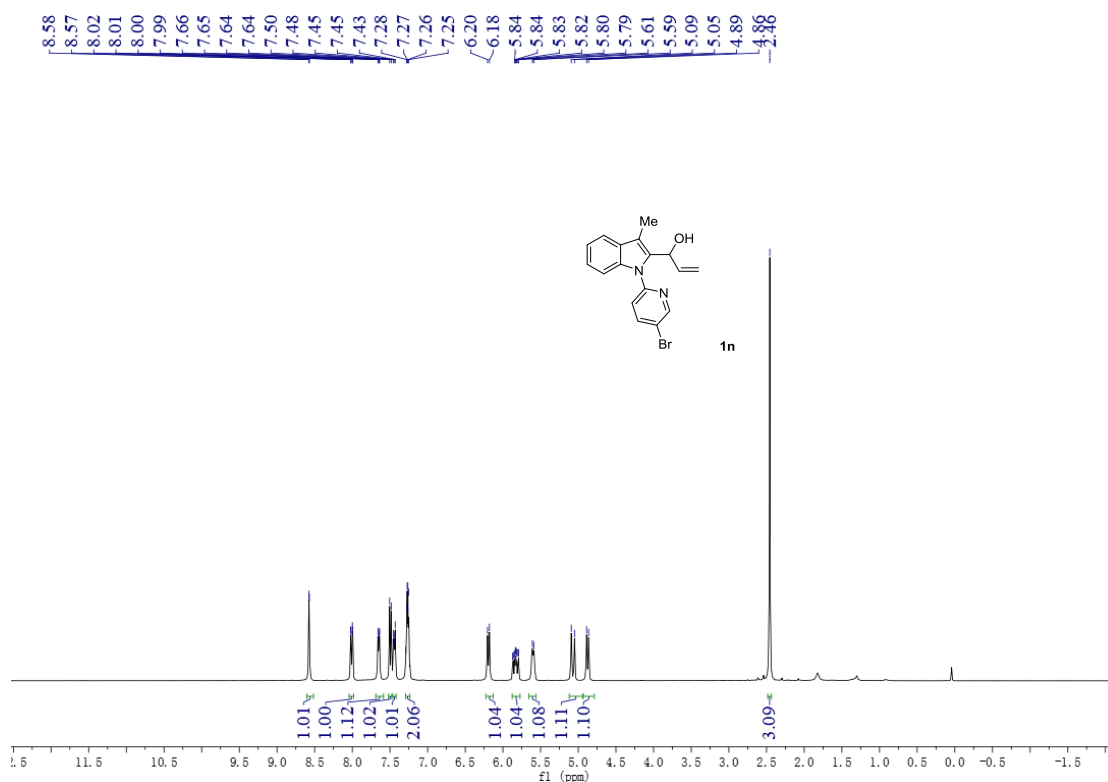

**Supplementary Fig. 82 | <sup>1</sup>H NMR (400 MHz) of compound 1n (using CDCl<sub>3</sub> as solvent)**

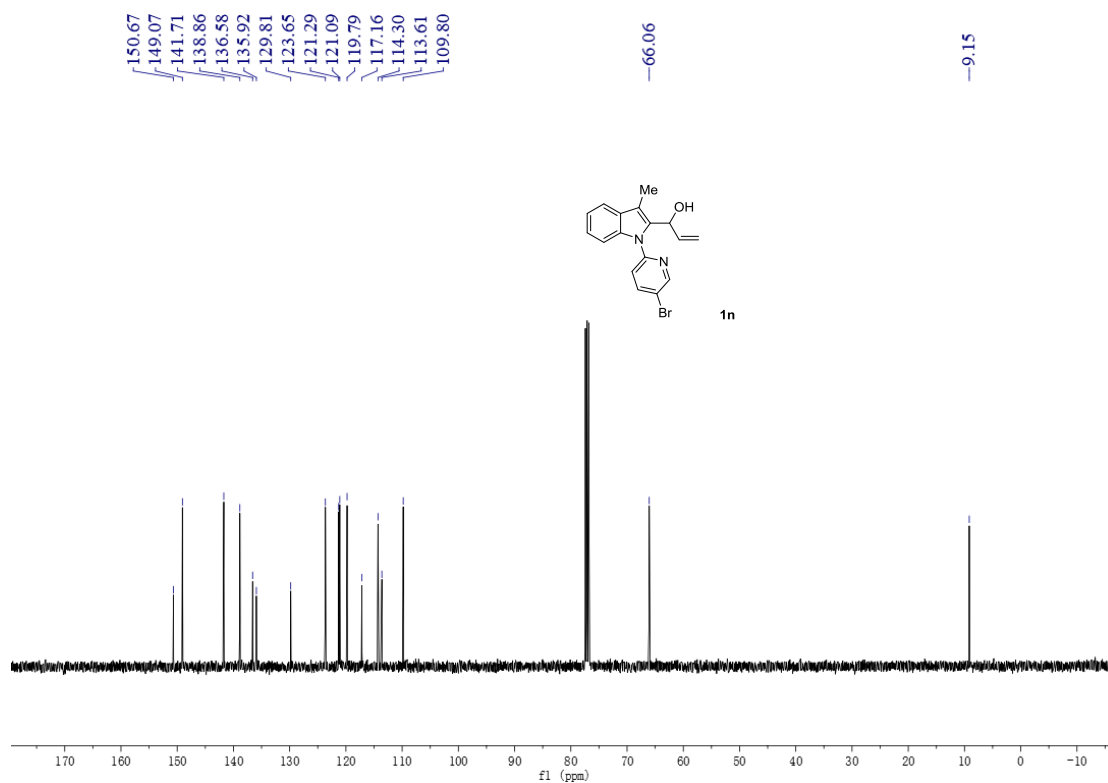

**Supplementary Fig. 83 | <sup>13</sup>C NMR (101 MHz) of compound 1n (using CDCl<sub>3</sub> as solvent)**

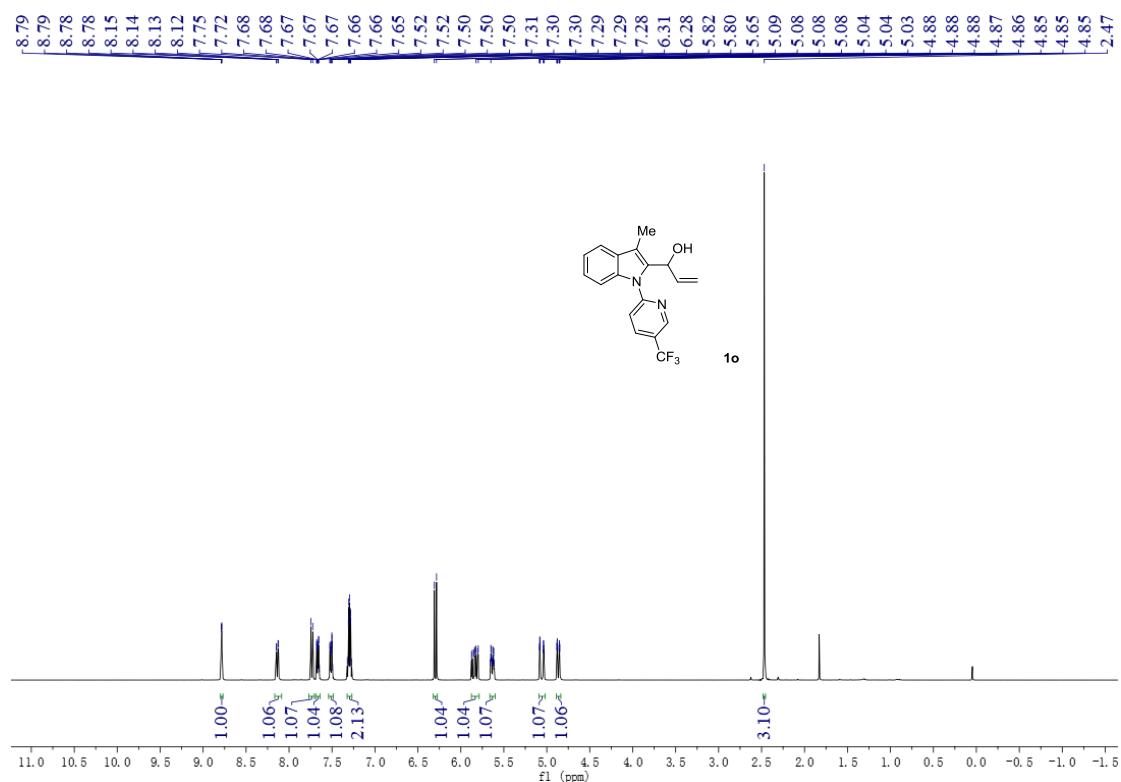

Supplementary Fig. 84 | <sup>1</sup>H NMR (400 MHz) of compound 1o (using CDCl<sub>3</sub> as solvent)

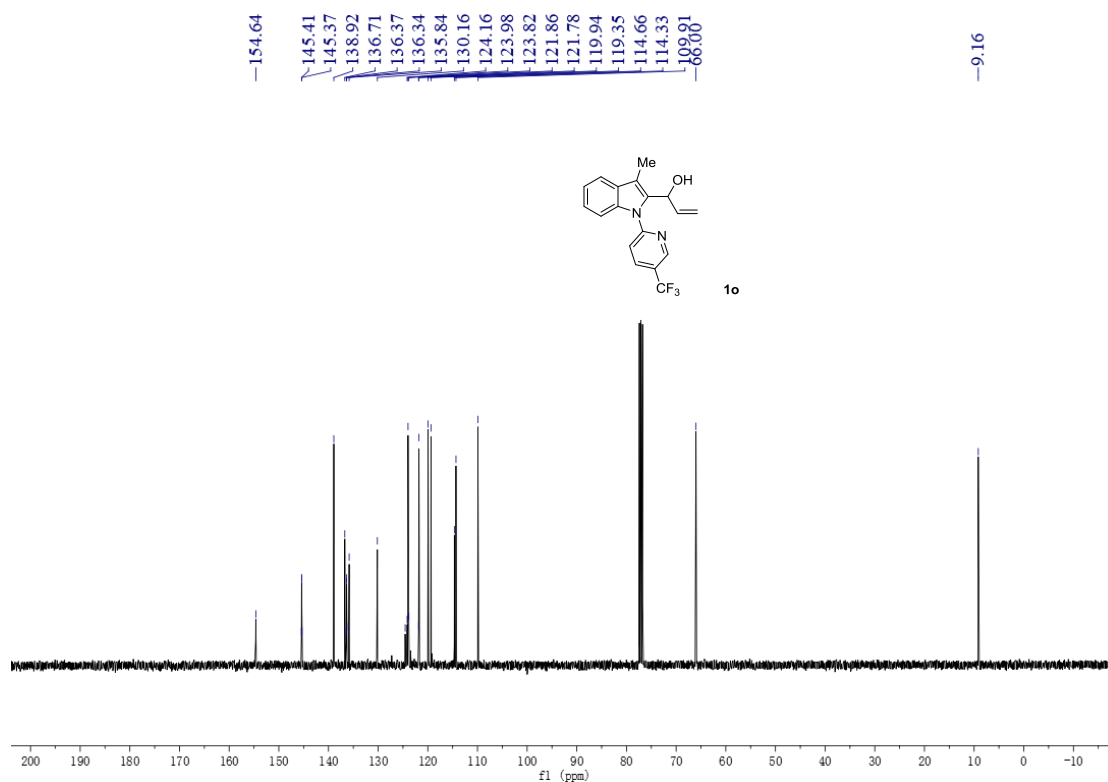

Supplementary Fig. 85 | <sup>13</sup>C NMR (101 MHz) of compound 1o (using CDCl<sub>3</sub> as solvent)

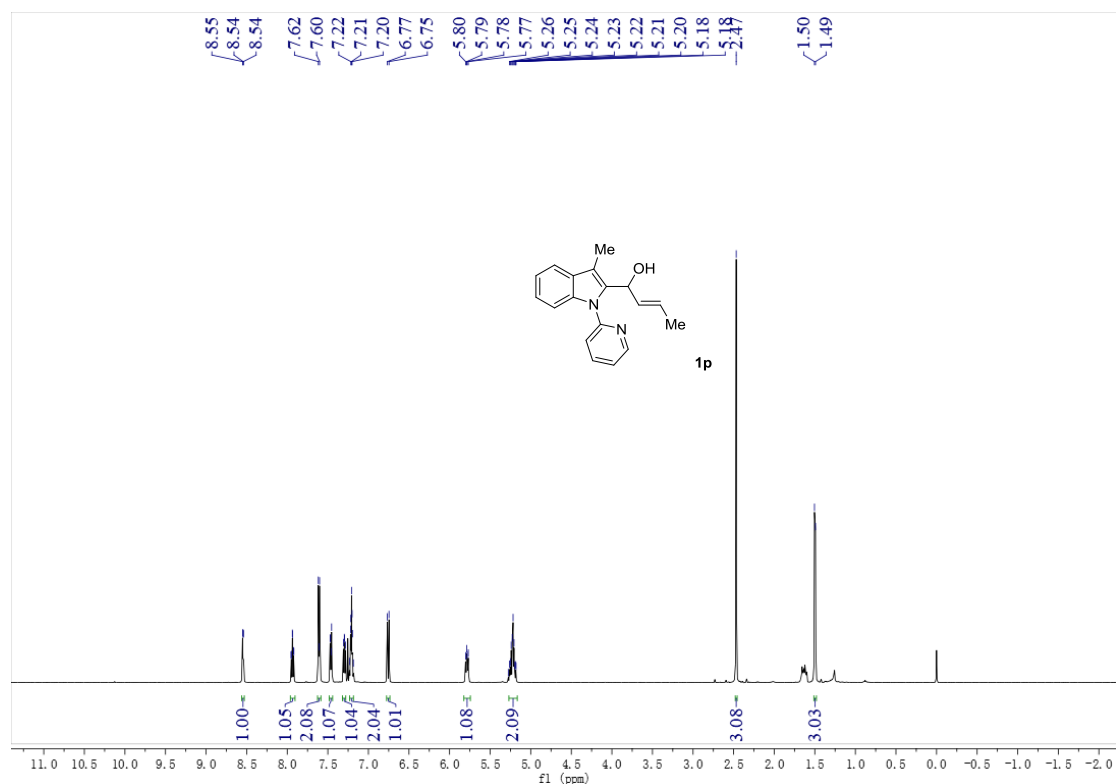

Supplementary Fig. 86 | <sup>1</sup>H NMR (500 MHz) of compound 1p (using CDCl<sub>3</sub> as solvent)

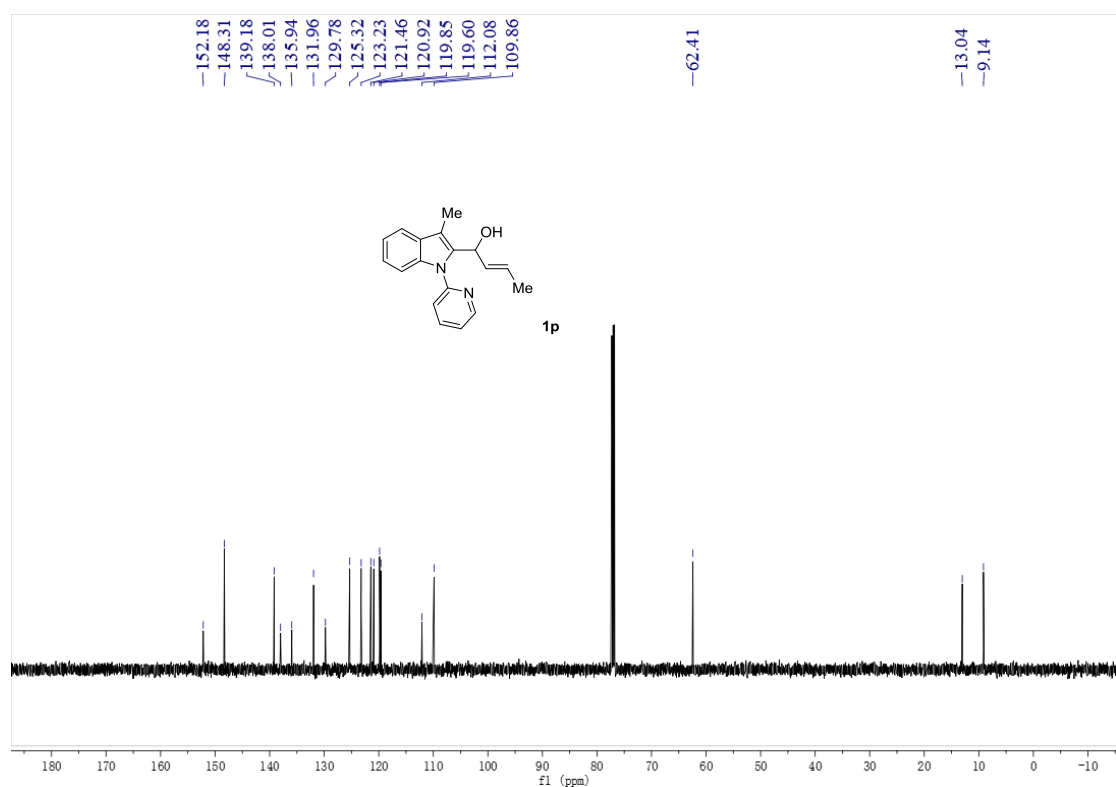

Supplementary Fig. 87 | <sup>13</sup>C NMR (126 MHz) of compound 1p (using CDCl<sub>3</sub> as solvent)

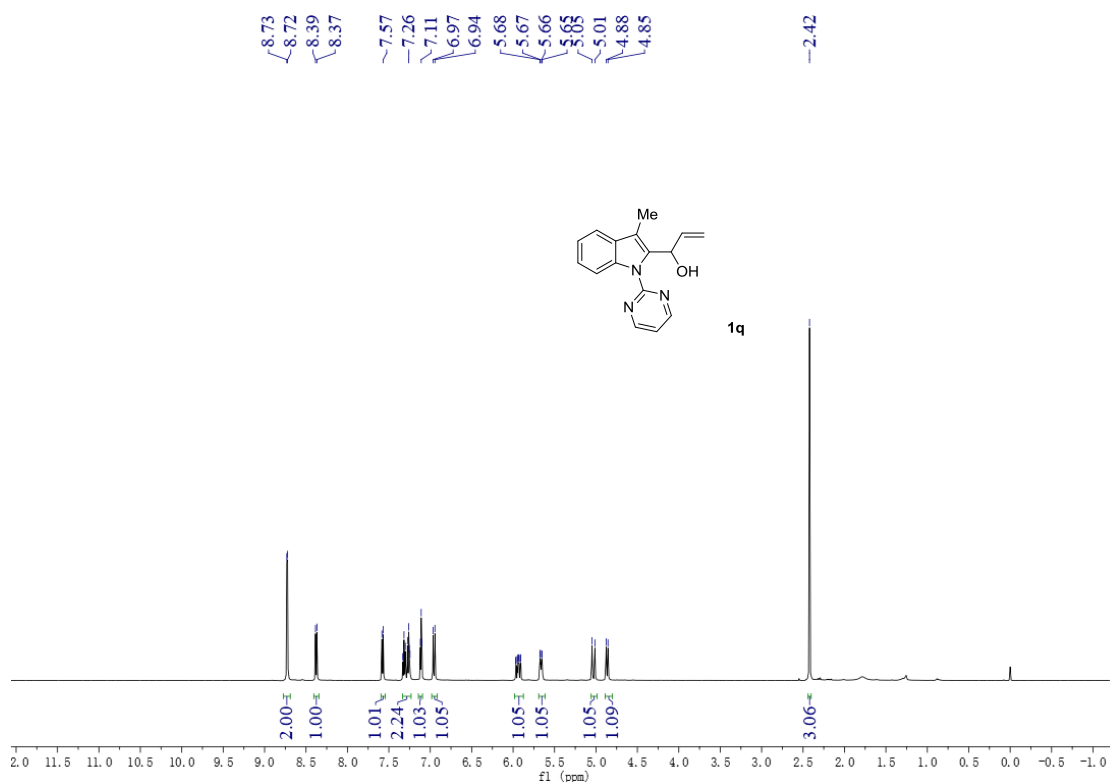

Supplementary Fig. 88 | <sup>1</sup>H NMR (500 MHz) of compound 1q (using CDCl<sub>3</sub> as solvent)

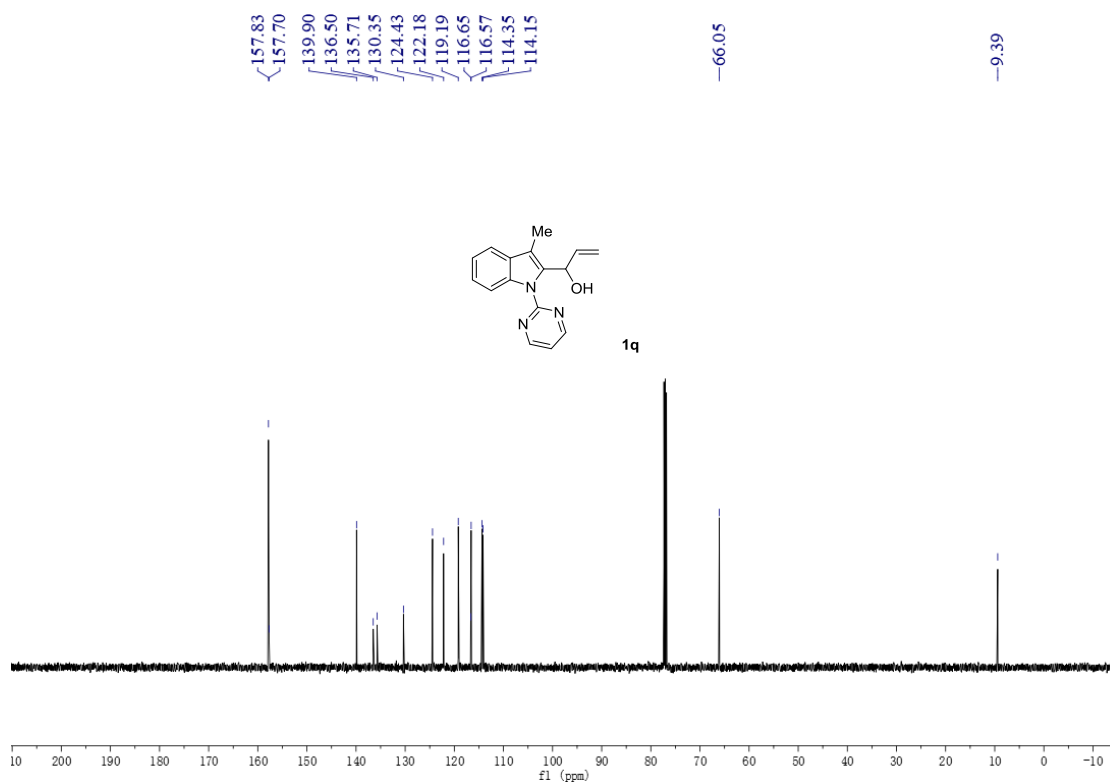

Supplementary Fig. 89 | <sup>13</sup>C NMR (126 MHz) of compound 1q (using CDCl<sub>3</sub> as solvent)

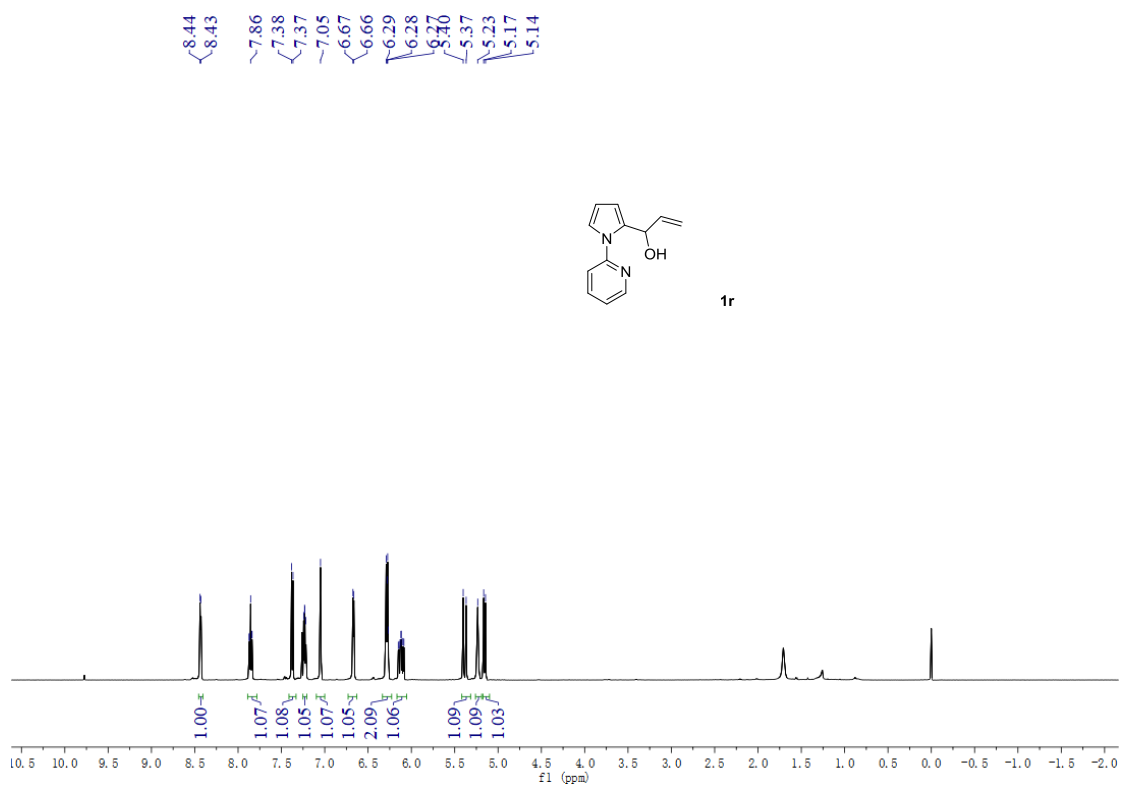

Supplementary Fig. 90 |  $^1\text{H}$  NMR (500 MHz) of compound **1r** (using  $\text{CDCl}_3$  as solvent)

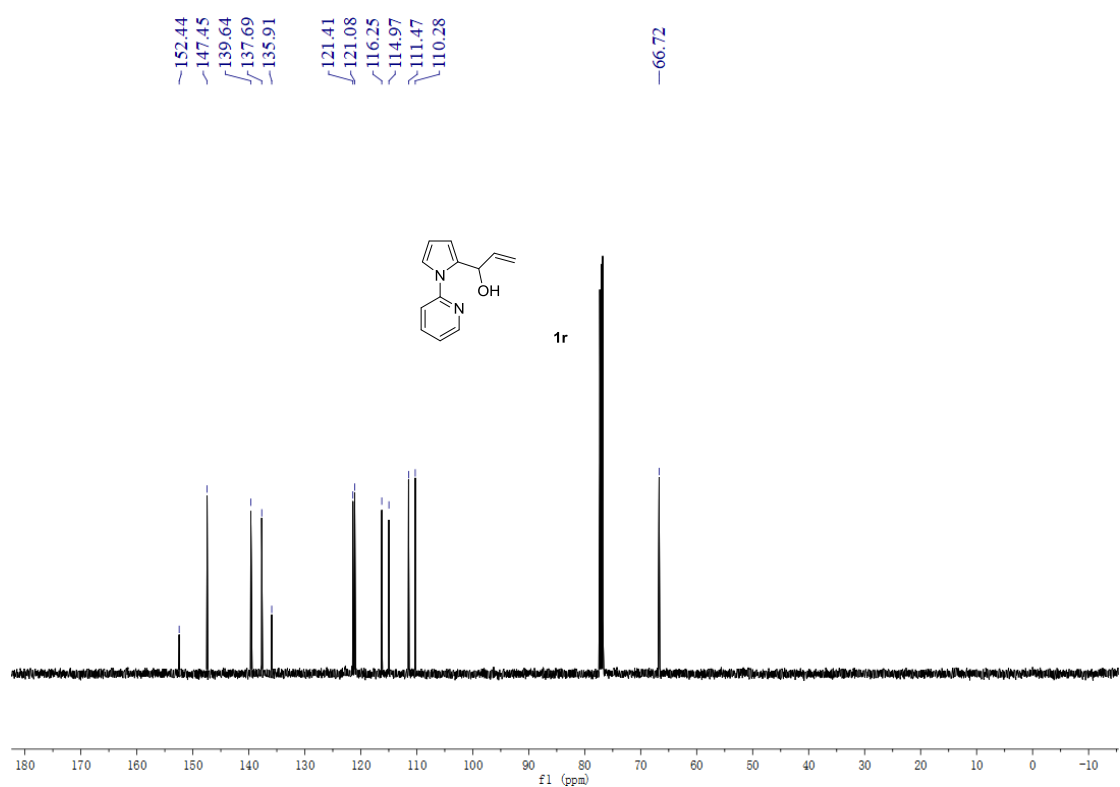

Supplementary Fig. 91 |  $^{13}\text{C}$  NMR (126 MHz) of compound **1r** (using  $\text{CDCl}_3$  as solvent)



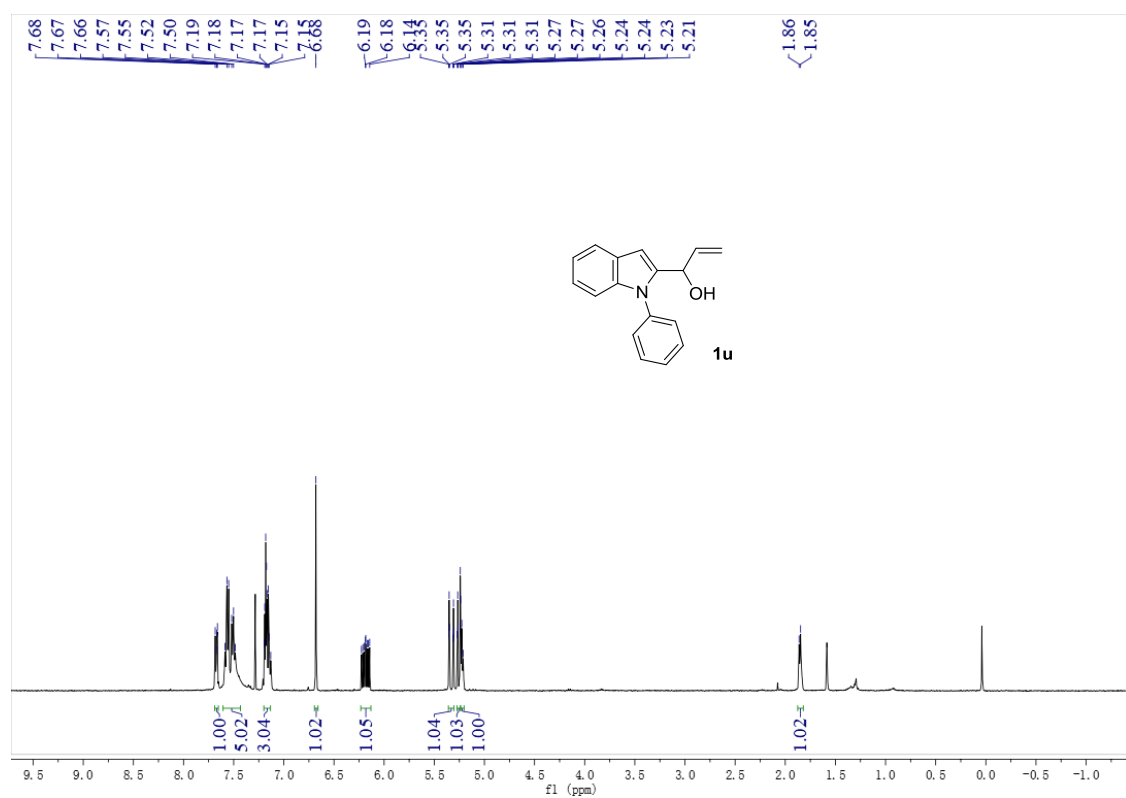

Supplementary Fig. 92 | <sup>1</sup>H NMR (400 MHz) of compound **1u** (using CDCl<sub>3</sub> as solvent)

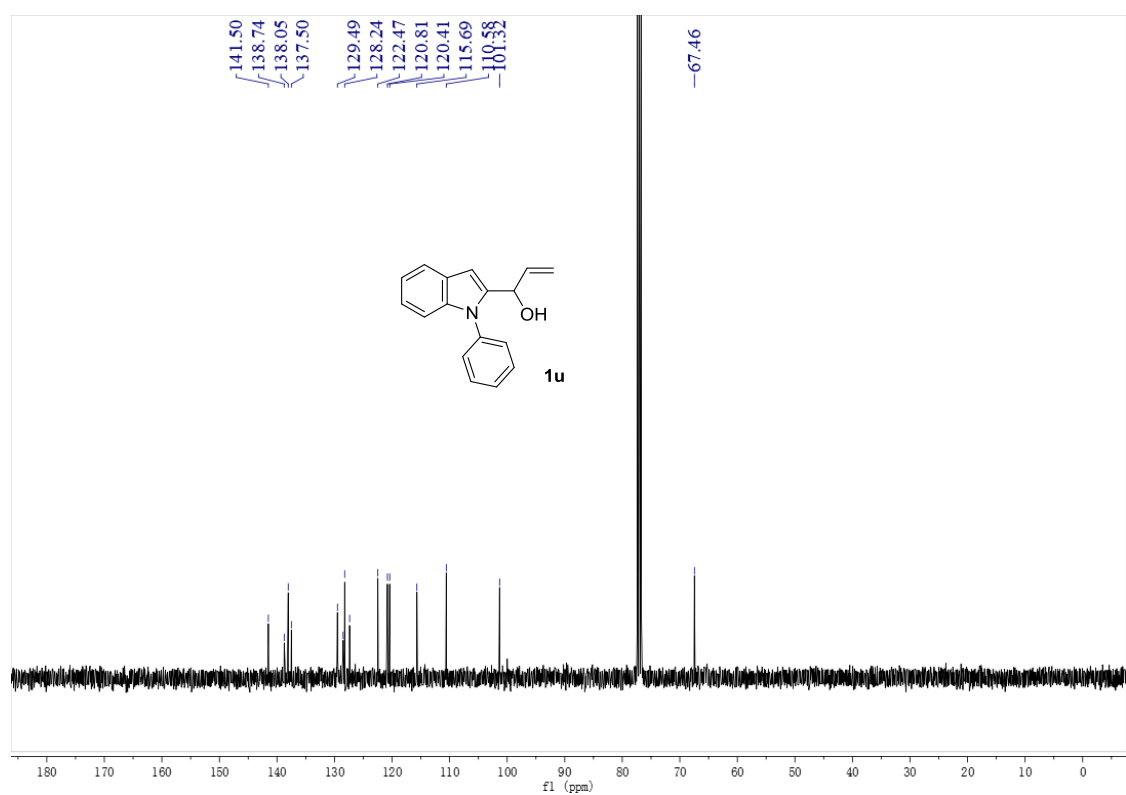

Supplementary Fig. 93 | <sup>13</sup>C NMR (101 MHz) of compound **1u** (using CDCl<sub>3</sub> as solvent)

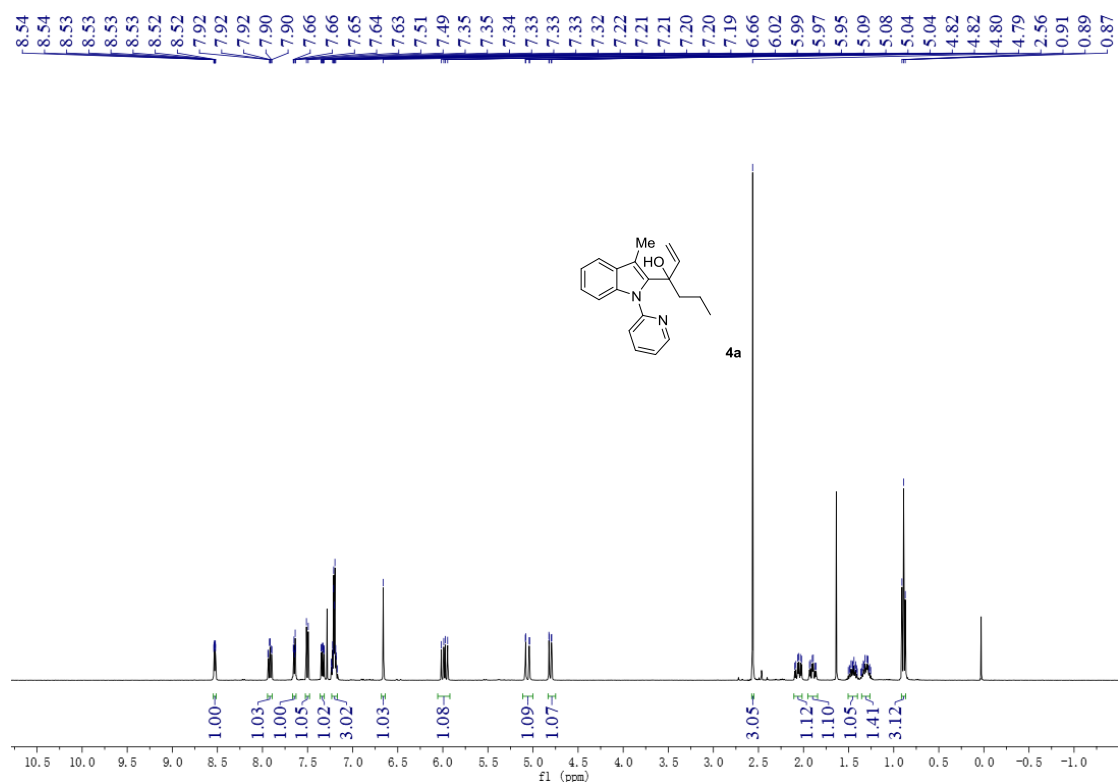

Supplementary Fig. 94 | <sup>1</sup>H NMR (400 MHz) of compound 4a (using CDCl<sub>3</sub> as solvent)

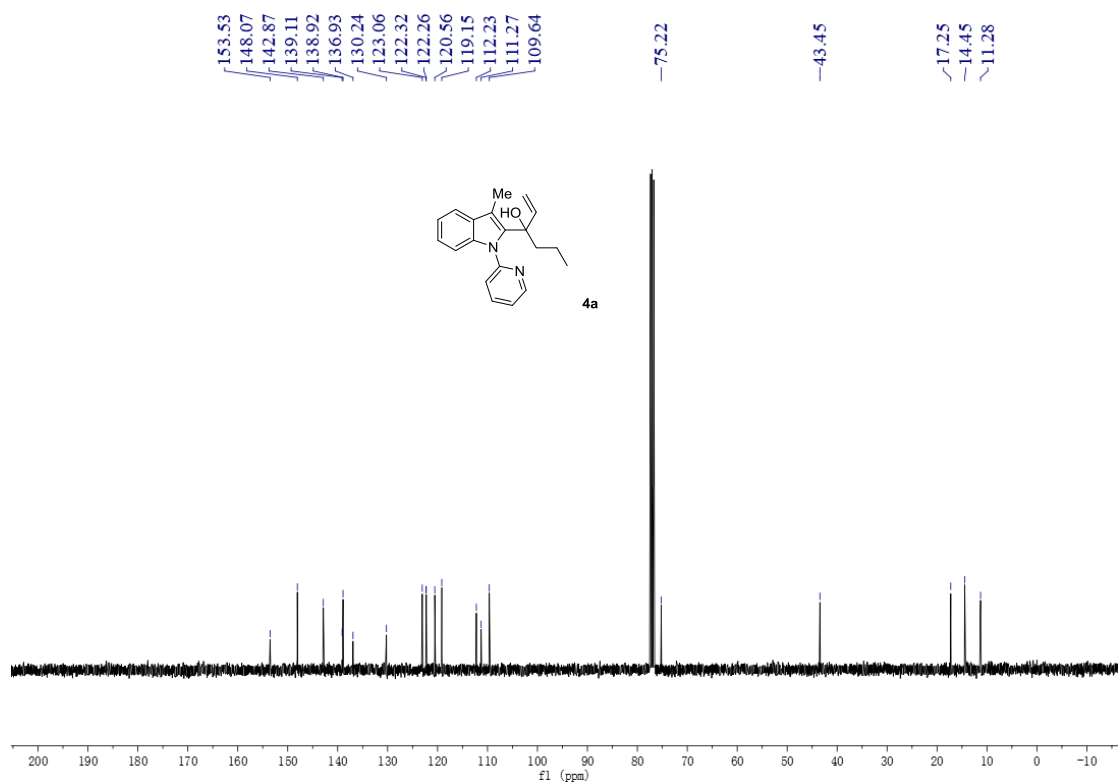

Supplementary Fig. 95 | <sup>13</sup>C NMR (101 MHz) of compound 4a (using CDCl<sub>3</sub> as solvent)

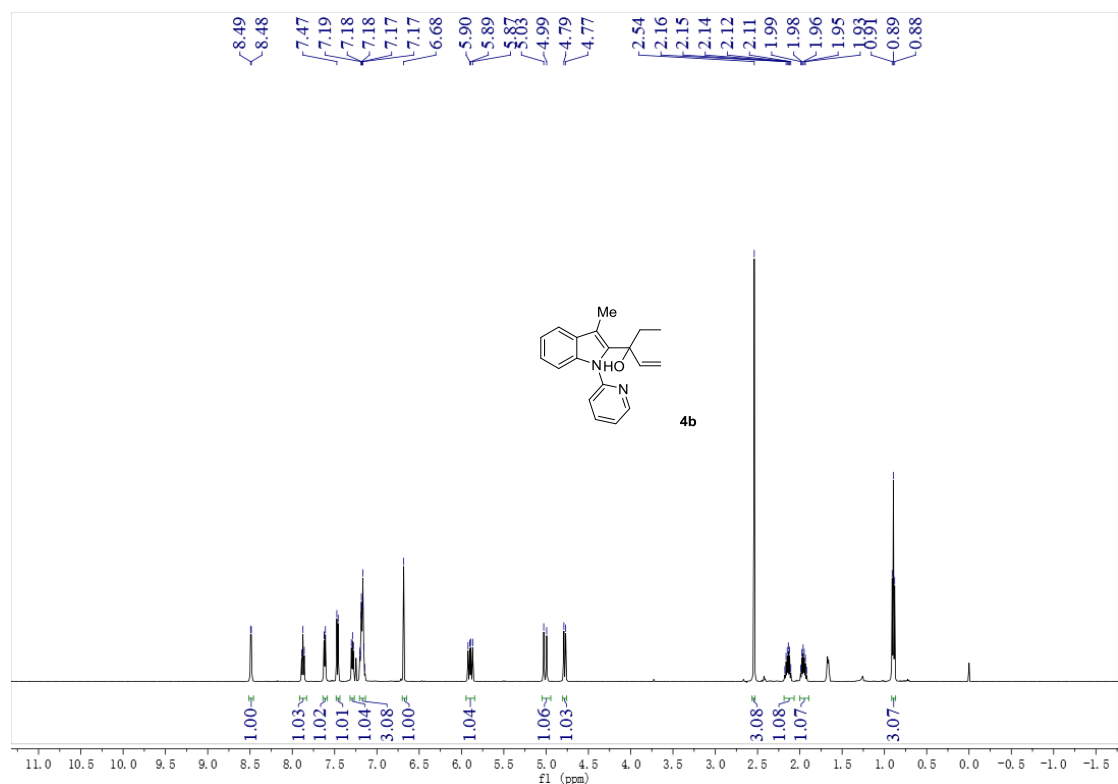

Supplementary Fig. 96 | <sup>1</sup>H NMR (500 MHz) of compound 4b (using CDCl<sub>3</sub> as solvent)

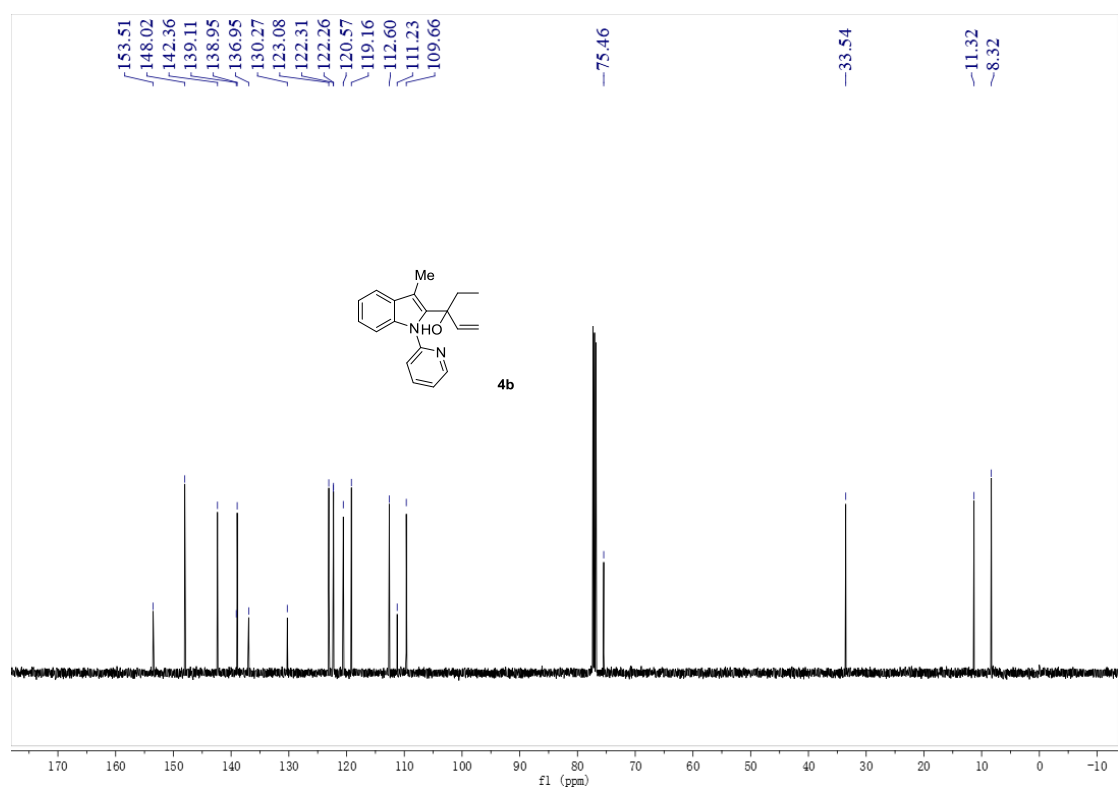

Supplementary Fig. 97 | <sup>13</sup>C NMR (126 MHz) of compound 4b (using CDCl<sub>3</sub> as solvent)

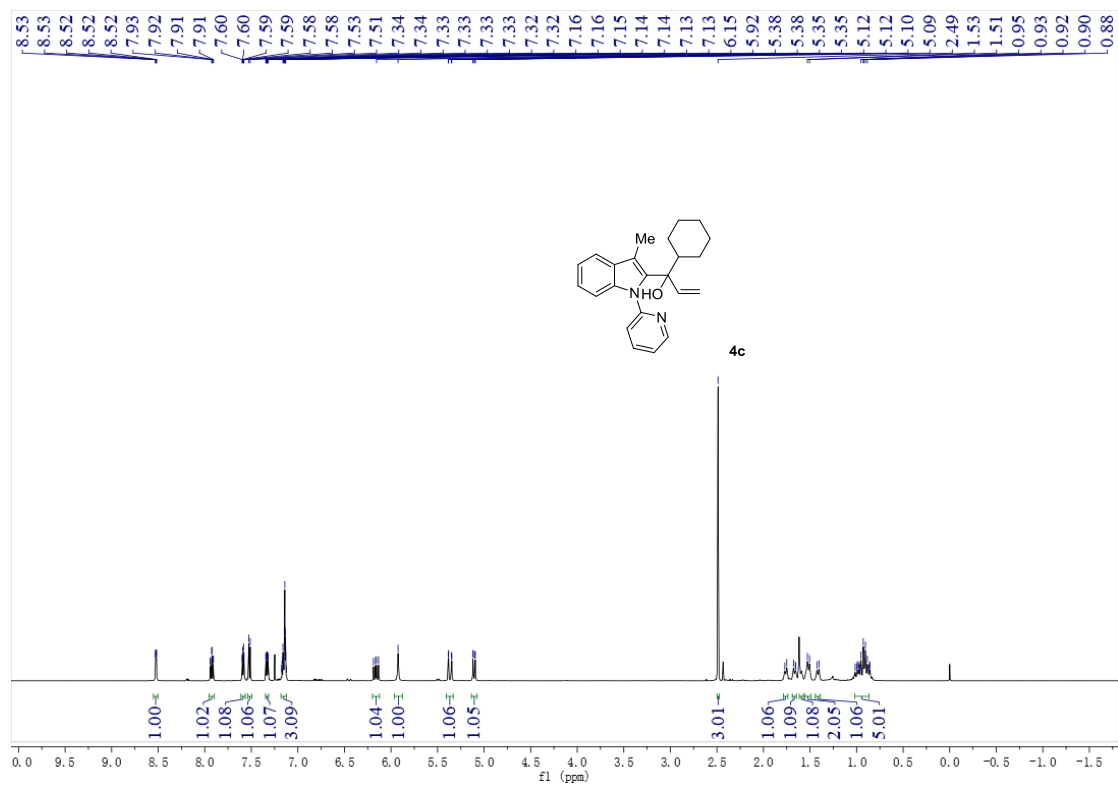

Supplementary Fig. 98 | <sup>1</sup>H NMR (500 MHz) of compound 4c (using CDCl<sub>3</sub> as solvent)

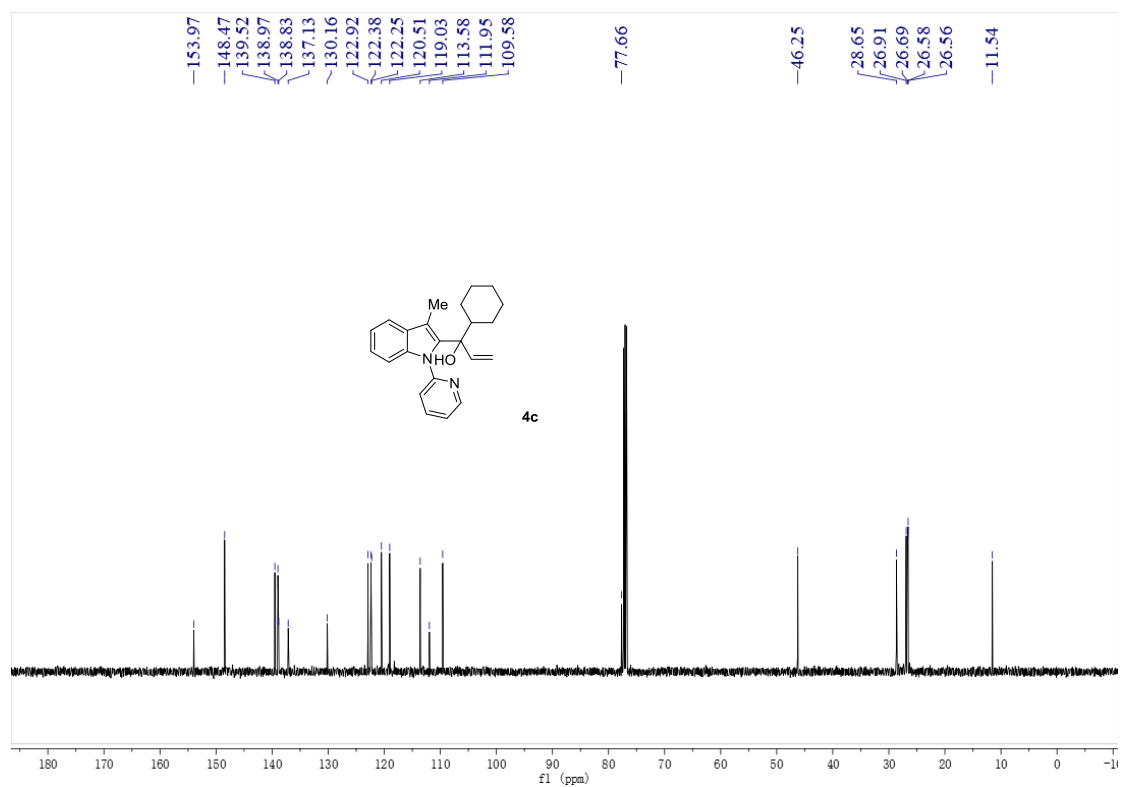

Supplementary Fig. 99 | <sup>13</sup>C NMR (126 MHz) of compound 4c (using CDCl<sub>3</sub> as solvent)

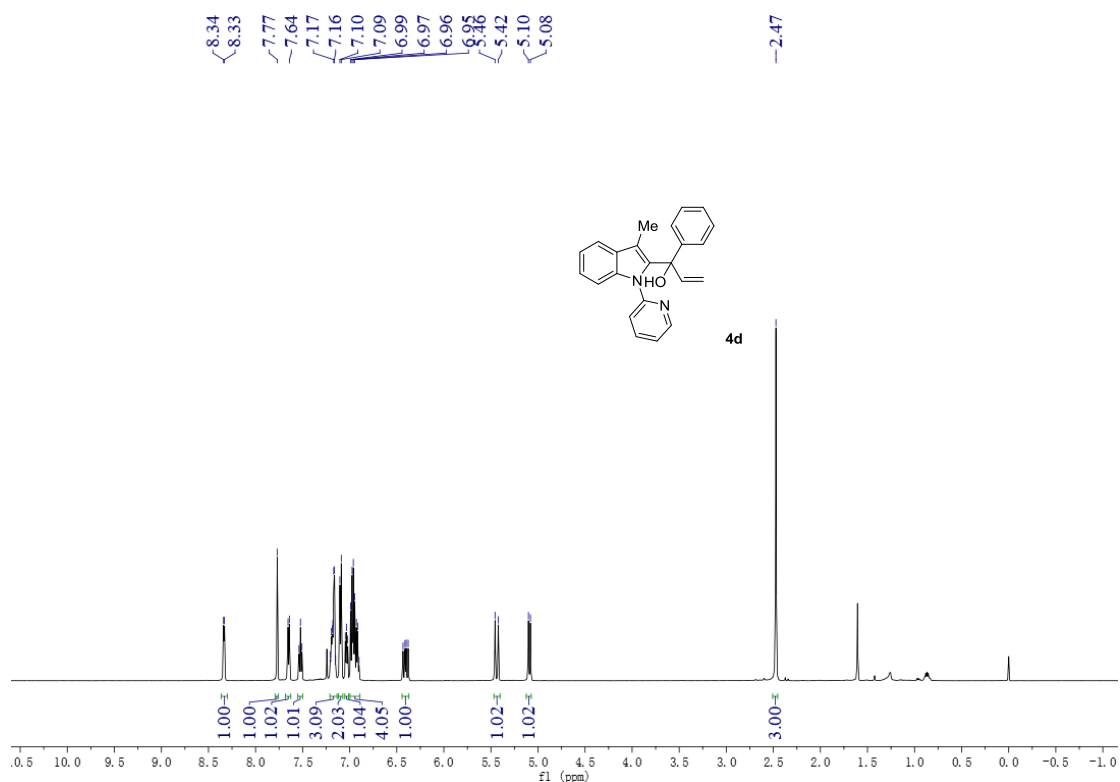

Supplementary Fig. 100 | <sup>1</sup>H NMR (500 MHz) of compound 4d (using CDCl<sub>3</sub> as solvent)

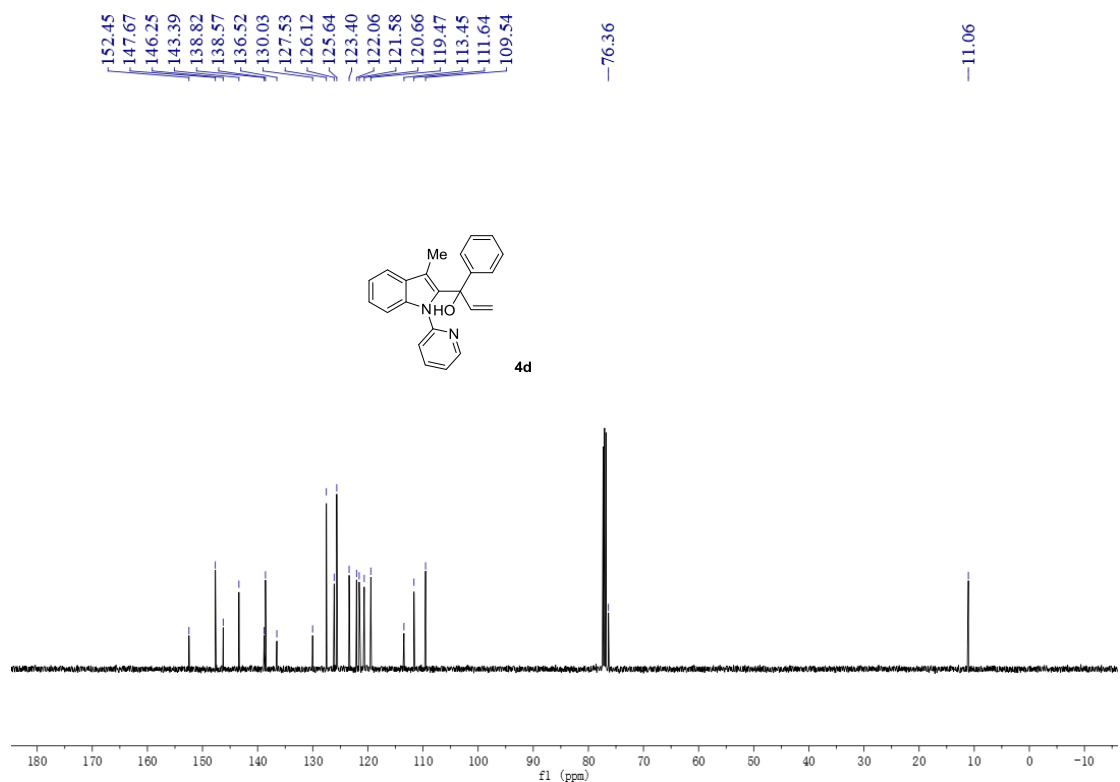

Supplementary Fig. 101 | <sup>13</sup>C NMR (126 MHz) of compound 4d (using CDCl<sub>3</sub> as solvent)

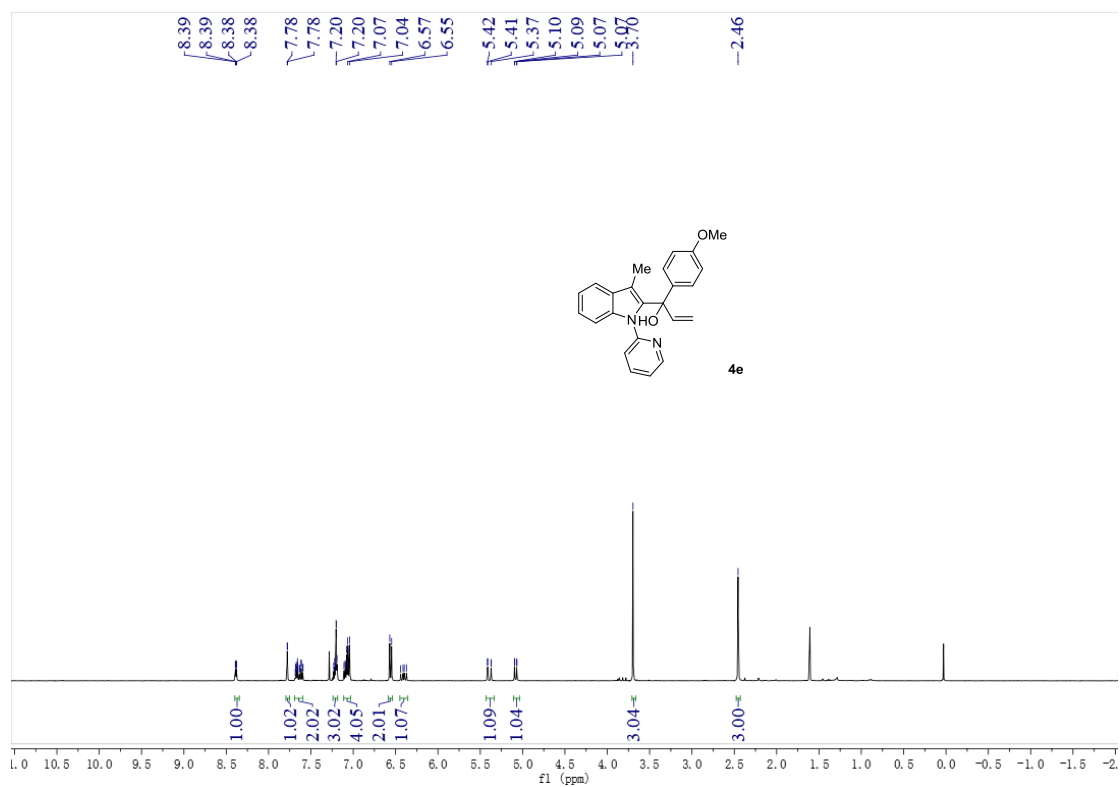

Supplementary Fig. 102 | <sup>1</sup>H NMR (400 MHz) of compound 4e (using CDCl<sub>3</sub> as solvent)

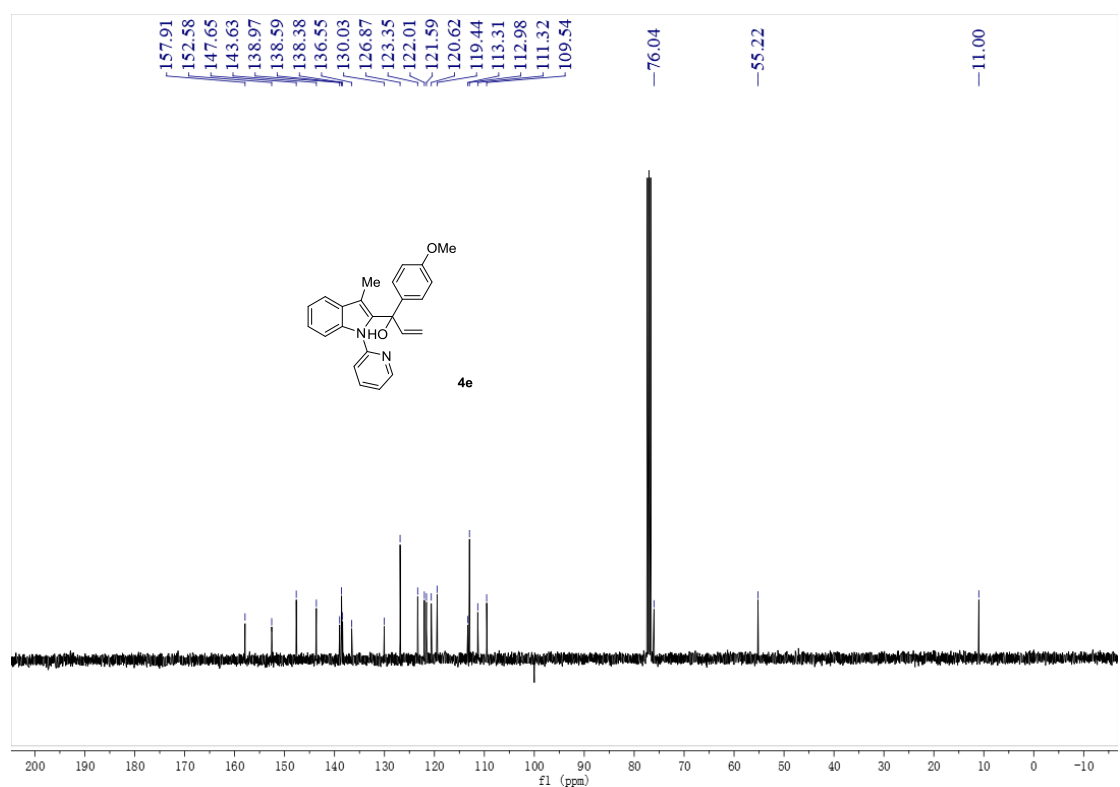

Supplementary Fig. 103 | <sup>13</sup>C NMR (101 MHz) of compound 4e (using CDCl<sub>3</sub> as solvent)

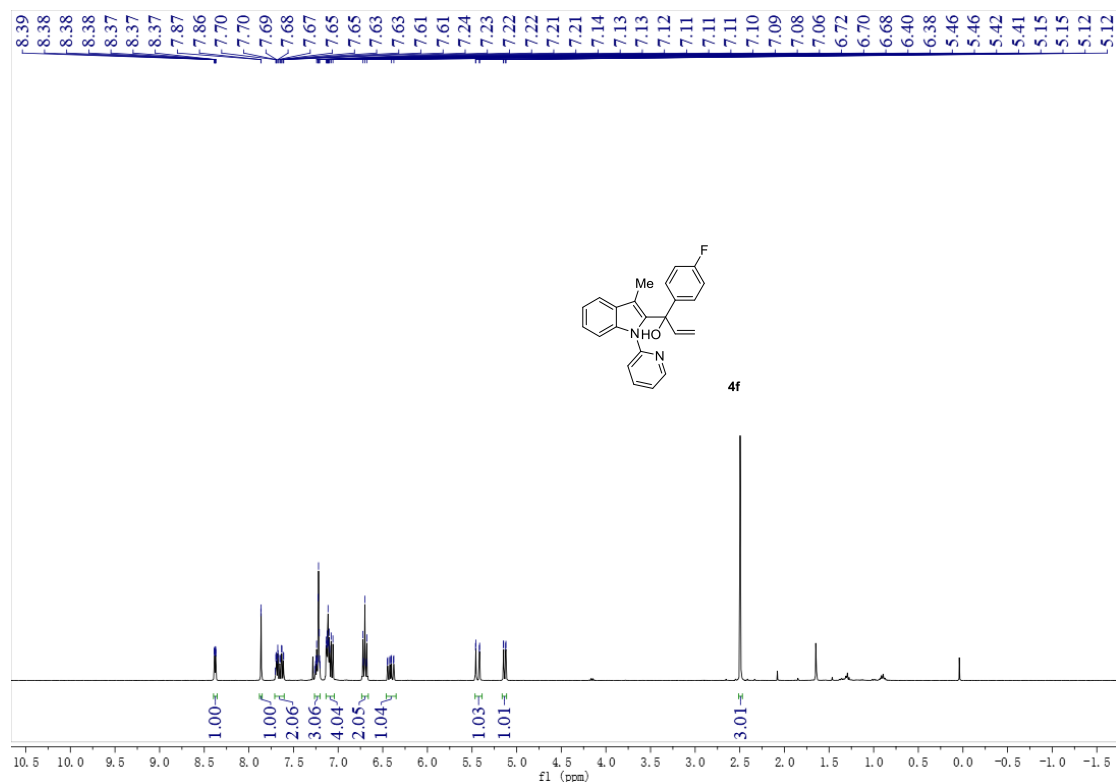

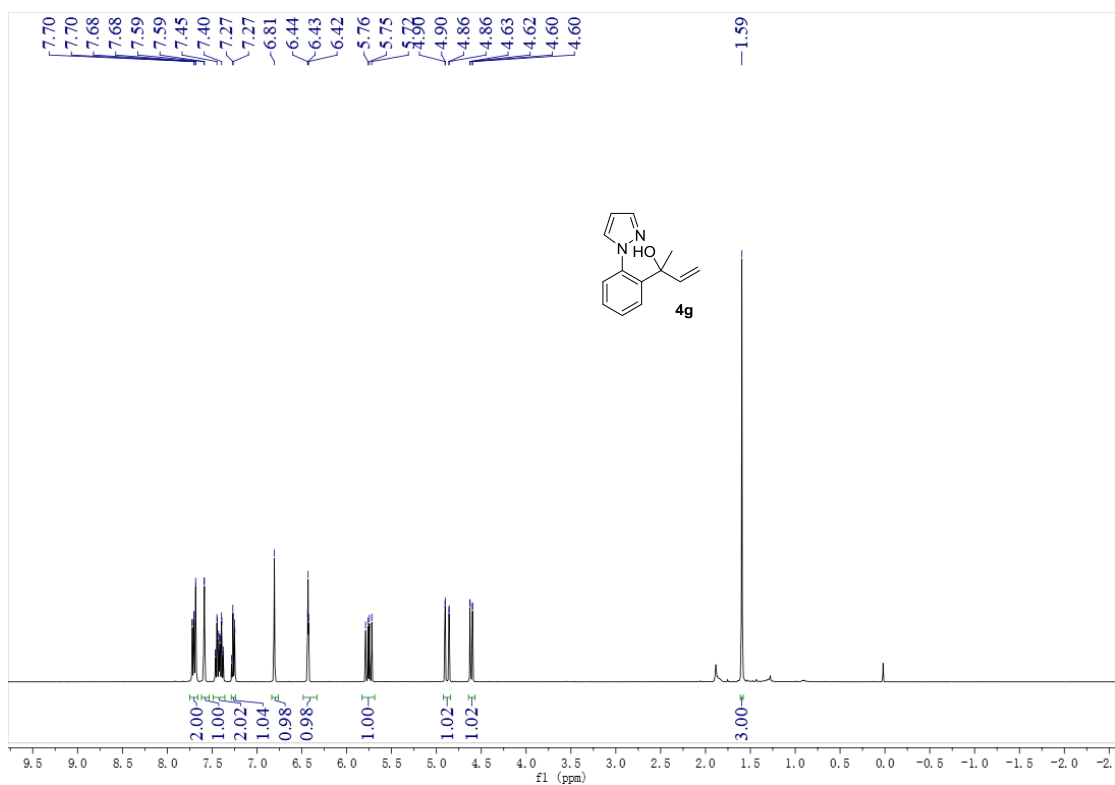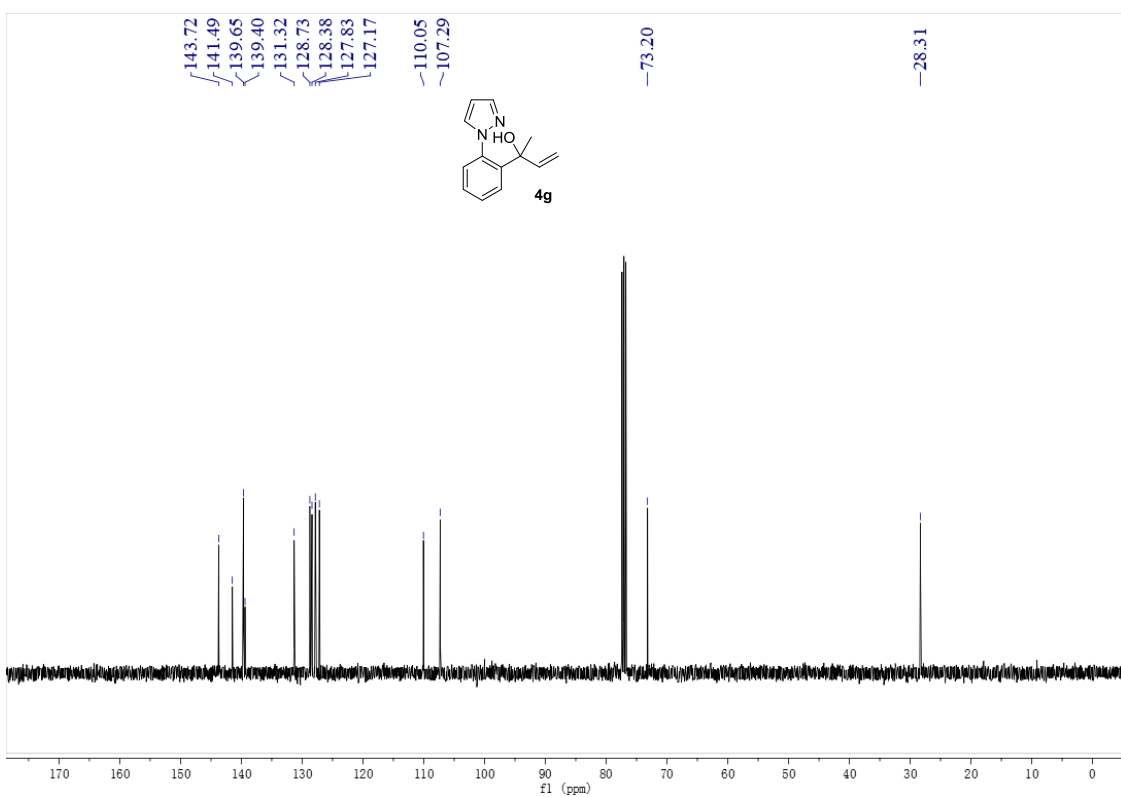



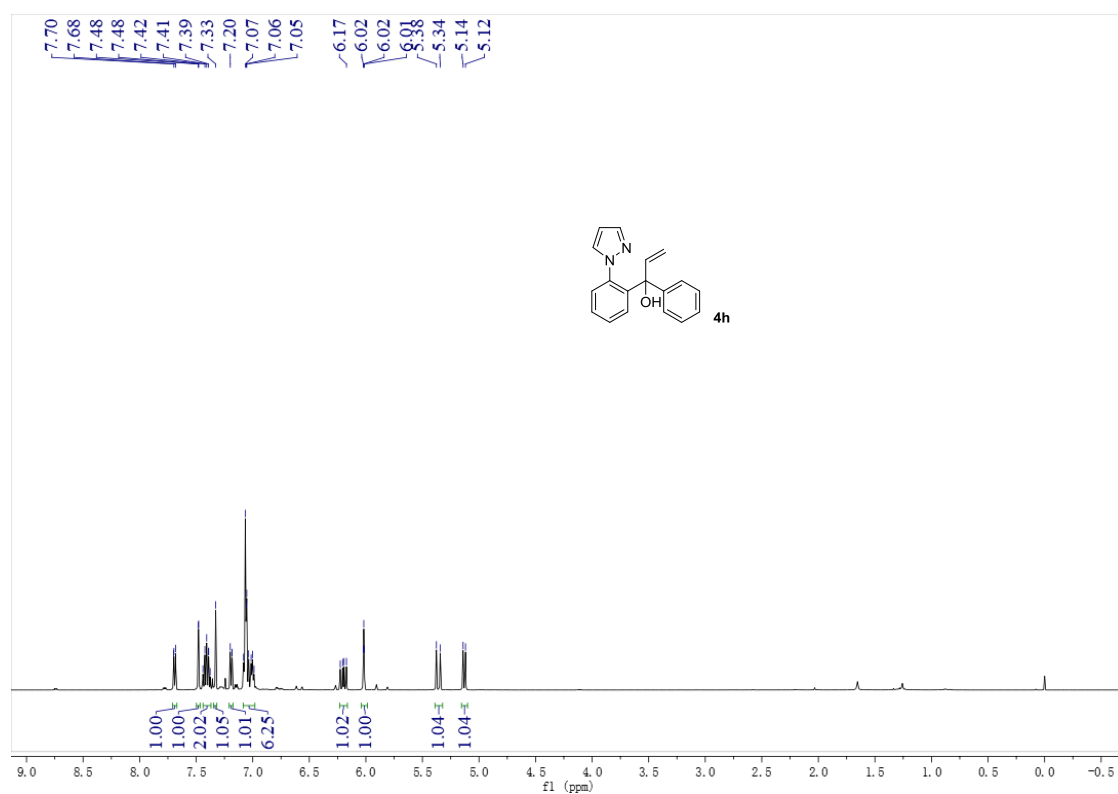

Supplementary Fig. 108 | <sup>1</sup>H NMR (500 MHz) of compound 4h (using CDCl<sub>3</sub> as solvent)

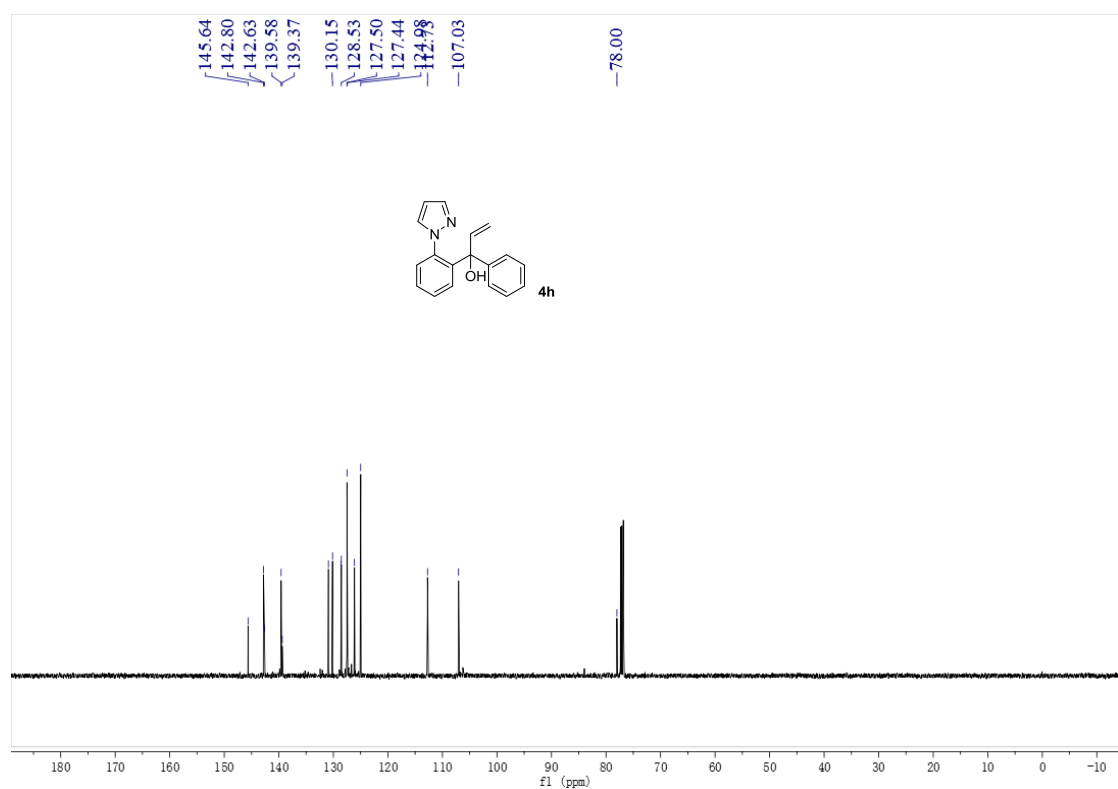

Supplementary Fig. 109 | <sup>13</sup>C NMR (126 MHz) of compound 4h (using CDCl<sub>3</sub> as solvent)

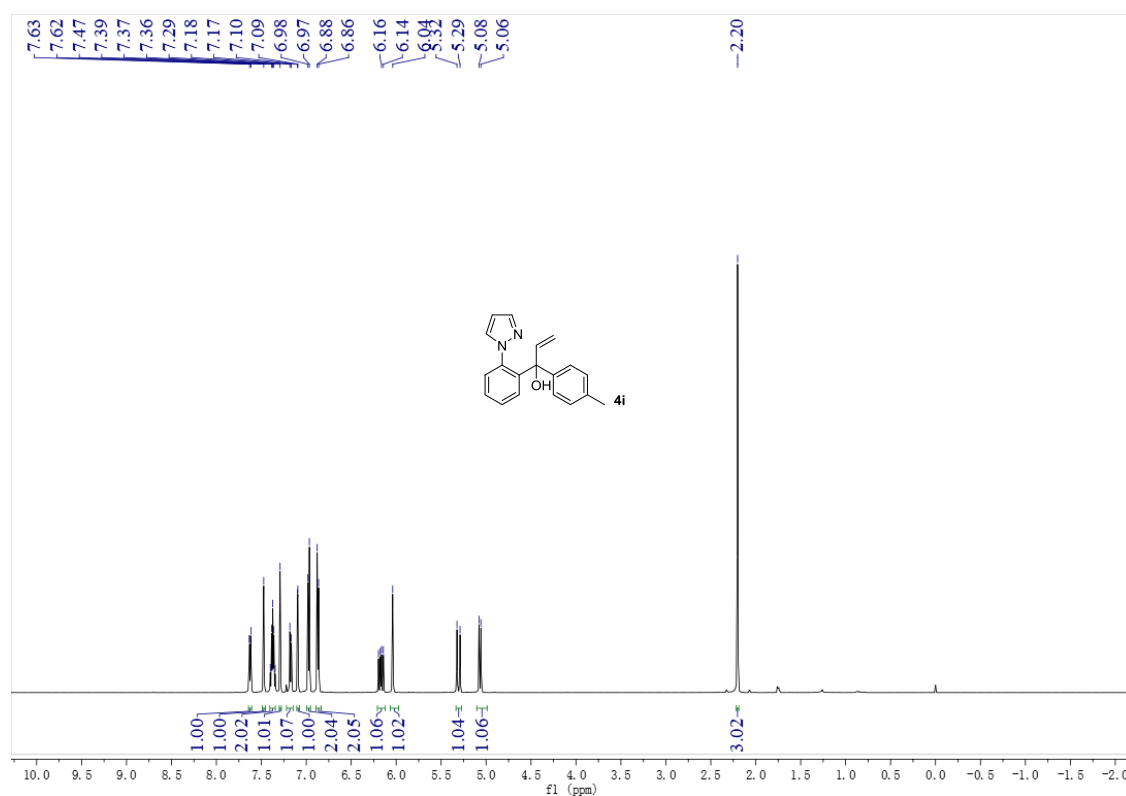

Supplementary Fig. 110 | <sup>1</sup>H NMR (500 MHz) of compound 4i (using CDCl<sub>3</sub> as solvent)

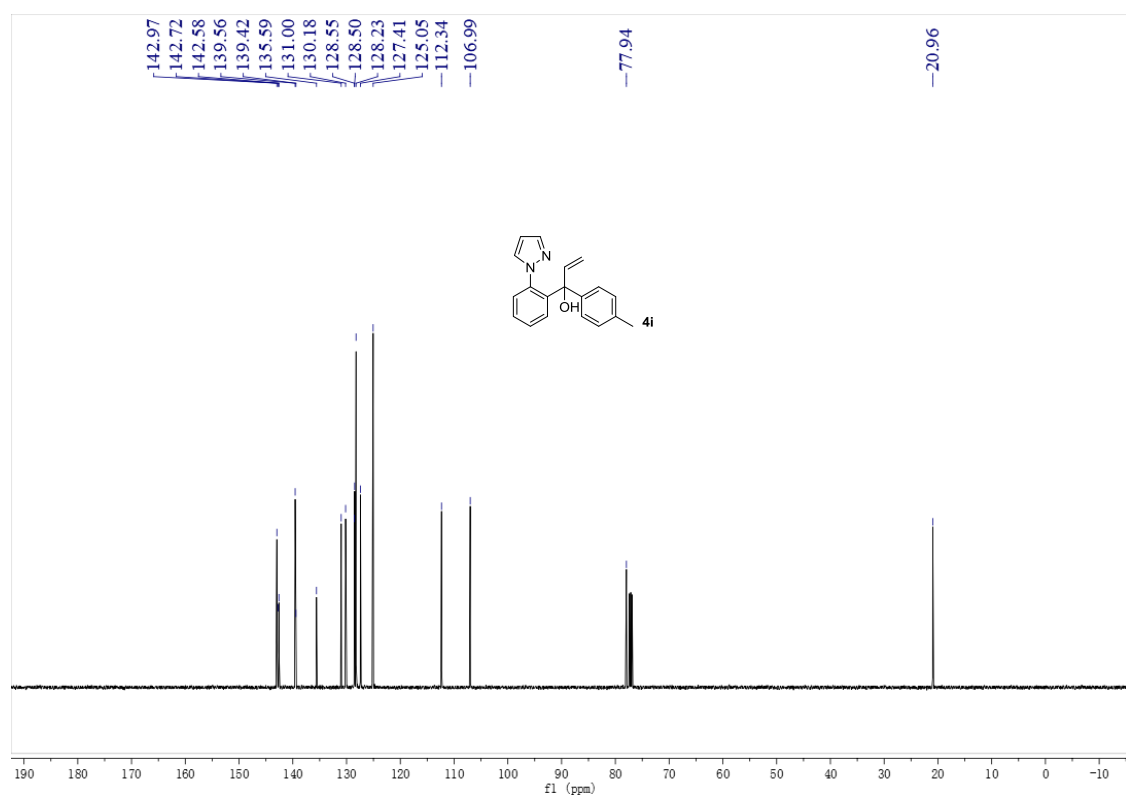

Supplementary Fig. 111 | <sup>13</sup>C NMR (126 MHz) of compound 4i (using CDCl<sub>3</sub> as solvent)

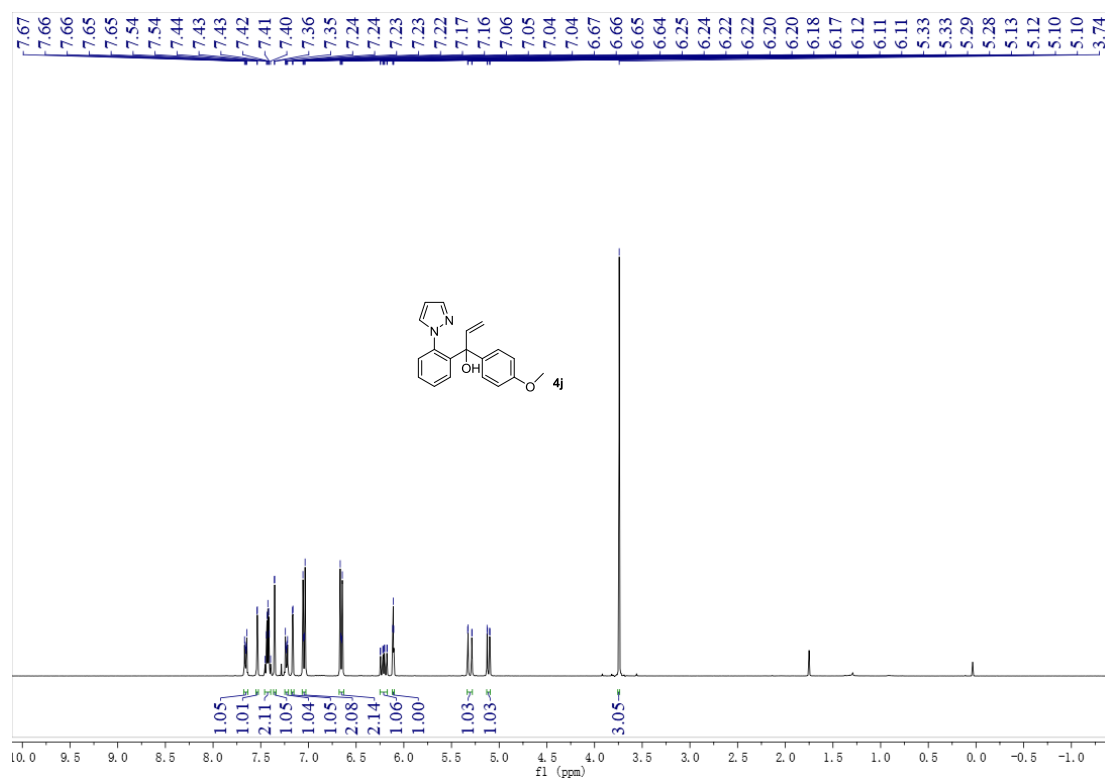

Supplementary Fig. 112 |  $^1\text{H}$  NMR (400 MHz) of compound 4j (using  $\text{CDCl}_3$  as solvent)

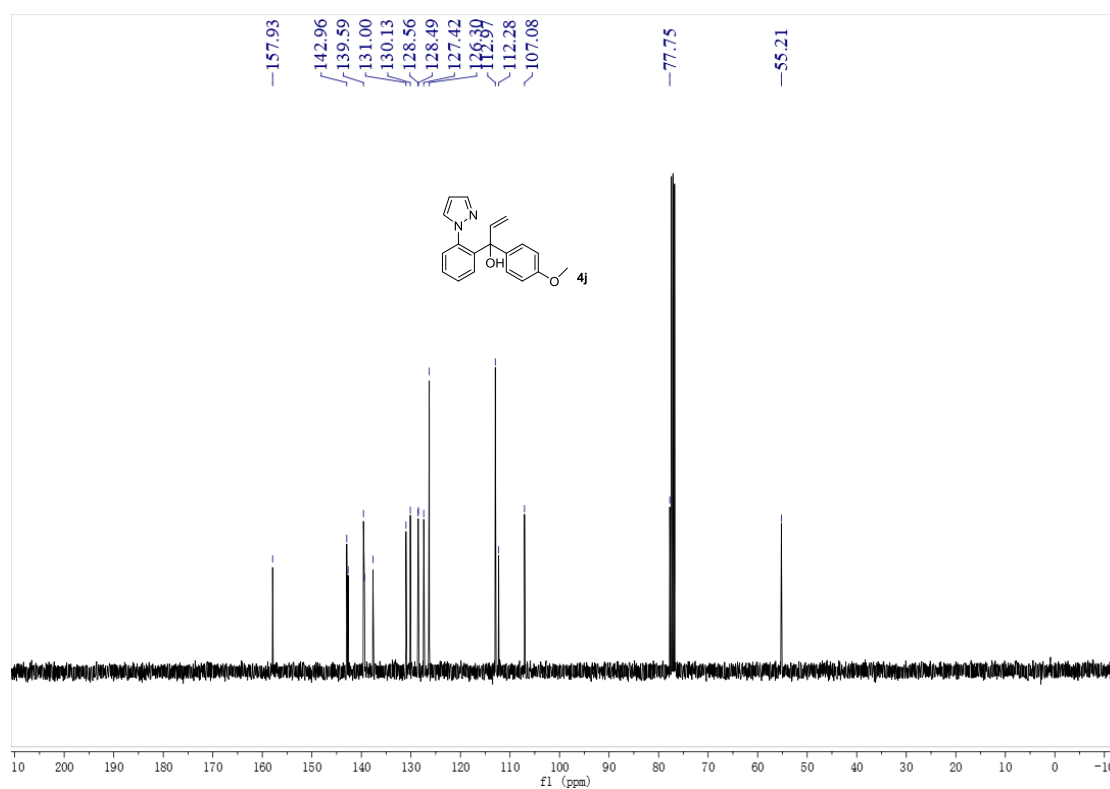

Supplementary Fig. 113 |  $^{13}\text{C}$  NMR (101 MHz) of compound 4j (using  $\text{CDCl}_3$  as solvent)

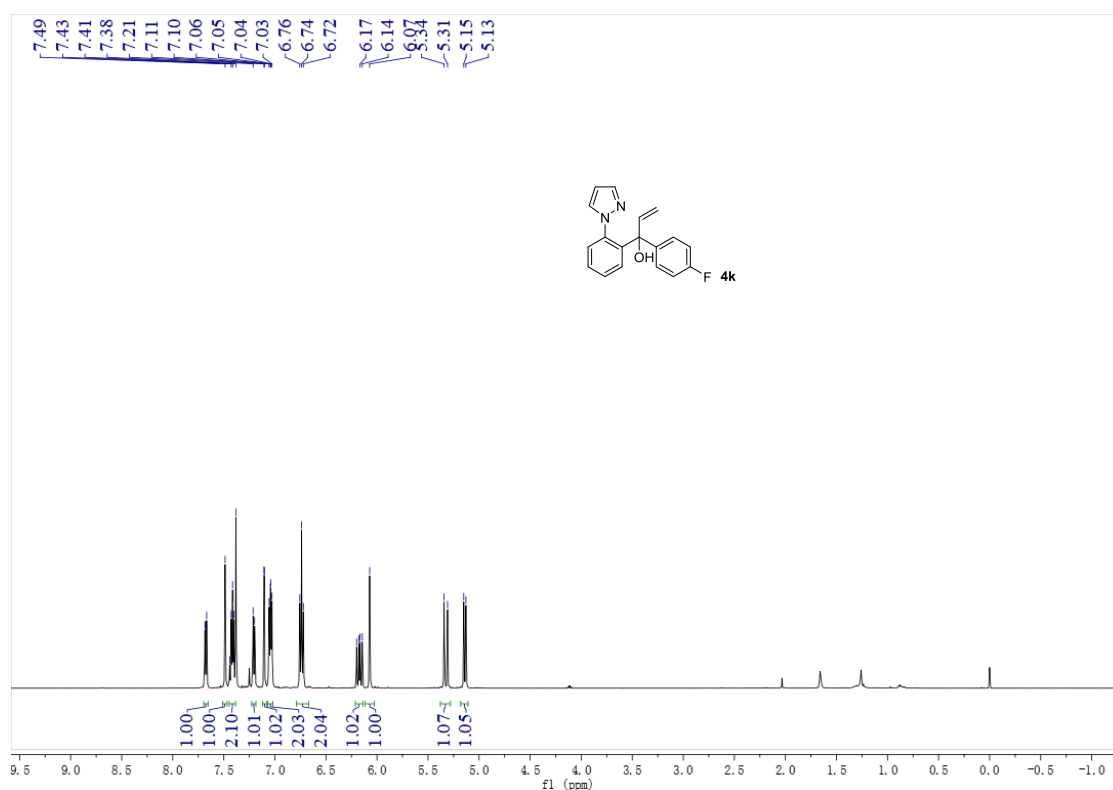

Supplementary Fig. 114 | <sup>1</sup>H NMR (500 MHz) of compound 4k (using CDCl<sub>3</sub> as solvent)

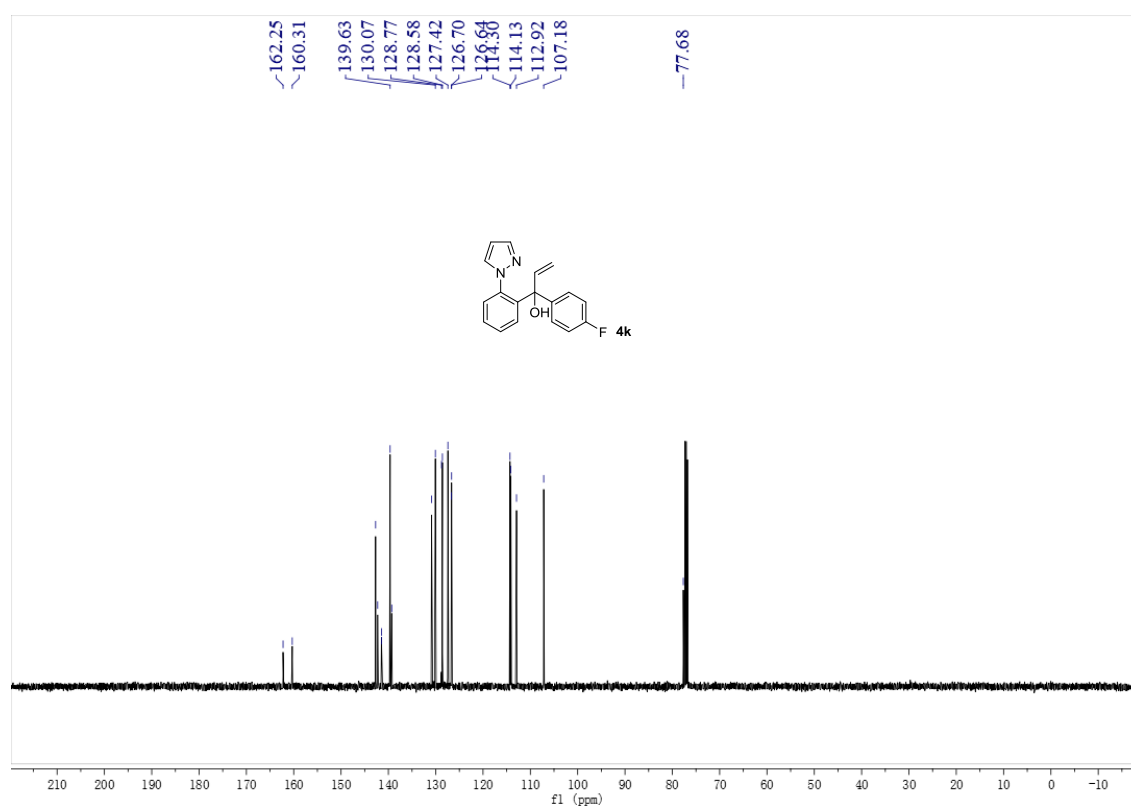

Supplementary Fig. 115 | <sup>13</sup>C NMR (126 MHz) of compound 4k (using CDCl<sub>3</sub> as solvent)

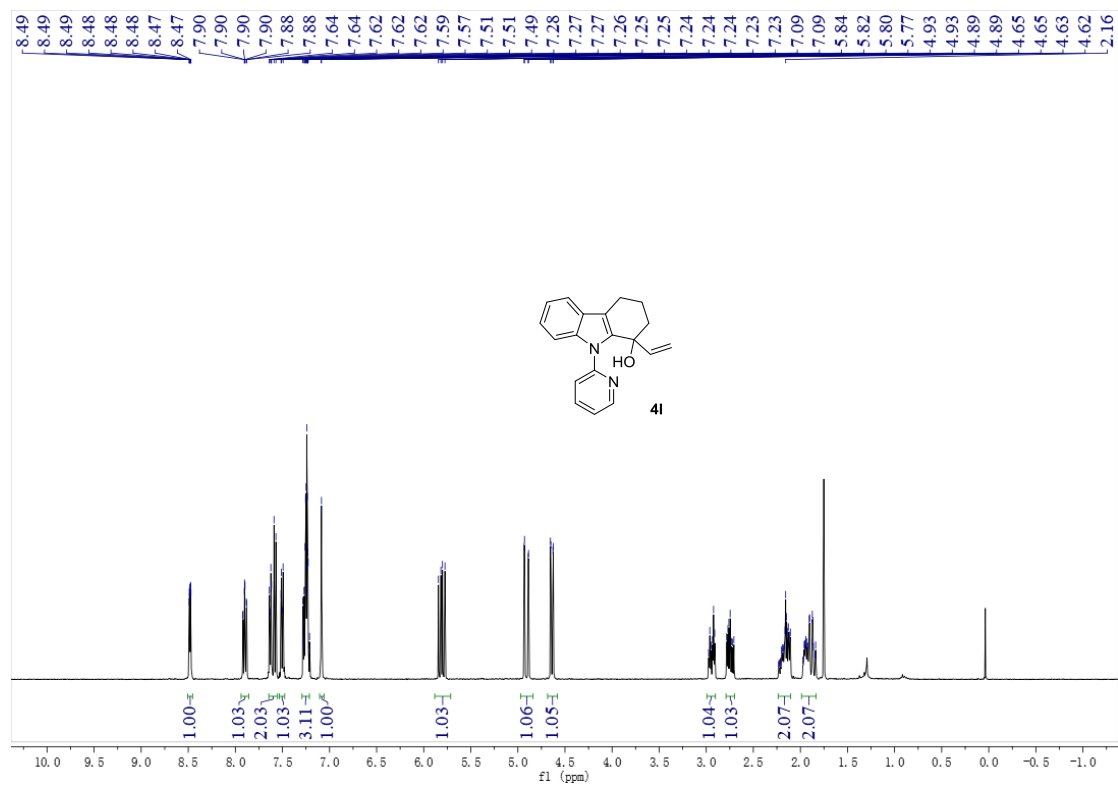

Supplementary Fig. 116 |  $^1\text{H}$  NMR (400 MHz) of compound 4l (using  $\text{CDCl}_3$  as solvent)

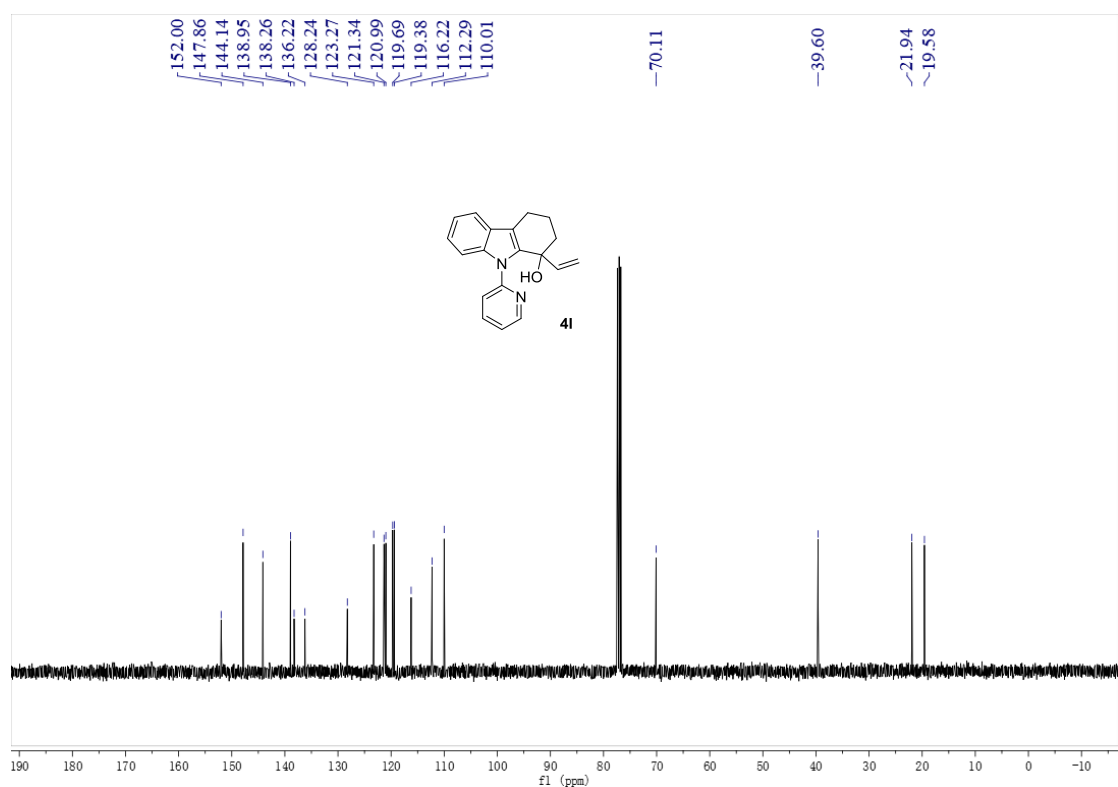

Supplementary Fig. 117 |  $^{13}\text{C}$  NMR (101 MHz) of compound 4l (using  $\text{CDCl}_3$  as solvent)

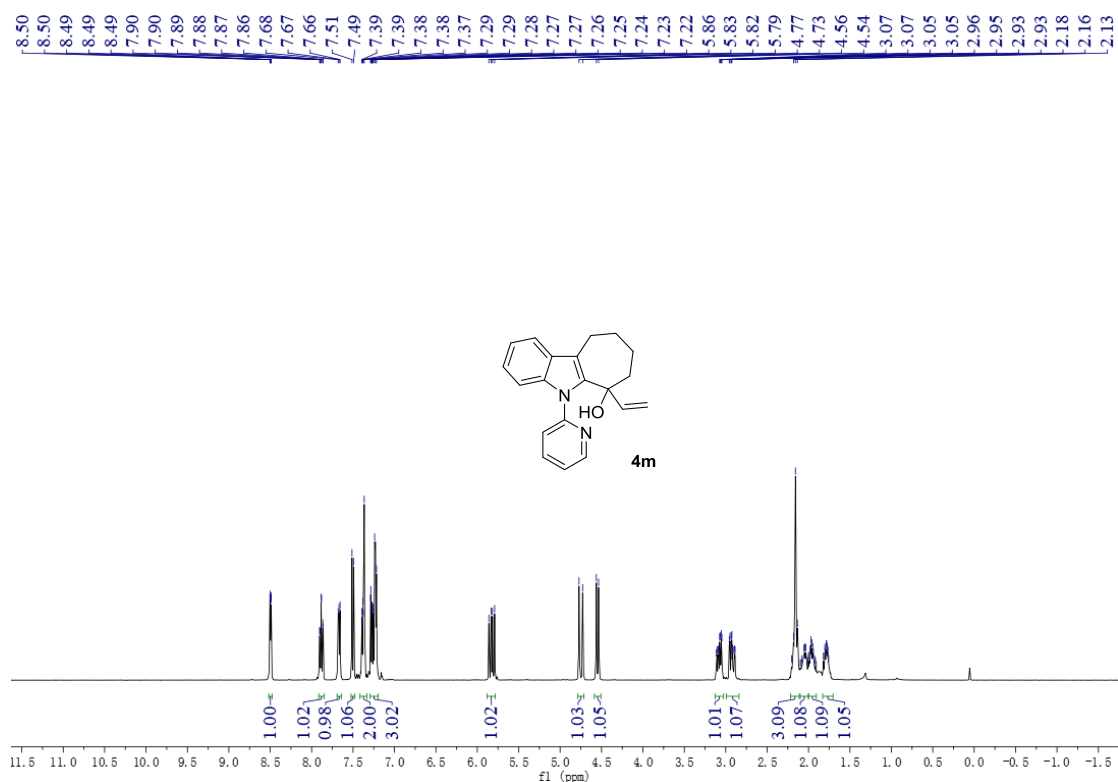

Supplementary Fig. 118 | <sup>1</sup>H NMR (400 MHz) of compound 4m (using CDCl<sub>3</sub> as solvent)

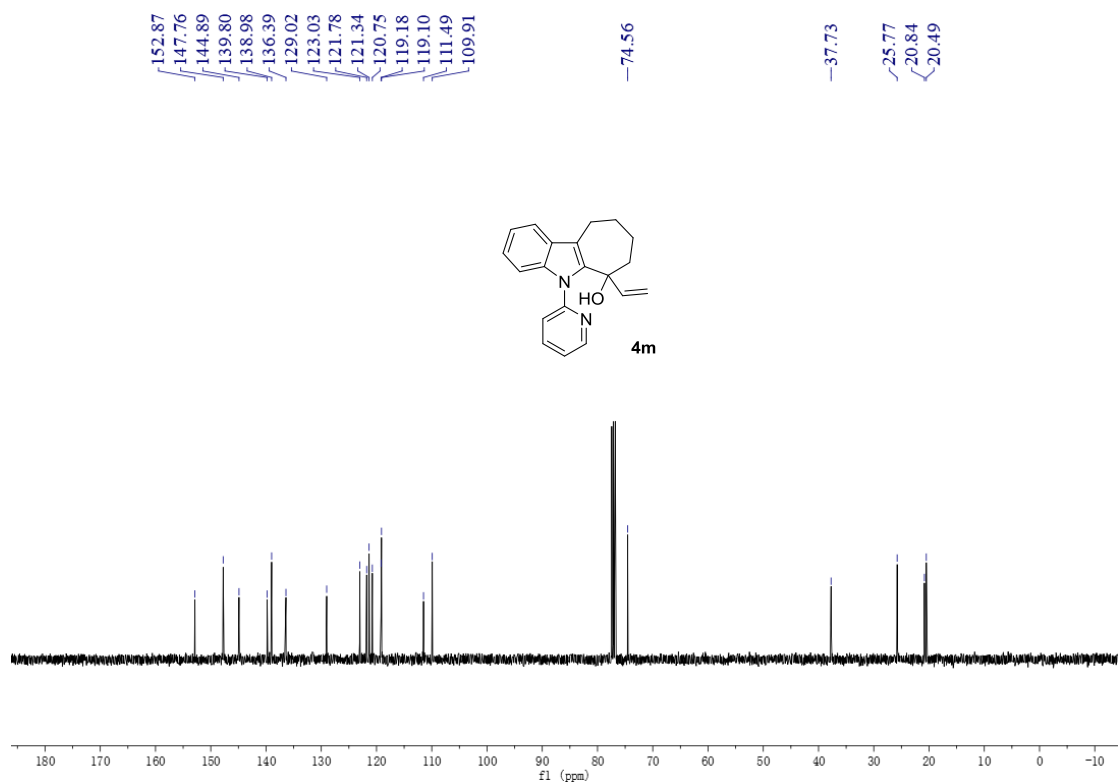

Supplementary Fig. 119 | <sup>13</sup>C NMR (101 MHz) of compound 4m (using CDCl<sub>3</sub> as solvent)

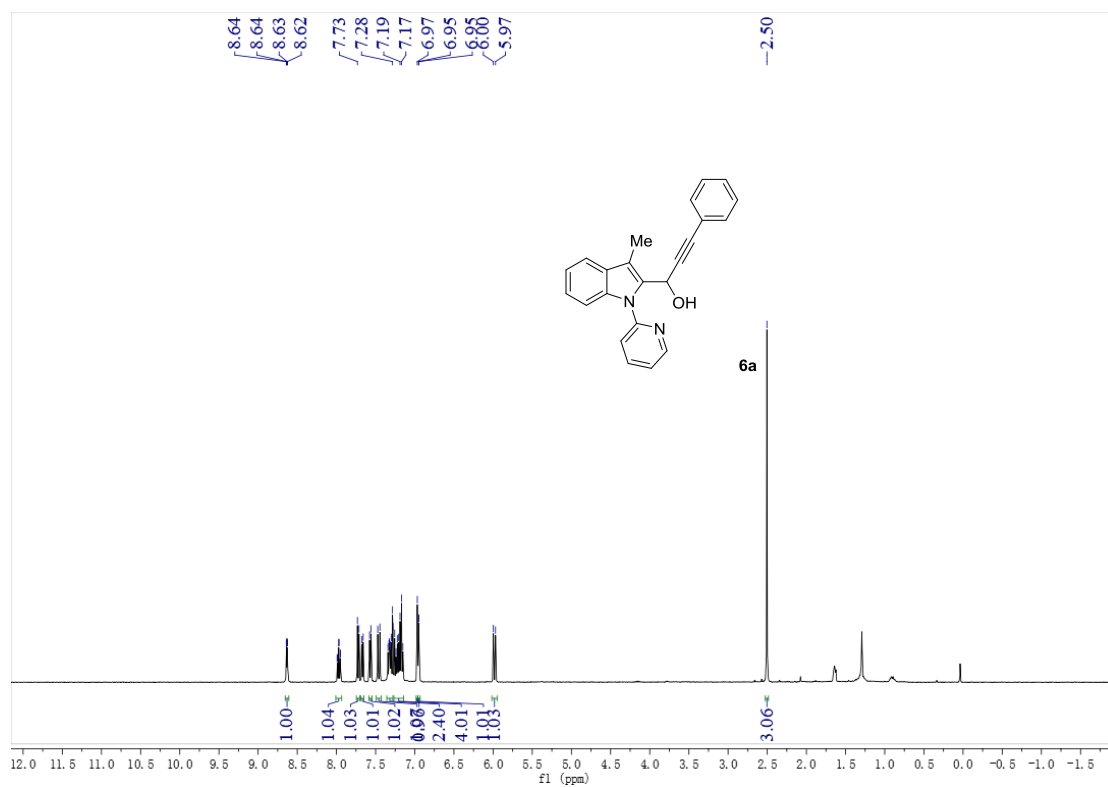

Supplementary Fig. 120 | <sup>1</sup>H NMR (400 MHz) of compound 6a (using CDCl<sub>3</sub> as solvent)

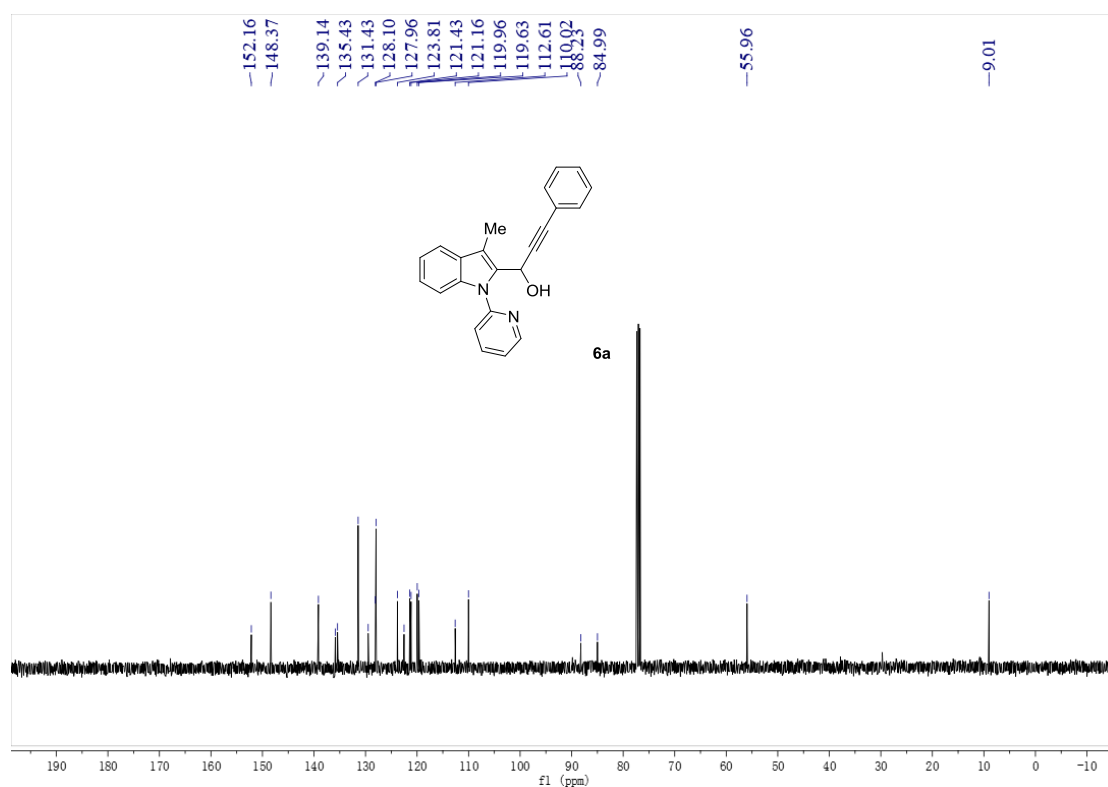

Supplementary Fig. 121 | <sup>13</sup>C NMR (101 MHz) of compound 6a (using CDCl<sub>3</sub> as solvent)

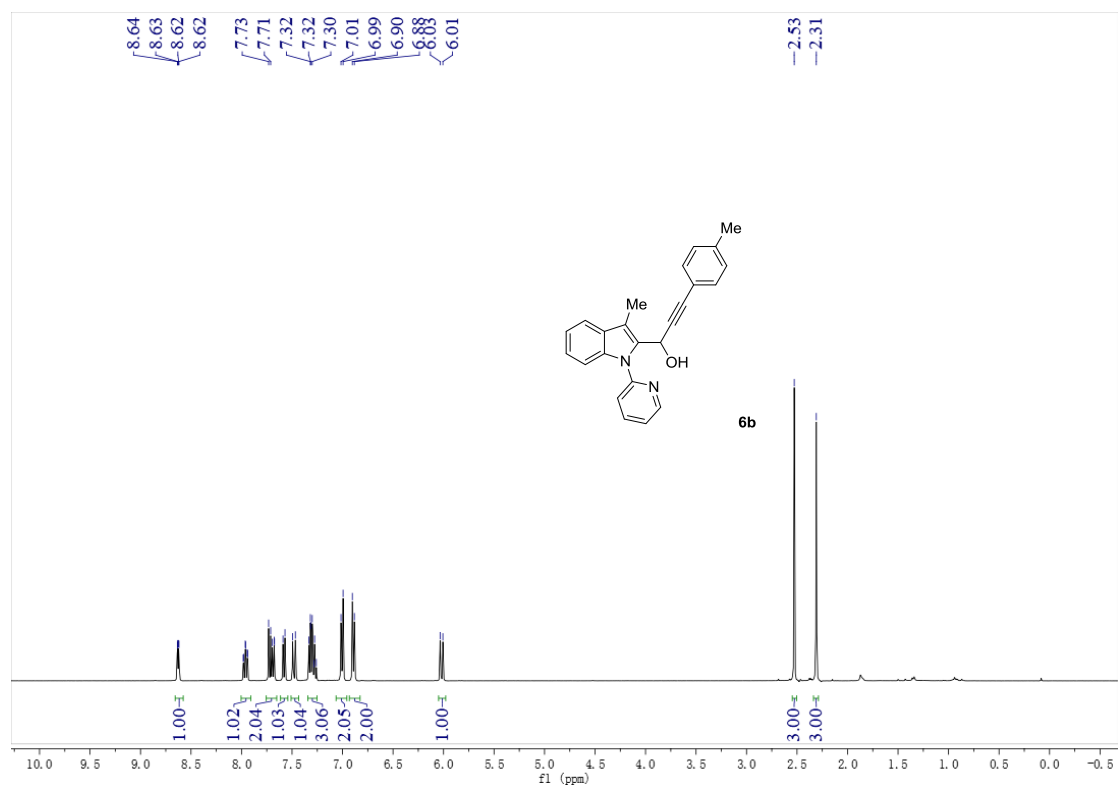

Supplementary Fig. 122 | <sup>1</sup>H NMR (400 MHz) of compound 6b (using CDCl<sub>3</sub> as solvent)

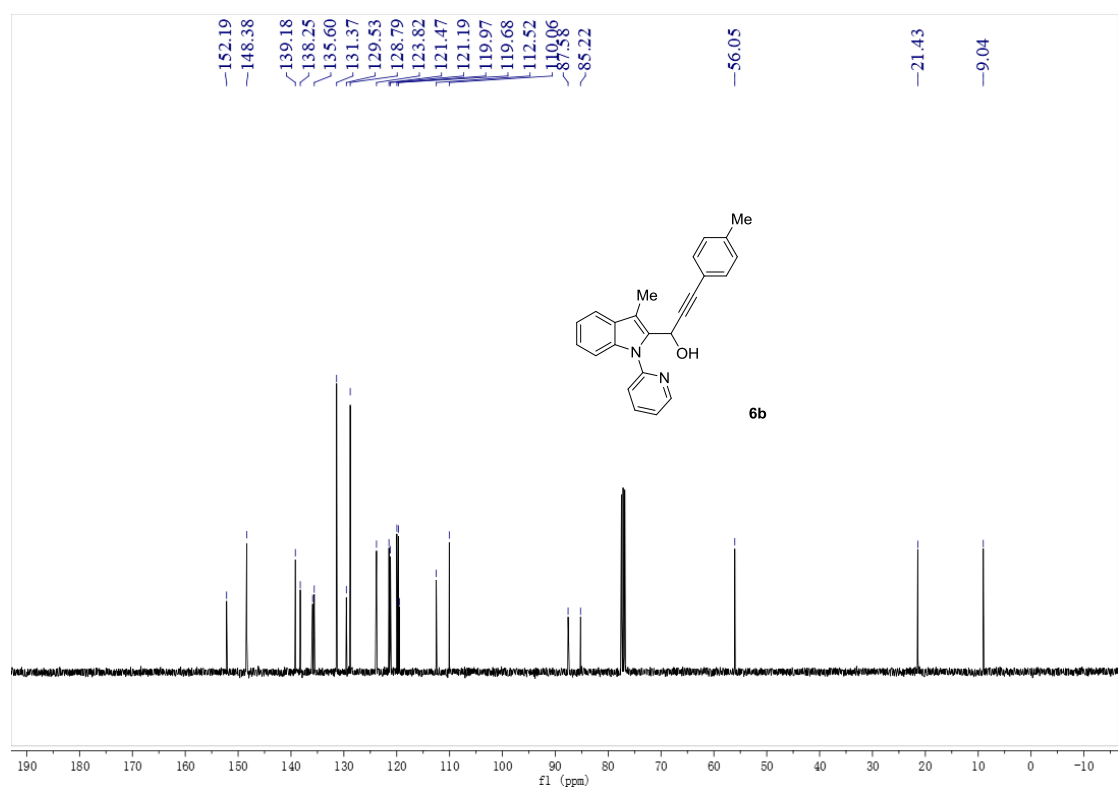

Supplementary Fig. 123 | <sup>13</sup>C NMR (101 MHz) of compound 6b (using CDCl<sub>3</sub> as solvent)



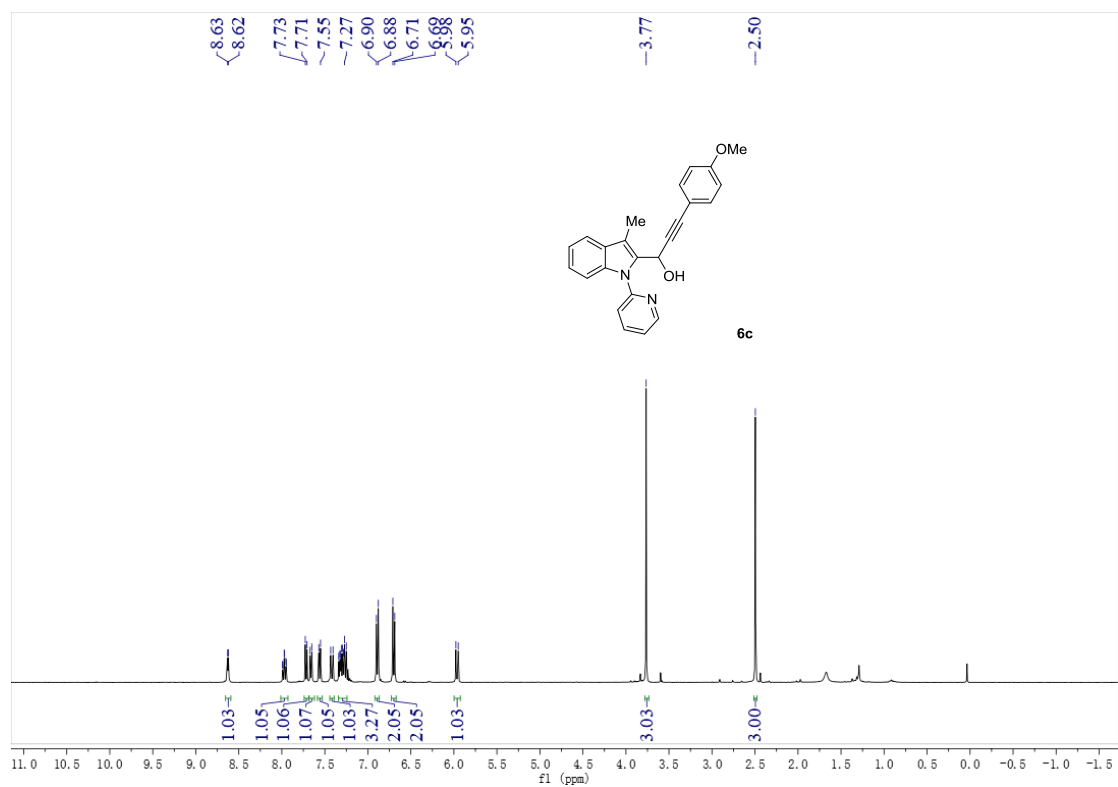

Supplementary Fig. 124 | <sup>1</sup>H NMR (400 MHz) of compound 6c (using CDCl<sub>3</sub> as solvent)

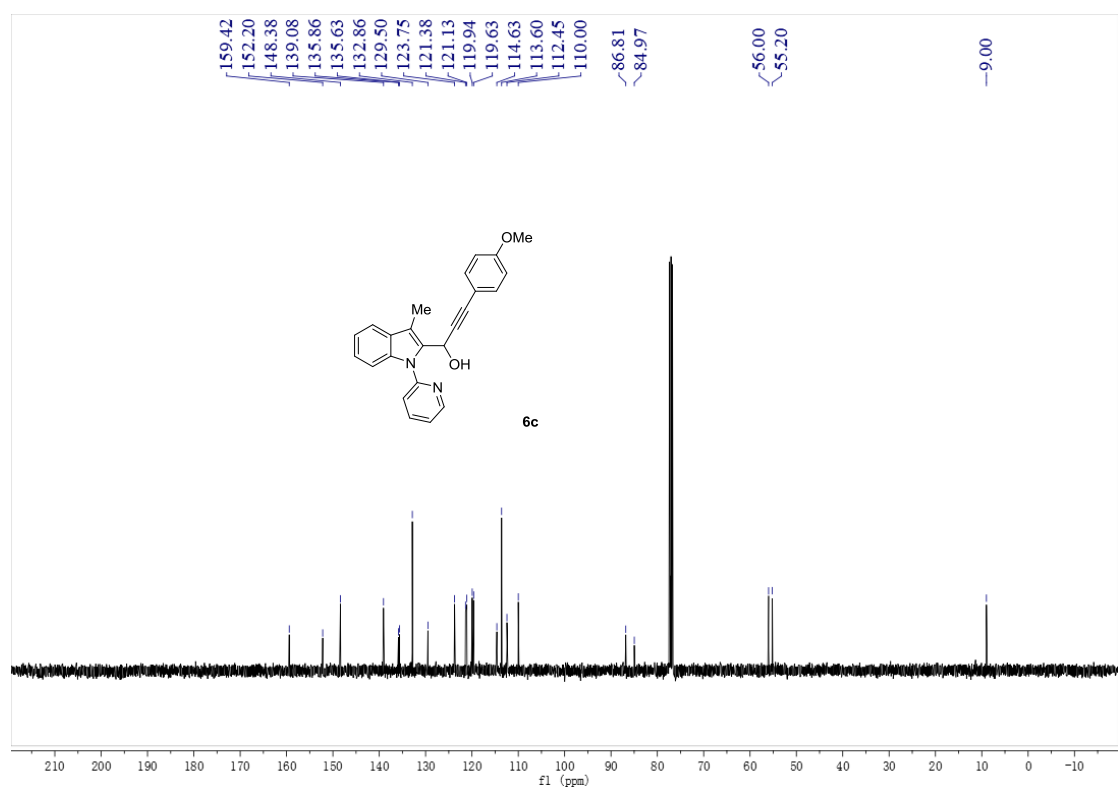

Supplementary Fig. 125 | <sup>13</sup>C NMR (101 MHz) of compound 6c (using CDCl<sub>3</sub> as solvent)

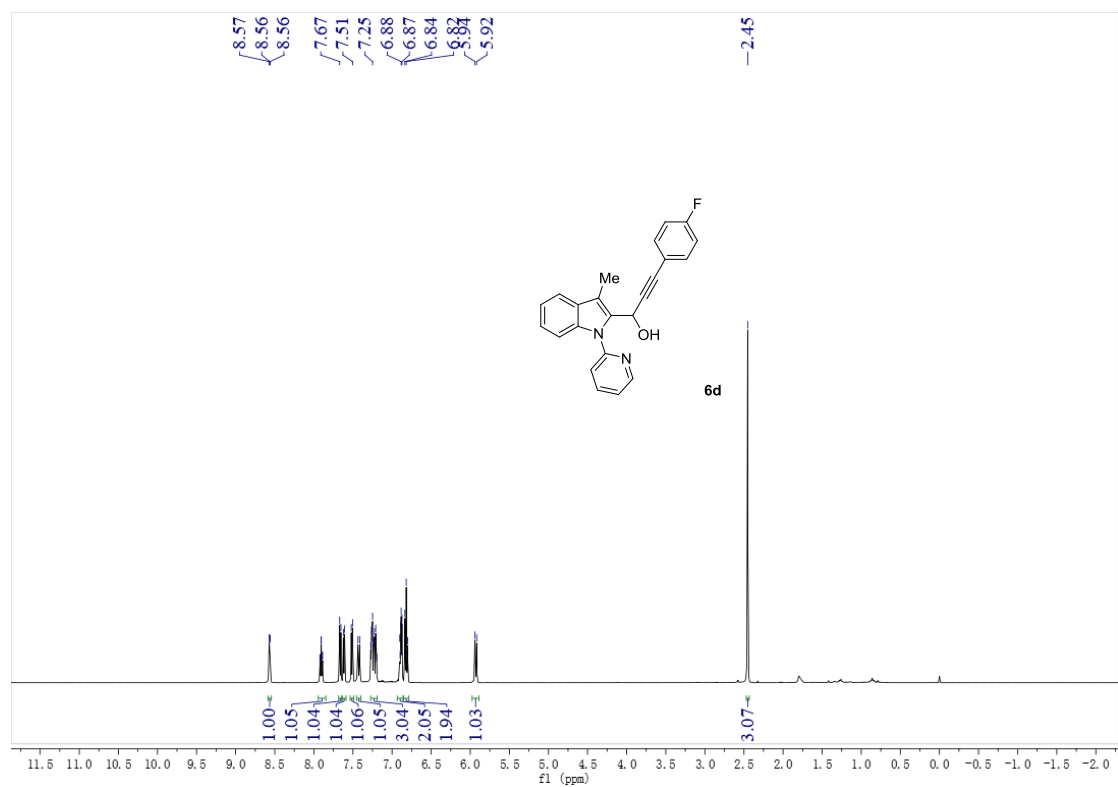

Supplementary Fig. 126 | <sup>1</sup>H NMR (500 MHz) of compound 6d (using CDCl<sub>3</sub> as solvent)

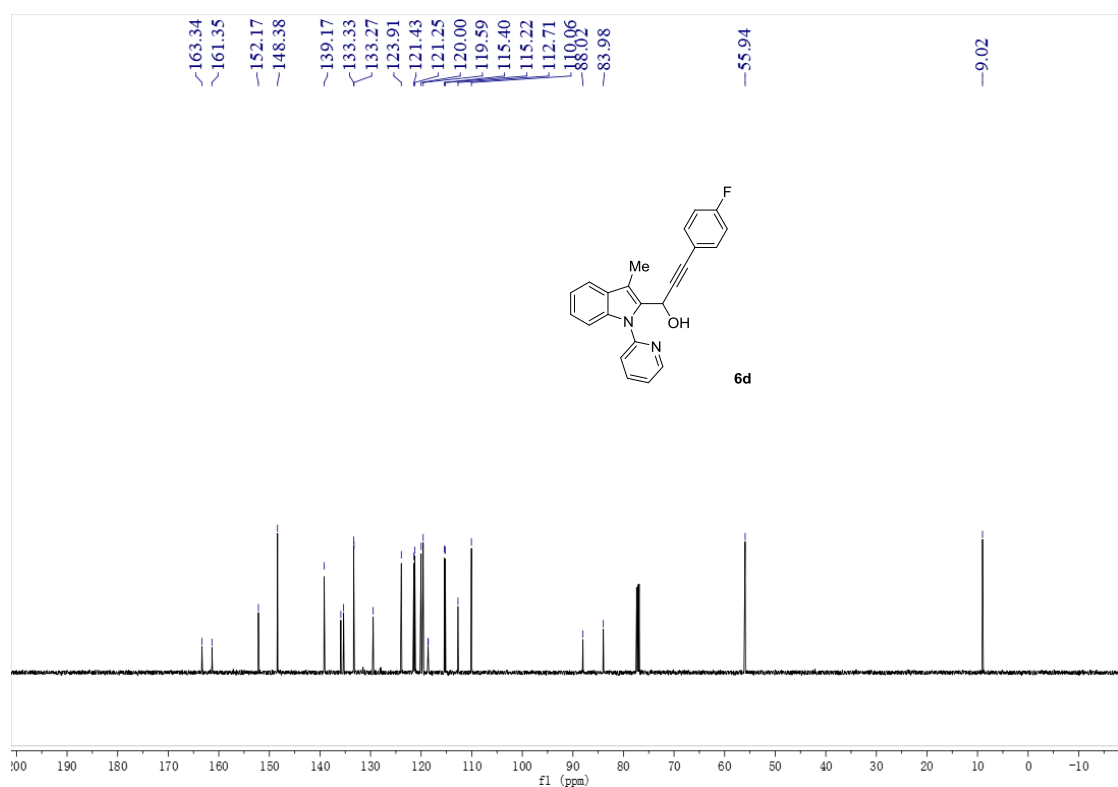

Supplementary Fig. 127 | <sup>13</sup>C NMR (126 MHz) of compound 6d (using CDCl<sub>3</sub> as solvent)

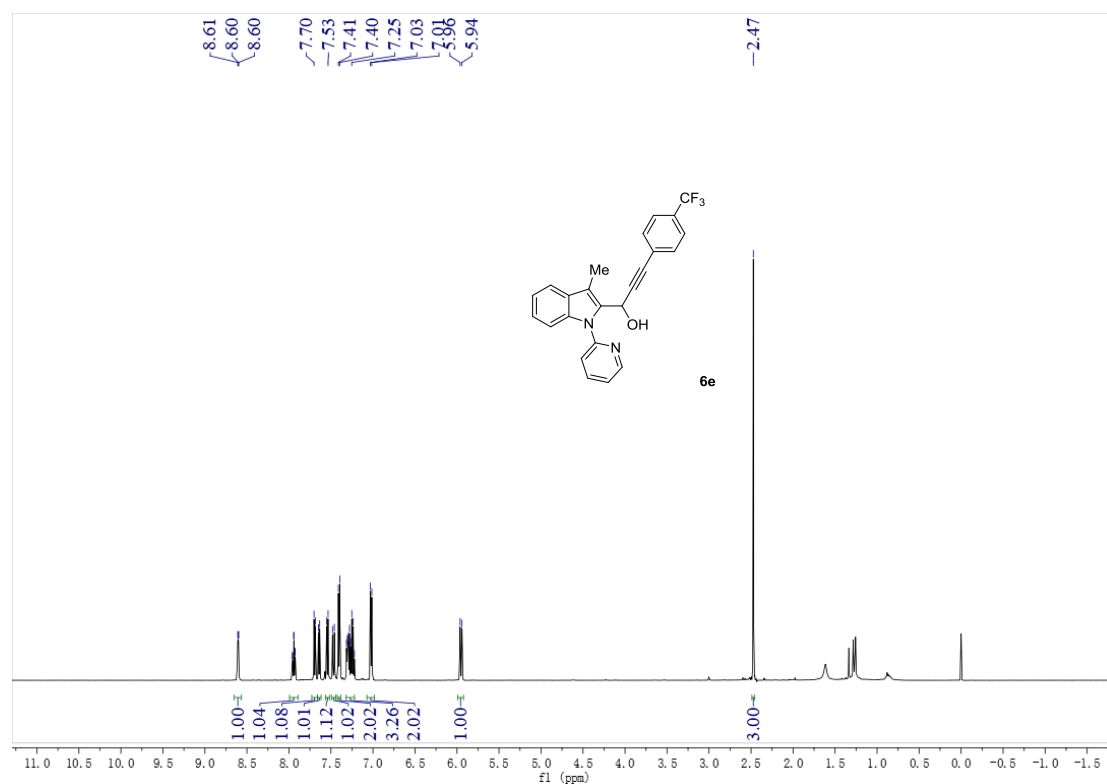

**Supplementary Fig. 128 | <sup>1</sup>H NMR (500 MHz) of compound 6e (using CDCl<sub>3</sub> as solvent)**

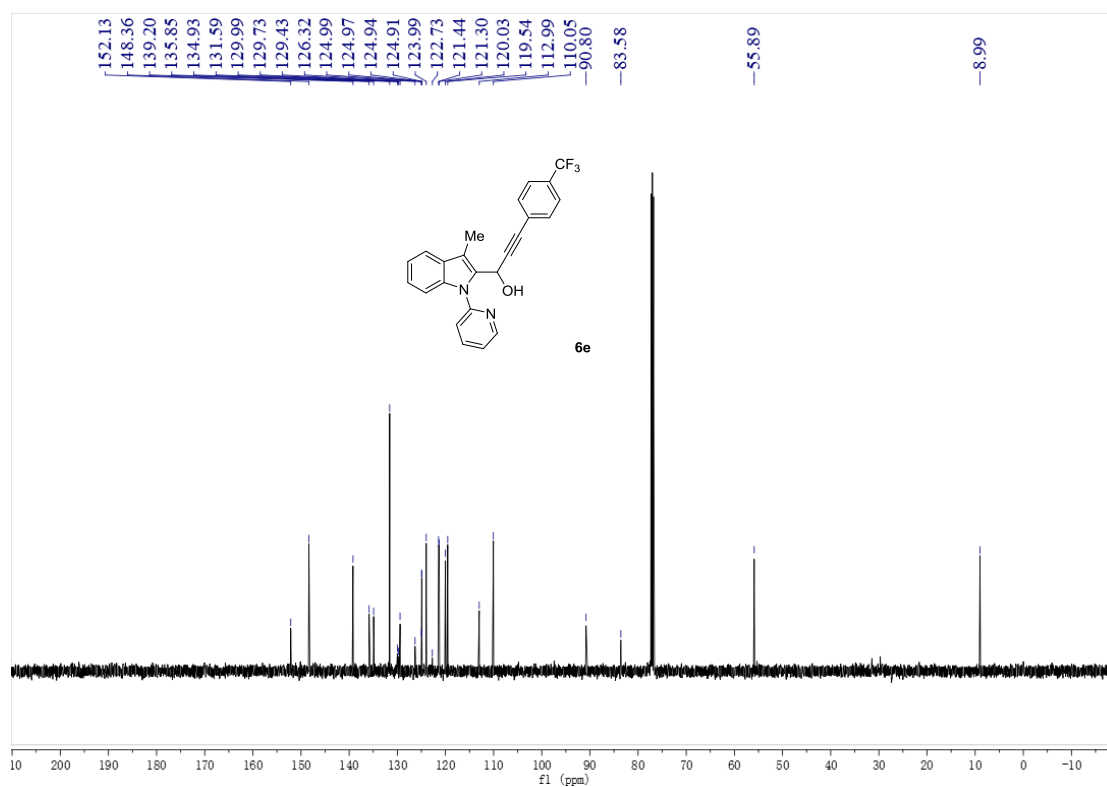

**Supplementary Fig. 129 | <sup>13</sup>C NMR (126 MHz) of compound 6e (using CDCl<sub>3</sub> as solvent)**

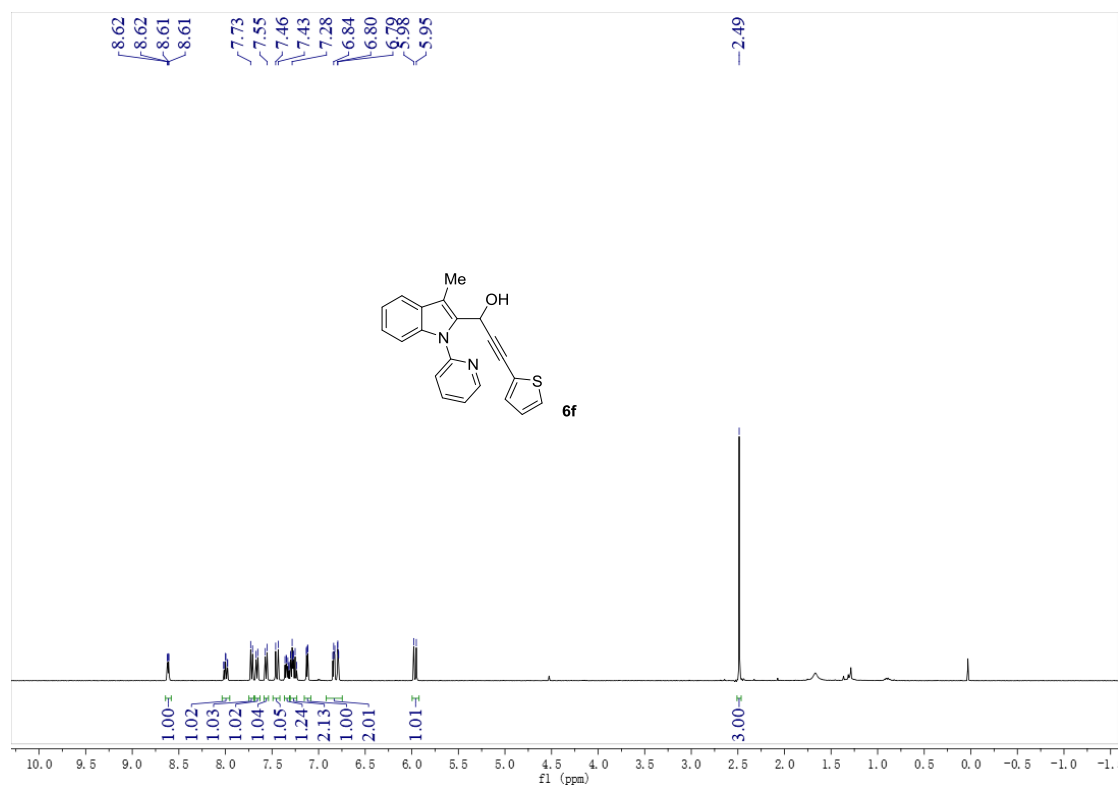

Supplementary Fig. 130 | <sup>1</sup>H NMR (400 MHz) of compound 6f (using CDCl<sub>3</sub> as solvent)

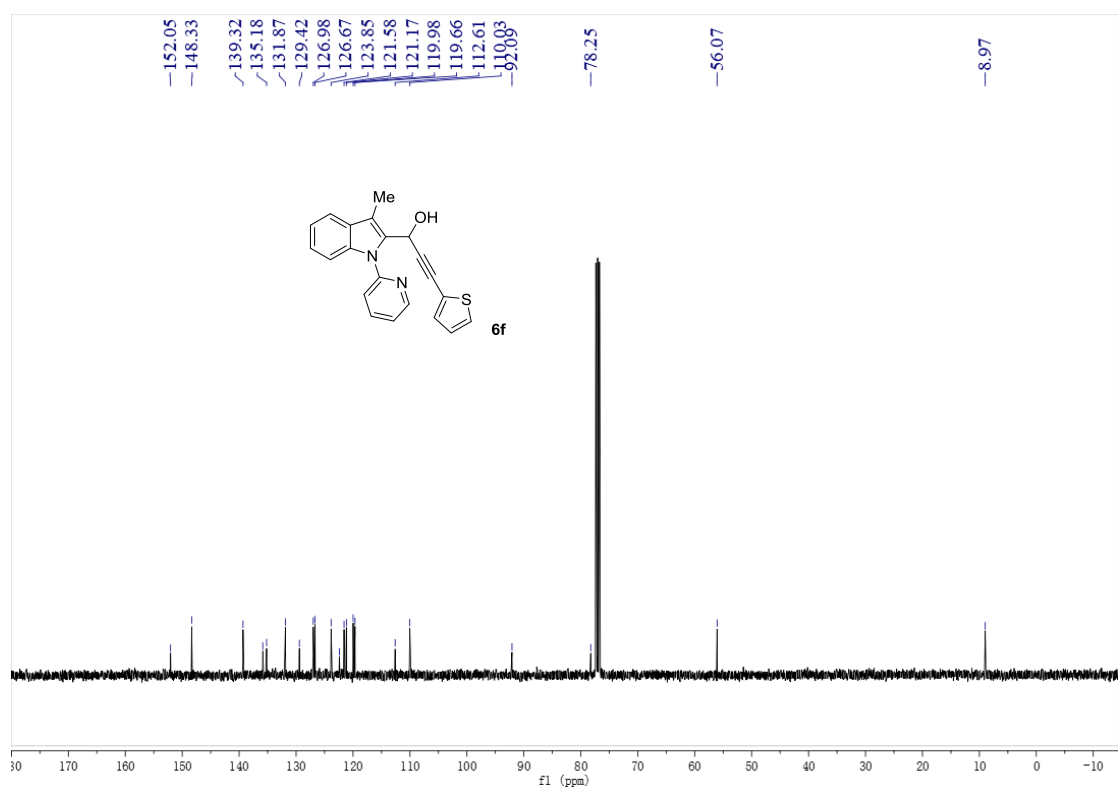

Supplementary Fig. 131 | <sup>13</sup>C NMR (101 MHz) of compound 6f (using CDCl<sub>3</sub> as solvent)

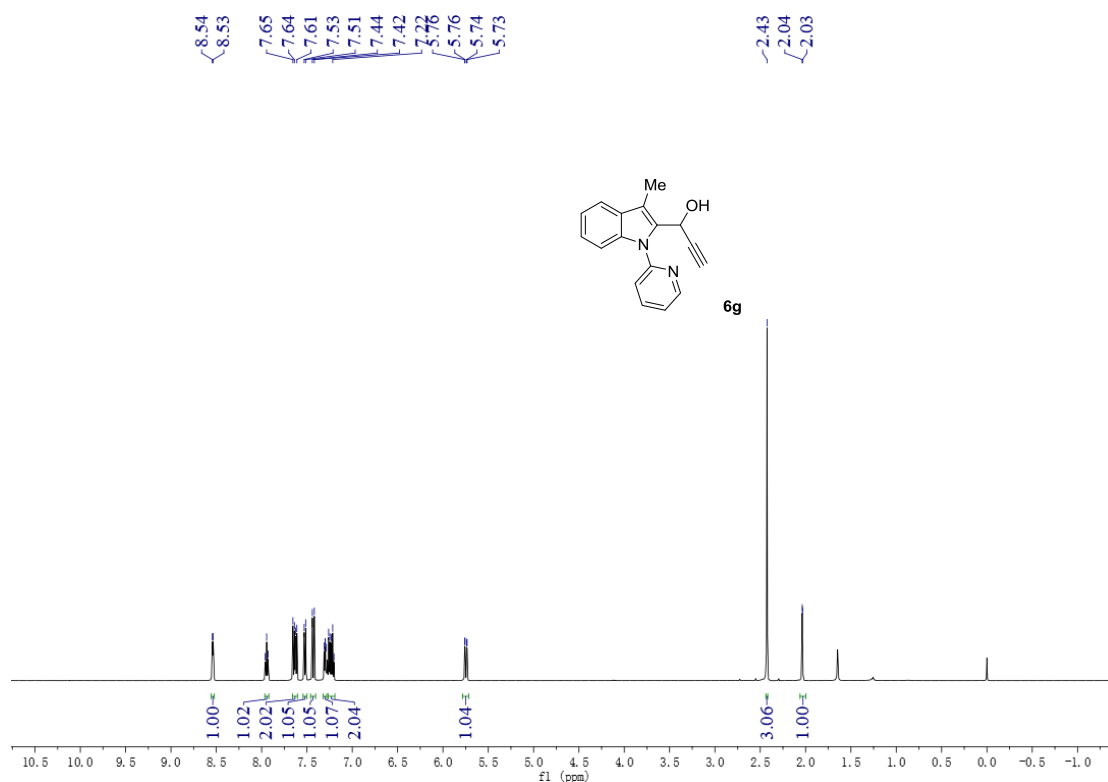

Supplementary Fig. 132 | <sup>1</sup>H NMR (500 MHz) of compound 6g (using CDCl<sub>3</sub> as solvent)

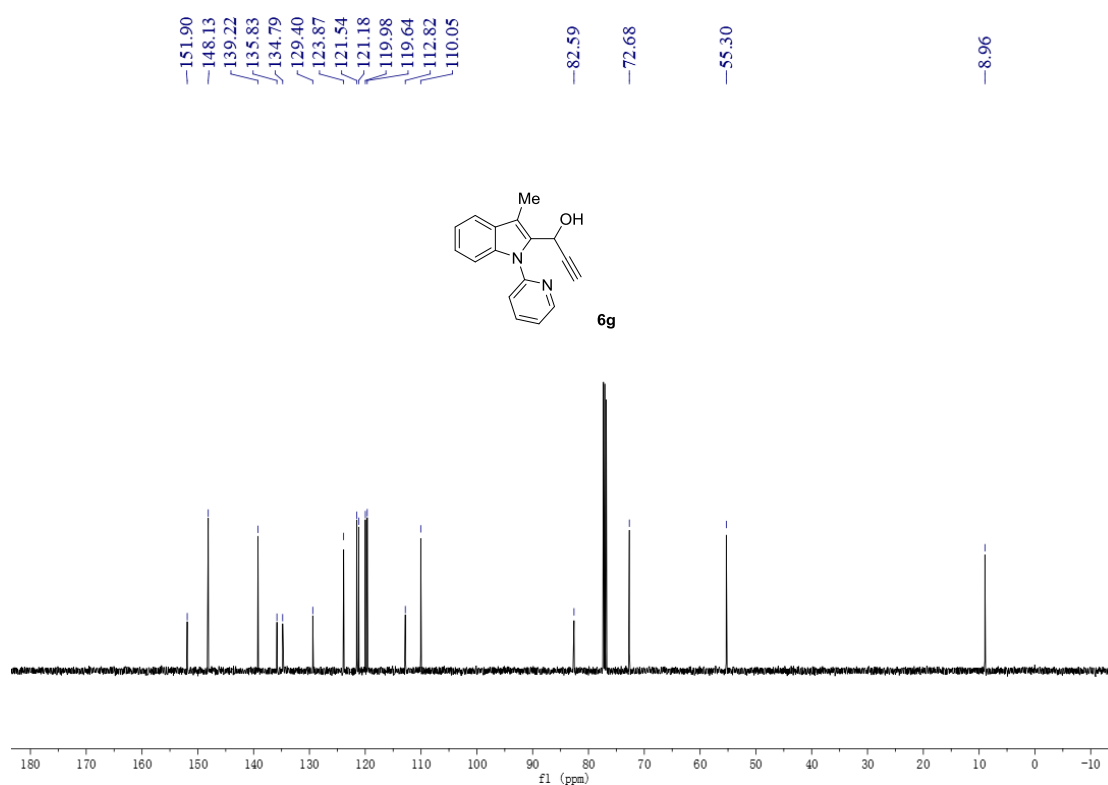

Supplementary Fig. 133 | <sup>13</sup>C NMR (126 MHz) of compound 6g (using CDCl<sub>3</sub> as solvent)

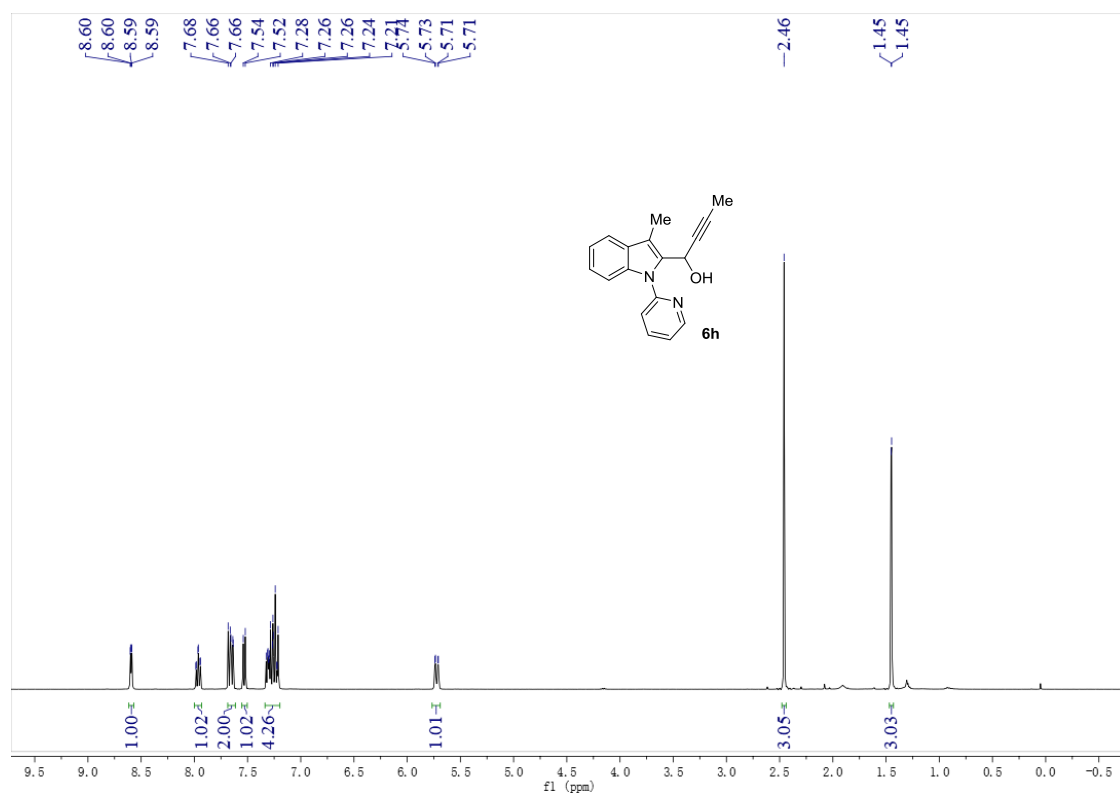

**Supplementary Fig. 134 | <sup>1</sup>H NMR (400 MHz) of compound 6h (using CDCl<sub>3</sub> as solvent)**

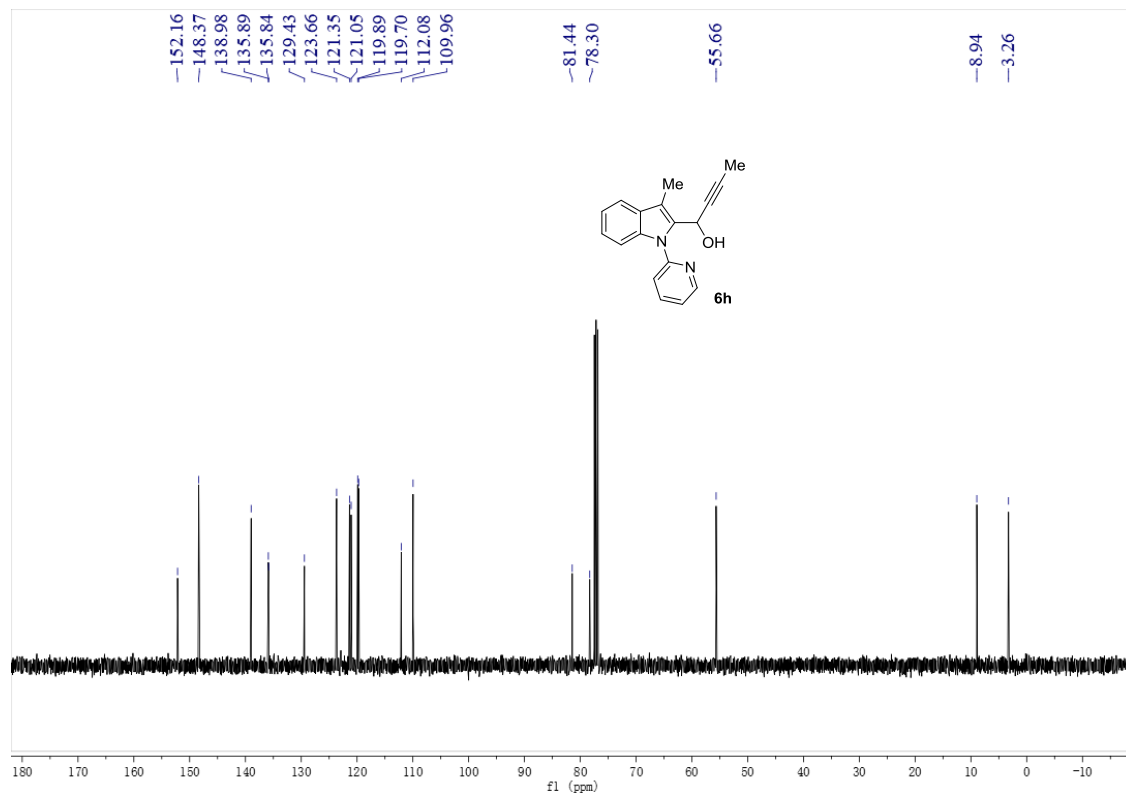

**Supplementary Fig. 135 | <sup>13</sup>C NMR (101 MHz) of compound 6h (using CDCl<sub>3</sub> as solvent)**

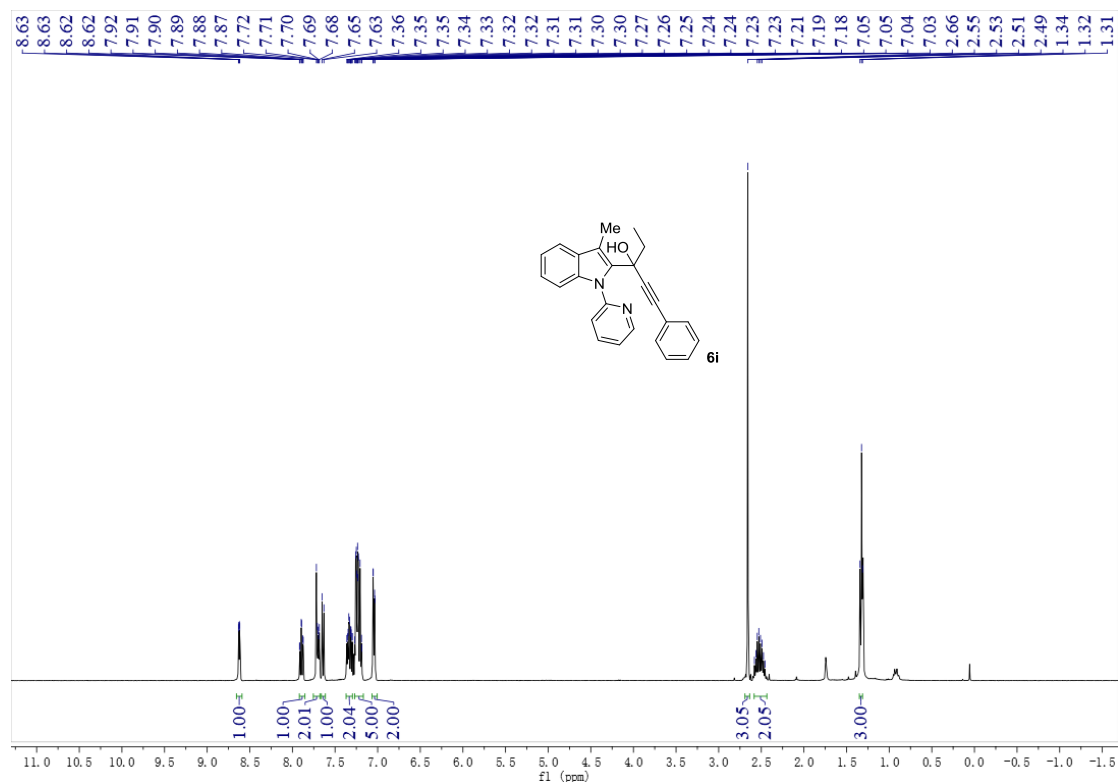

Supplementary Fig. 136 | <sup>1</sup>H NMR (400 MHz) of compound 6i (using CDCl<sub>3</sub> as solvent)

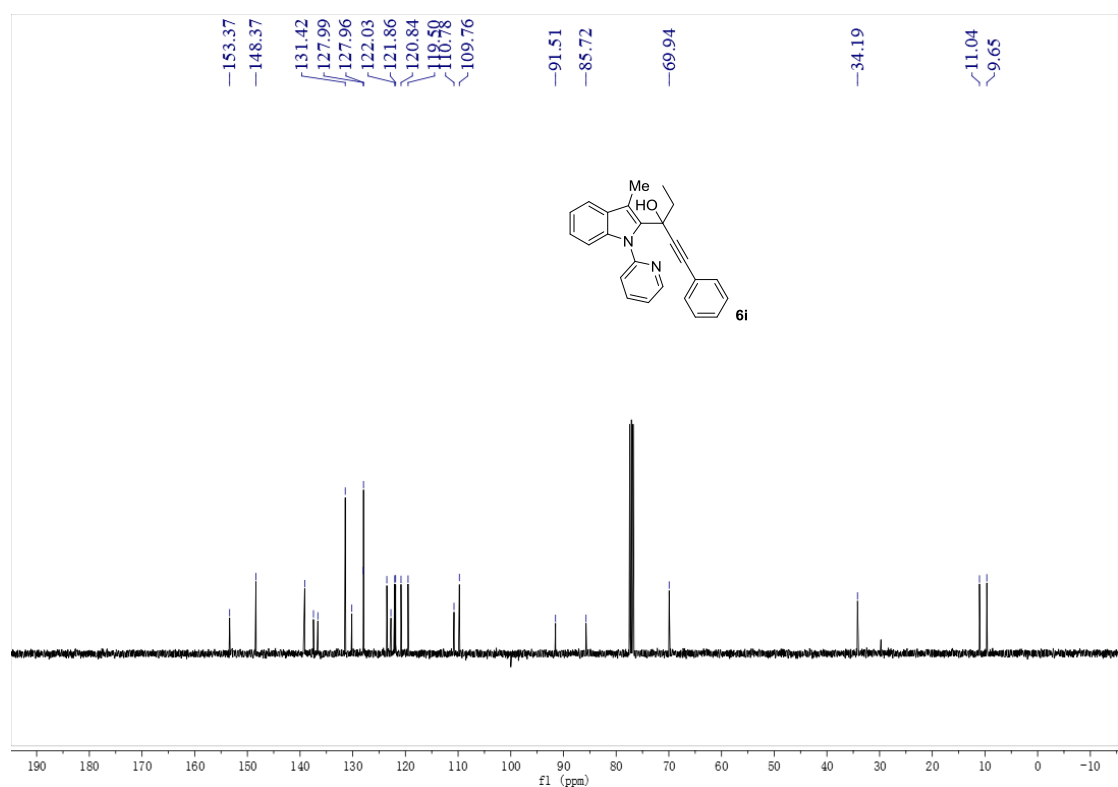

Supplementary Fig. 137 | <sup>13</sup>C NMR (101 MHz) of compound 6i (using CDCl<sub>3</sub> as solvent)

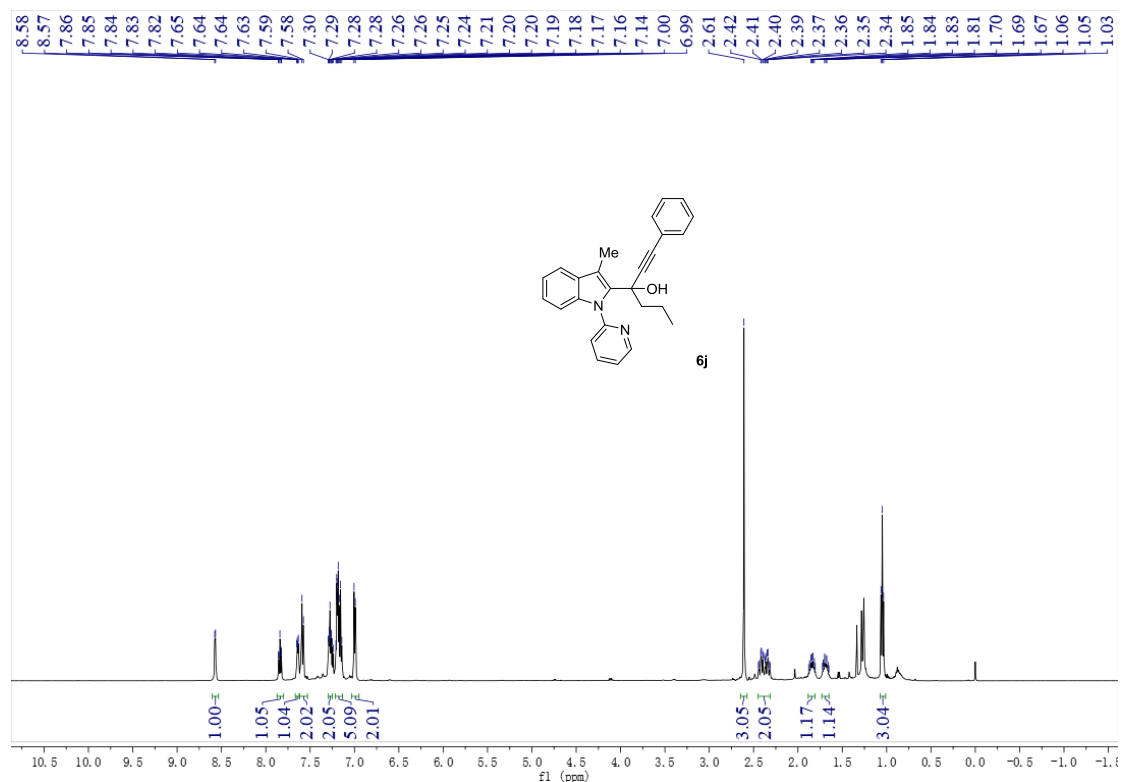

**Supplementary Fig. 138 | <sup>1</sup>H NMR (500 MHz) of compound 6j (using CDCl<sub>3</sub> as solvent)**

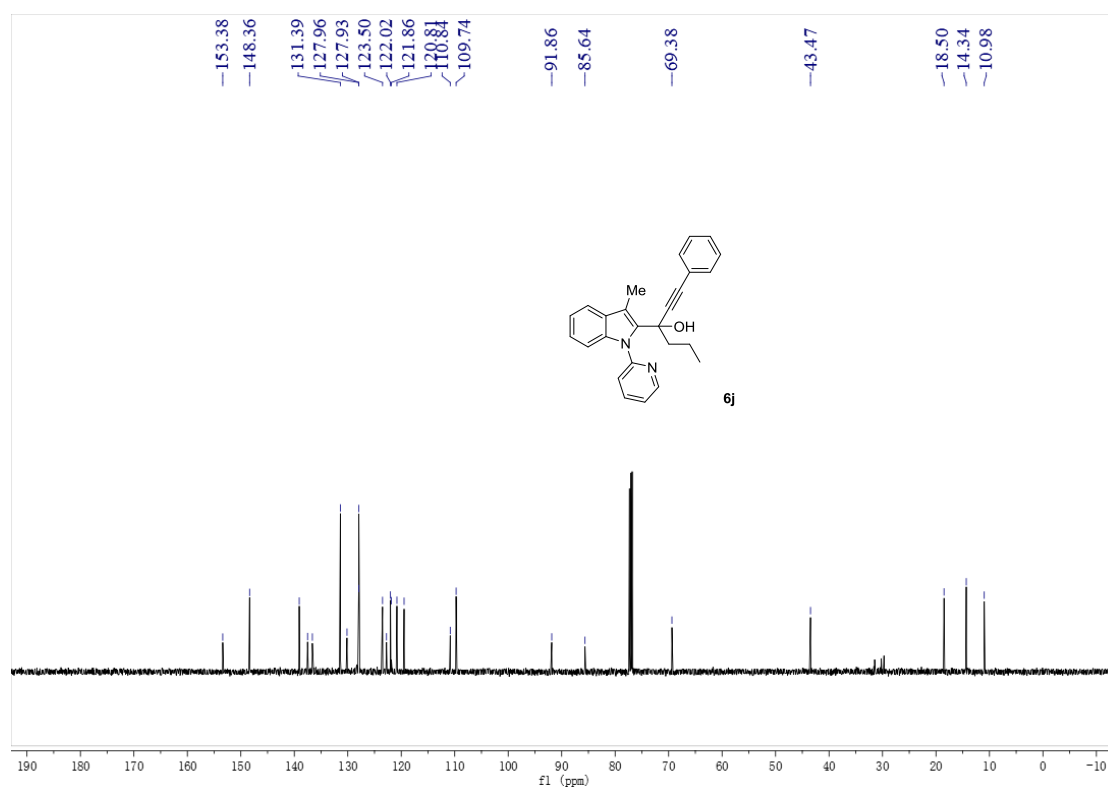

**Supplementary Fig. 139 | <sup>13</sup>C NMR (126 MHz) of compound 6j (using CDCl<sub>3</sub> as solvent)**



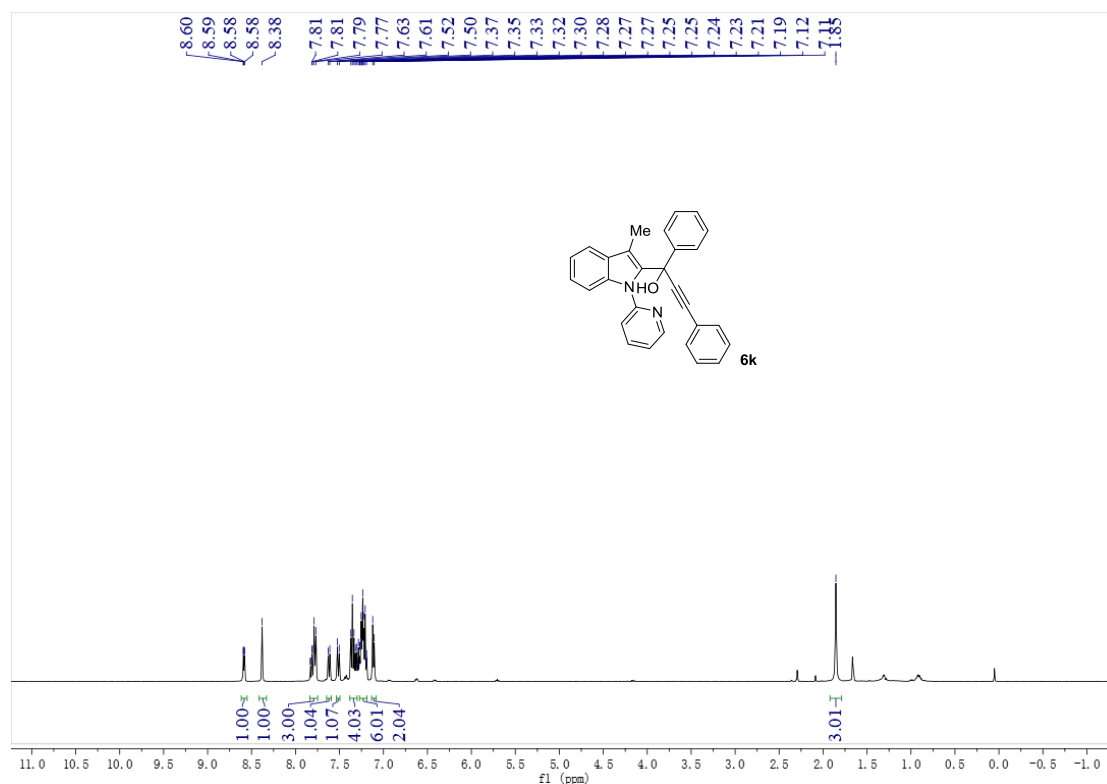

Supplementary Fig. 140 | <sup>1</sup>H NMR (500 MHz) of compound 6k (using CDCl<sub>3</sub> as solvent)

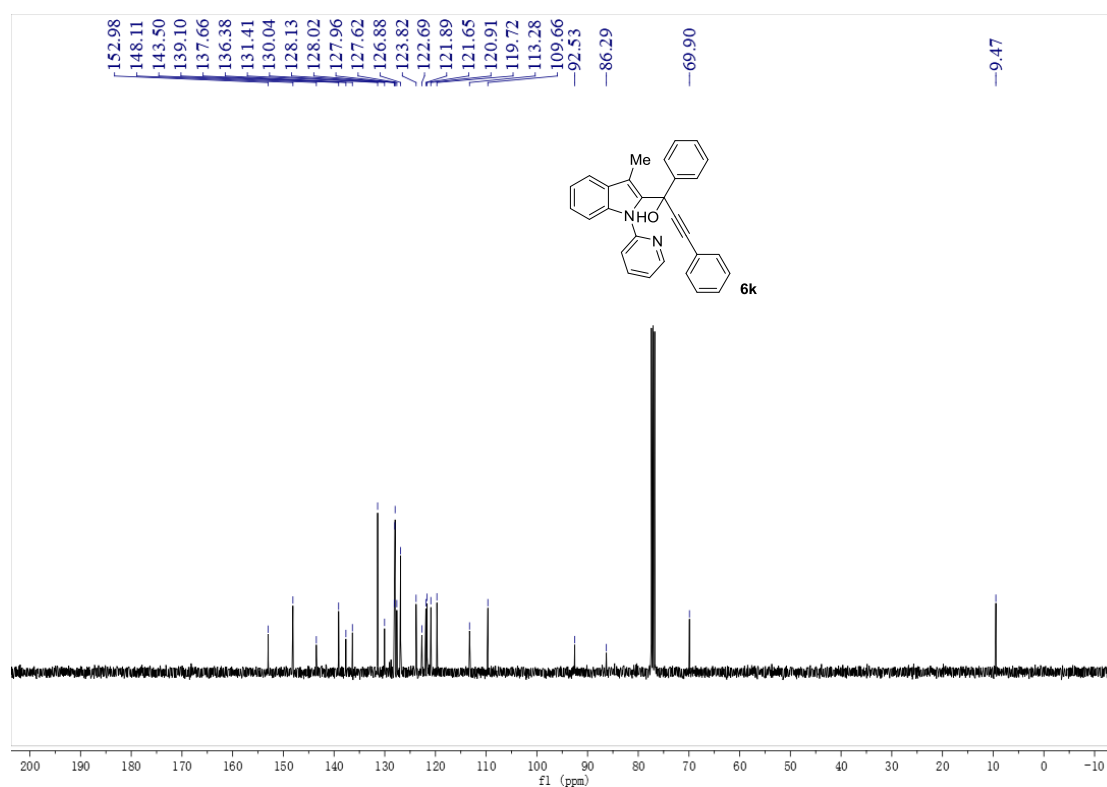

Supplementary Fig. 141 | <sup>13</sup>C NMR (126 MHz) of compound 6k (using CDCl<sub>3</sub> as solvent)

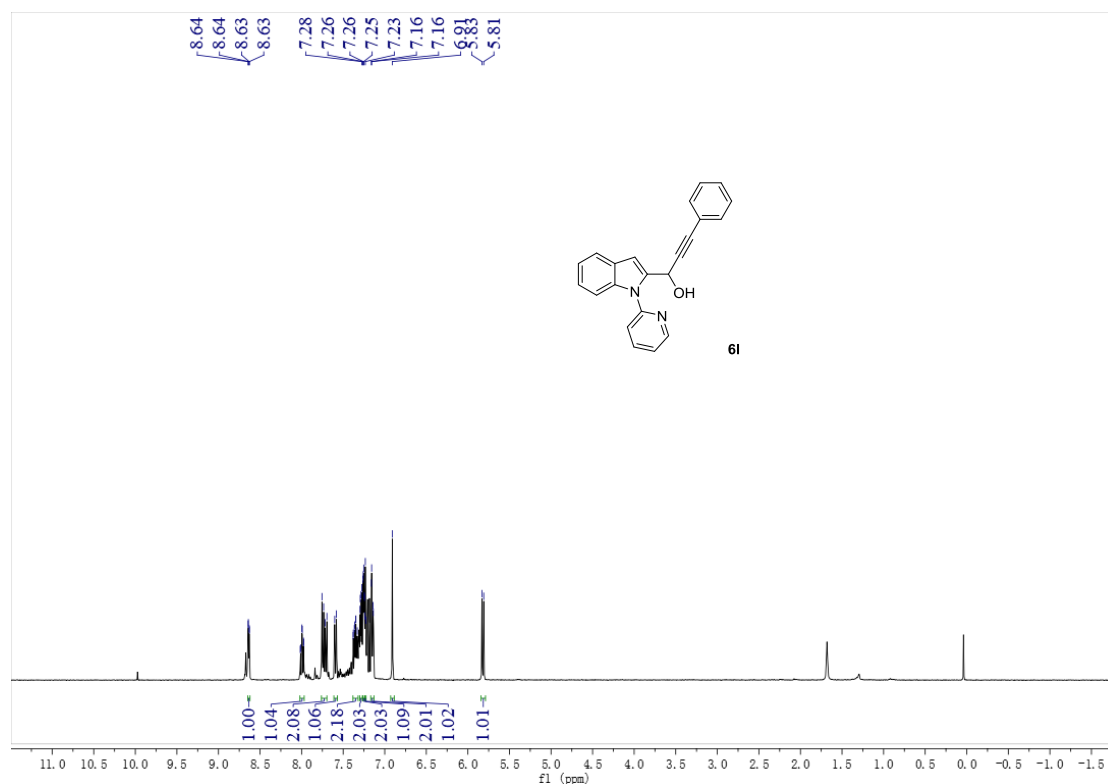

Supplementary Fig. 142 | <sup>1</sup>H NMR (400 MHz) of compound 6l (using CDCl<sub>3</sub> as solvent)

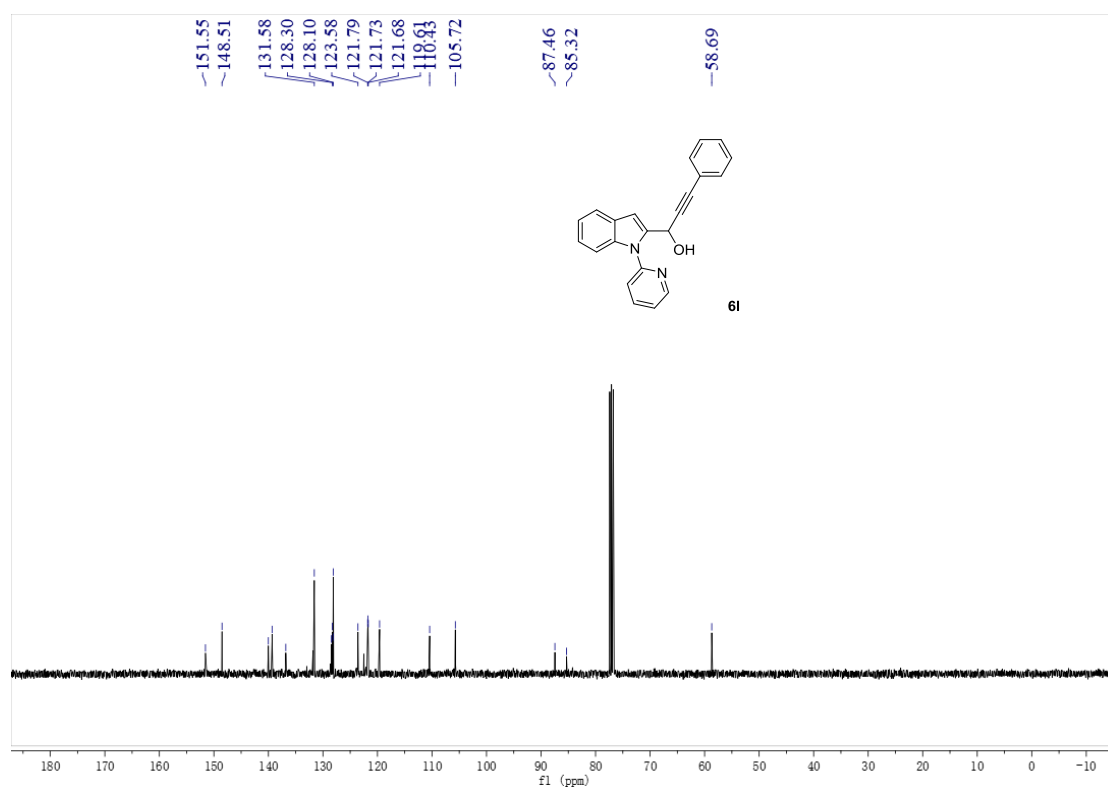

Supplementary Fig. 143 | <sup>13</sup>C NMR (101 MHz) of compound 6l (using CDCl<sub>3</sub> as solvent)

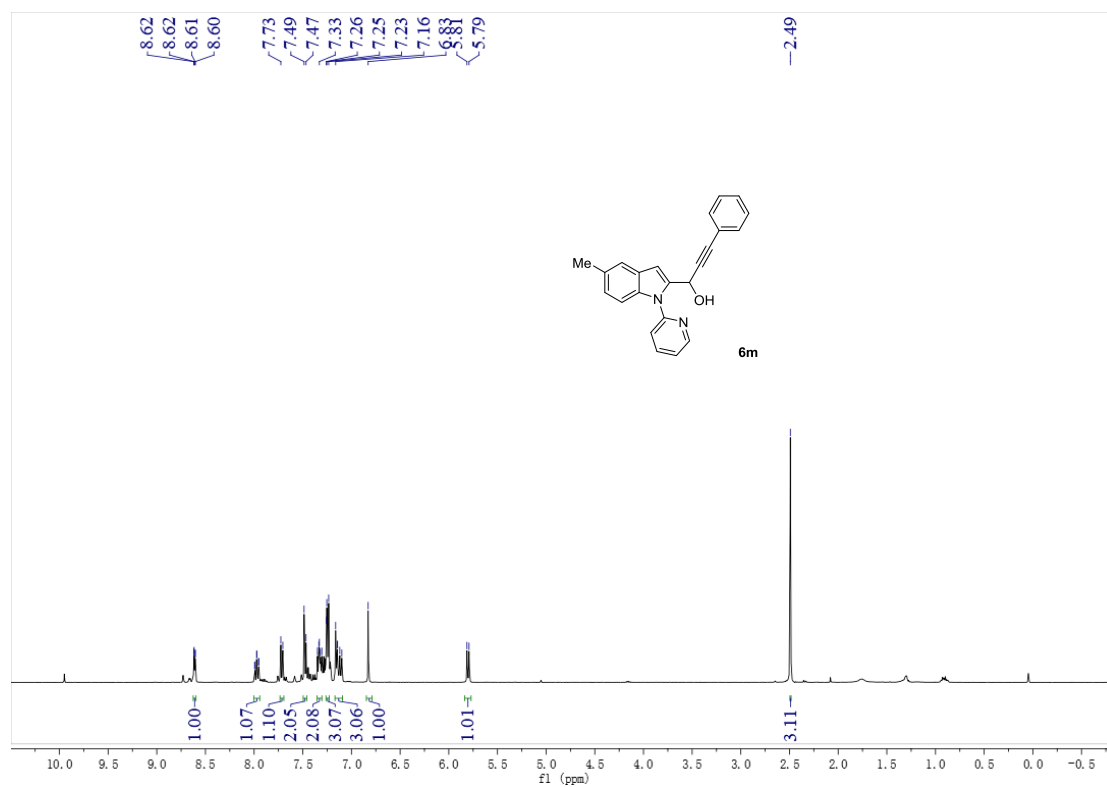

Supplementary Fig. 144 | <sup>1</sup>H NMR (400 MHz) of compound 6m (using CDCl<sub>3</sub> as solvent)

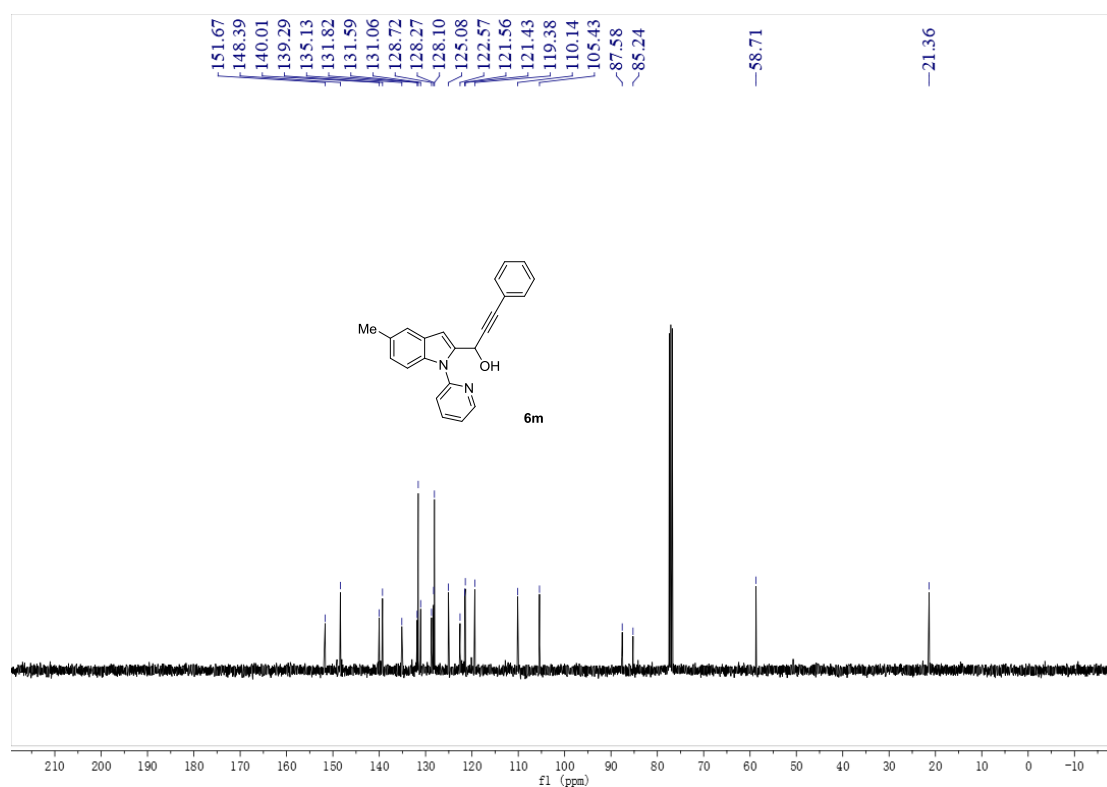

Supplementary Fig. 145 | <sup>13</sup>C NMR (101 MHz) of compound 6m (using CDCl<sub>3</sub> as solvent)

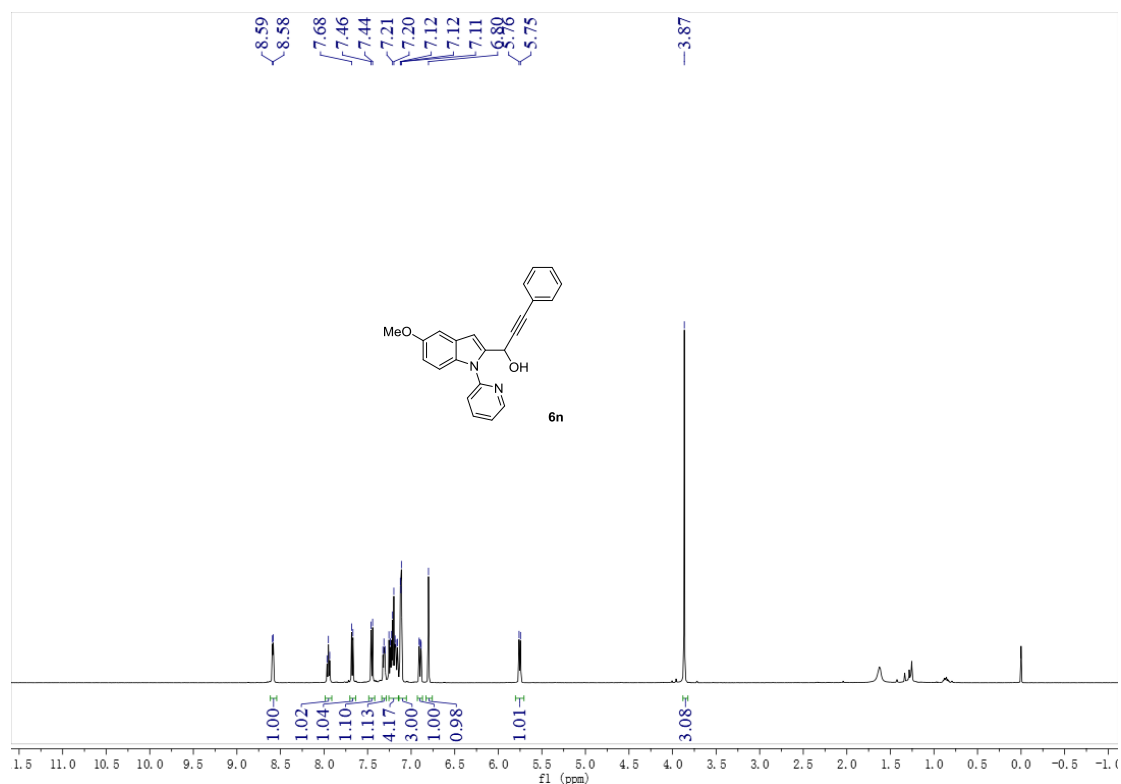

Supplementary Fig. 146 | <sup>1</sup>H NMR (500 MHz) of compound 6n (using CDCl<sub>3</sub> as solvent)

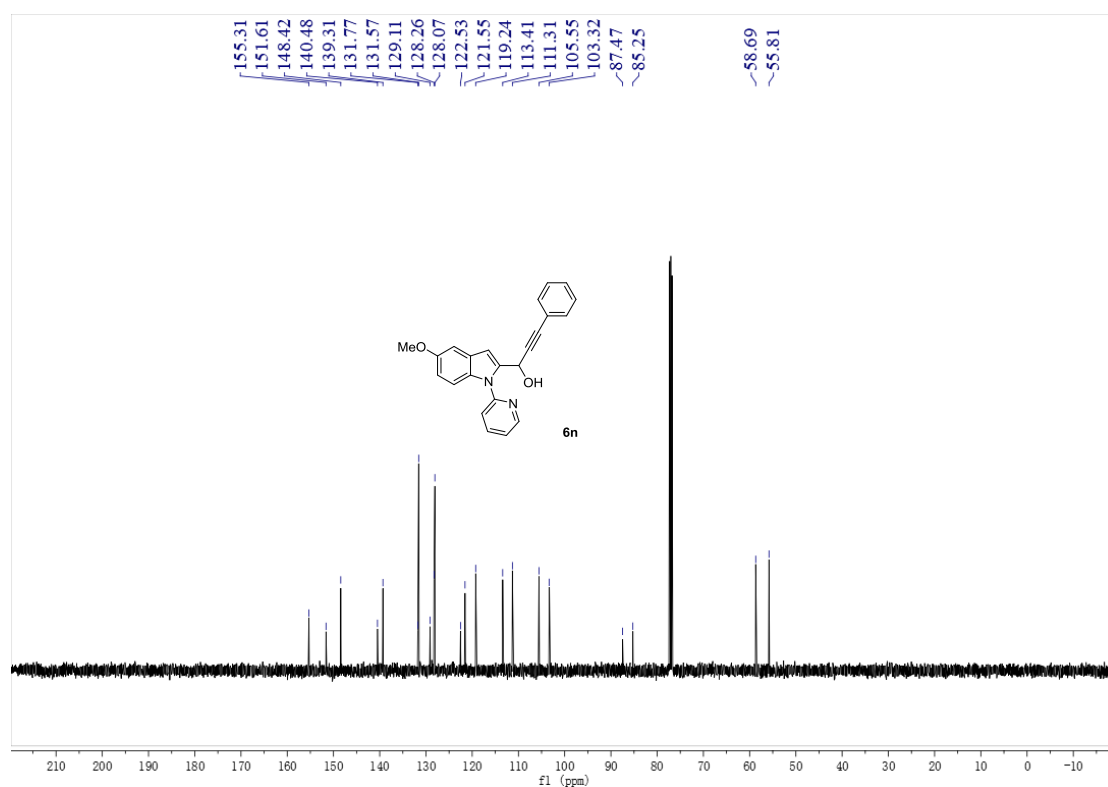

Supplementary Fig. 147 | <sup>13</sup>C NMR (126 MHz) of compound 6n (using CDCl<sub>3</sub> as solvent)

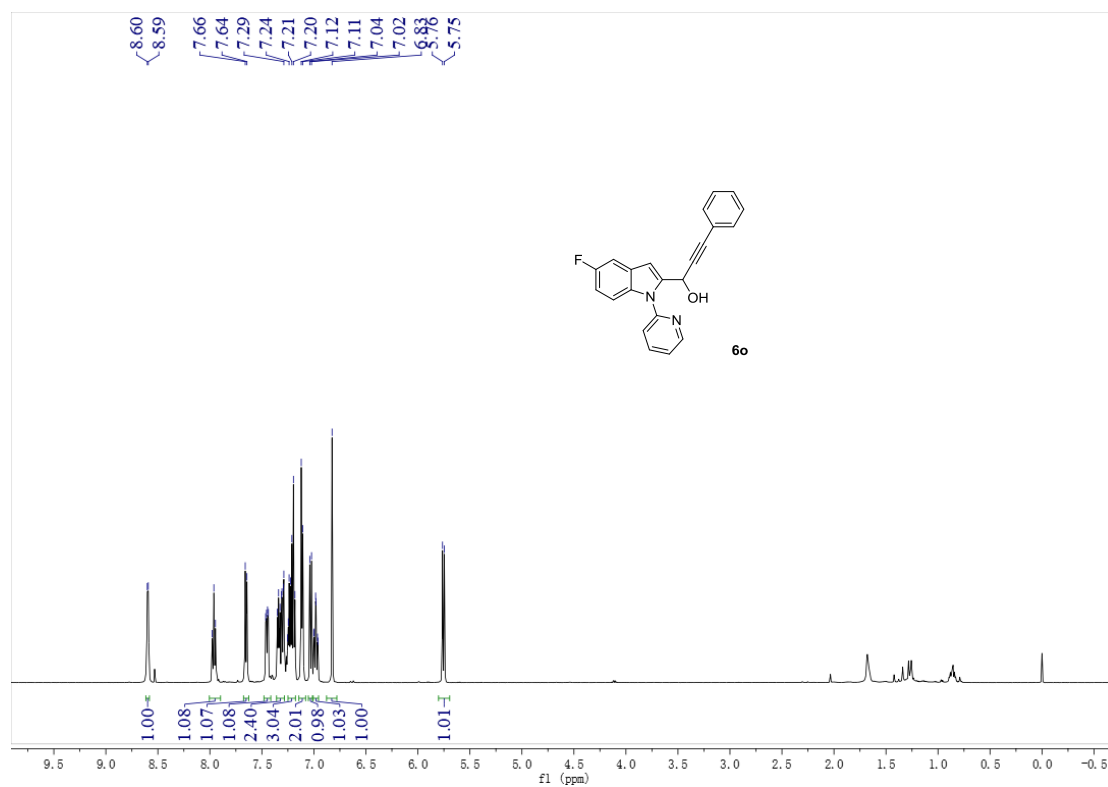

Supplementary Fig. 148 | <sup>1</sup>H NMR (500 MHz) of compound 6o (using CDCl<sub>3</sub> as solvent)

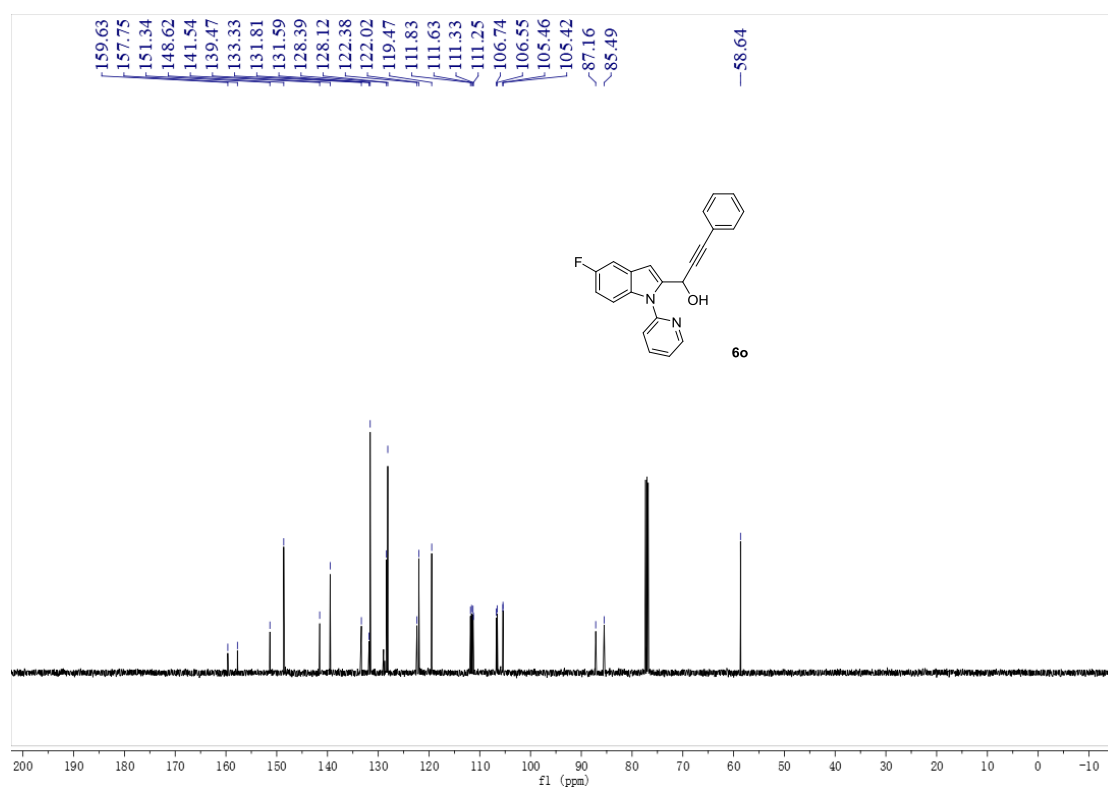

Supplementary Fig. 149 | <sup>13</sup>C NMR (126 MHz) of compound 6o (using CDCl<sub>3</sub> as solvent)

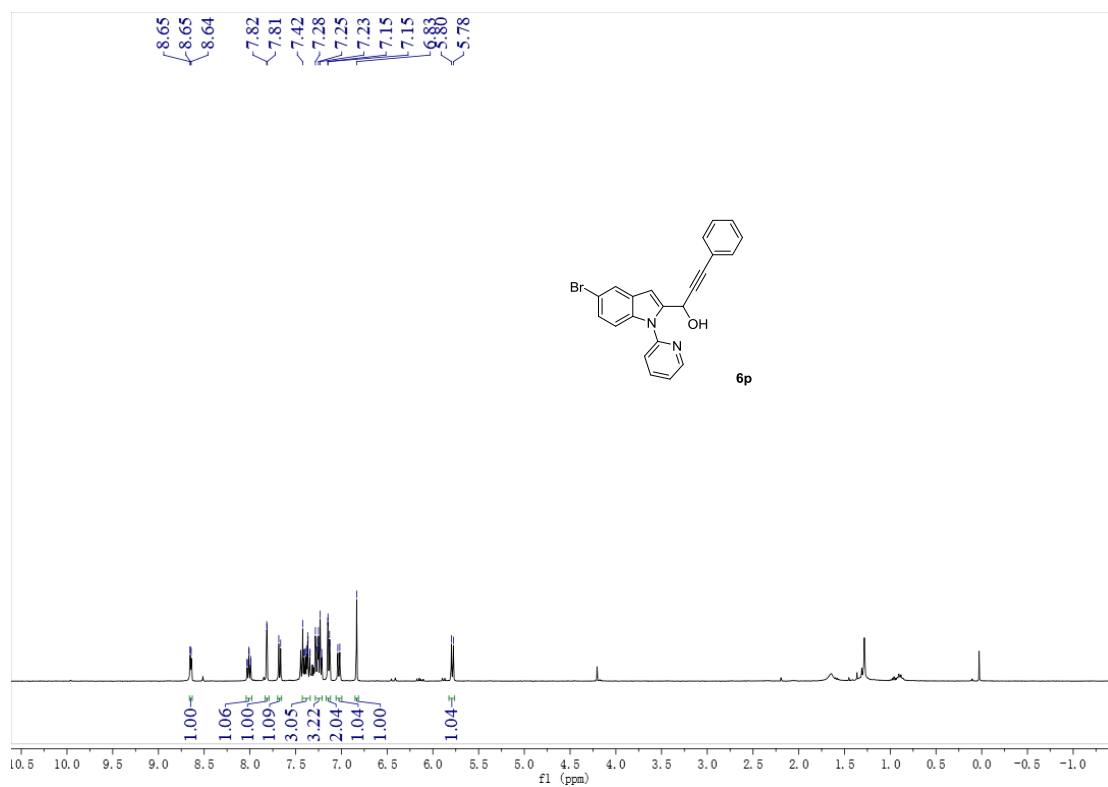

Supplementary Fig. 150 | <sup>1</sup>H NMR (400 MHz) of compound 6p (using CDCl<sub>3</sub> as solvent)

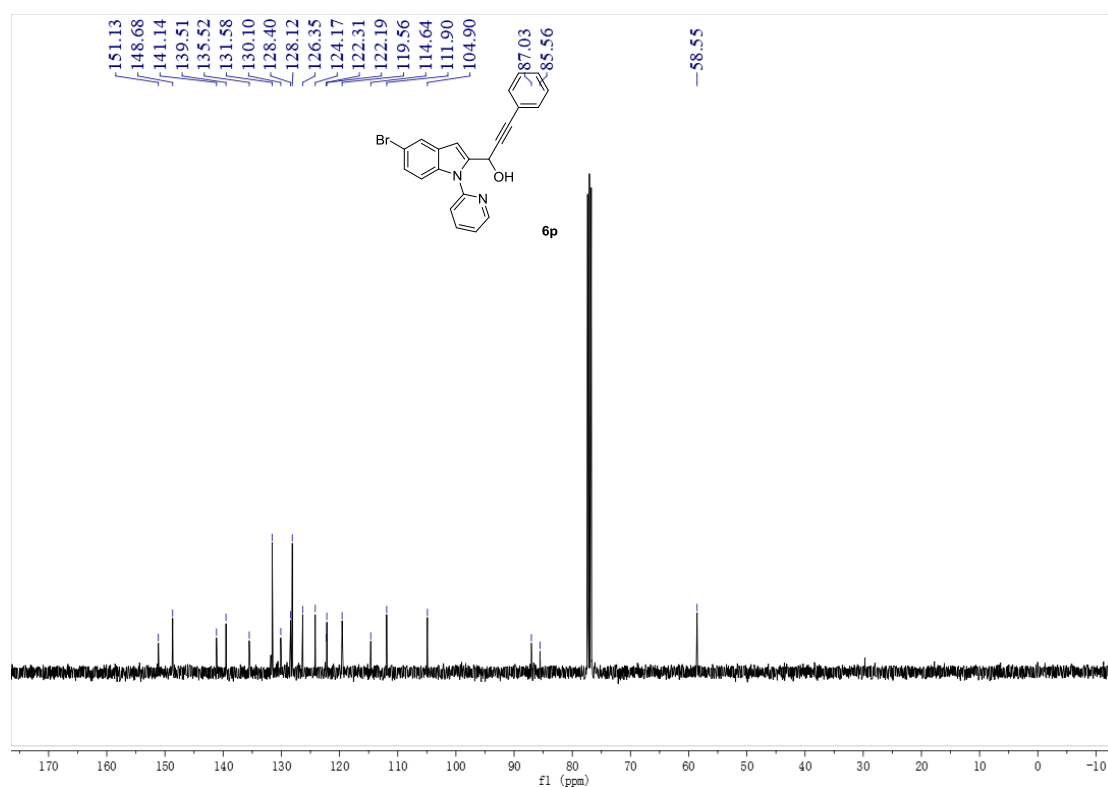

Supplementary Fig. 151 | <sup>13</sup>C NMR (101 MHz) of compound 6p (using CDCl<sub>3</sub> as solvent)

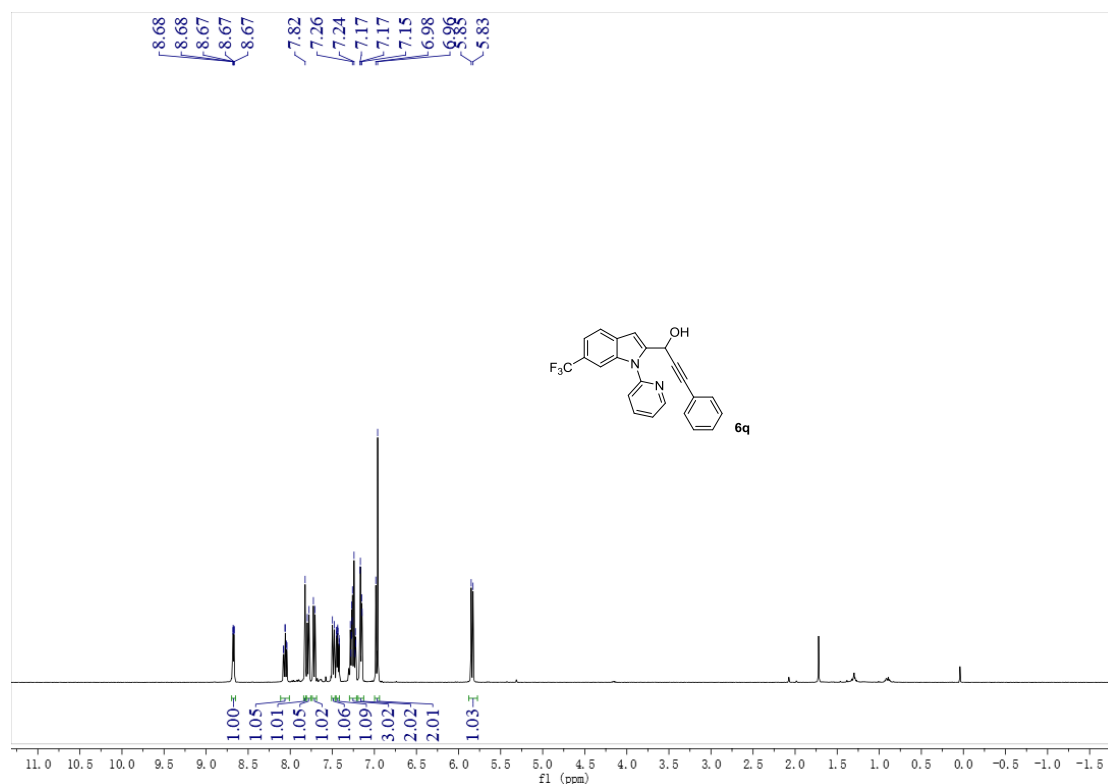

**Supplementary Fig. 152 | <sup>1</sup>H NMR (400 MHz) of compound 6q (using CDCl<sub>3</sub> as solvent)**

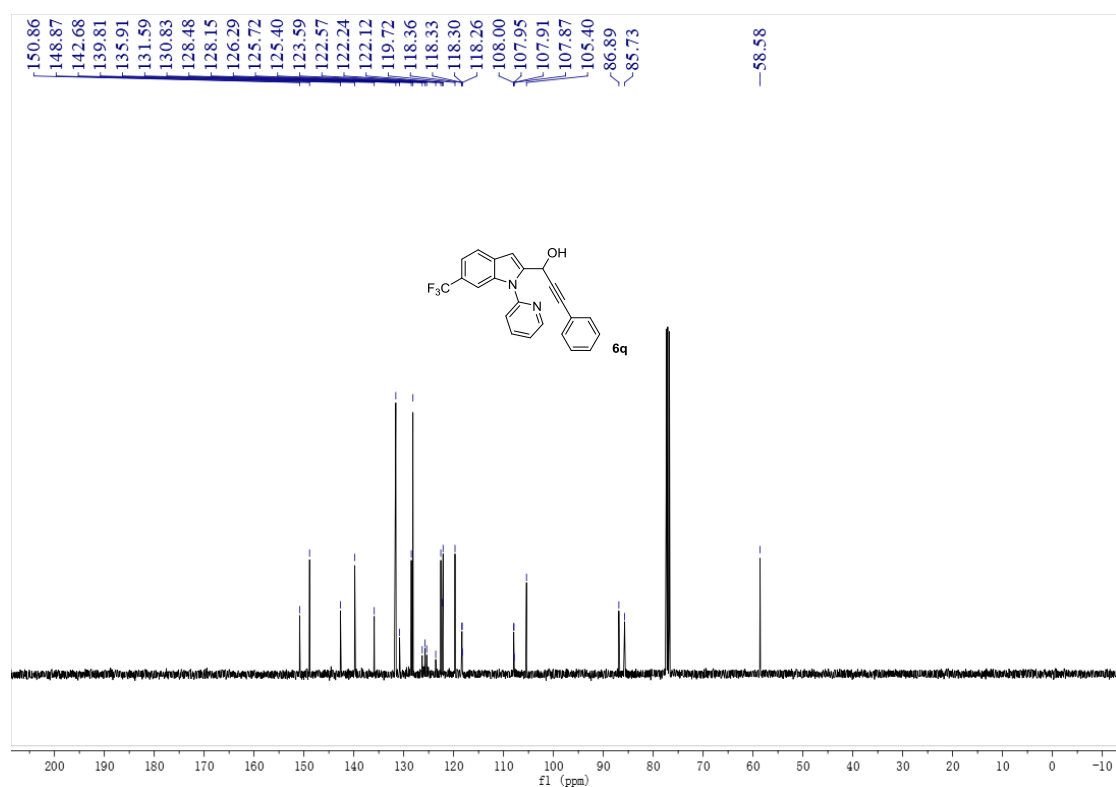

**Supplementary Fig. 153 | <sup>13</sup>C NMR (101 MHz) of compound 6q (using CDCl<sub>3</sub> as solvent)**

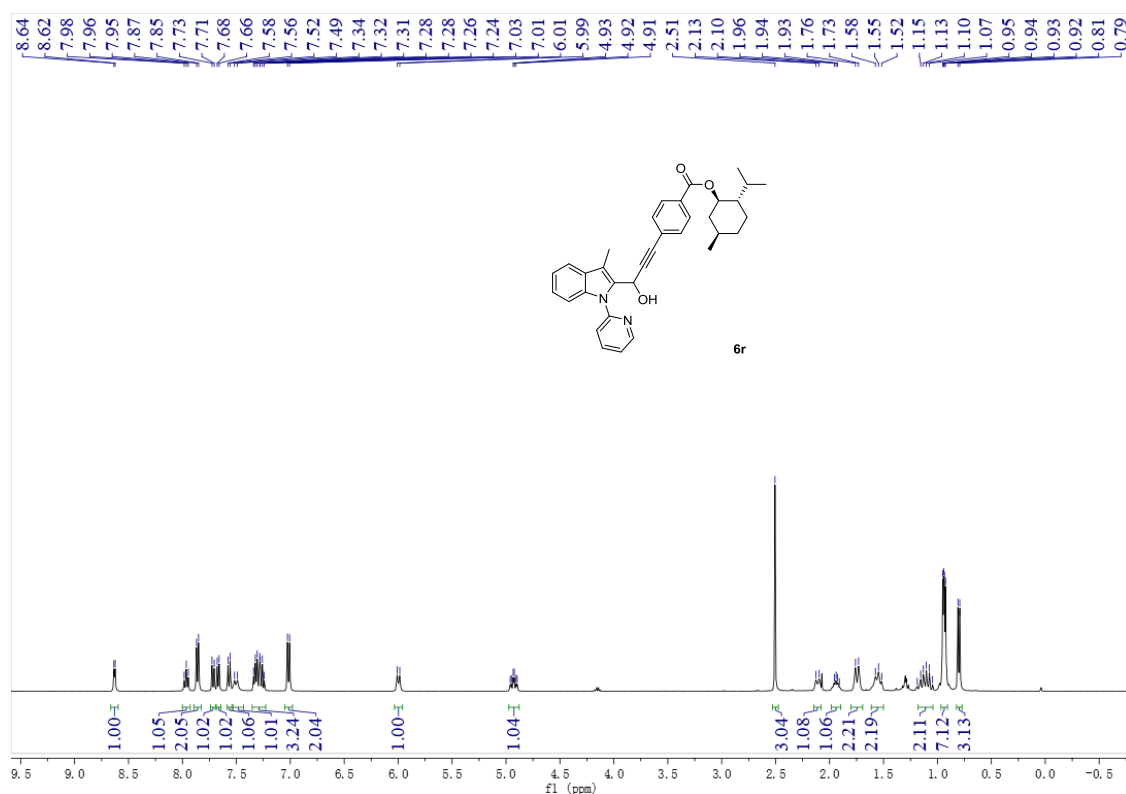

Supplementary Fig. 154 | <sup>1</sup>H NMR (400 MHz) of compound 6r (using CDCl<sub>3</sub> as solvent)

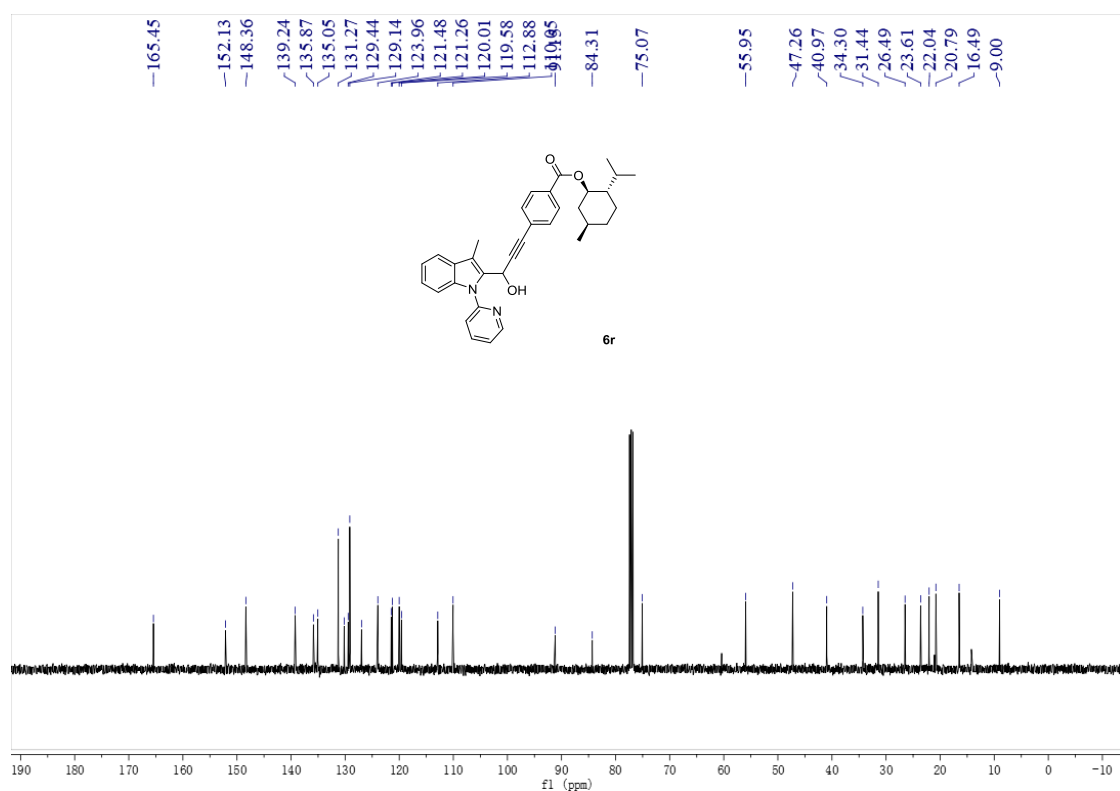

Supplementary Fig. 155 | <sup>13</sup>C NMR (101 MHz) of compound 6r (using CDCl<sub>3</sub> as solvent)



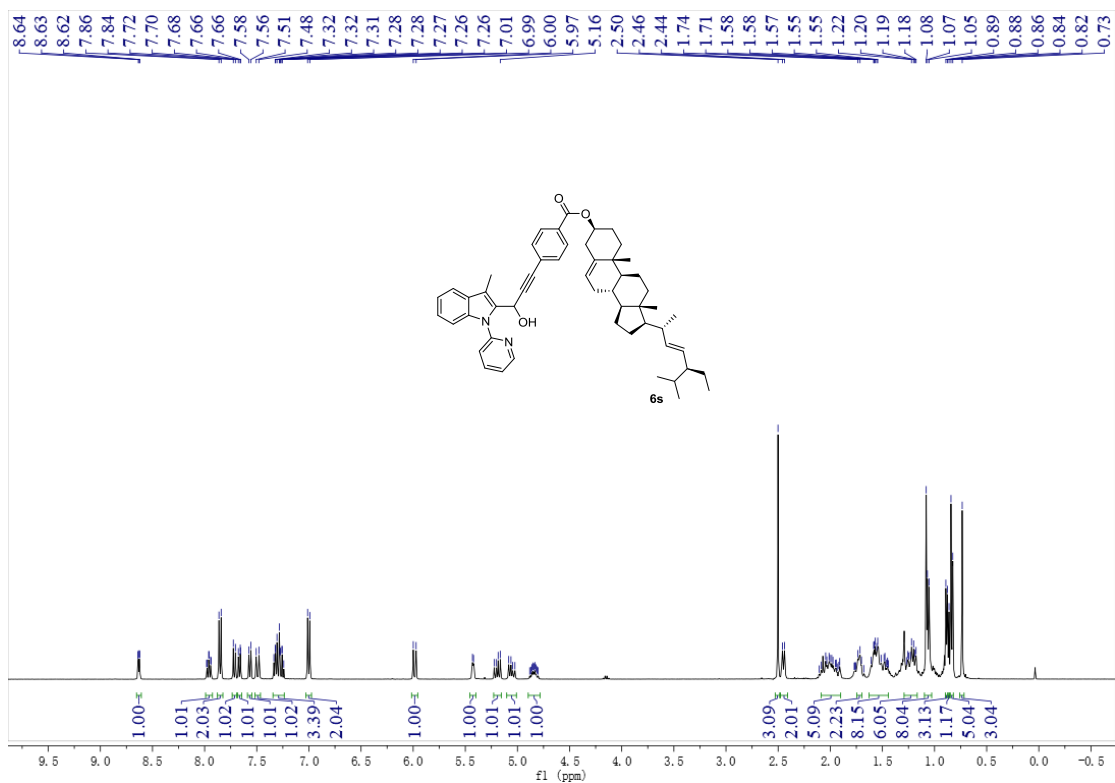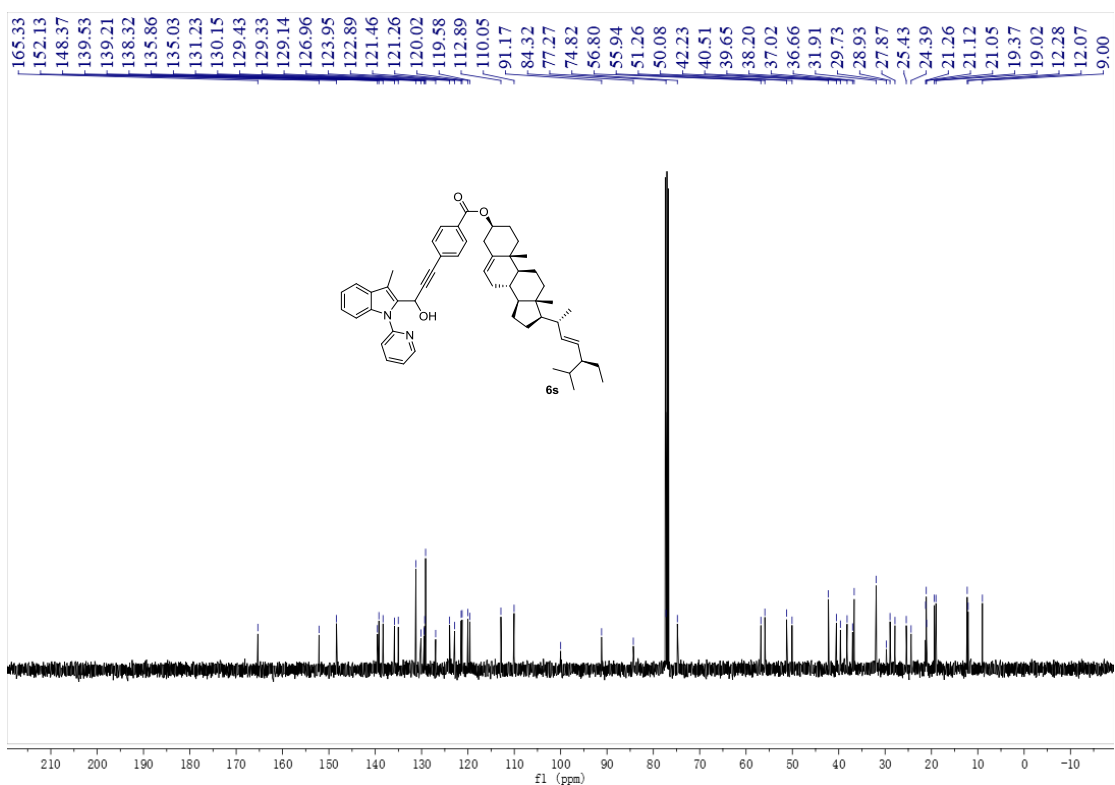

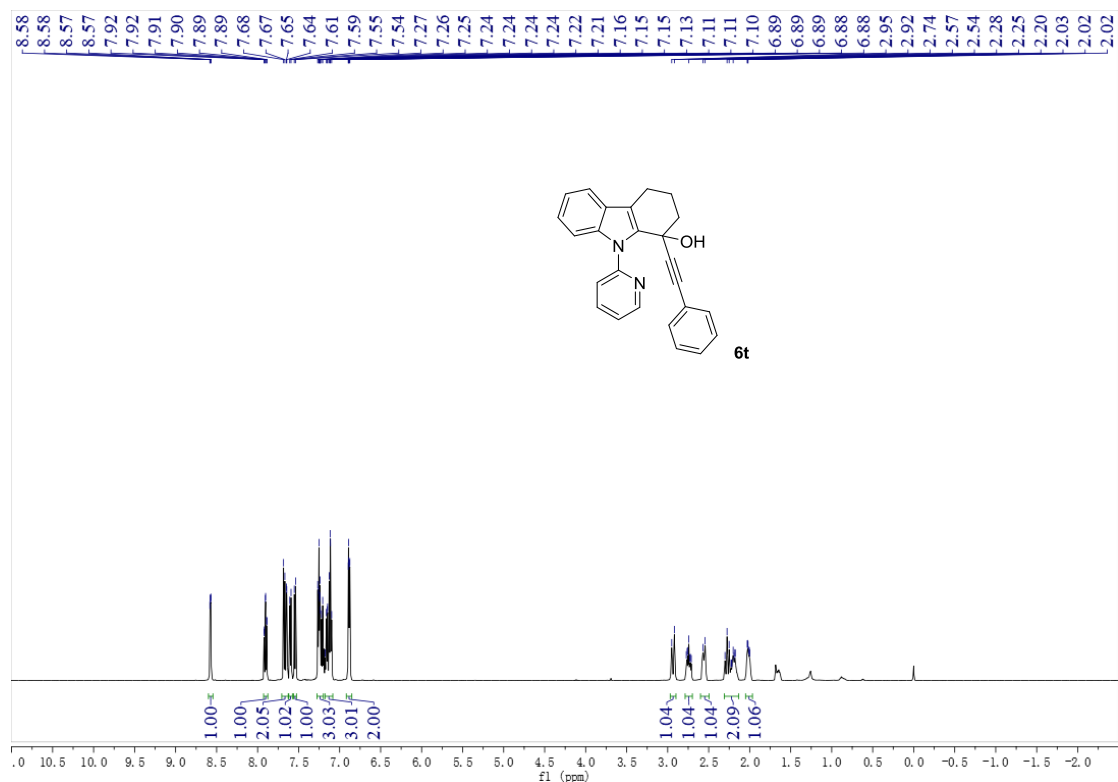

Supplementary Fig. 158 | <sup>1</sup>H NMR (500 MHz) of compound 6t (using CDCl<sub>3</sub> as solvent)

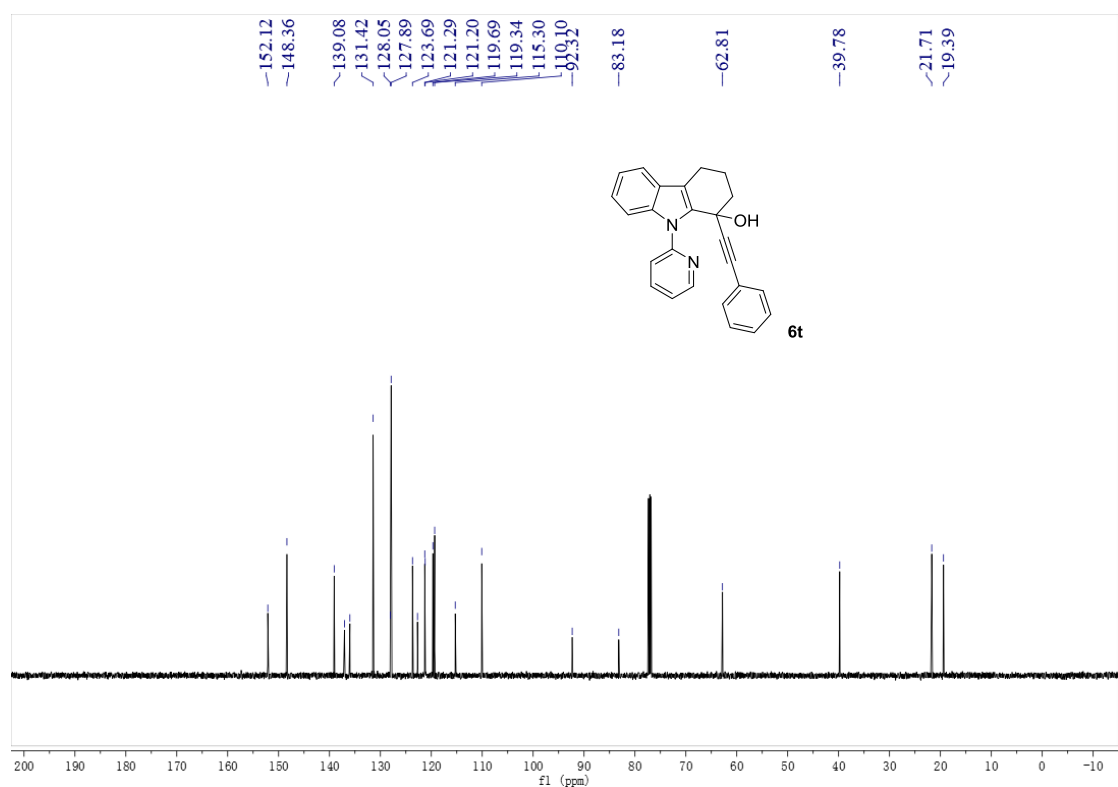

Supplementary Fig. 159 | <sup>13</sup>C NMR (126 MHz) of compound 6t (using CDCl<sub>3</sub> as solvent)

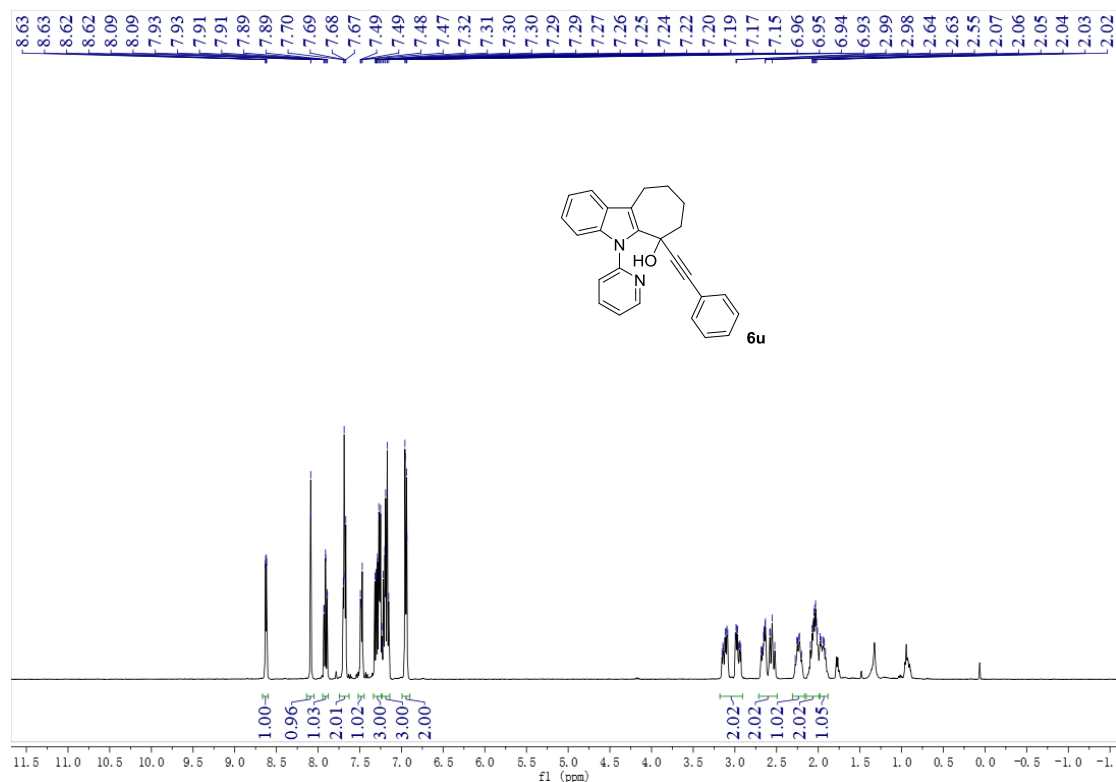

Supplementary Fig. 160 | <sup>1</sup>H NMR (400 MHz) of compound 6u (using CDCl<sub>3</sub> as solvent)

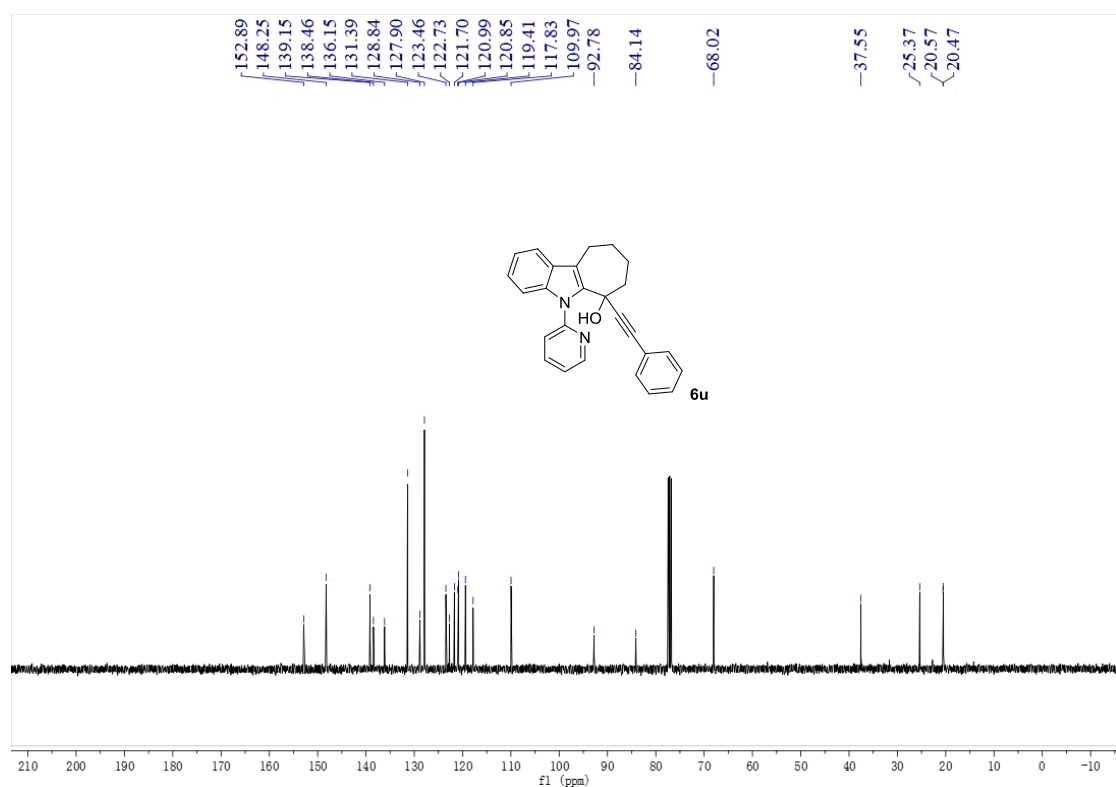

Supplementary Fig. 161 | <sup>13</sup>C NMR (101 MHz) of compound 6u (using CDCl<sub>3</sub> as solvent)

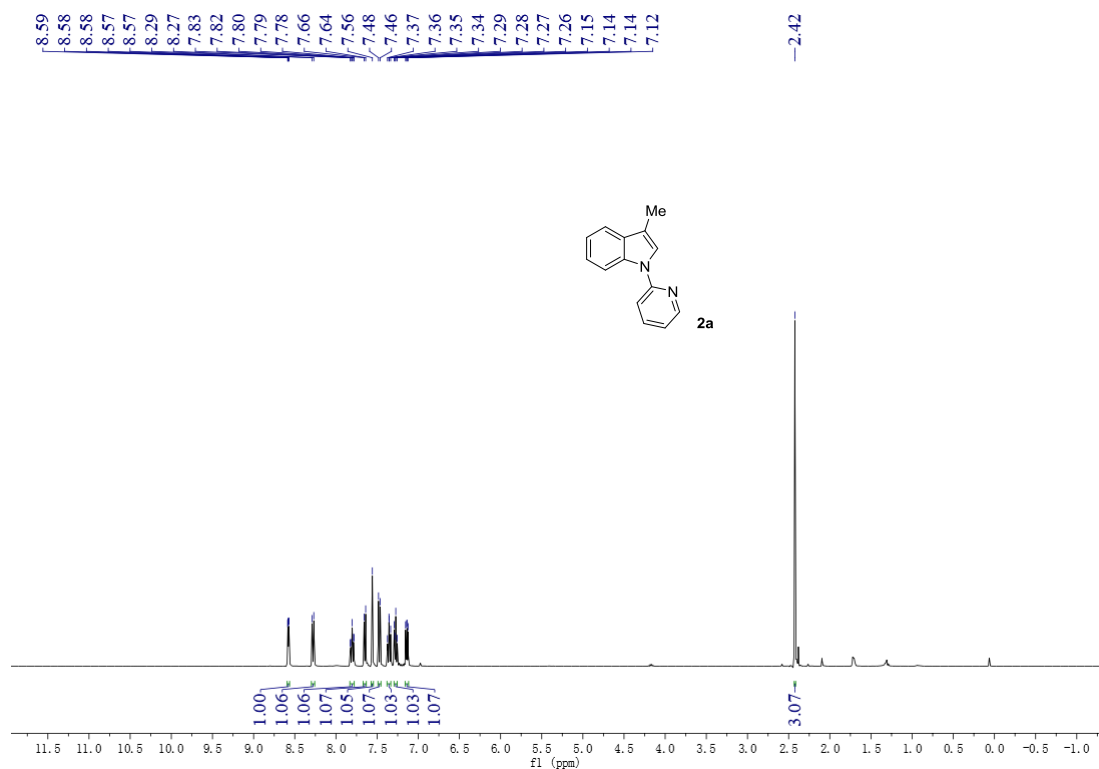

**Supplementary Fig. 162 | <sup>1</sup>H NMR (400 MHz) of compound 2a (using CDCl<sub>3</sub> as solvent)**

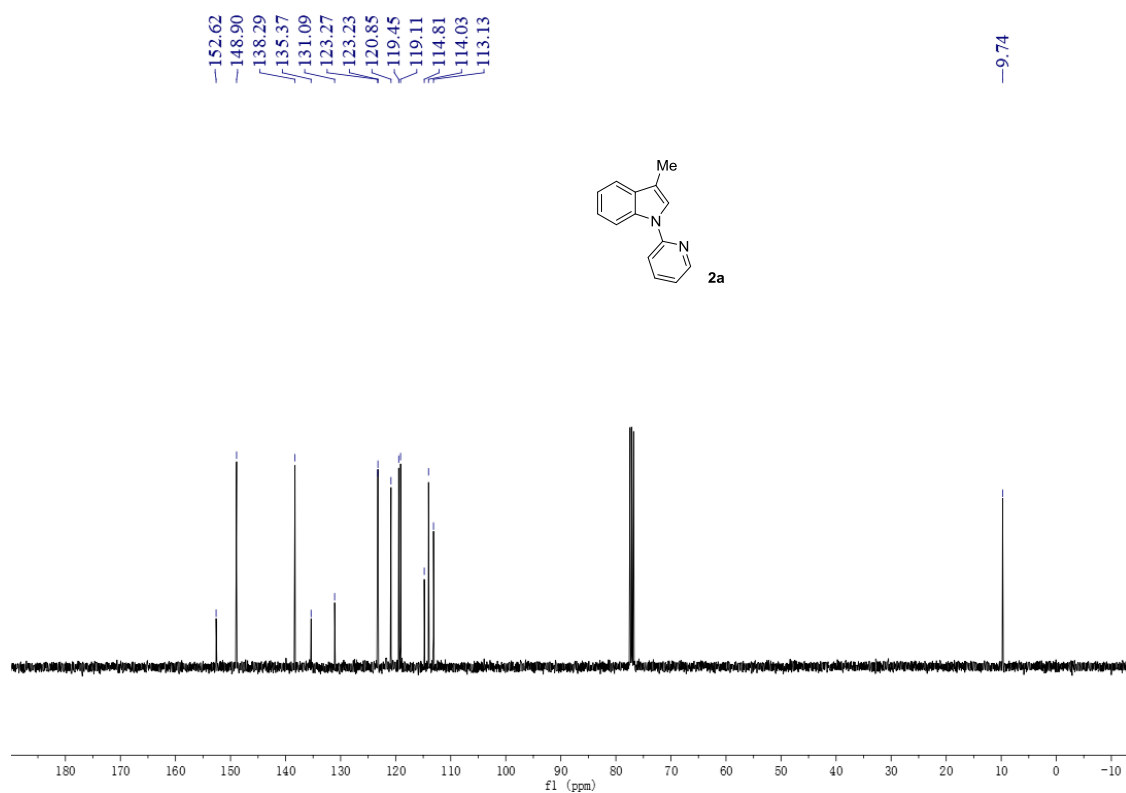

**Supplementary Fig. 163 | <sup>13</sup>C NMR (101 MHz) of compound 2a (using CDCl<sub>3</sub> as solvent)**

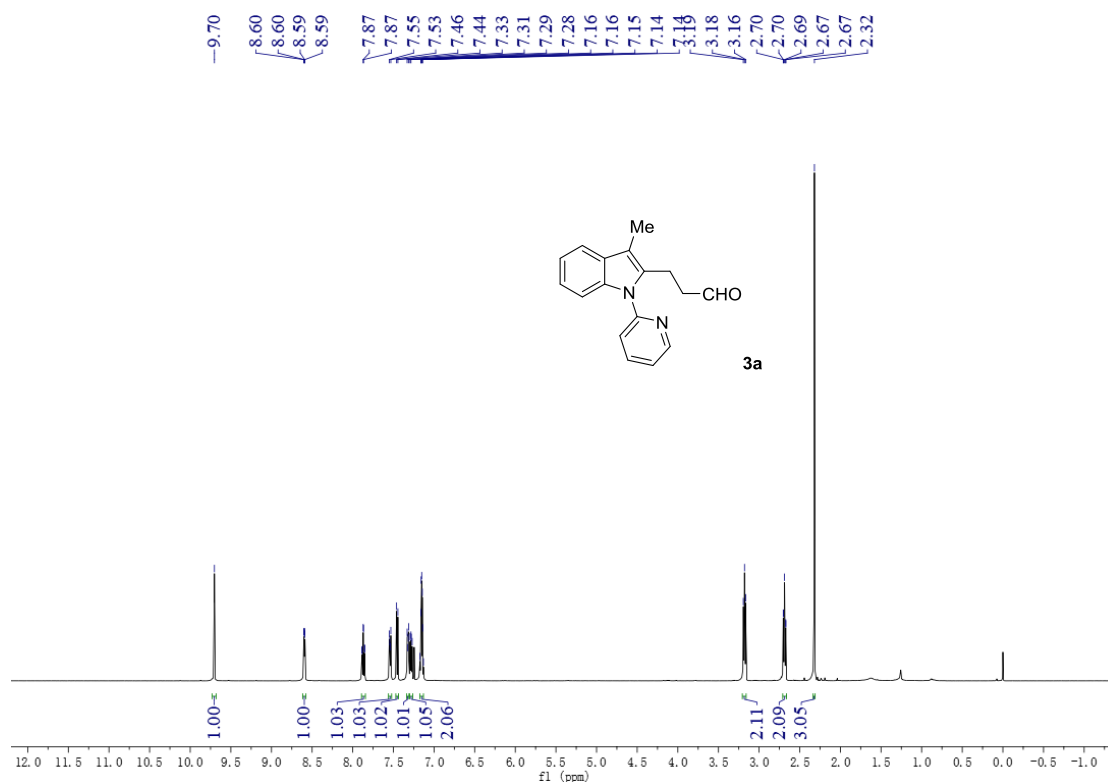

Supplementary Fig. 164 | <sup>1</sup>H NMR (500 MHz) of compound 3a (using CDCl<sub>3</sub> as solvent)

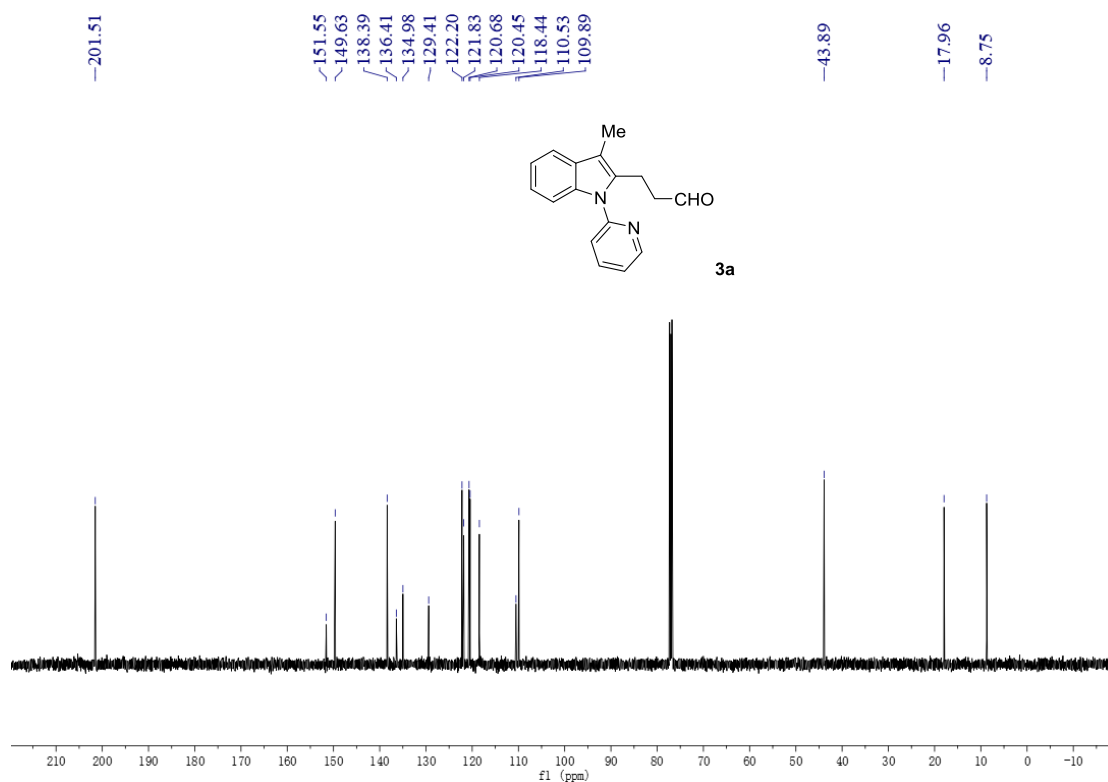

Supplementary Fig. 165 | <sup>13</sup>C NMR (126 MHz) of compound 3a (using CDCl<sub>3</sub> as solvent)

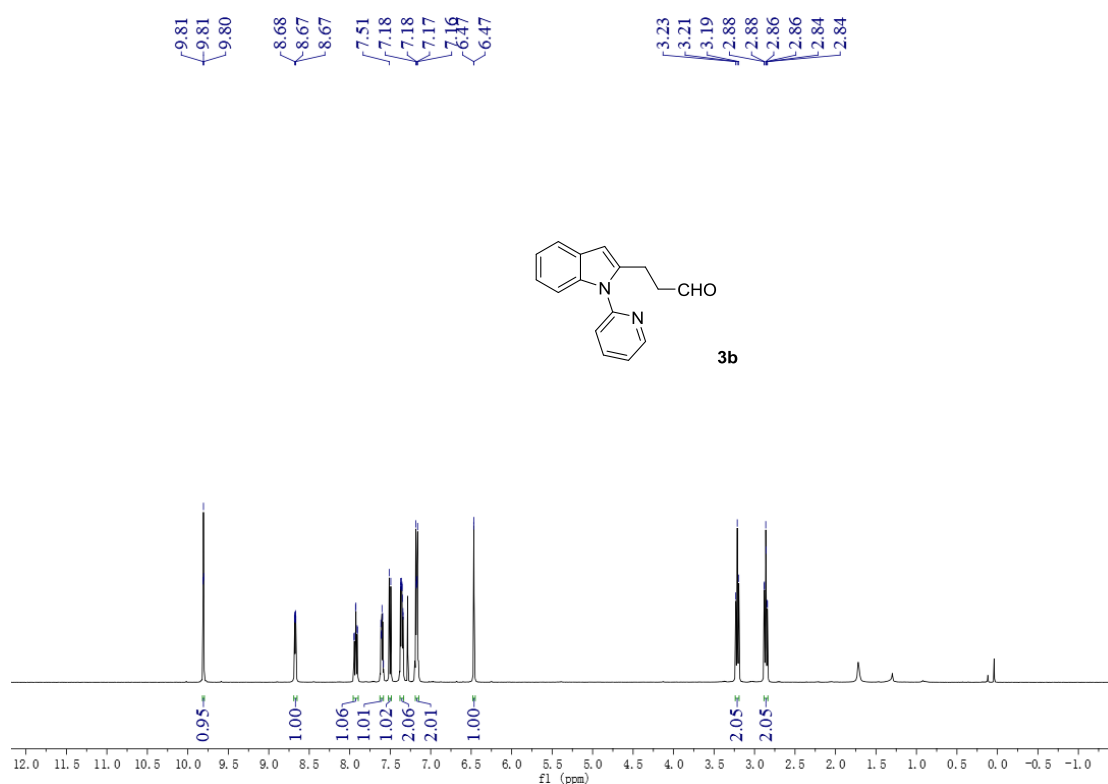

Supplementary Fig. 166 | <sup>1</sup>H NMR (400 MHz) of compound 3b (using CDCl<sub>3</sub> as solvent)

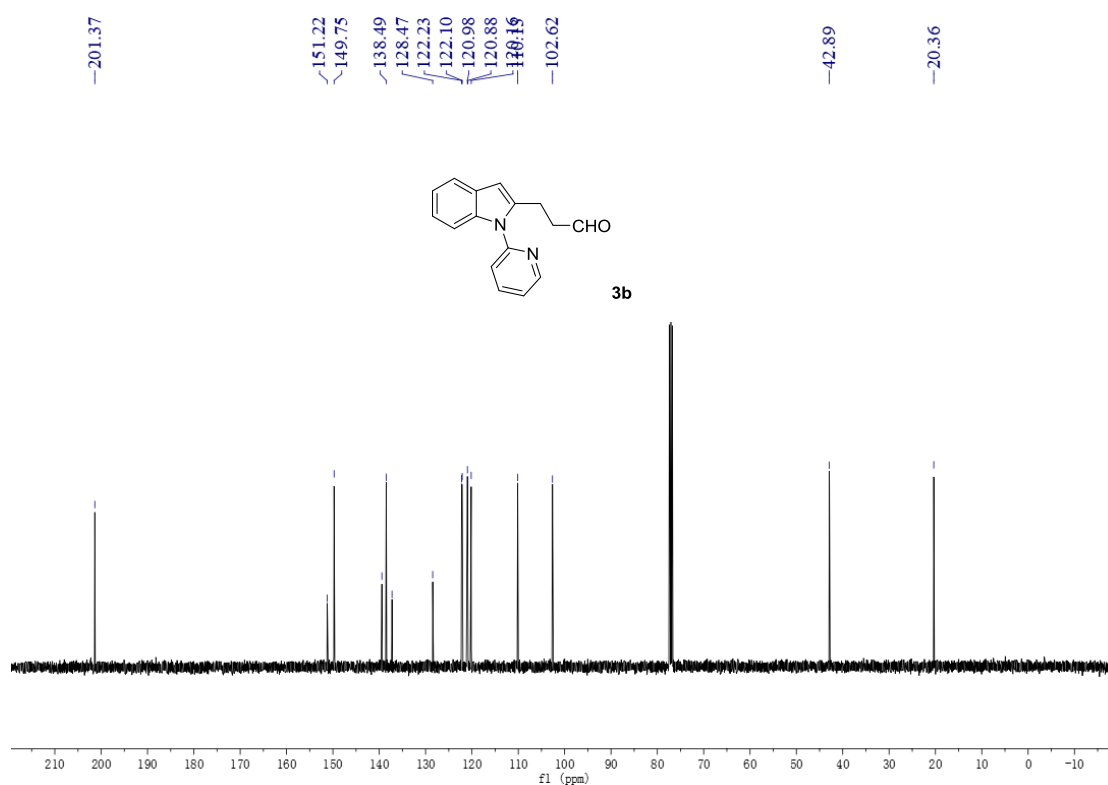

Supplementary Fig. 167 | <sup>13</sup>C NMR (101 MHz) of compound 3b (using CDCl<sub>3</sub> as solvent)

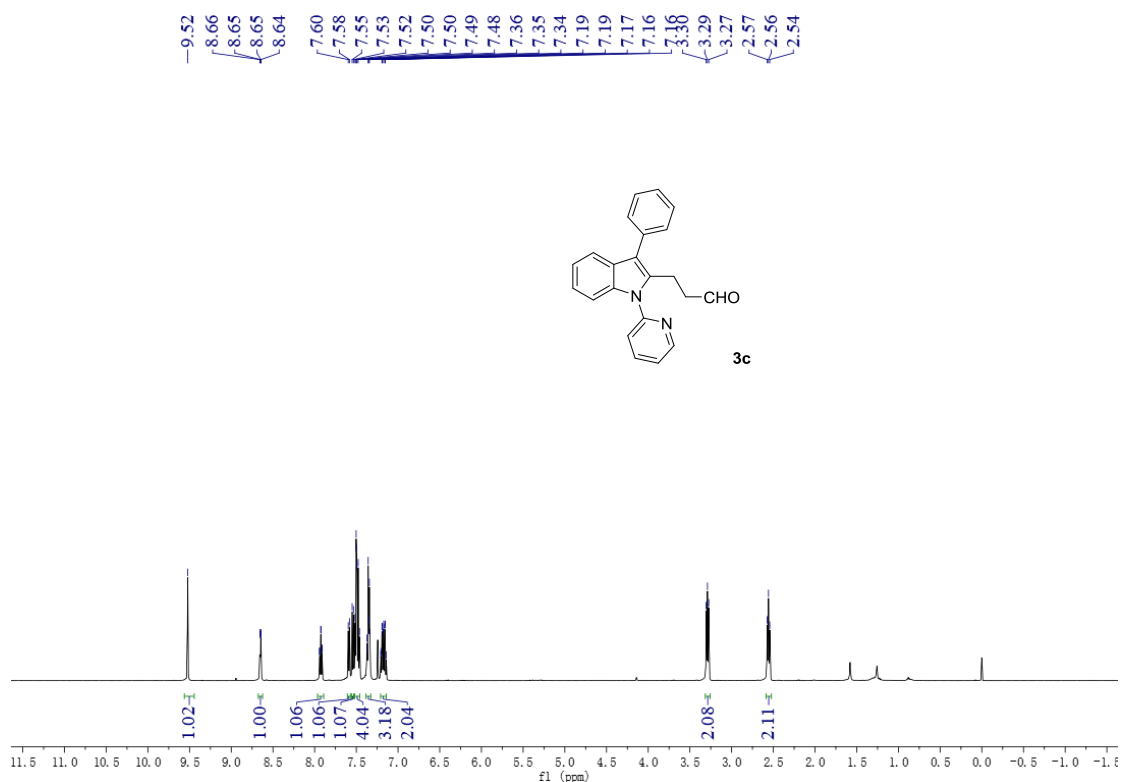

Supplementary Fig. 168 | <sup>1</sup>H NMR (500 MHz) of compound 3c (using CDCl<sub>3</sub> as solvent)

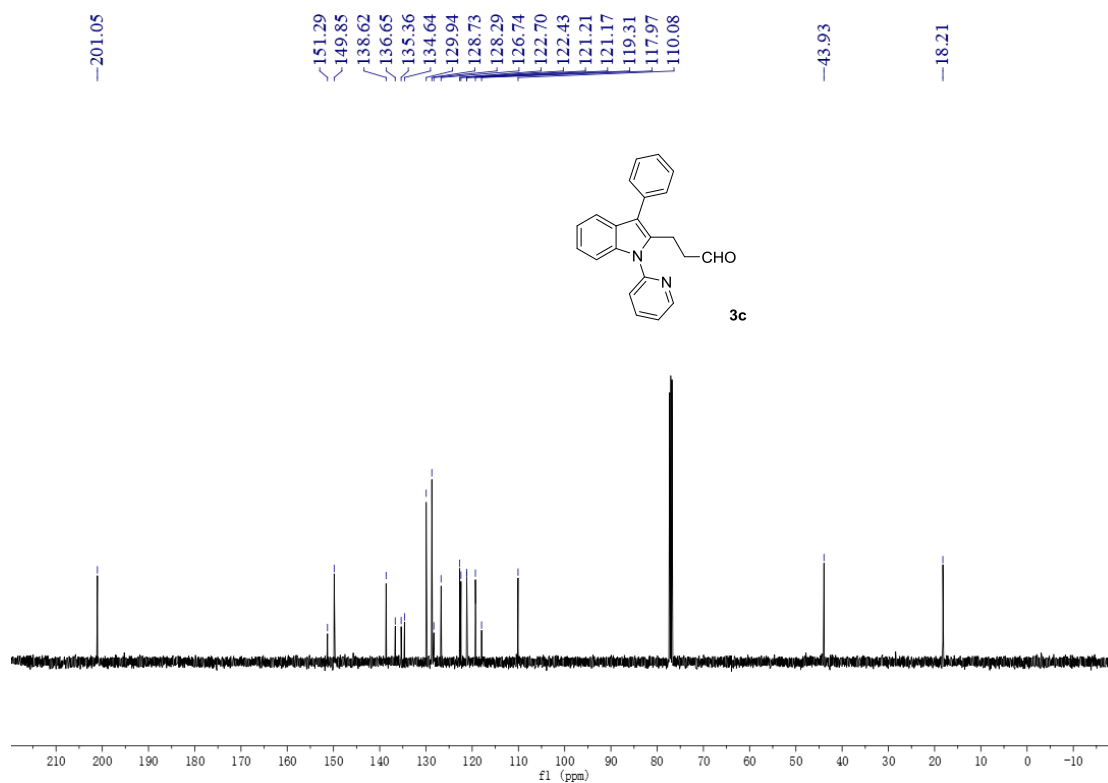

Supplementary Fig. 169 | <sup>13</sup>C NMR (126 MHz) of compound 3c (using CDCl<sub>3</sub> as solvent)

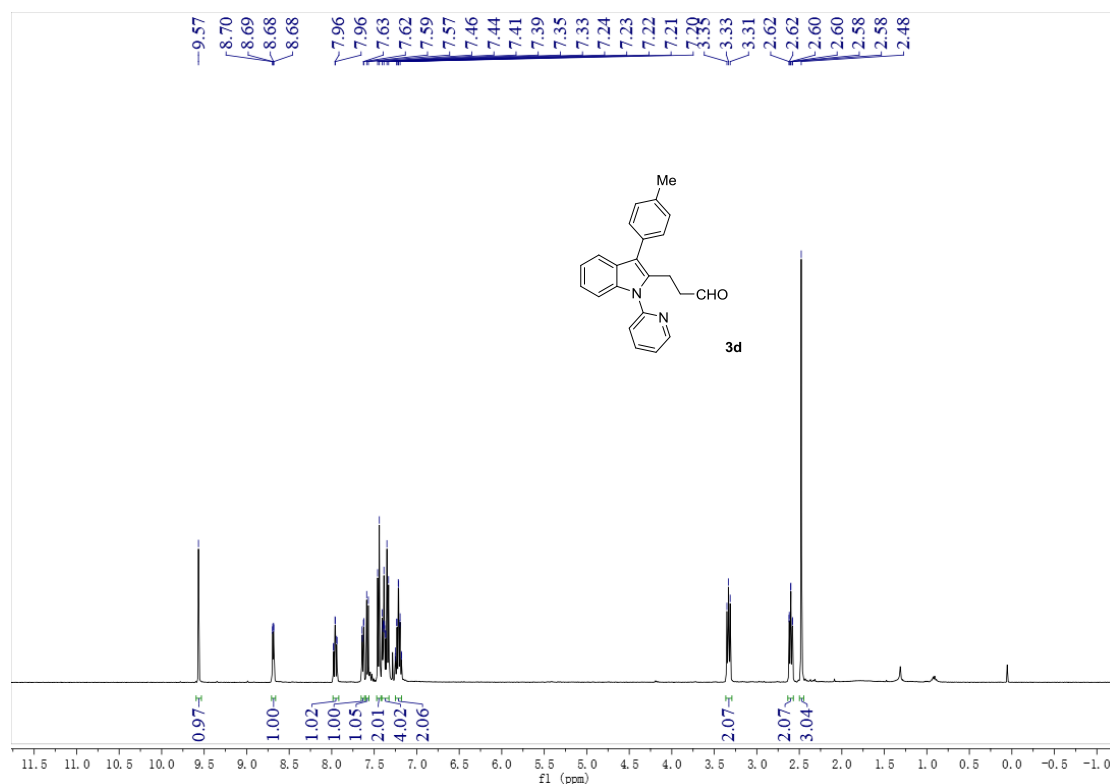

Supplementary Fig. 170 | <sup>1</sup>H NMR (400 MHz) of compound 3d (using CDCl<sub>3</sub> as solvent)

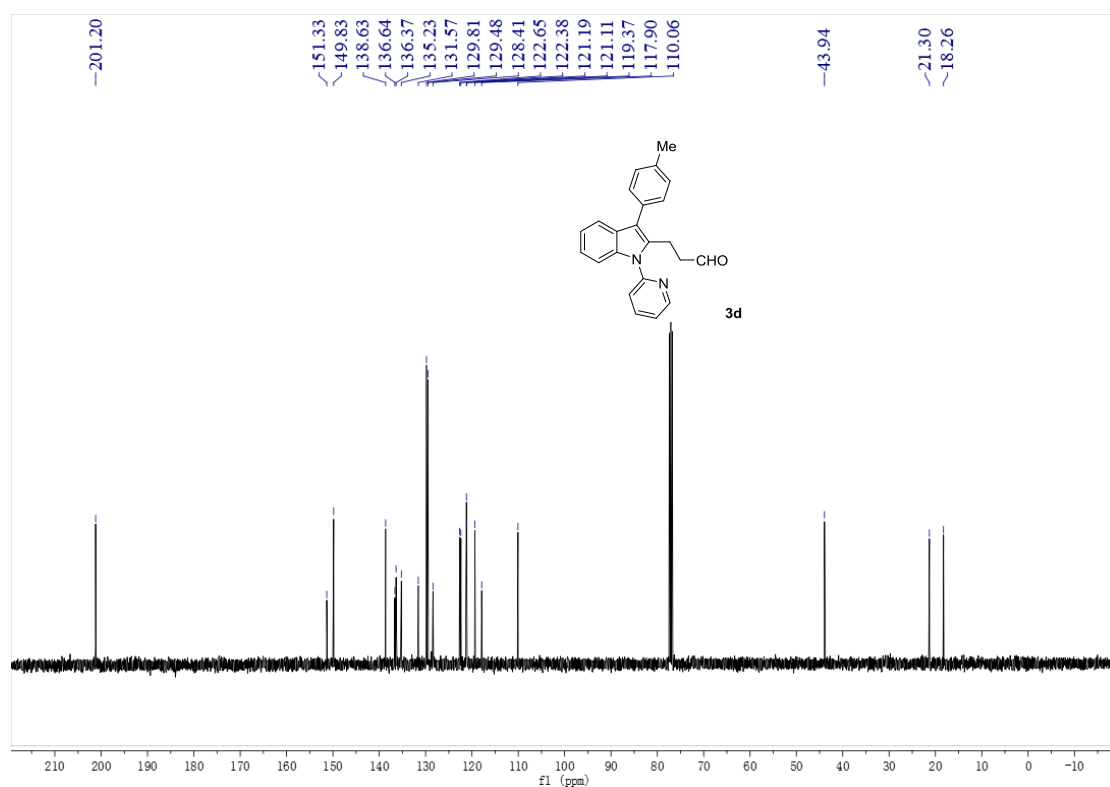

Supplementary Fig. 171 | <sup>13</sup>C NMR (101 MHz) of compound 3d (using CDCl<sub>3</sub> as solvent)



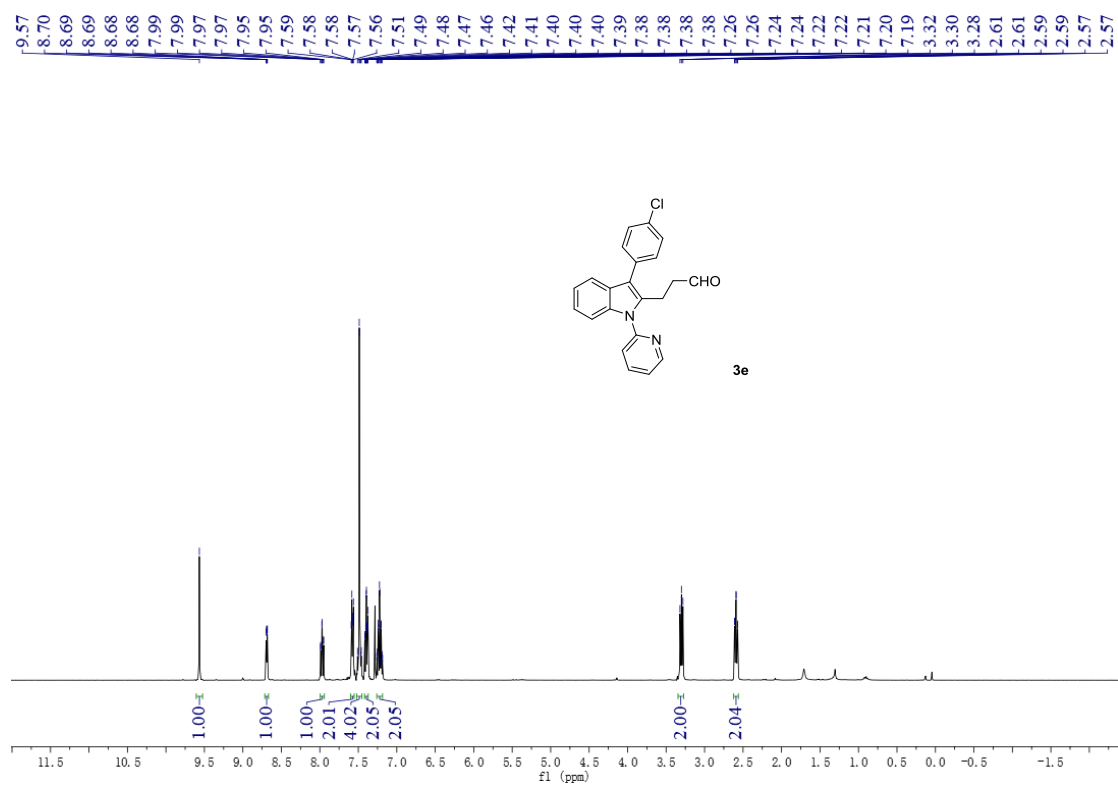

Supplementary Fig. 172 | <sup>1</sup>H NMR (400 MHz) of compound 3e (using CDCl<sub>3</sub> as solvent)

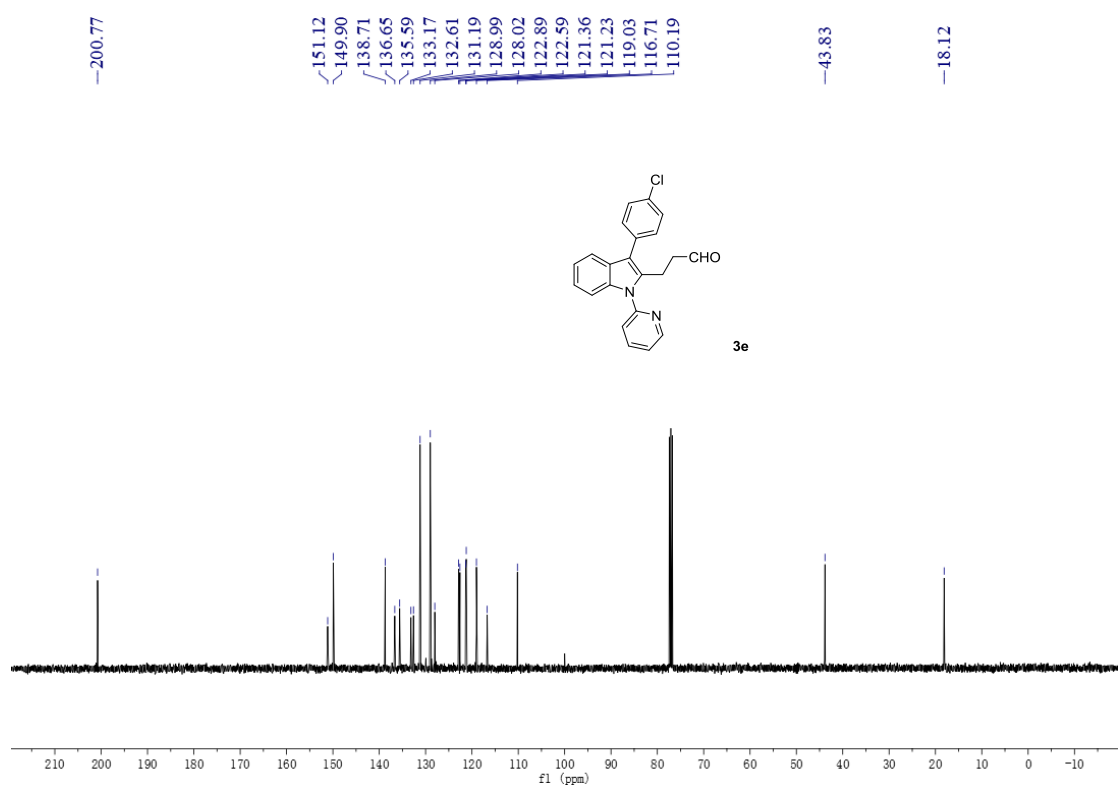

Supplementary Fig. 173 | <sup>13</sup>C NMR (101 MHz) of compound 3e (using CDCl<sub>3</sub> as solvent)

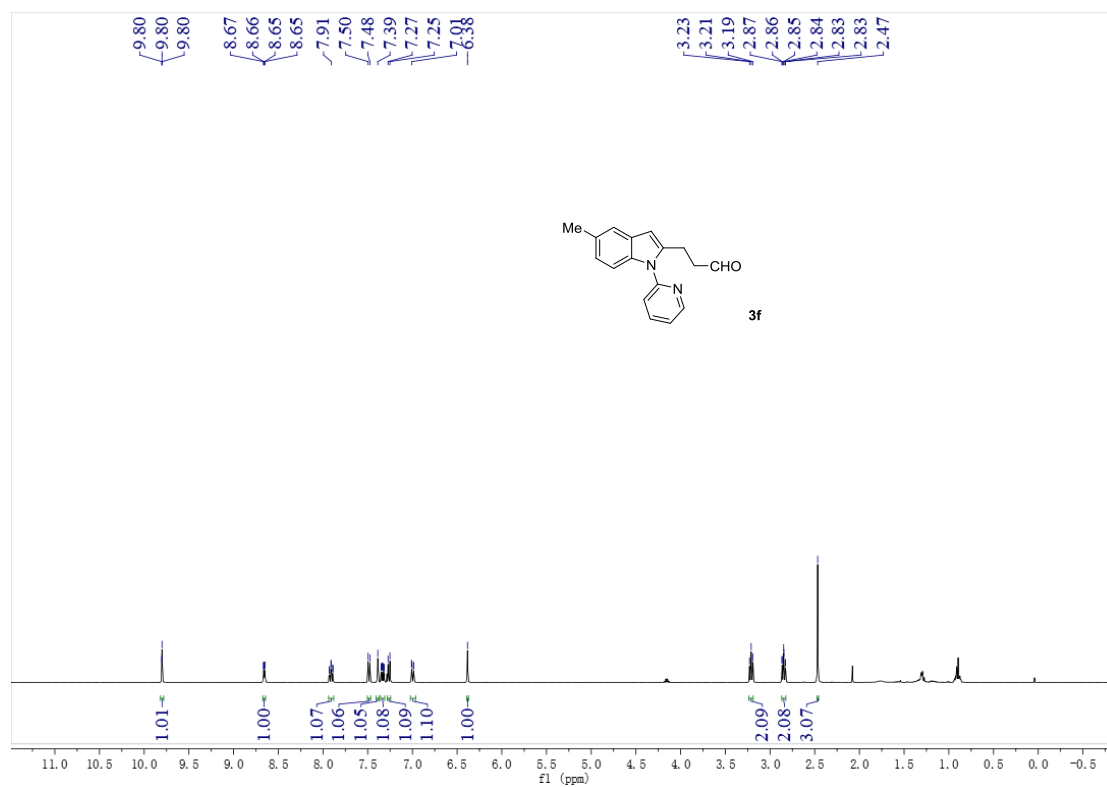

**Supplementary Fig. 174 | <sup>1</sup>H NMR (400 MHz) of compound 3f (using CDCl<sub>3</sub> as solvent)**

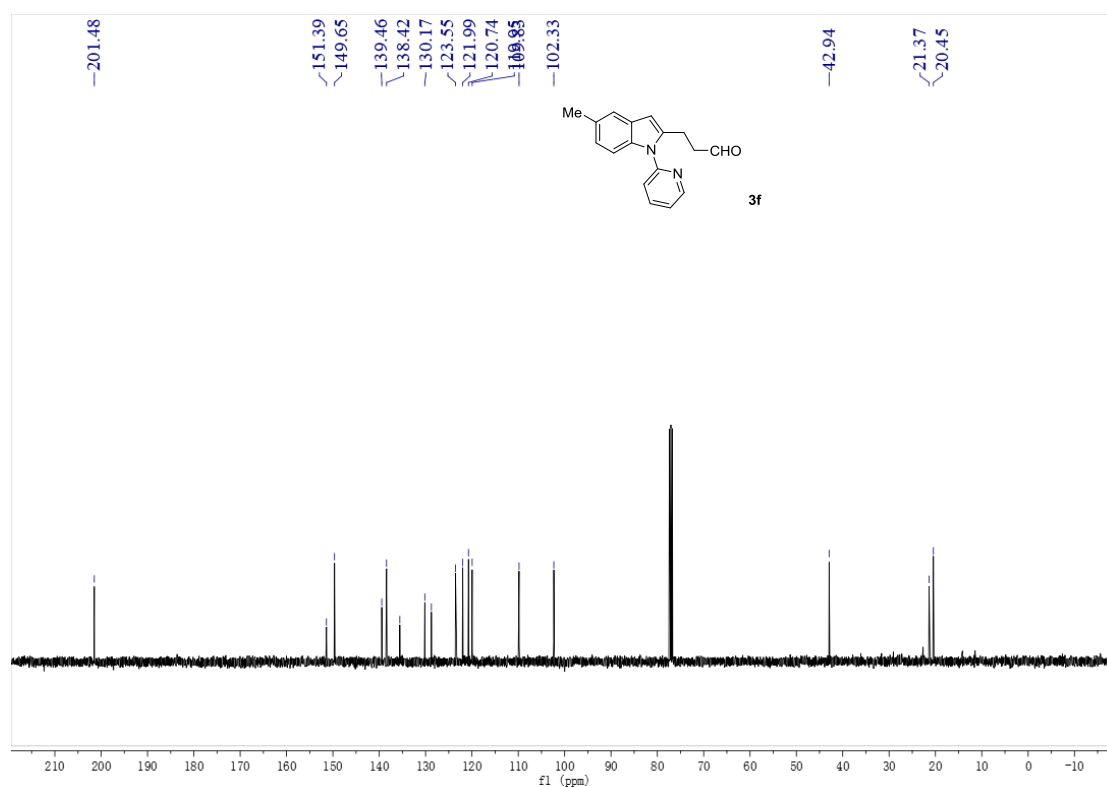

**Supplementary Fig. 175 | <sup>13</sup>C NMR (101 MHz) of compound 3f (using CDCl<sub>3</sub> as solvent)**

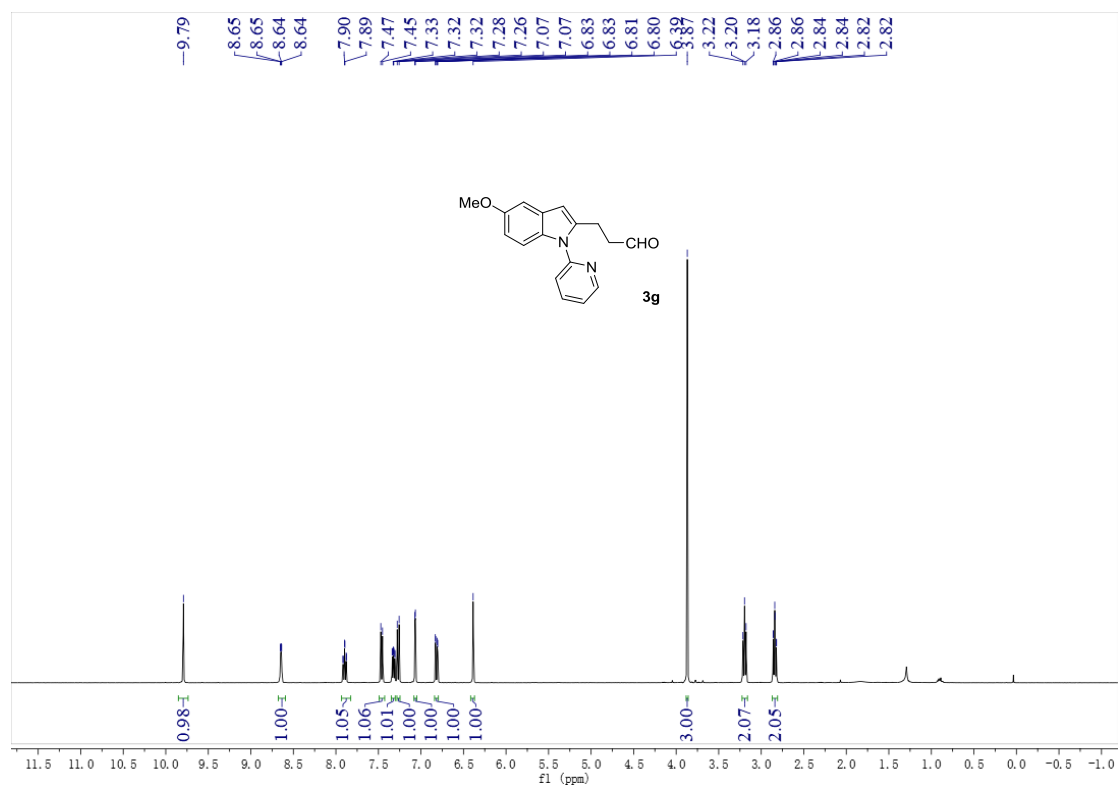

Supplementary Fig. 176 | <sup>1</sup>H NMR (400 MHz) of compound **3g** (using CDCl<sub>3</sub> as solvent)

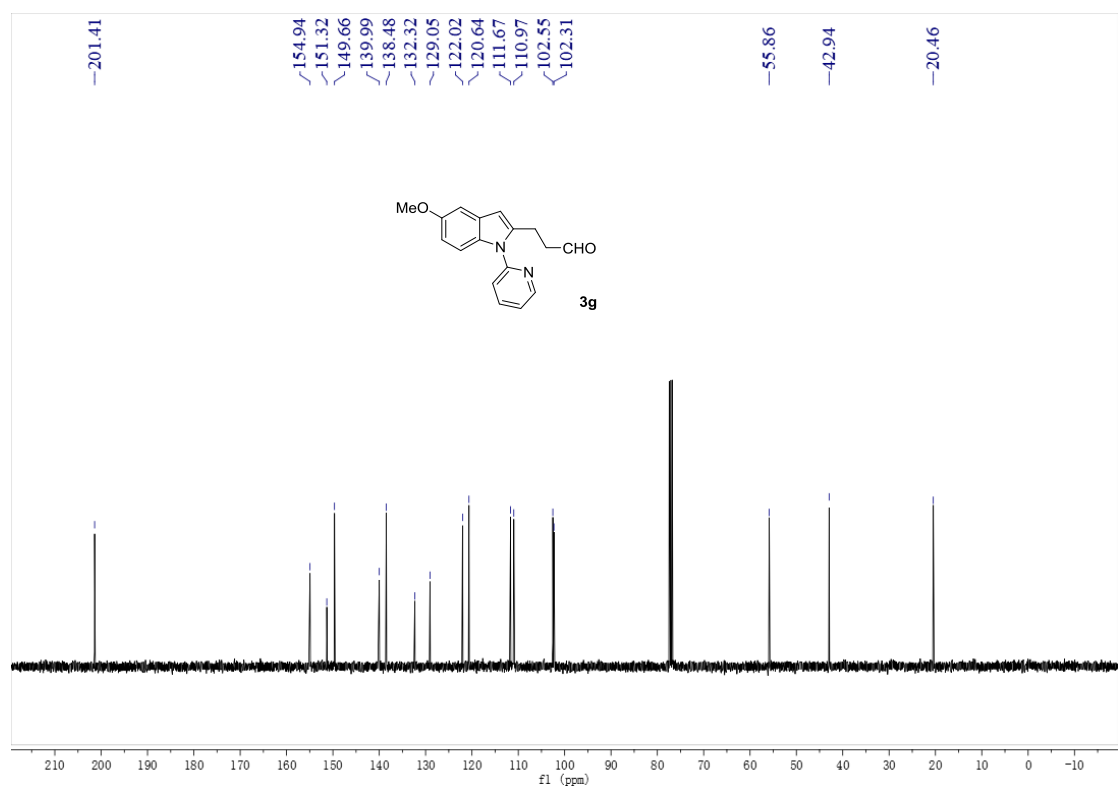

Supplementary Fig. 177 | <sup>13</sup>C NMR (101 MHz) of compound **3g** (using CDCl<sub>3</sub> as solvent)

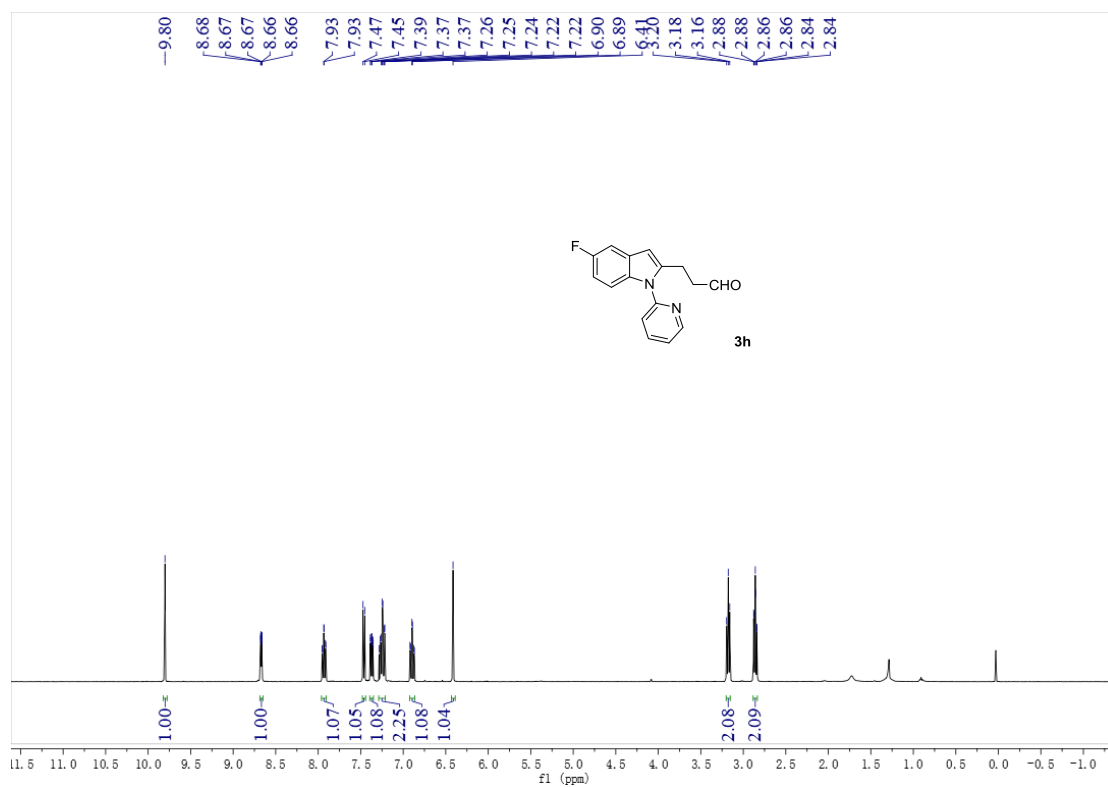

Supplementary Fig. 178 | <sup>1</sup>H NMR (400 MHz) of compound 3h (using CDCl<sub>3</sub> as solvent)

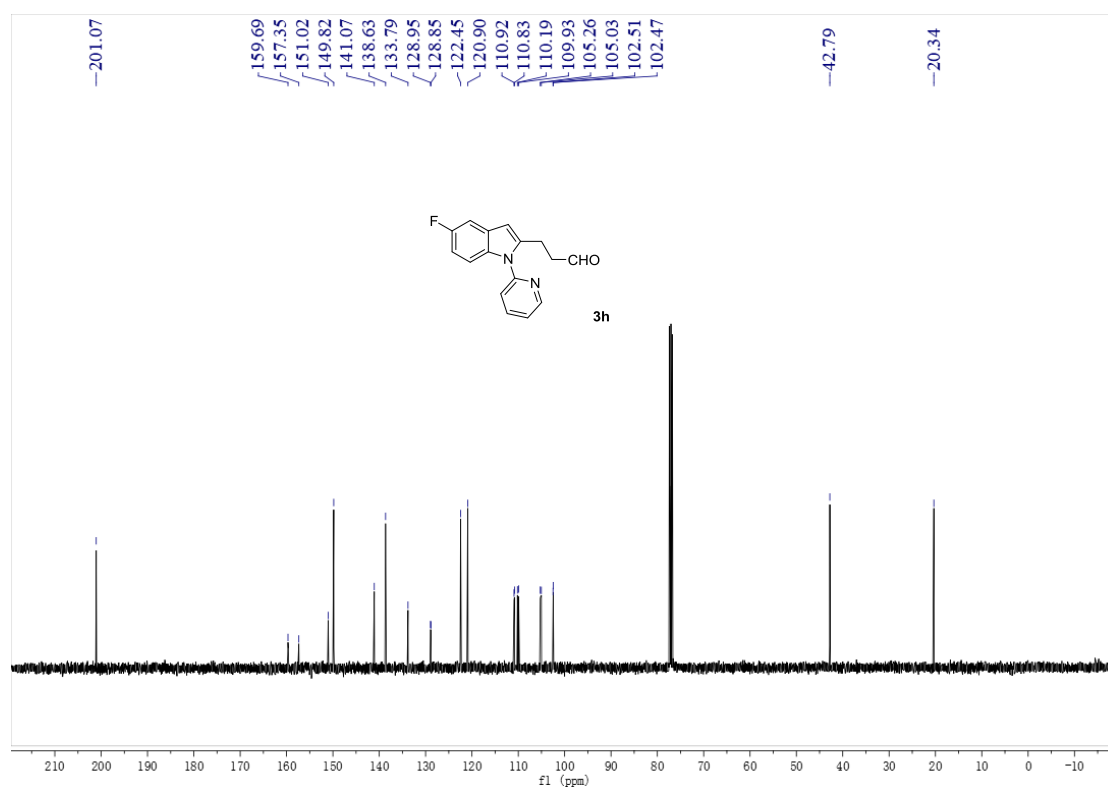

Supplementary Fig. 179 | <sup>13</sup>C NMR (101 MHz) of compound 3h (using CDCl<sub>3</sub> as solvent)

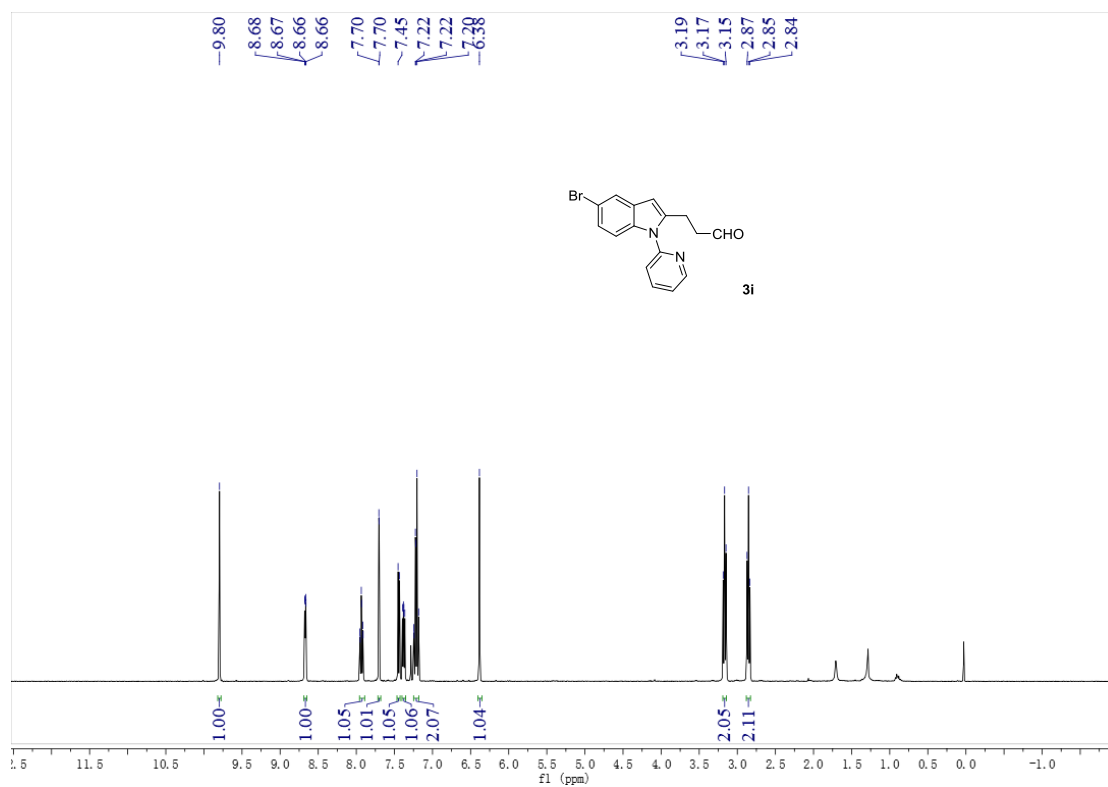

Supplementary Fig. 180 | <sup>1</sup>H NMR (400 MHz) of compound **3i** (using CDCl<sub>3</sub> as solvent)

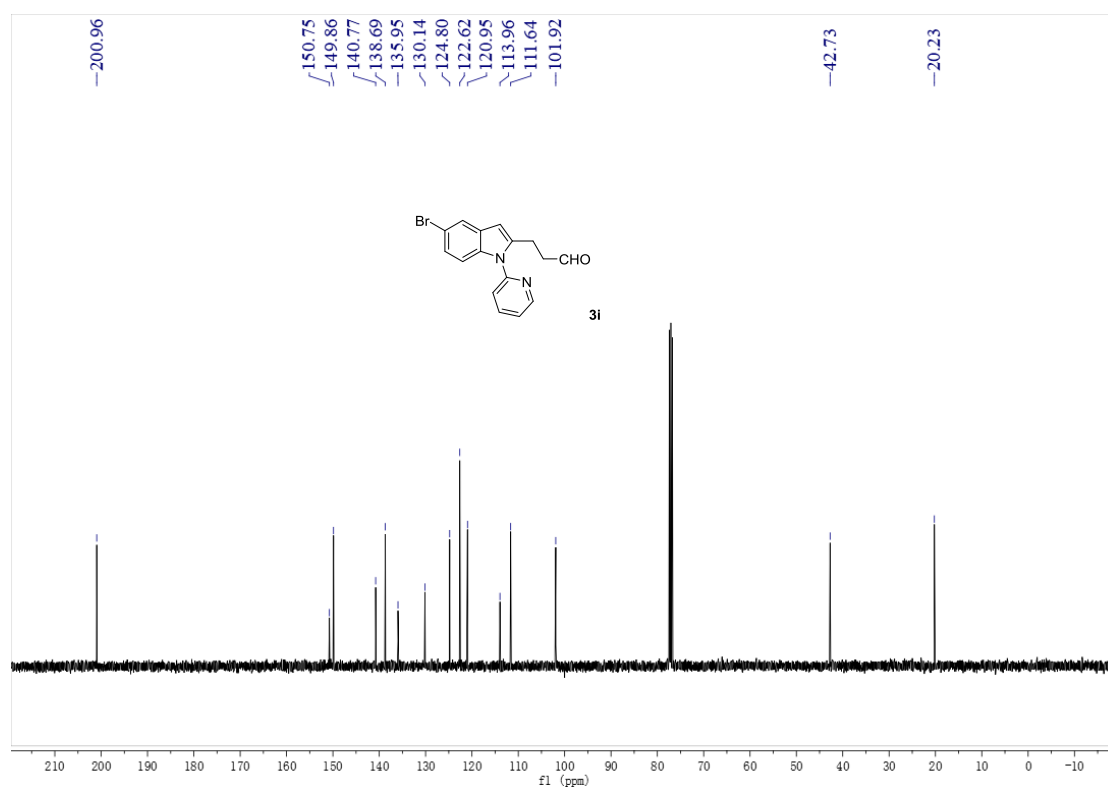

Supplementary Fig. 181 | <sup>13</sup>C NMR (101 MHz) of compound **3i** (using CDCl<sub>3</sub> as solvent)

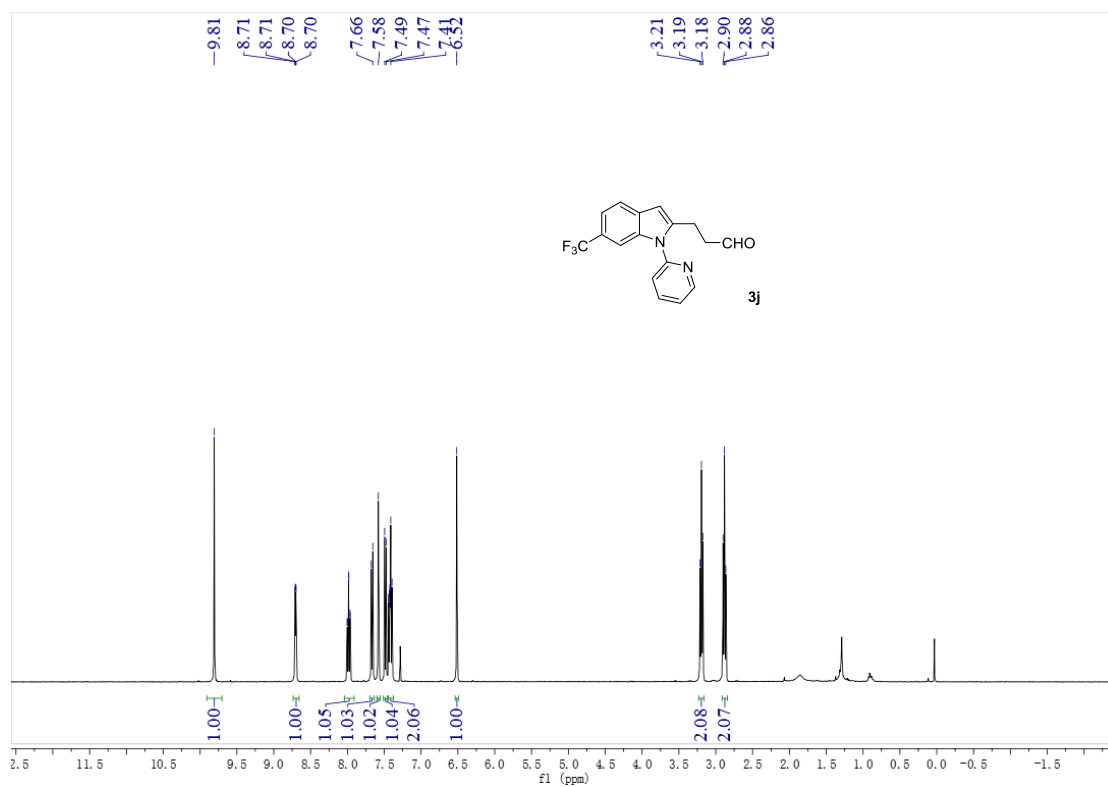

Supplementary Fig. 182 | <sup>1</sup>H NMR (400 MHz) of compound 3j (using CDCl<sub>3</sub> as solvent)

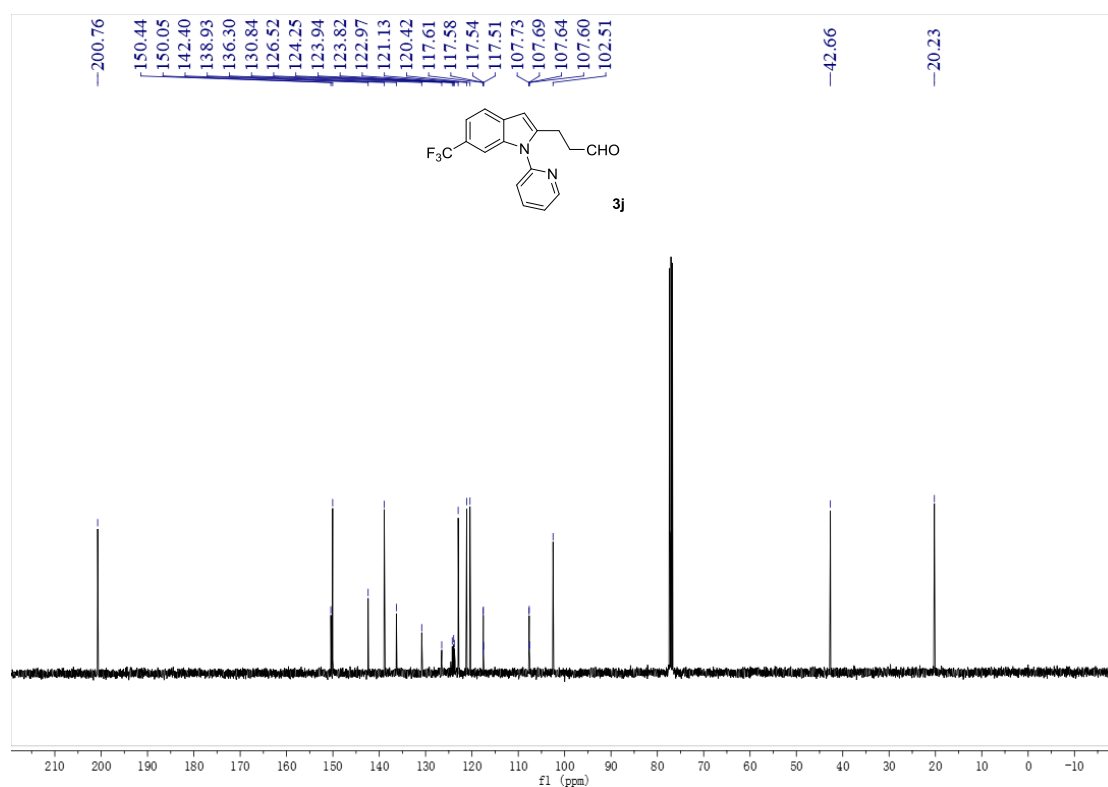

Supplementary Fig. 183 | <sup>13</sup>C NMR (101 MHz) of compound 3j (using CDCl<sub>3</sub> as solvent)

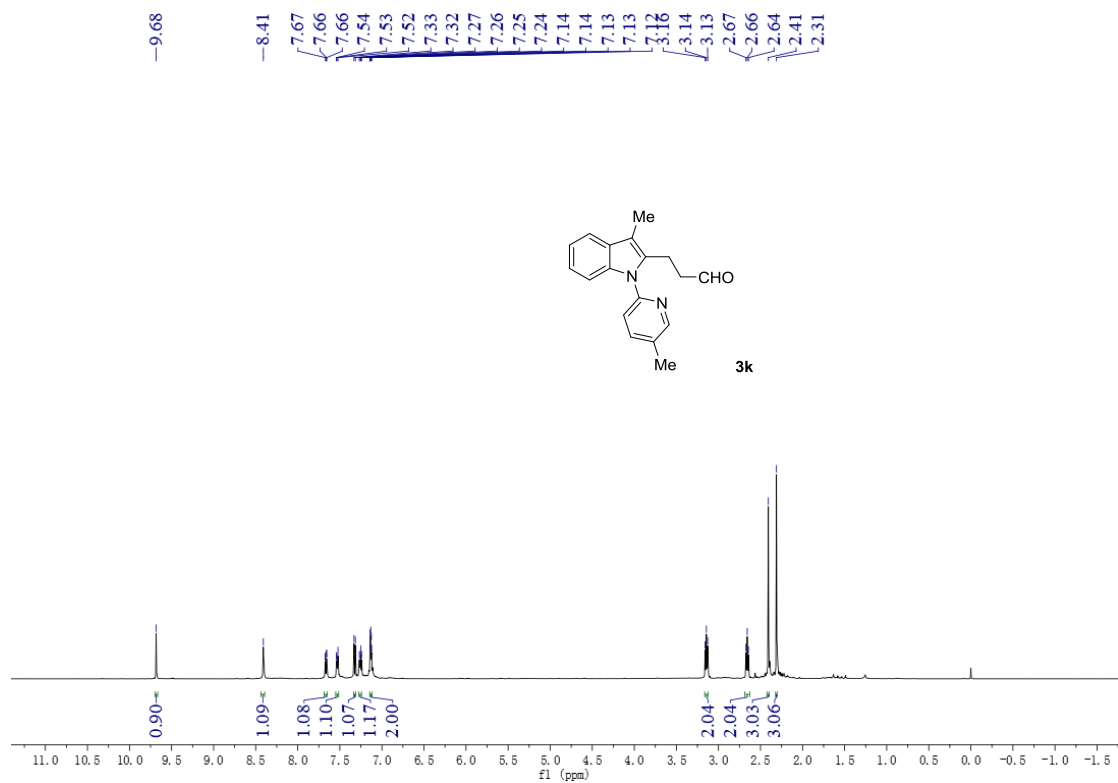

Supplementary Fig. 184 | <sup>1</sup>H NMR (500 MHz) of compound 3k (using CDCl<sub>3</sub> as solvent)

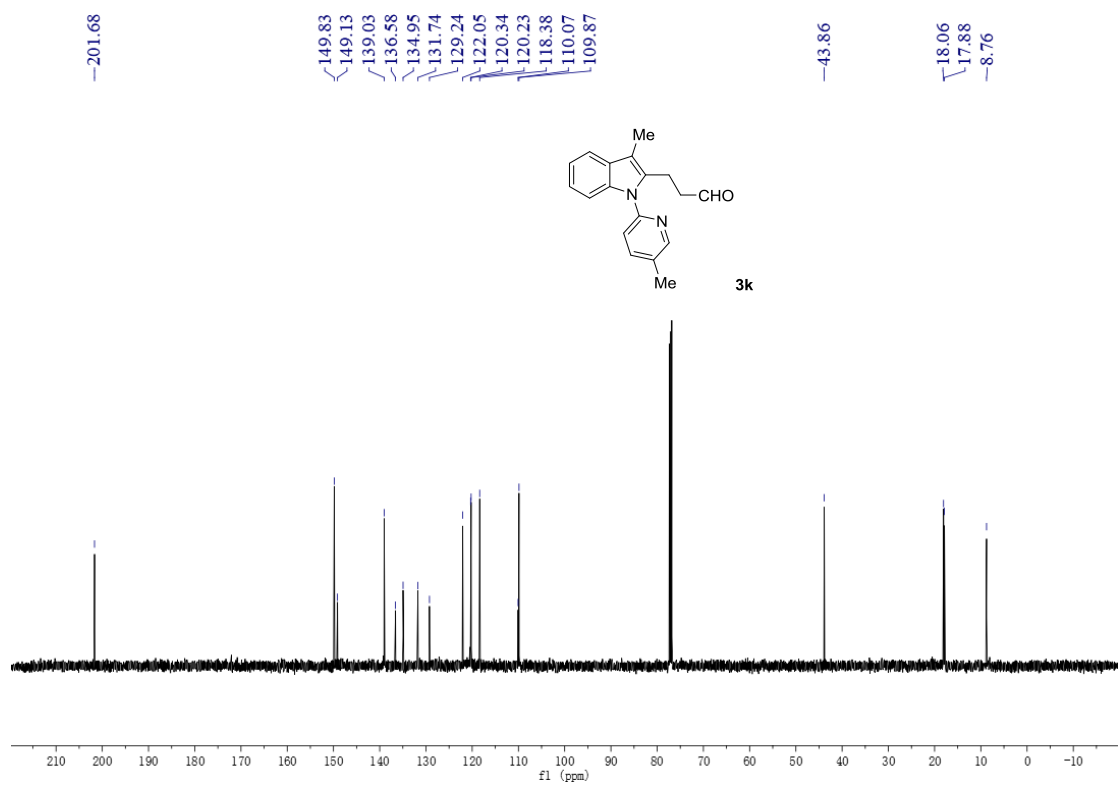

Supplementary Fig. 185 | <sup>13</sup>C NMR (126 MHz) of compound 3k (using CDCl<sub>3</sub> as solvent)

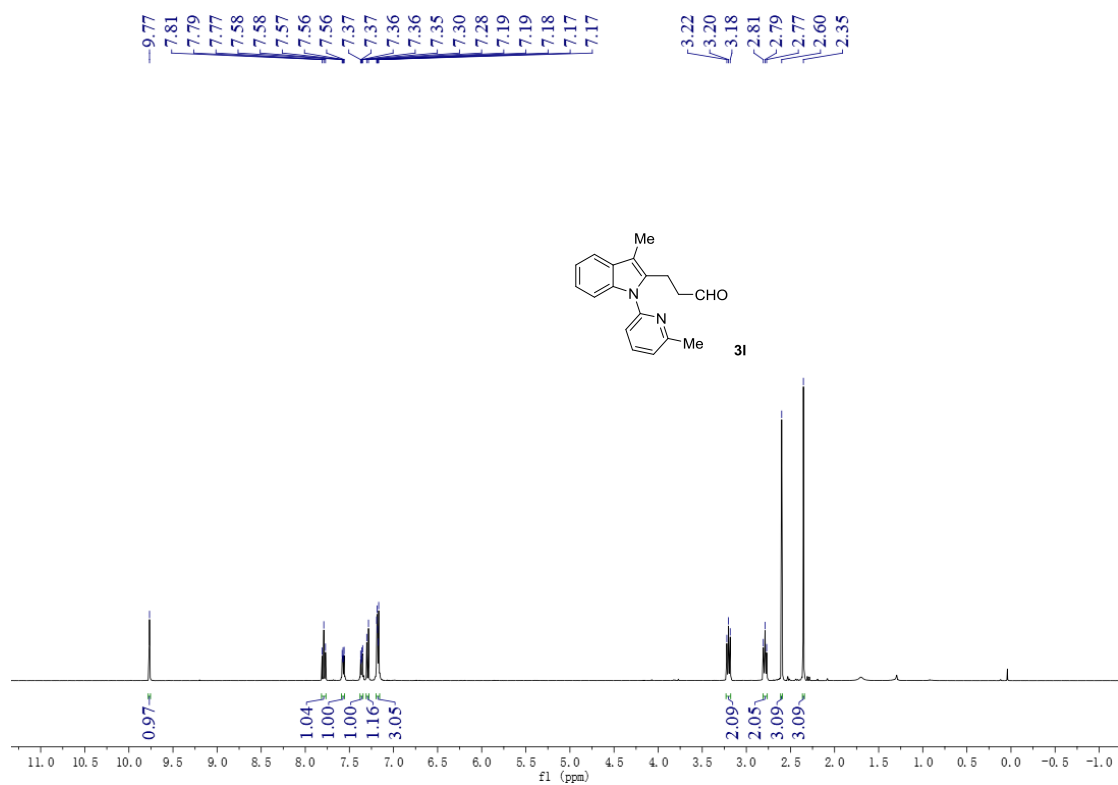

Supplementary Fig. 186 | <sup>1</sup>H NMR (400 MHz) of compound 3l (using CDCl<sub>3</sub> as solvent)

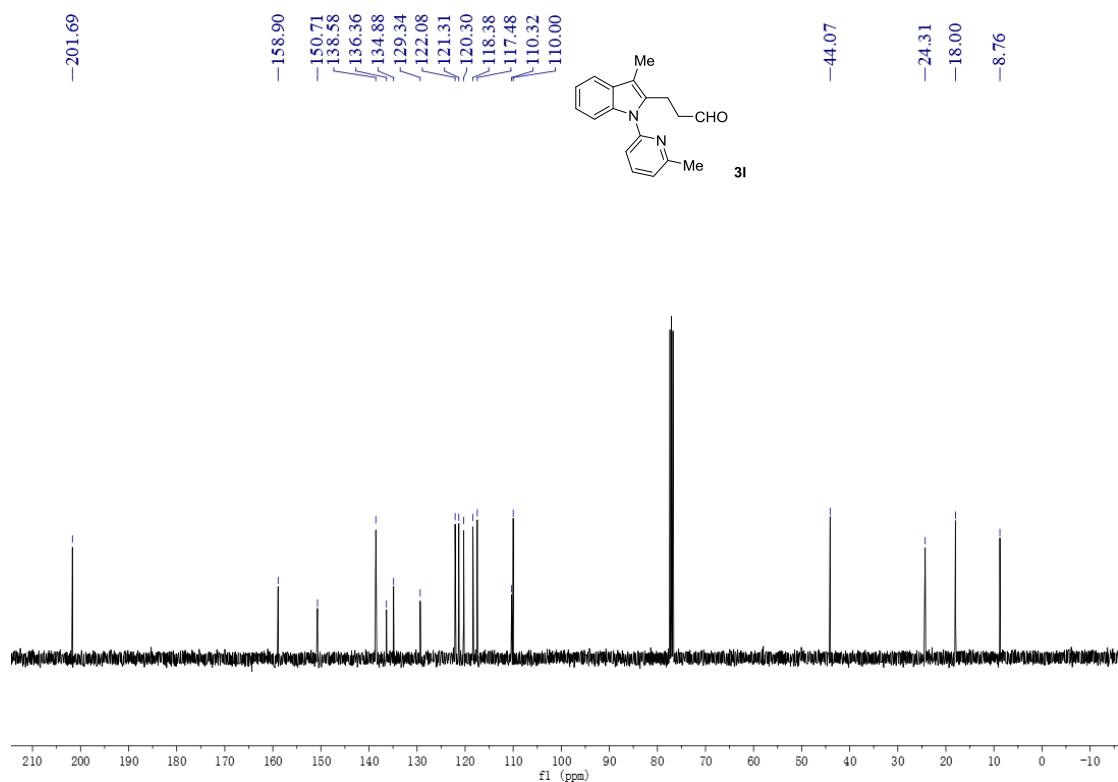

Supplementary Fig. 187 | <sup>13</sup>C NMR (101 MHz) of compound 3l (using CDCl<sub>3</sub> as solvent)



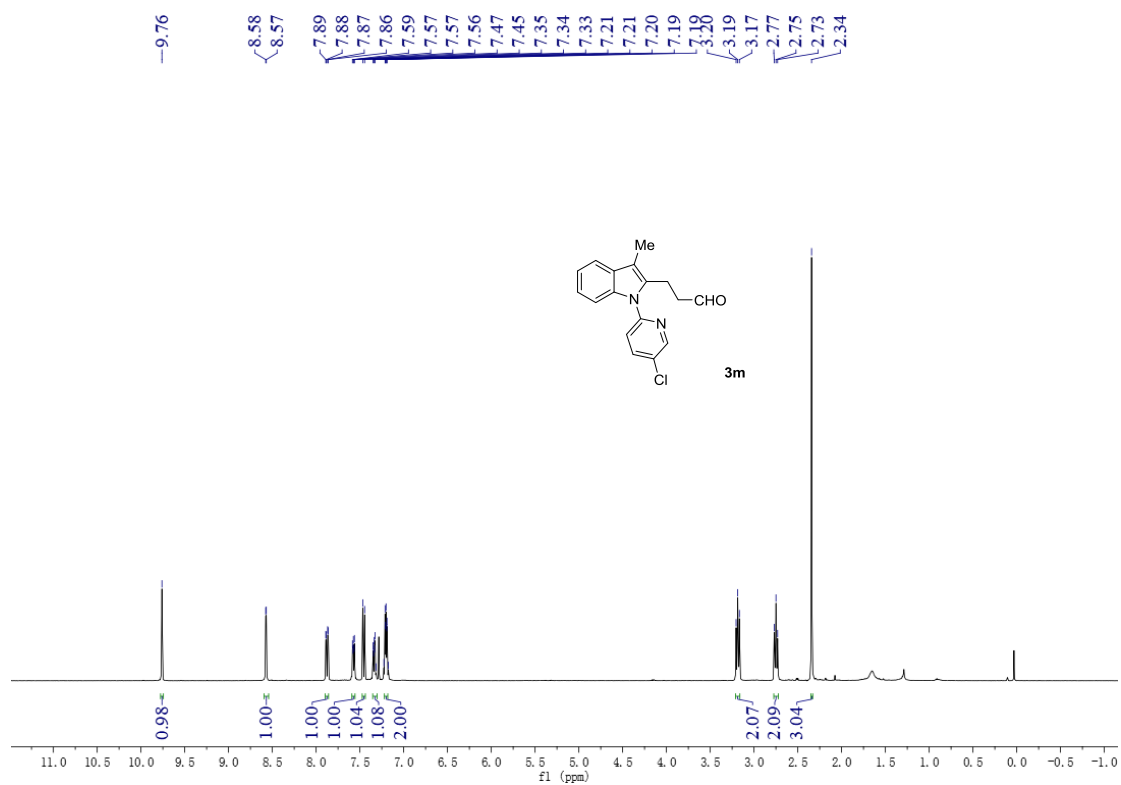

Supplementary Fig. 188 | <sup>1</sup>H NMR (400 MHz) of compound 3m (using CDCl<sub>3</sub> as solvent)

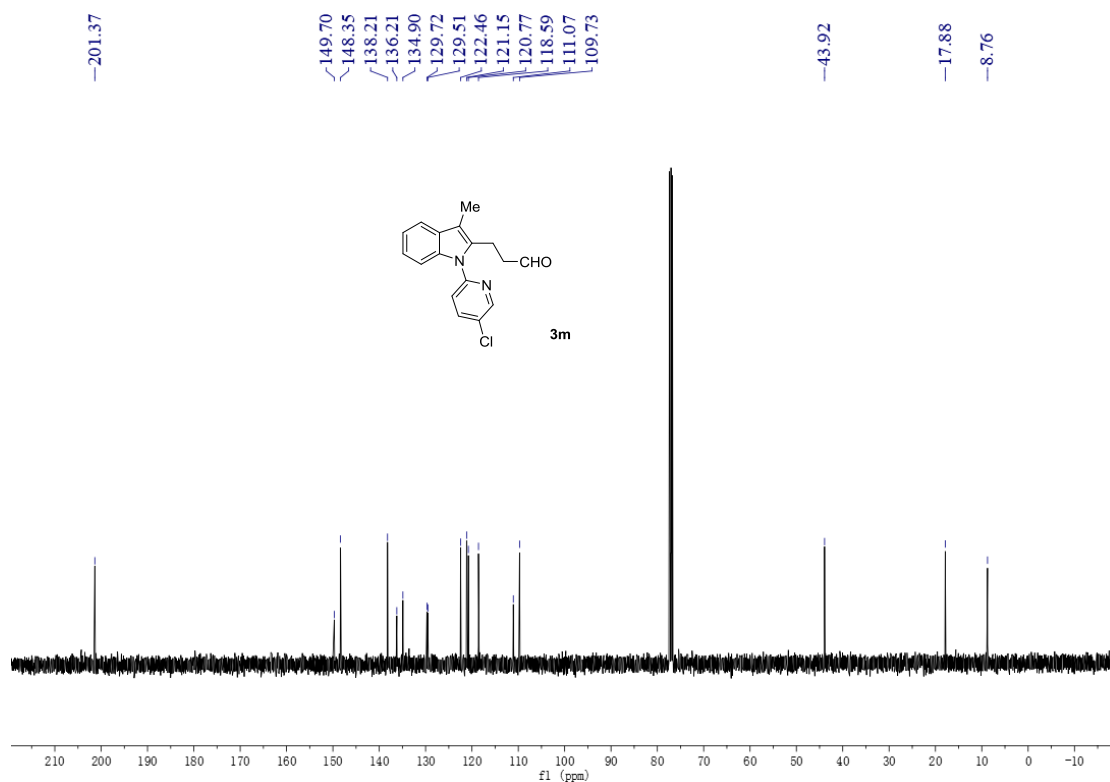

Supplementary Fig. 189 | <sup>13</sup>C NMR (101 MHz) of compound 3m (using CDCl<sub>3</sub> as solvent)

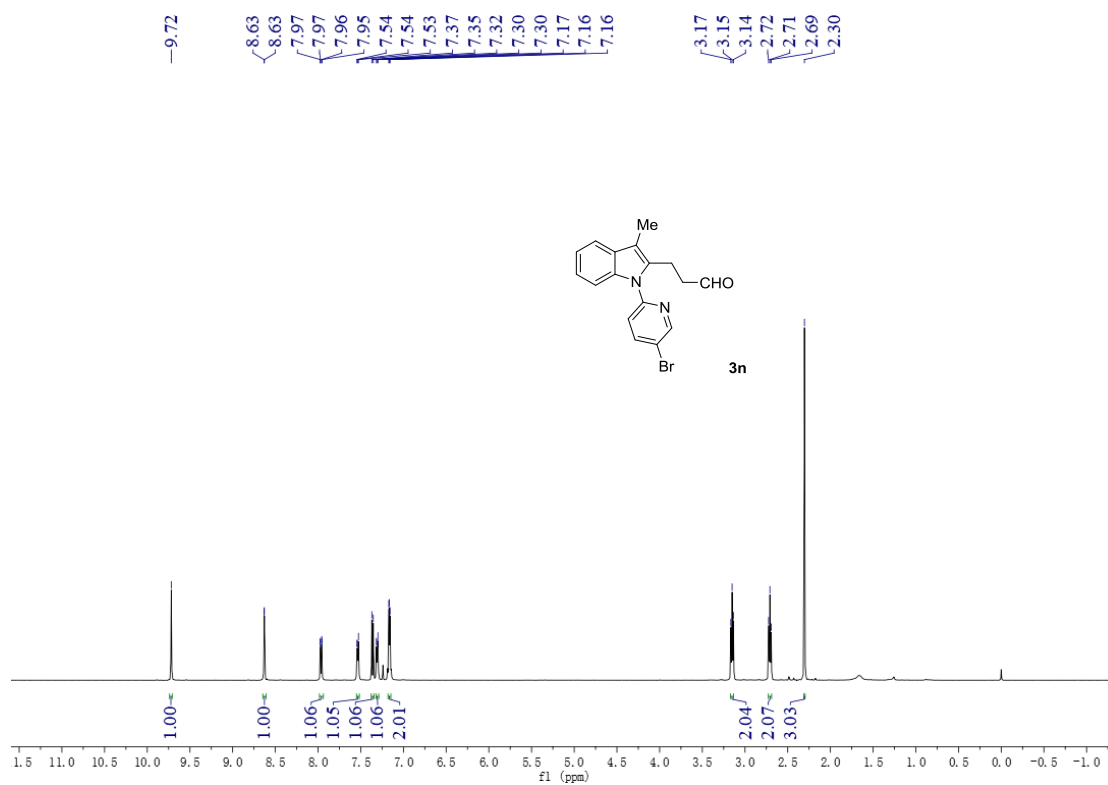

Supplementary Fig. 190 | <sup>1</sup>H NMR (500 MHz) of compound 3n (using CDCl<sub>3</sub> as solvent)

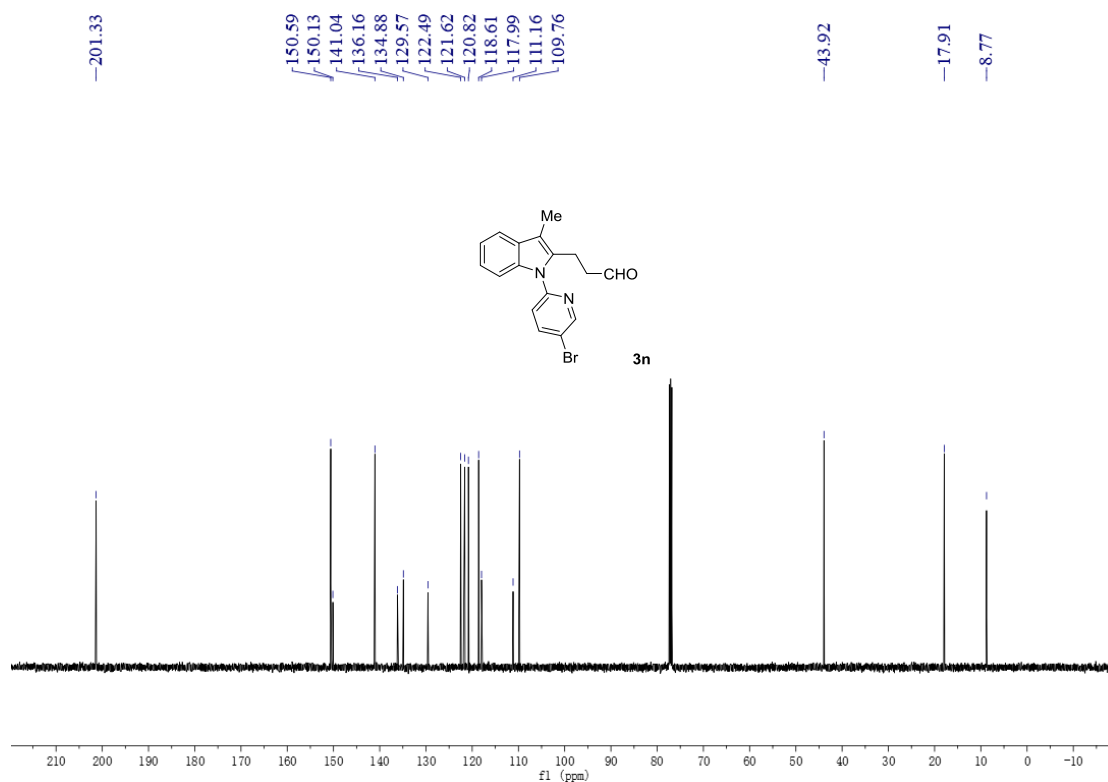

Supplementary Fig. 191 | <sup>13</sup>C NMR (126 MHz) of compound 3n (using CDCl<sub>3</sub> as solvent)

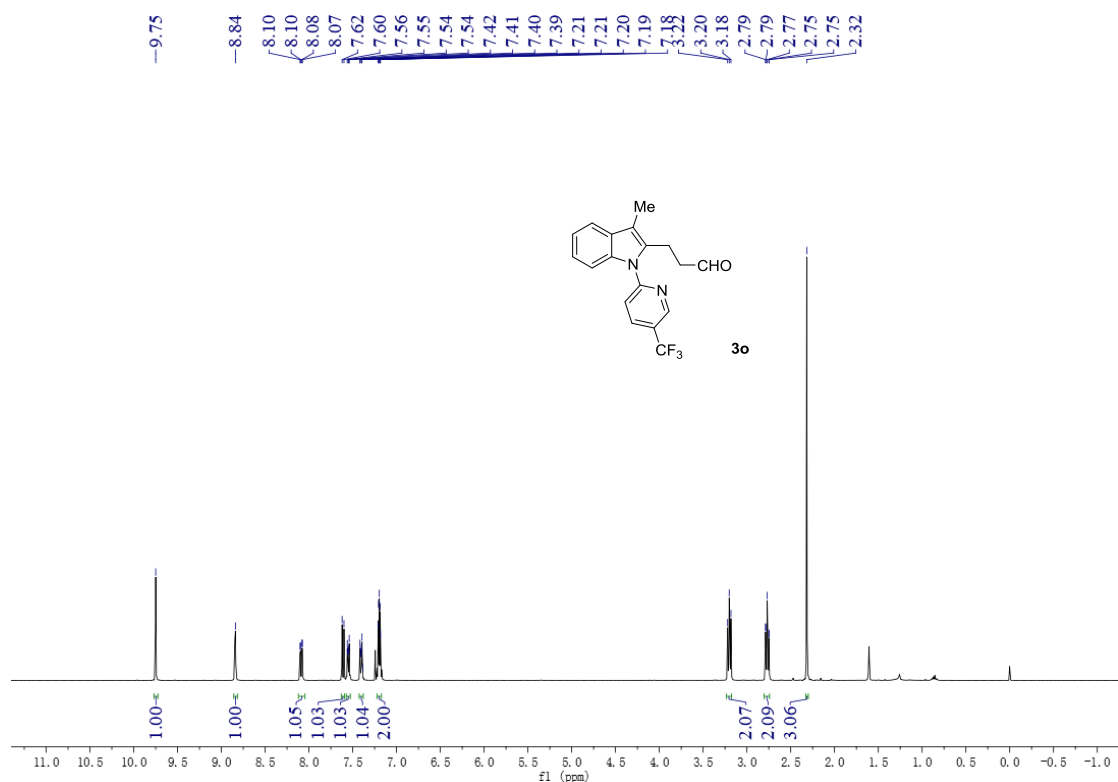

Supplementary Fig. 192 | <sup>1</sup>H NMR (400 MHz) of compound 3o (using CDCl<sub>3</sub> as solvent)

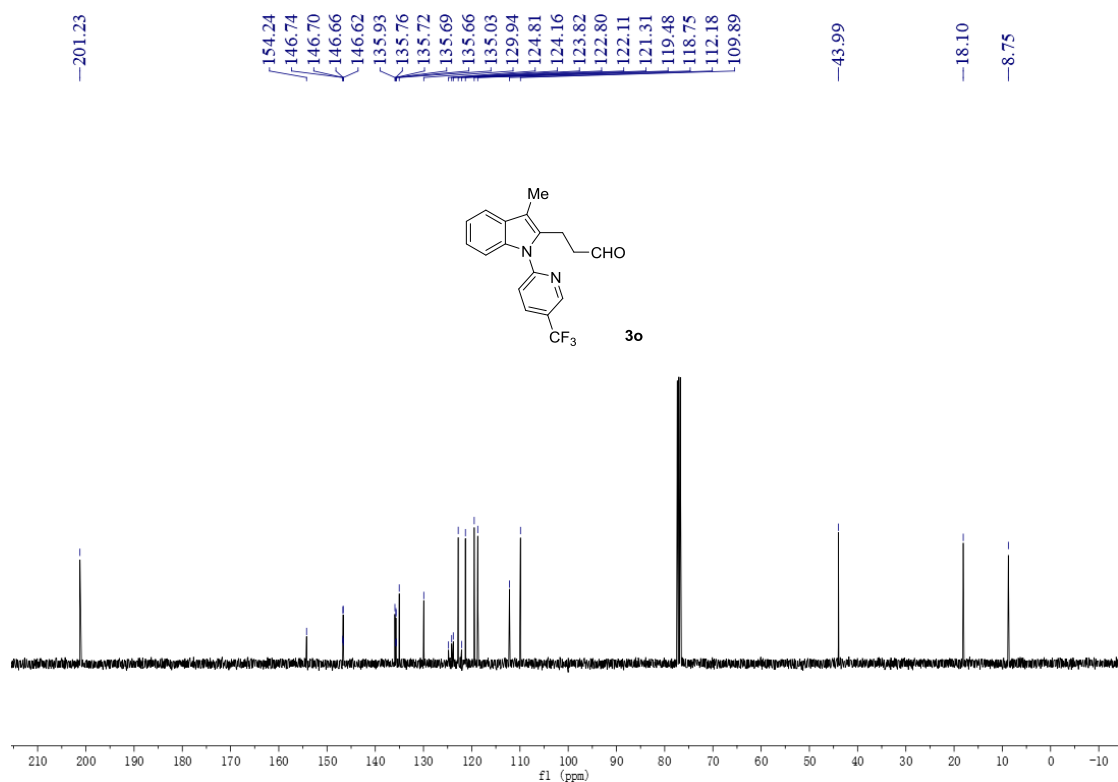

Supplementary Fig. 193 | <sup>13</sup>C NMR (101 MHz) of compound 3o (using CDCl<sub>3</sub> as solvent)

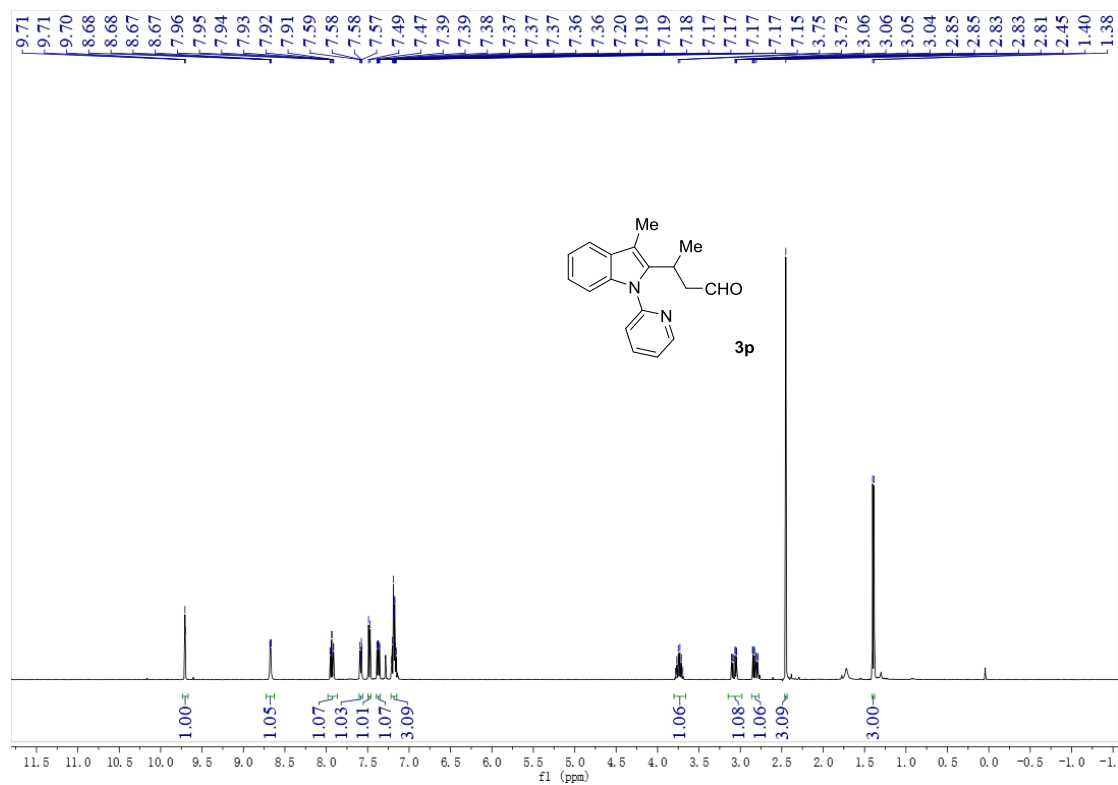

Supplementary Fig. 194 | <sup>1</sup>H NMR (400 MHz) of compound 3p (using CDCl<sub>3</sub> as solvent)

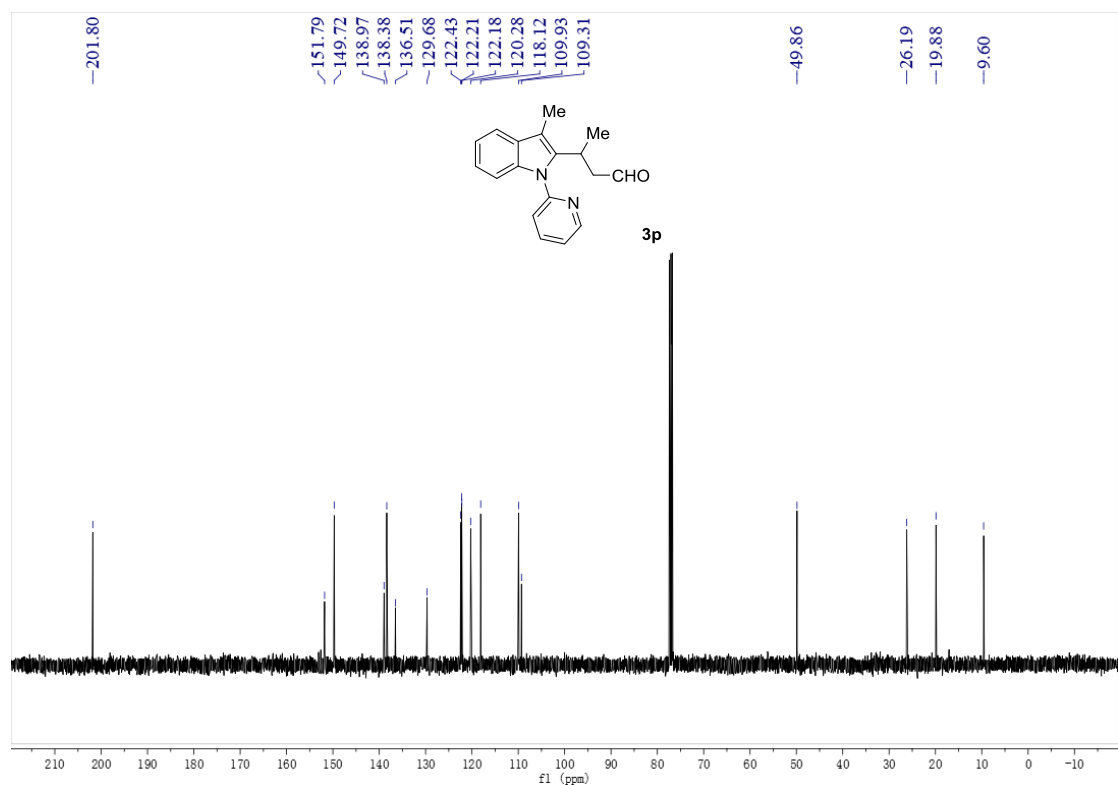

Supplementary Fig. 195 | <sup>13</sup>C NMR (101 MHz) of compound 3p (using CDCl<sub>3</sub> as solvent)

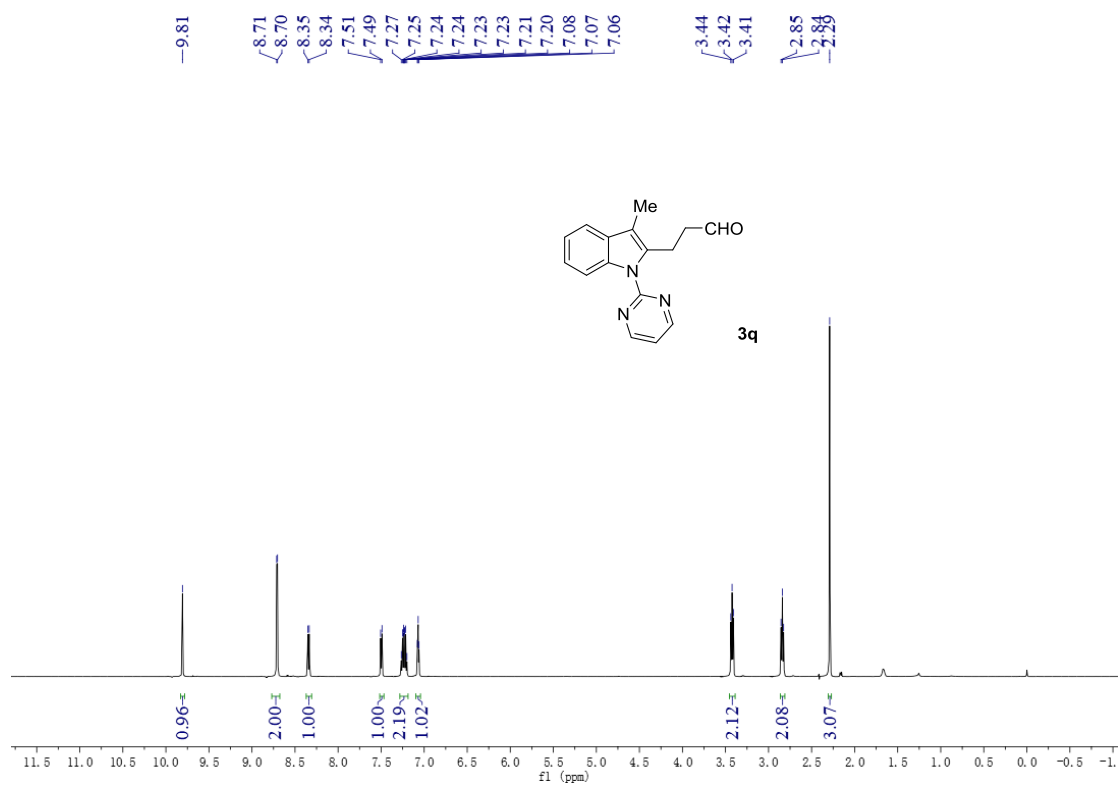

Supplementary Fig. 196 | <sup>1</sup>H NMR (500 MHz) of compound 3q (using CDCl<sub>3</sub> as solvent)

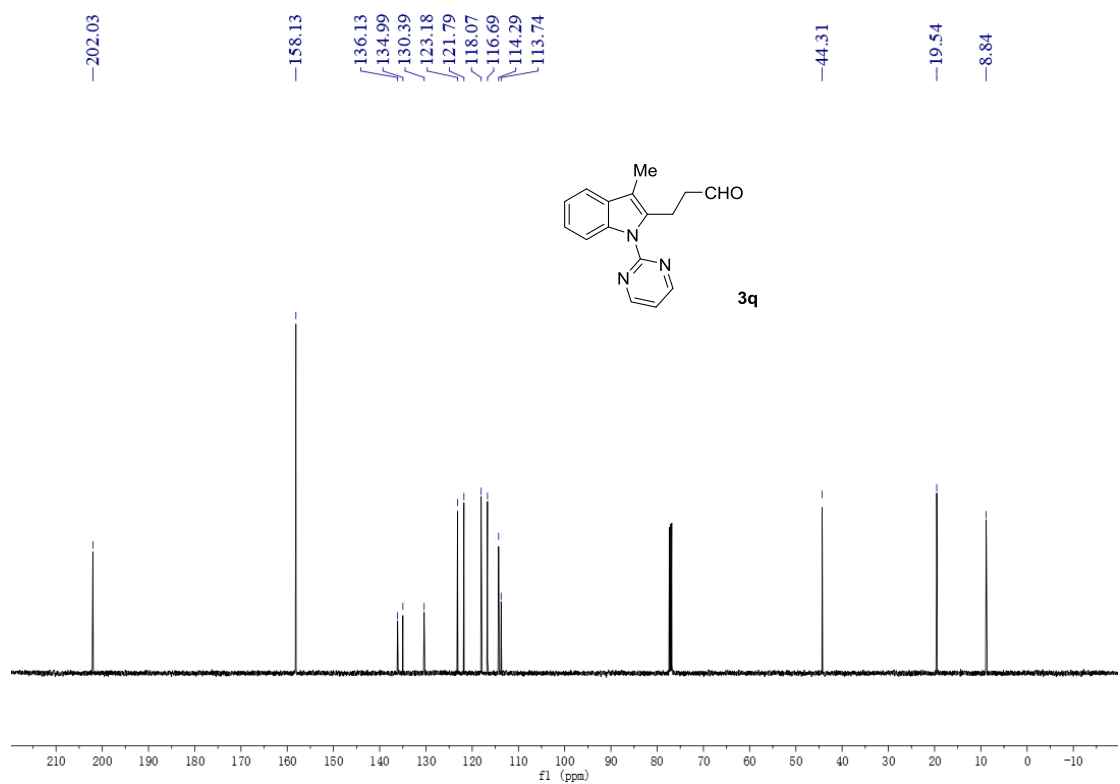

Supplementary Fig. 197 | <sup>13</sup>C NMR (126 MHz) of compound 3q (using CDCl<sub>3</sub> as solvent)

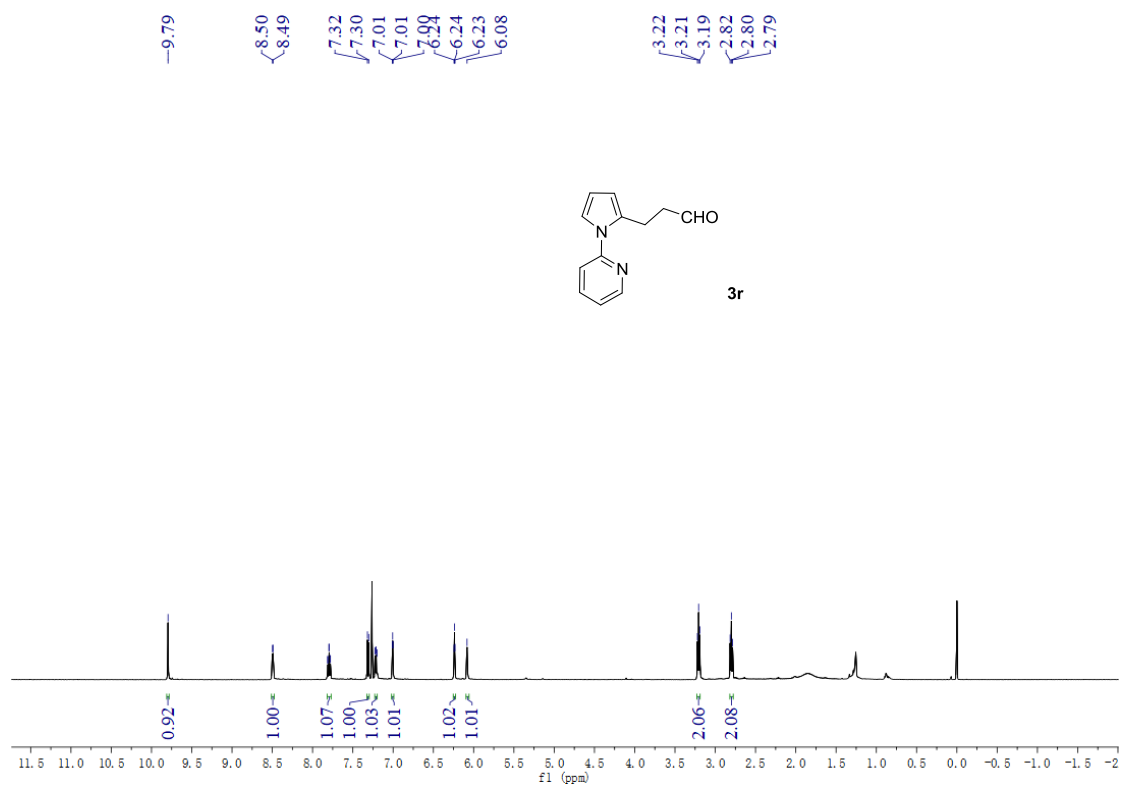

Supplementary Fig. 198 |  $^1\text{H}$  NMR (500 MHz) of compound **3r** (using  $\text{CDCl}_3$  as solvent)

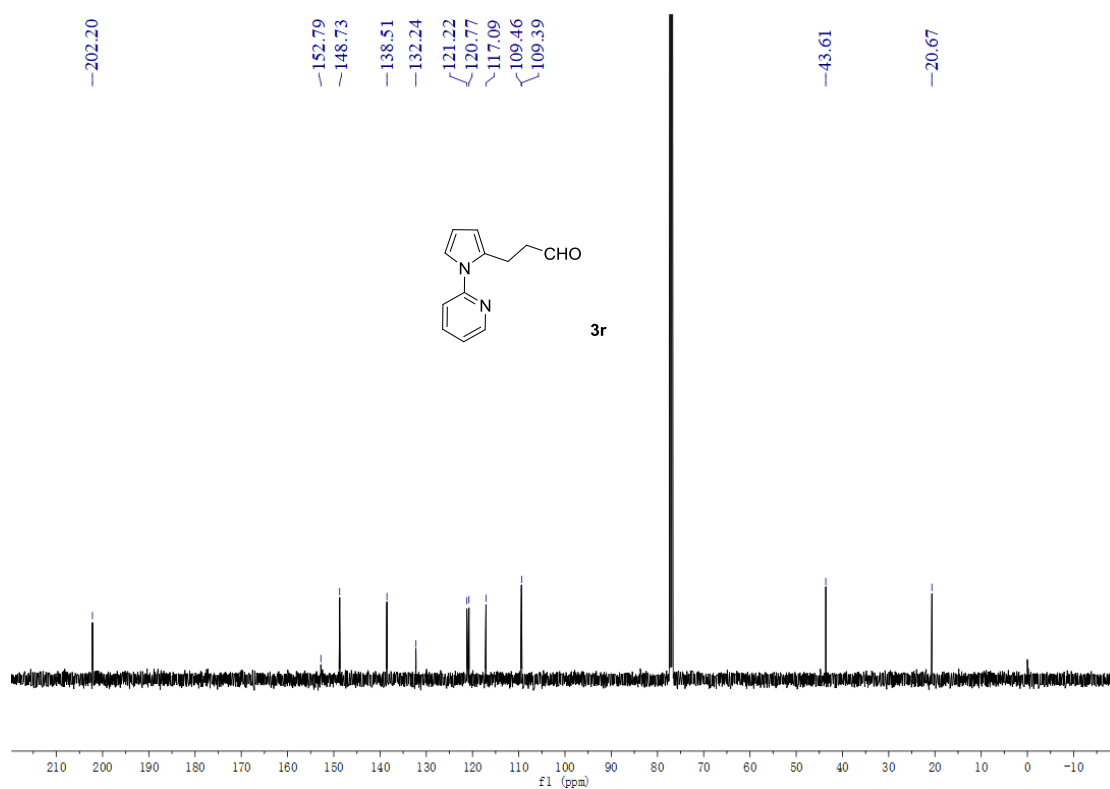

Supplementary Fig. 199 |  $^{13}\text{C}$  NMR (126 MHz) of compound **3r** (using  $\text{CDCl}_3$  as solvent)

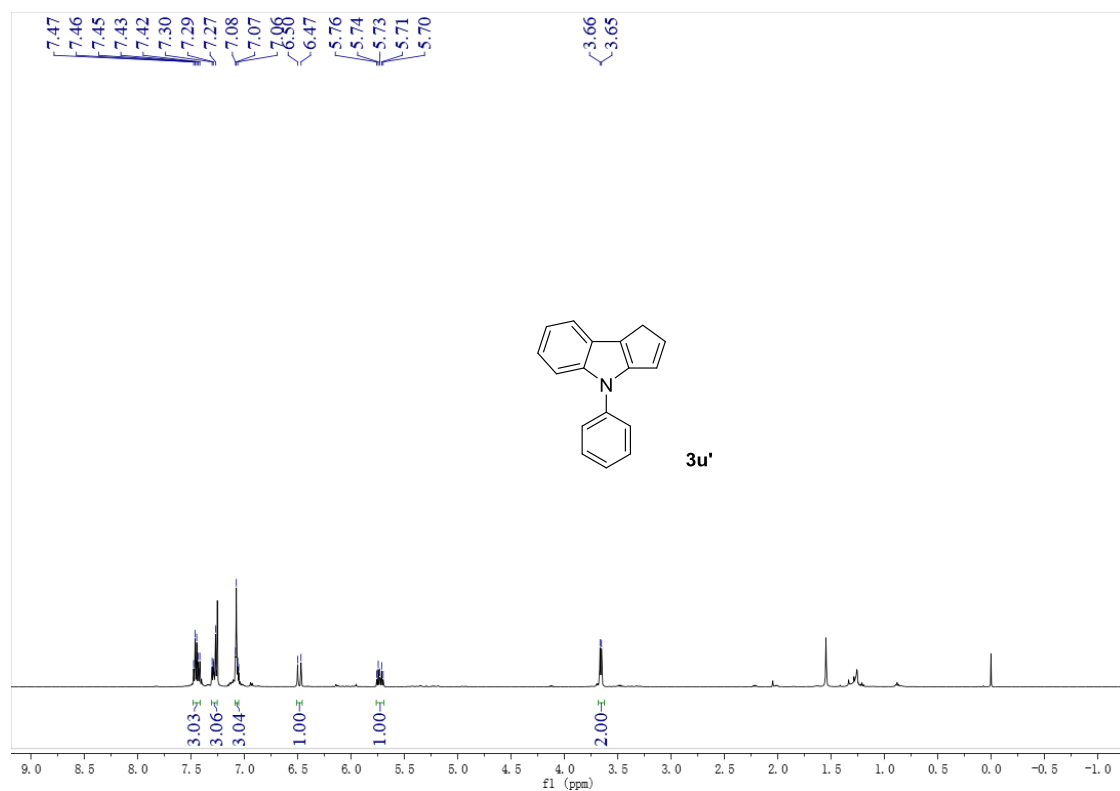

Supplementary Fig. 200 | <sup>1</sup>H NMR (500 MHz) of compound 3u' (using CDCl<sub>3</sub> as solvent)

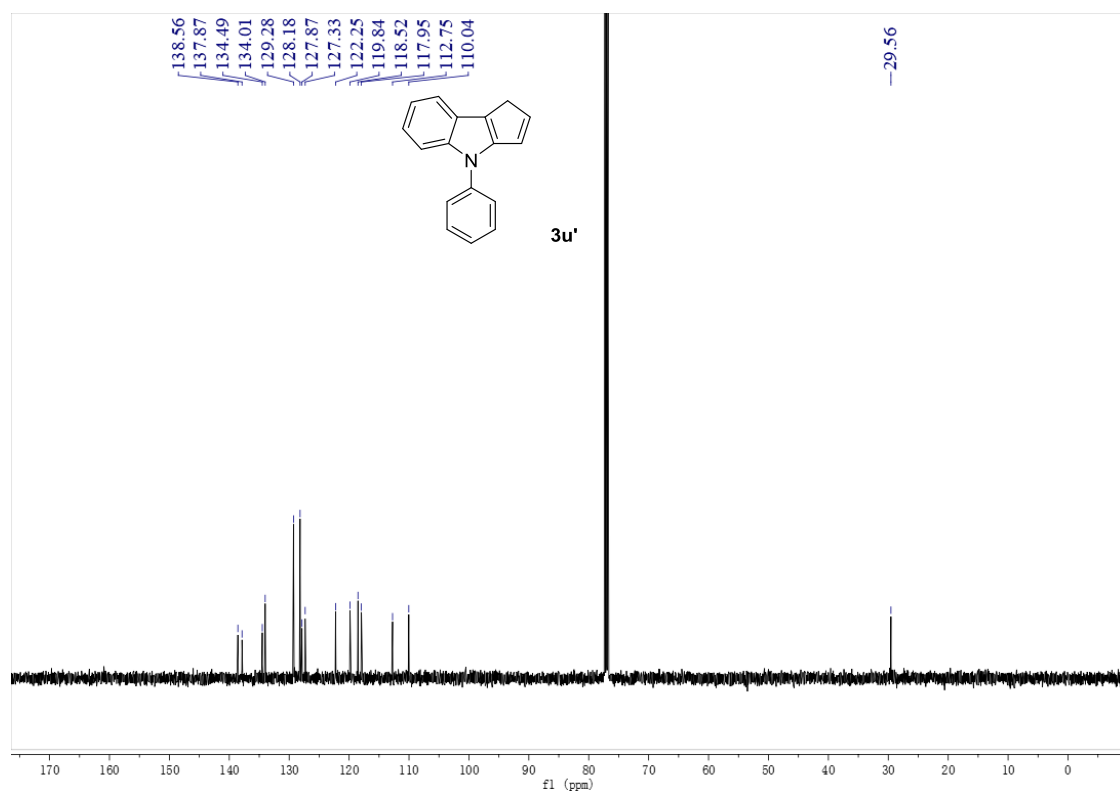

Supplementary Fig. 201 | <sup>13</sup>C NMR (126 MHz) of compound 3u' (using CDCl<sub>3</sub> as solvent)

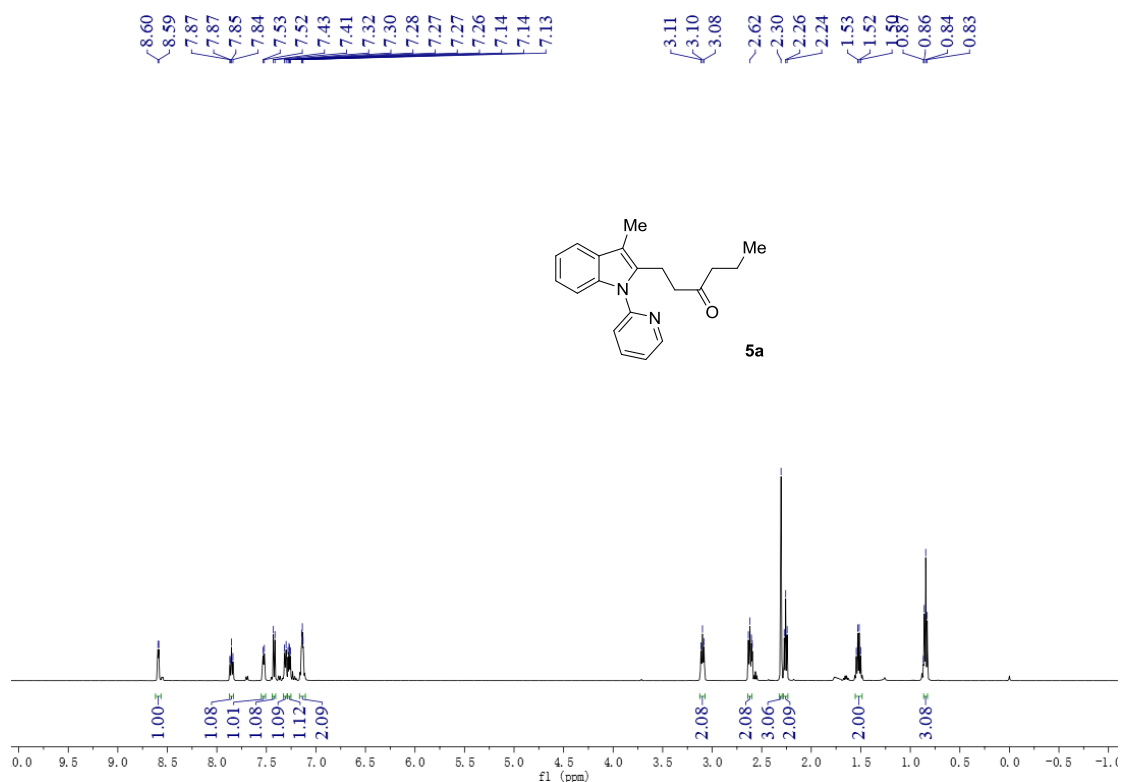

Supplementary Fig. 202 | <sup>1</sup>H NMR (500 MHz) of compound **5a** (using CDCl<sub>3</sub> as solvent)

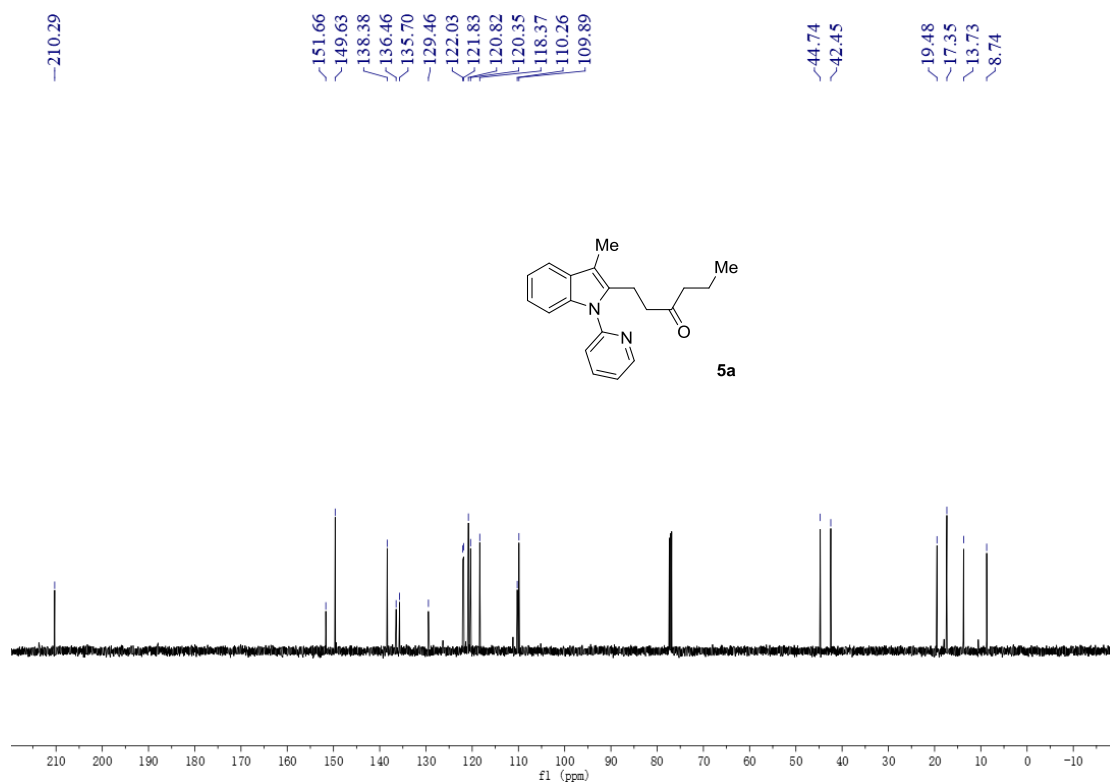

Supplementary Fig. 203 | <sup>13</sup>C NMR (126 MHz) of compound **5a** (using CDCl<sub>3</sub> as solvent)



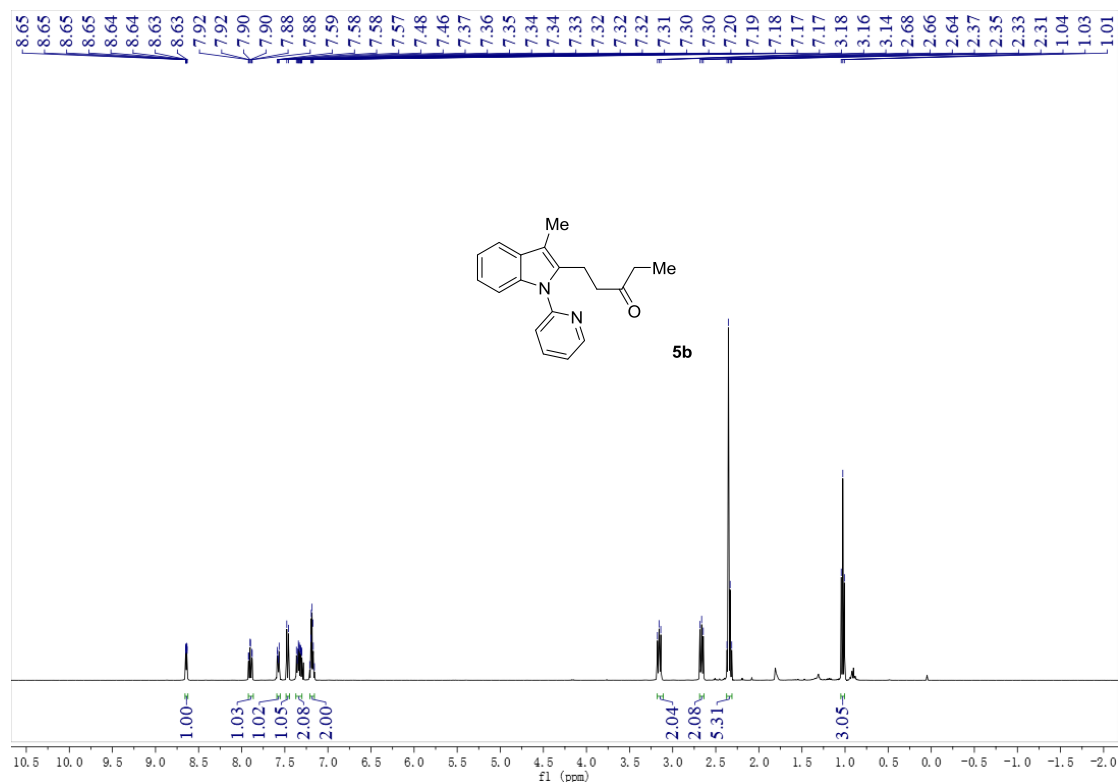

Supplementary Fig. 204 | <sup>1</sup>H NMR (400 MHz) of compound 5b (using CDCl<sub>3</sub> as solvent)

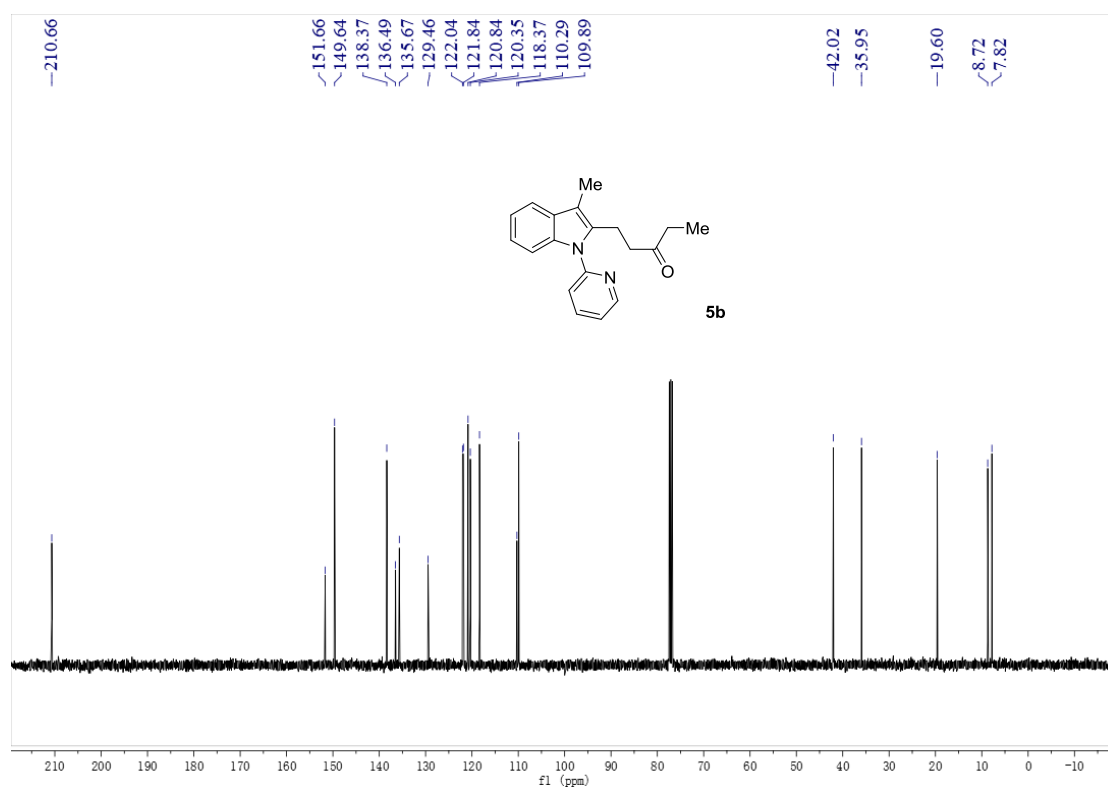

Supplementary Fig. 205 | <sup>13</sup>C NMR (101 MHz) of compound 5b (using CDCl<sub>3</sub> as solvent)

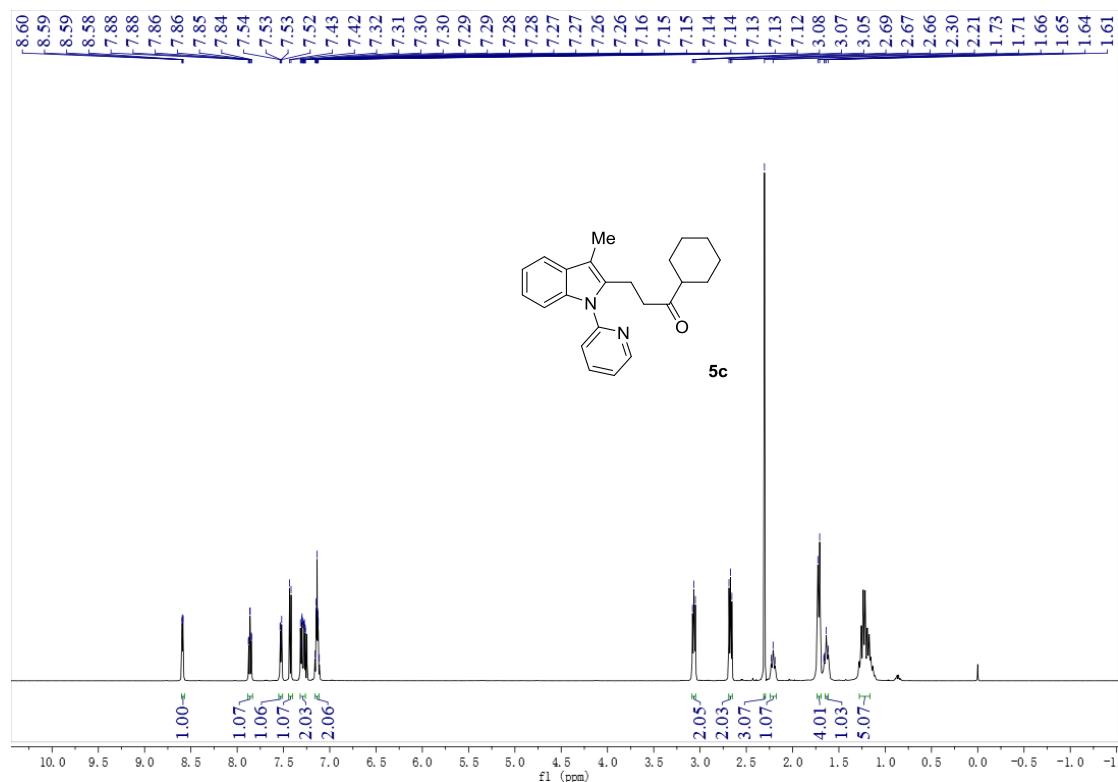

Supplementary Fig. 206 | <sup>1</sup>H NMR (500 MHz) of compound 5c (using CDCl<sub>3</sub> as solvent)

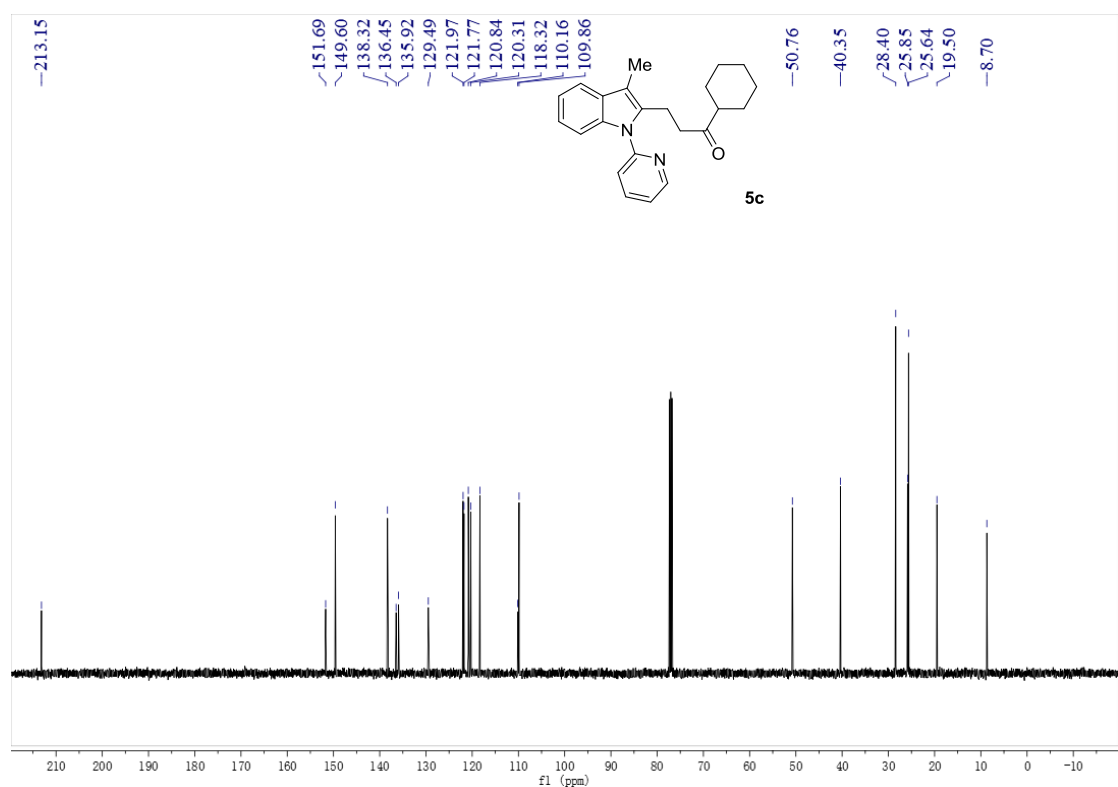

Supplementary Fig. 207 | <sup>13</sup>C NMR (126 MHz) of compound 5c (using CDCl<sub>3</sub> as solvent)

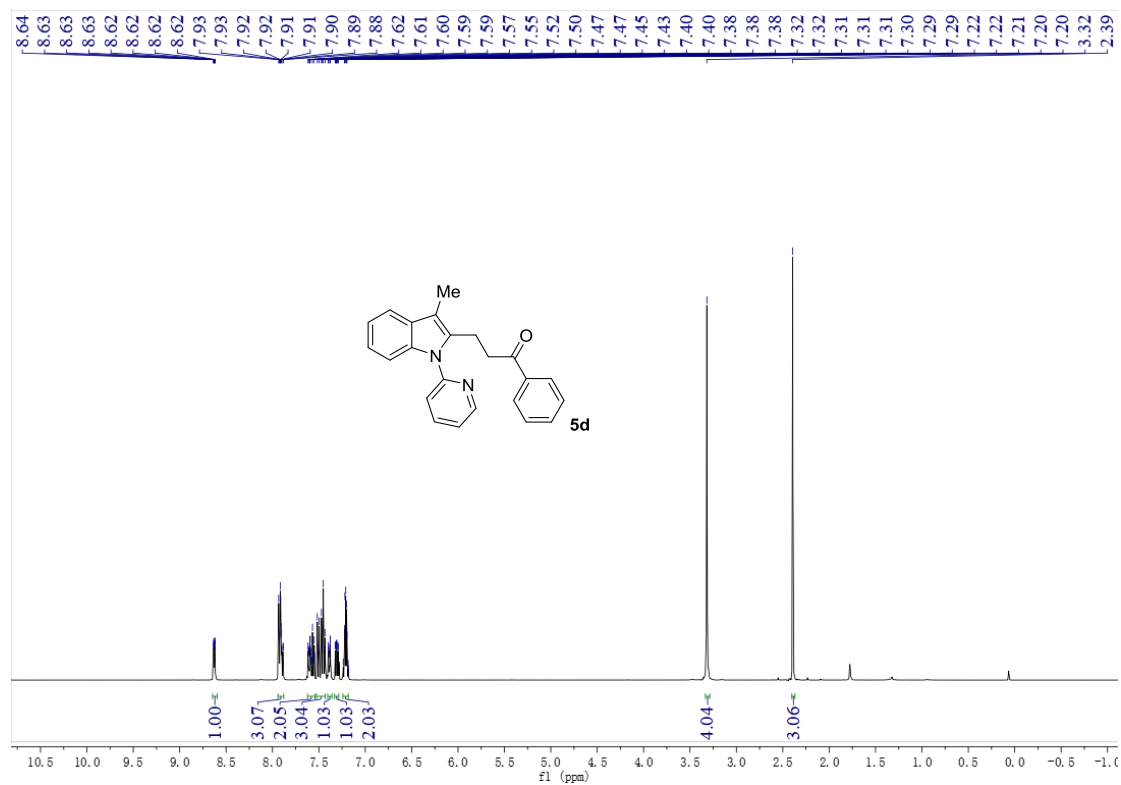

Supplementary Fig. 208 | <sup>1</sup>H NMR (400 MHz) of compound 5d (using CDCl<sub>3</sub> as solvent)

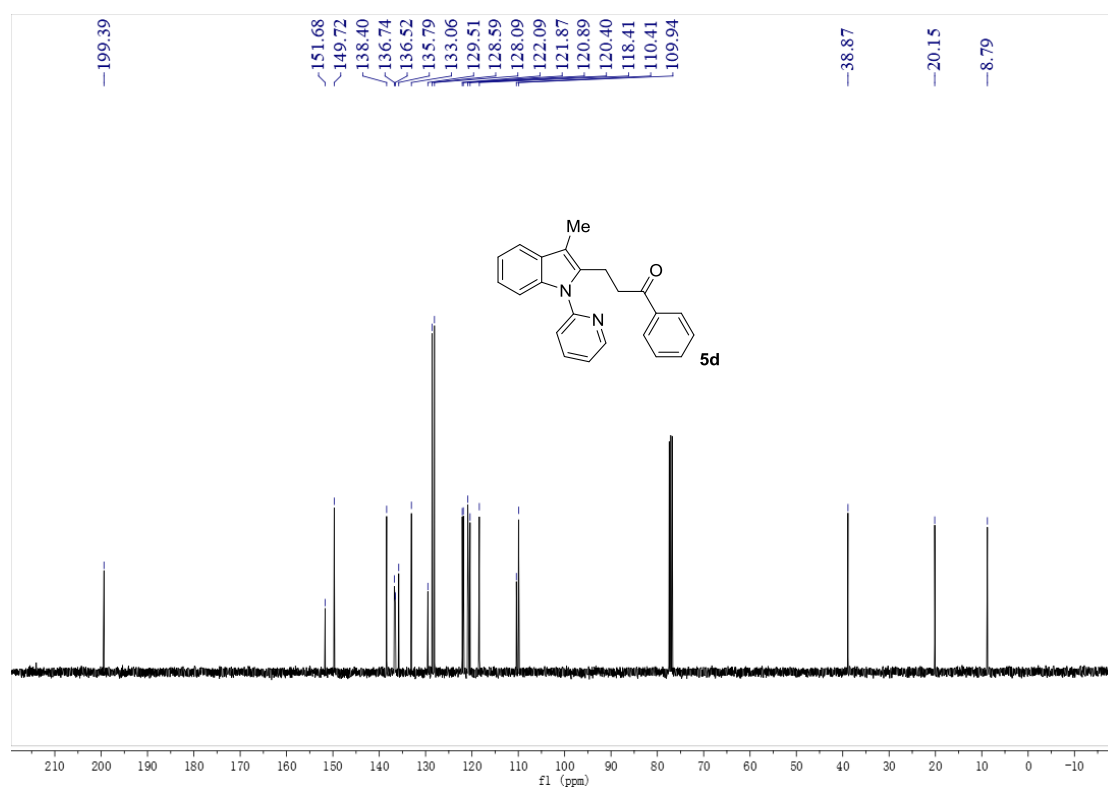

Supplementary Fig. 209 | <sup>13</sup>C NMR (101 MHz) of compound 5d (using CDCl<sub>3</sub> as solvent)

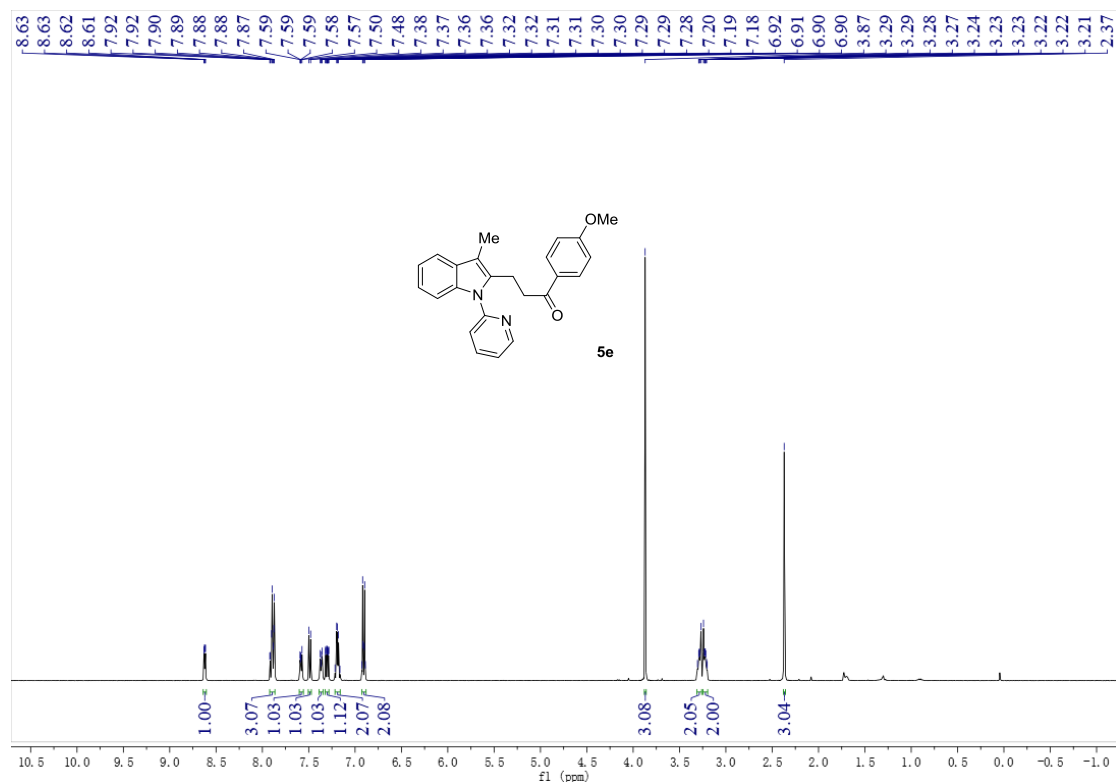

Supplementary Fig. 210 | <sup>1</sup>H NMR (400 MHz) of compound 5e (using CDCl<sub>3</sub> as solvent)

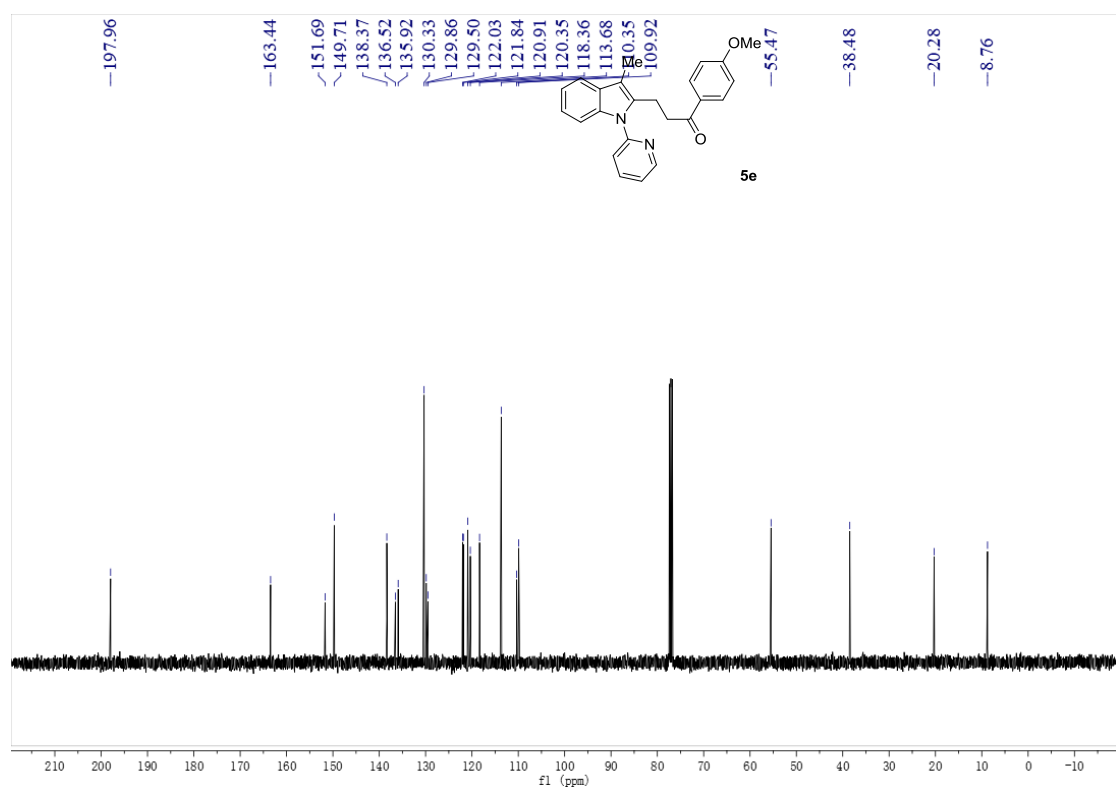

Supplementary Fig. 211 | <sup>13</sup>C NMR (101 MHz) of compound 5e (using CDCl<sub>3</sub> as solvent)

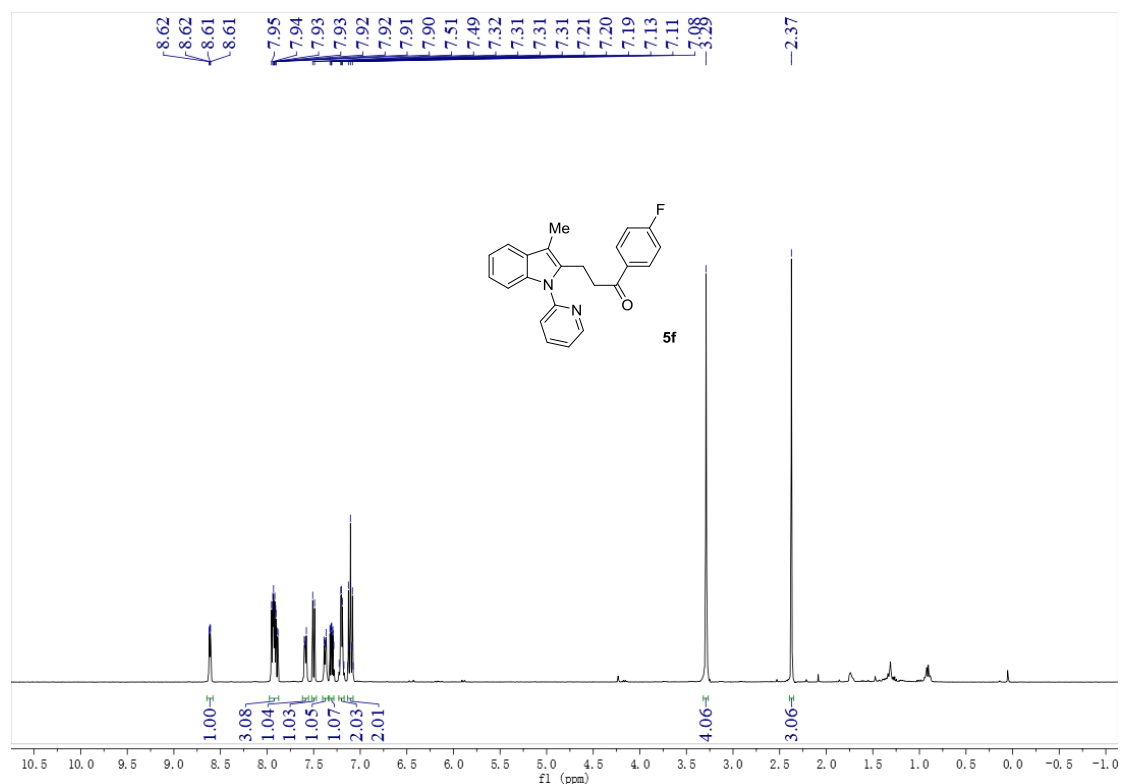

Supplementary Fig. 212 | <sup>1</sup>H NMR (400 MHz) of compound 5f (using CDCl<sub>3</sub> as solvent)

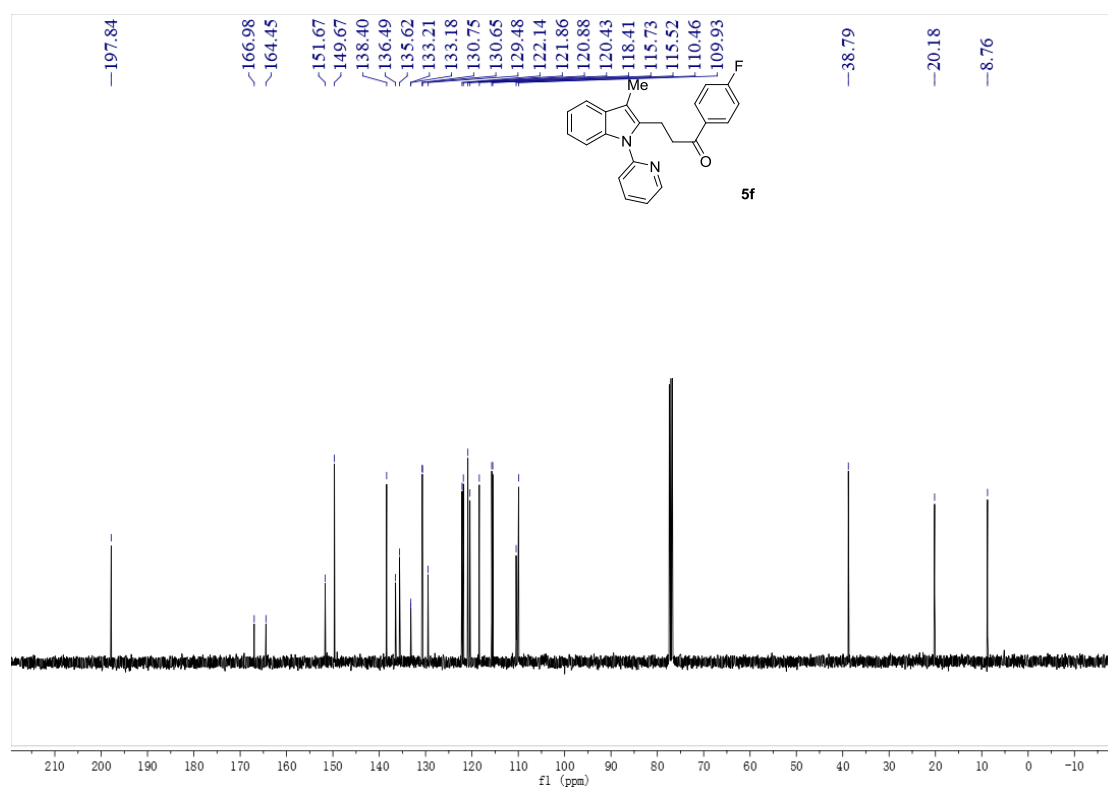

Supplementary Fig. 213 | <sup>13</sup>C NMR (101 MHz) of compound 5f (using CDCl<sub>3</sub> as solvent)

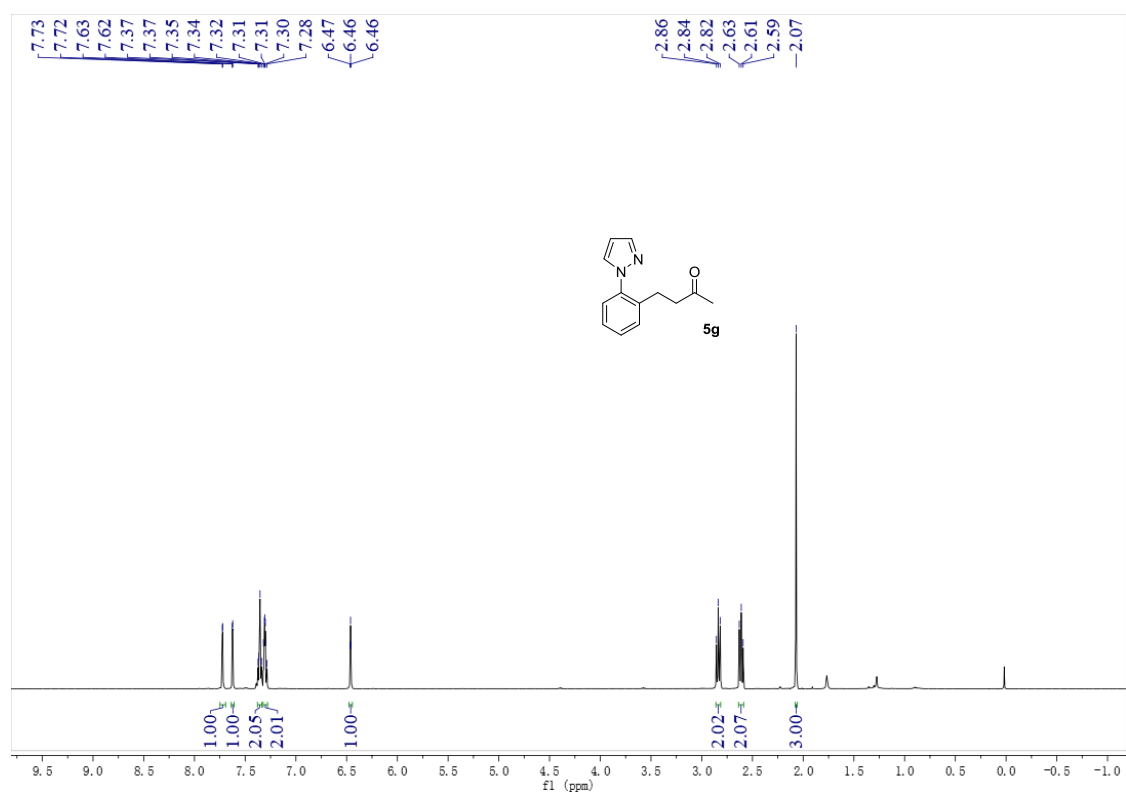

**Supplementary Fig. 214 | <sup>1</sup>H NMR (400 MHz) of compound 5g (using CDCl<sub>3</sub> as solvent)**

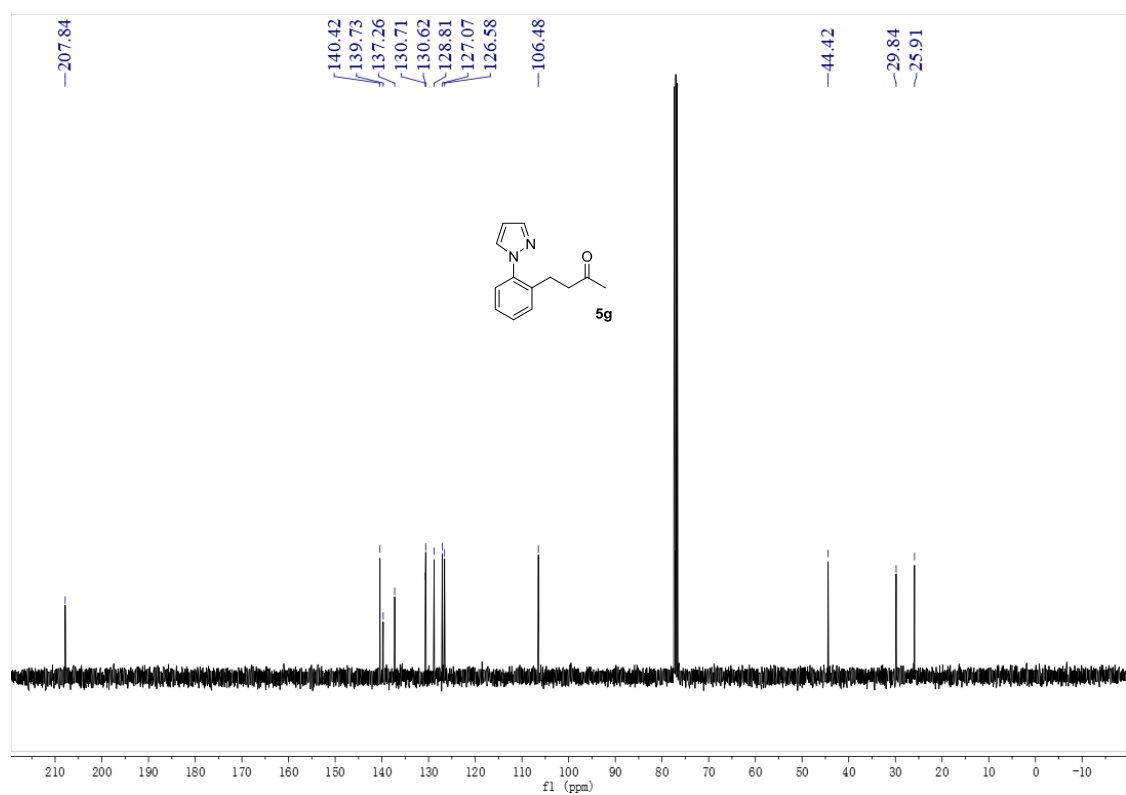

**Supplementary Fig. 215 | <sup>13</sup>C NMR (101 MHz) of compound 5g (using CDCl<sub>3</sub> as solvent)**

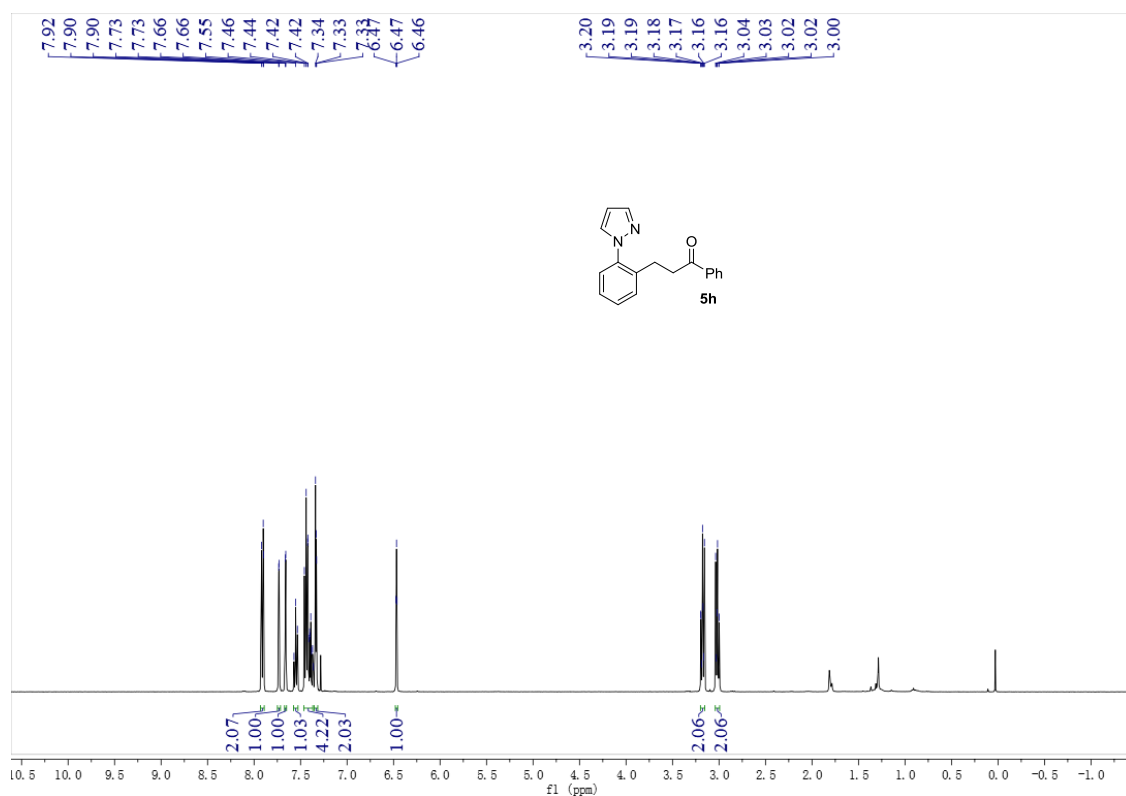

Supplementary Fig. 216 | <sup>1</sup>H NMR (400 MHz) of compound 5h (using CDCl<sub>3</sub> as solvent)

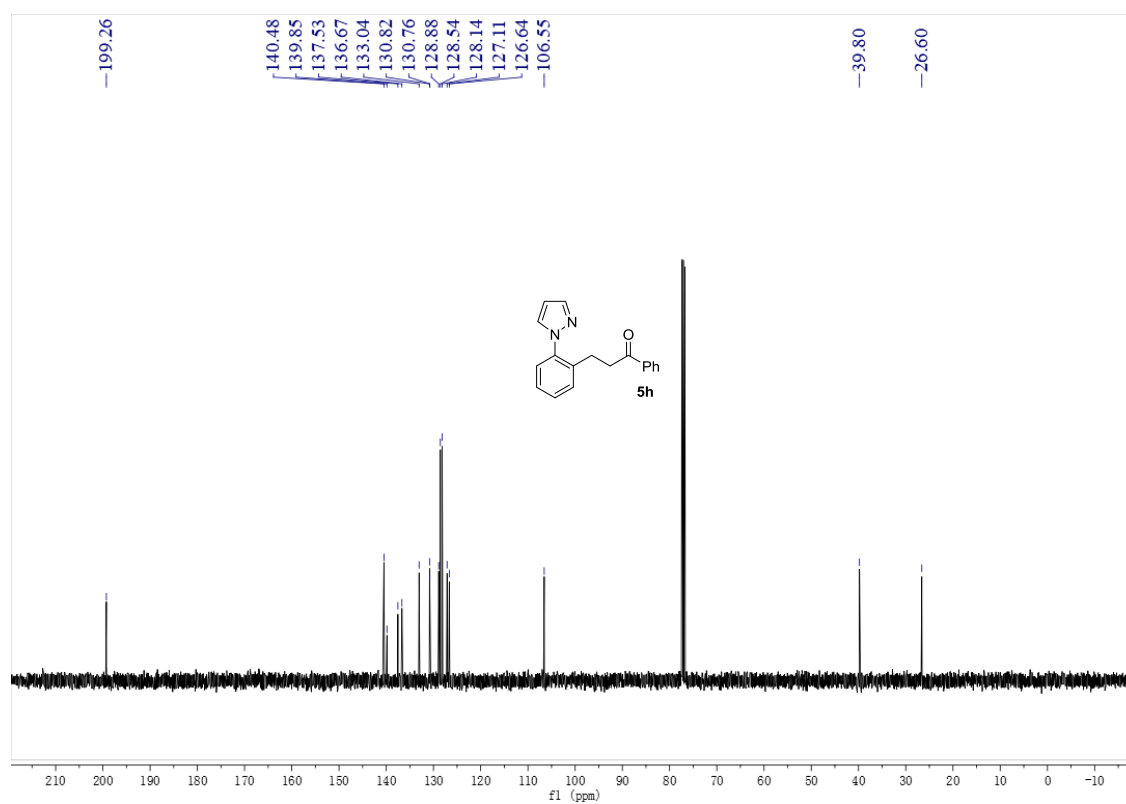

Supplementary Fig. 217 | <sup>13</sup>C NMR (101 MHz) of compound 5h (using CDCl<sub>3</sub> as solvent)

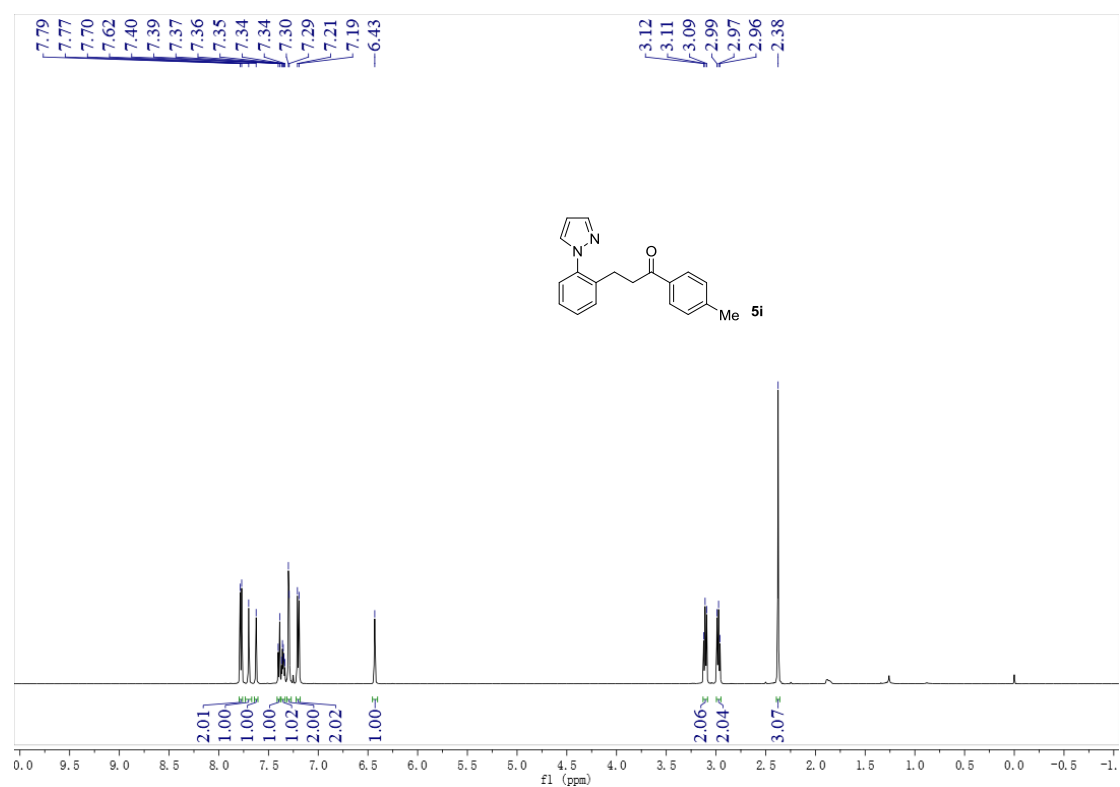

Supplementary Fig. 218 | <sup>1</sup>H NMR (500 MHz) of compound 5i (using CDCl<sub>3</sub> as solvent)

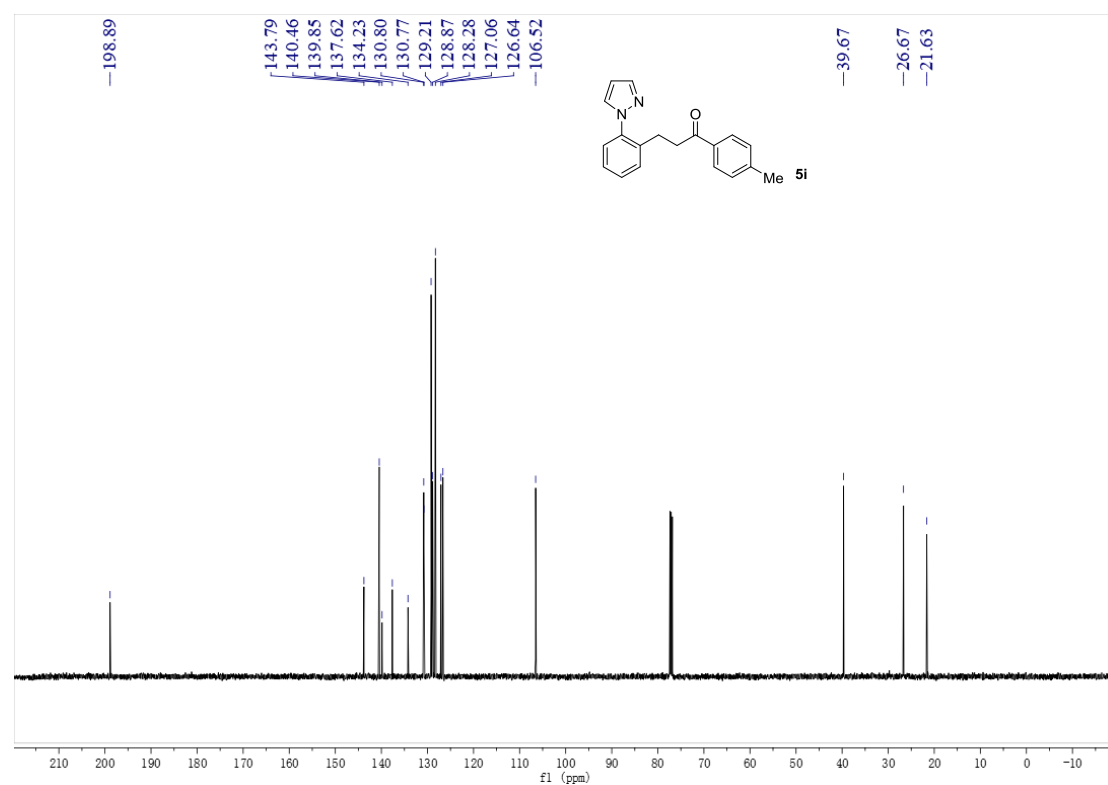

Supplementary Fig. 219 | <sup>13</sup>C NMR (126 MHz) of compound 5i (using CDCl<sub>3</sub> as solvent)



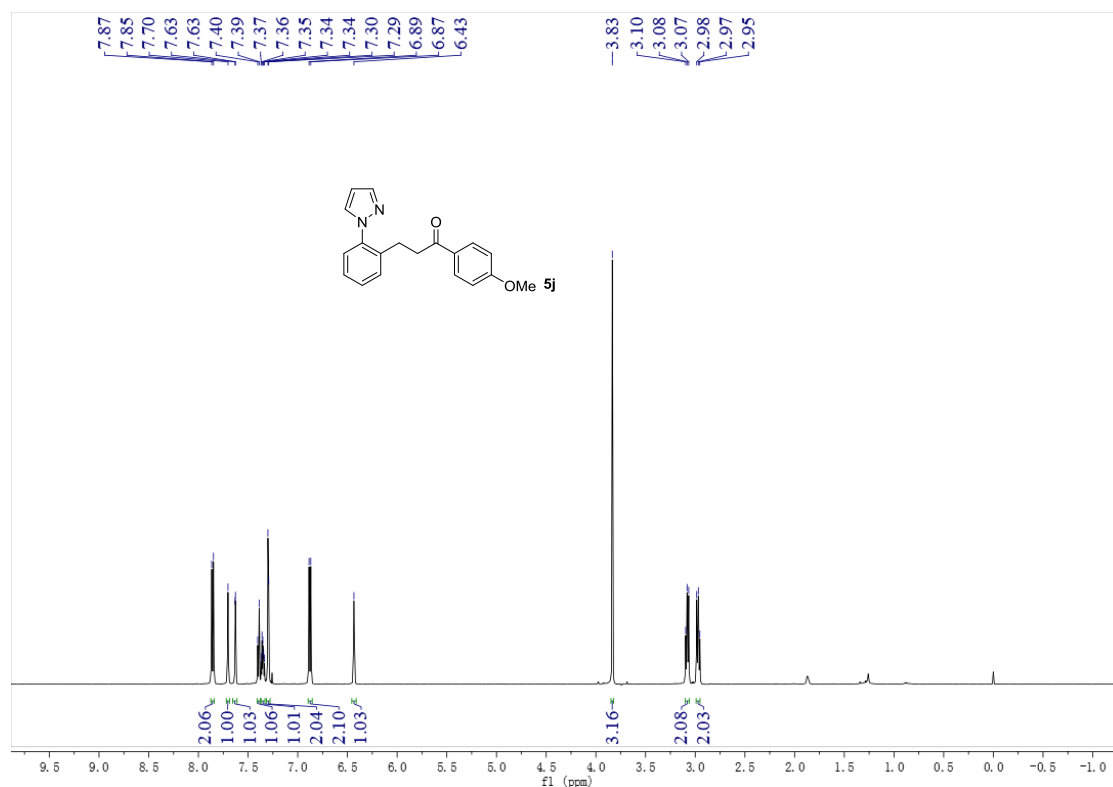

**Supplementary Fig. 220 | <sup>1</sup>H NMR (500 MHz) of compound 5j (using CDCl<sub>3</sub> as solvent)**

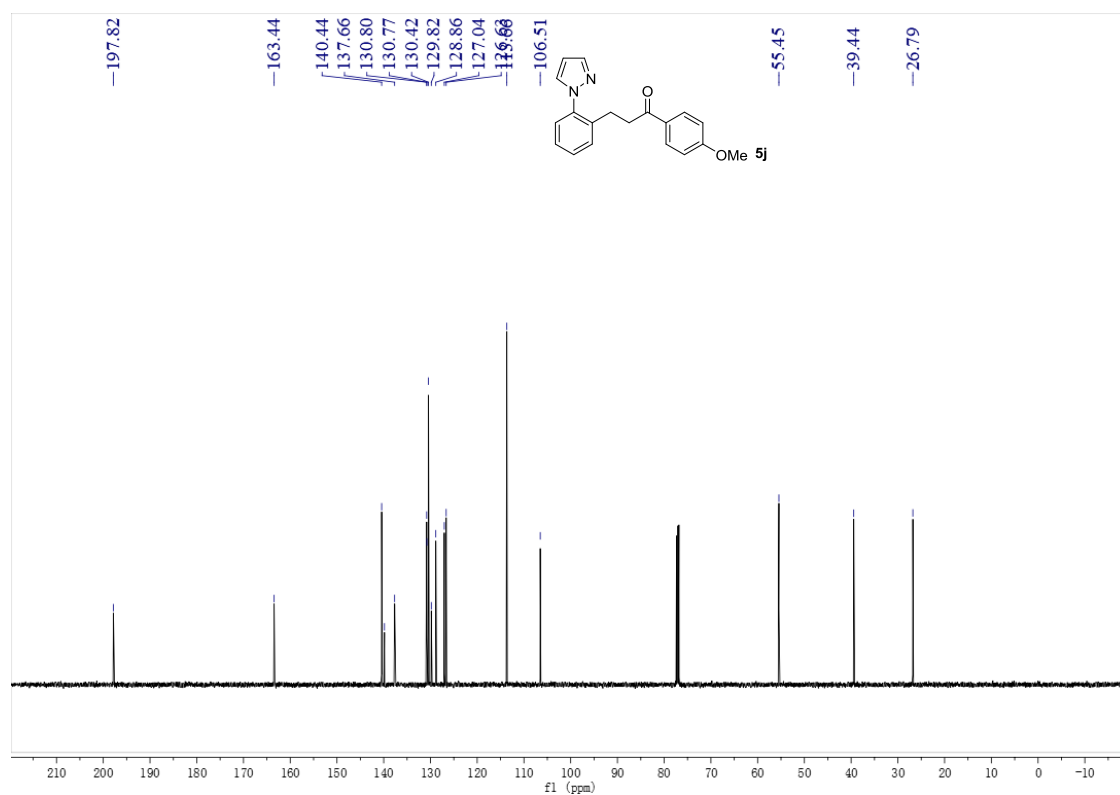

**Supplementary Fig. 221 | <sup>13</sup>C NMR (126 MHz) of compound 5j (using CDCl<sub>3</sub> as solvent)**

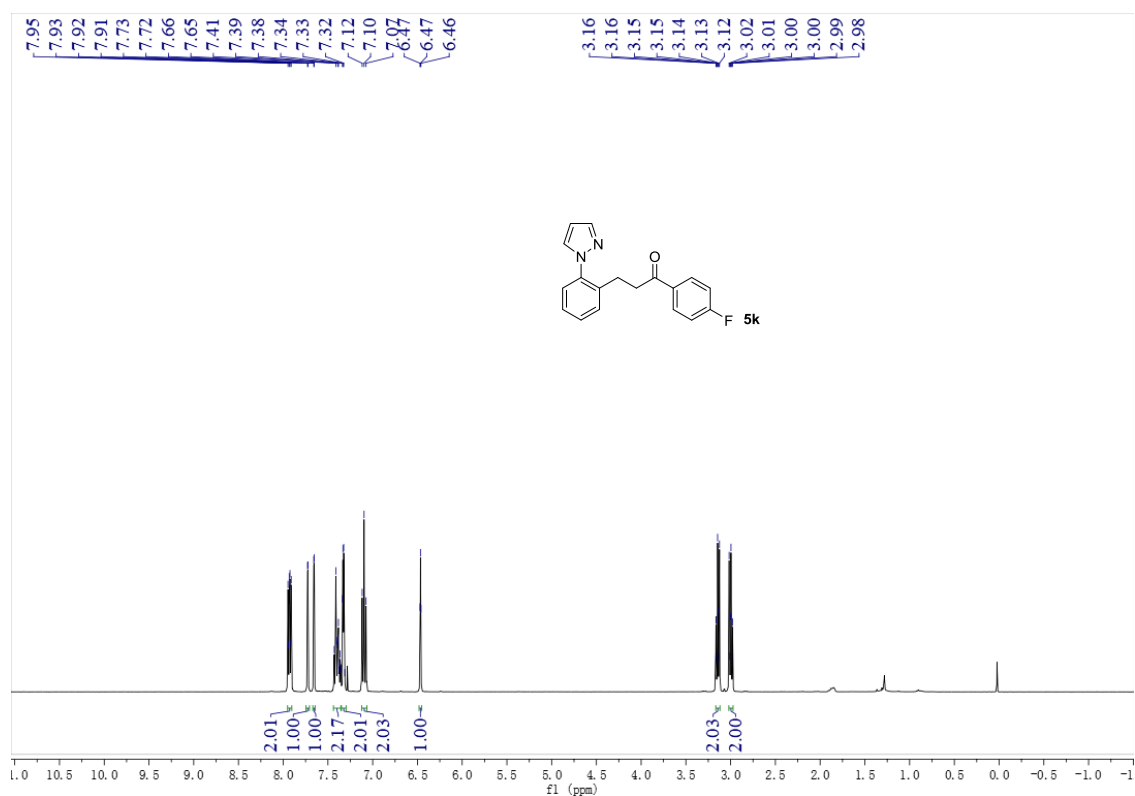

Supplementary Fig. 222 | <sup>1</sup>H NMR (400 MHz) of compound 5k (using CDCl<sub>3</sub> as solvent)

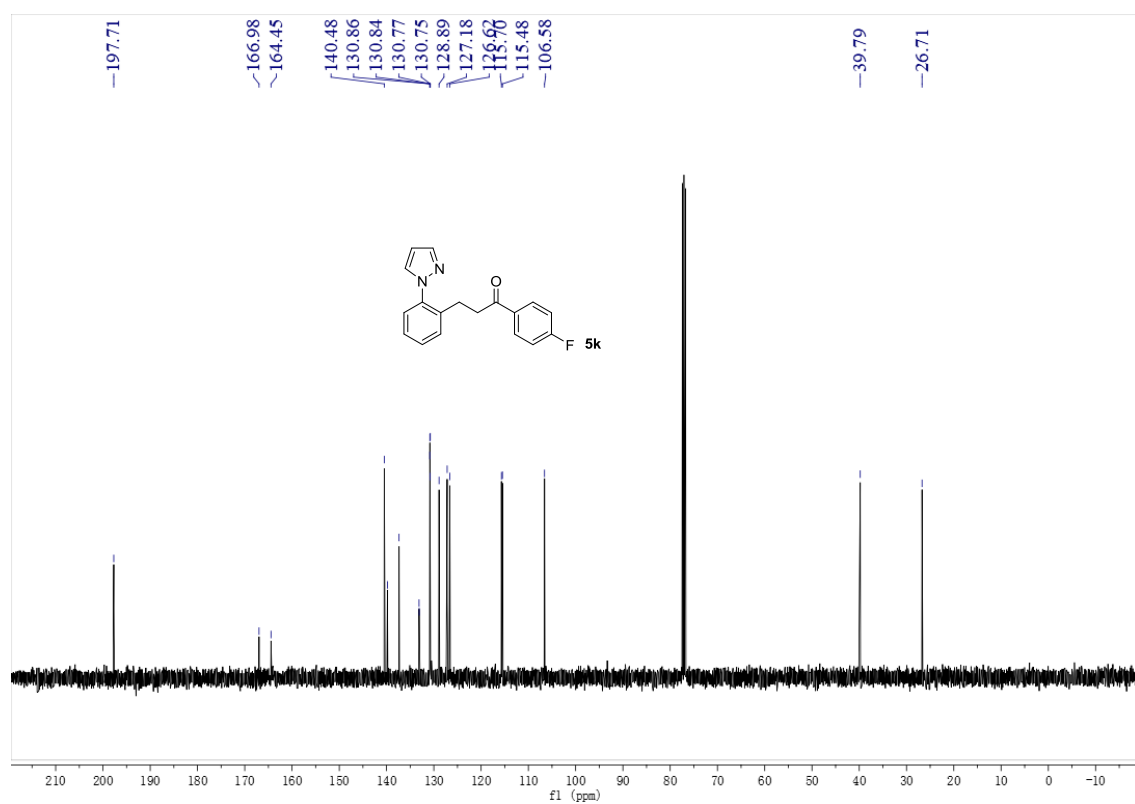

Supplementary Fig. 223 | <sup>13</sup>C NMR (101 MHz) of compound 5k (using CDCl<sub>3</sub> as solvent)

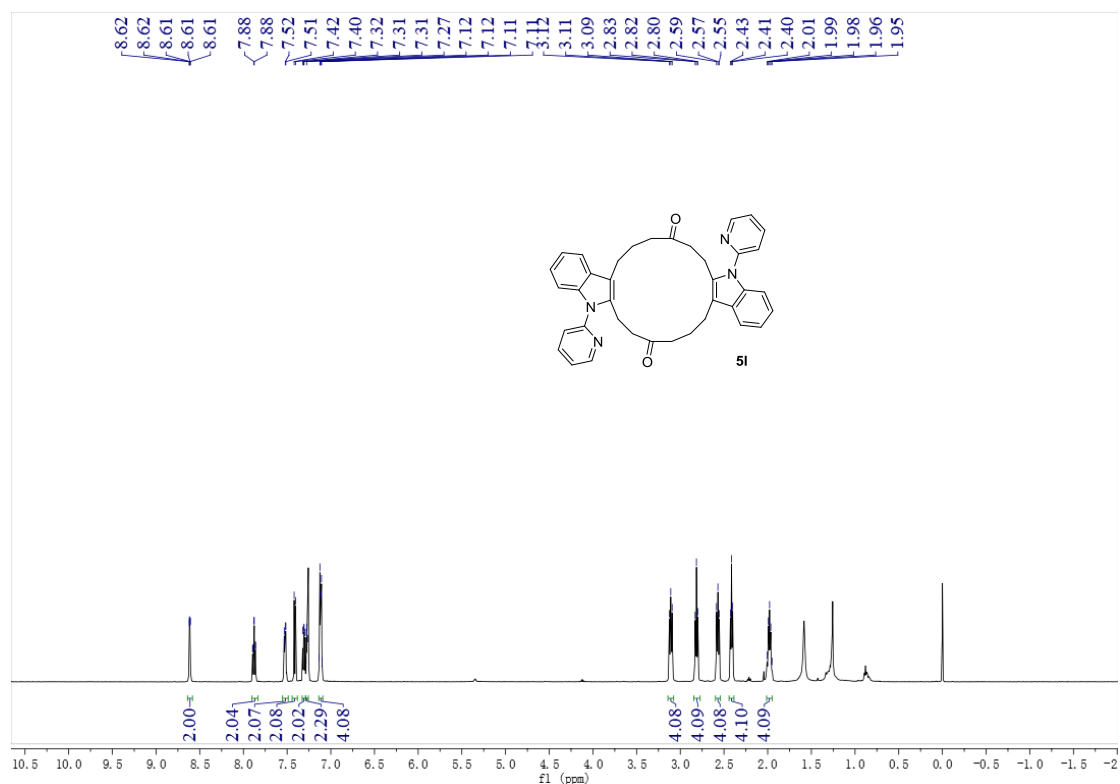

Supplementary Fig. 224 | <sup>1</sup>H NMR (500 MHz) of compound 5I (using CDCl<sub>3</sub> as solvent)

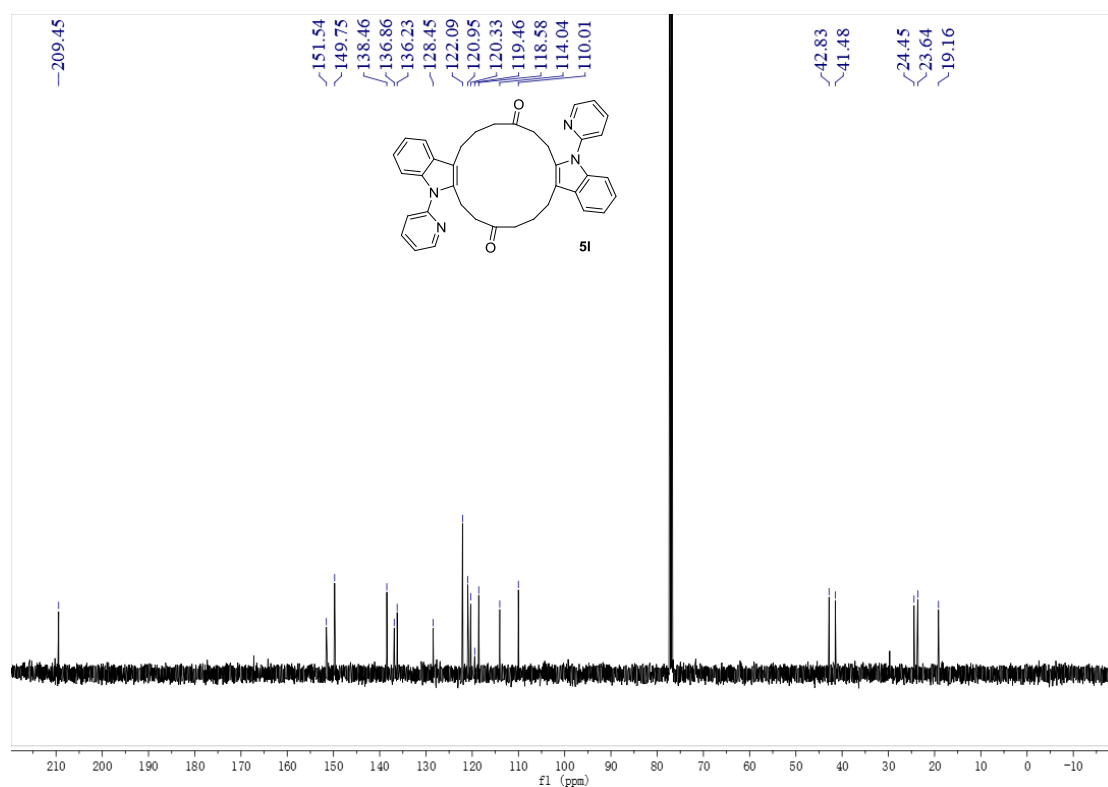

Supplementary Fig. 225 | <sup>13</sup>C NMR (126 MHz) of compound 5I (using CDCl<sub>3</sub> as solvent)

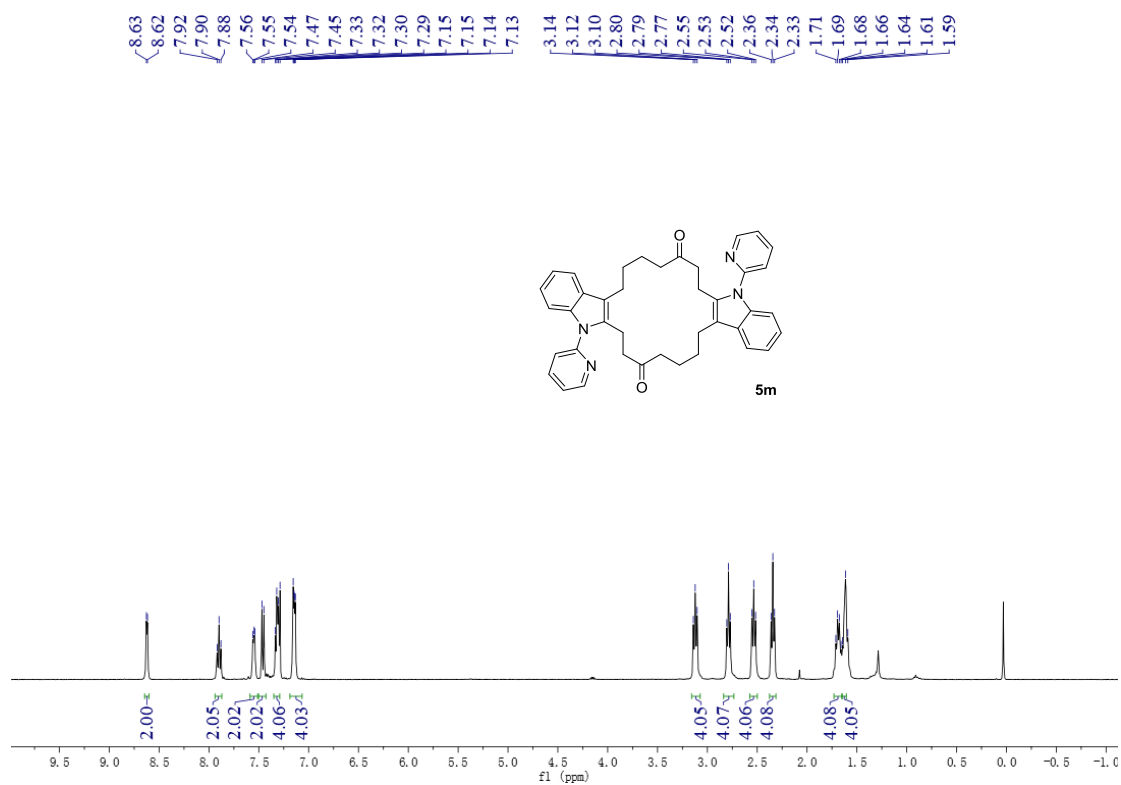

Supplementary Fig. 226 | <sup>1</sup>H NMR (400 MHz) of compound 5m (using CDCl<sub>3</sub> as solvent)

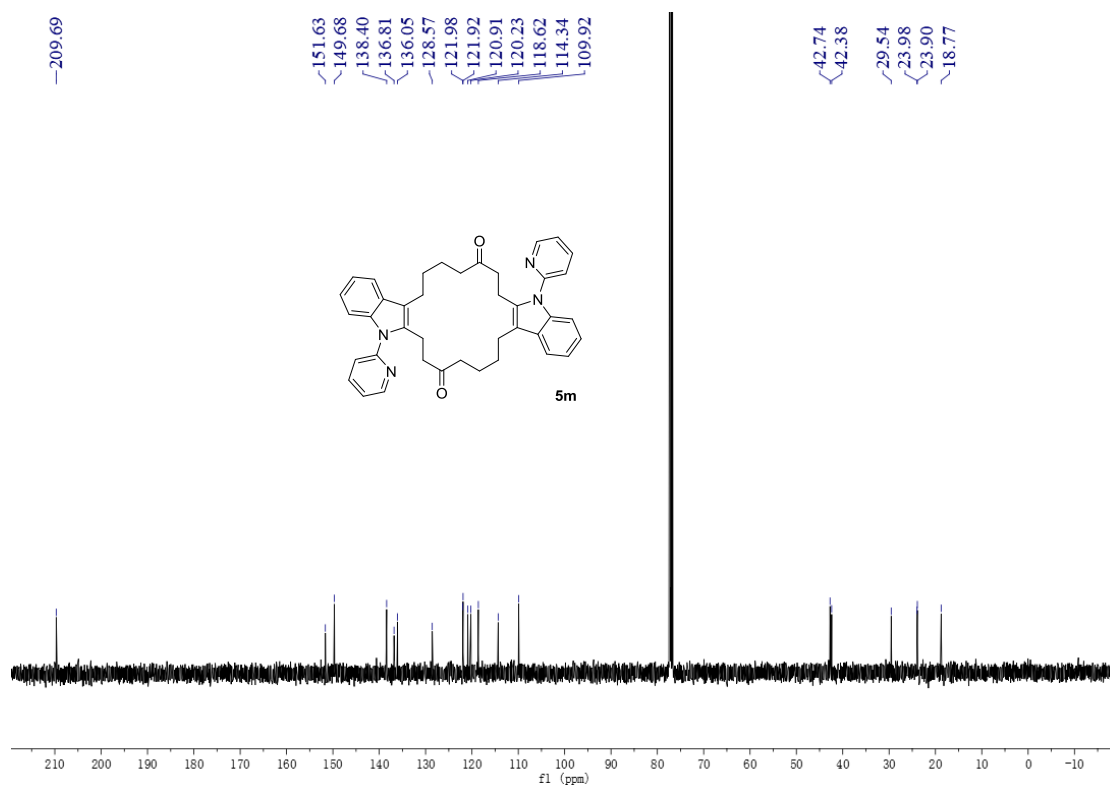

Supplementary Fig. 227 | <sup>13</sup>C NMR (101 MHz) of compound 5m (using CDCl<sub>3</sub> as solvent)

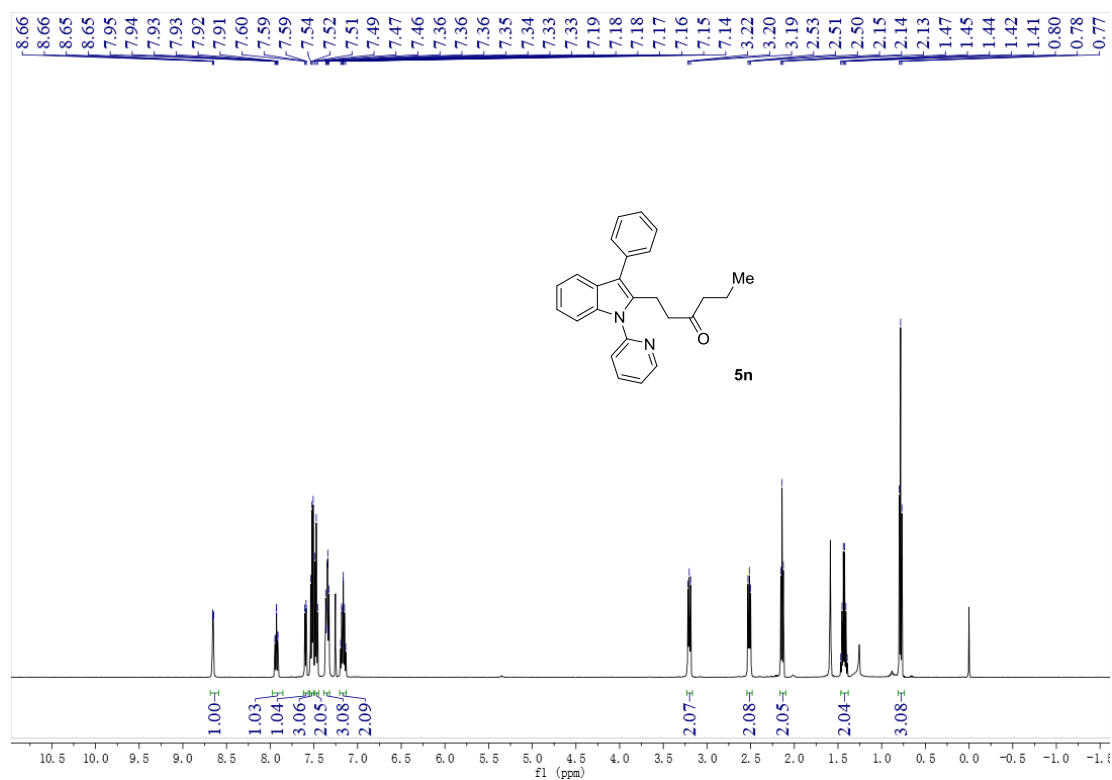

Supplementary Fig. 228 | <sup>1</sup>H NMR (500 MHz) of compound 5n (using CDCl<sub>3</sub> as solvent)

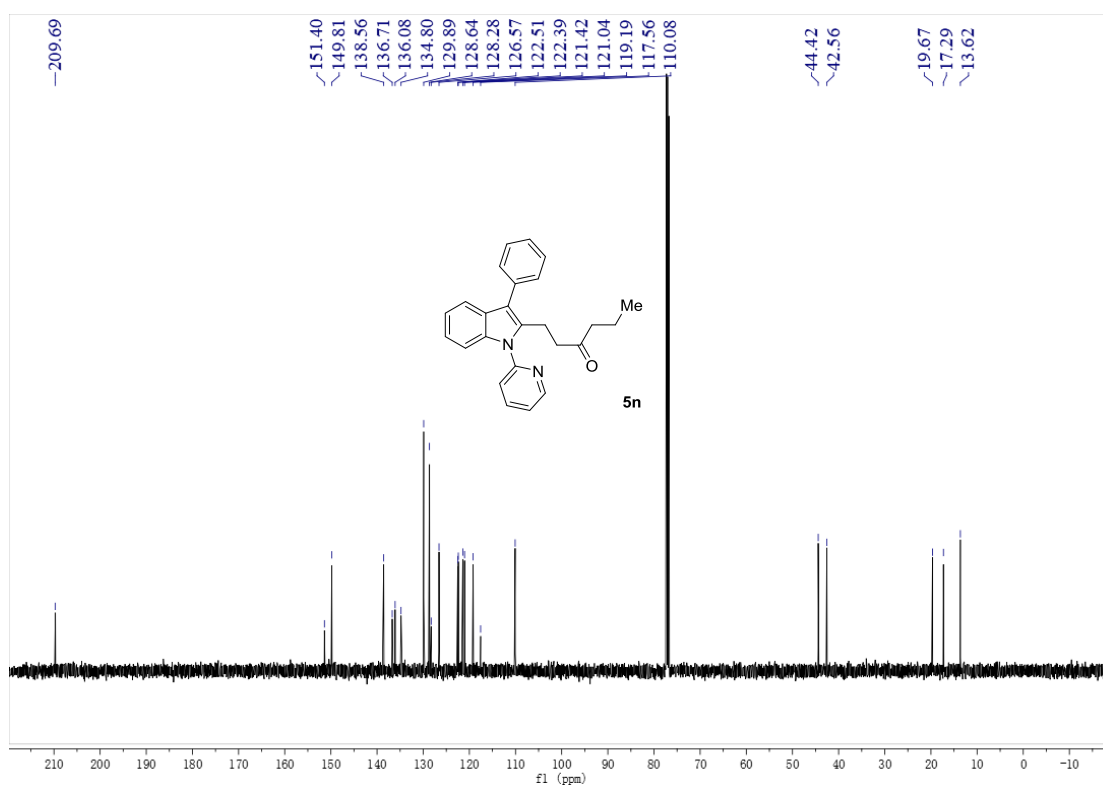

Supplementary Fig. 229 | <sup>13</sup>C NMR (126 MHz) of compound 5n (using CDCl<sub>3</sub> as solvent)

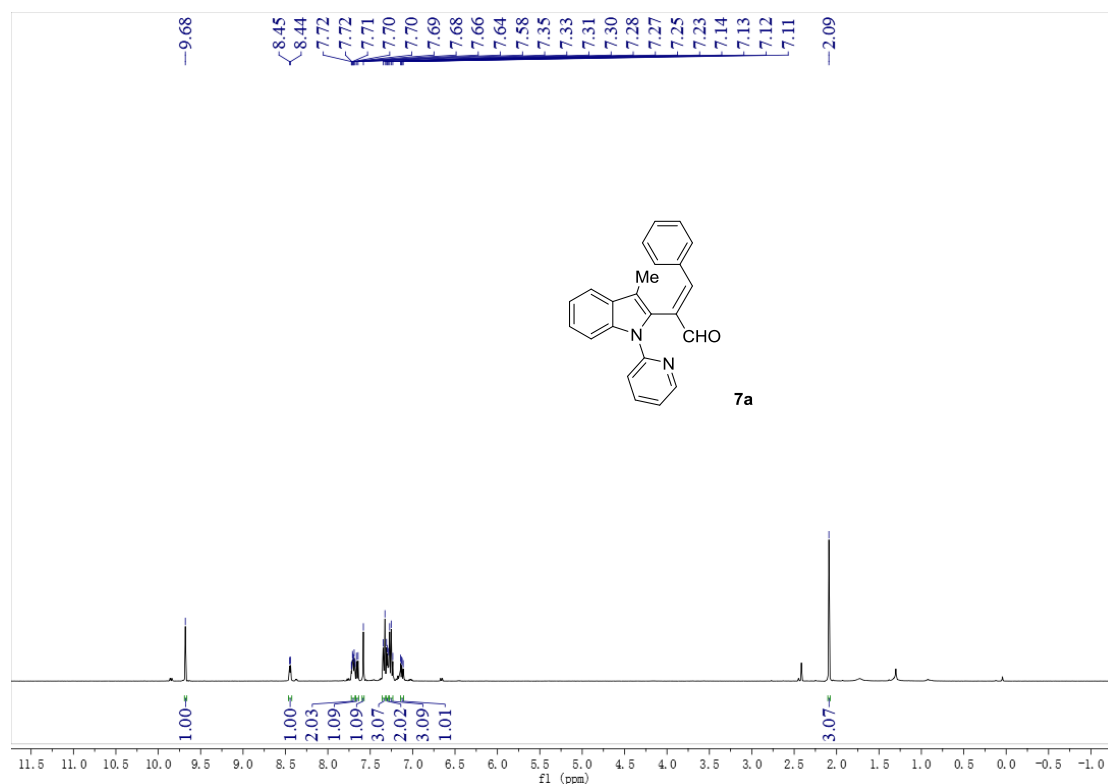

Supplementary Fig. 230 | <sup>1</sup>H NMR (400 MHz) of compound **7a** (using CDCl<sub>3</sub> as solvent)

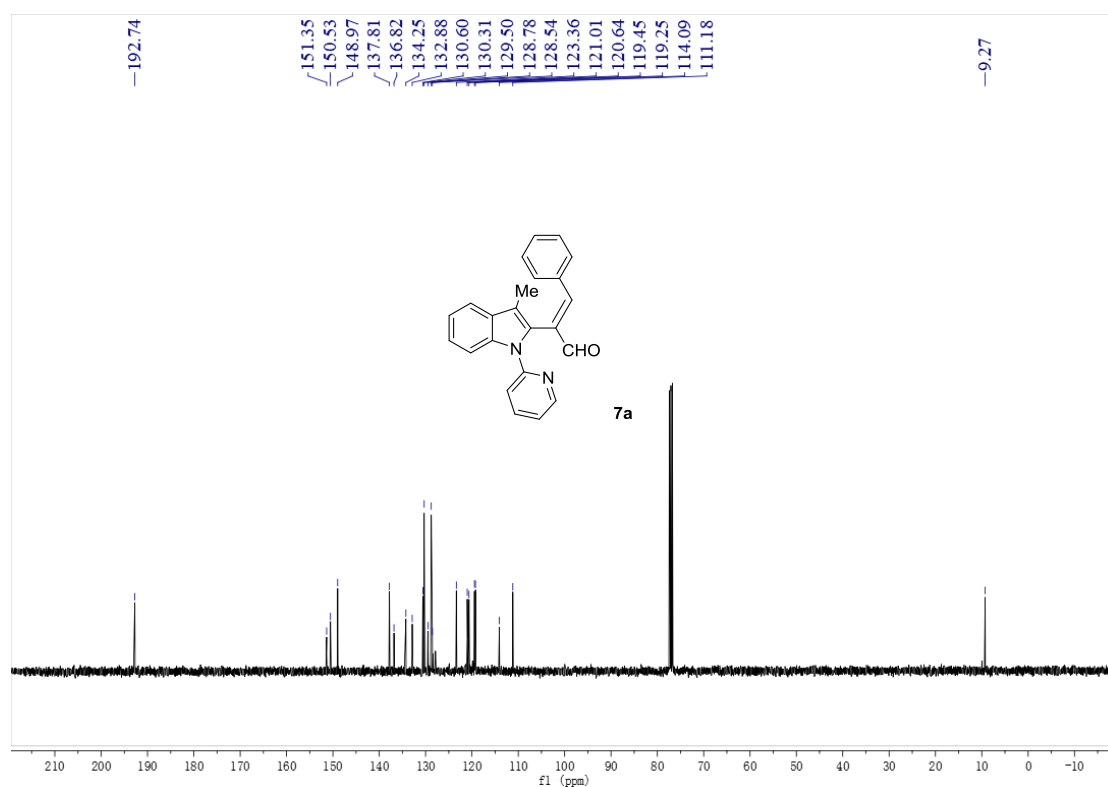

Supplementary Fig. 231 | <sup>13</sup>C NMR (101 MHz) of compound **7a** (using CDCl<sub>3</sub> as solvent)

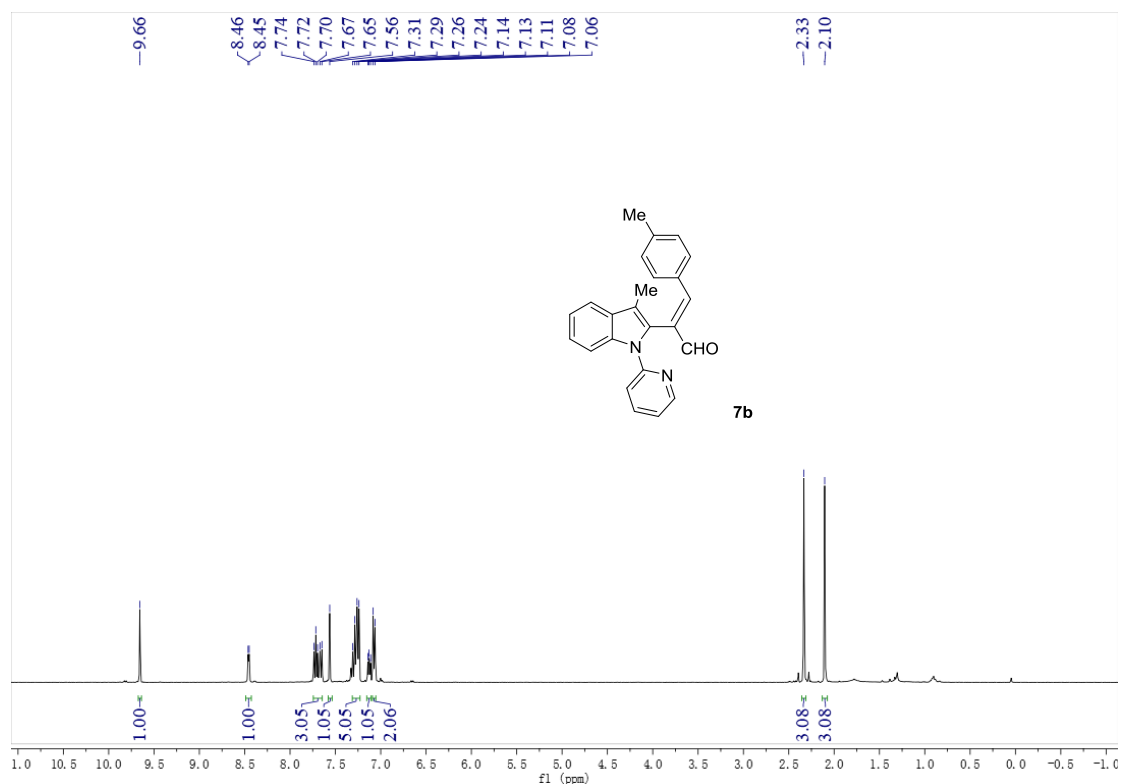

Supplementary Fig. 232 | <sup>1</sup>H NMR (400 MHz) of compound 7b (using CDCl<sub>3</sub> as solvent)

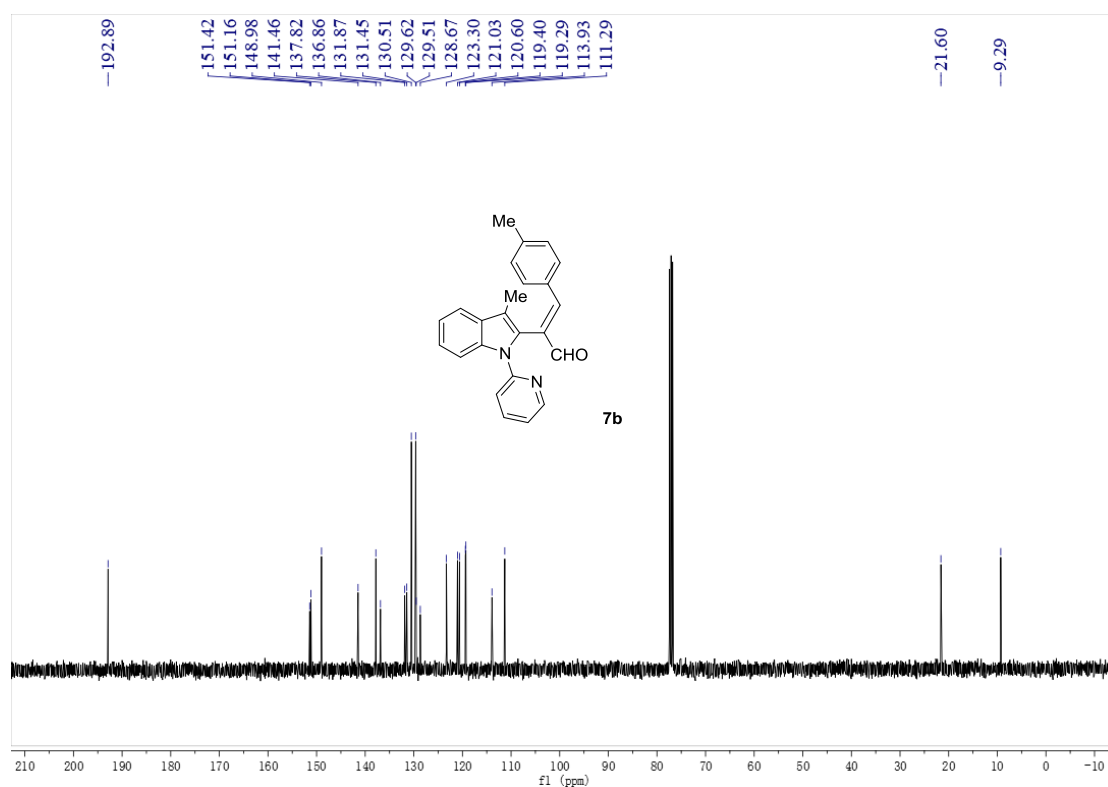

Supplementary Fig. 233 | <sup>13</sup>C NMR (101 MHz) of compound 7b (using CDCl<sub>3</sub> as solvent)

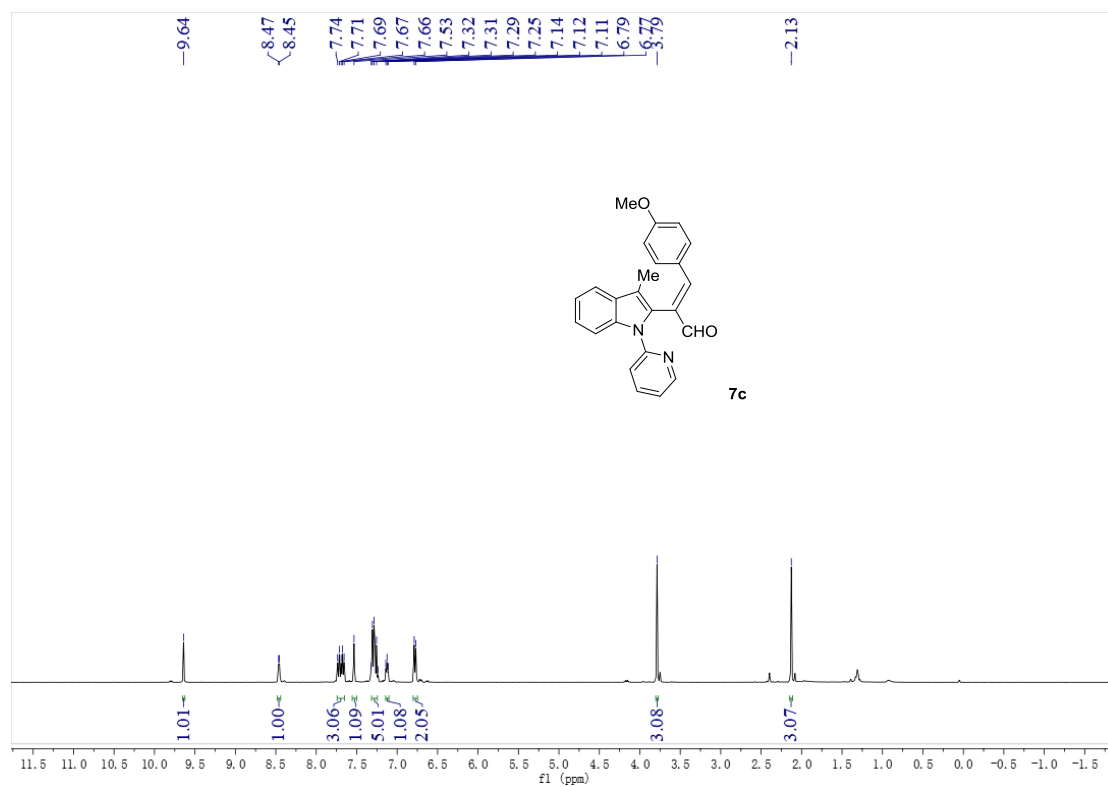

Supplementary Fig. 234 | <sup>1</sup>H NMR (400 MHz) of compound **7c** (using CDCl<sub>3</sub> as solvent)

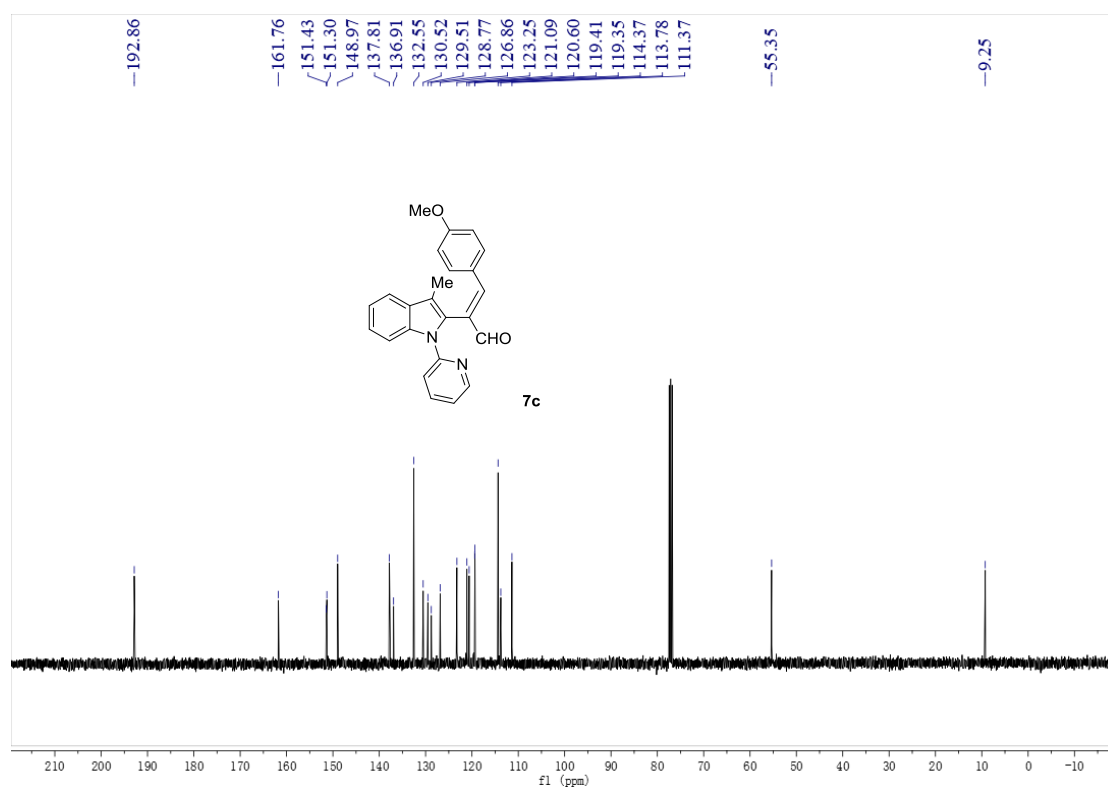

Supplementary Fig. 235 | <sup>13</sup>C NMR (101 MHz) of compound **7c** (using CDCl<sub>3</sub> as solvent)



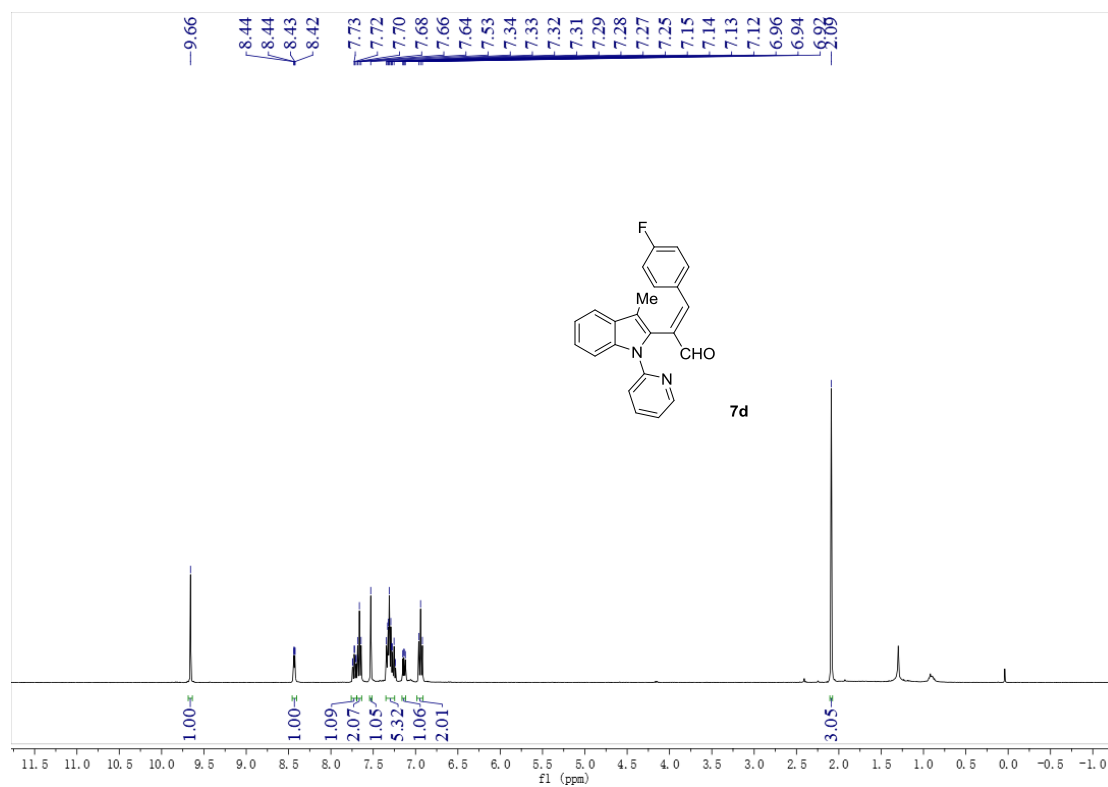

Supplementary Fig. 236 | <sup>1</sup>H NMR (400 MHz) of compound 7d (using CDCl<sub>3</sub> as solvent)

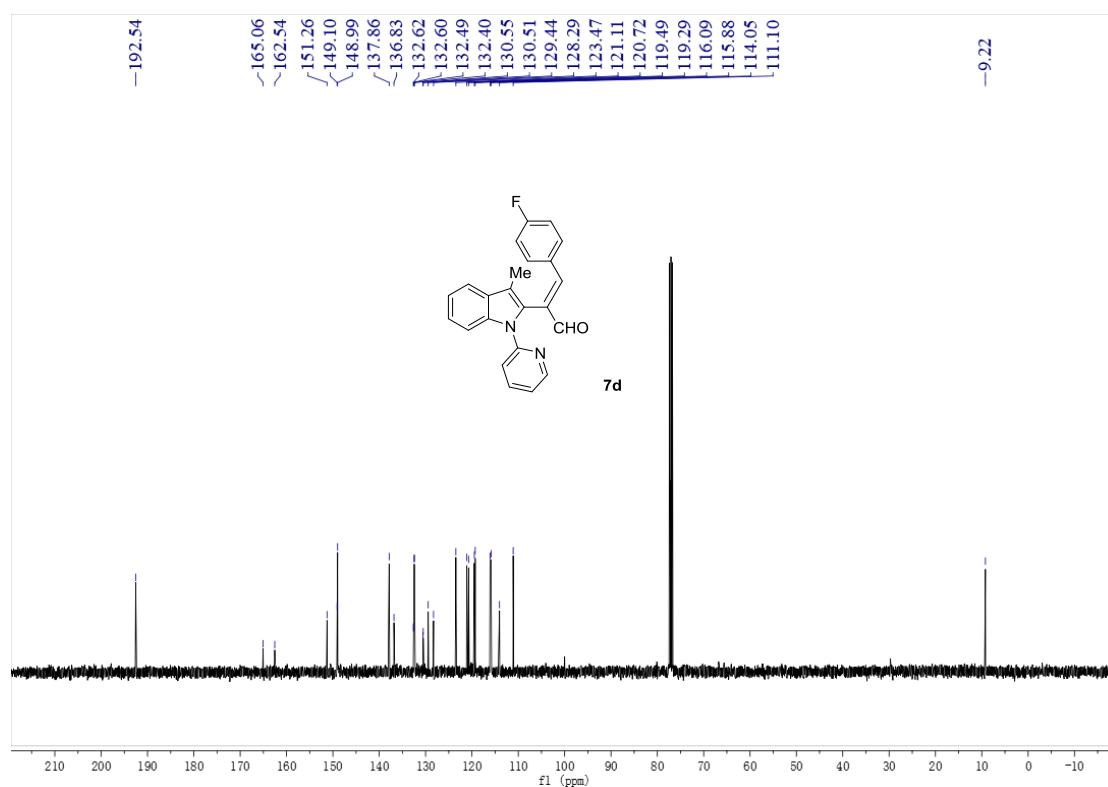

Supplementary Fig. 237 | <sup>13</sup>C NMR (101 MHz) of compound 7d (using CDCl<sub>3</sub> as solvent)

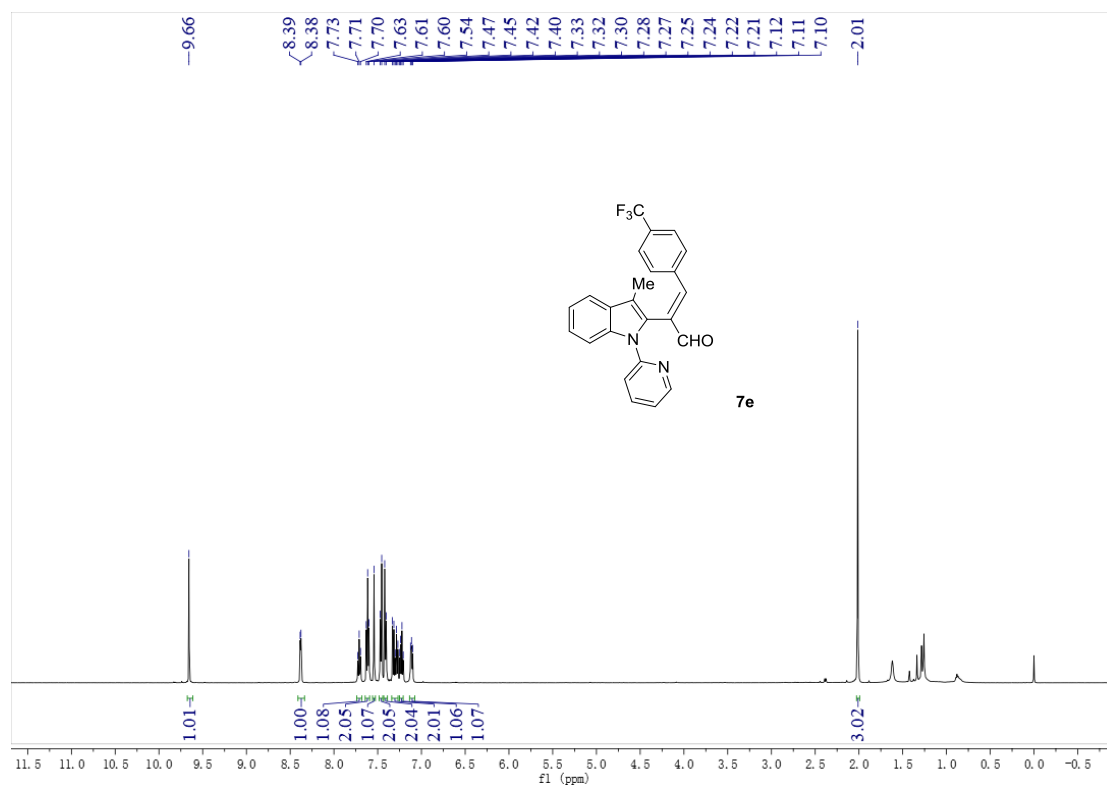

Supplementary Fig. 238 | <sup>1</sup>H NMR (500 MHz) of compound **7e** (using CDCl<sub>3</sub> as solvent)

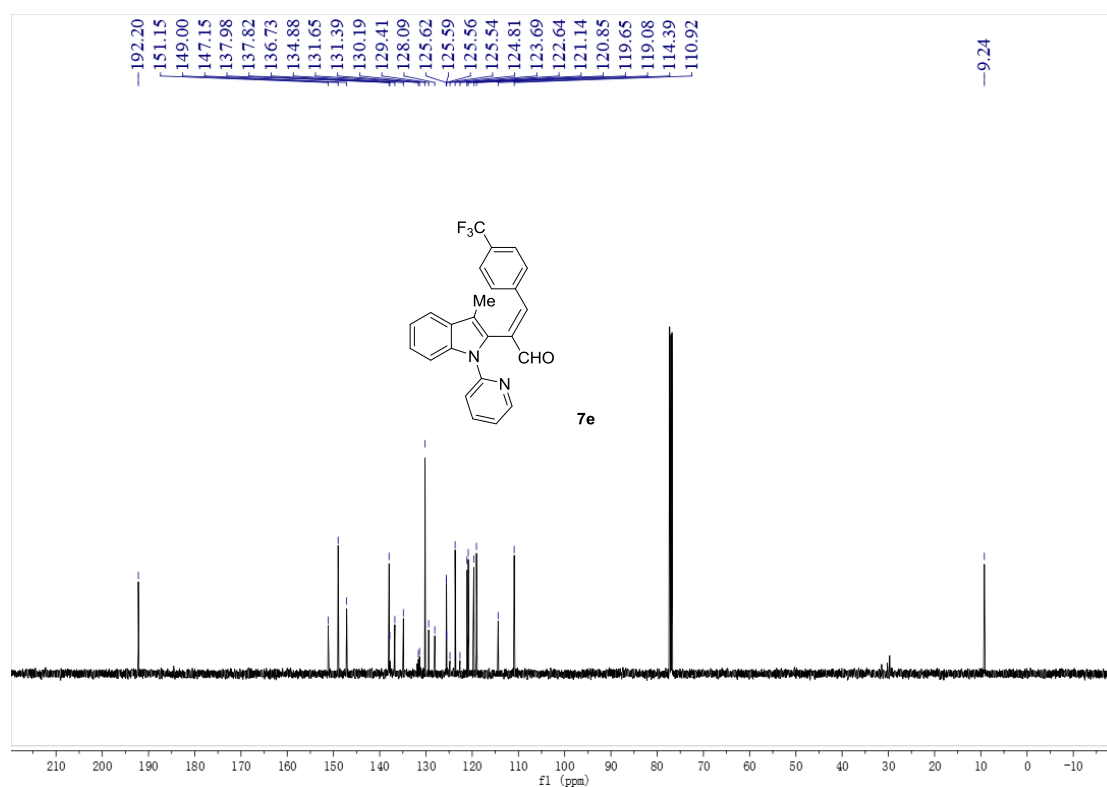

Supplementary Fig. 239 | <sup>13</sup>C NMR (126 MHz) of compound **7e** (using CDCl<sub>3</sub> as solvent)

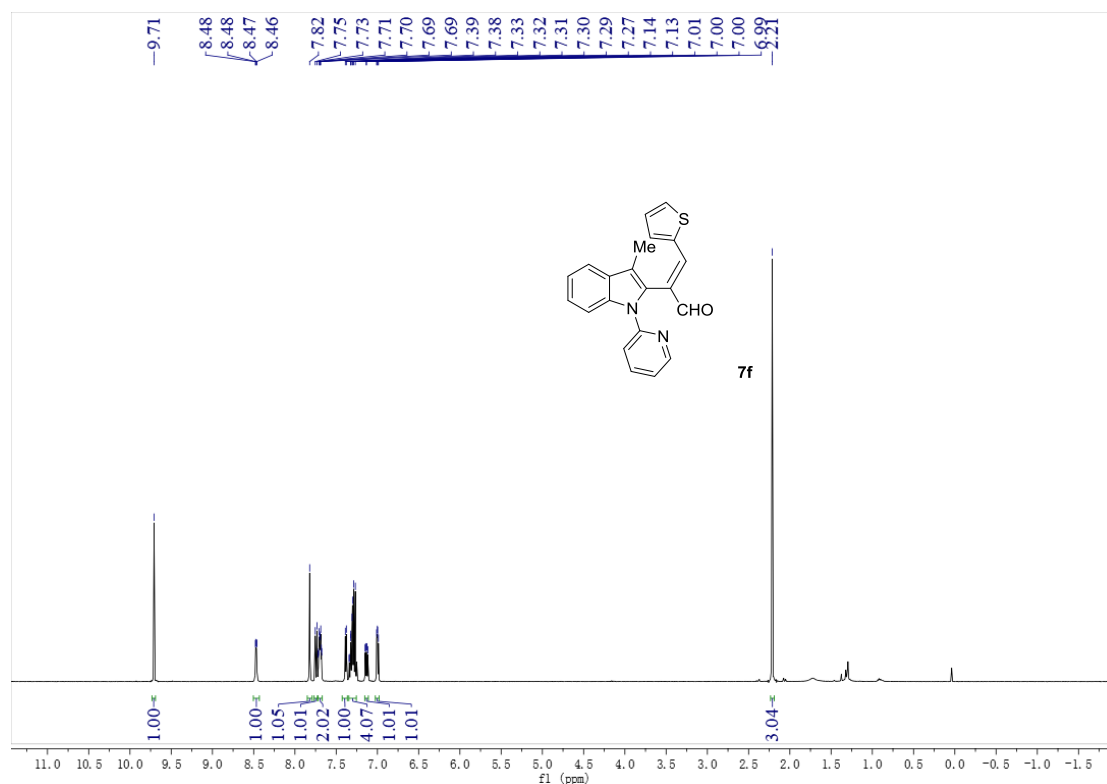

Supplementary Fig. 240 | <sup>1</sup>H NMR (400 MHz) of compound 7f (using CDCl<sub>3</sub> as solvent)

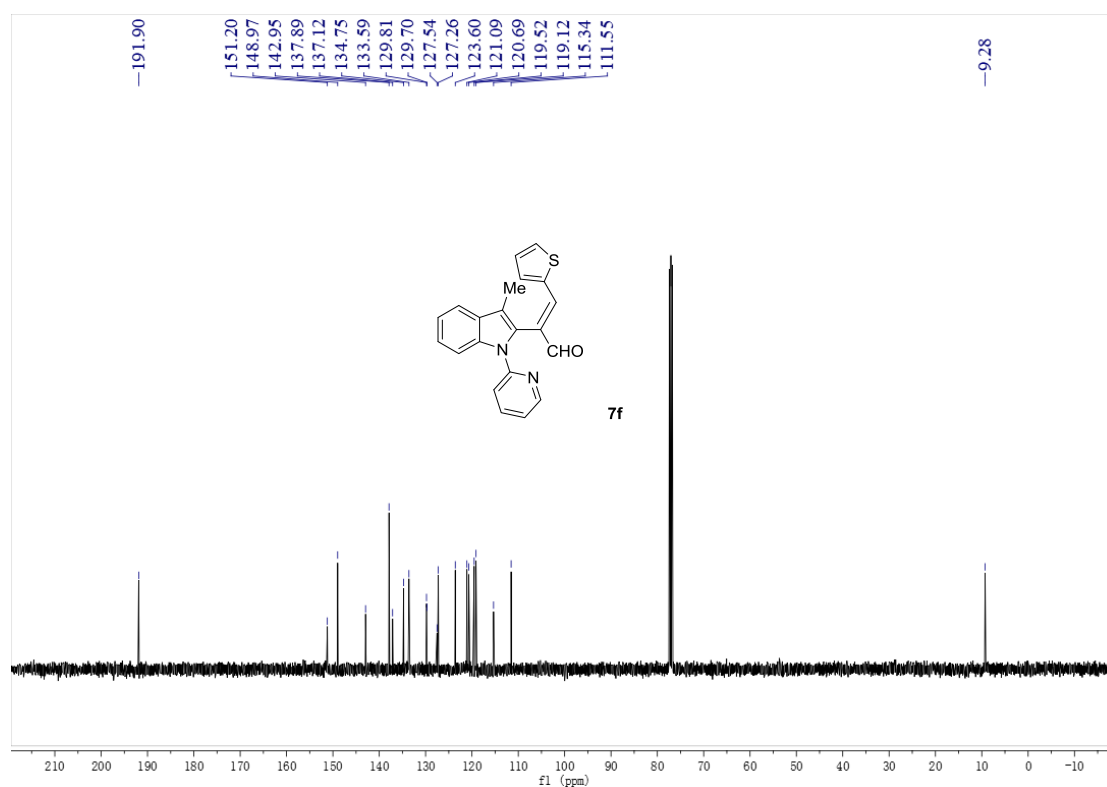

Supplementary Fig. 241 | <sup>13</sup>C NMR (101 MHz) of compound 7f (using CDCl<sub>3</sub> as solvent)

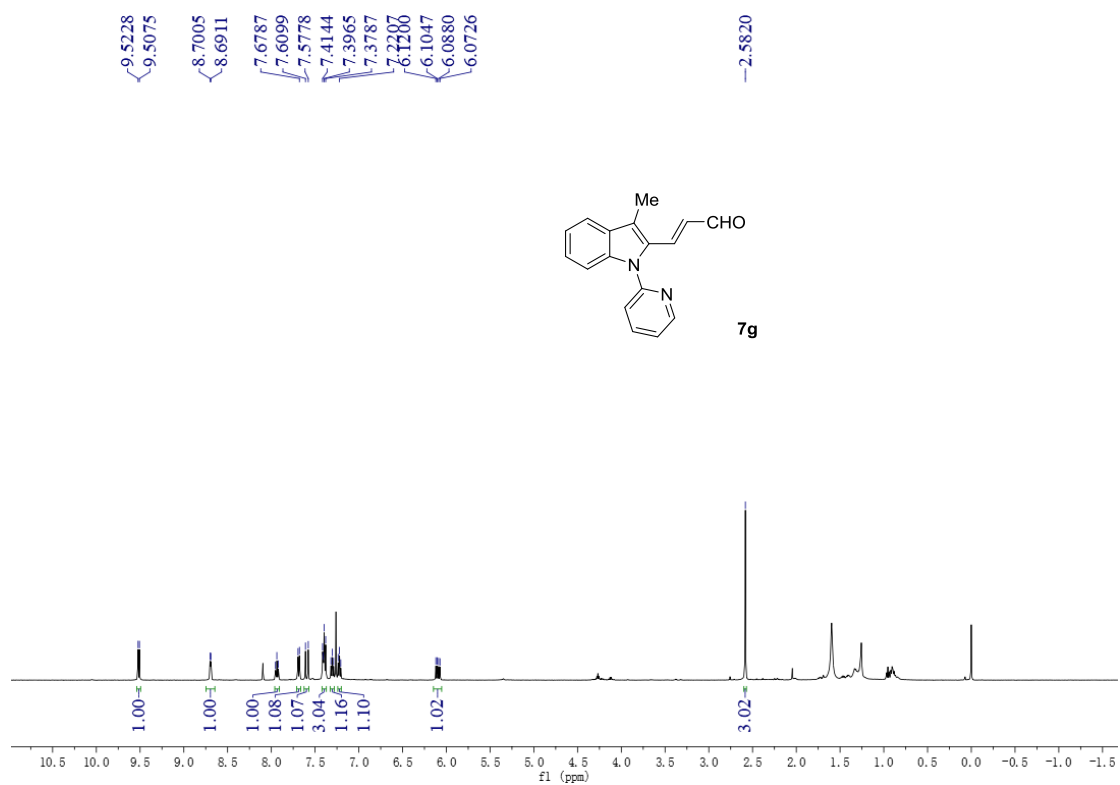

Supplementary Fig. 242 | <sup>1</sup>H NMR (500 MHz) of compound **7g** (using CDCl<sub>3</sub> as solvent)

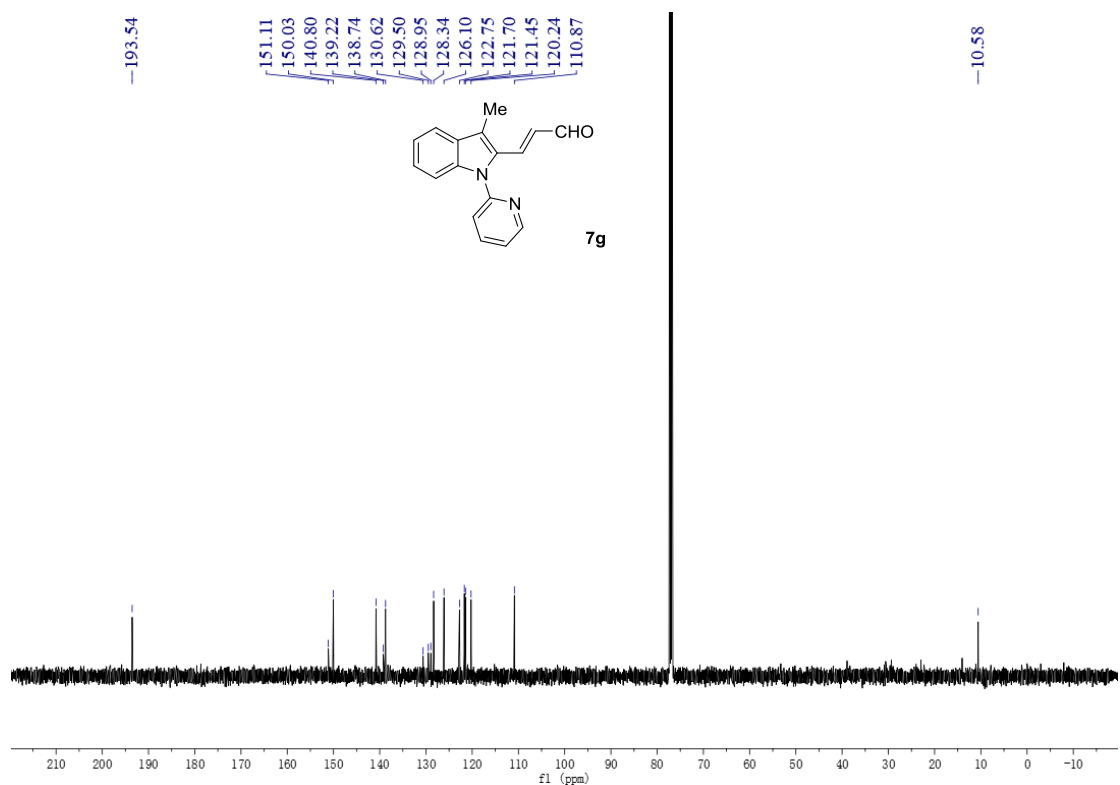

Supplementary Fig. 243 | <sup>13</sup>C NMR (126 MHz) of compound **7g** (using CDCl<sub>3</sub> as solvent)

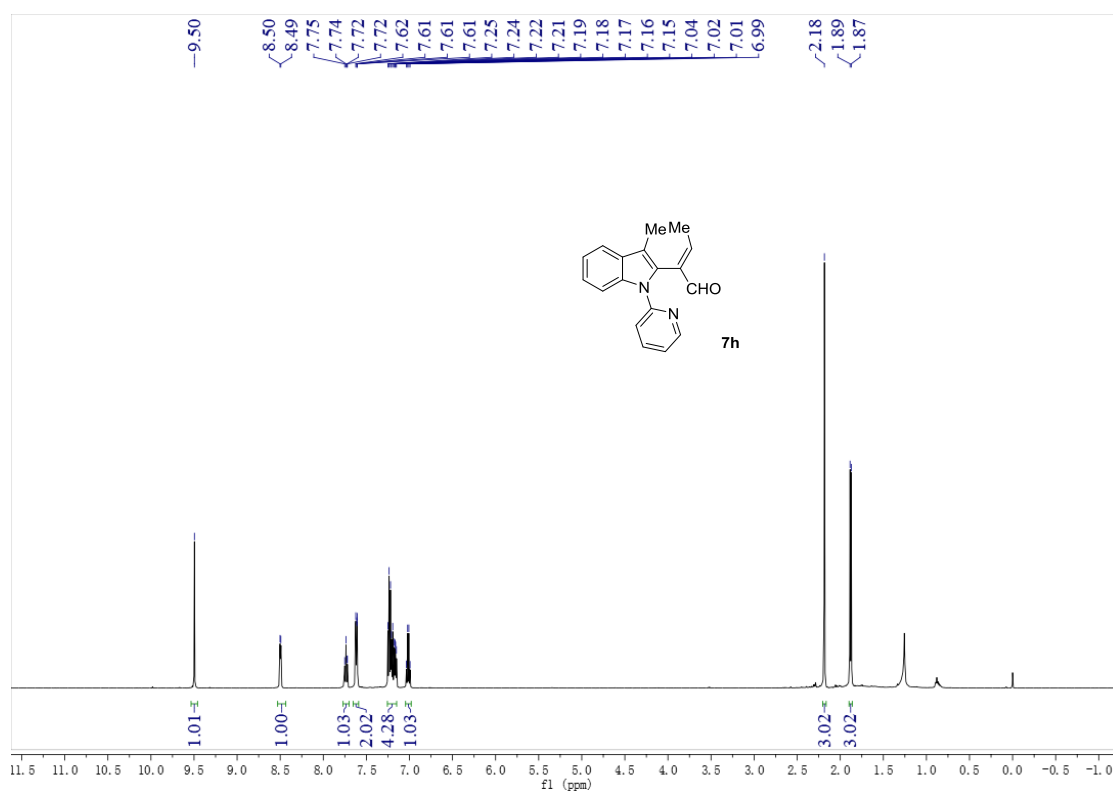

Supplementary Fig. 244 | <sup>1</sup>H NMR (500 MHz) of compound 7h (using CDCl<sub>3</sub> as solvent)

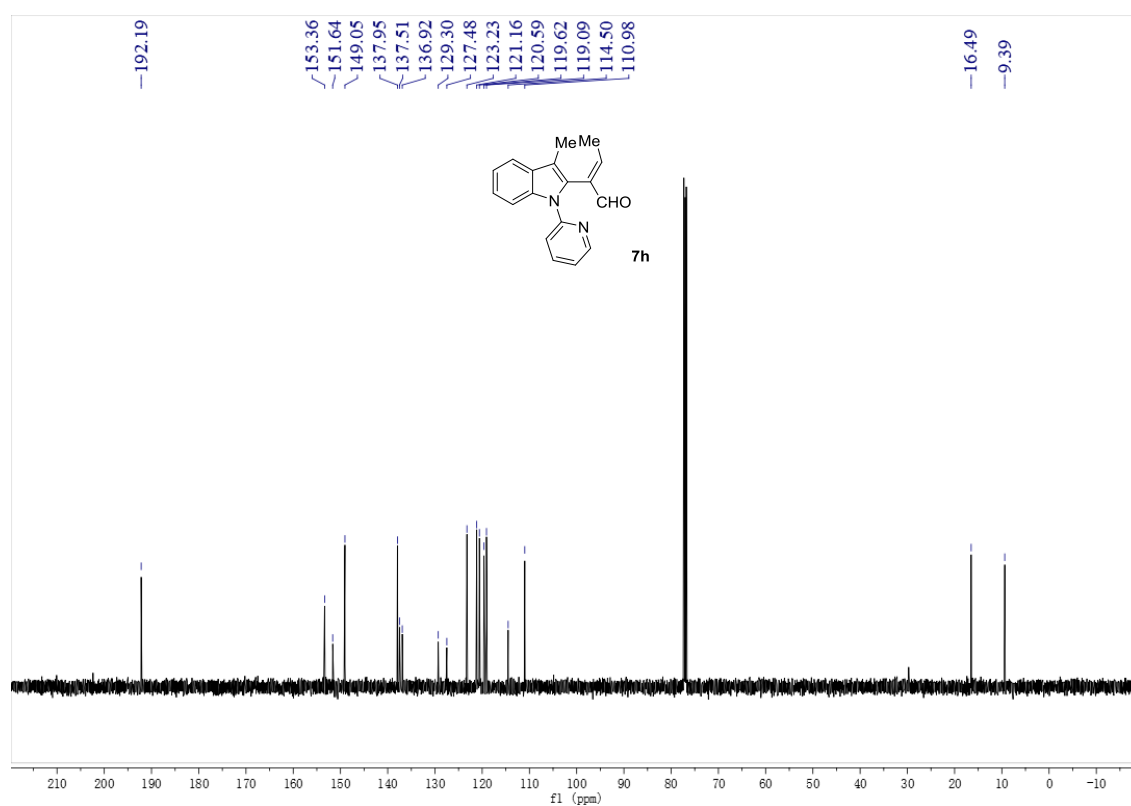

Supplementary Fig. 245 | <sup>13</sup>C NMR (126 MHz) of compound 7h (using CDCl<sub>3</sub> as solvent)

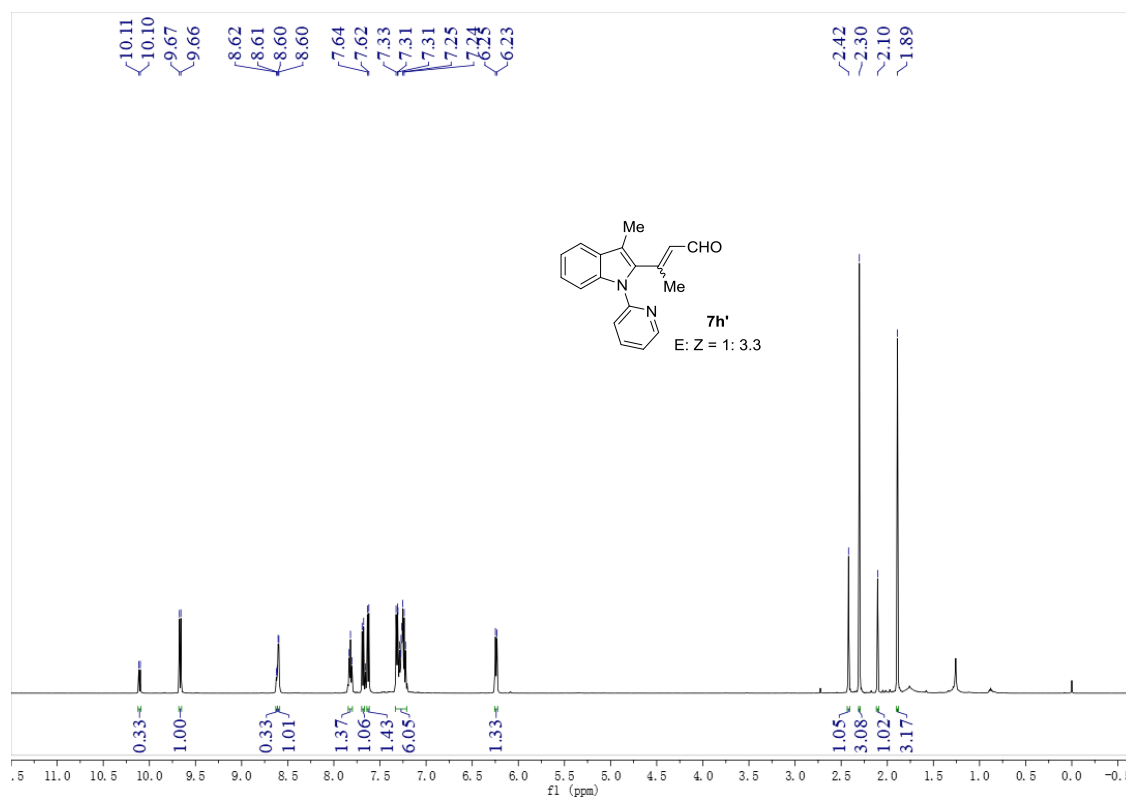

Supplementary Fig. 246 | <sup>1</sup>H NMR (500 MHz) of compound 7h' (using CDCl<sub>3</sub> as solvent)

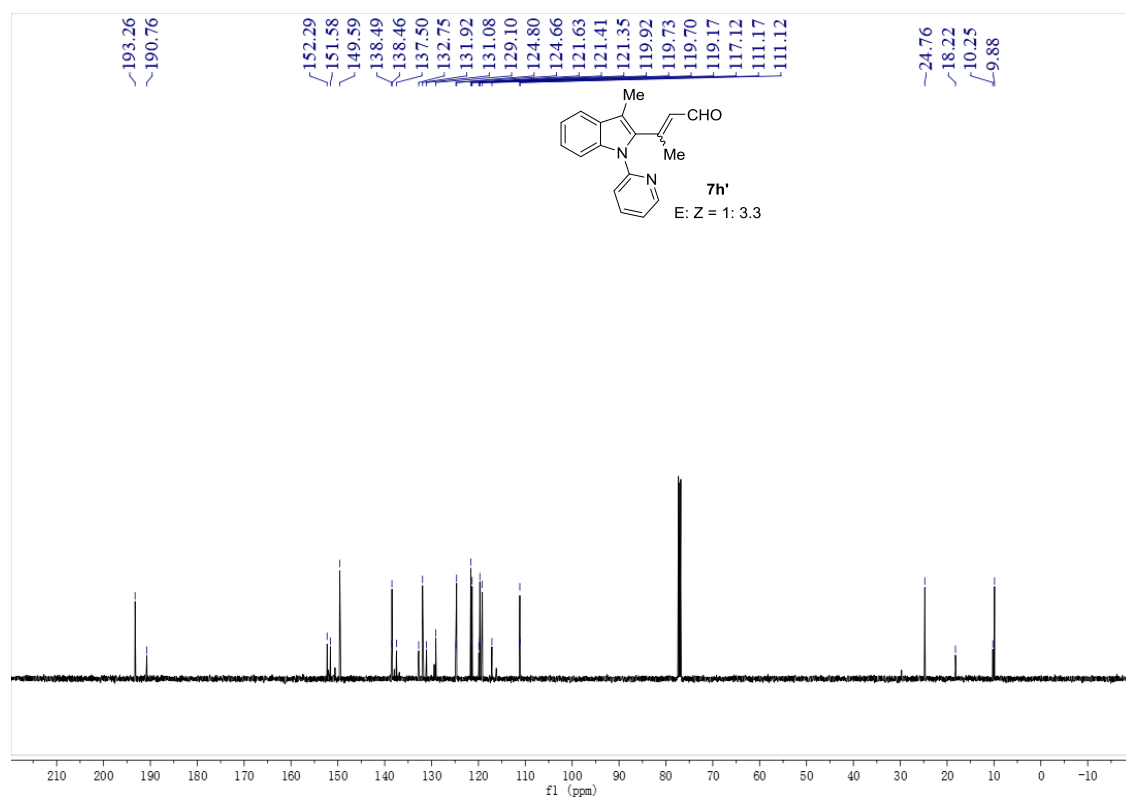

Supplementary Fig. 247 | <sup>13</sup>C NMR (126 MHz) of compound 7h' (using CDCl<sub>3</sub> as solvent)

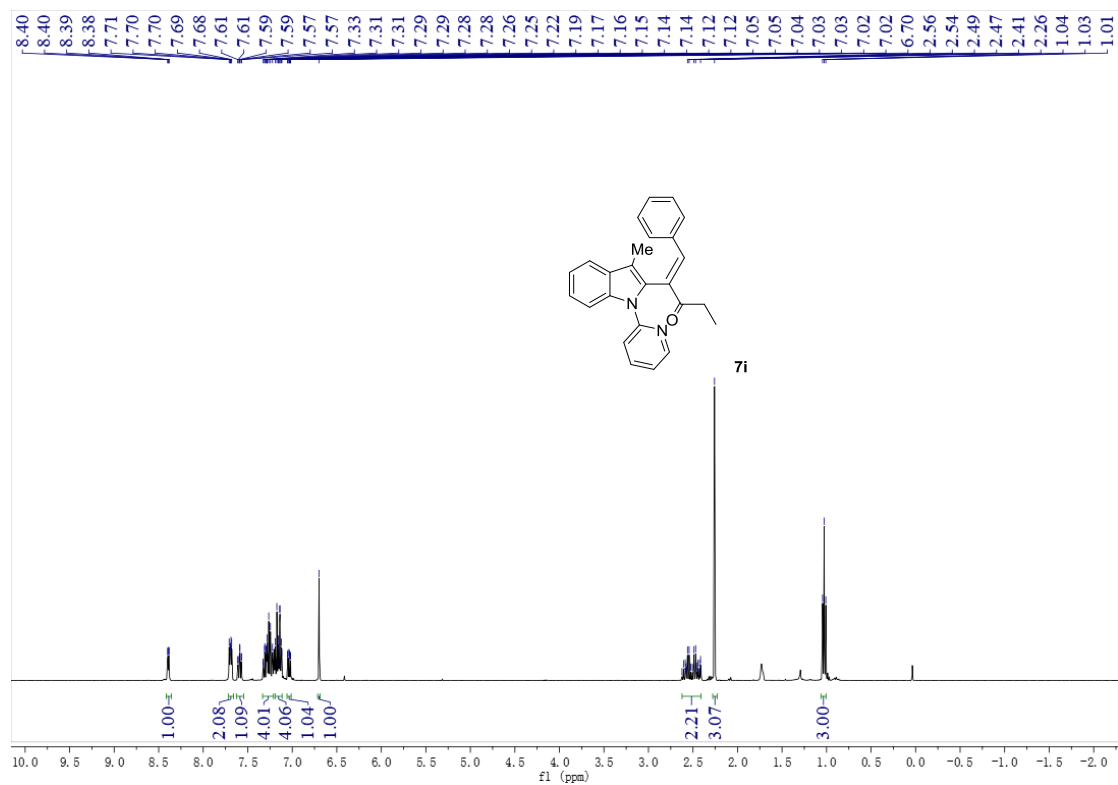

Supplementary Fig. 248 | <sup>1</sup>H NMR (400 MHz) of compound 7i (using CDCl<sub>3</sub> as solvent)

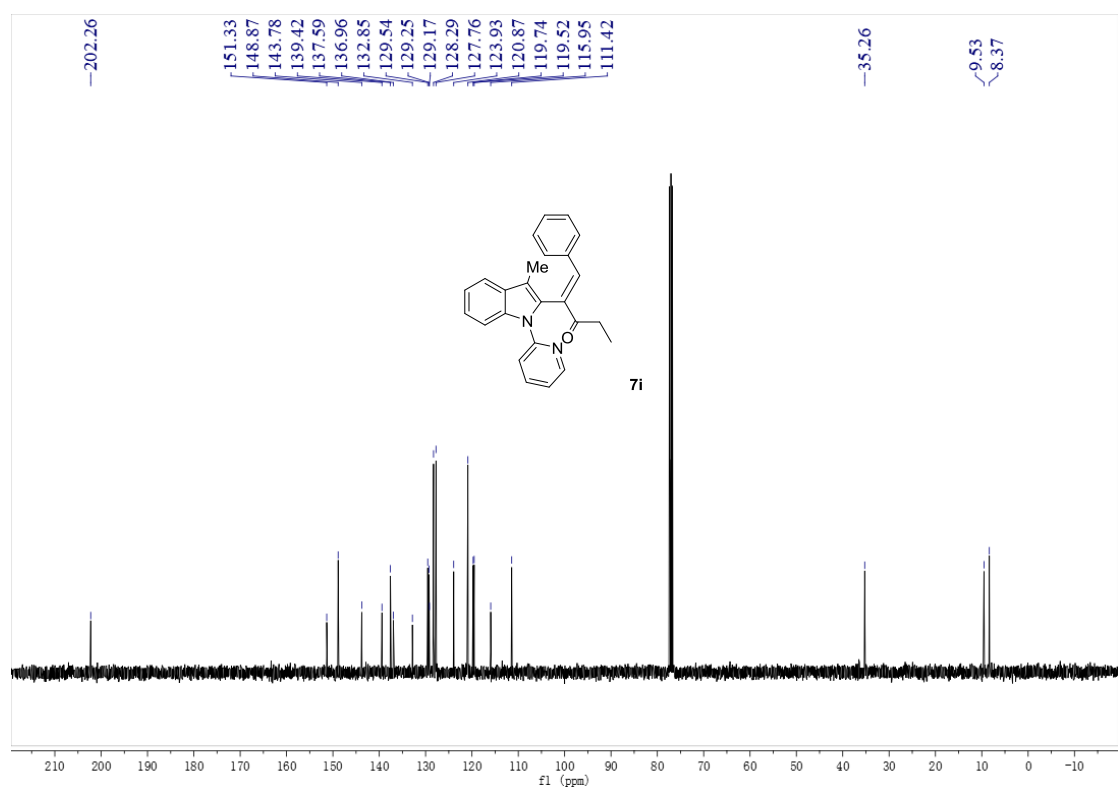

Supplementary Fig. 249 | <sup>13</sup>C NMR (101 MHz) of compound 7i (using CDCl<sub>3</sub> as solvent)

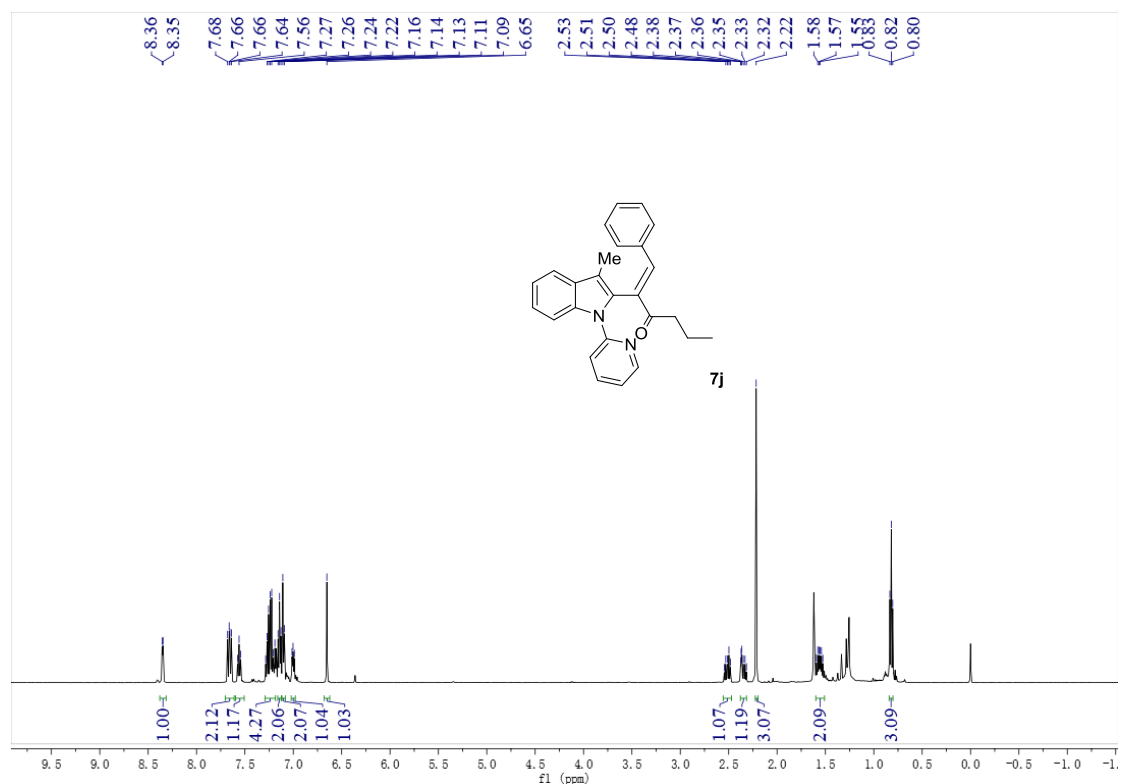

Supplementary Fig. 250 | <sup>1</sup>H NMR (500 MHz) of compound 7j (using CDCl<sub>3</sub> as solvent)

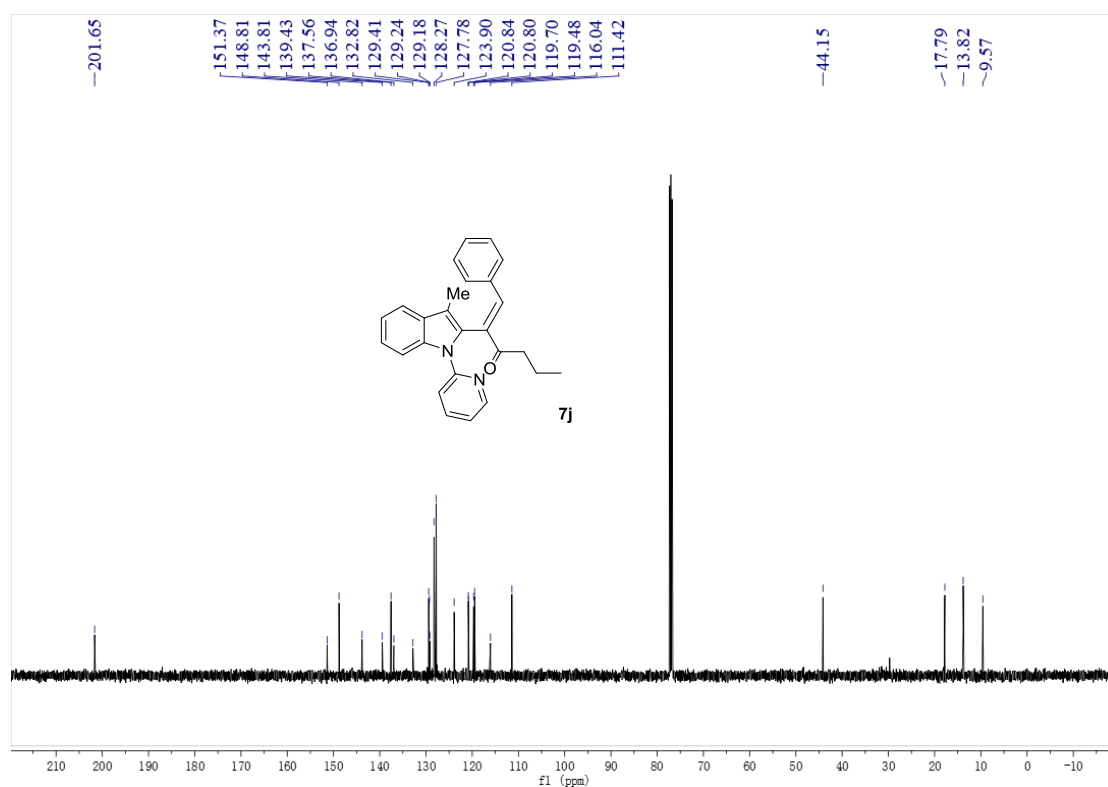

Supplementary Fig. 251 | <sup>13</sup>C NMR (126 MHz) of compound 7j (using CDCl<sub>3</sub> as solvent)



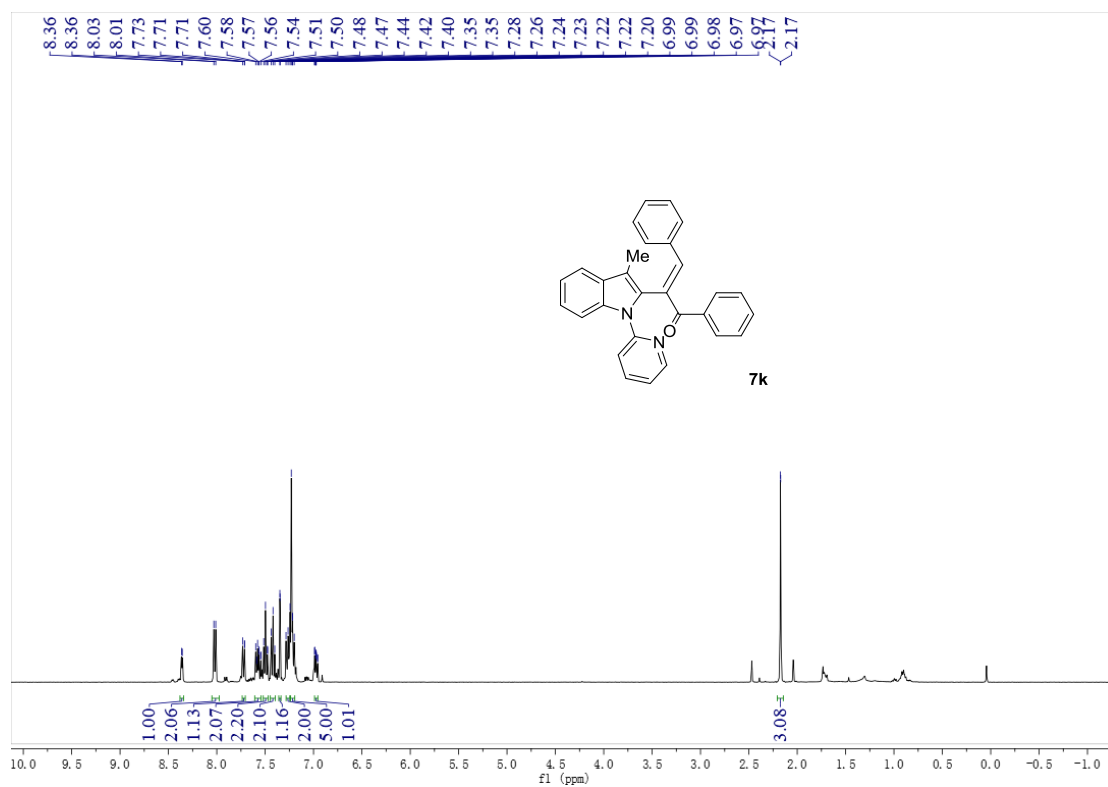

Supplementary Fig. 252 | <sup>1</sup>H NMR (400 MHz) of compound 7k (using CDCl<sub>3</sub> as solvent)

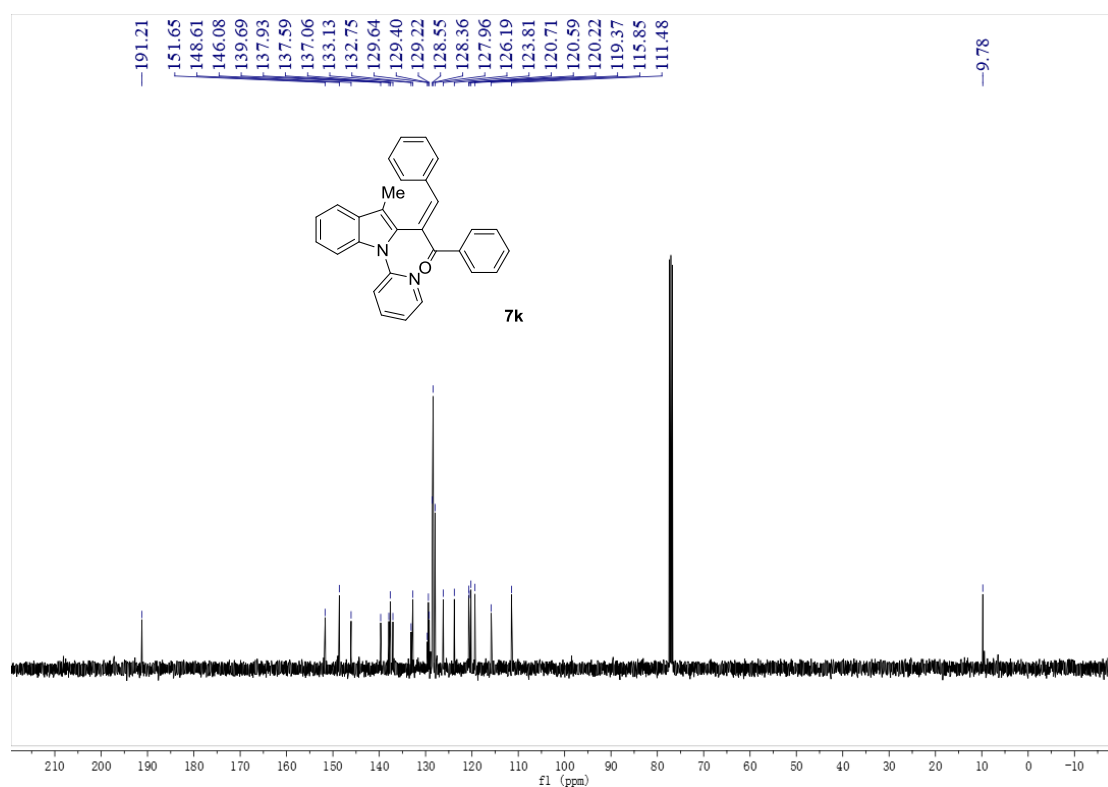

Supplementary Fig. 253 | <sup>13</sup>C NMR (101 MHz) of compound 7k (using CDCl<sub>3</sub> as solvent)

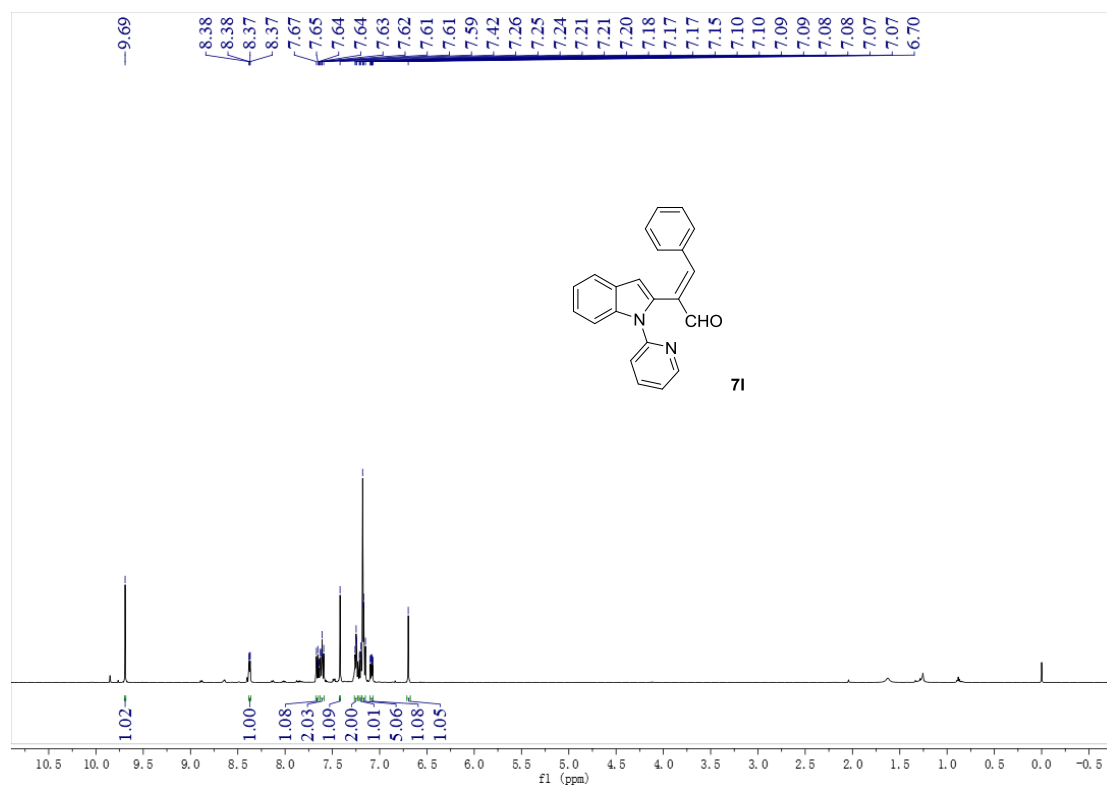

Supplementary Fig. 254 | <sup>1</sup>H NMR (500 MHz) of compound 7I (using CDCl<sub>3</sub> as solvent)

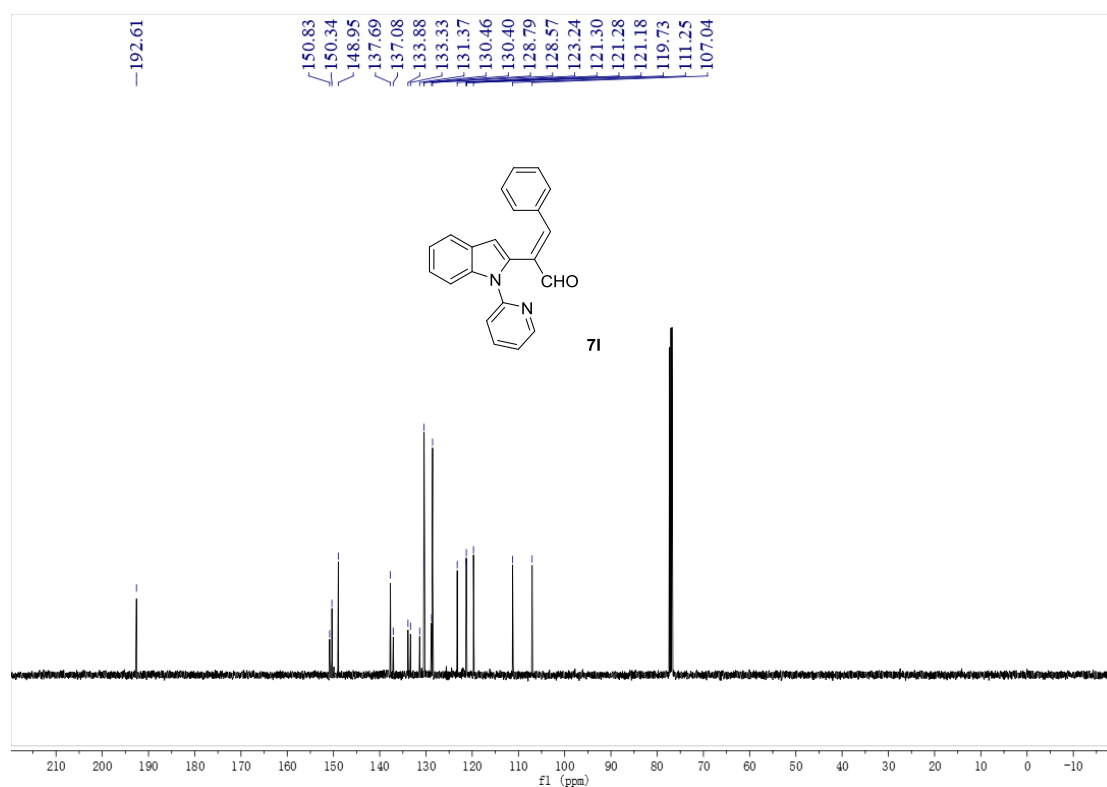

Supplementary Fig. 255 | <sup>13</sup>C NMR (126 MHz) of compound 7I (using CDCl<sub>3</sub> as solvent)

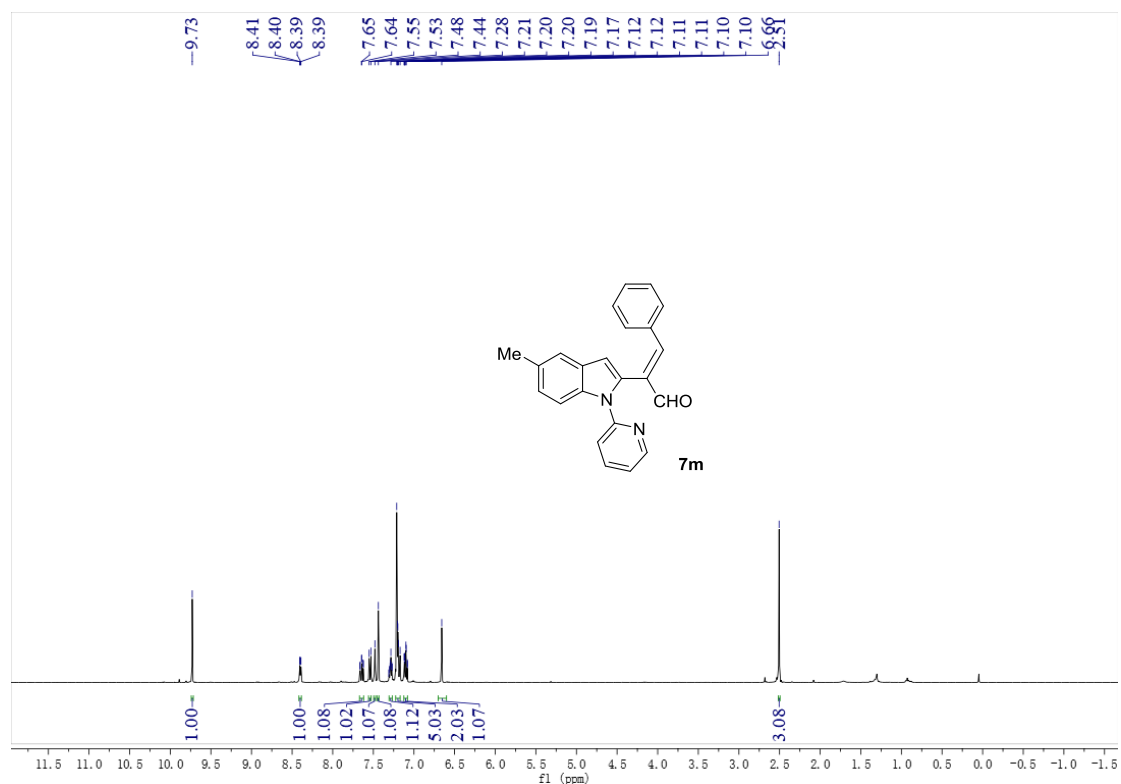

Supplementary Fig. 256 | <sup>1</sup>H NMR (400 MHz) of compound 7m (using CDCl<sub>3</sub> as solvent)

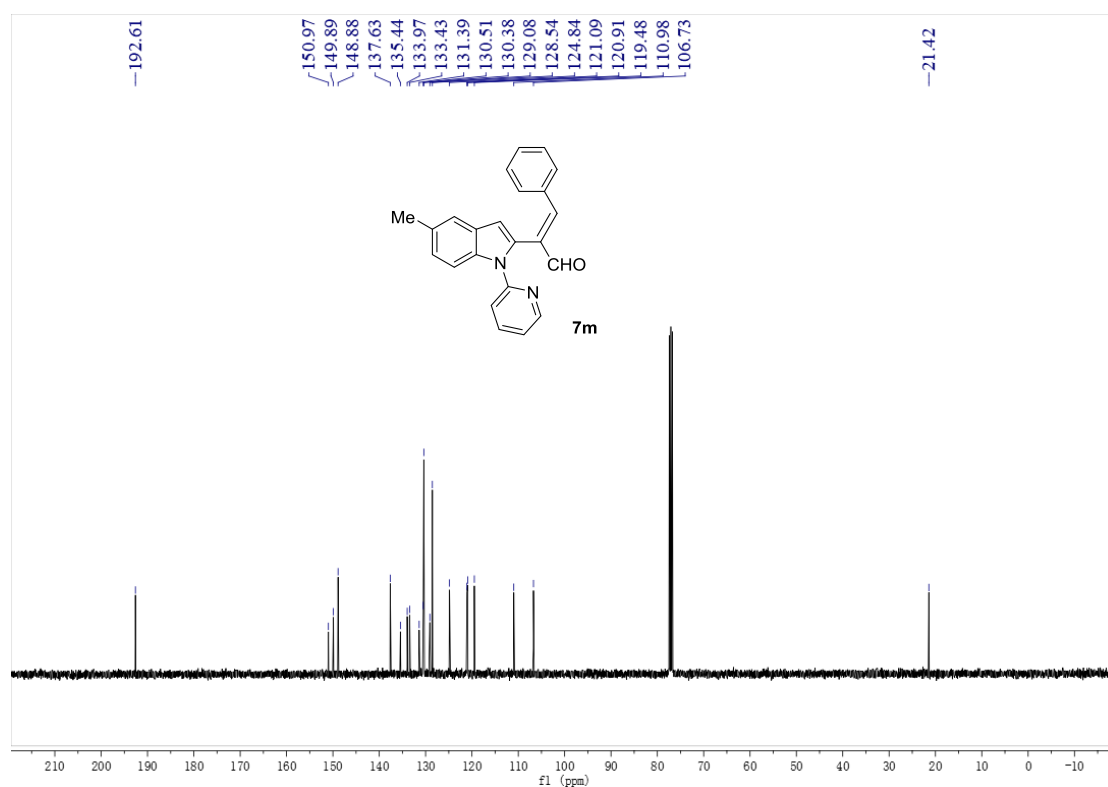

Supplementary Fig. 257 | <sup>13</sup>C NMR (101 MHz) of compound 7m (using CDCl<sub>3</sub> as solvent)

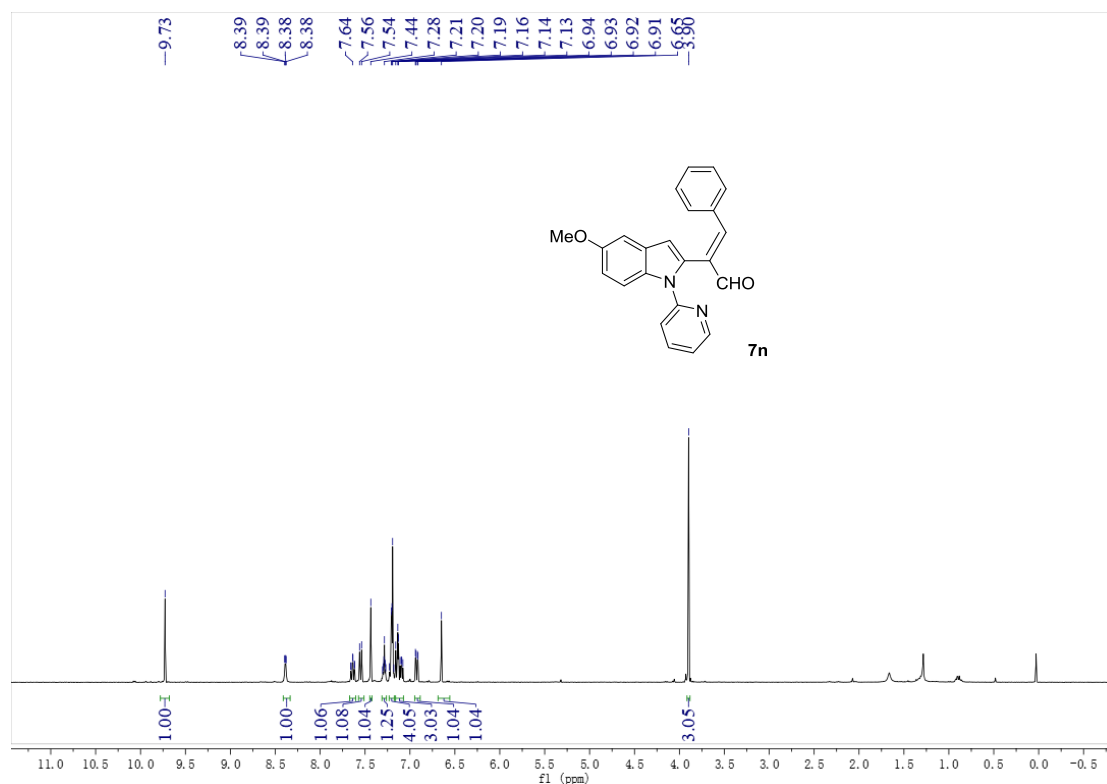

Supplementary Fig. 258 | <sup>1</sup>H NMR (400 MHz) of compound 7n (using CDCl<sub>3</sub> as solvent)

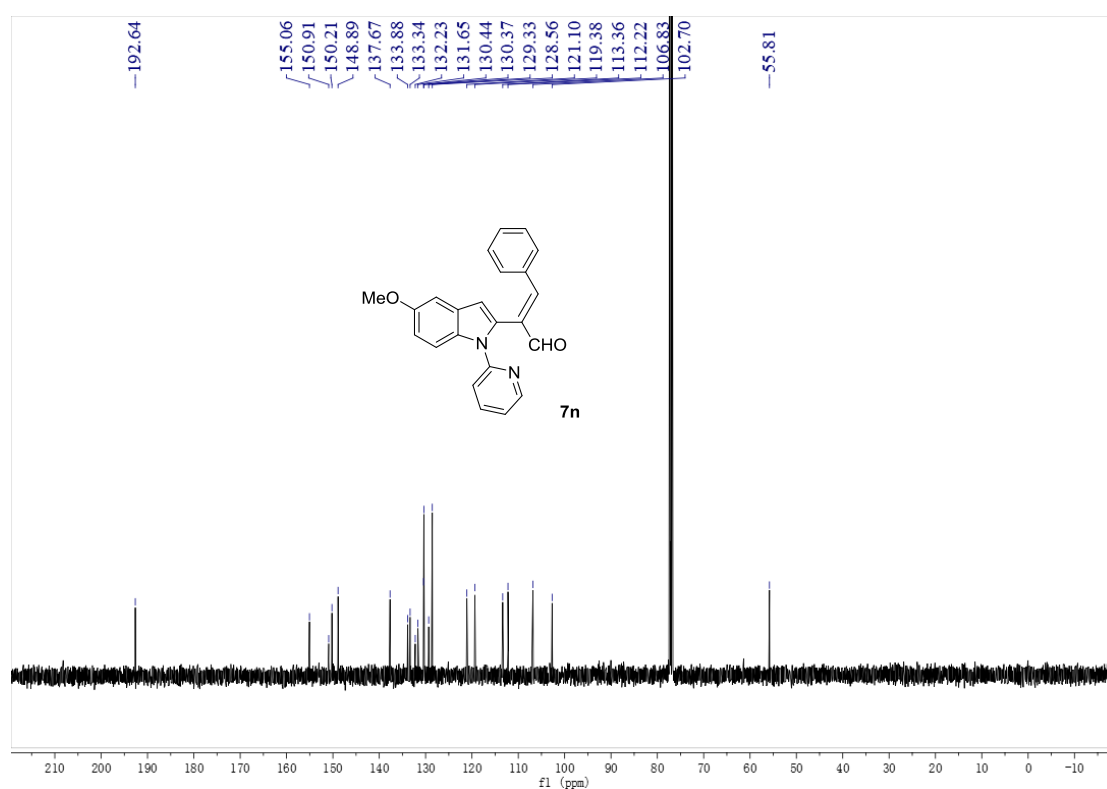

Supplementary Fig. 259 | <sup>13</sup>C NMR (101 MHz) of compound 7n (using CDCl<sub>3</sub> as solvent)

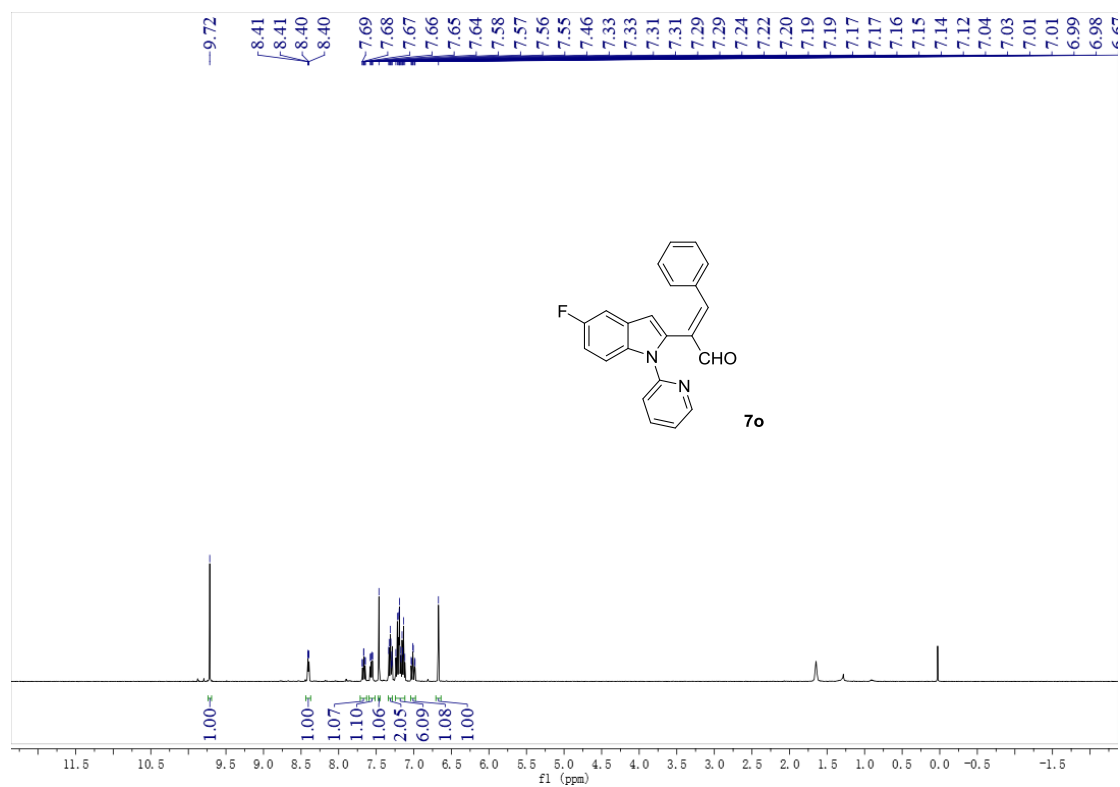

Supplementary Fig. 260 | <sup>1</sup>H NMR (400 MHz) of compound **7o** (using CDCl<sub>3</sub> as solvent)

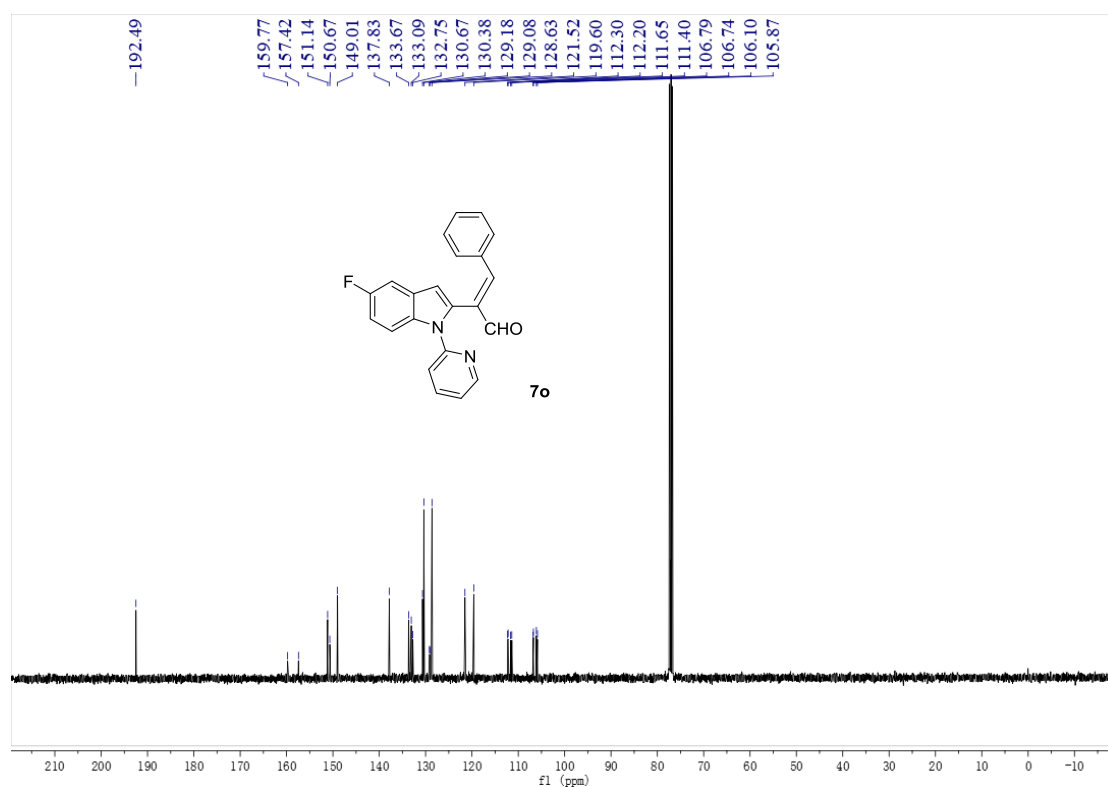

Supplementary Fig. 261 | <sup>13</sup>C NMR (101 MHz) of compound **7o** (using CDCl<sub>3</sub> as solvent)

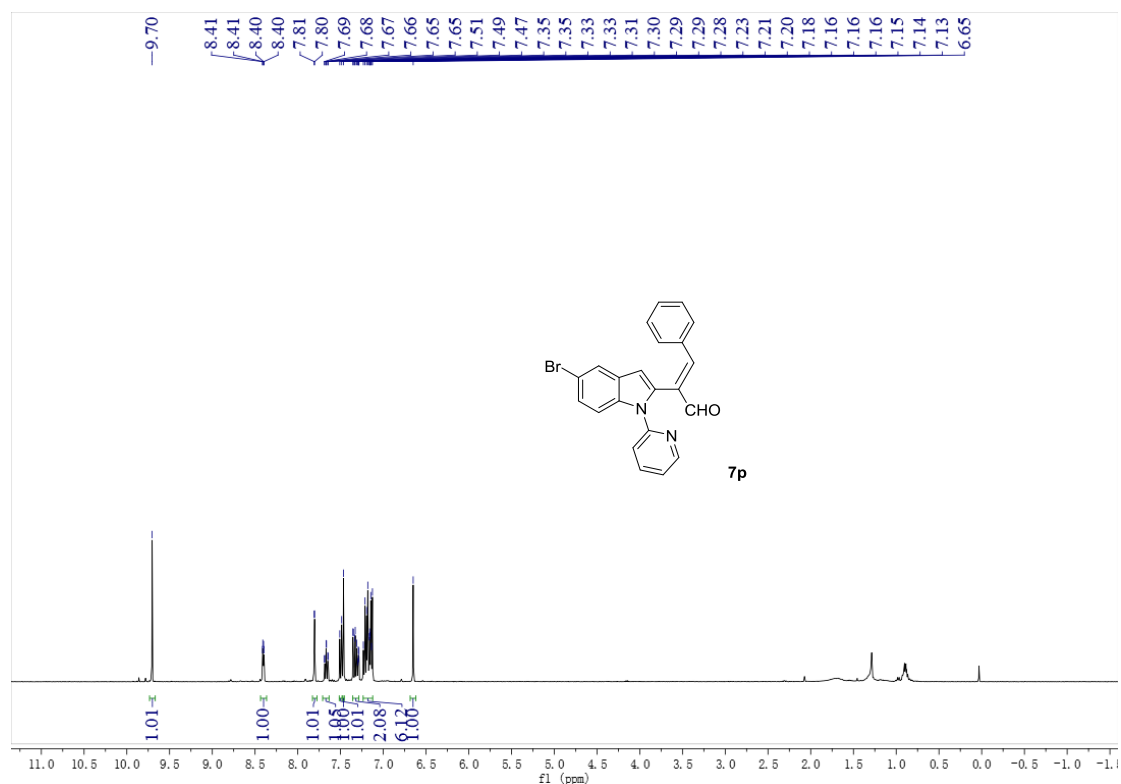

Supplementary Fig. 262 | <sup>1</sup>H NMR (400 MHz) of compound 7p (using CDCl<sub>3</sub> as solvent)

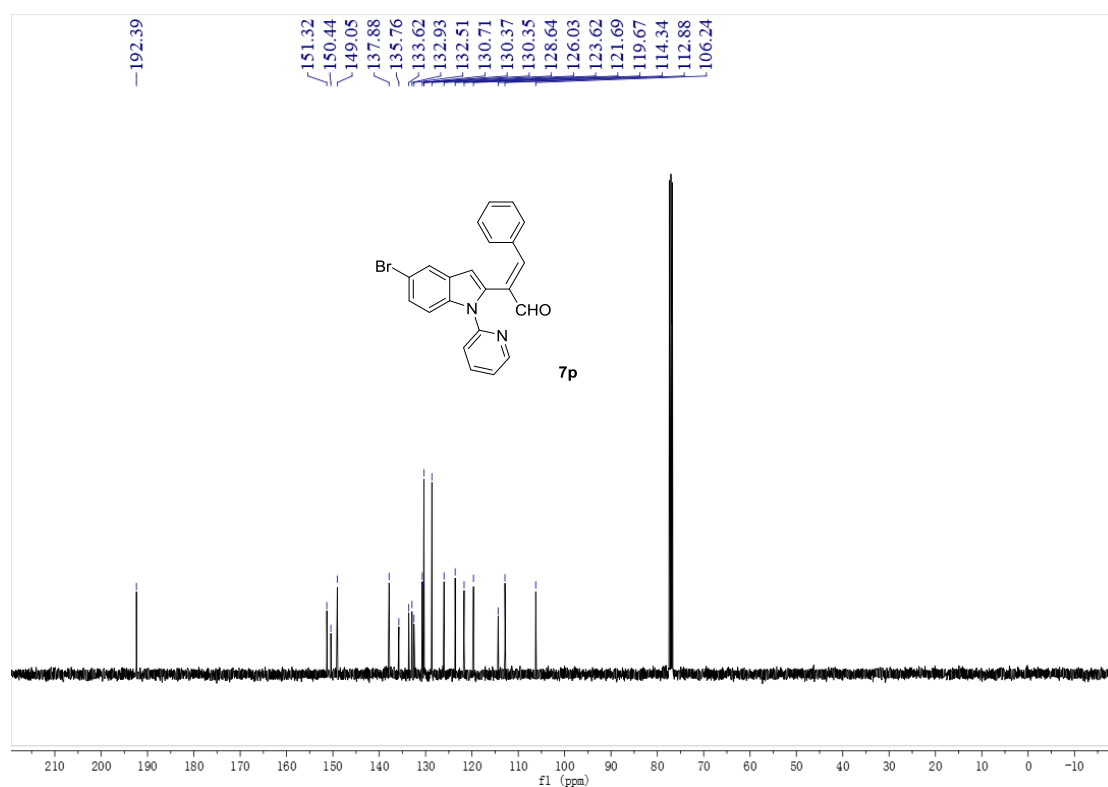

Supplementary Fig. 263 | <sup>13</sup>C NMR (101 MHz) of compound 7p (using CDCl<sub>3</sub> as solvent)

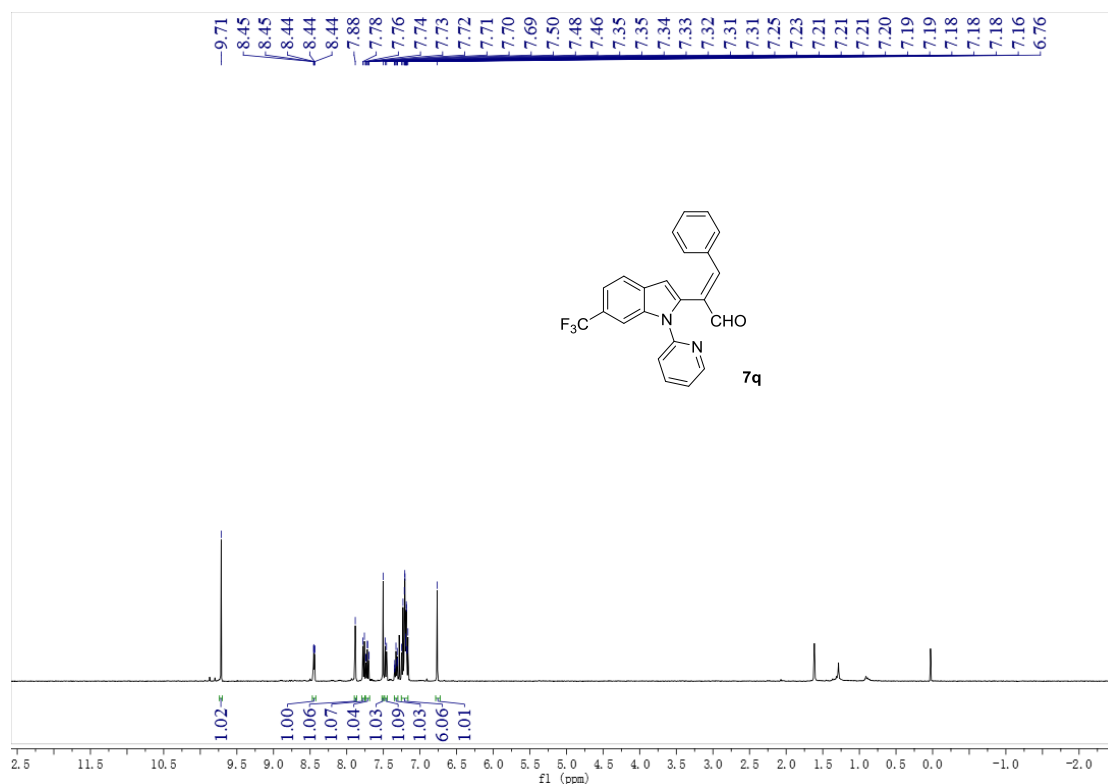

Supplementary Fig. 264 | <sup>1</sup>H NMR (400 MHz) of compound 7q (using CDCl<sub>3</sub> as solvent)

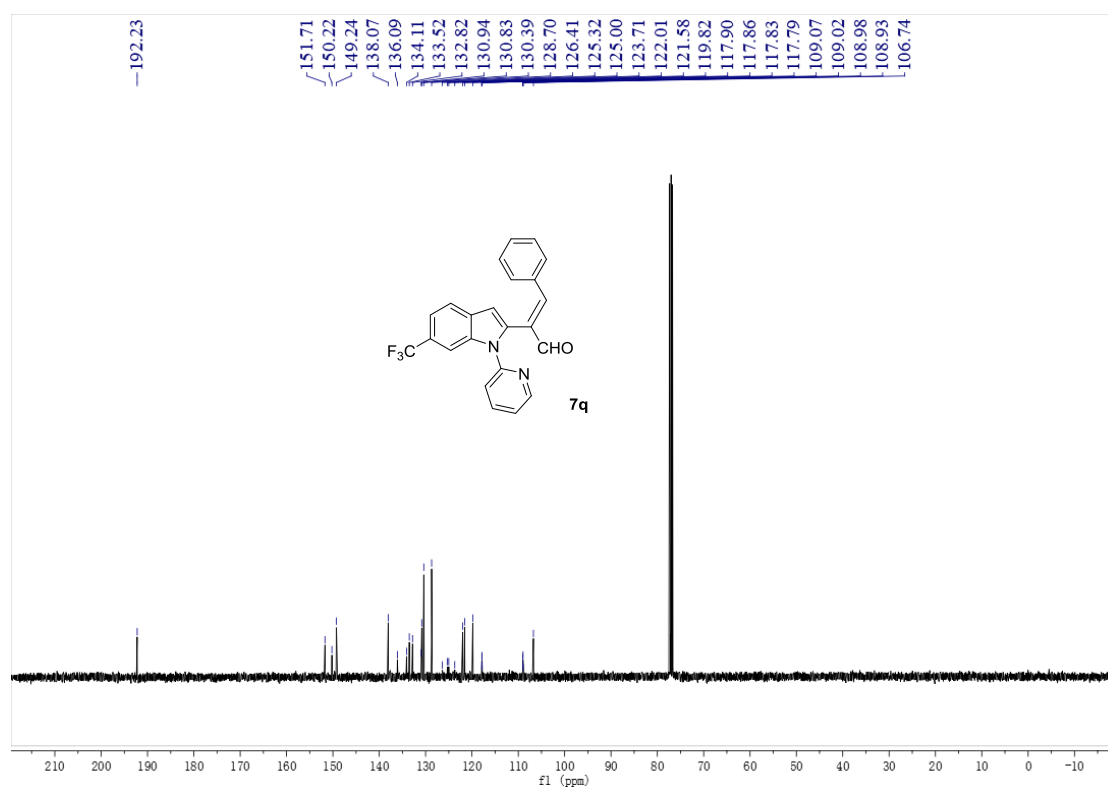

Supplementary Fig. 265 | <sup>13</sup>C NMR (101 MHz) of compound 7q (using CDCl<sub>3</sub> as solvent)

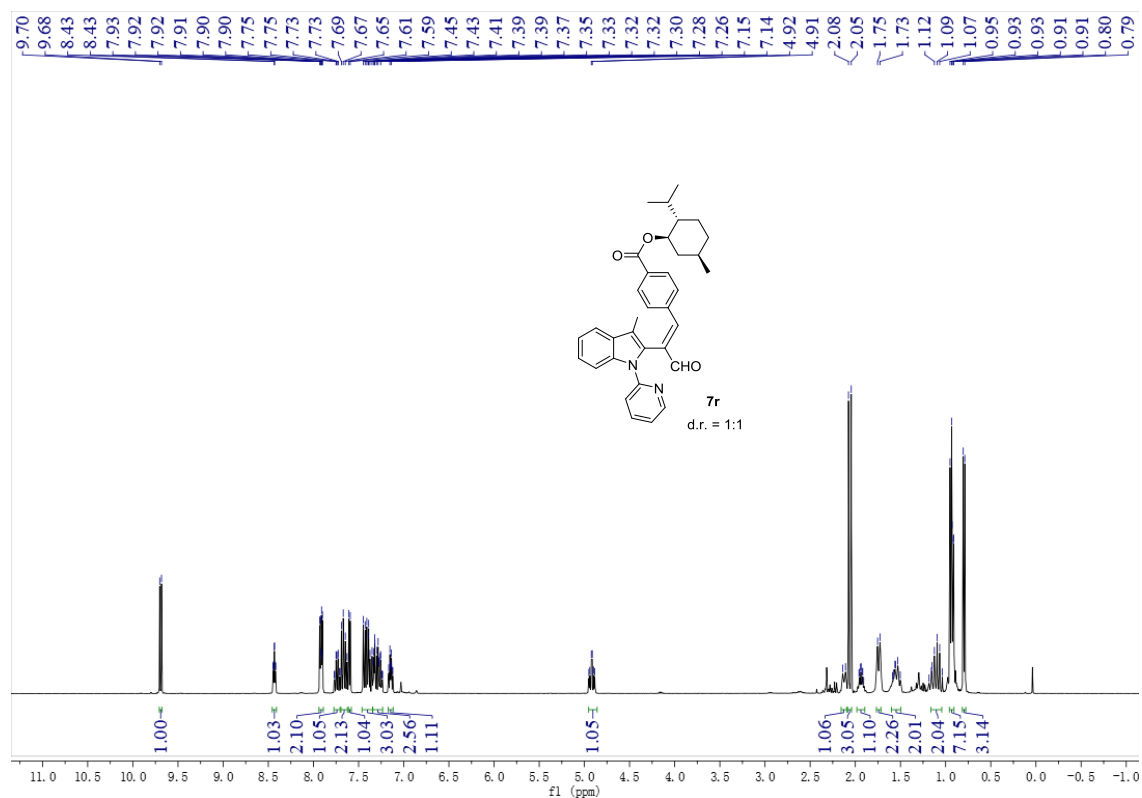

Supplementary Fig. 266 | <sup>1</sup>H NMR (400 MHz) of compound 7r (using CDCl<sub>3</sub> as solvent)

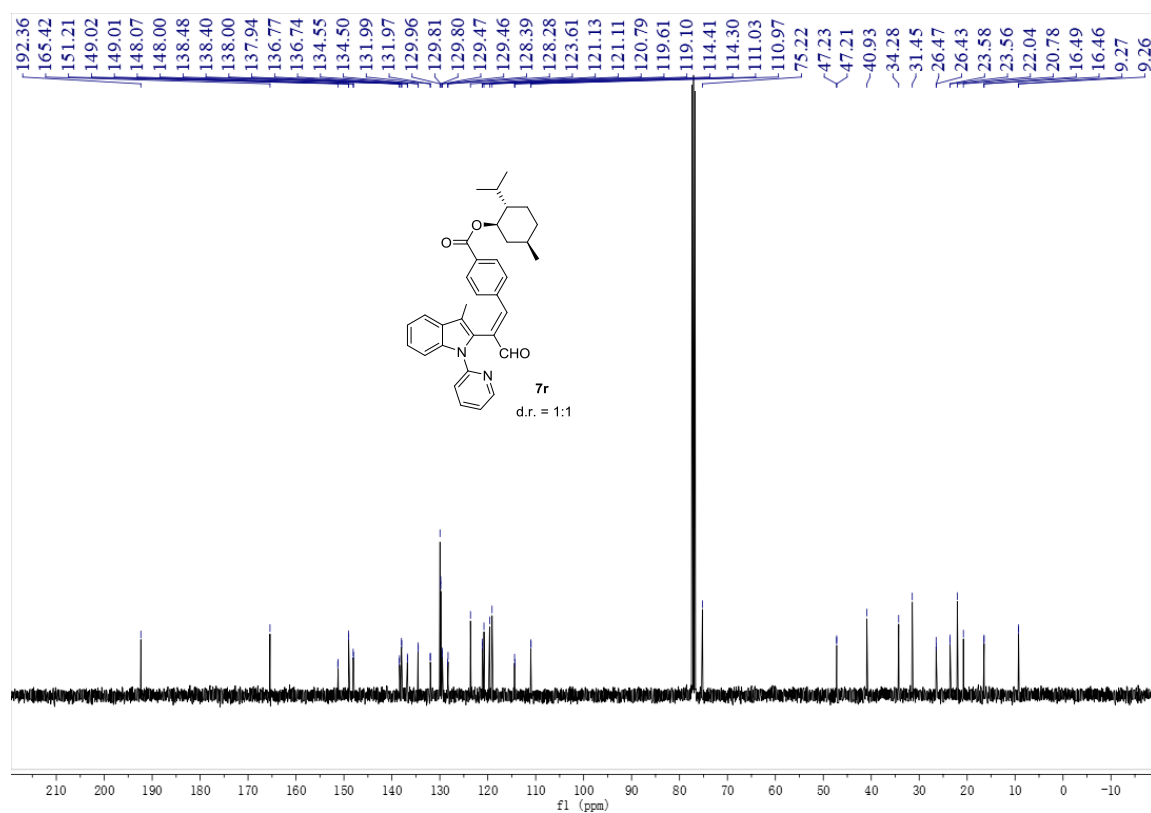

Supplementary Fig. 267 | <sup>13</sup>C NMR (101 MHz) of compound 7r (using CDCl<sub>3</sub> as solvent)



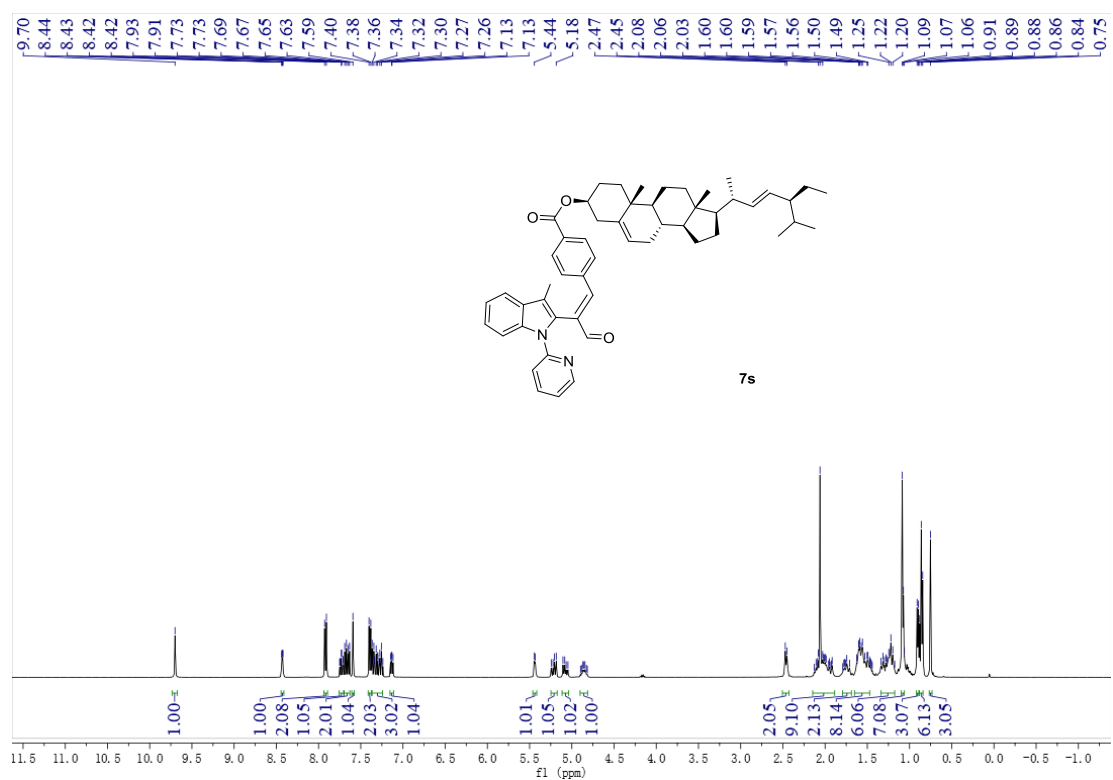

Supplementary Fig. 268 | <sup>1</sup>H NMR (400 MHz) of compound 7s (using CDCl<sub>3</sub> as solvent)

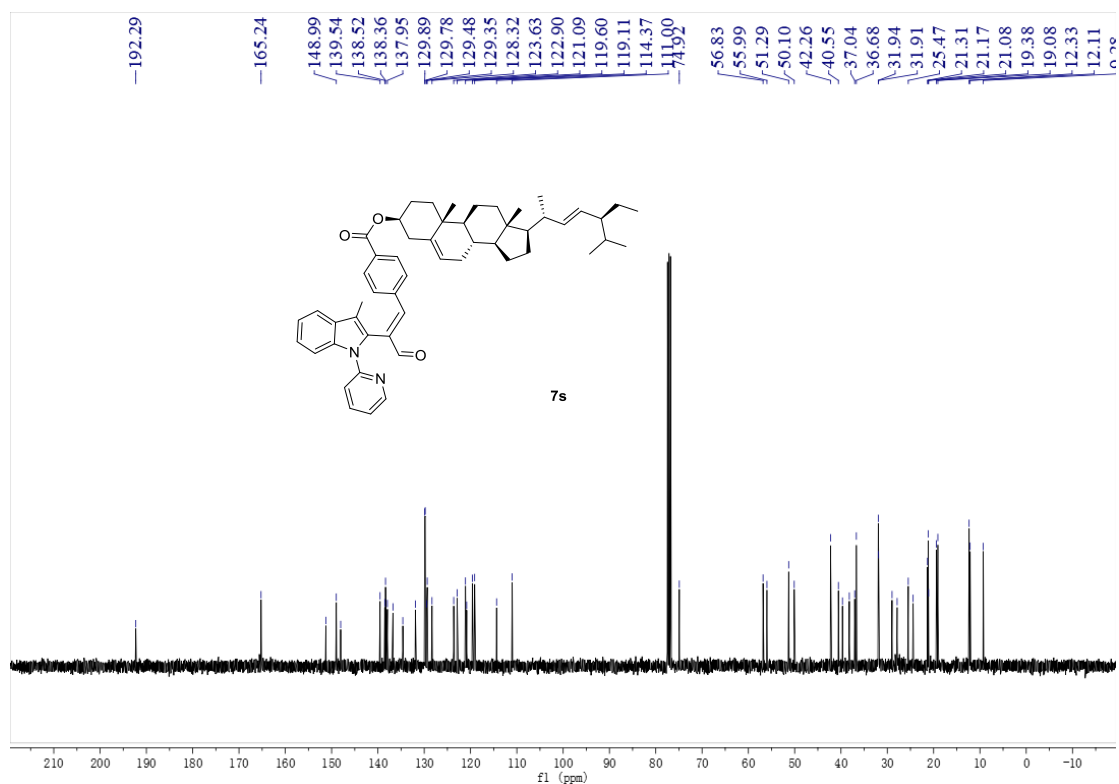

Supplementary Fig. 269 | <sup>13</sup>C NMR (101 MHz) of compound 7s (using CDCl<sub>3</sub> as solvent)

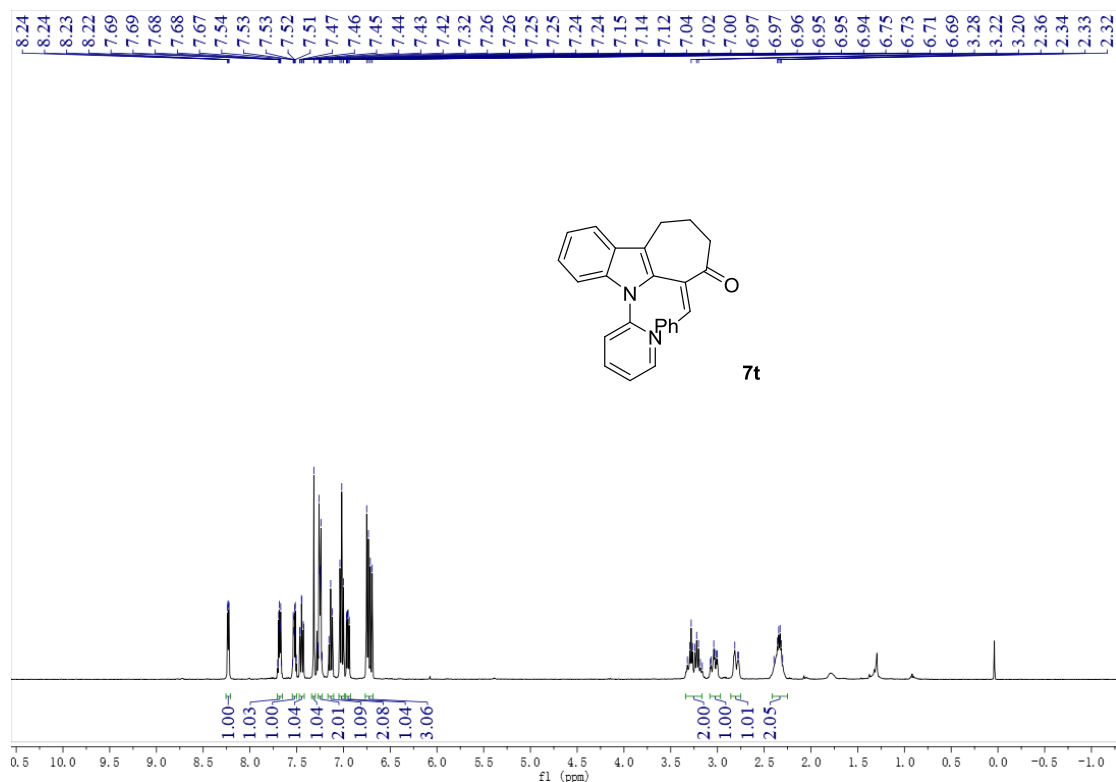

Supplementary Fig. 270 | <sup>1</sup>H NMR (400 MHz) of compound 7t (using CDCl<sub>3</sub> as solvent)

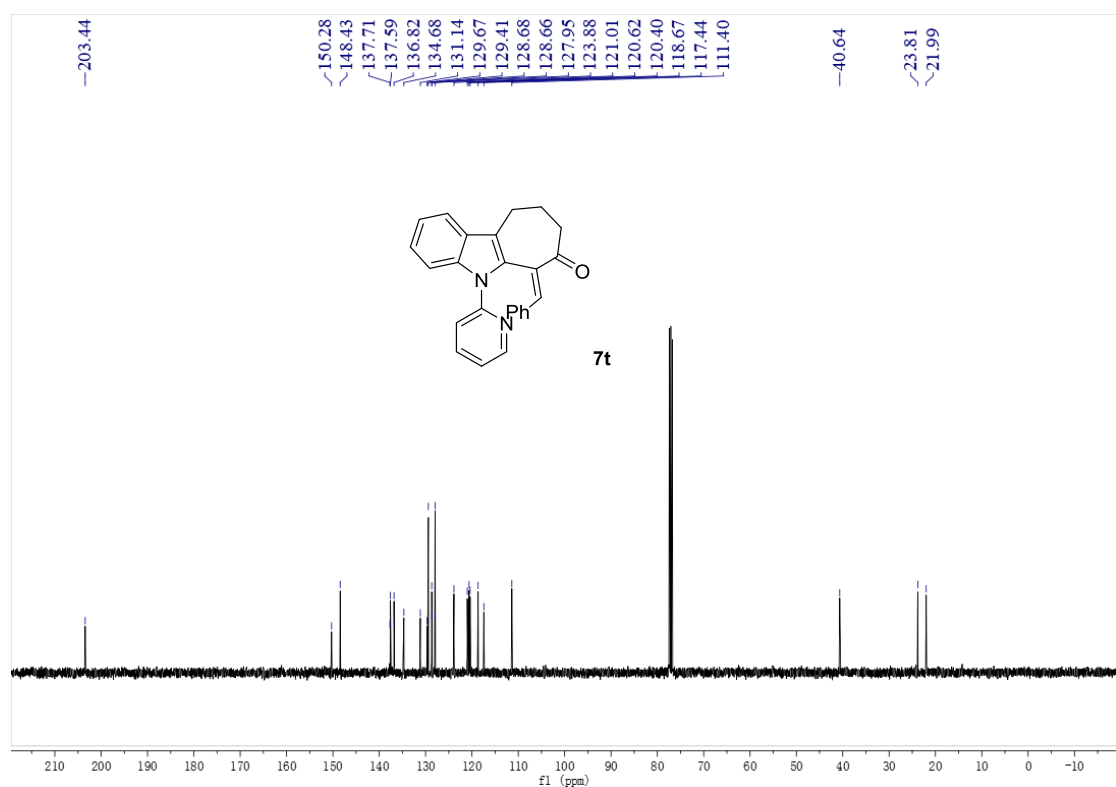

Supplementary Fig. 271 | <sup>13</sup>C NMR (101 MHz) of compound 7t (using CDCl<sub>3</sub> as solvent)

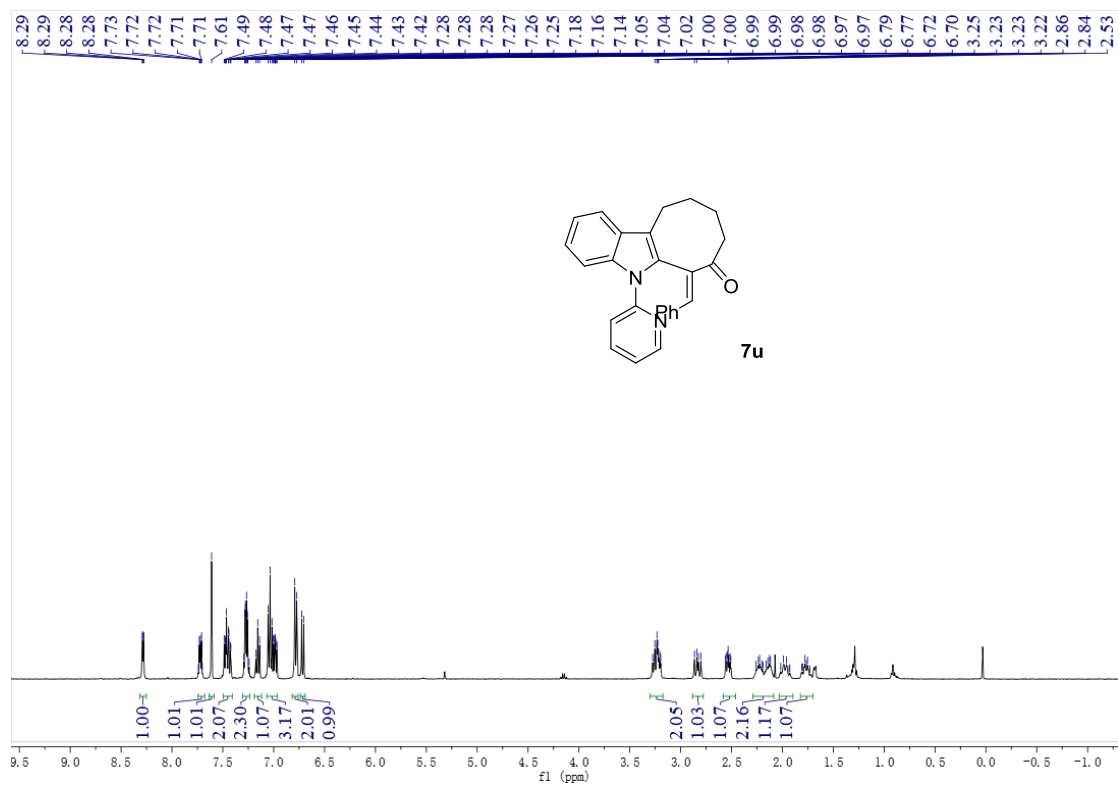

Supplementary Fig. 272 | <sup>1</sup>H NMR (400 MHz) of compound 7u (using CDCl<sub>3</sub> as solvent)

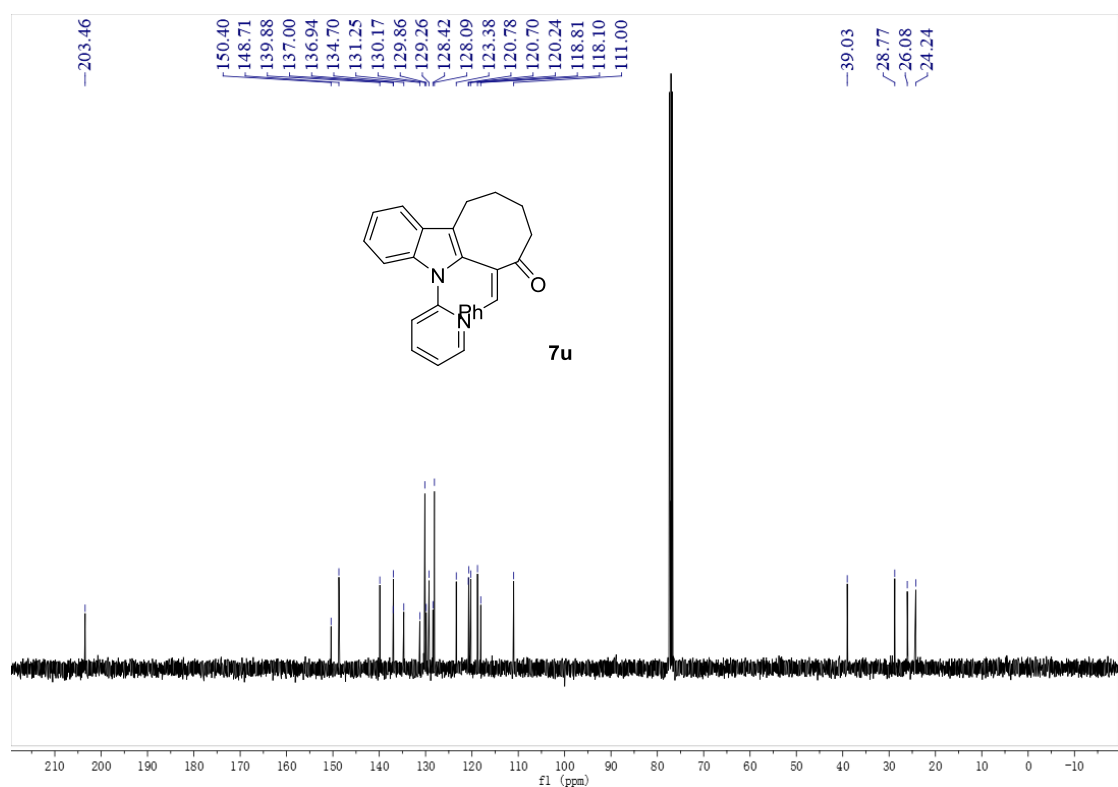

Supplementary Fig. 273 | <sup>13</sup>C NMR (101 MHz) of compound 7u (using CDCl<sub>3</sub> as solvent)

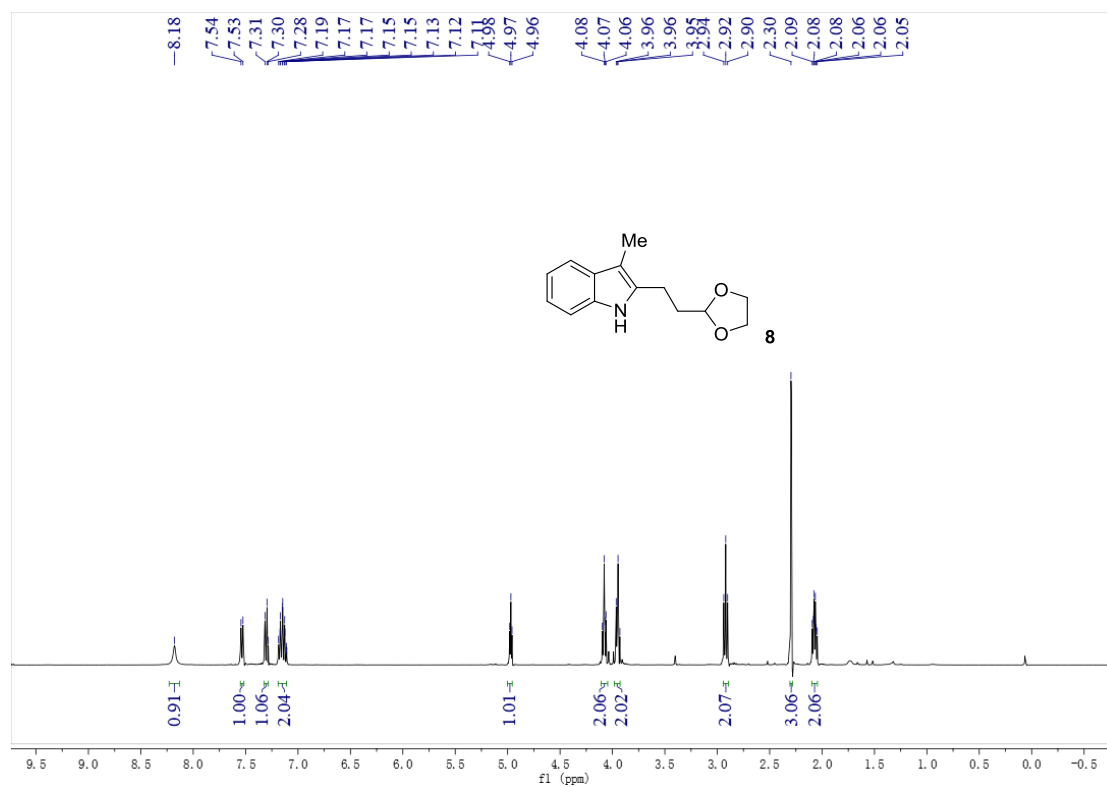

Supplementary Fig. 274 |  $^1\text{H}$  NMR (400 MHz) of compound 8 (using  $\text{CDCl}_3$  as solvent)

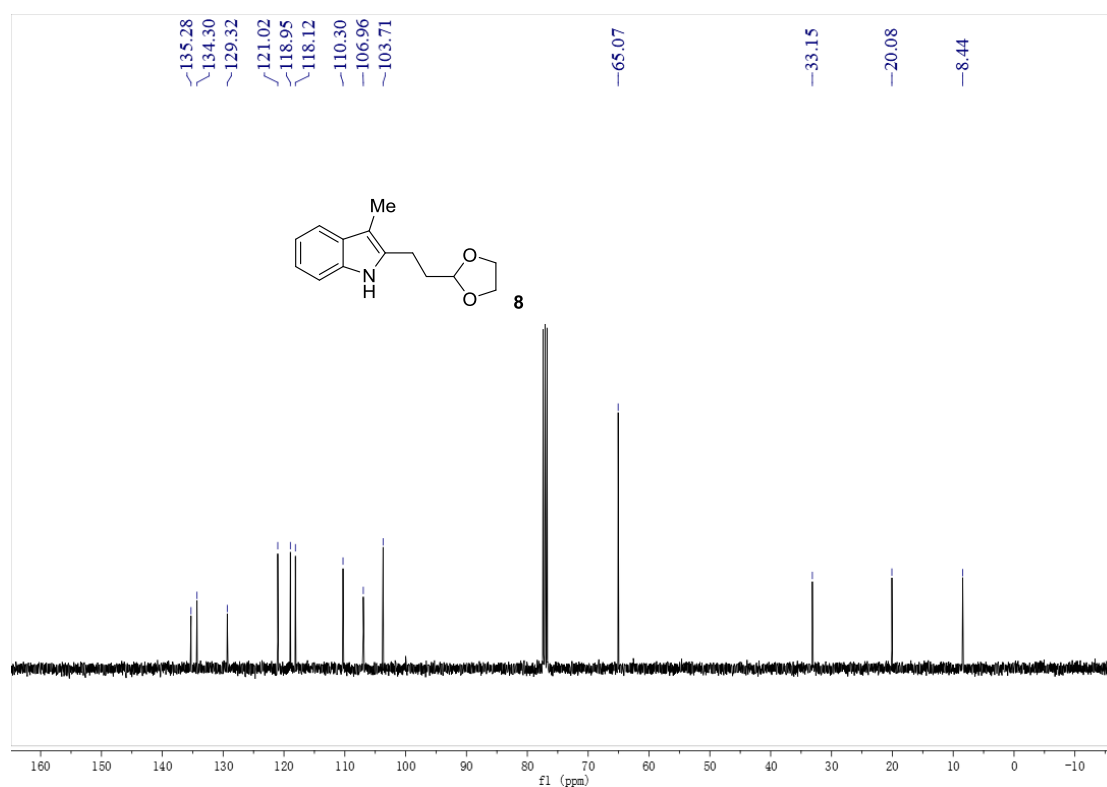

Supplementary Fig. 275 |  $^{13}\text{C}$  NMR (101 MHz) of compound 8 (using  $\text{CDCl}_3$  as solvent)

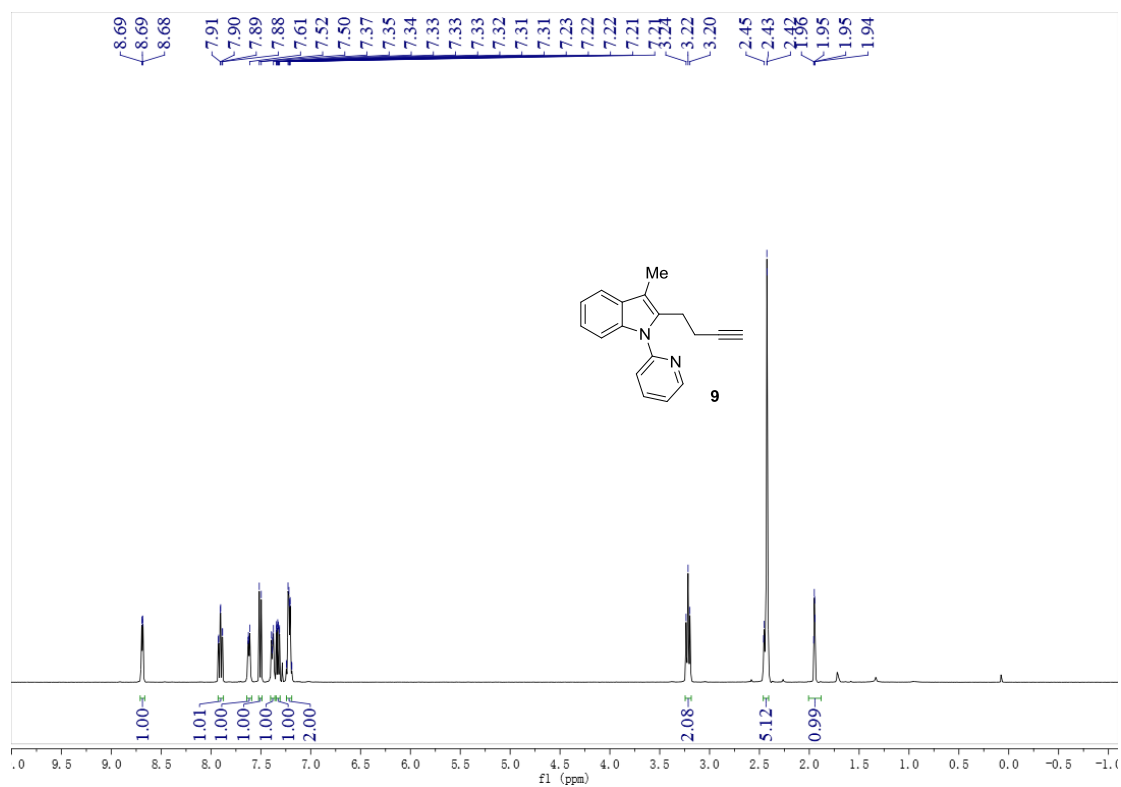

Supplementary Fig. 276 | <sup>1</sup>H NMR (400 MHz) of compound 9 (using CDCl<sub>3</sub> as solvent)

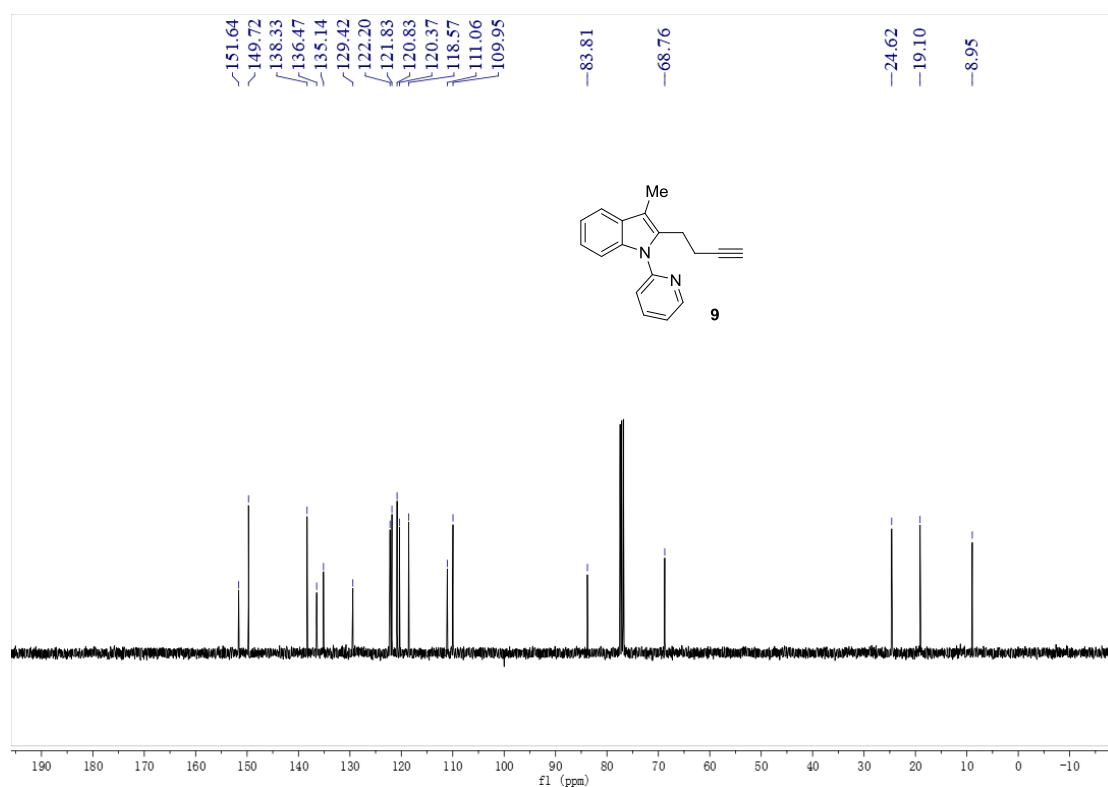

Supplementary Fig. 277 | <sup>13</sup>C NMR (101 MHz) of compound 9 (using CDCl<sub>3</sub> as solvent)

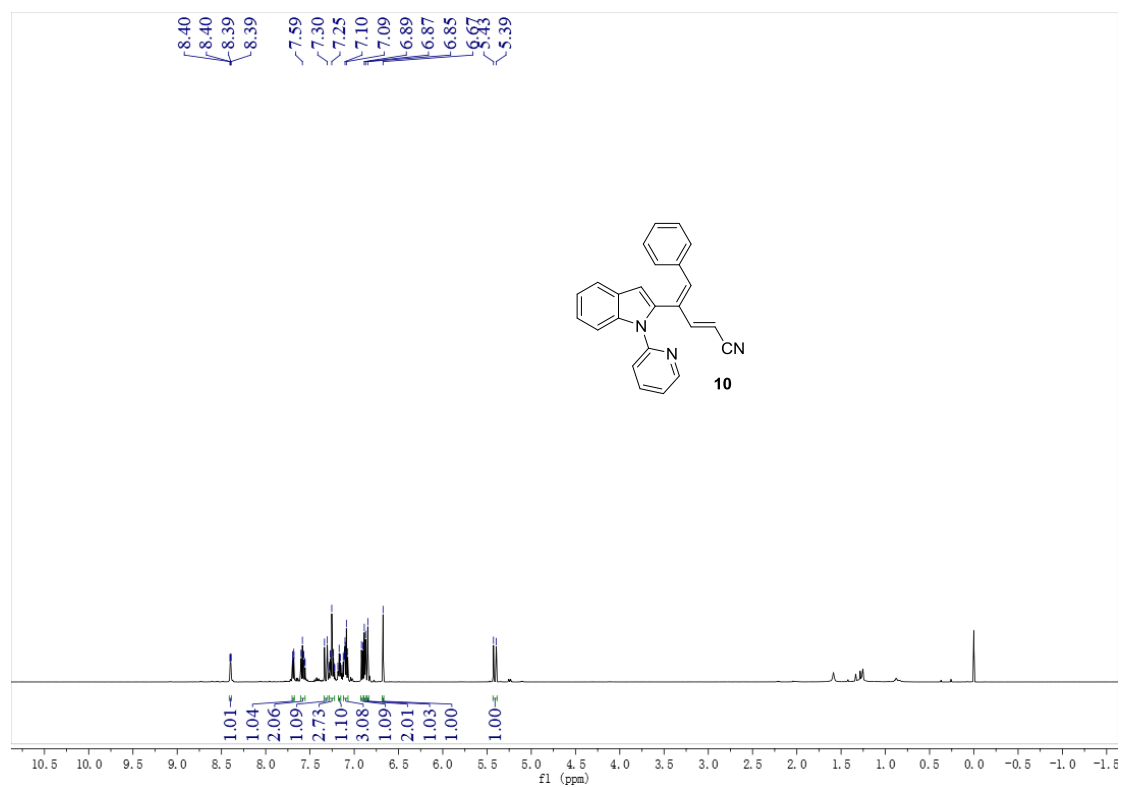

Supplementary Fig. 278 | <sup>1</sup>H NMR (500 MHz) of compound 10 (using CDCl<sub>3</sub> as solvent)

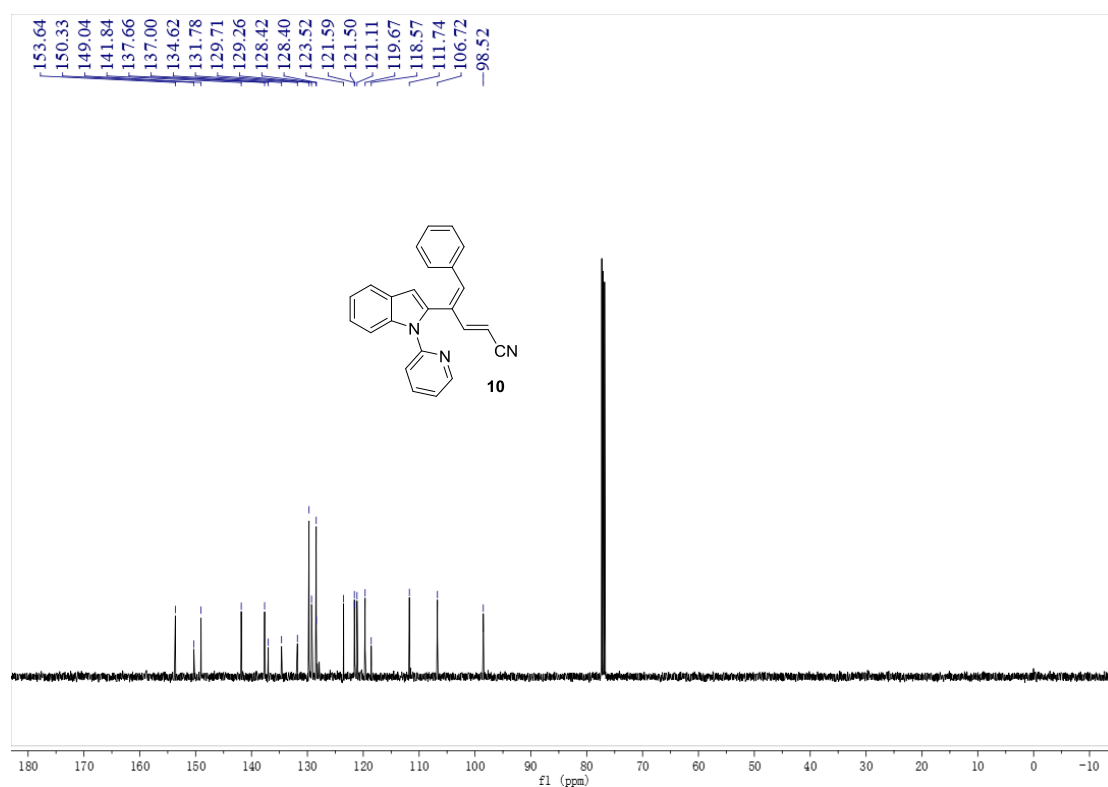

Supplementary Fig. 279 | <sup>13</sup>C NMR (126 MHz) of compound 10 (using CDCl<sub>3</sub> as solvent)

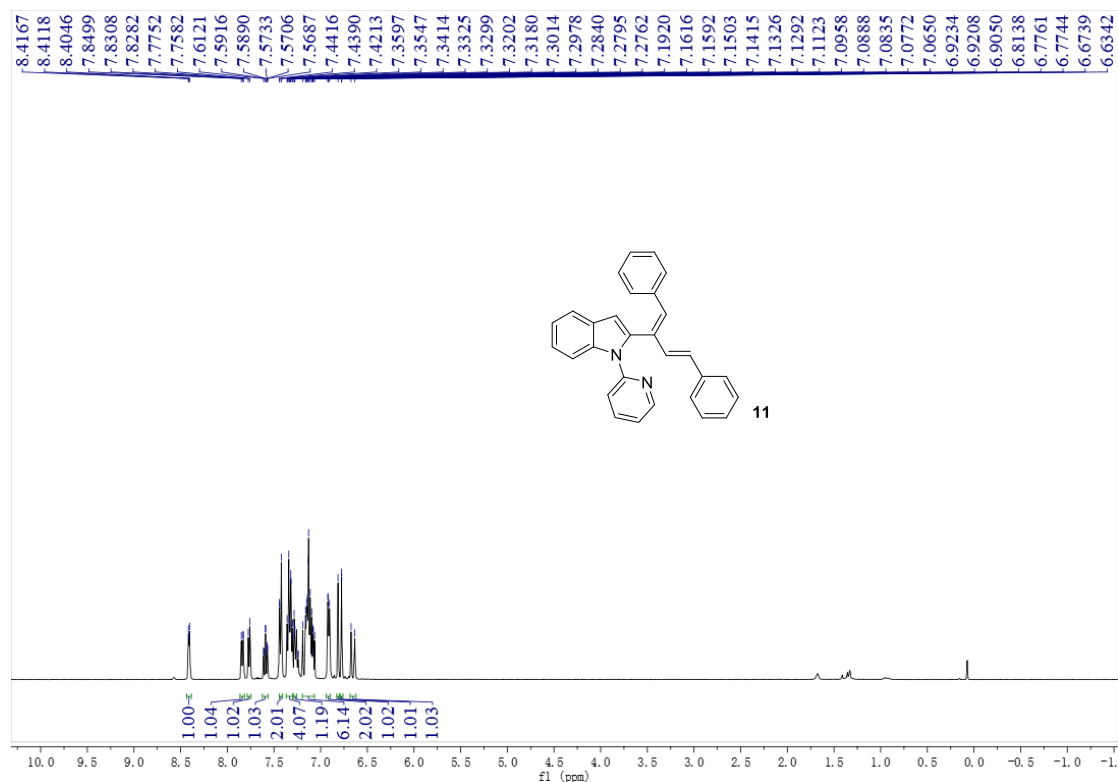

Supplementary Fig. 280 | <sup>1</sup>H NMR (400 MHz) of compound 11 (using CDCl<sub>3</sub> as solvent)

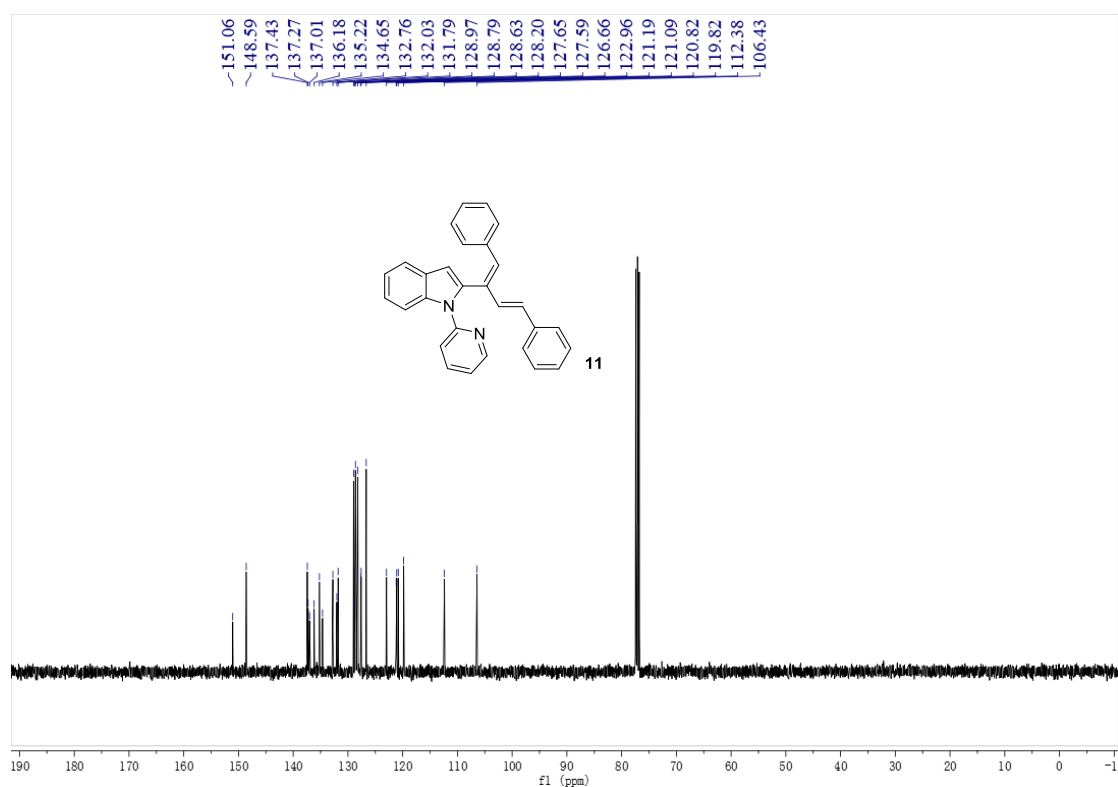

Supplementary Fig. 281 | <sup>13</sup>C NMR (101 MHz) of compound 11 (using CDCl<sub>3</sub> as solvent)

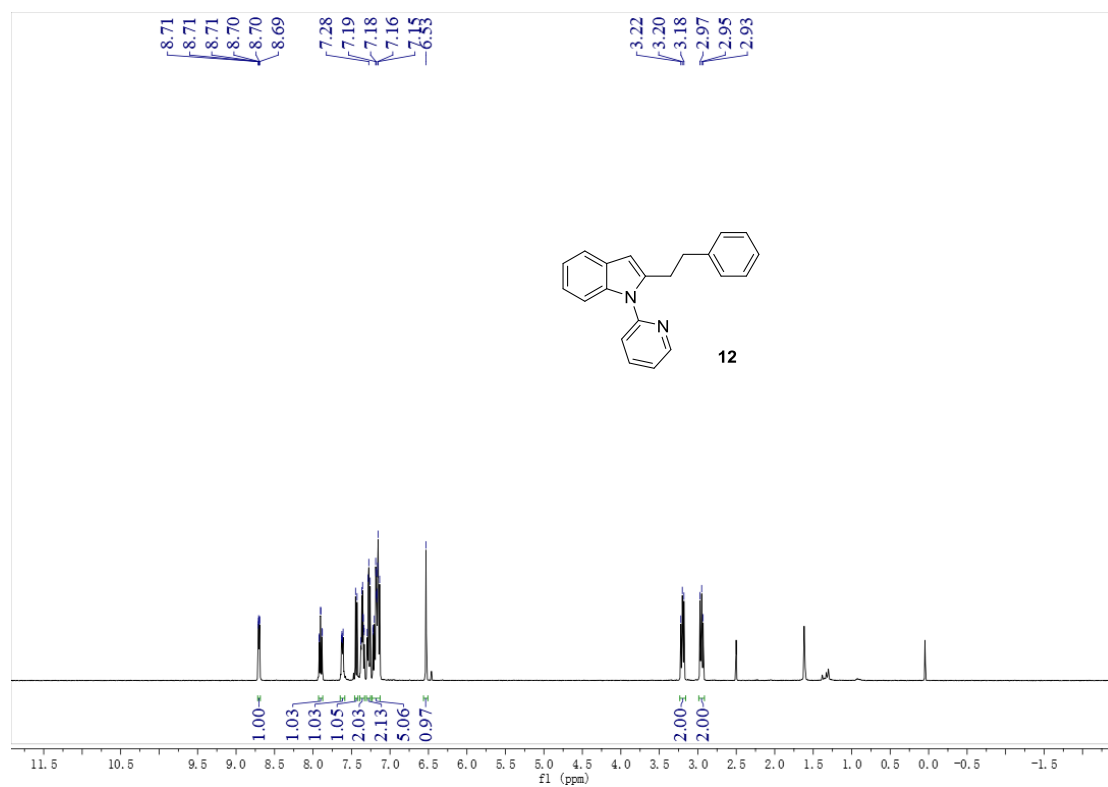

Supplementary Fig. 282 | <sup>1</sup>H NMR (400 MHz) of compound 12 (using CDCl<sub>3</sub> as solvent)

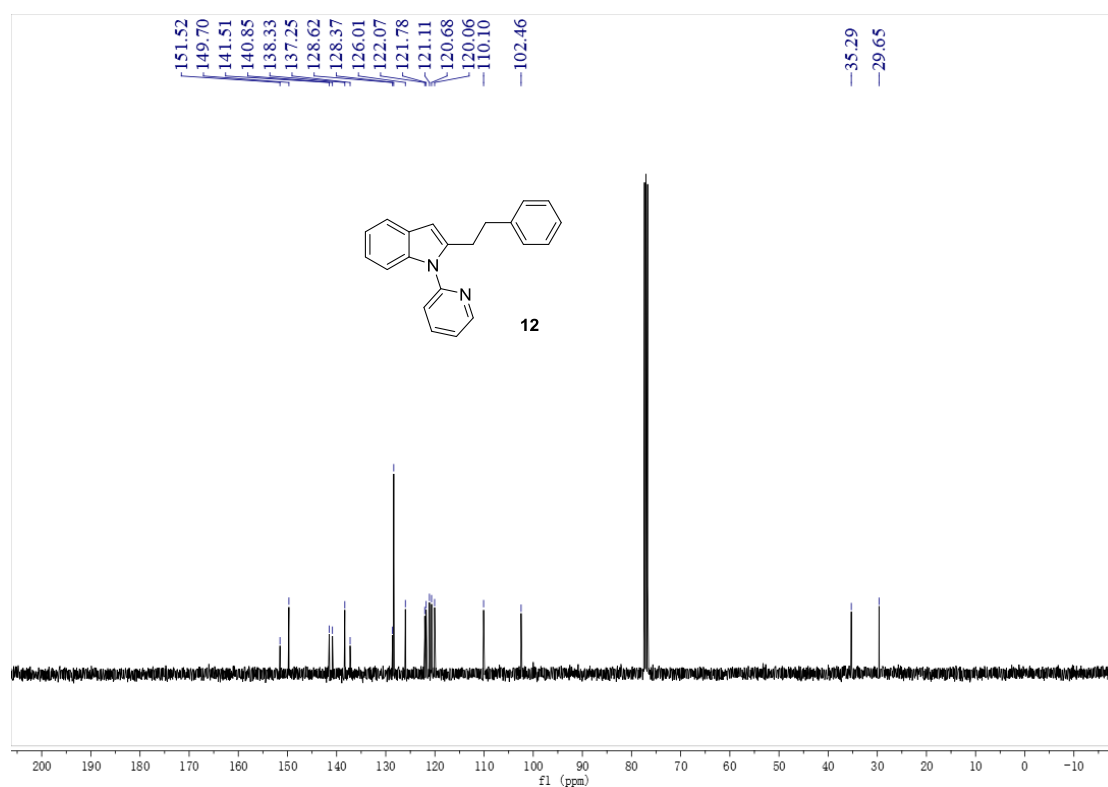

Supplementary Fig. 283 | <sup>13</sup>C NMR (101 MHz) of compound 12 (using CDCl<sub>3</sub> as solvent)



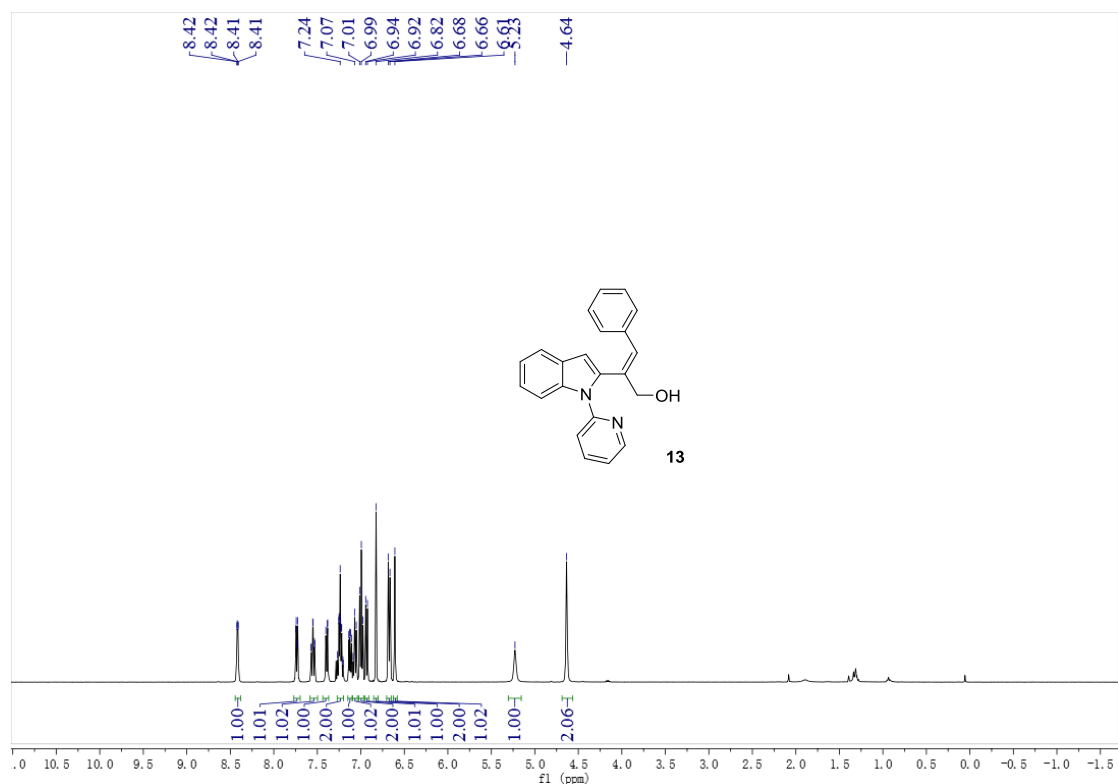

Supplementary Fig. 284 | <sup>1</sup>H NMR (400 MHz) of compound 13 (using CDCl<sub>3</sub> as solvent)

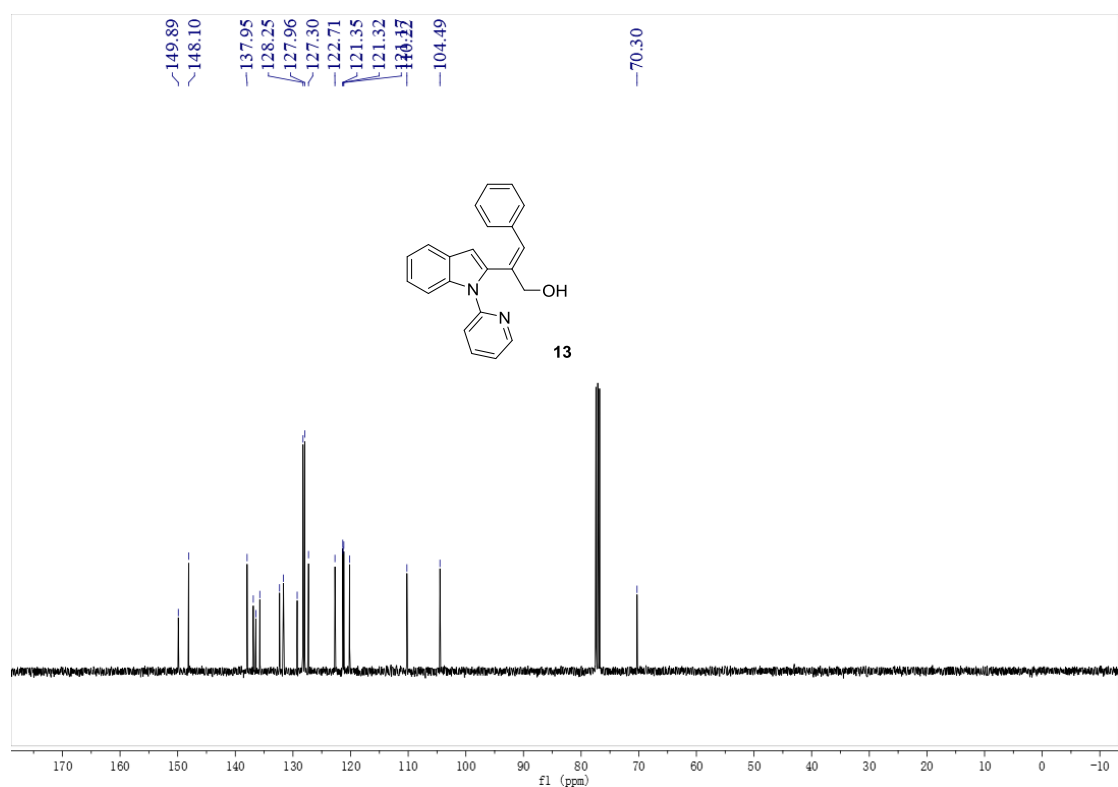

Supplementary Fig. 285 | <sup>13</sup>C NMR (101 MHz) of compound 13 (using CDCl<sub>3</sub> as solvent)

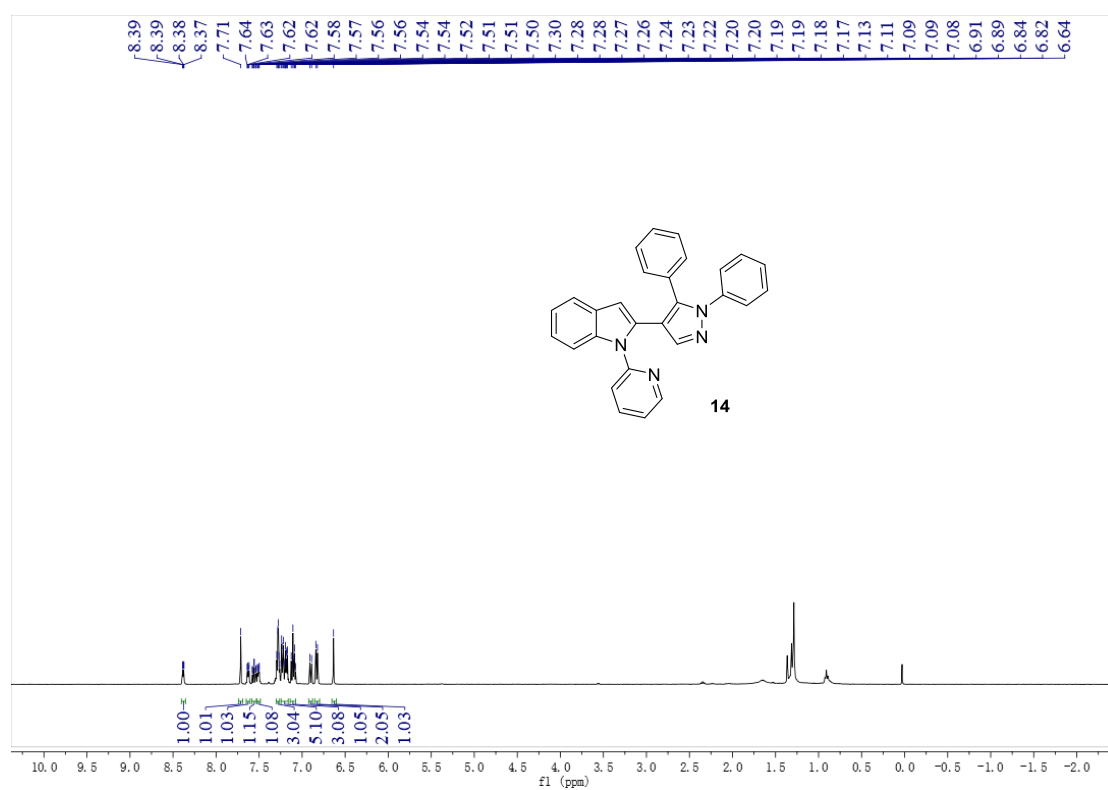

Supplementary Fig. 286 | <sup>1</sup>H NMR (400 MHz) of compound 14 (using CDCl<sub>3</sub> as solvent)

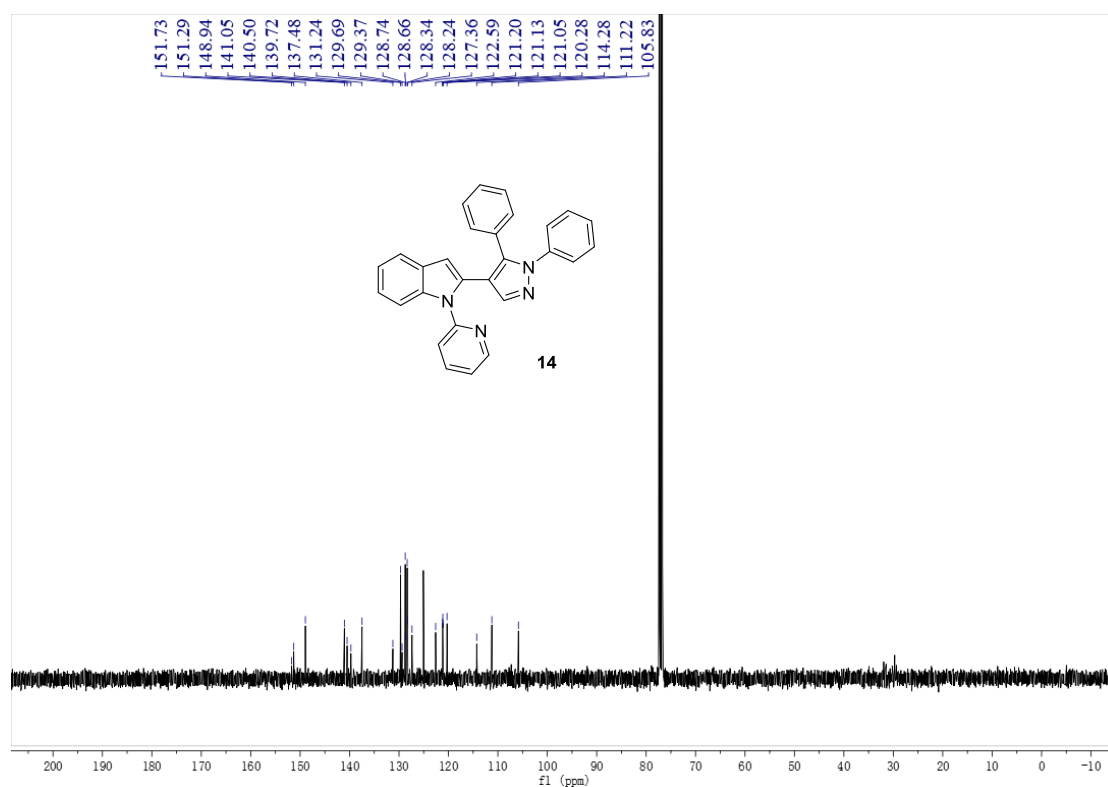

Supplementary Fig. 287 | <sup>13</sup>C NMR (101 MHz) of compound 14 (using CDCl<sub>3</sub> as solvent)

### III. HR-MS Spectrum of the New Products

#### HR-MS spectrum of S1-1

Spectrum from MASS20210609.wiff2 (sample 51) - Y4, +TOF MS (50 - 1000) from 0.132 to 0.167 min

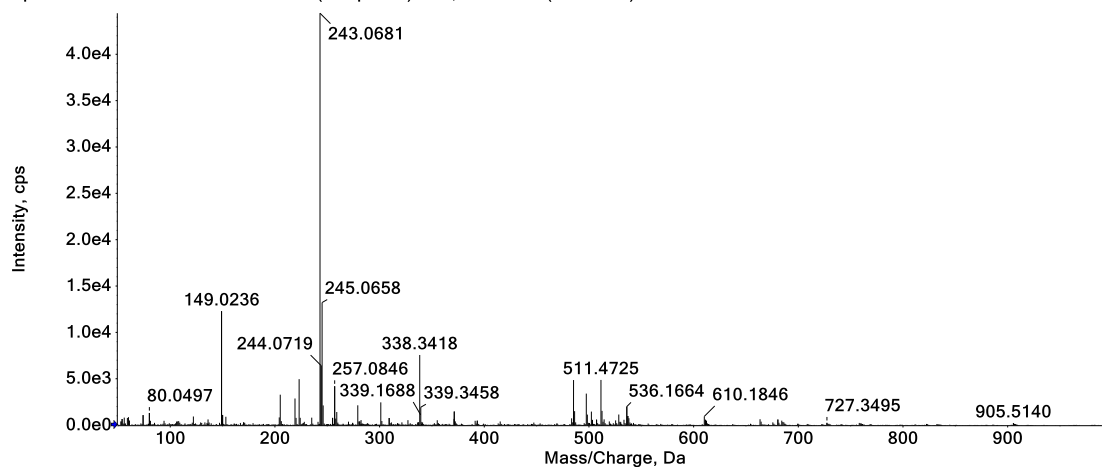

Spectrum from MASS20210609.wiff2 (sample 51) - Y4, +TOF MS (50 - 1000) from 0.132 to 0.167 min

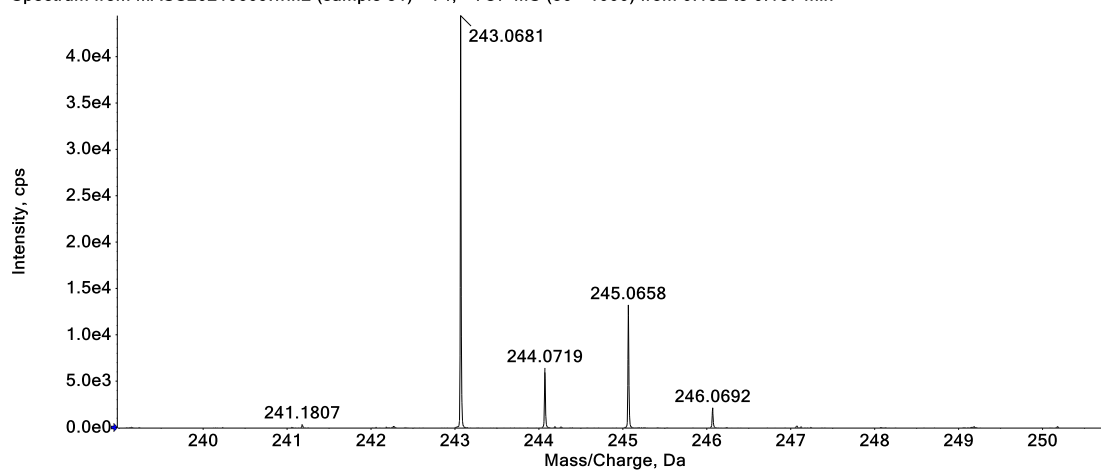

| Hit | Formula    | m/z      | RDB  | ppm  | MS Rank | MSMS ppm | MSMS Rank | Found |
|-----|------------|----------|------|------|---------|----------|-----------|-------|
| 1   | C14H11ClN2 | 243.0684 | 10.0 | -1.0 | 1       |          |           | NA/NA |

#### HR-MS spectrum of S1-2

Spectrum from MASS20210609.wiff2 (sample 70) - Y23, +TOF MS (50 - 1000) from 0.079 to 0.114 min

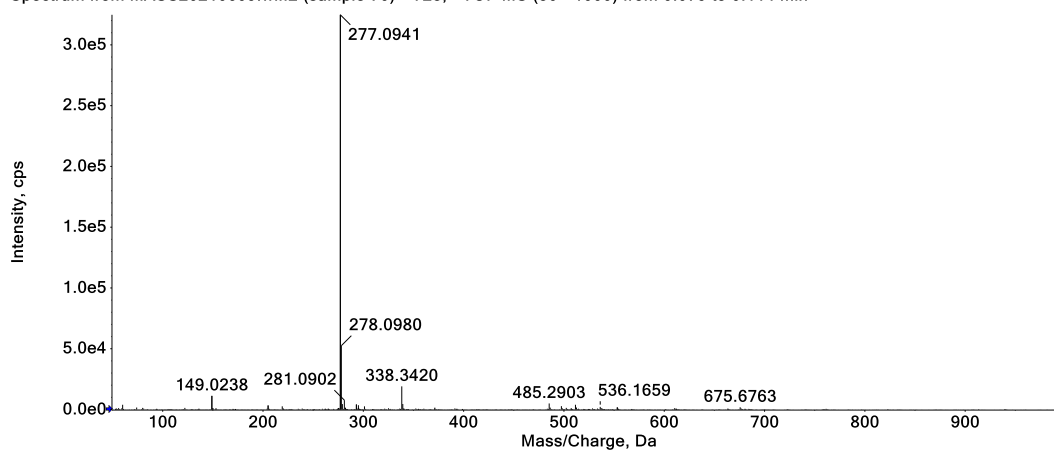

Spectrum from MASS20210609.wiff2 (sample 70) - Y23, +TOF MS (50 - 1000) from 0.079 to 0.114 min

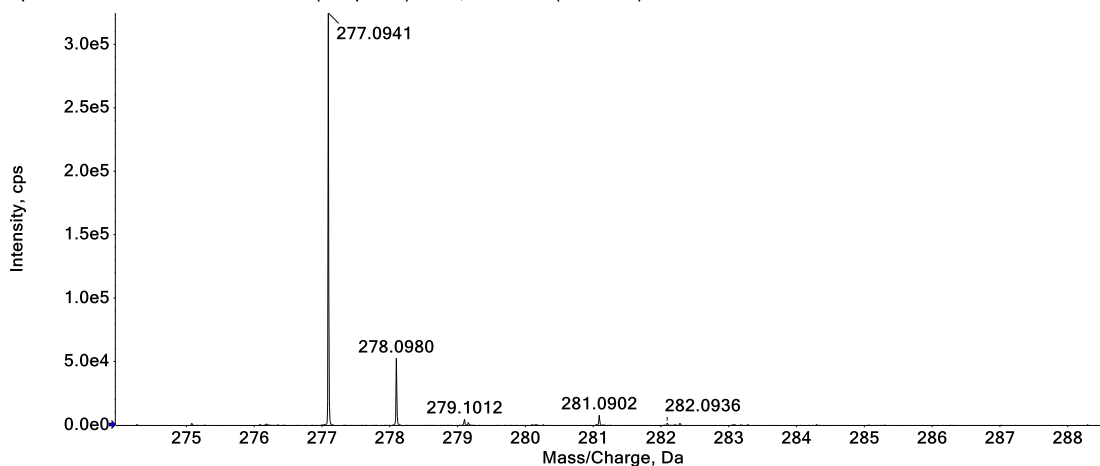

Spectrum from MASS20210609.wiff2 (sample 70) - Y23, +TOF MS (50 - 1000) from 0.079 to 0.114 min

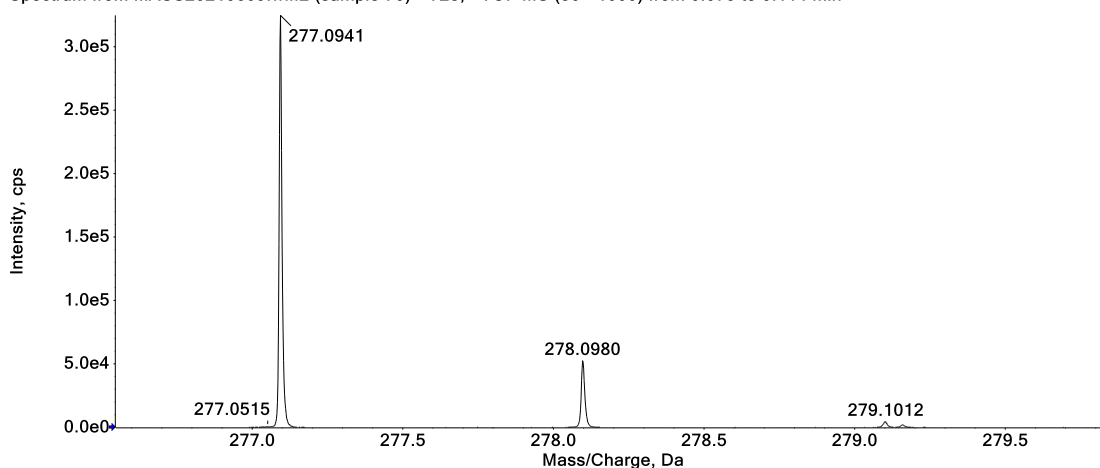

| Hit | Formula    | m/z      | RDB  | ppm  | MS Rank | MSMS ppm | MSMS Rank | Found |
|-----|------------|----------|------|------|---------|----------|-----------|-------|
| 1   | C15H11F3N2 | 277.0947 | 10.0 | -2.2 | 1       |          |           | NA/NA |

### HR-MS spectrum of S1-3

Spectrum from MASS20211013.wiff2 (sample 38) - Y14, +TOF MS (50 - 1000) from 0.114 to 0.184 min

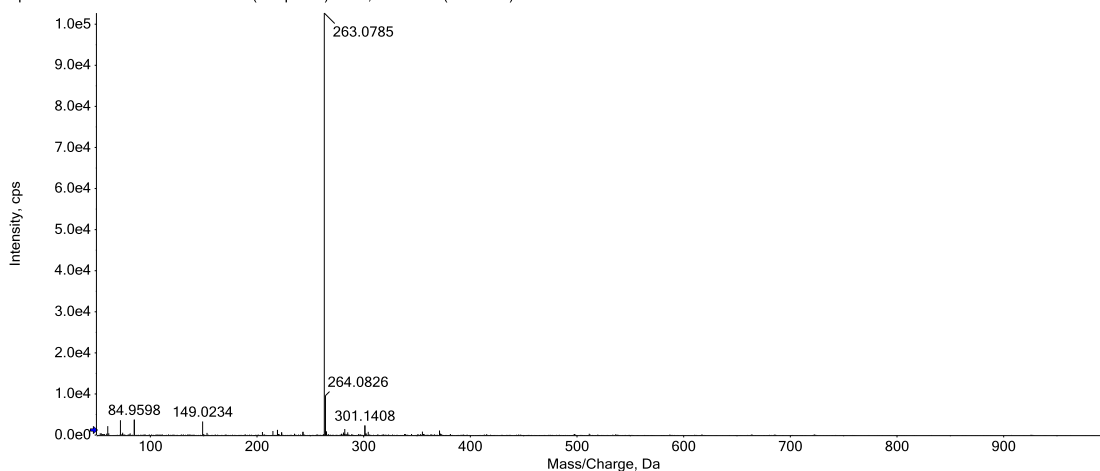

Spectrum from MASS20211013.wiff2 (sample 38) - Y14, +TOF MS (50 - 1000) from 0.114 to 0.184 min

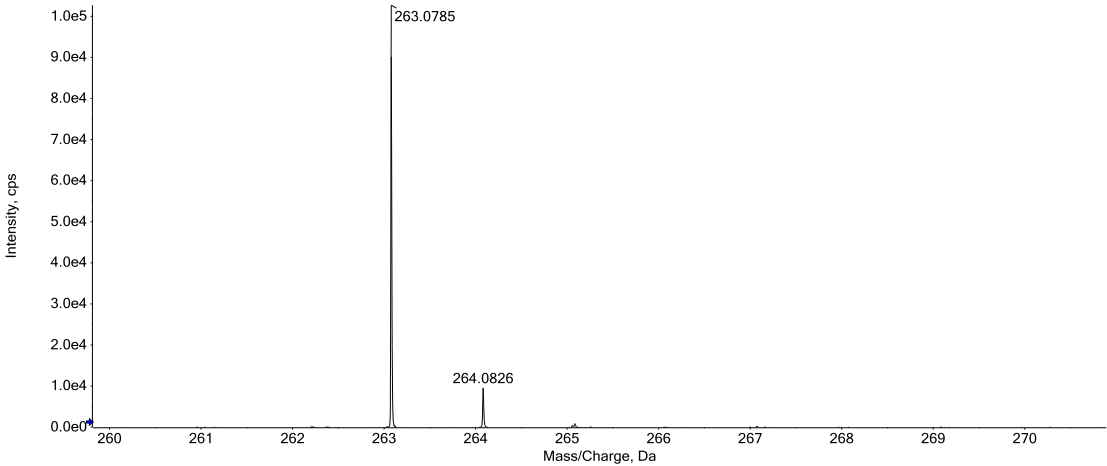

| Hit | Formula   | m/z       | RDB   | ppm   | MS Rank | MSMS ppm | MSMS Rank | Found |
|-----|-----------|-----------|-------|-------|---------|----------|-----------|-------|
| 1   | C14H9F3N2 | 263. 0791 | 10. 0 | -2. 1 | 1       |          |           | NA/NA |

HR-MS spectrum of S2-1

Spectrum from mass20220412.wiff2 (sample 41) - y1, Experiment 1, +IDA TOF MS (50 - 1000) from 0.032 to 0.134 min

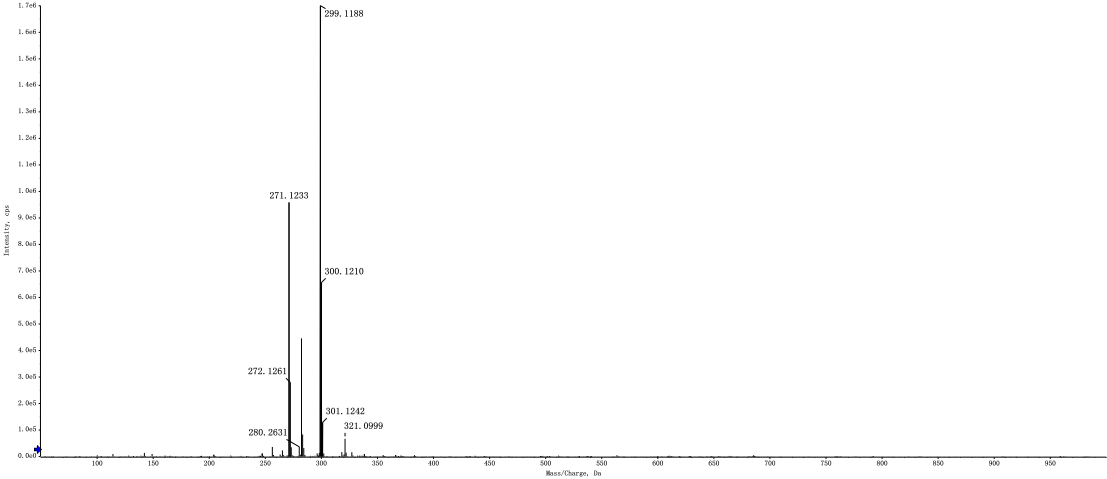

Spectrum from mass20220412.wiff2 (sample 41) - y1, Experiment 1, +IDA TOF MS (50 - 1000) from 0.032 to 0.134 min

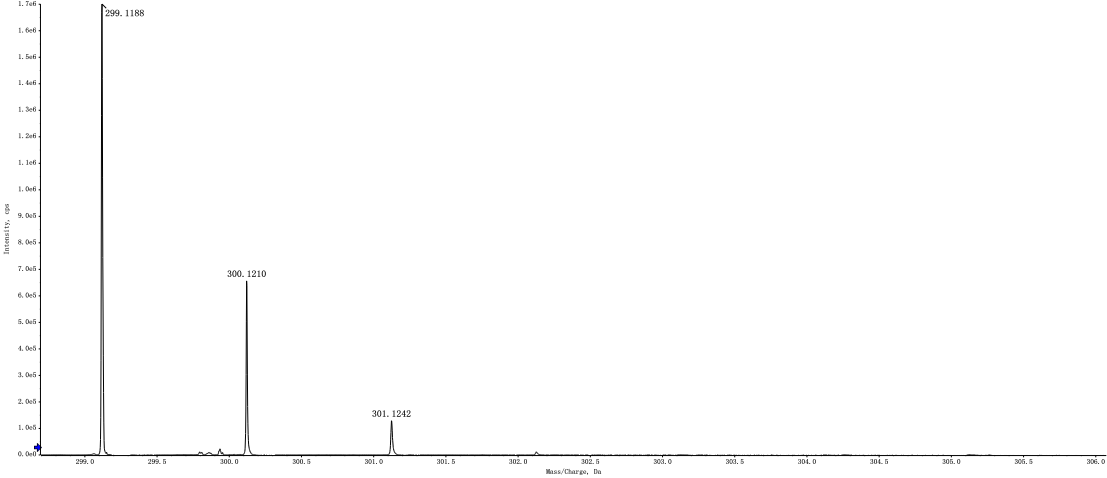

| Hit | Formula   | m/z       | RDB   | ppm  | MS Rank | MSMS ppm | MSMS Rank | Found |
|-----|-----------|-----------|-------|------|---------|----------|-----------|-------|
| 1   | C20H14N2O | 299. 1179 | 15. 0 | 3. 0 | 1       |          |           | NA/NA |

## HR-MS spectrum of S2-2

Spectrum from MASS20210609.wiff2 (sample 94) - Y47, +TOF MS (50 - 1000) from 0.140 to 0.176 min

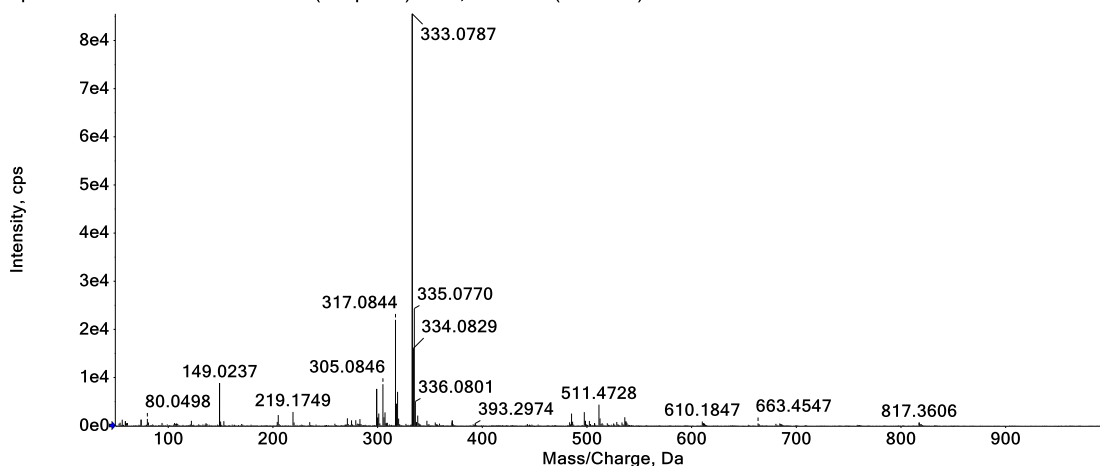

Spectrum from MASS20210609.wiff2 (sample 94) - Y47, +TOF MS (50 - 1000) from 0.140 to 0.176 min

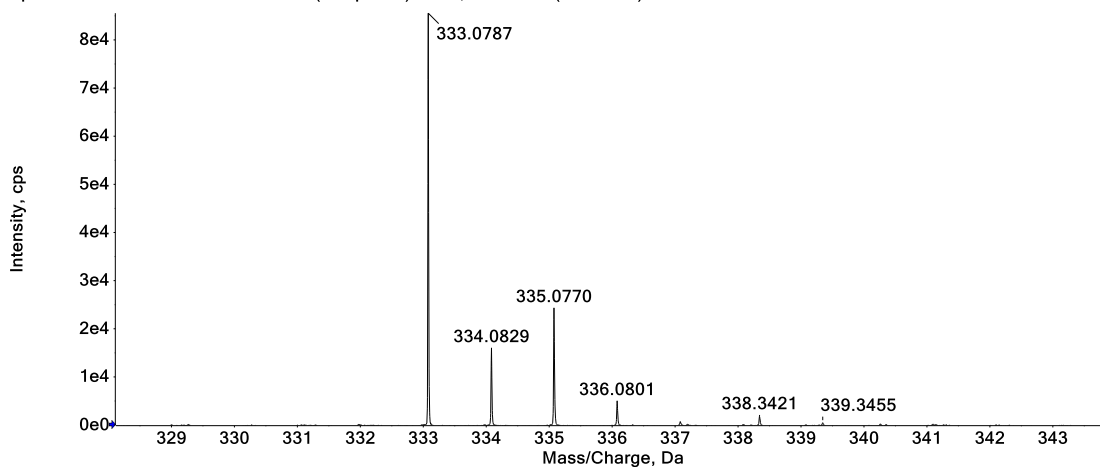

| Hit | Formula     | m/z      | RDB  | ppm  | MS Rank | MSMS ppm | MSMS Rank | Found |
|-----|-------------|----------|------|------|---------|----------|-----------|-------|
| 1   | C20H13C1N2O | 333.0789 | 15.0 | -0.7 | 1       |          |           | NA/NA |

## HR-MS spectrum of S2-3

Spectrum from MASS202100707.wiff2 (sample 2) - Y2, +TOF MS (50 - 1000) from 0.158 to 0.193 min

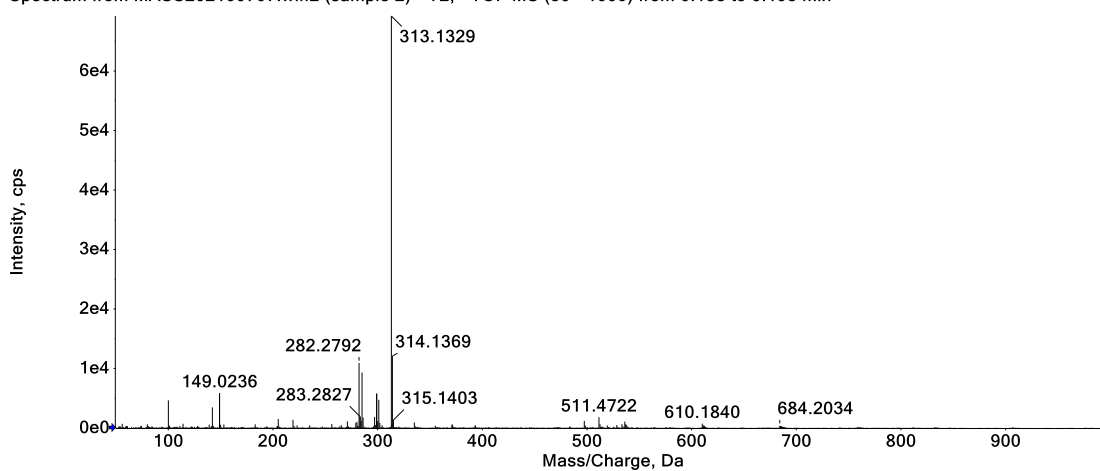

Spectrum from MASS202100707.wiff2 (sample 2) - Y2, +TOF MS (50 - 1000) from 0.158 to 0.193 min

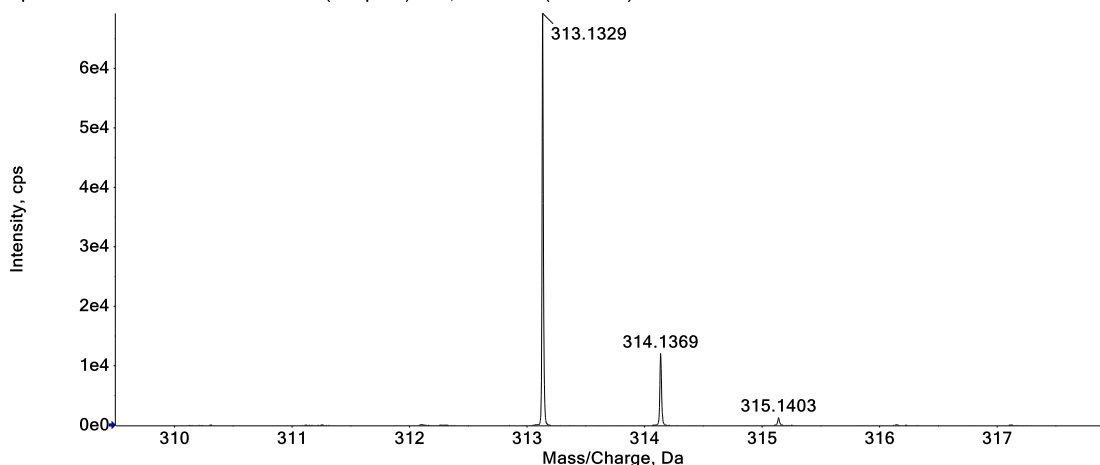

| Hit | Formula                                          | m/z      | RDB  | ppm  | MS Rank | MSMS ppm | MSMS Rank | Found |
|-----|--------------------------------------------------|----------|------|------|---------|----------|-----------|-------|
| 1   | C <sub>21</sub> H <sub>16</sub> N <sub>2</sub> O | 313.1335 | 15.0 | -2.0 | 1       |          |           | NA/NA |

## HR-MS spectrum of S2-4

Spectrum from MASS20211013.wiff2 (sample 30) - Y6, +TOF MS (50 - 1000) from 0.088 to 0.158 min

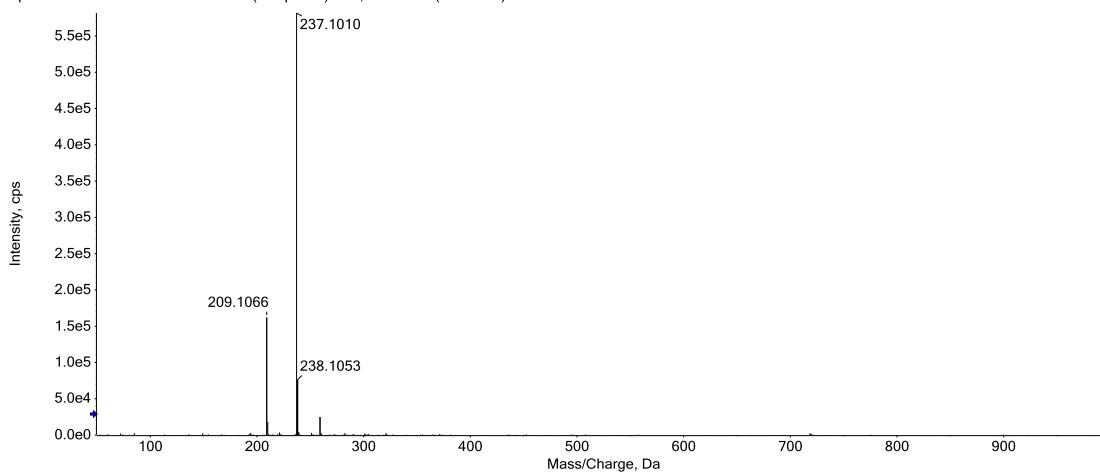

Spectrum from MASS20211013.wiff2 (sample 30) - Y6, +TOF MS (50 - 1000) from 0.088 to 0.158 min

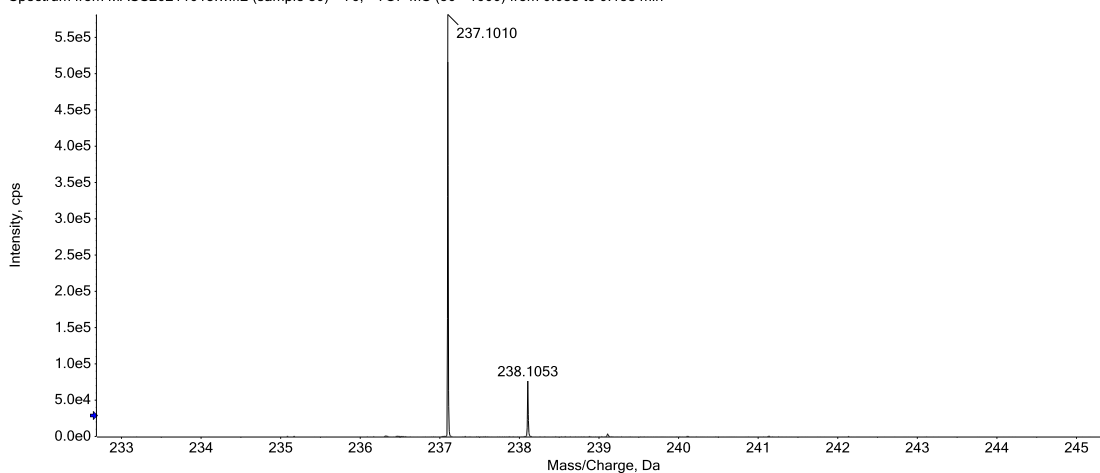

| Hit | Formula                                          | m/z      | RDB  | ppm  | MS Rank | MSMS ppm | MSMS Rank | Found |
|-----|--------------------------------------------------|----------|------|------|---------|----------|-----------|-------|
| 1   | C <sub>15</sub> H <sub>12</sub> N <sub>2</sub> O | 237.1022 | 11.0 | -3.1 | 1       |          |           | NA/NA |

## HR-MS spectrum of S2-5

Spectrum from MASS20211013.wiff2 (sample 33) - Y9, +TOF MS (50 - 1000) from 0.123 to 0.193 min

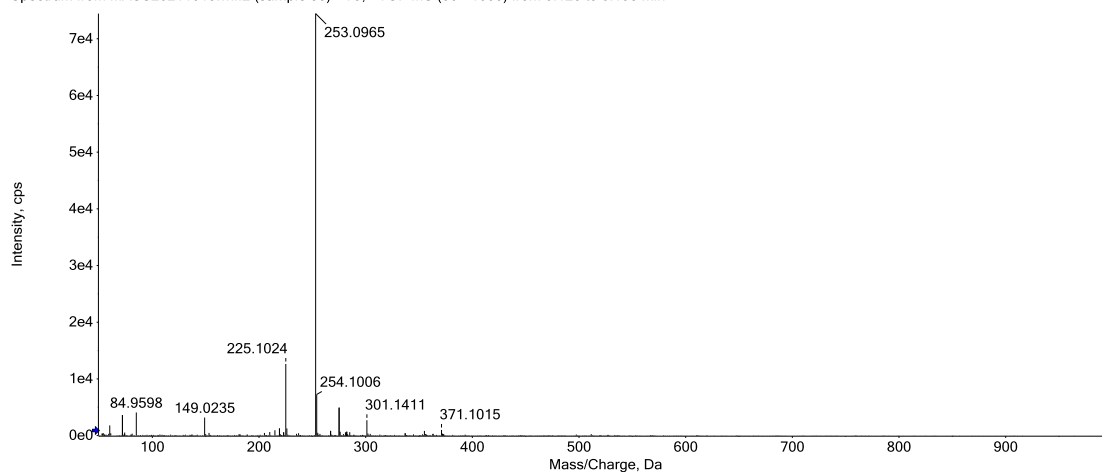

Spectrum from MASS20211013.wiff2 (sample 33) - Y9, +TOF MS (50 - 1000) from 0.123 to 0.193 min

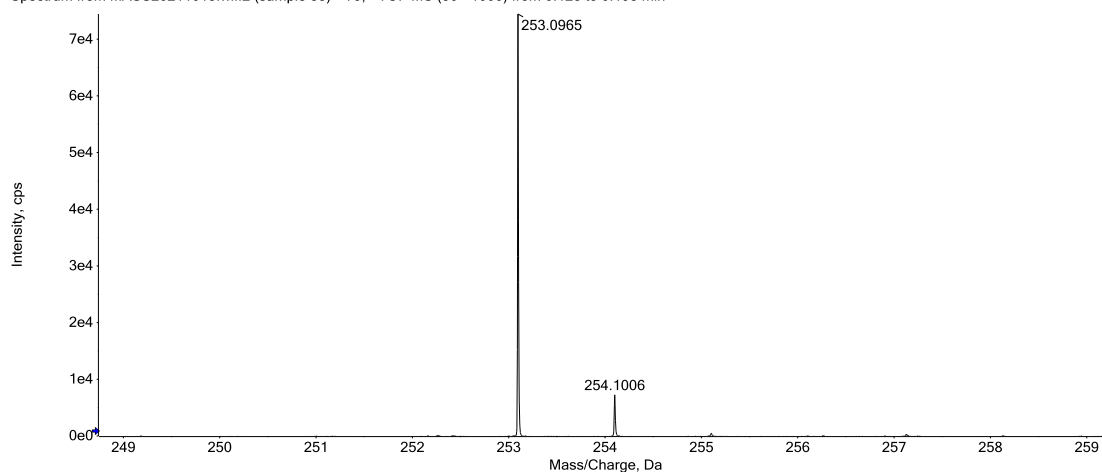

| Hit | Formula    | m/z      | RDB  | ppm  | MS Rank | MSMS ppm | MSMS Rank | Found |
|-----|------------|----------|------|------|---------|----------|-----------|-------|
| 1   | C15H12N2O2 | 253.0972 | 11.0 | -2.6 | 1       |          |           | NA/NA |

## HR-MS spectrum of S2-6

Spectrum from MASS20211013.wiff2 (sample 27) - Y3, +TOF MS (50 - 1000) from 0.264 to 0.308 min

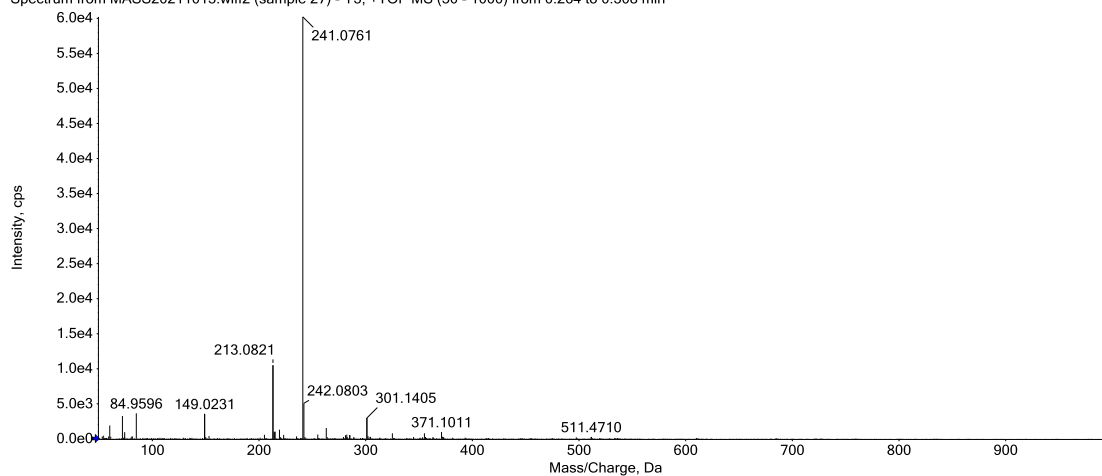



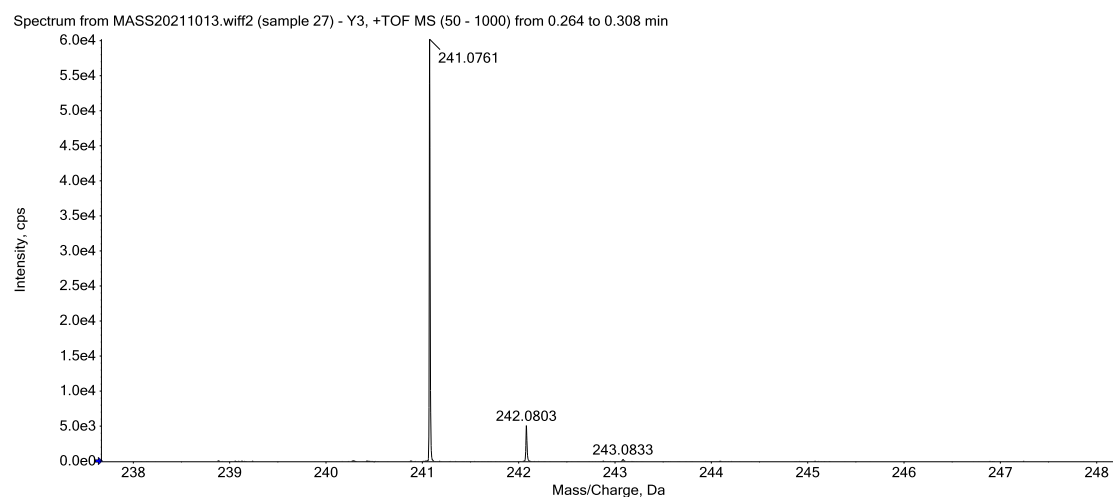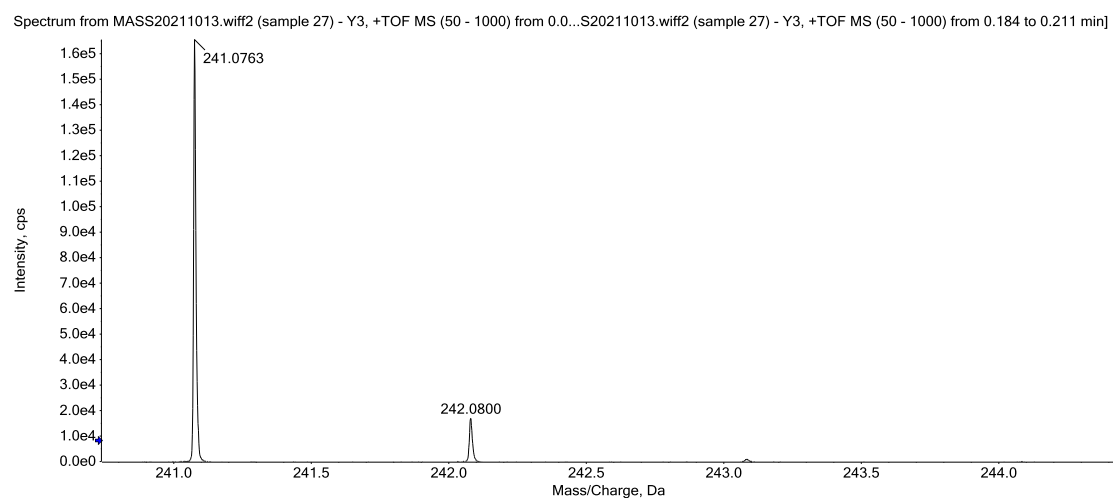

| Hit | Formula   | m/z      | RDB  | ppm  | MS Rank | MSMS ppm | MSMS Rank | Found |
|-----|-----------|----------|------|------|---------|----------|-----------|-------|
| 1   | C14H9FN2O | 241.0772 | 11.0 | -4.4 | 1       |          |           | NA/NA |

## HR-MS spectrum of S2-7

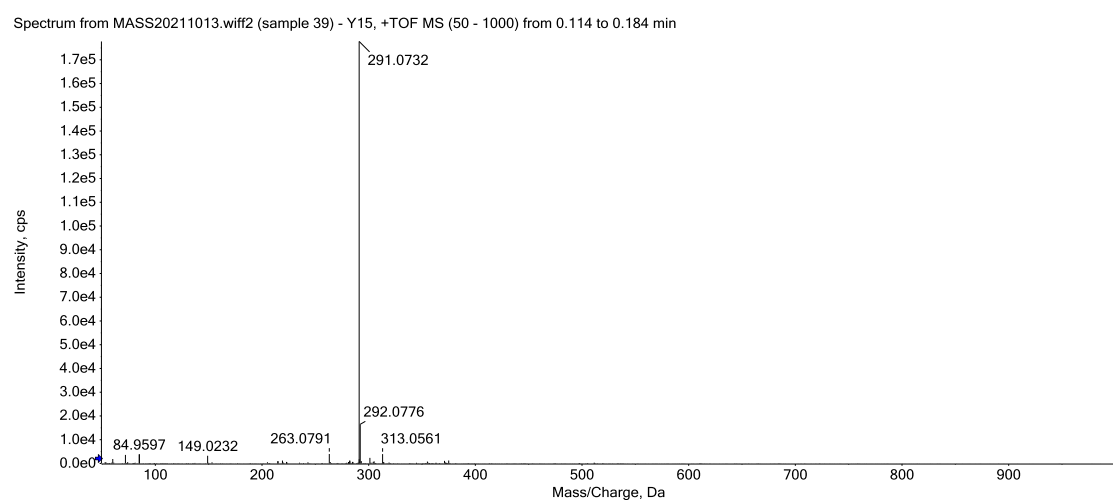

Spectrum from MASS20211013.wiff2 (sample 39) - Y15, +TOF MS (50 - 1000) from 0.114 to 0.184 min

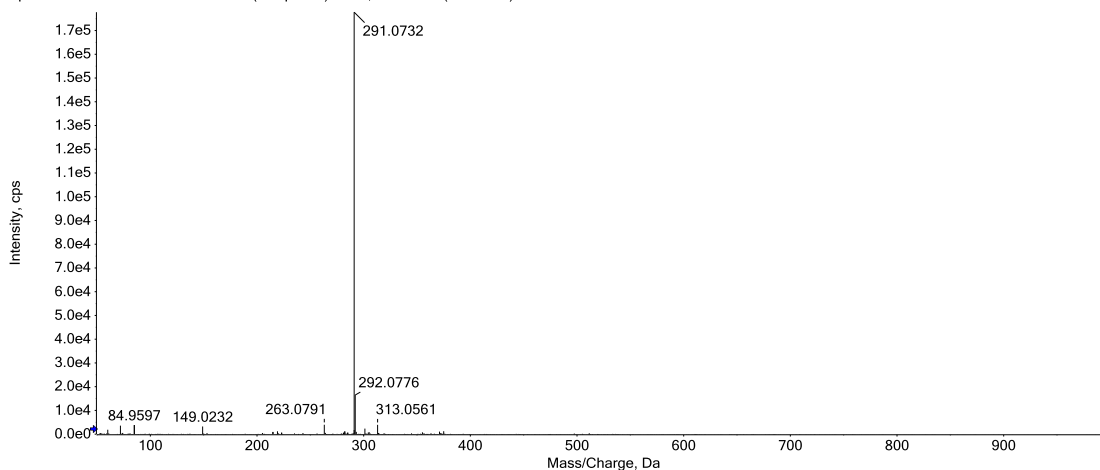

Spectrum from MASS20211013.wiff2 (sample 39) - Y15, +TOF MS (50 - 1000) from 0.114 to 0.184 min

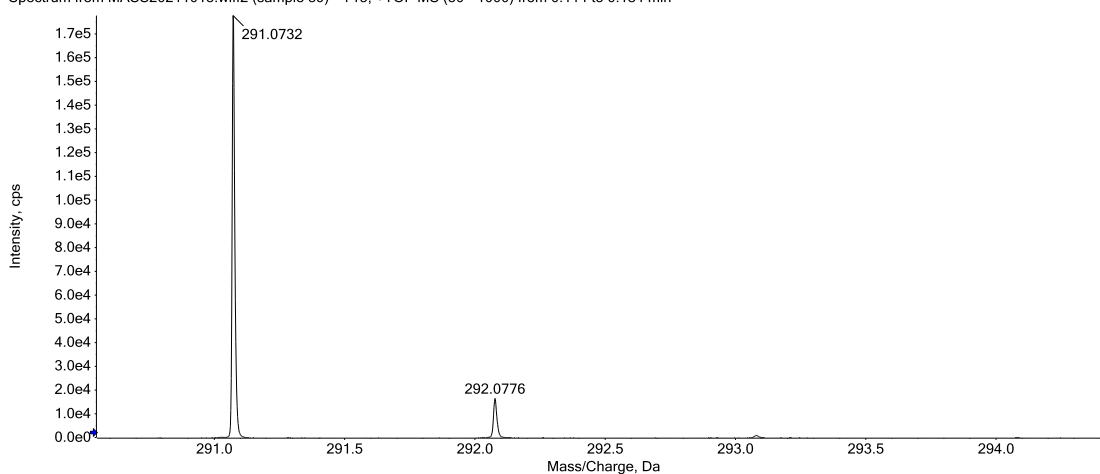

| Hit | Formula                                                        | m/z      | RDB  | ppm  | MS Rank | MSMS ppm | MSMS Rank | Found |
|-----|----------------------------------------------------------------|----------|------|------|---------|----------|-----------|-------|
| 1   | C <sub>15</sub> H <sub>9</sub> F <sub>3</sub> N <sub>2</sub> O | 291.0740 | 11.0 | -2.7 | 1       |          |           | NA/NA |

## HR-MS spectrum of S2-8

Spectrum from MASS20210609.wiff2 (sample 56) - Y9, +TOF MS (50 - 1000) from 0.132 to 0.167 min

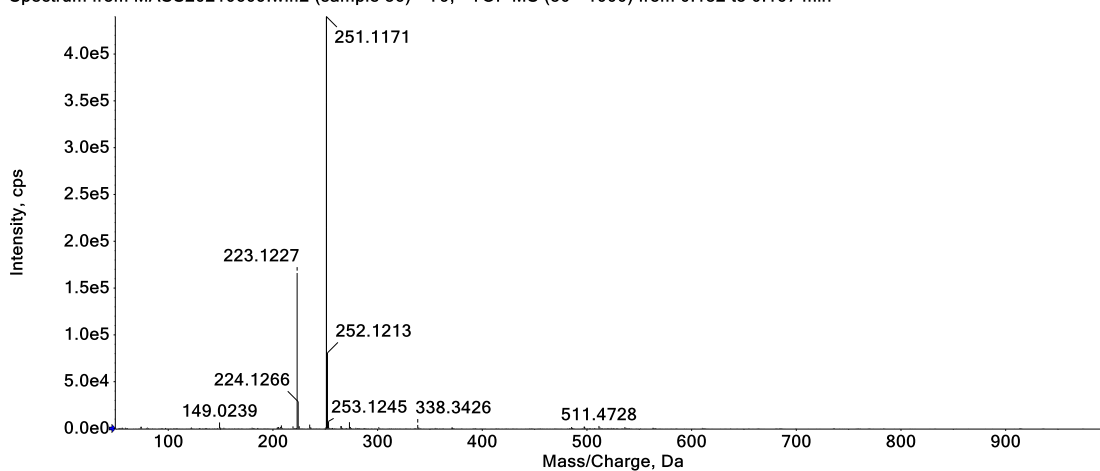

Spectrum from MASS20210609.wiff2 (sample 56) - Y9, +TOF MS (50 - 1000) from 0.132 to 0.167 min

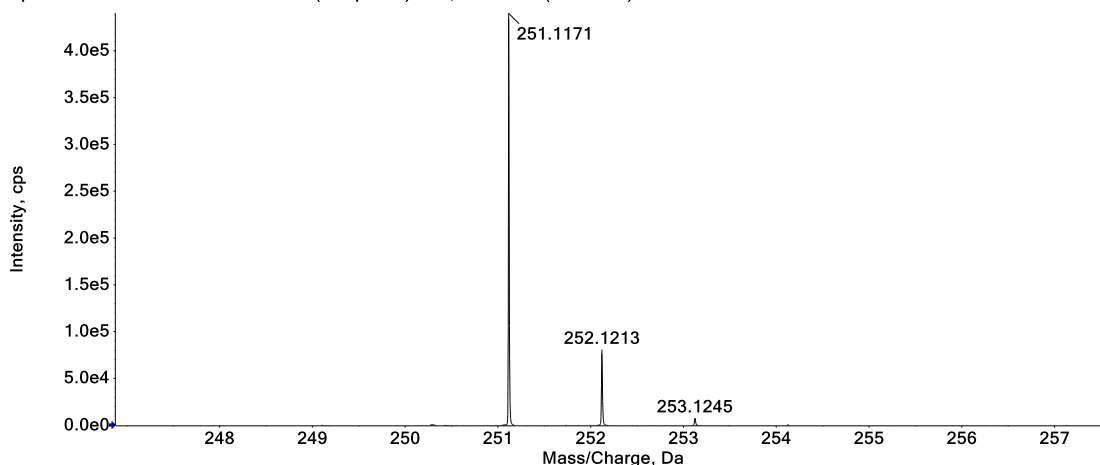

| Hit | Formula   | m/z      | RDB  | ppm  | MS Rank | MSMS ppm | MSMS Rank | Found |
|-----|-----------|----------|------|------|---------|----------|-----------|-------|
| 1   | C16H14N2O | 251.1179 | 11.0 | -3.1 | 1       |          |           | NA/NA |

## HR-MS spectrum of S2-9

Spectrum from MASS20210609.wiff2 (sample 59) - Y12, +TOF MS (50 - 1000) from 0.132 to 0.167 min

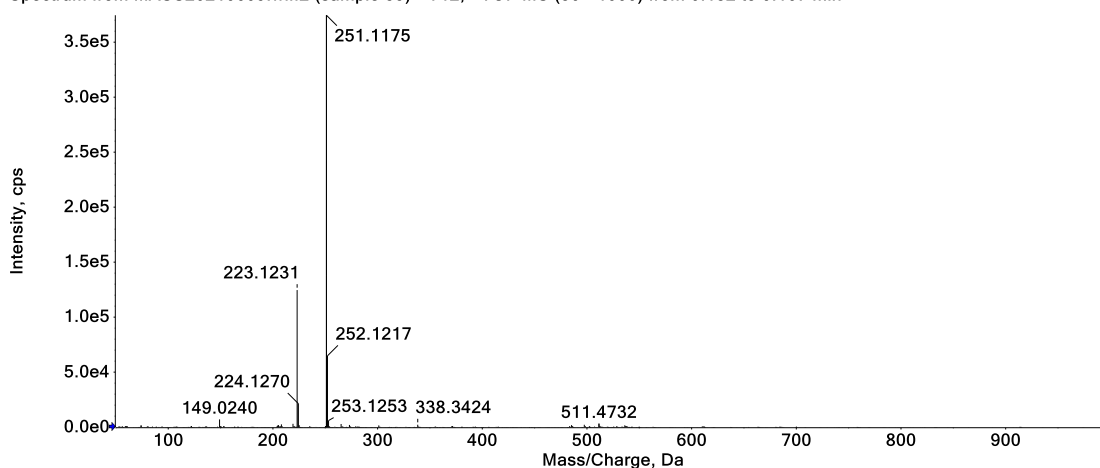

Spectrum from MASS20210609.wiff2 (sample 59) - Y12, +TOF MS (50 - 1000) from 0.132 to 0.167 min

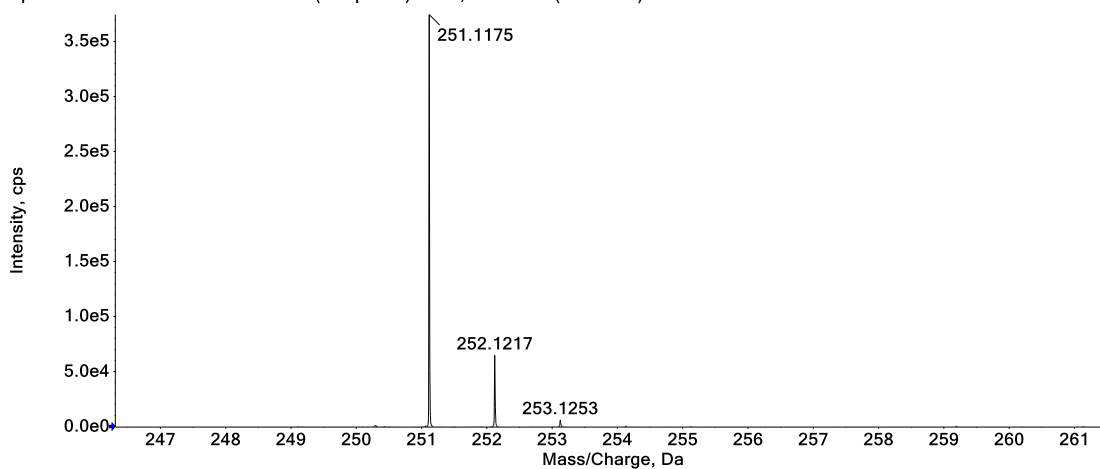

| Hit | Formula   | m/z      | RDB  | ppm  | MS Rank | MSMS ppm | MSMS Rank | Found |
|-----|-----------|----------|------|------|---------|----------|-----------|-------|
| 1   | C16H14N2O | 251.1179 | 11.0 | -1.6 | 1       |          |           | NA/NA |

## HR-MS spectrum of S2-10

Spectrum from MASS20210609.wiff2 (sample 52) - Y5, +TOF MS (50 - 1000) from 0.132 to 0.167 min

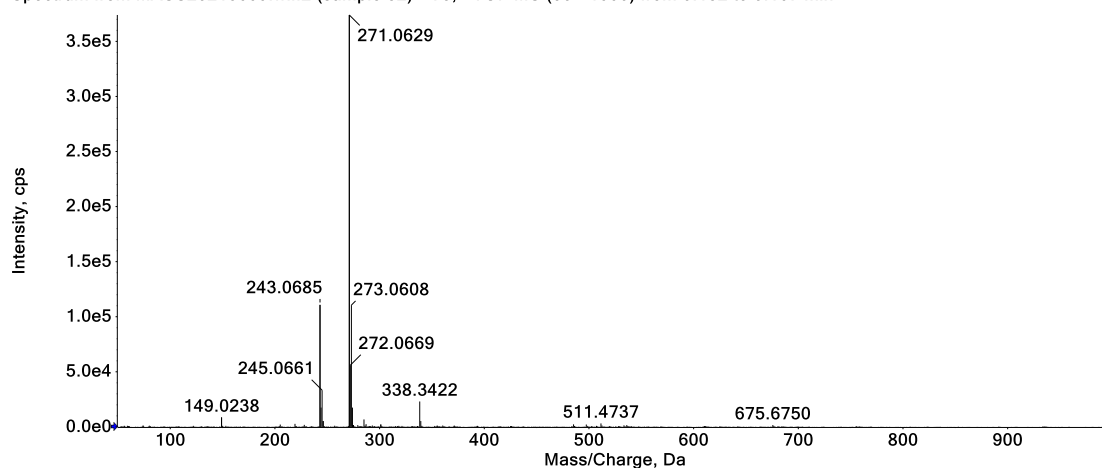

Spectrum from MASS20210609.wiff2 (sample 52) - Y5, +TOF MS (50 - 1000) from 0.132 to 0.167 min

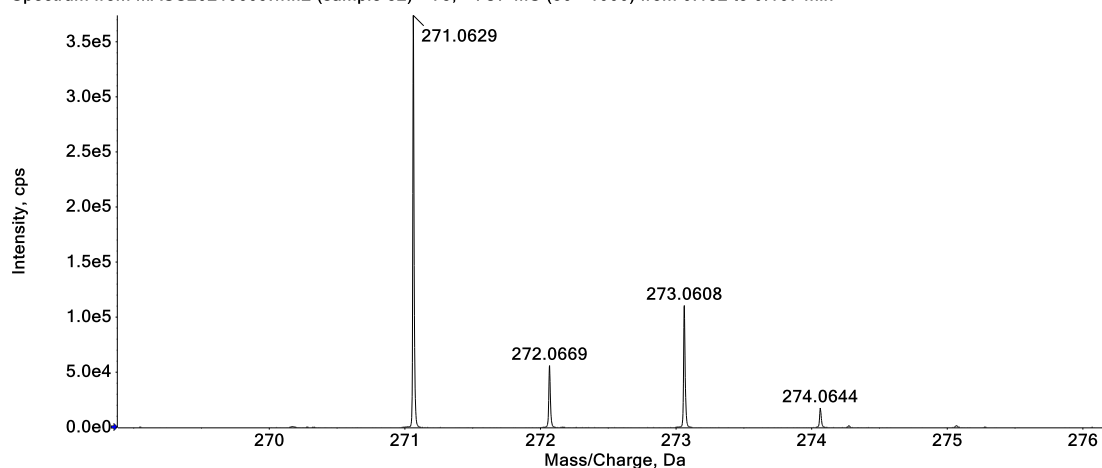

| Hit | Formula                                                         | m/z      | RDB  | ppm  | MS Rank | MSMS ppm | MSMS Rank | Found |
|-----|-----------------------------------------------------------------|----------|------|------|---------|----------|-----------|-------|
| 1   | C <sub>15</sub> H <sub>11</sub> C <sub>1</sub> N <sub>2</sub> O | 271.0633 | 11.0 | -1.4 | 1       |          |           | NA/NA |

## HR-MS spectrum of S2-11

Spectrum from MASS20210609.wiff2 (sample 67) - Y20, +TOF MS (50 - 1000) from 0.079 to 0.114 min

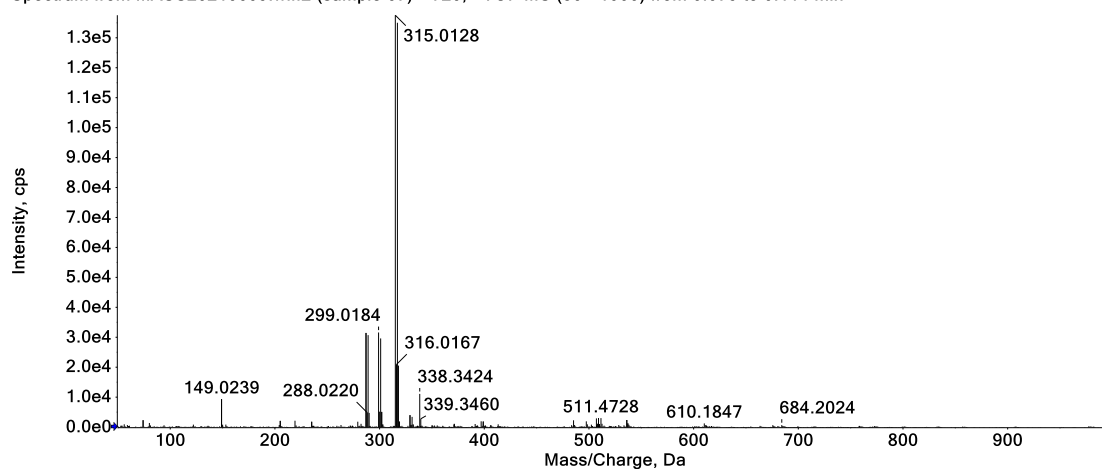

Spectrum from MASS20210609.wiff2 (sample 67) - Y20, +TOF MS (50 - 1000) from 0.079 to 0.114 min

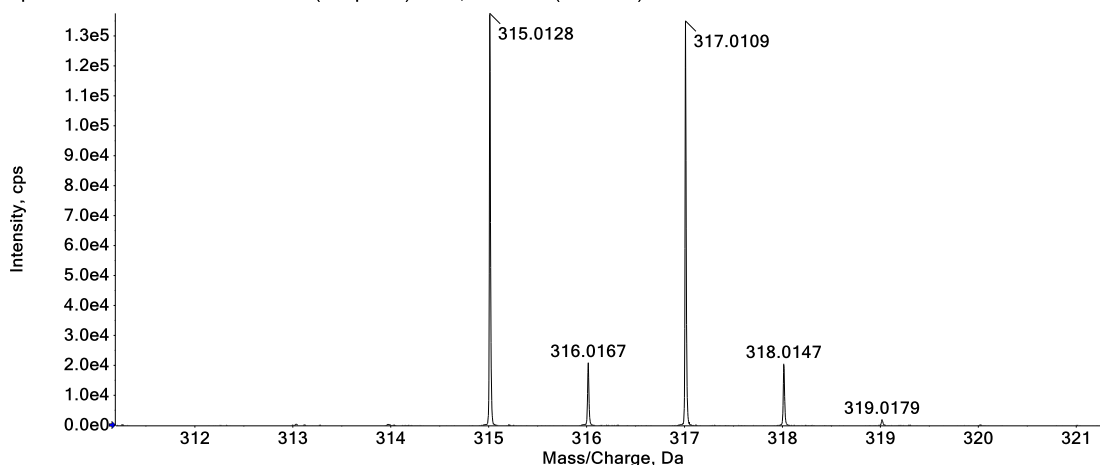

| Hit | Formula                                            | m/z      | RDB  | ppm | MS Rank | MSMS ppm | MSMS Rank | Found |
|-----|----------------------------------------------------|----------|------|-----|---------|----------|-----------|-------|
| 1   | C <sub>15</sub> H <sub>11</sub> BrN <sub>2</sub> O | 315.0128 | 11.0 | 0.2 | 1       |          |           | NA/NA |

## HR-MS spectrum of S2-12

Spectrum from MASS20210609.wiff2 (sample 71) - Y24, +TOF MS (50 - 1000) from 0.079 to 0.114 min

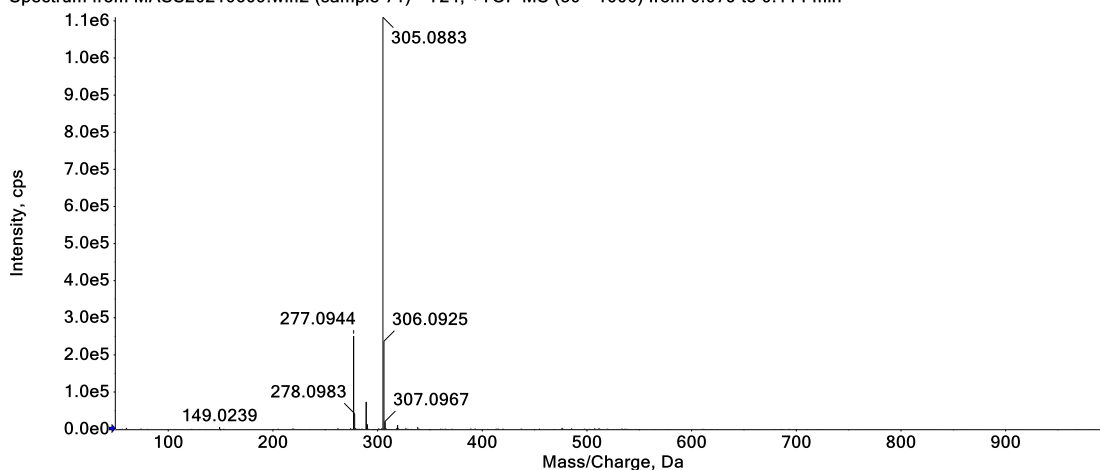

Spectrum from MASS20210609.wiff2 (sample 71) - Y24, +TOF MS (50 - 1000) from 0.079 to 0.114 min

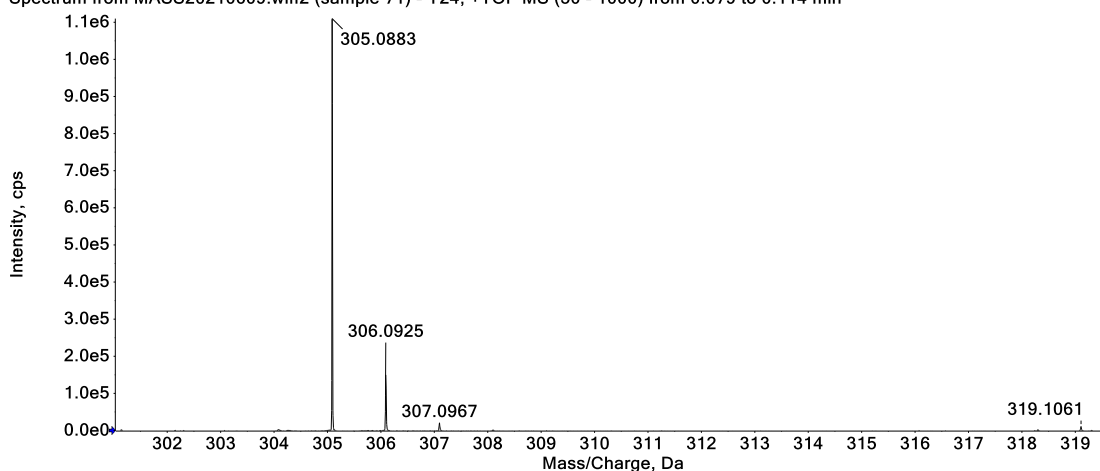

| Hit | Formula                                                         | m/z      | RDB  | ppm  | MS Rank | MSMS ppm | MSMS Rank | Found |
|-----|-----------------------------------------------------------------|----------|------|------|---------|----------|-----------|-------|
| 1   | C <sub>16</sub> H <sub>11</sub> F <sub>3</sub> N <sub>2</sub> O | 305.0896 | 11.0 | -4.3 | 1       |          |           | NA/NA |

## HR-MS spectrum of S2-13

Spectrum from MASS20210609.wiff2 (sample 62) - Y15, +TOF MS (50 - 1000) from 0.132 to 0.167 min

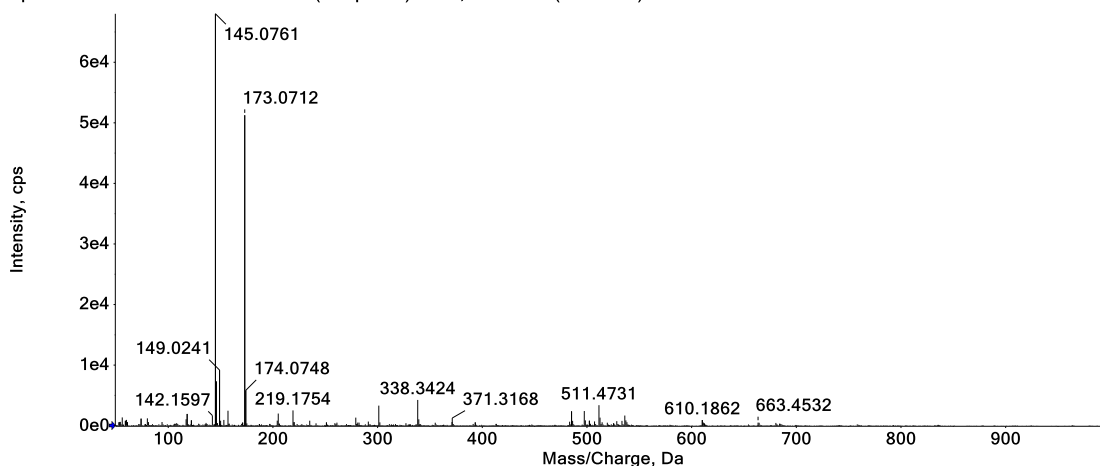

Spectrum from MASS20210609.wiff2 (sample 62) - Y15, +TOF MS (50 - 1000) from 0.132 to 0.167 min

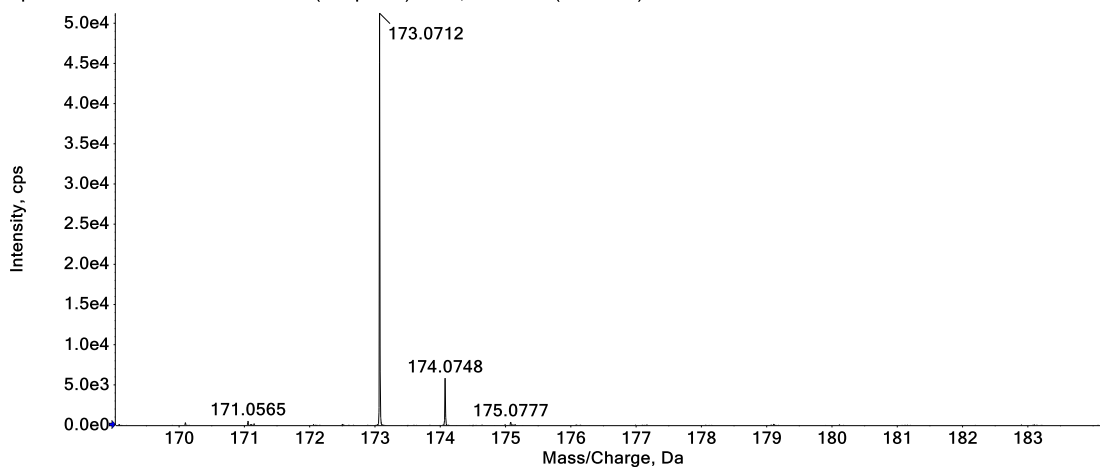

| Hit | Formula  | m/z      | RDB | ppm | MS Rank | MSMS ppm | MSMS Rank | Found |
|-----|----------|----------|-----|-----|---------|----------|-----------|-------|
| 1   | C10H8N2O | 173.0709 | 8.0 | 1.5 | 1       |          |           | NA/NA |

## HR-MS spectrum of S3-1

Spectrum from MASS20210609.wiff2 (sample 82) - Y35, +TOF MS (50 - 1000) from 0.140 to 0.176 min

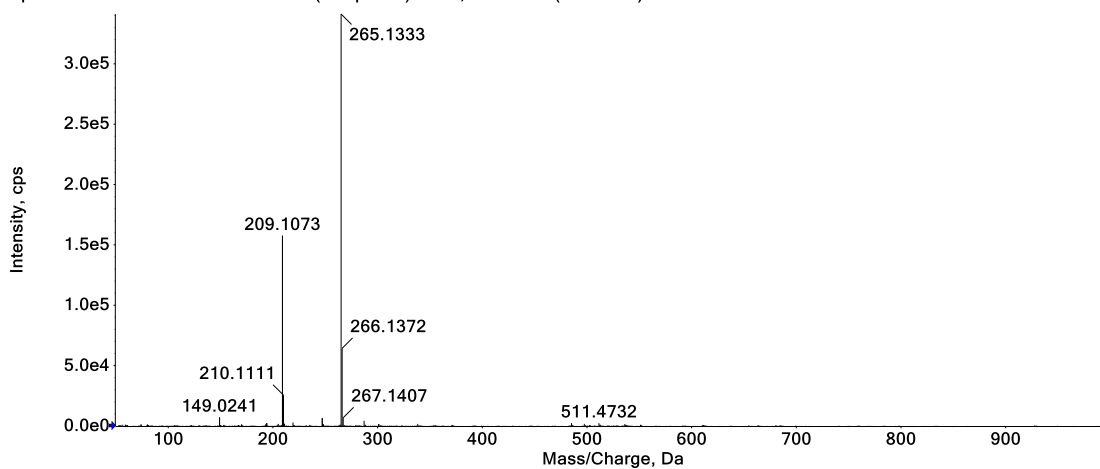

Spectrum from MASS20210609.wiff2 (sample 82) - Y35, +TOF MS (50 - 1000) from 0.140 to 0.176 min

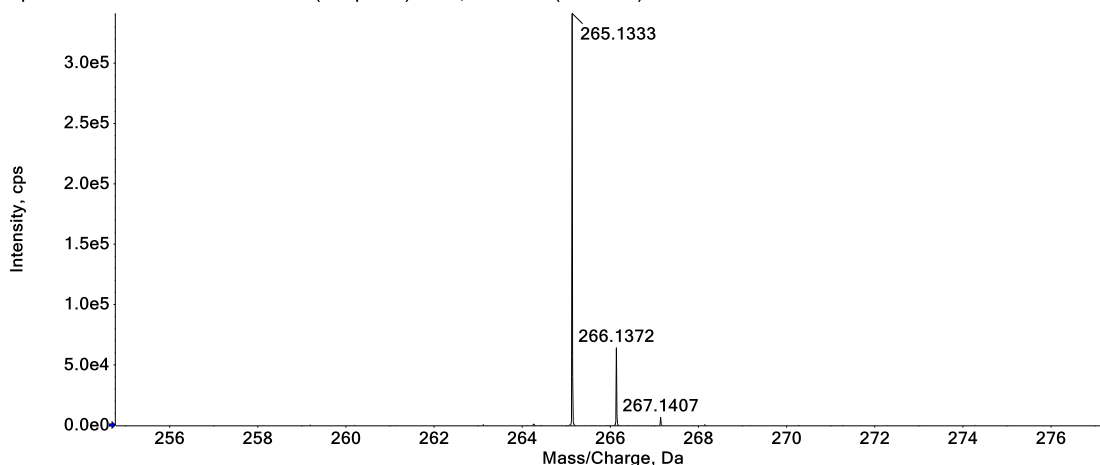

| Hit | Formula   | m/z      | RDB  | ppm  | MS Rank | MSMS ppm | MSMS Rank | Found |
|-----|-----------|----------|------|------|---------|----------|-----------|-------|
| 1   | C17H16N2O | 265.1335 | 11.0 | -0.9 | 1       |          |           | NA/NA |

## HR-MS spectrum of S3-2

Spectrum from MASS20210609.wiff2 (sample 85) - Y38, +TOF MS (50 - 1000) from 0.140 to 0.176 min

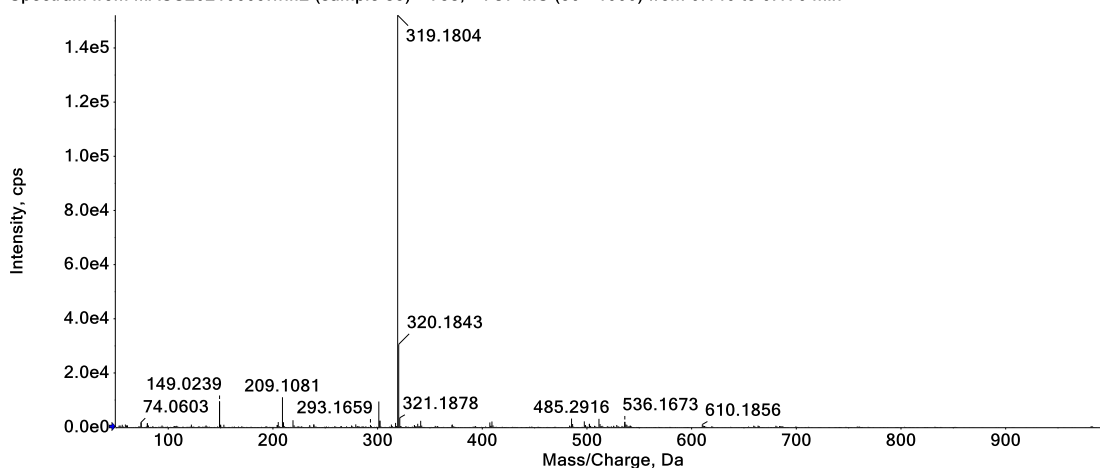

Spectrum from MASS20210609.wiff2 (sample 85) - Y38, +TOF MS (50 - 1000) from 0.140 to 0.176 min

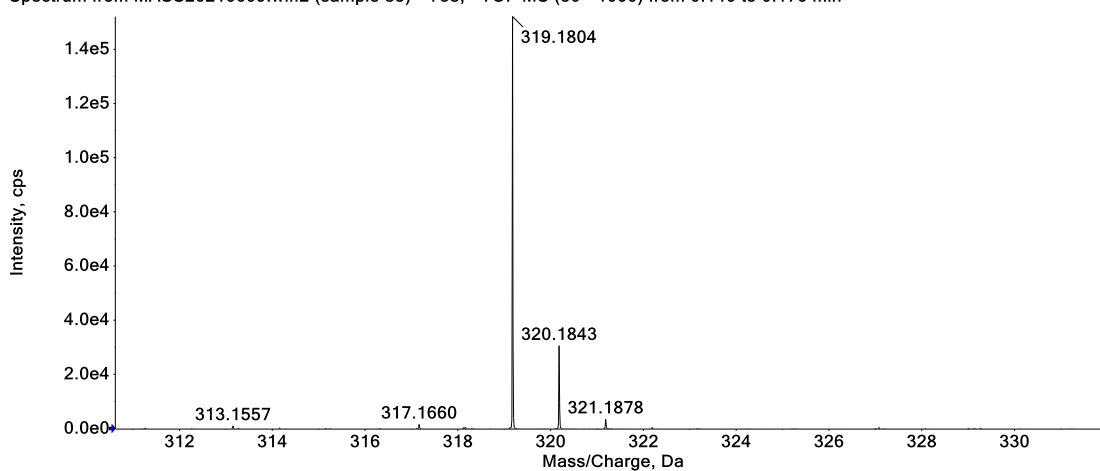

| Hit | Formula   | m/z      | RDB  | ppm  | MS Rank | MSMS ppm | MSMS Rank | Found |
|-----|-----------|----------|------|------|---------|----------|-----------|-------|
| 1   | C21H22N2O | 319.1805 | 12.0 | -0.3 | 1       |          |           | NA/NA |

## HR-MS spectrum of S3-3

Spectrum from MASS20210609.wiff2 (sample 88) - Y41, +TOF MS (50 - 1000) from 0.140 to 0.176 min

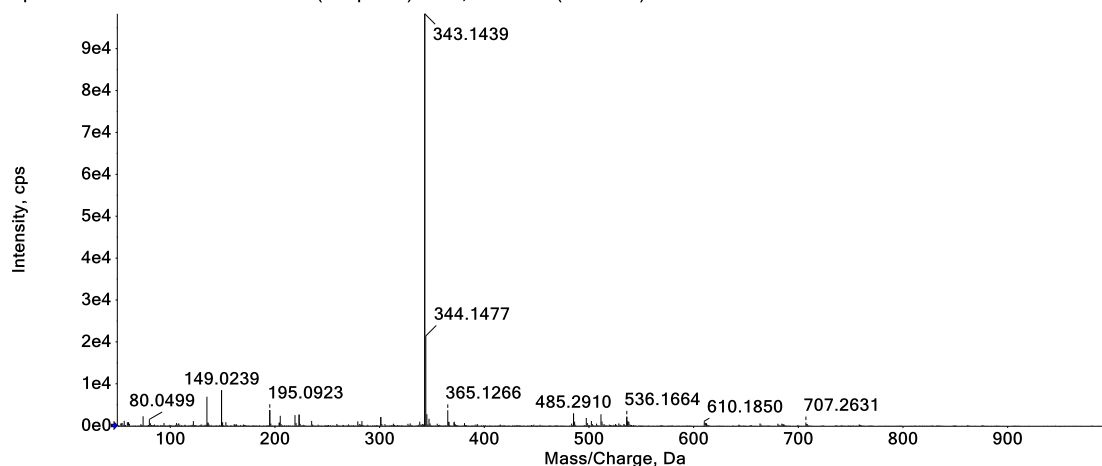

Spectrum from MASS20210609.wiff2 (sample 88) - Y41, +TOF MS (50 - 1000) from 0.140 to 0.176 min

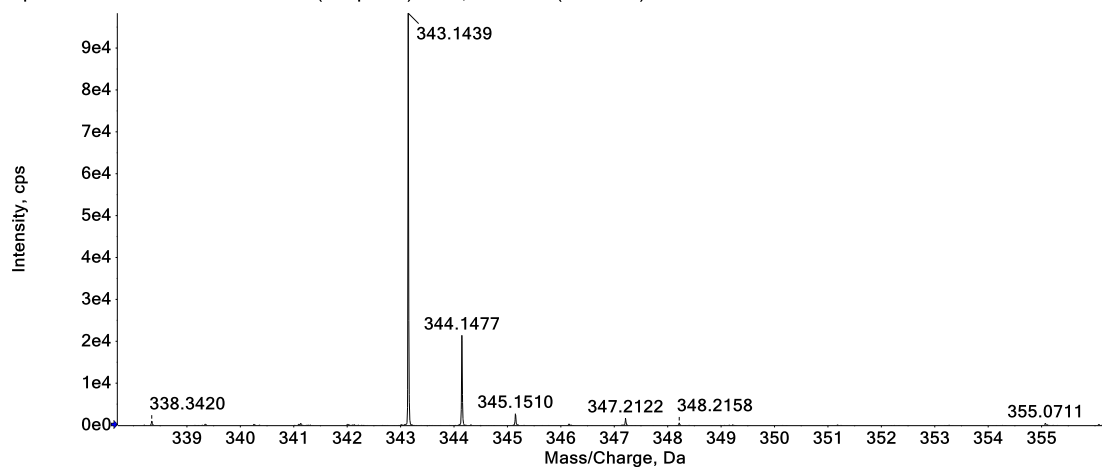

| Hit | Formula    | m/z      | RDB  | ppm  | MS Rank | MSMS ppm | MSMS Rank | Found |
|-----|------------|----------|------|------|---------|----------|-----------|-------|
| 1   | C22H18N2O2 | 343.1441 | 15.0 | -0.6 | 1       |          |           | NA/NA |

## HR-MS spectrum of S3-4

Spectrum from MASS20210609.wiff2 (sample 91) - Y44, +TOF MS (50 - 1000) from 0.140 to 0.176 min

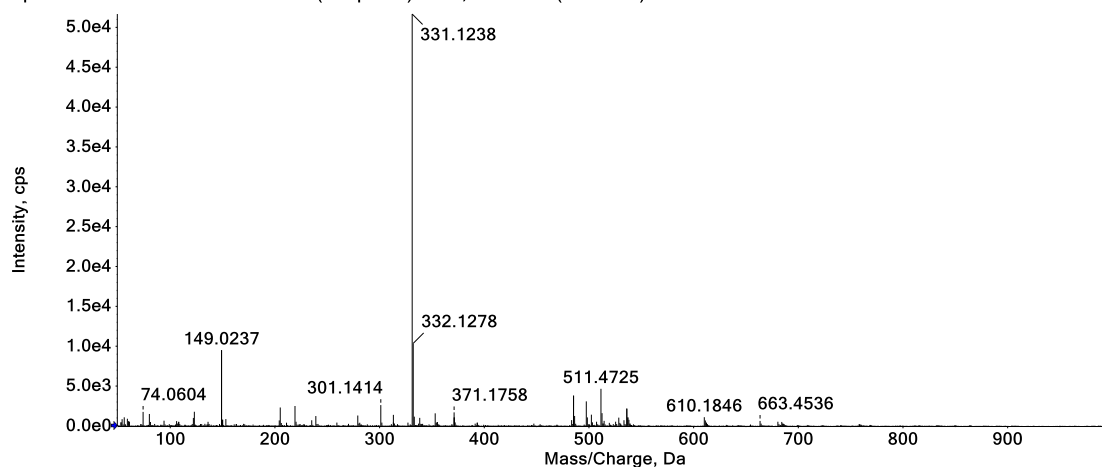



Spectrum from MASS20210609.wiff2 (sample 91) - Y44, +TOF MS (50 - 1000) from 0.140 to 0.176 min

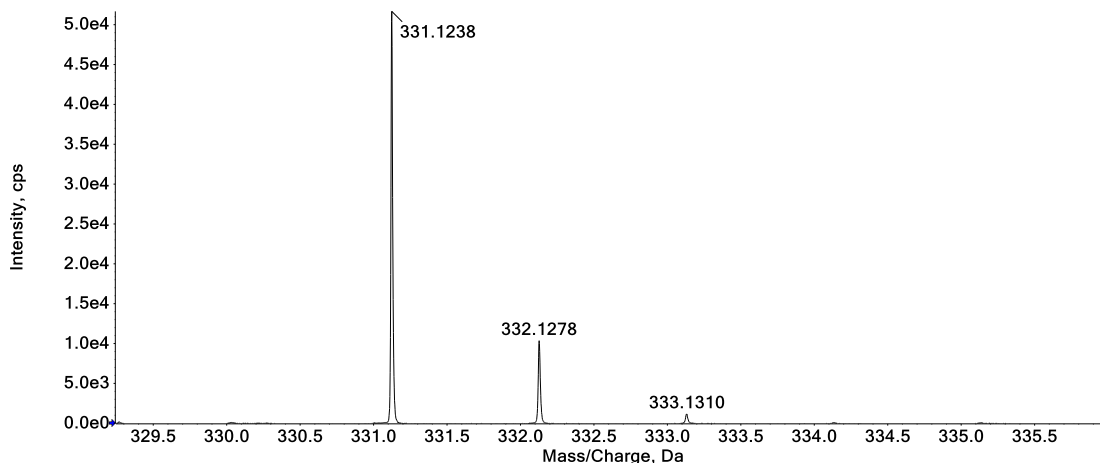

| Hit | Formula    | m/z      | RDB  | ppm  | MS Rank | MSMS ppm | MSMS Rank | Found |
|-----|------------|----------|------|------|---------|----------|-----------|-------|
| 1   | C21H15FN2O | 331.1241 | 15.0 | -1.0 | 1       |          |           | NA/NA |

## HR-MS spectrum of S3-5

Spectrum from MASS20220928.wiff2 (sample 2) - Y1, Experiment 1, +IDA T... - Y1, Experiment 1, +IDA TOF MS (50 - 1000) from 0.138 to 0.230 min]

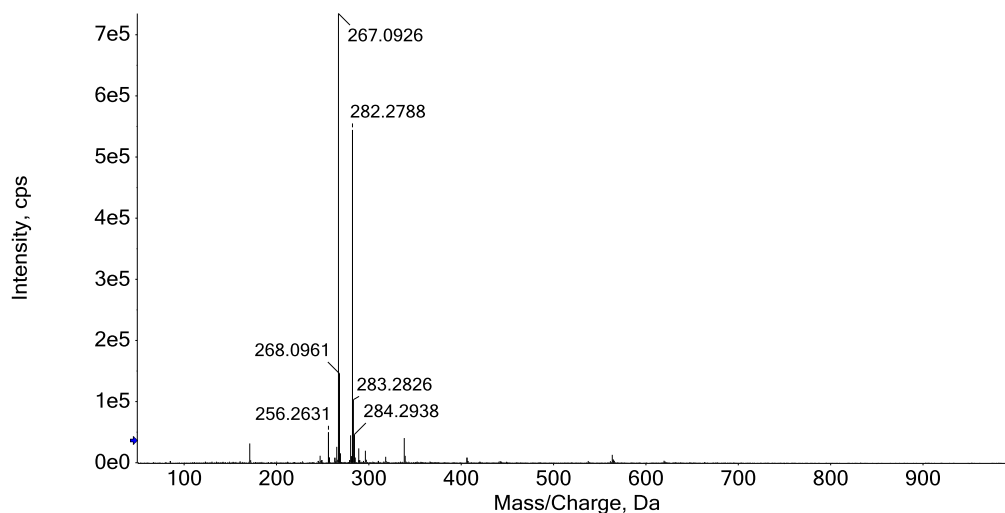

Spectrum from MASS20220928.wiff2 (sample 2) - Y1, Experiment 1, +IDA T... - Y1, Experiment 1, +IDA TOF MS (50 - 1000) from 0.138 to 0.230 min]

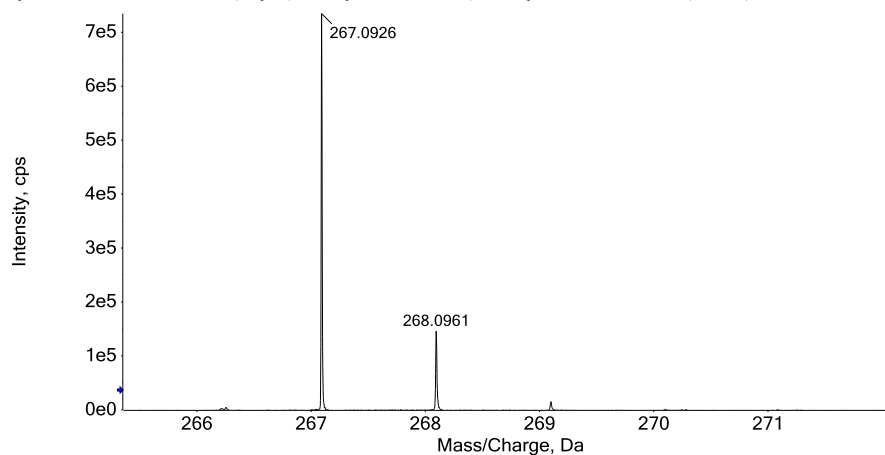

| Hit | Formula    | m/z      | RDB  | ppm  | MS Rank | MSMS ppm | MSMS Rank | Found |
|-----|------------|----------|------|------|---------|----------|-----------|-------|
| 1   | C16H11FN2O | 267.0928 | 12.0 | -0.8 | 1       |          |           | NA/NA |

## HR-MS spectrum of S4-2

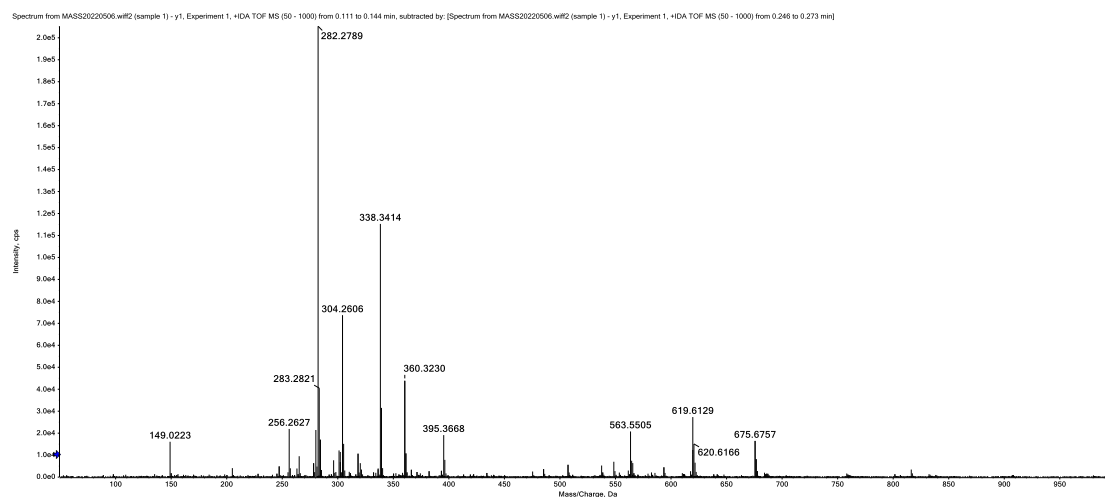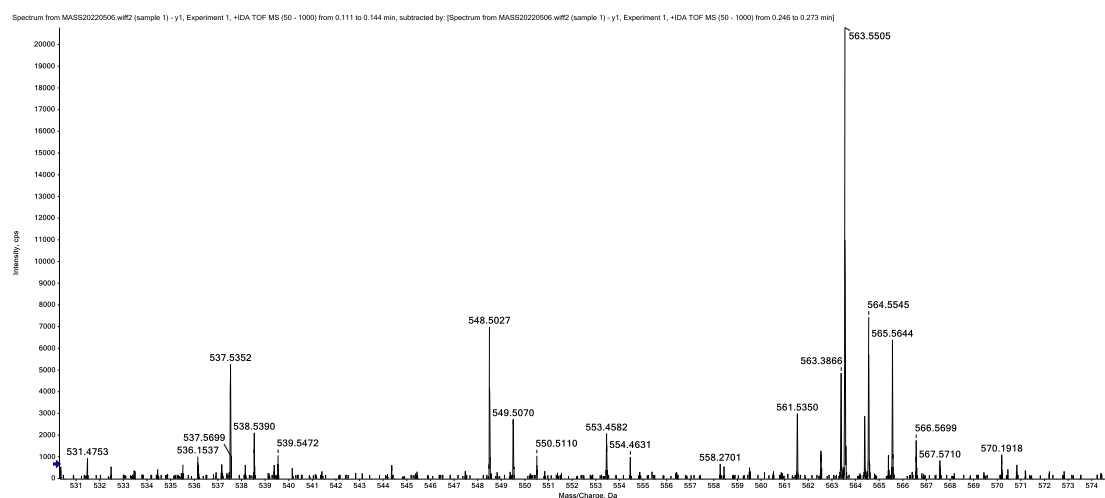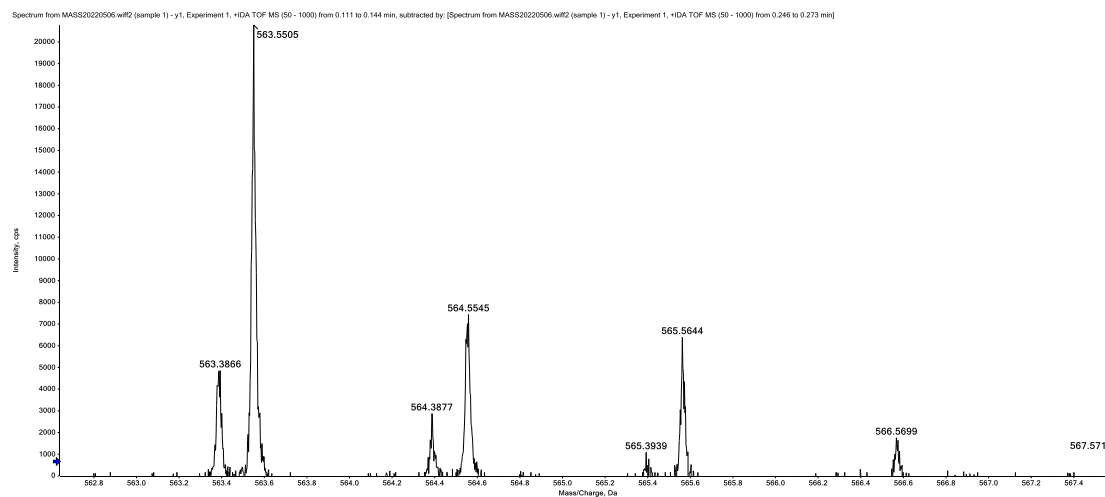

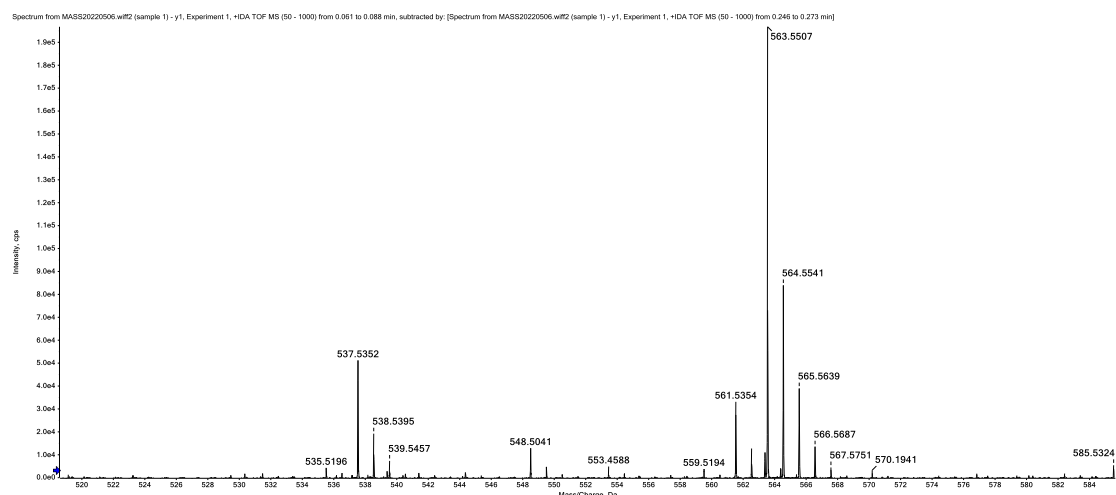

| Hit | Formula  | m/z      | RDB  | ppm | MS Rank | MSMS ppm | MSMS Rank | Found |
|-----|----------|----------|------|-----|---------|----------|-----------|-------|
| 1   | C38H52O2 | 563.3860 | 13.0 | 2.2 | 1       |          |           | NA/NA |

## HR-MS spectrum of 1a

Spectrum from MASS20210609.wiff2 (sample 48) - Y1, +TOF MS (50 - 1000) from 0.132 to 0.167 min

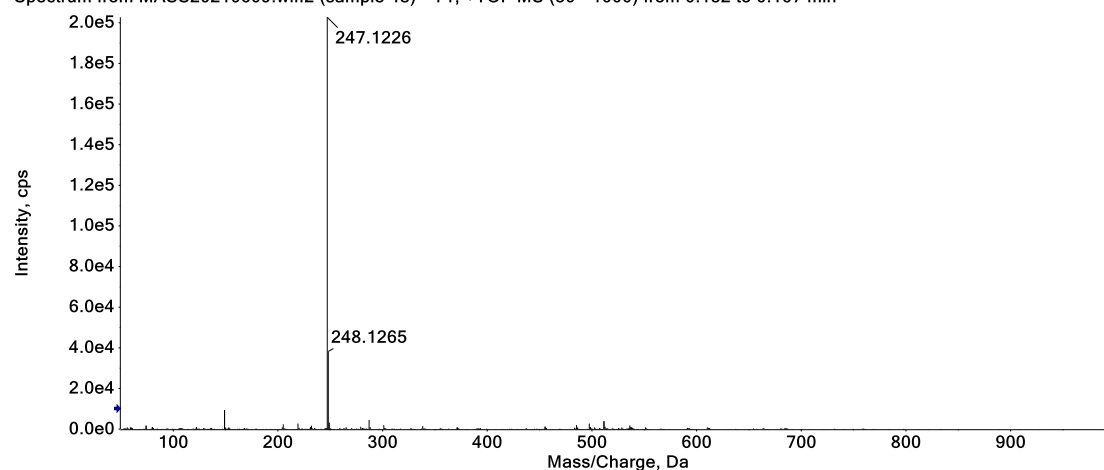

Spectrum from MASS20210609.wiff2 (sample 48) - Y1, +TOF MS (50 - 1000) from 0.132 to 0.167 min

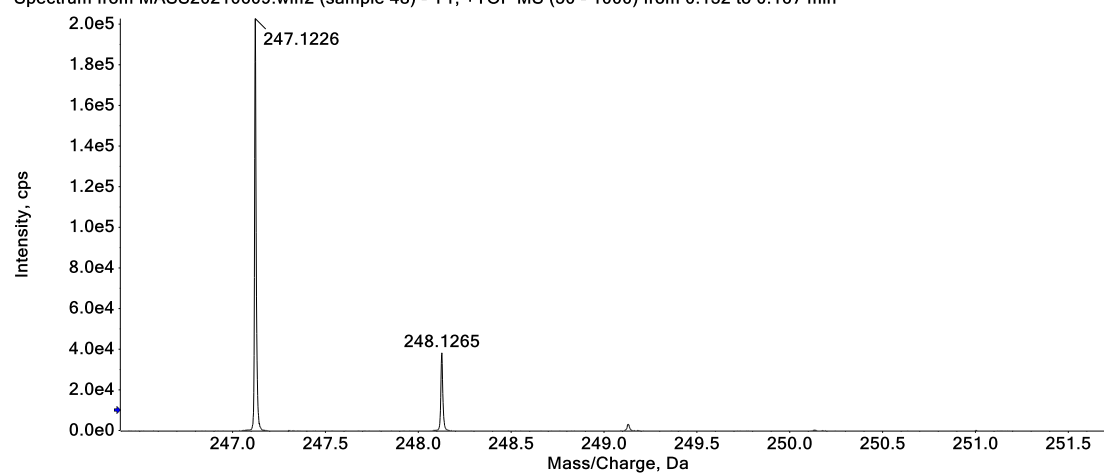

| Hit | Formula  | m/z      | RDB  | ppm  | MS Rank | MSMS ppm | MSMS Rank | Found |
|-----|----------|----------|------|------|---------|----------|-----------|-------|
| 1   | C17H14N2 | 247.1230 | 12.0 | -1.5 | 1       |          |           | NA/NA |

## HR-MS spectrum of 1b

Spectrum from MASS20210609.wiff2 (sample 75) - Y28, +TOF MS (50 - 1000) from 0.079 to 0.114 min

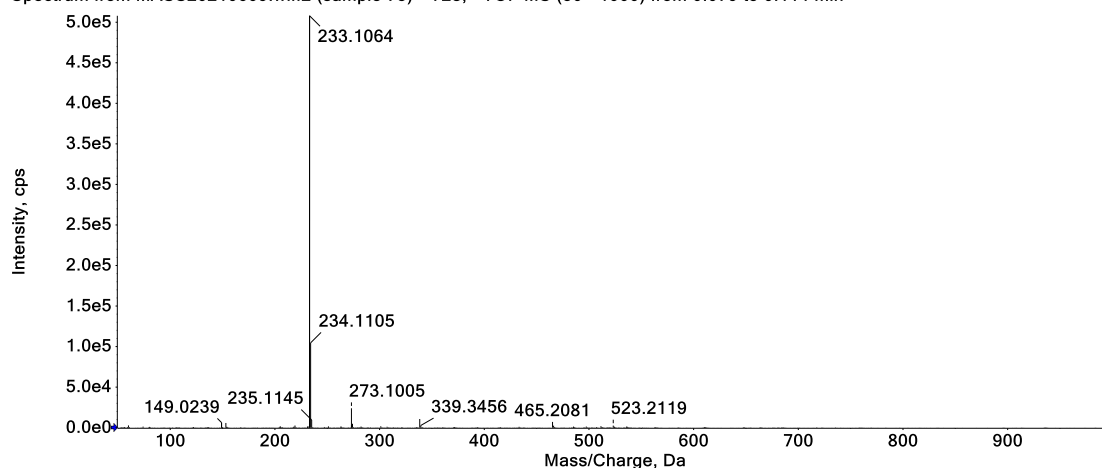

Spectrum from MASS20210609.wiff2 (sample 75) - Y28, +TOF MS (50 - 1000) from 0.079 to 0.114 min

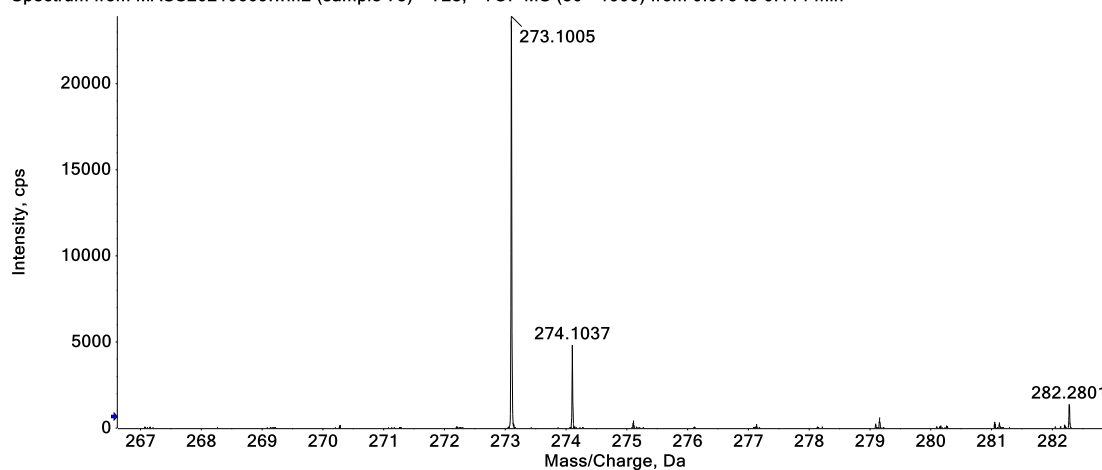

| Hit | Formula   | m/z       | RDB   | ppm  | MS Rank | MSMS ppm | MSMS Rank | Found |
|-----|-----------|-----------|-------|------|---------|----------|-----------|-------|
| 1   | C16H14N2O | 273. 0998 | 11. 0 | 2. 4 | 1       |          |           | NA/NA |

## HR-MS spectrum of 1c

Spectrum from MASS20210609.wiff2 (sample 50) - Y3, +TOF MS (50 - 1000) from 0.132 to 0.167 min

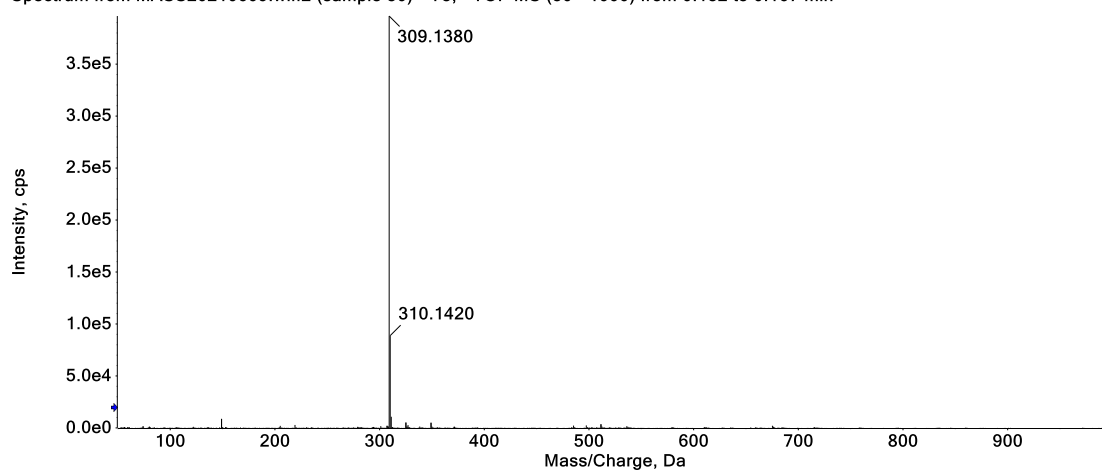

Spectrum from MASS20210609.wiff2 (sample 50) - Y3, +TOF MS (50 - 1000) from 0.132 to 0.167 min

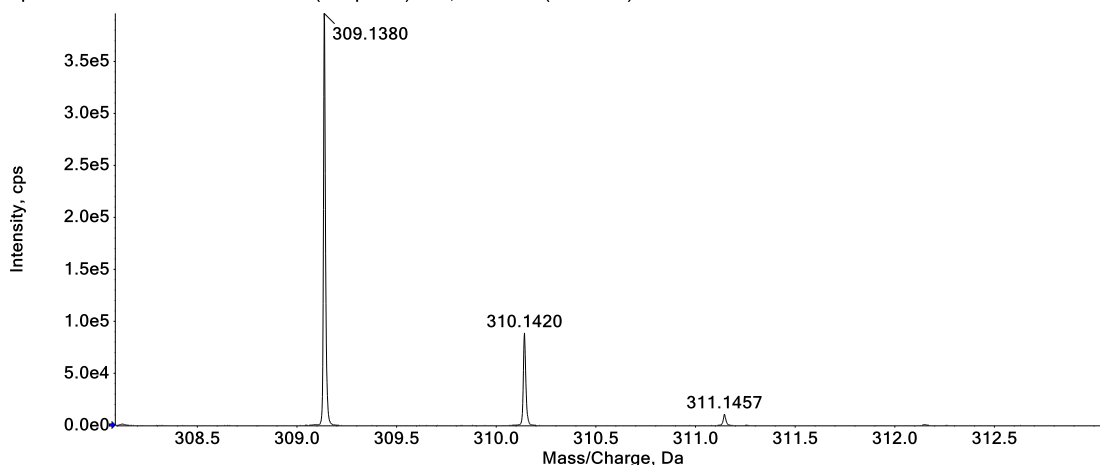

| Hit | Formula  | m/z      | RDB  | ppm  | MS Rank | MSMS ppm | MSMS Rank | Found |
|-----|----------|----------|------|------|---------|----------|-----------|-------|
| 1   | C22H16N2 | 309.1386 | 16.0 | -2.0 | 1       |          |           | NA/NA |

## HR-MS spectrum of 1d

Spectrum from MASS202100707.wiff2 (sample 3) - Y3, +TOF MS (50 - 1000) from 0.158 to 0.193 min

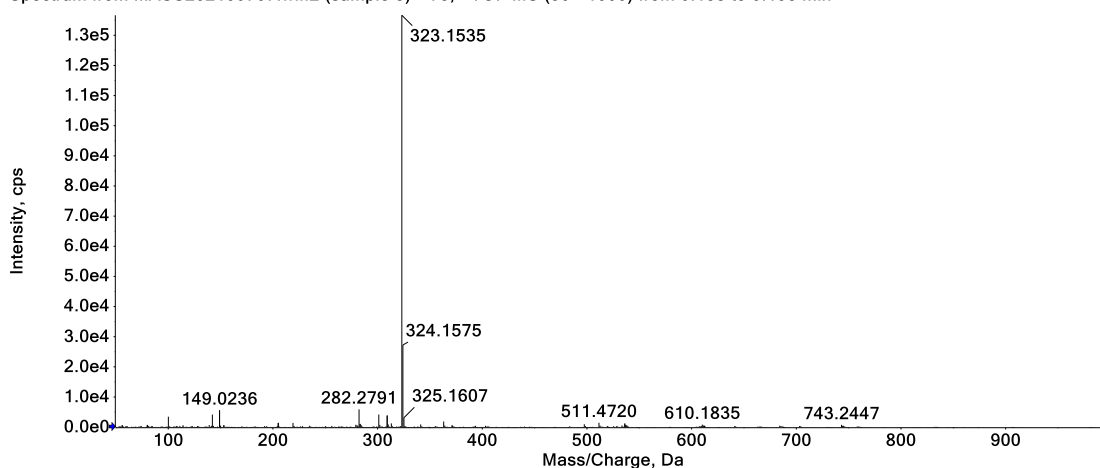

Spectrum from MASS202100707.wiff2 (sample 3) - Y3, +TOF MS (50 - 1000) from 0.158 to 0.193 min

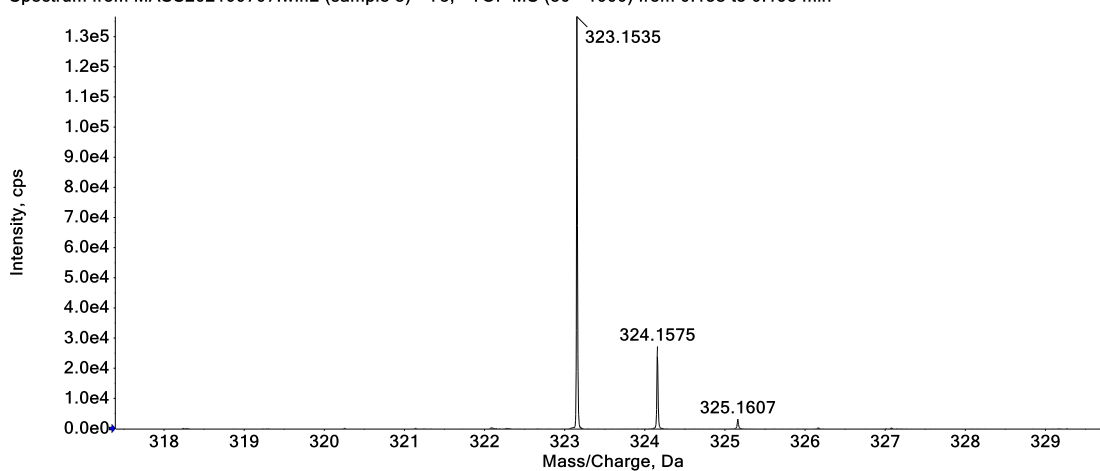

| Hit | Formula  | m/z      | RDB  | ppm  | MS Rank | MSMS ppm | MSMS Rank | Found |
|-----|----------|----------|------|------|---------|----------|-----------|-------|
| 1   | C23H18N2 | 323.1543 | 16.0 | -2.4 | 1       |          |           | NA/NA |

## HR-MS spectrum of 1e

Spectrum from MASS20210609.wiff2 (sample 76) - Y29, +TOF MS (50 - 1000) from 0.079 to 0.114 min

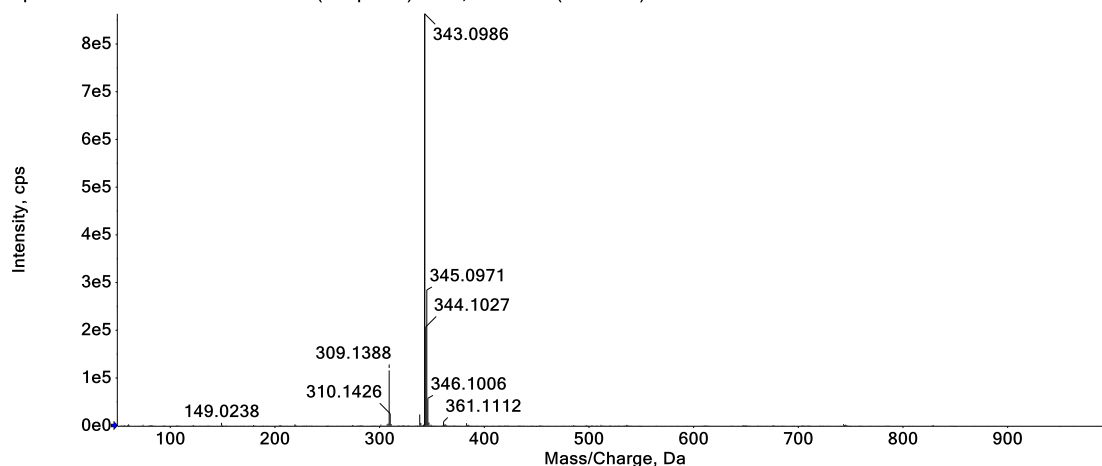

Spectrum from MASS20210609.wiff2 (sample 76) - Y29, +TOF MS (50 - 1000) from 0.079 to 0.114 min

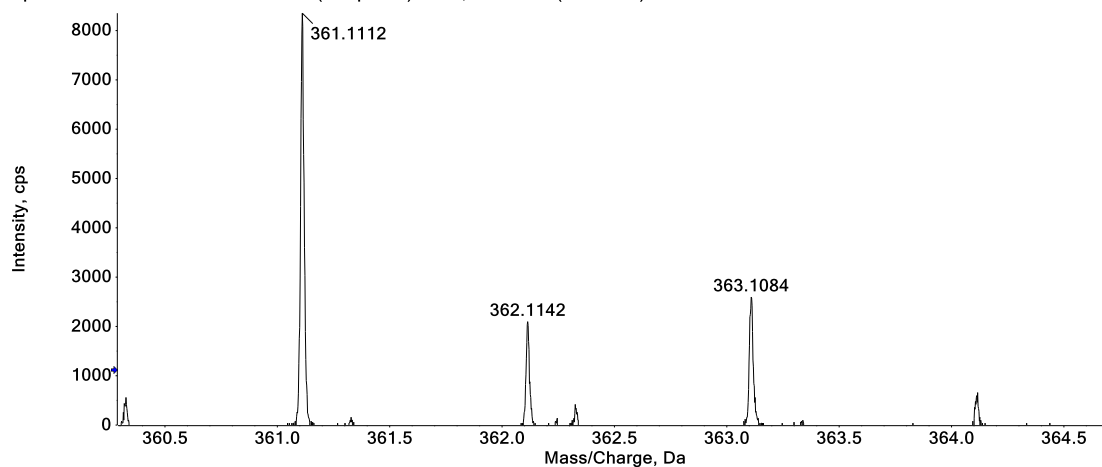

| Hit | Formula     | m/z      | RDB  | ppm | MS Rank | MSMS ppm | MSMS Rank | Found |
|-----|-------------|----------|------|-----|---------|----------|-----------|-------|
| 1   | C22H17C1N2O | 361.1102 | 15.0 | 2.7 | 1       |          |           | NA/NA |

## HR-MS spectrum of 1f

Spectrum from MASS20211013.wiff2 (sample 31) - Y7, +TOF MS (50 - 1000) from 0.123 to 0.193 min

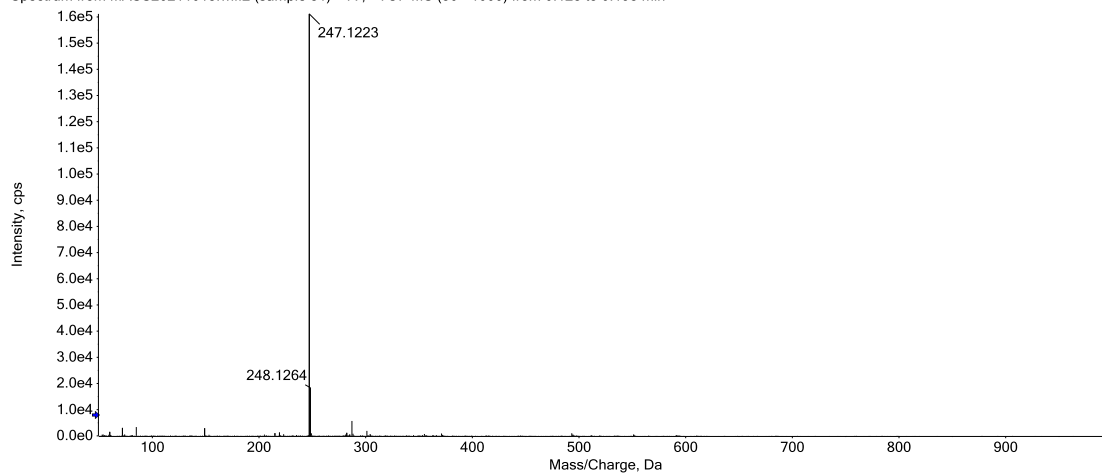

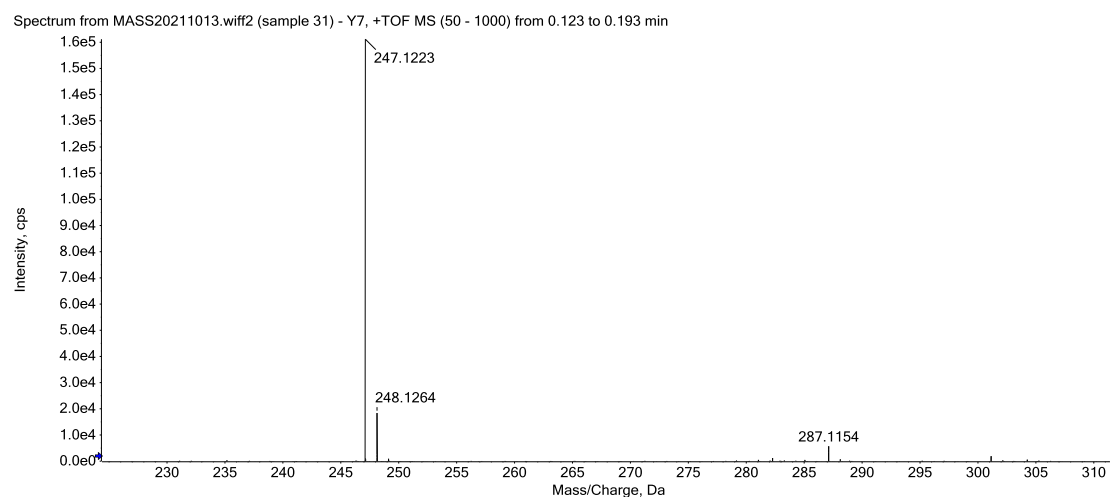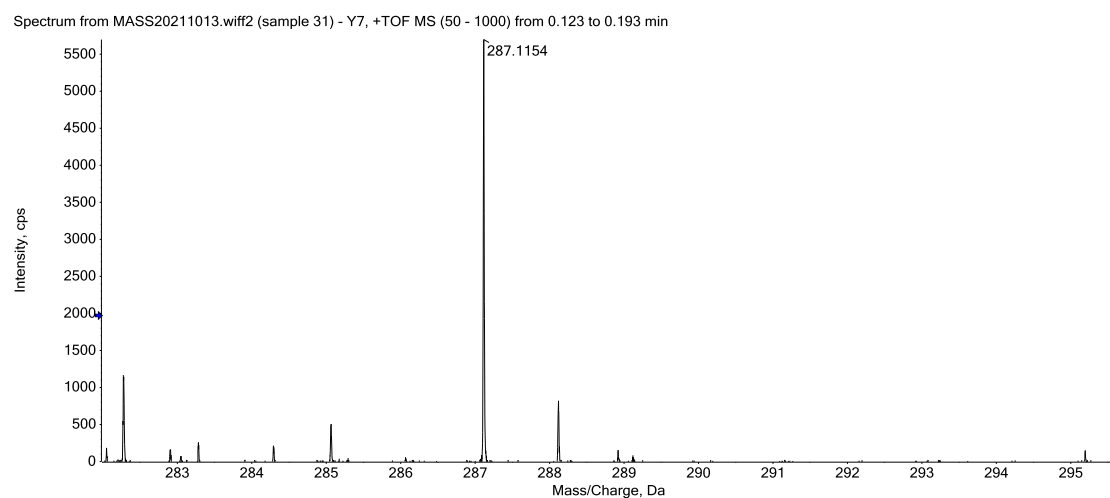

| Hit | Formula   | m/z      | RDB  | ppm  | MS Rank | MSMS ppm | MSMS Rank | Found |
|-----|-----------|----------|------|------|---------|----------|-----------|-------|
| 1   | C17H16N2O | 287.1155 | 11.0 | -0.3 | 1       |          |           | NA/NA |

## HR-MS spectrum of 1g

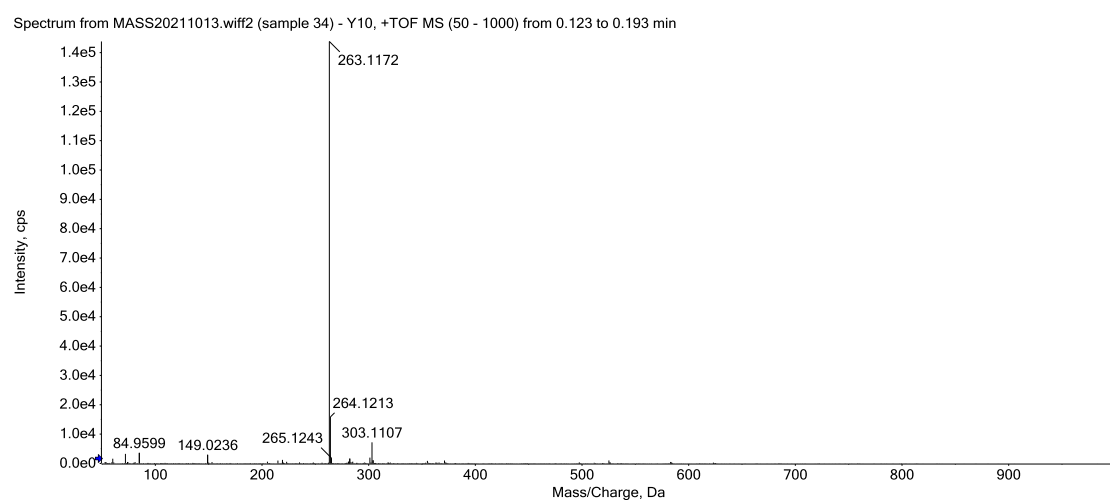

Spectrum from MASS20211013.wiff2 (sample 34) - Y10, +TOF MS (50 - 1000) from 0.123 to 0.193 min

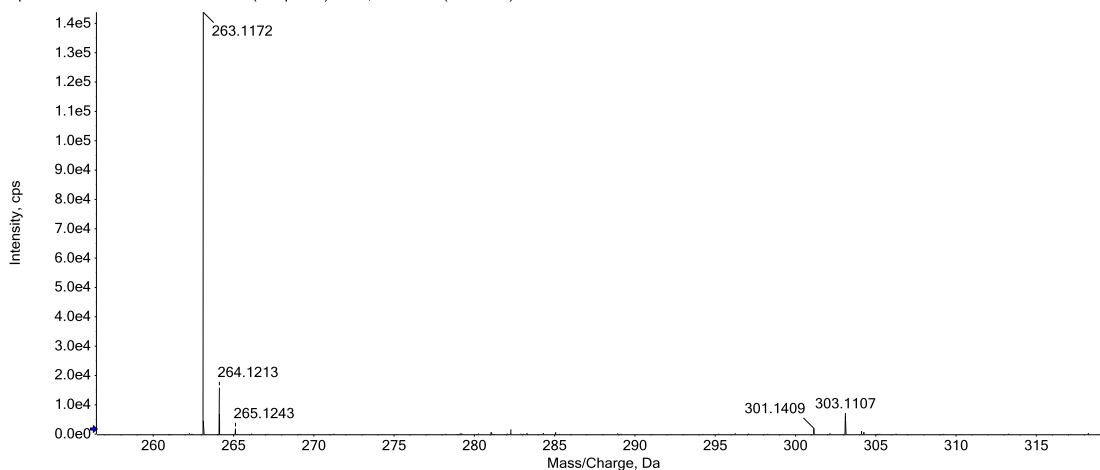

Spectrum from MASS20211013.wiff2 (sample 34) - Y10, +TOF MS (50 - 1000) from 0.123 to 0.193 min

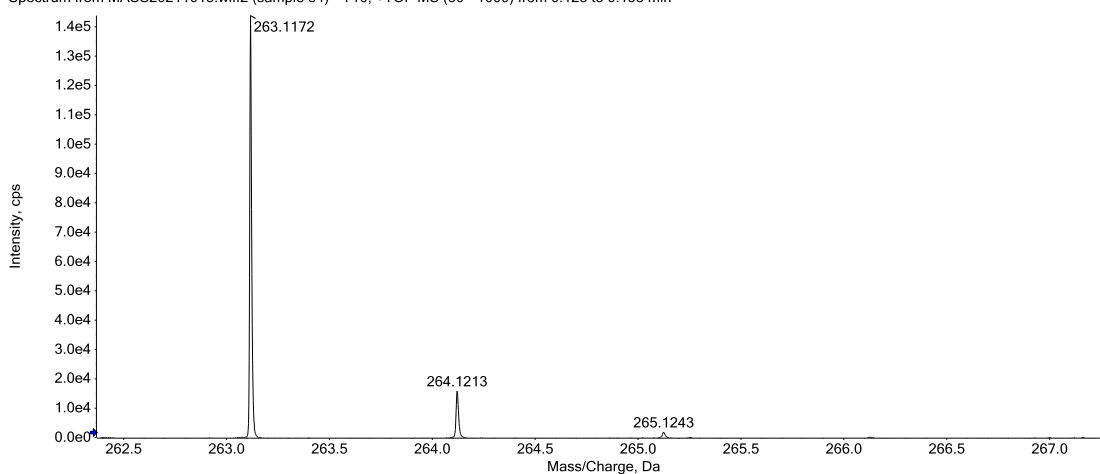

| Hit | Formula   | m/z      | RDB  | ppm  | MS Rank | MSMS ppm | MSMS Rank | Found |
|-----|-----------|----------|------|------|---------|----------|-----------|-------|
| 1   | C17H14N2O | 263.1179 | 12.0 | -2.6 | 1       |          |           | NA/NA |

## HR-MS spectrum of 1h

Spectrum from MASS20211013.wiff2 (sample 28) - Y4, +TOF MS (50 - 1000) from 0.088 to 0.158 min

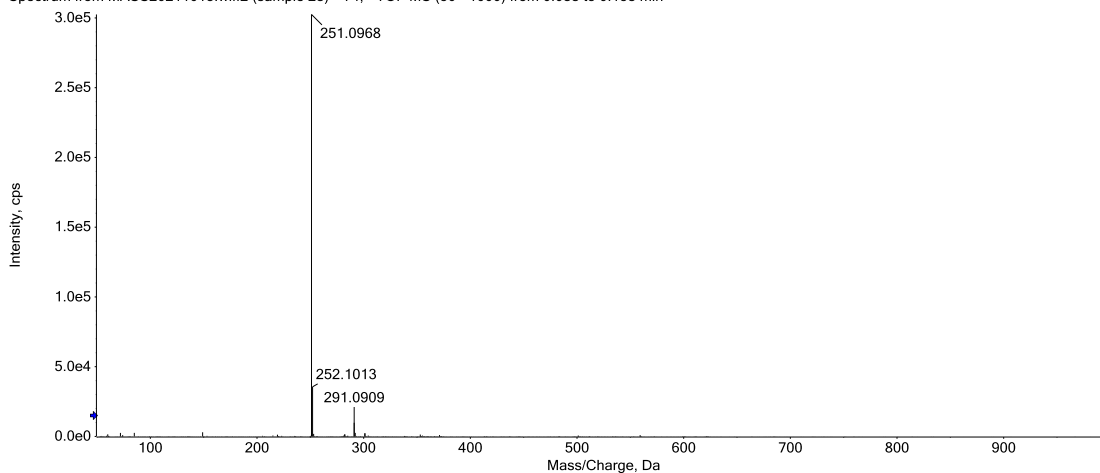



Spectrum from MASS20211013.wiff2 (sample 28) - Y4, +TOF MS (50 - 1000) from 0.088 to 0.158 min

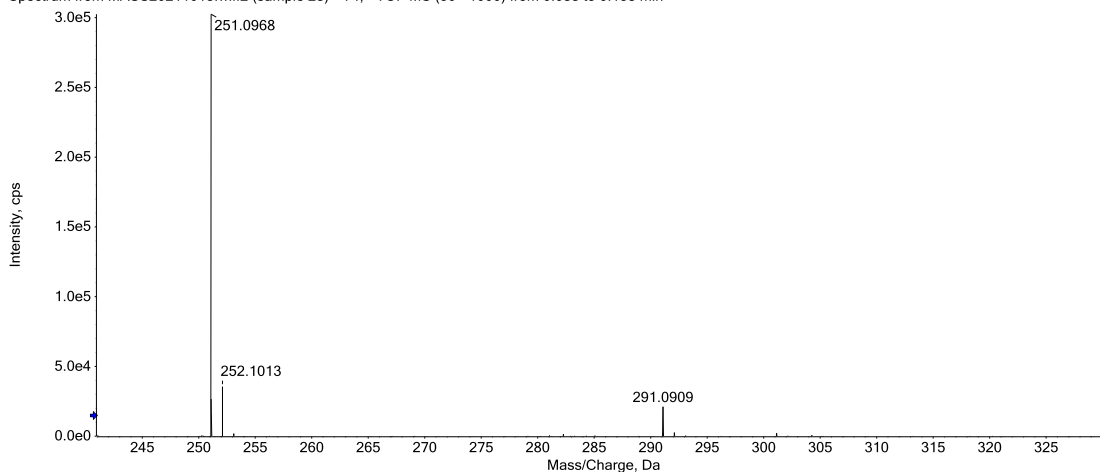

| Hit | Formula    | m/z      | RDB  | ppm | MS Rank | MSMS ppm | MSMS Rank | Found |
|-----|------------|----------|------|-----|---------|----------|-----------|-------|
| 1   | C16H13FN2O | 291.0904 | 11.0 | 1.7 | 1       |          |           | NA/NA |

## HR-MS spectrum of 1i

Spectrum from MASS20211013.wiff2 (sample 25) - Y1, +TOF MS (50 - 1000) from 0.264 to 0.308 min

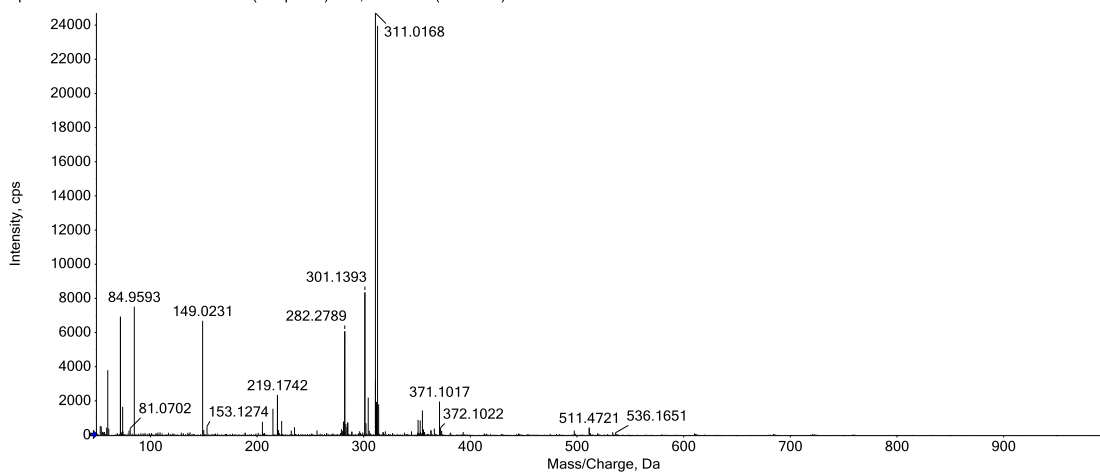

Spectrum from MASS20211013.wiff2 (sample 25) - Y1, +TOF MS (50 - 1000) from 0.264 to 0.308 min

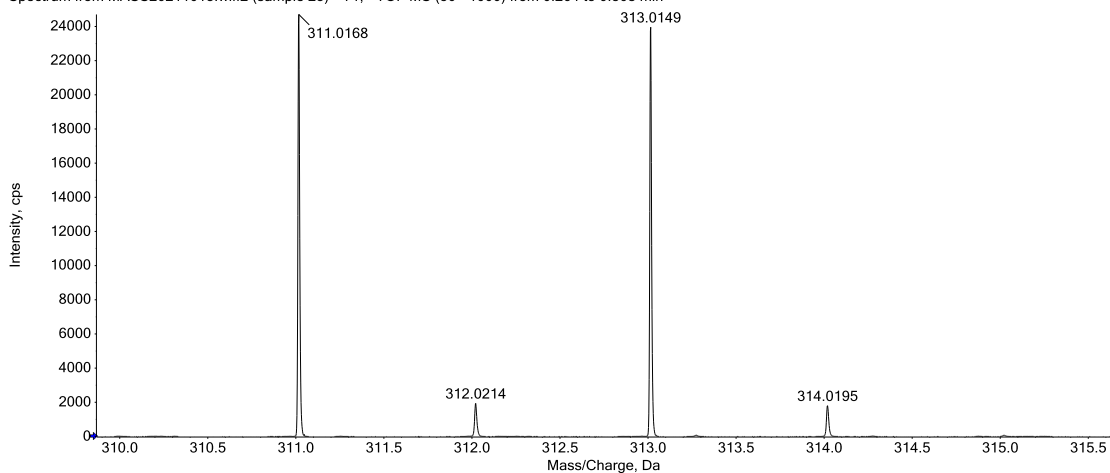

| Hit | Formula    | m/z      | RDB  | ppm  | MS Rank | MSMS ppm | MSMS Rank | Found |
|-----|------------|----------|------|------|---------|----------|-----------|-------|
| 1   | C16H11BrN2 | 311.0178 | 12.0 | -3.3 | 1       |          |           | NA/NA |

# HR-MS spectrum of 1j

Spectrum from MASS20211013.wiff2 (sample 40) - Y16, +TOF MS (50 - 1000) from 0.114 to 0.184 min

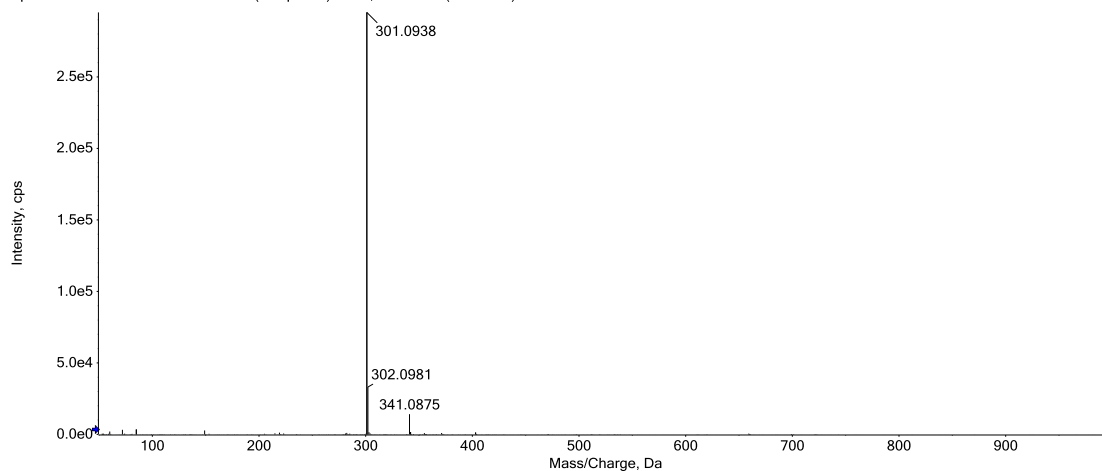

Spectrum from MASS20211013.wiff2 (sample 40) - Y16, +TOF MS (50 - 1000) from 0.114 to 0.184 min

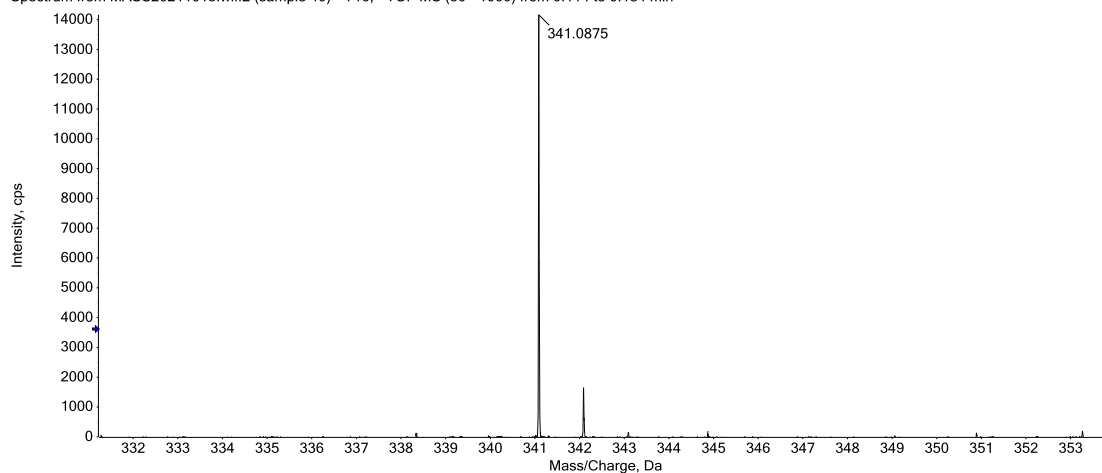

Spectrum from MASS20211013.wiff2 (sample 40) - Y16, +TOF MS (50 - 1000) from 0.114 to 0.184 min

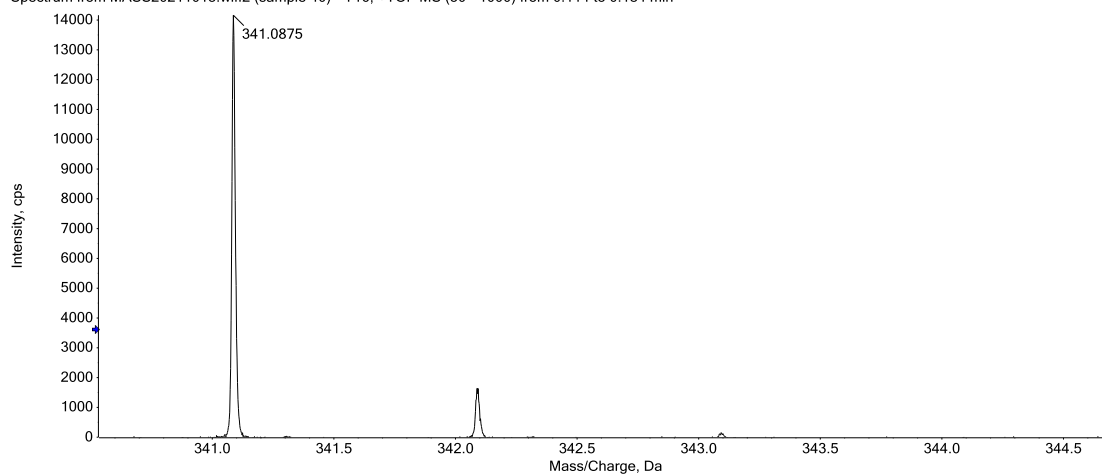

| Hit | Formula     | m/z      | RDB  | ppm | MS Rank | MSMS ppm | MSMS Rank | Found |
|-----|-------------|----------|------|-----|---------|----------|-----------|-------|
| 1   | C17H13F3N2O | 341.0872 | 11.0 | 0.8 | 1       |          |           | NA/NA |

## HR-MS spectrum of 1k

Spectrum from MASS20210609.wiff2 (sample 57) - Y10, +TOF MS (50 - 1000) from 0.132 to 0.167 min

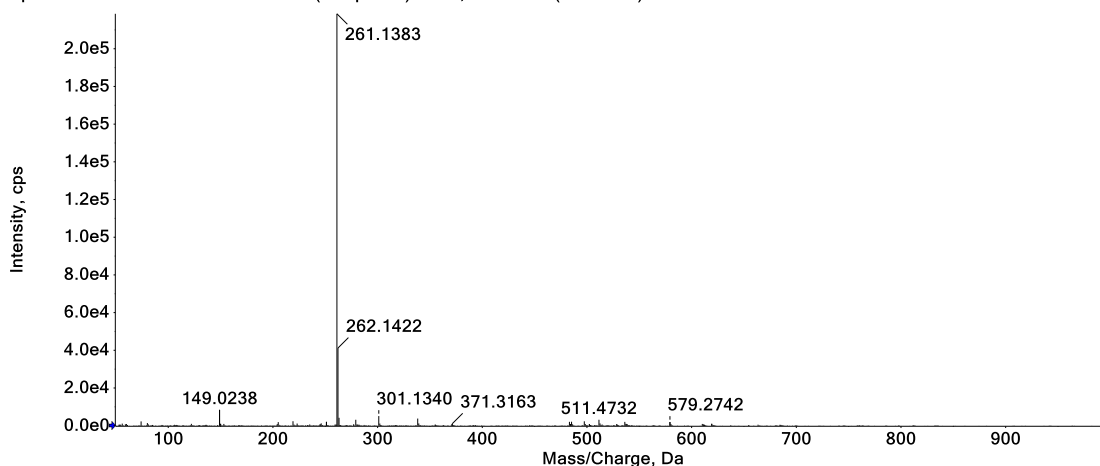

Spectrum from MASS20210609.wiff2 (sample 57) - Y10, +TOF MS (50 - 1000) from 0.132 to 0.167 min

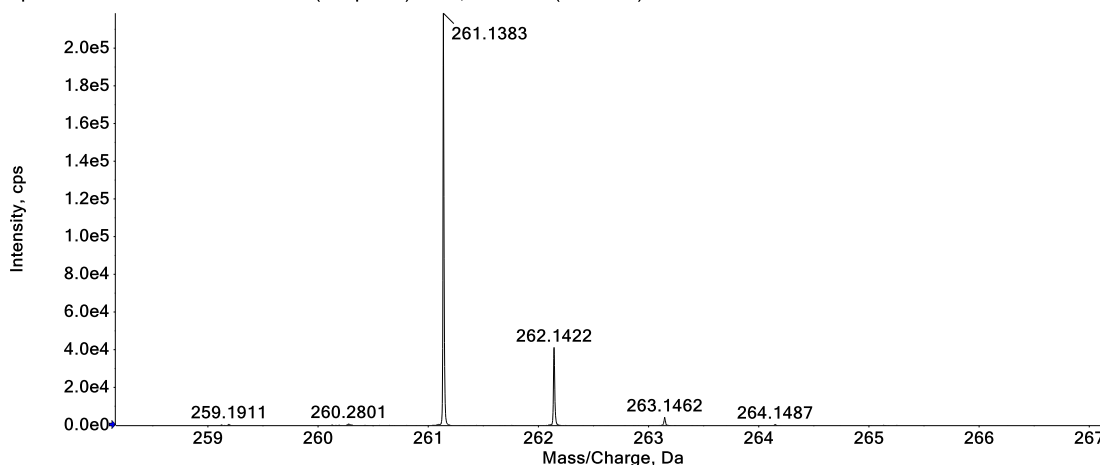

| Hit | Formula  | m/z      | RDB  | ppm  | MS Rank | MSMS ppm | MSMS Rank | Found |
|-----|----------|----------|------|------|---------|----------|-----------|-------|
| 1   | C18H16N2 | 261.1386 | 12.0 | -1.2 | 1       |          |           | NA/NA |

## HR-MS spectrum of 1l

Spectrum from MASS20210609.wiff2 (sample 60) - Y13, +TOF MS (50 - 1000) from 0.132 to 0.167 min

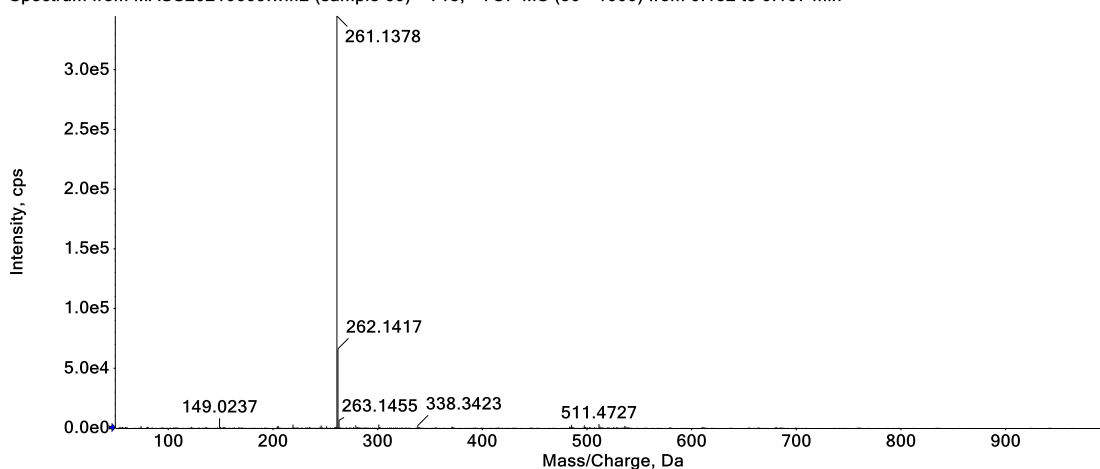

Spectrum from MASS20210609.wiff2 (sample 60) - Y13, +TOF MS (50 - 1000) from 0.132 to 0.167 min

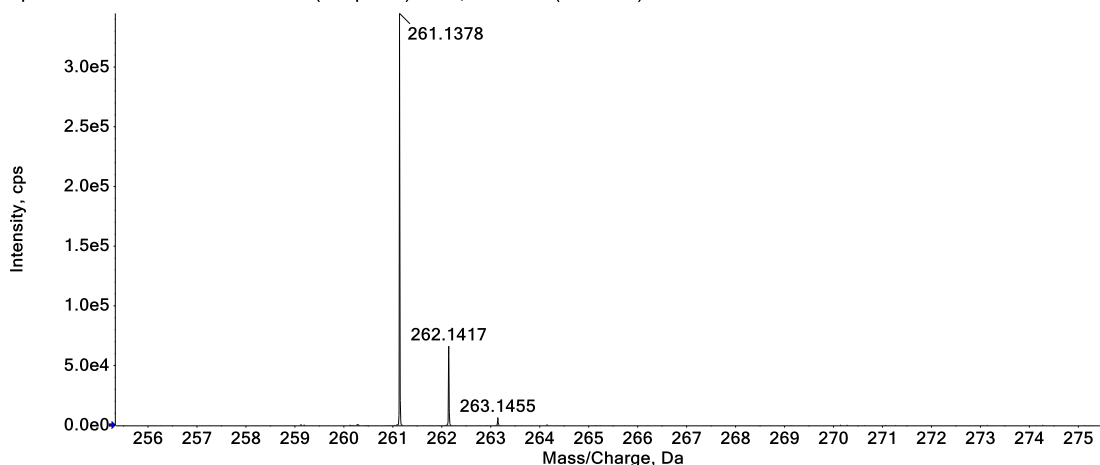

| Hit | Formula  | m/z      | RDB  | ppm  | MS Rank | MSMS ppm | MSMS Rank | Found |
|-----|----------|----------|------|------|---------|----------|-----------|-------|
| 1   | C18H16N2 | 261.1386 | 12.0 | -3.2 | 1       |          |           | NA/NA |

## HR-MS spectrum of 1m

Spectrum from MASS20210609.wiff2 (sample 53) - Y6, +TOF MS (50 - 1000) from 0.132 to 0.167 min

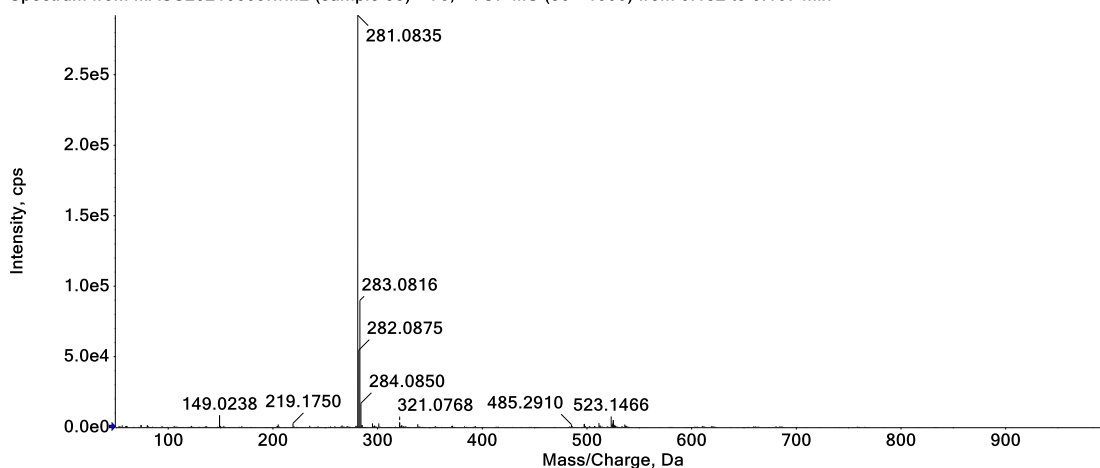

Spectrum from MASS20210609.wiff2 (sample 53) - Y6, +TOF MS (50 - 1000) from 0.132 to 0.167 min

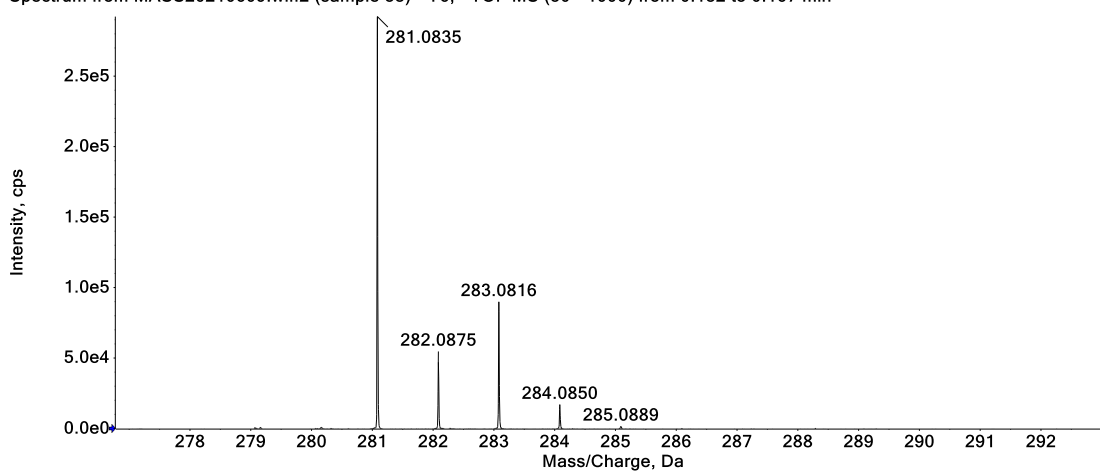

| Hit | Formula    | m/z      | RDB  | ppm  | MS Rank | MSMS ppm | MSMS Rank | Found |
|-----|------------|----------|------|------|---------|----------|-----------|-------|
| 1   | C17H13C1N2 | 281.0840 | 12.0 | -1.8 | 1       |          |           | NA/NA |

# HR-MS spectrum of 1n

Spectrum from MASS20210609.wiff2 (sample 68) - Y21, +TOF MS (50 - 1000) from 0.079 to 0.114 min

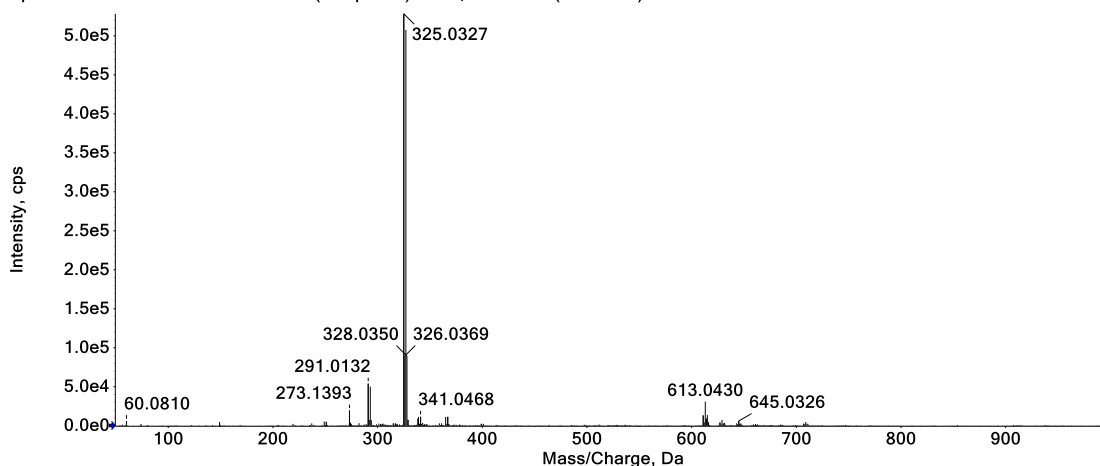

Spectrum from MASS20210609.wiff2 (sample 68) - Y21, +TOF MS (50 - 1000) from 0.079 to 0.114 min

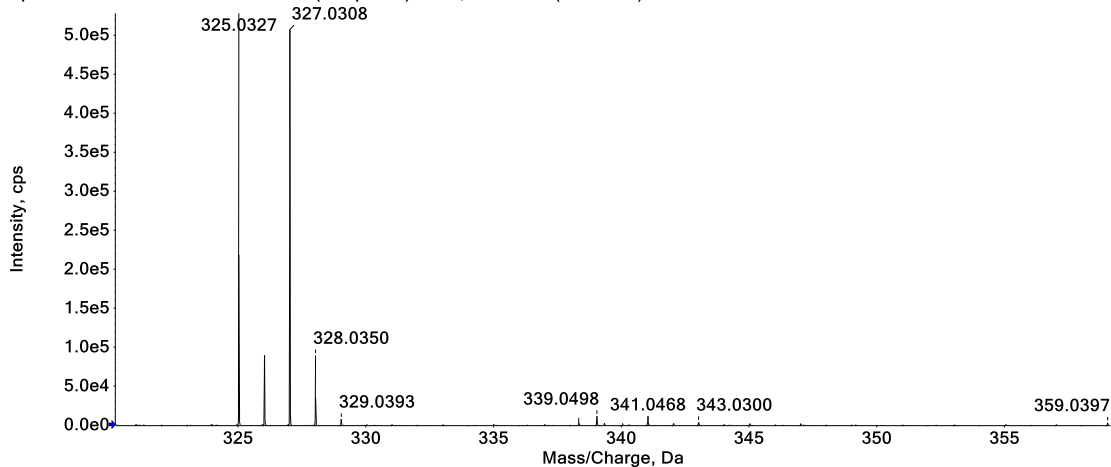

Spectrum from MASS20210609.wiff2 (sample 68) - Y21, +TOF MS (50 - 1000) from 0.079 to 0.114 min

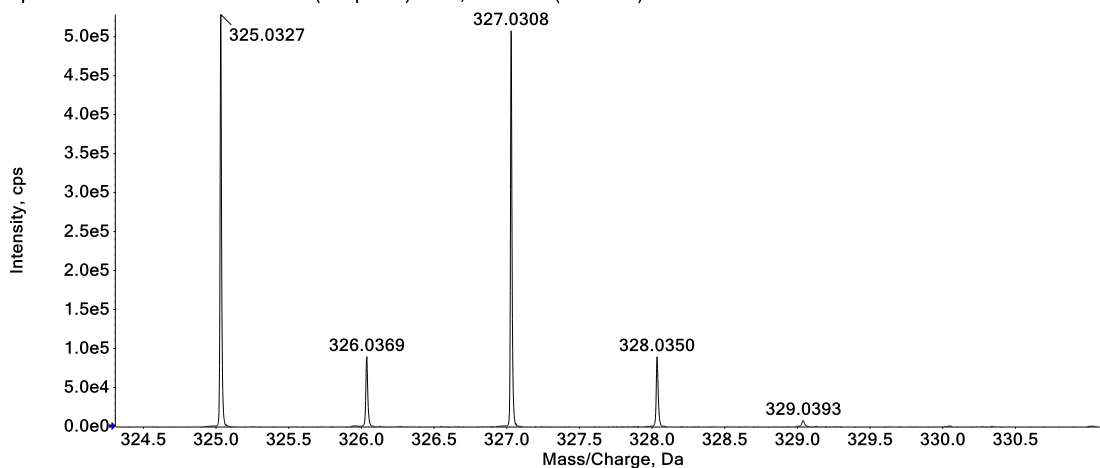

| Hit | Formula    | m/z      | RDB  | ppm  | MS Rank | MSMS ppm | MSMS Rank | Found |
|-----|------------|----------|------|------|---------|----------|-----------|-------|
| 1   | C17H13BrN2 | 325.0335 | 12.0 | -2.4 | 1       |          |           | NA/NA |

## HR-MS spectrum of 1o

Spectrum from MASS20210609.wiff2 (sample 72) - Y25, +TOF MS (50 - 1000) from 0.079 to 0.114 min

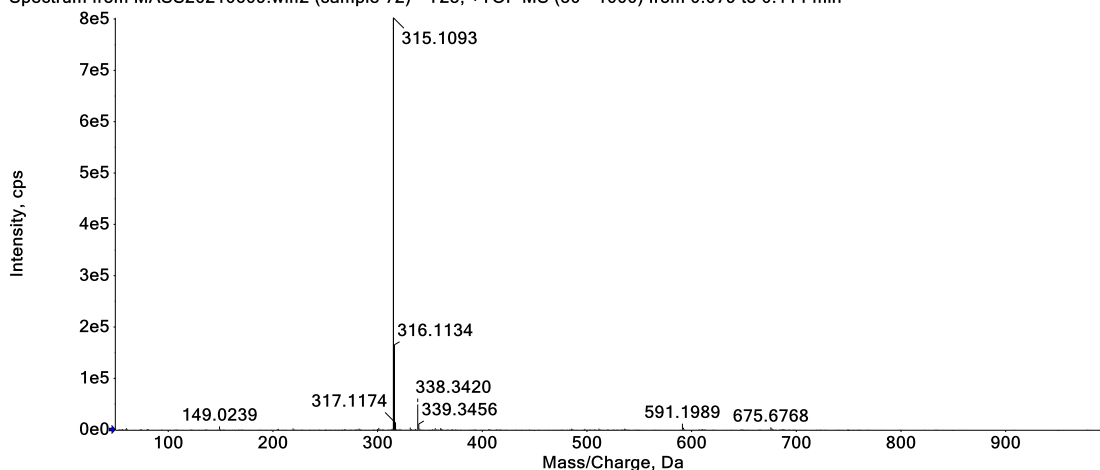

Spectrum from MASS20210609.wiff2 (sample 72) - Y25, +TOF MS (50 - 1000) from 0.079 to 0.114 min

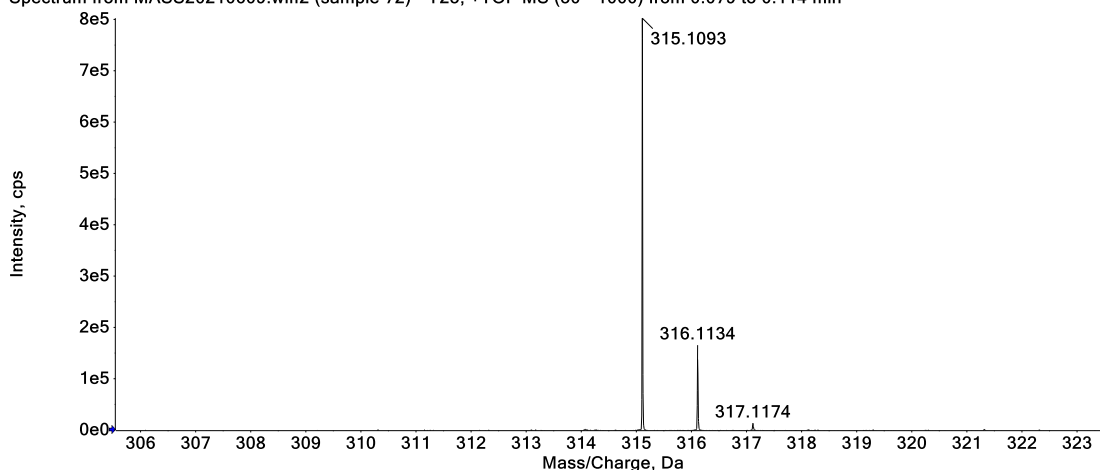

| Hit | Formula    | m/z      | RDB  | ppm  | MS Rank | MSMS ppm | MSMS Rank | Found |
|-----|------------|----------|------|------|---------|----------|-----------|-------|
| 1   | C18H13F3N2 | 315.1104 | 12.0 | -3.4 | 1       |          |           | NA/NA |

## HR-MS spectrum of 1p

Spectrum from MASS202100707.wiff2 (sample 10) - Y10, +TOF MS (50 - 1000) from 0.158 to 0.193 min

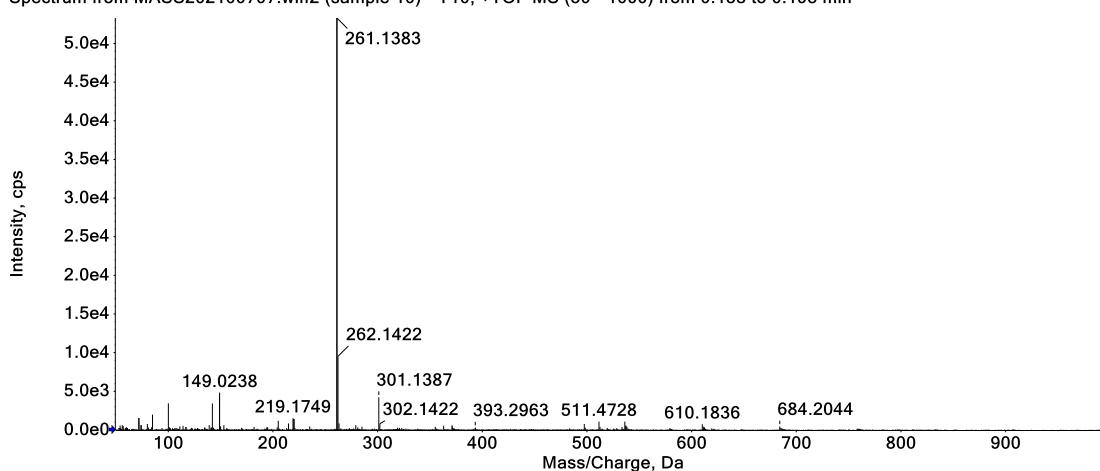

Spectrum from MASS202100707.wiff2 (sample 10) - Y10, +TOF MS (50 - 1000) from 0.158 to 0.193 min

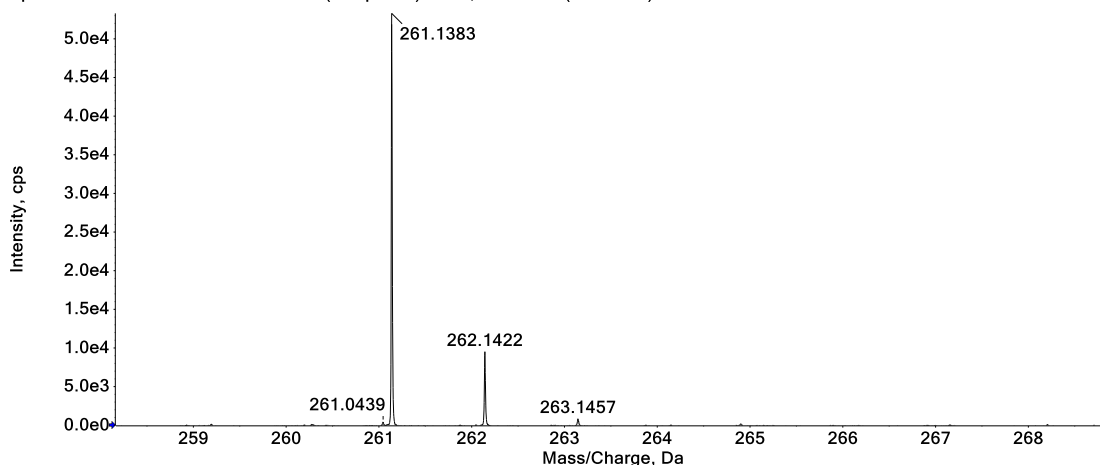

| Hit | Formula                                        | m/z      | RDB  | ppm  | MS Rank | MSMS ppm | MSMS Rank | Found |
|-----|------------------------------------------------|----------|------|------|---------|----------|-----------|-------|
| 1   | C <sub>18</sub> H <sub>16</sub> N <sub>2</sub> | 261.1386 | 12.0 | -1.2 | 1       |          |           | NA/NA |

### HR-MS spectrum of 1q

Spectrum from MASS20210609.wiff2 (sample 74) - Y27, +TOF MS (50 - 1000) from 0.079 to 0.114 min

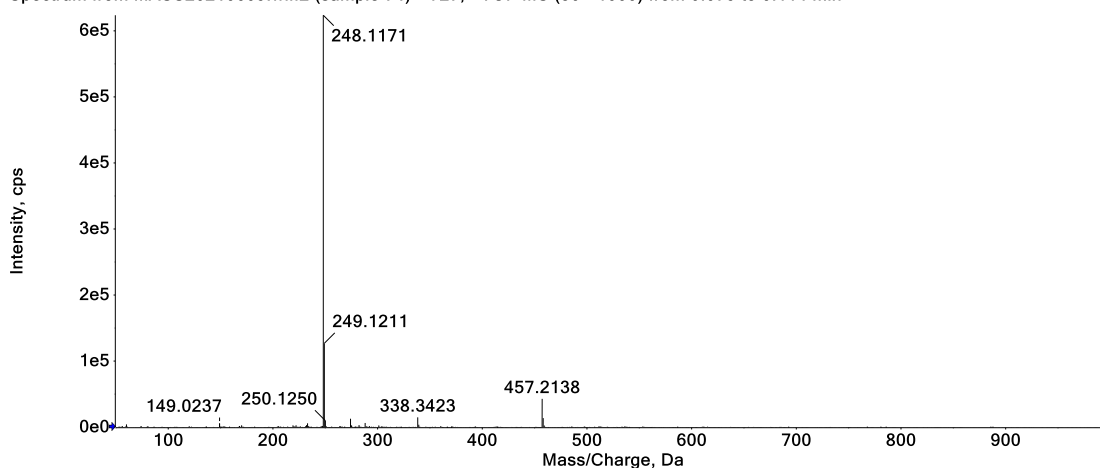

Spectrum from MASS20210609.wiff2 (sample 74) - Y27, +TOF MS (50 - 1000) from 0.079 to 0.114 min

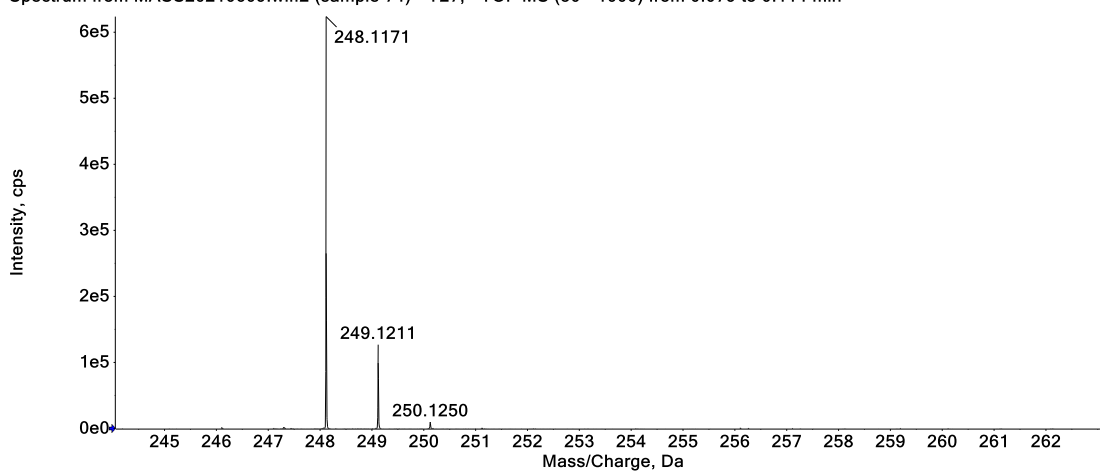

| Hit | Formula                                        | m/z      | RDB  | ppm  | MS Rank | MSMS ppm | MSMS Rank | Found |
|-----|------------------------------------------------|----------|------|------|---------|----------|-----------|-------|
| 1   | C <sub>16</sub> H <sub>13</sub> N <sub>3</sub> | 248.1182 | 12.0 | -4.5 | 1       |          |           | NA/NA |

## HR-MS spectrum of 1r

Spectrum from MASS20210609.wiff2 (sample 63) - Y16, +TOF MS (50 - 1000) from 0.132 to 0.167 min

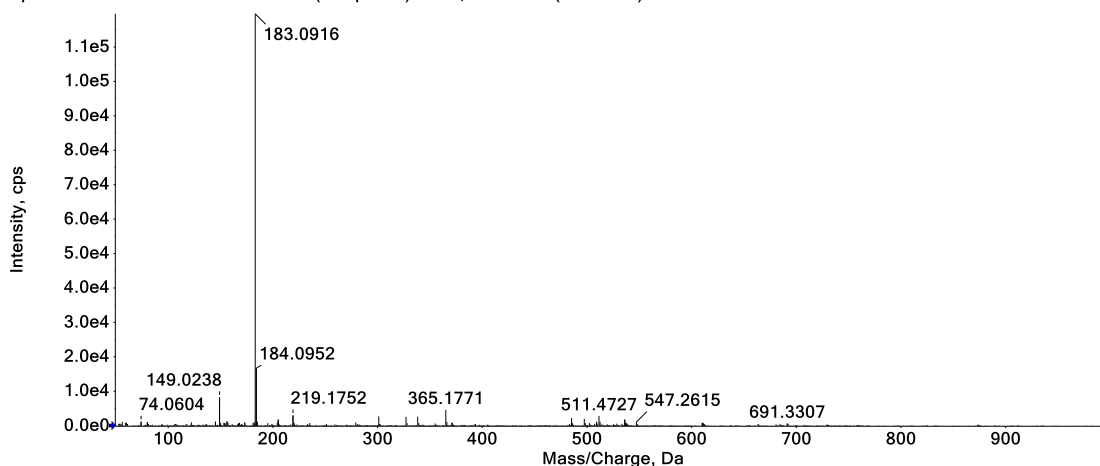

Spectrum from MASS20210609.wiff2 (sample 63) - Y16, +TOF MS (50 - 1000) from 0.132 to 0.167 min

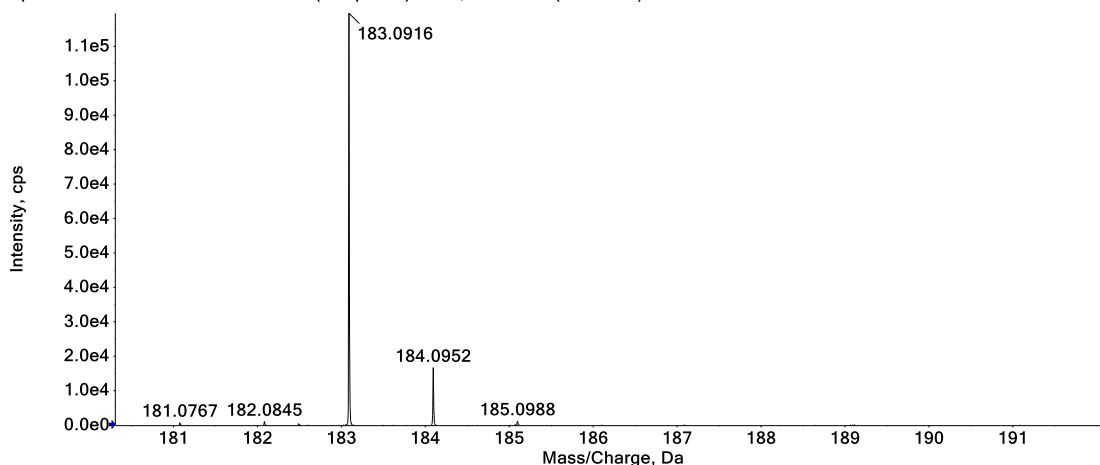

| Hit | Formula  | m/z      | RDB | ppm  | MS Rank | MSMS ppm | MSMS Rank | Found |
|-----|----------|----------|-----|------|---------|----------|-----------|-------|
| 1   | C12H10N2 | 183.0917 | 9.0 | -0.4 | 1       |          |           | NA/NA |

## HR-MS spectrum of 1u

Spectrum from MASS20220928.wiff2 (sample 3) - Y2, Experiment 1, +IDA TOF MS (50 - 1000) from 0.072 to 0.111 min

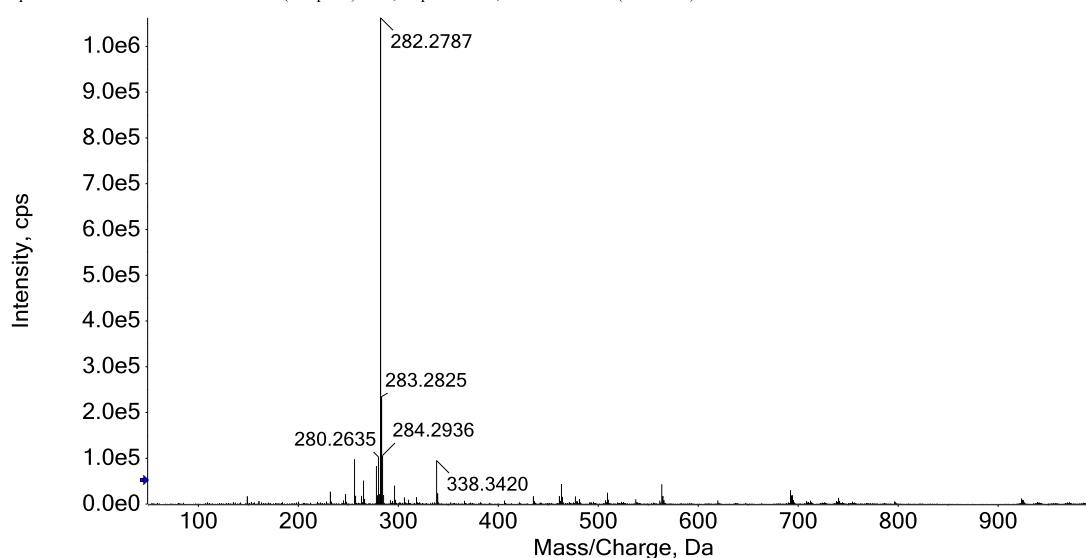



Spectrum from MASS20220928.wiff2 (sample 3) - Y2, Experiment 1, +IDA T...) - Y2, Experiment 1, +IDA TOF MS (50 - 1000) from 0.135 to 0.222 min]

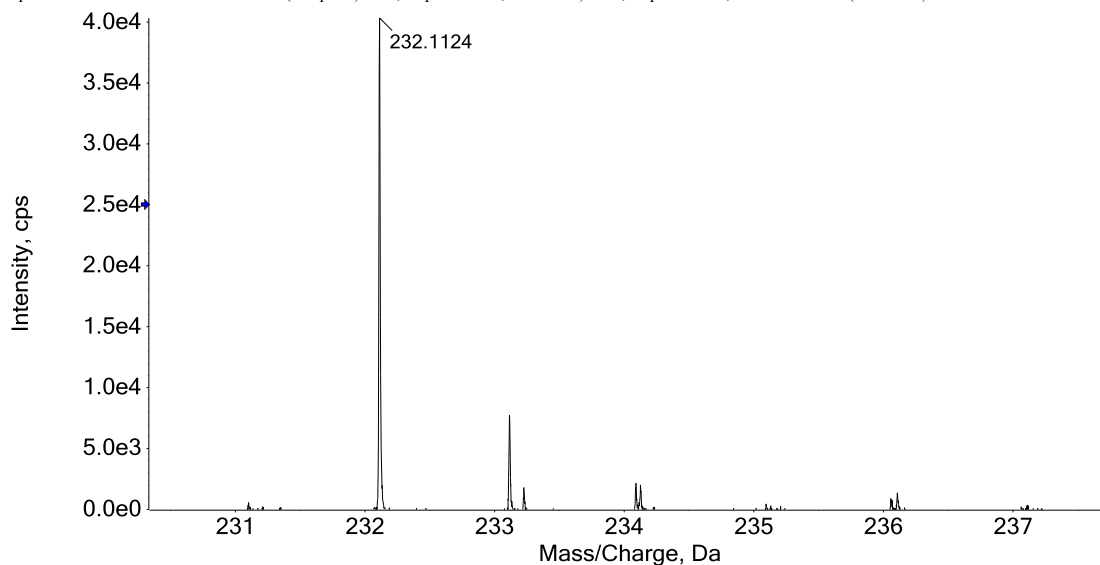

| Hit | Formula | m/z      | RDB  | ppm | MS Rank | MSMS ppm | MSMS Rank | Found |
|-----|---------|----------|------|-----|---------|----------|-----------|-------|
| 1   | C17H13N | 232.1121 | 12.0 | 1.4 | 1       |          |           | NA/NA |

### HR-MS spectrum of 3a

Spectrum from MASS20210609.wiff2 (sample 49) - Y2, +TOF MS (50 - 1000) from 0.132 to 0.167 min

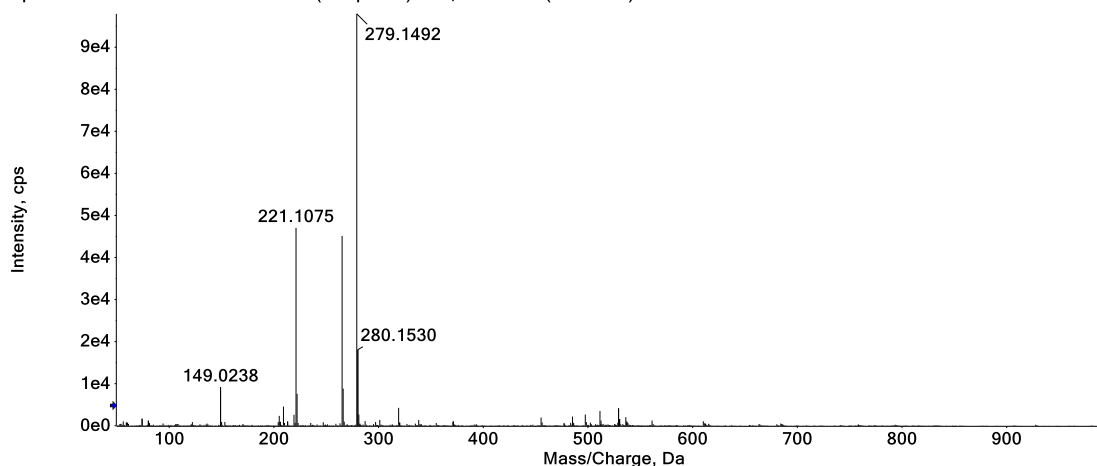

Spectrum from MASS20210609.wiff2 (sample 49) - Y2, +TOF MS (50 - 1000) from 0.132 to 0.167 min

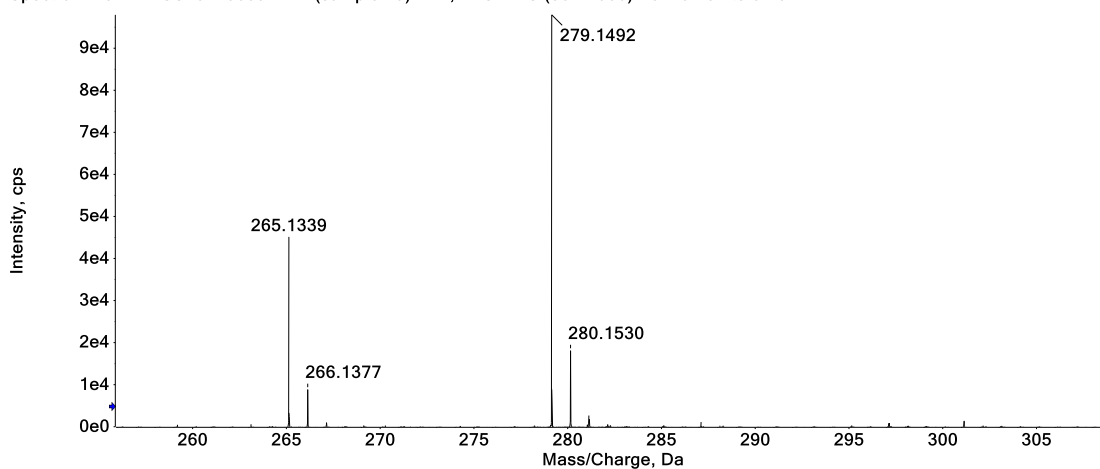

Spectrum from MASS20210609.wiff2 (sample 49) - Y2, +TOF MS (50 - 1000) from 0.132 to 0.167 min

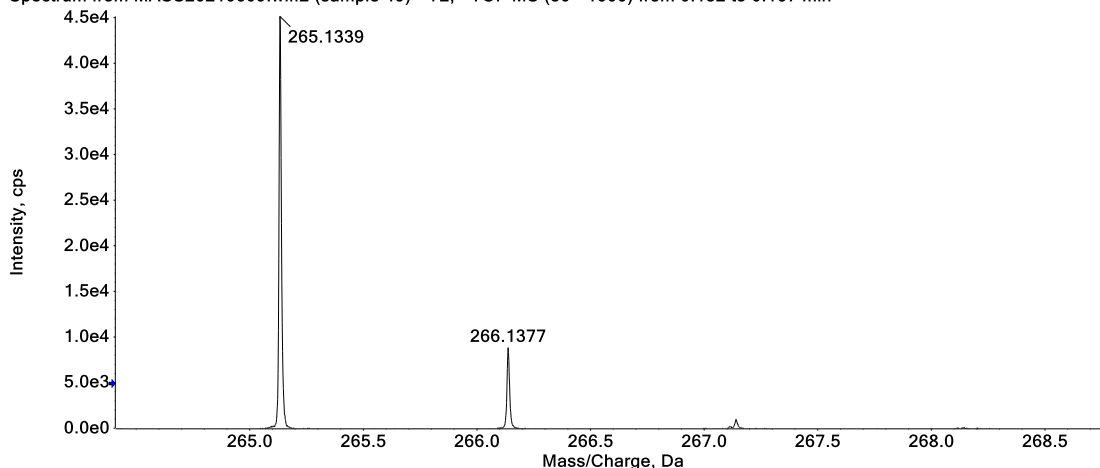

| Hit | Formula   | m/z      | RDB  | ppm | MS Rank | MSMS ppm | MSMS Rank | Found |
|-----|-----------|----------|------|-----|---------|----------|-----------|-------|
| 1   | C17H16N2O | 265.1335 | 11.0 | 1.4 | 1       |          |           | NA/NA |

### HR-MS spectrum of 3c

Spectrum from MASS20210120.wiff2 (sample 14) - Y3, +TOF MS (50 - 1000) from 0.105 to 0.158 min

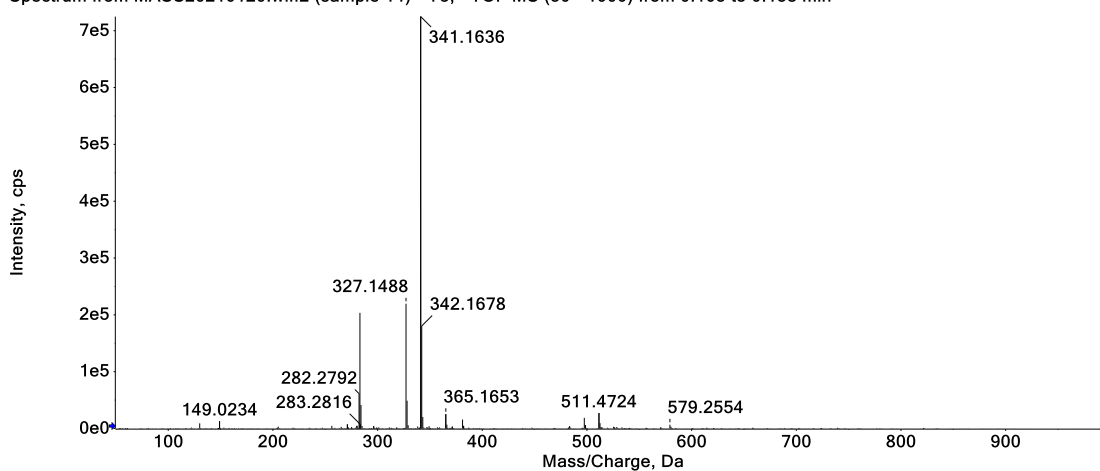

Spectrum from MASS20210120.wiff2 (sample 14) - Y3, +TOF MS (50 - 1000) from 0.105 to 0.158 min

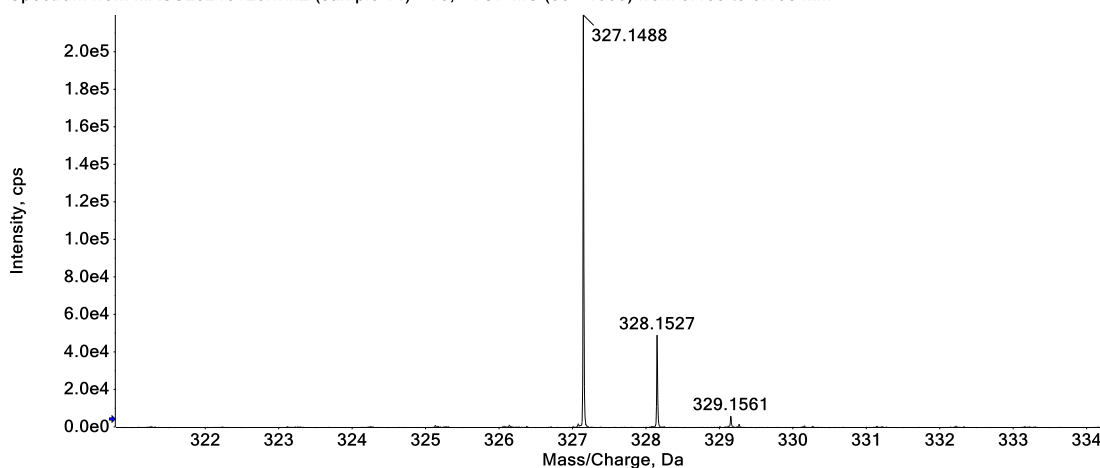

| Hit | Formula   | m/z      | RDB  | ppm  | MS Rank | MSMS ppm | MSMS Rank | Found |
|-----|-----------|----------|------|------|---------|----------|-----------|-------|
| 1   | C22H18N2O | 327.1492 | 15.0 | -1.2 | 1       |          |           | NA/NA |

## HR-MS spectrum of 3d

Spectrum from MASS202100707.wiff2 (sample 4) - Y4, +TOF MS (50 - 1000) from 0.158 to 0.193 min

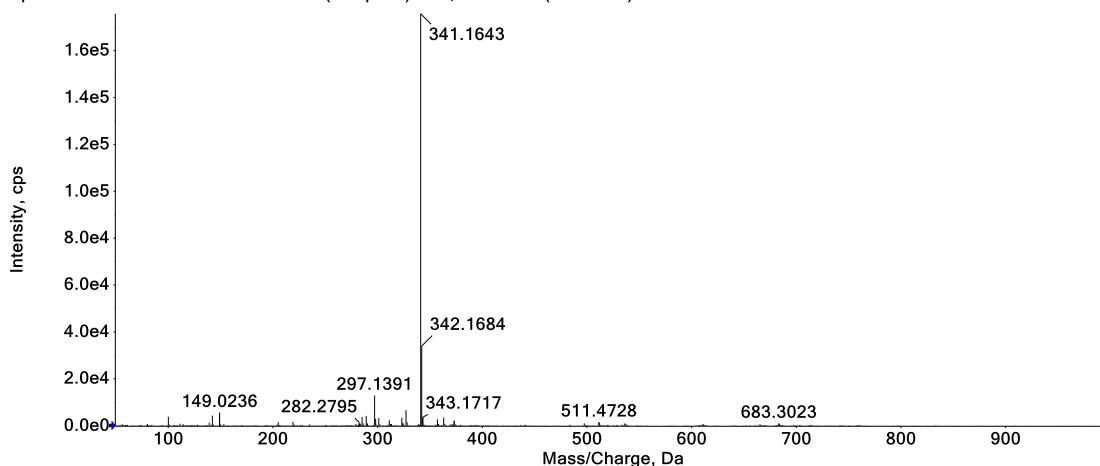

Spectrum from MASS202100707.wiff2 (sample 4) - Y4, +TOF MS (50 - 1000) from 0.158 to 0.193 min

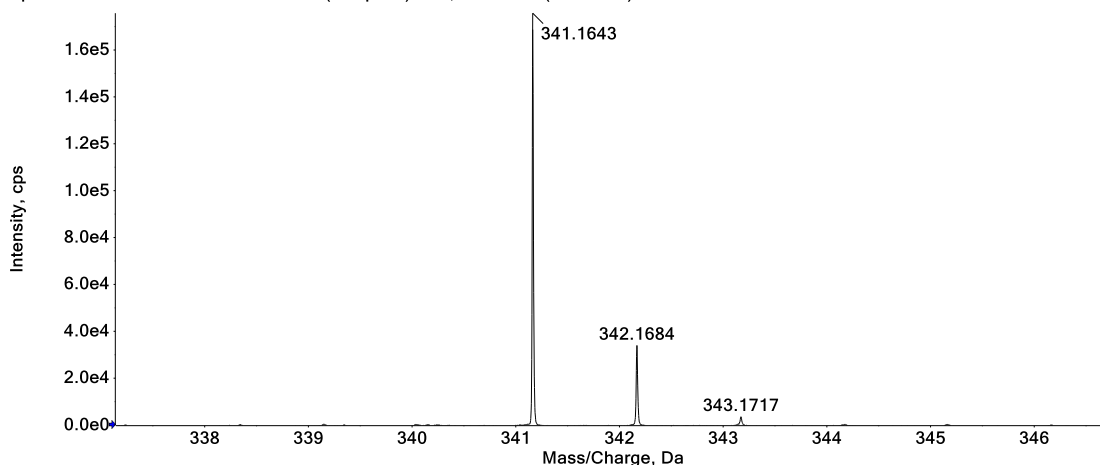

| Hit | Formula   | m/z      | RDB  | ppm  | MS Rank | MSMS ppm | MSMS Rank | Found |
|-----|-----------|----------|------|------|---------|----------|-----------|-------|
| 1   | C23H20N2O | 341.1648 | 15.0 | -1.6 | 1       |          |           | NA/NA |

## HR-MS spectrum of 3e

Spectrum from MASS20210609.wiff2 (sample 77) - Y30, +TOF MS (50 - 1000) from 0.079 to 0.114 min

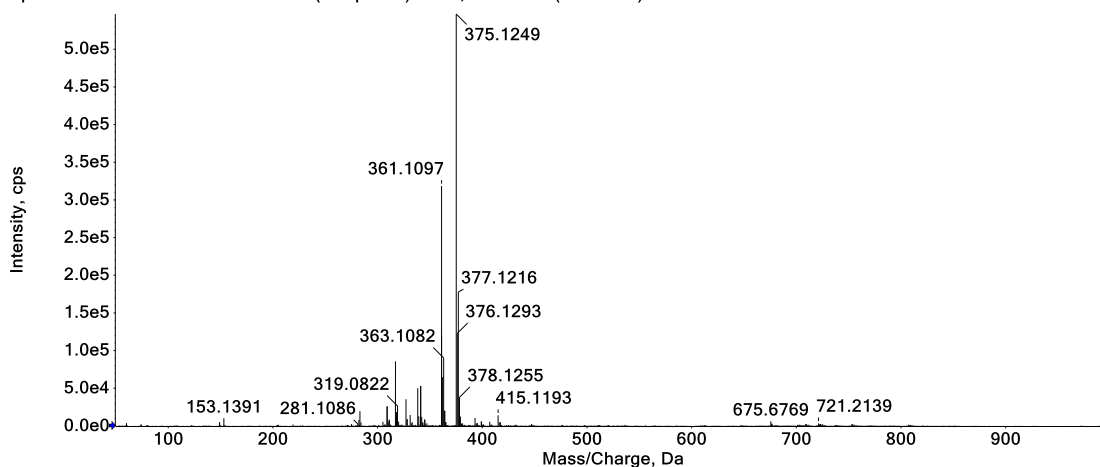

Spectrum from MASS20210609.wiff2 (sample 77) - Y30, +TOF MS (50 - 1000) from 0.079 to 0.114 min

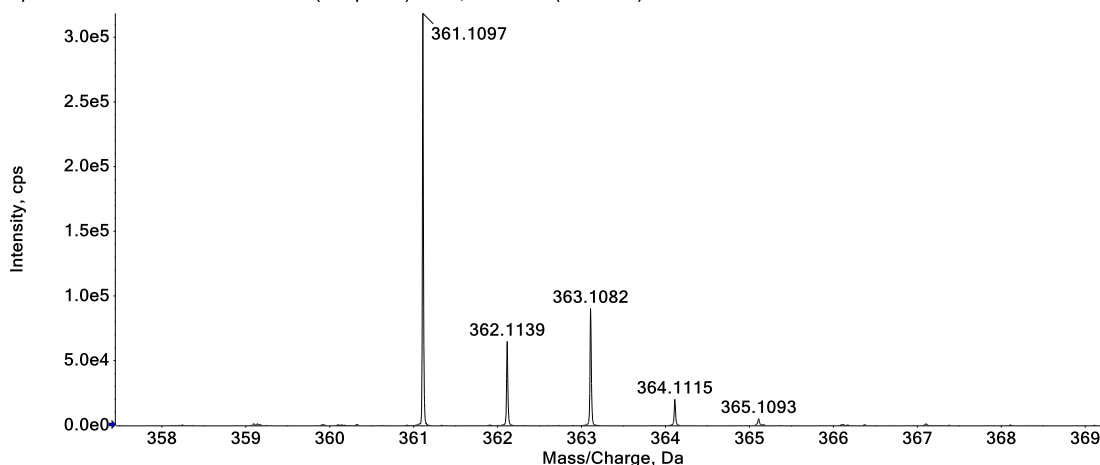

| Hit | Formula     | m/z      | RDB  | ppm  | MS Rank | MSMS ppm | MSMS Rank | Found |
|-----|-------------|----------|------|------|---------|----------|-----------|-------|
| 1   | C22H17C1N2O | 361.1102 | 15.0 | -1.4 | 1       |          |           | NA/NA |

## HR-MS spectrum of 3f

Spectrum from MASS20211013.wiff2 (sample 32) - Y8, +TOF MS (50 - 1000) from 0.123 to 0.193 min

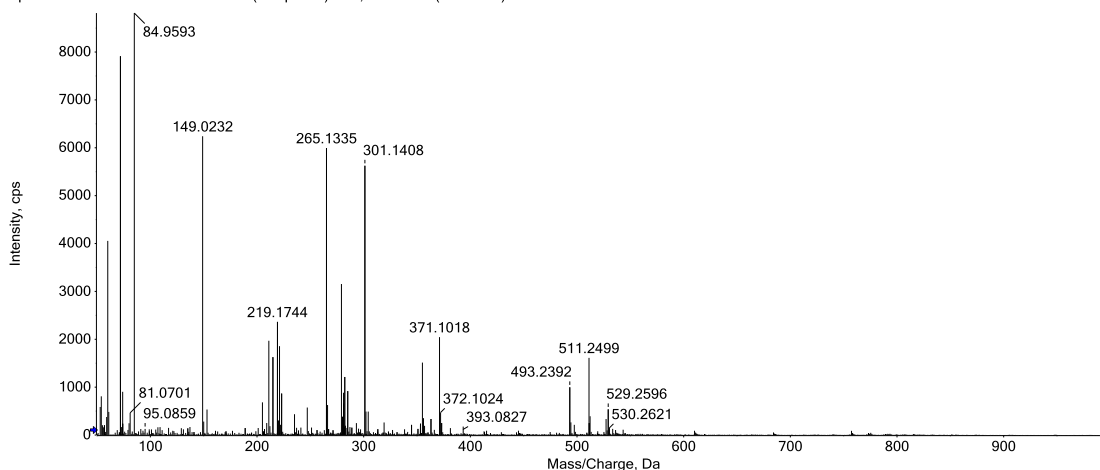

Spectrum from MASS20211013.wiff2 (sample 32) - Y8, +TOF MS (50 - 1000) from 0.123 to 0.193 min

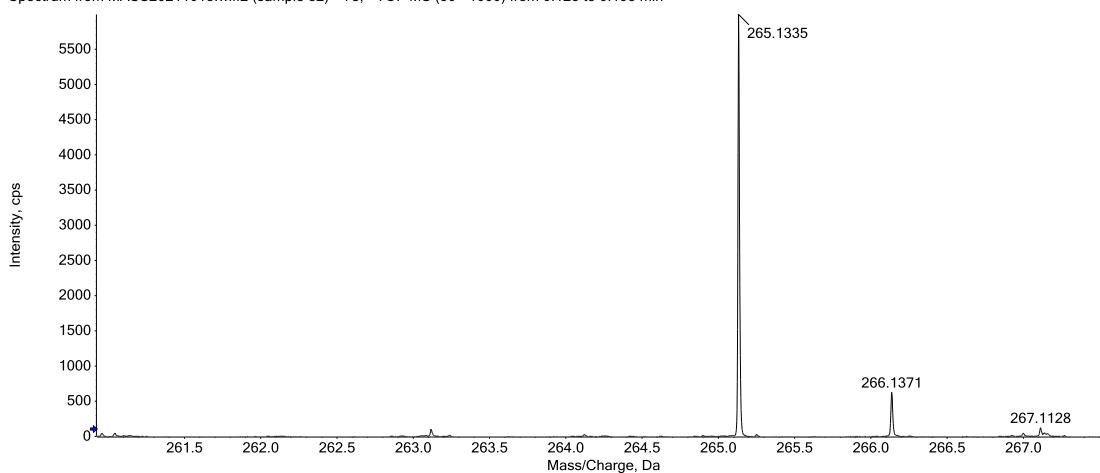

| Hit | Formula   | m/z      | RDB  | ppm  | MS Rank | MSMS ppm | MSMS Rank | Found |
|-----|-----------|----------|------|------|---------|----------|-----------|-------|
| 1   | C17H16N2O | 265.1335 | 11.0 | -0.1 | 1       |          |           | NA/NA |

## HR-MS spectrum of 3g

Spectrum from MASS20211013.wiff2 (sample 35) - Y11, +TOF MS (50 - 1000) from 0.123 to 0.193 min

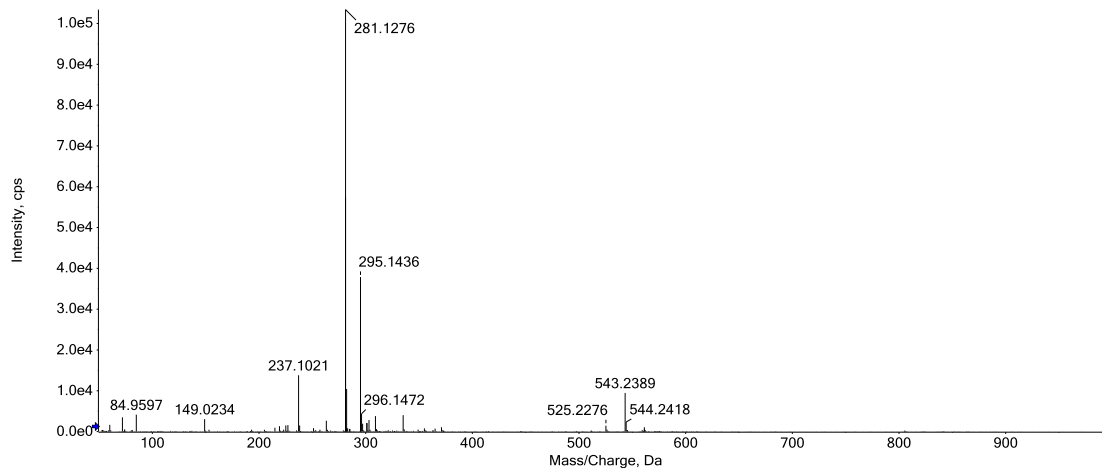

Spectrum from MASS20211013.wiff2 (sample 35) - Y11, +TOF MS (50 - 1000) from 0.123 to 0.193 min

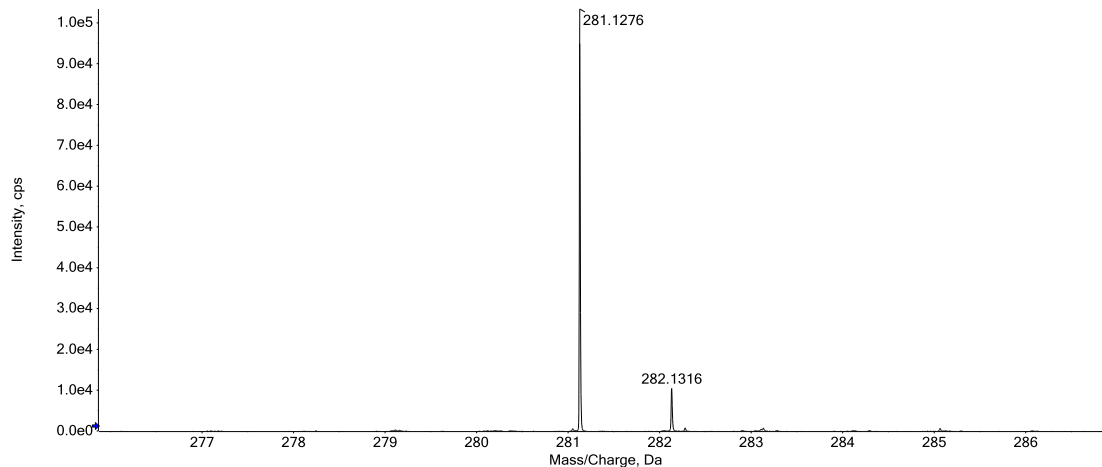

| Hit | Formula    | m/z      | RDB  | ppm  | MS Rank | MSMS ppm | MSMS Rank | Found |
|-----|------------|----------|------|------|---------|----------|-----------|-------|
| 1   | C17H16N2O2 | 281.1285 | 11.0 | -3.0 | 1       |          |           | NA/NA |

## HR-MS spectrum of 3h

Spectrum from MASS20211013.wiff2 (sample 29) - Y5, +TOF MS (50 - 1000) from 0.088 to 0.158 min

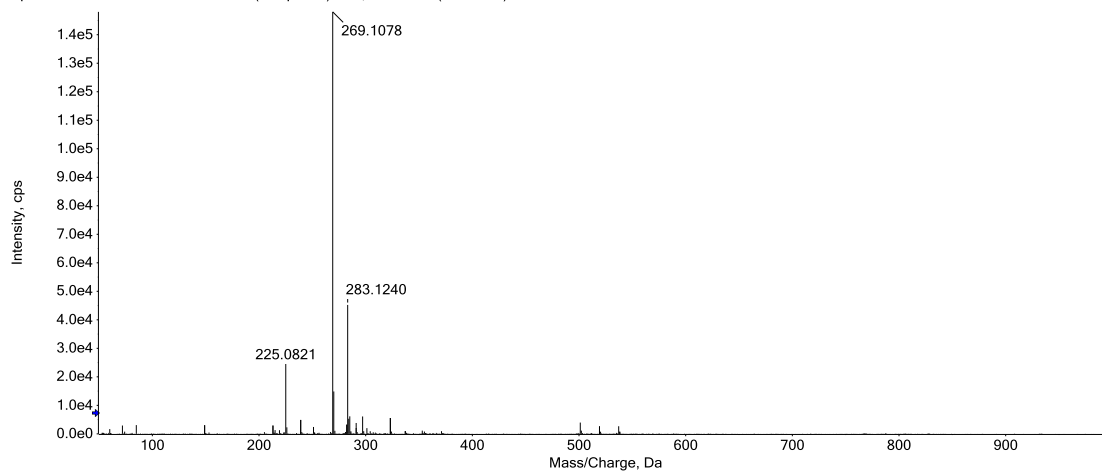

Spectrum from MASS20211013.wiff2 (sample 29) - Y5, +TOF MS (50 - 1000) from 0.088 to 0.158 min

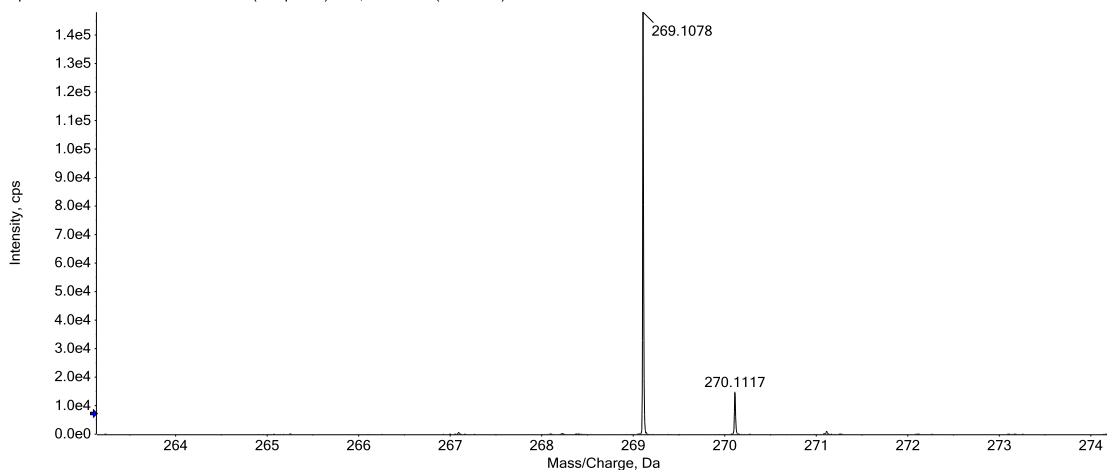

| Hit | Formula    | m/z      | RDB  | ppm  | MS Rank | MSMS ppm | MSMS Rank | Found |
|-----|------------|----------|------|------|---------|----------|-----------|-------|
| 1   | C16H13FN2O | 269.1085 | 11.0 | -2.5 | 1       |          |           | NA/NA |

## HR-MS spectrum of 3i

Spectrum from MASS20211013.wiff2 (sample 26) - Y2, +TOF MS (50 - 1000) from 0.264 to 0.308 min

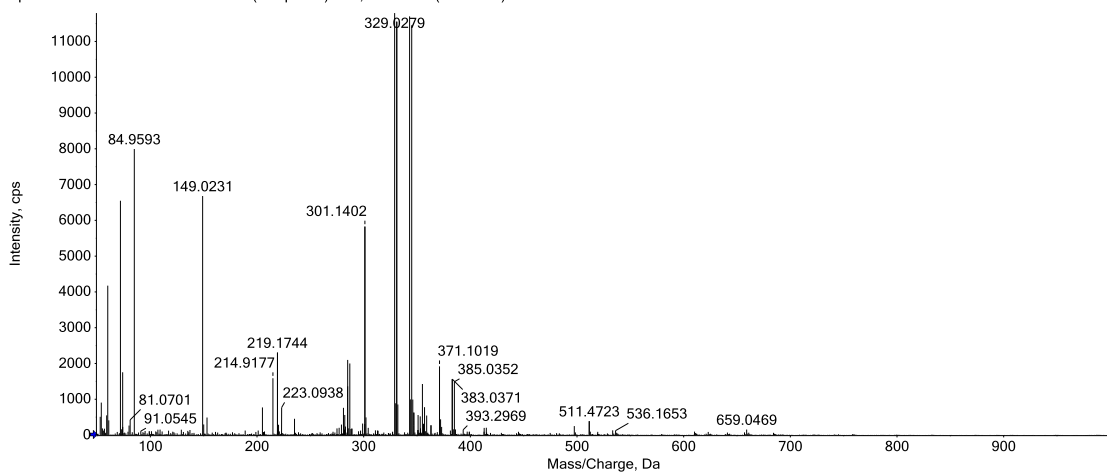

Spectrum from MASS20211013.wiff2 (sample 26) - Y2, +TOF MS (50 - 1000) from 0.264 to 0.308 min

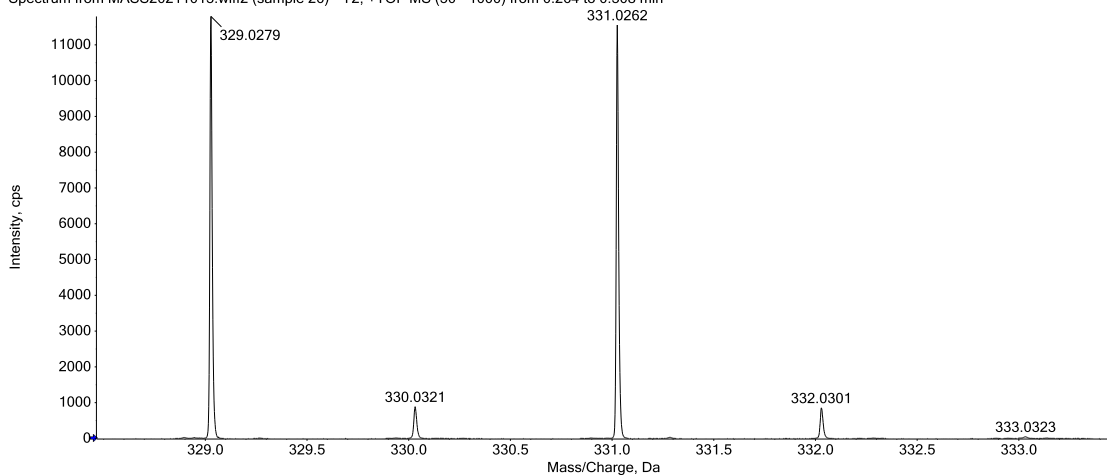

| Hit | Formula     | m/z      | RDB  | ppm  | MS Rank | MSMS ppm | MSMS Rank | Found |
|-----|-------------|----------|------|------|---------|----------|-----------|-------|
| 1   | C16H13BrN2O | 329.0284 | 11.0 | -1.5 | 1       |          |           | NA/NA |

## HR-MS spectrum of 3j

Spectrum from MASS20211013.wiff2 (sample 41) - Y17, +TOF MS (50 - 1000) from 0.114 to 0.184 min

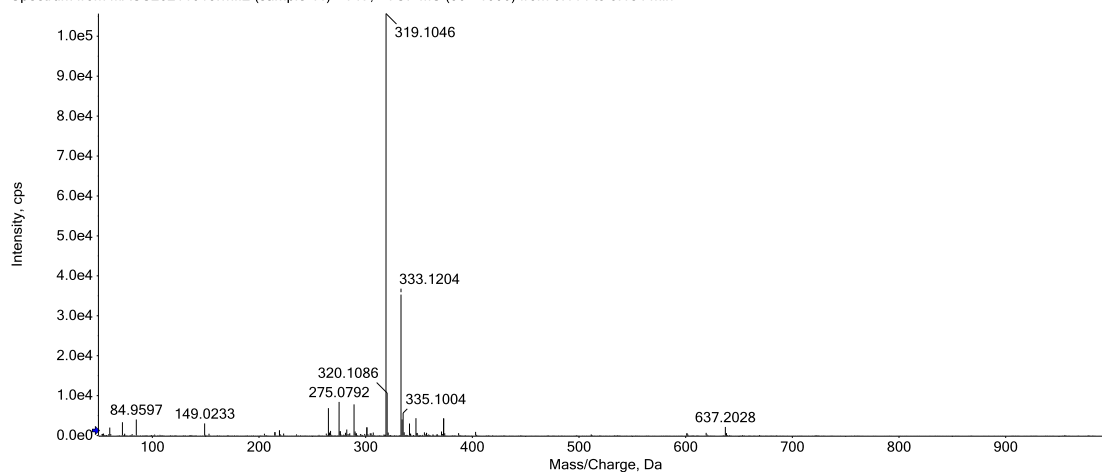

Spectrum from MASS20211013.wiff2 (sample 41) - Y17, +TOF MS (50 - 1000) from 0.114 to 0.184 min

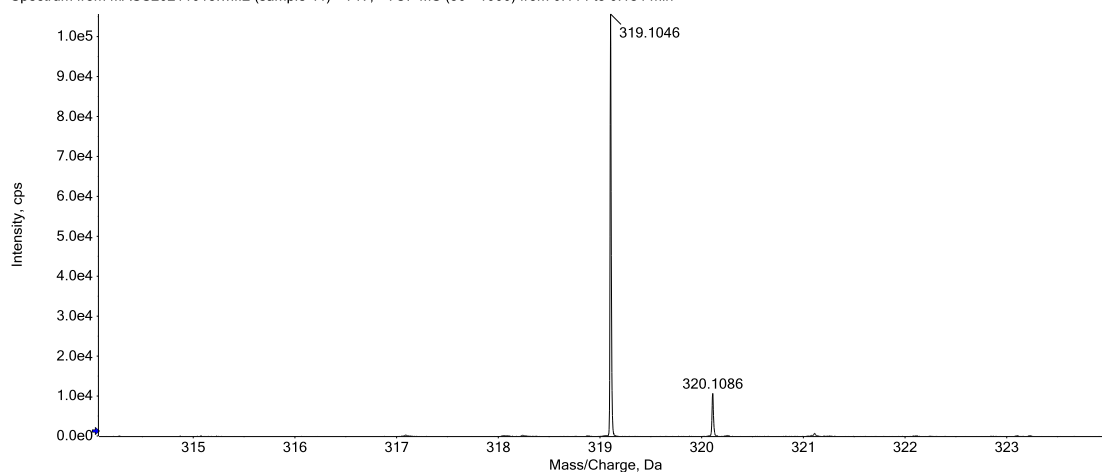

Spectrum from MASS20211013.wiff2 (sample 41) - Y17, +TOF MS (50 - 1000) from 0.114 to 0.184 min

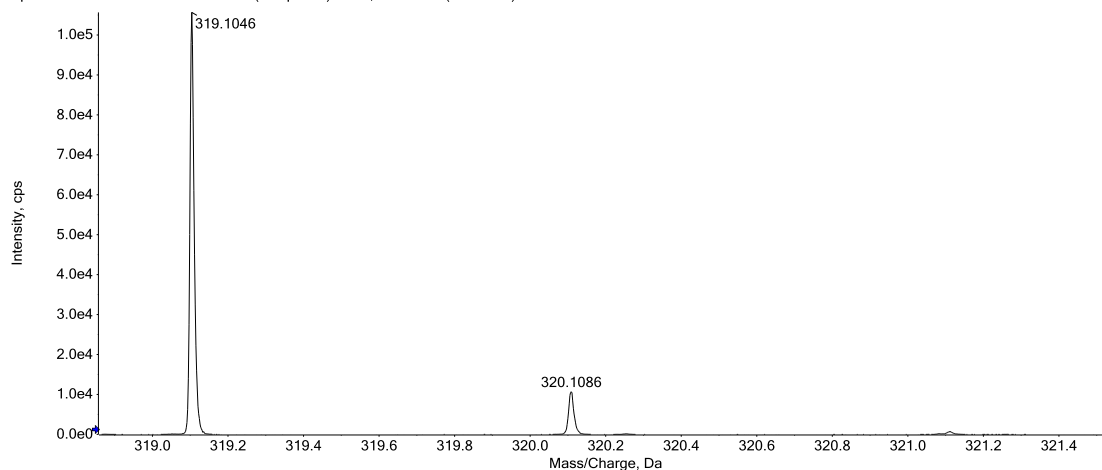

# HR-MS spectrum of 3k

Spectrum from MASS20210609.wiff2 (sample 58) - Y11, +TOF MS (50 - 1000) from 0.132 to 0.167 min

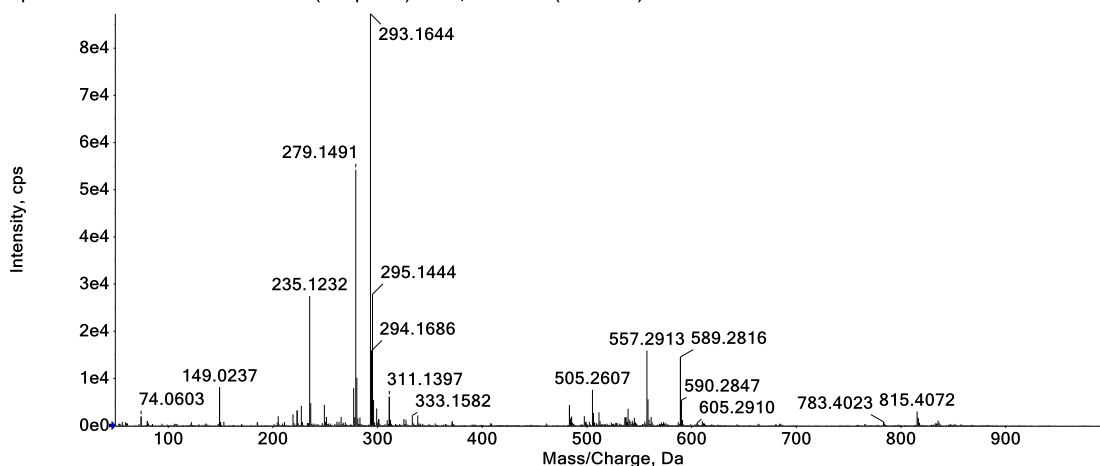

Spectrum from MASS20210609.wiff2 (sample 58) - Y11, +TOF MS (50 - 1000) from 0.132 to 0.167 min

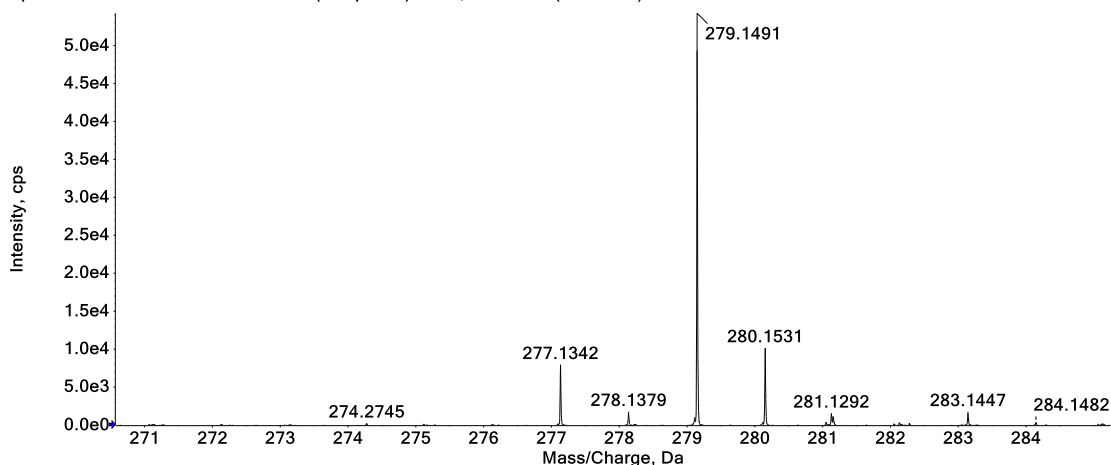

Spectrum from MASS20210609.wiff2 (sample 58) - Y11, +TOF MS (50 - 1000) from 0.132 to 0.167 min

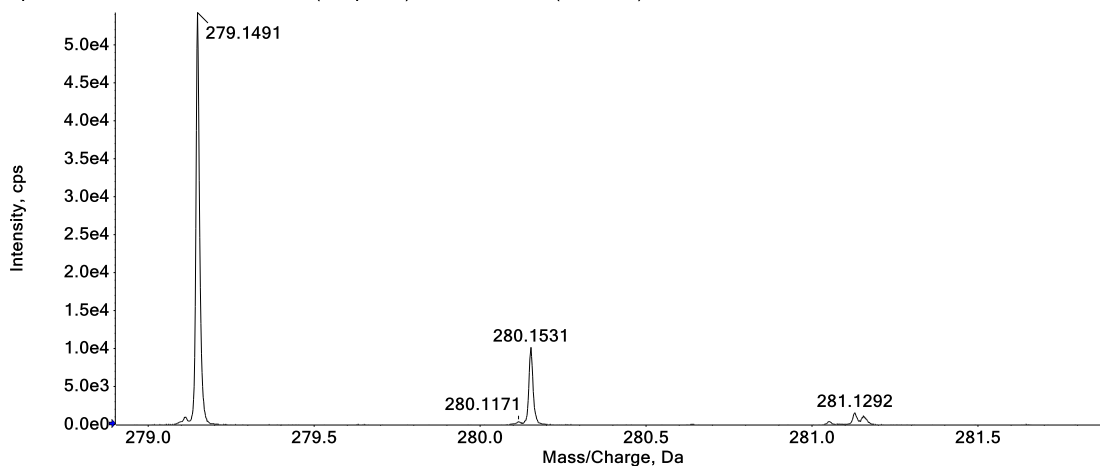

| Hit | Formula   | m/z      | RDB  | ppm  | MS Rank | MSMS ppm | MSMS Rank | Found |
|-----|-----------|----------|------|------|---------|----------|-----------|-------|
| 1   | C18H18N2O | 279.1492 | 11.0 | -0.3 | 1       |          |           | NA/NA |



## HR-MS spectrum of 3l

Spectrum from MASS20210609.wiff2 (sample 61) - Y14, +TOF MS (50 - 1000) from 0.132 to 0.167 min

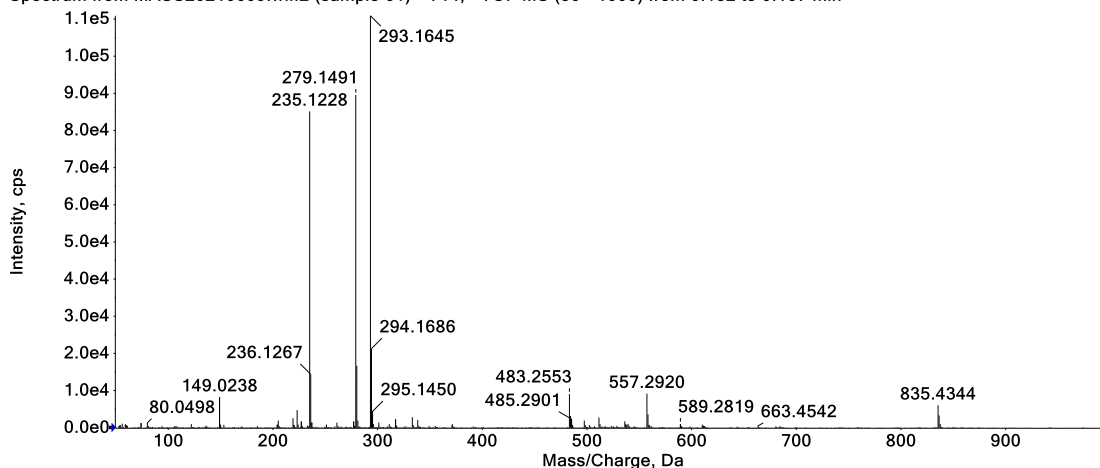

Spectrum from MASS20210609.wiff2 (sample 61) - Y14, +TOF MS (50 - 1000) from 0.132 to 0.167 min

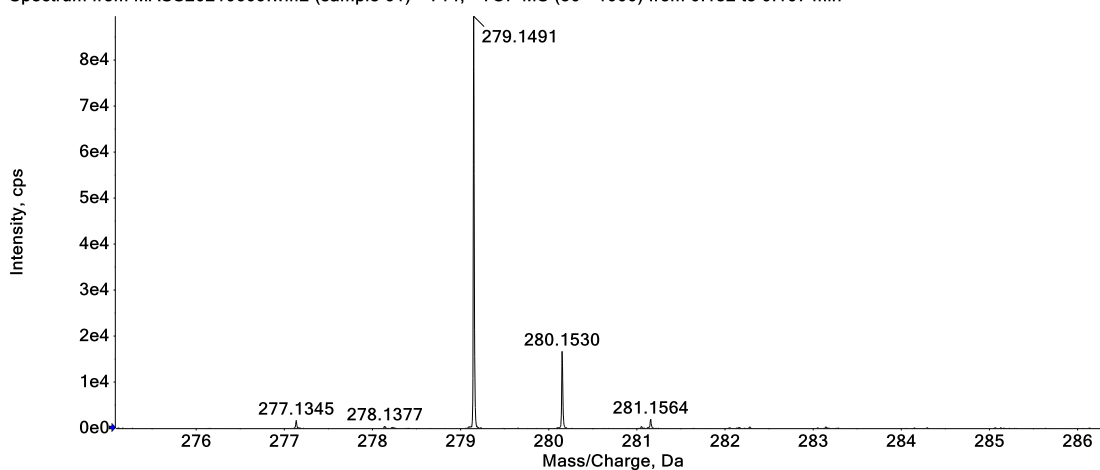

| Hit | Formula   | m/z      | RDB  | ppm  | MS Rank | MSMS ppm | MSMS Rank | Found |
|-----|-----------|----------|------|------|---------|----------|-----------|-------|
| 1   | C18H18N2O | 279.1492 | 11.0 | -0.3 | 1       |          |           | NA/NA |

## HR-MS spectrum of 3m

Spectrum from MASS20210609.wiff2 (sample 54) - Y7, +TOF MS (50 - 1000) from 0.132 to 0.167 min

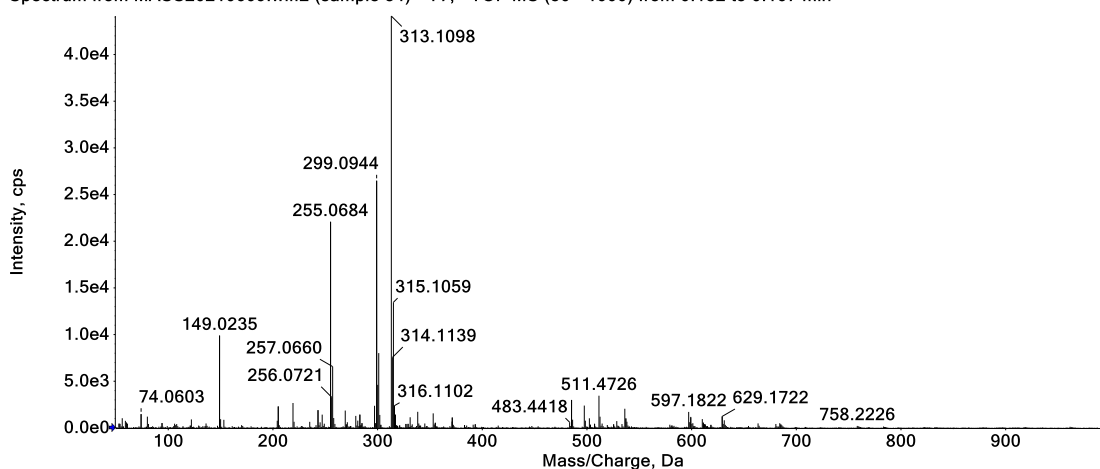

Spectrum from MASS20210609.wiff2 (sample 54) - Y7, +TOF MS (50 - 1000) from 0.132 to 0.167 min

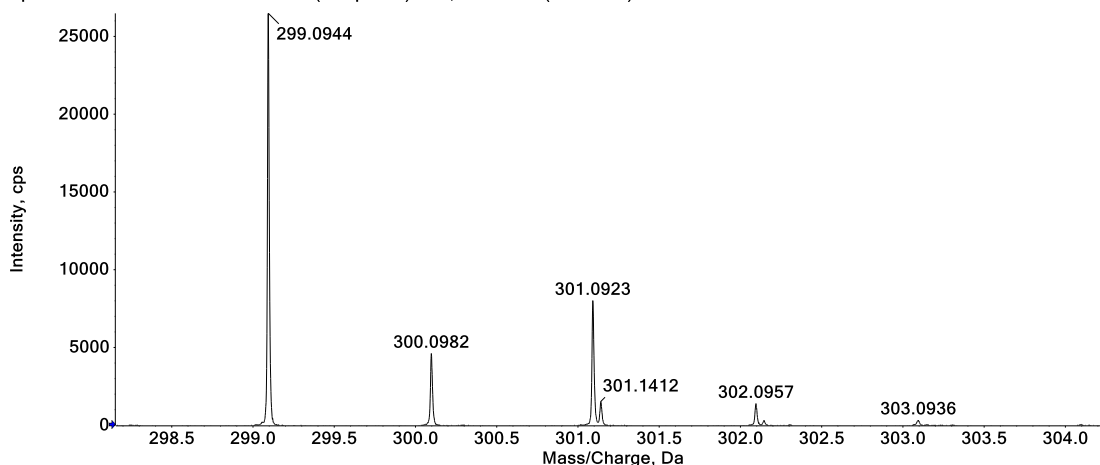

| Hit | Formula                                                         | m/z      | RDB  | ppm  | MS Rank | MSMS ppm | MSMS Rank | Found |
|-----|-----------------------------------------------------------------|----------|------|------|---------|----------|-----------|-------|
| 1   | C <sub>17</sub> H <sub>15</sub> C <sub>1</sub> N <sub>2</sub> O | 299.0946 | 11.0 | -0.6 | 1       |          |           | NA/NA |

## HR-MS spectrum of 3n

Spectrum from MASS20210609.wiff2 (sample 69) - Y22, +TOF MS (50 - 1000) from 0.079 to 0.114 min

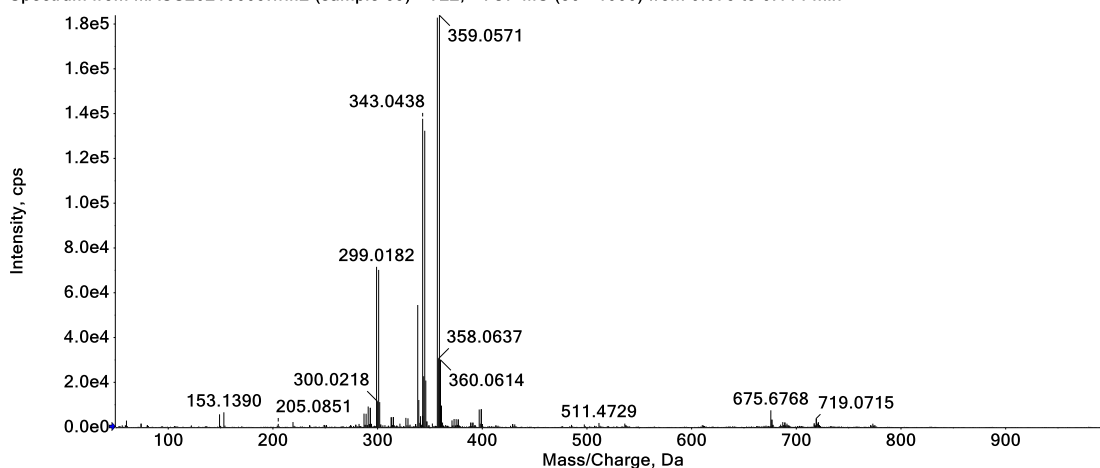

Spectrum from MASS20210609.wiff2 (sample 69) - Y22, +TOF MS (50 - 1000) from 0.079 to 0.114 min

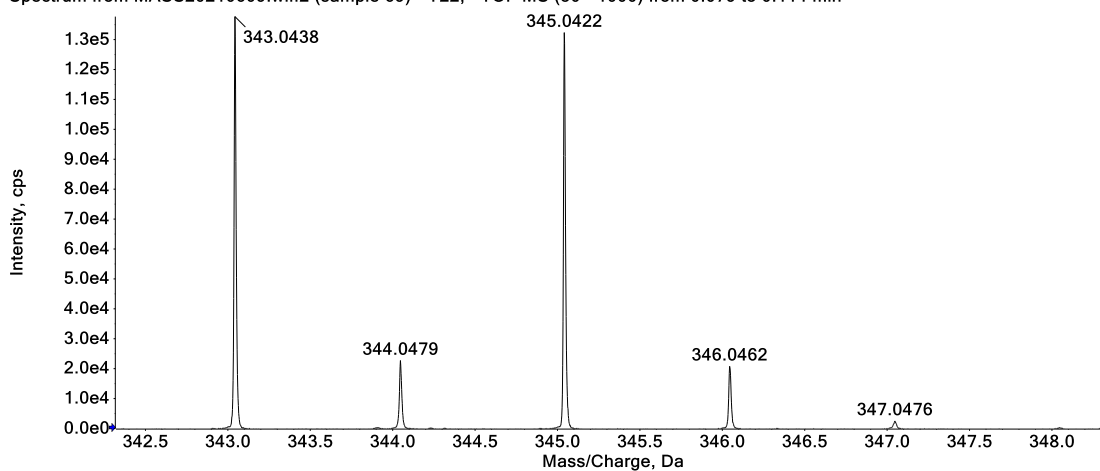

| Hit | Formula                                            | m/z      | RDB  | ppm  | MS Rank | MSMS ppm | MSMS Rank | Found |
|-----|----------------------------------------------------|----------|------|------|---------|----------|-----------|-------|
| 1   | C <sub>17</sub> H <sub>15</sub> BrN <sub>2</sub> O | 343.0441 | 11.0 | -0.7 | 1       |          |           | NA/NA |

## HR-MS spectrum of 3o

Spectrum from MASS20210609.wiff2 (sample 73) - Y26, +TOF MS (50 - 1000) from 0.079 to 0.114 min

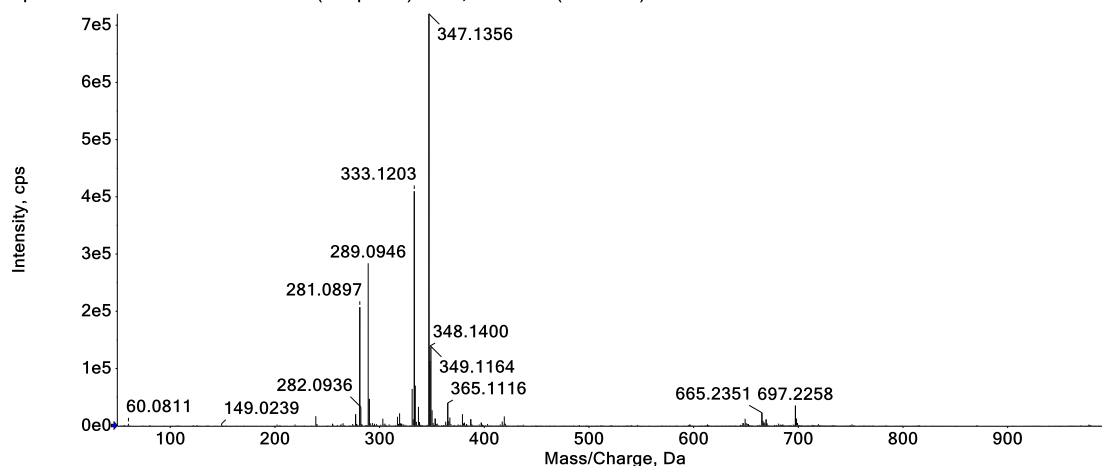

Spectrum from MASS20210609.wiff2 (sample 73) - Y26, +TOF MS (50 - 1000) from 0.079 to 0.114 min

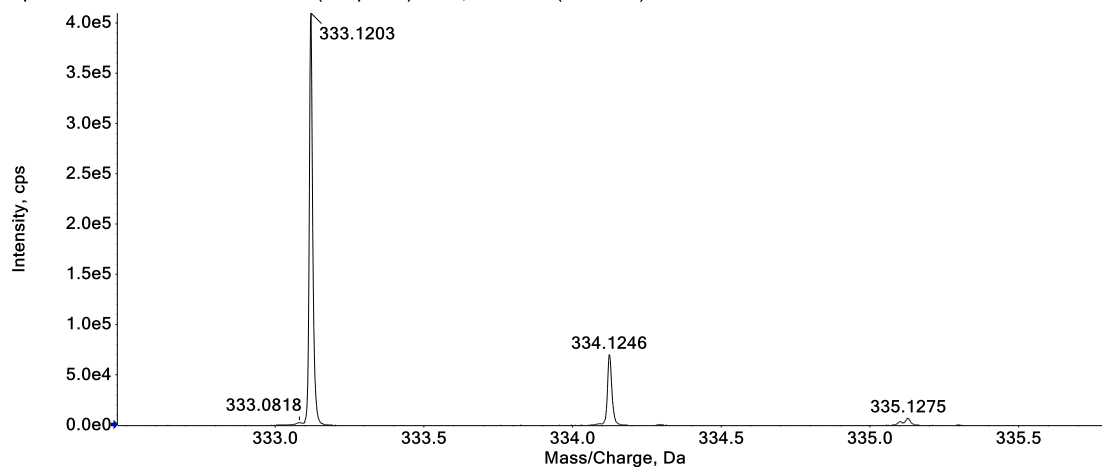

| Hit | Formula                                                         | m/z      | RDB  | ppm  | MS Rank | MSMS ppm | MSMS Rank | Found |
|-----|-----------------------------------------------------------------|----------|------|------|---------|----------|-----------|-------|
| 1   | C <sub>18</sub> H <sub>15</sub> F <sub>3</sub> N <sub>2</sub> O | 333.1209 | 11.0 | -1.9 | 1       |          |           | NA/NA |

## HR-MS spectrum of 3p

Spectrum from MASS202100707.wiff2 (sample 11) - Y11, +TOF MS (50 - 1000) from 0.158 to 0.193 min

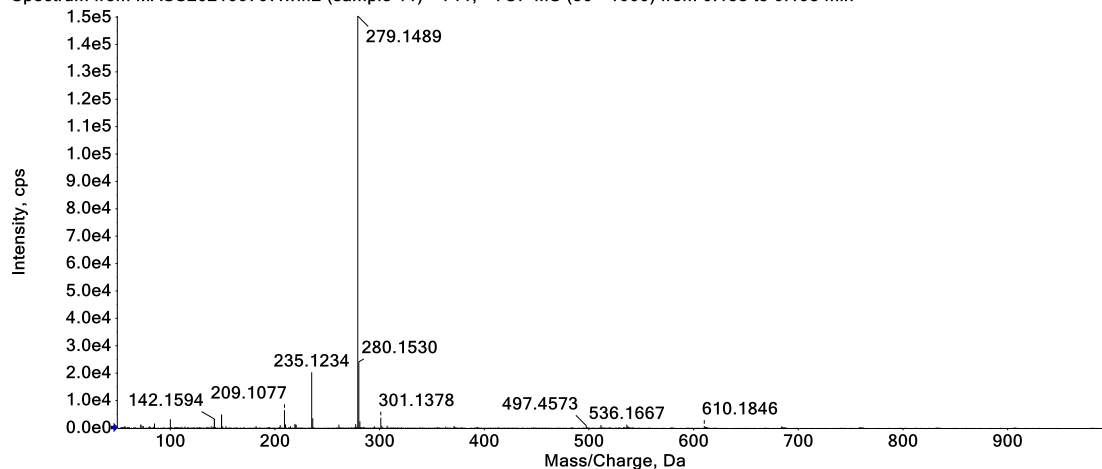

Spectrum from MASS202100707.wiff2 (sample 11) - Y11, +TOF MS (50 - 1000) from 0.158 to 0.193 min

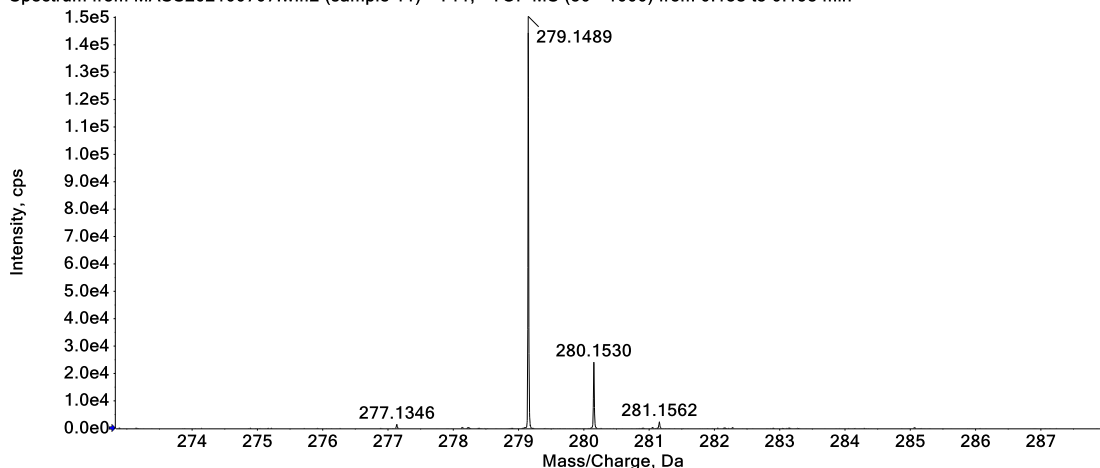

| Hit | Formula   | m/z      | RDB  | ppm  | MS Rank | MSMS ppm | MSMS Rank | Found |
|-----|-----------|----------|------|------|---------|----------|-----------|-------|
| 1   | C18H18N2O | 279.1492 | 11.0 | -1.0 | 1       |          |           | NA/NA |

### HR-MS spectrum of 3r

Spectrum from MASS20210609.wiff2 (sample 64) - Y17, +TOF MS (50 - 1000) from 0.228 to 0.378 min]

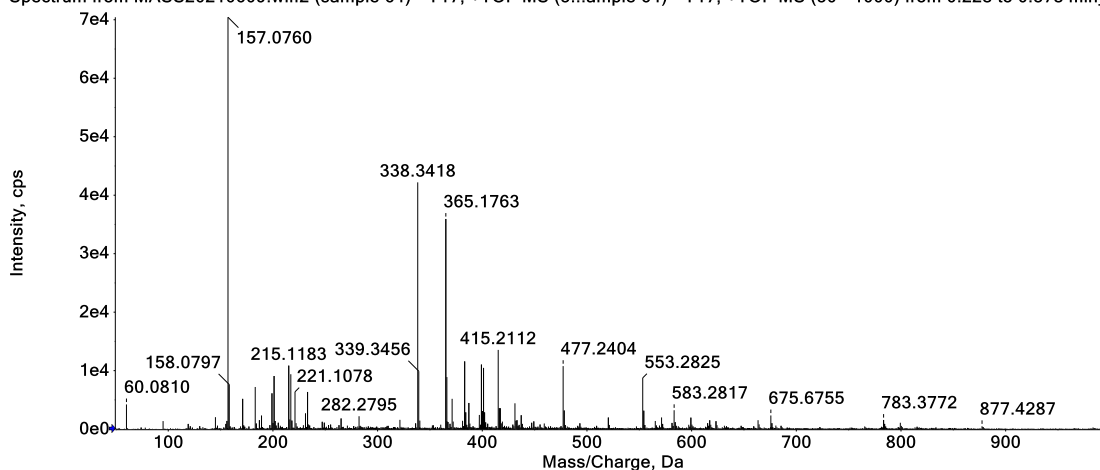

Spectrum from MASS20210609.wiff2 (sample 64) - Y17, +TOF MS (50 - 1000) from 0.228 to 0.378 min]

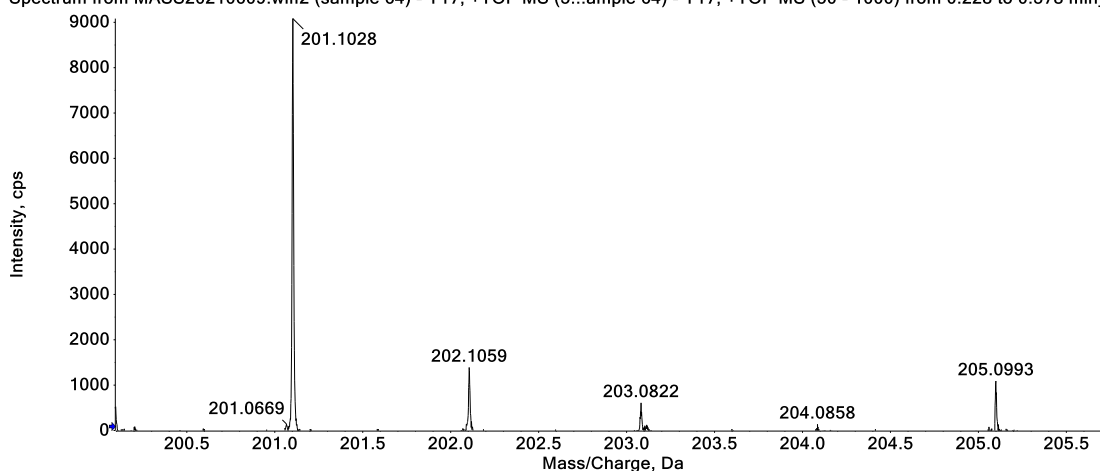

| Hit | Formula   | m/z      | RDB | ppm | MS Rank | MSMS ppm | MSMS Rank | Found |
|-----|-----------|----------|-----|-----|---------|----------|-----------|-------|
| 1   | C12H12N2O | 201.1022 | 8.0 | 2.8 | 1       |          |           | NA/NA |

HR-MS spectrum of 3u

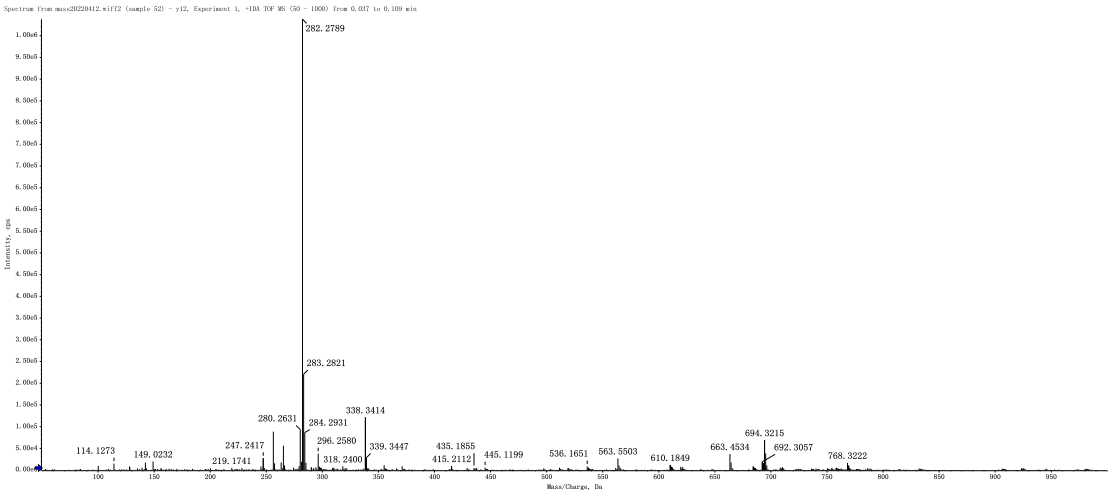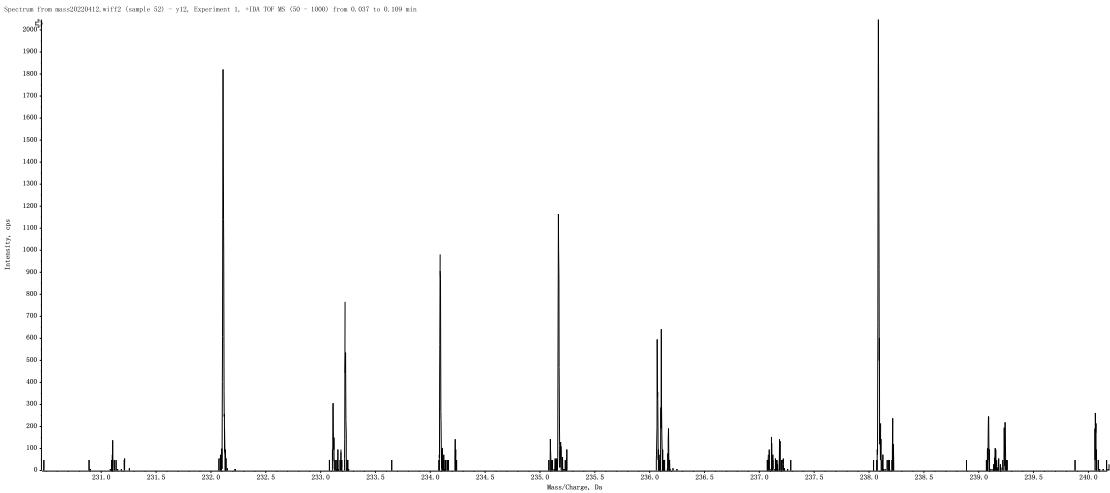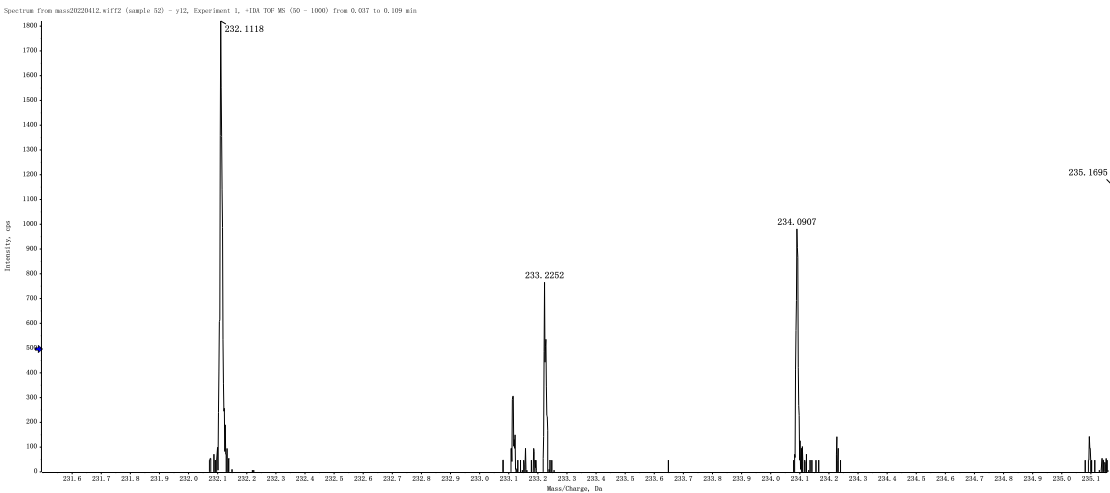

| Hit | Formula | m/z      | RDB  | ppm  | MS Rank | MSMS ppm | MSMS Rank | Found |
|-----|---------|----------|------|------|---------|----------|-----------|-------|
| 1   | C17H13N | 232.1121 | 12.0 | -1.2 | 1       |          |           | NA/NA |

## HR-MS spectrum of 4a

Spectrum from MASS20210609.wiff2 (sample 78) - Y31, +TOF MS (50 - 1000) from 0.079 to 0.114 min

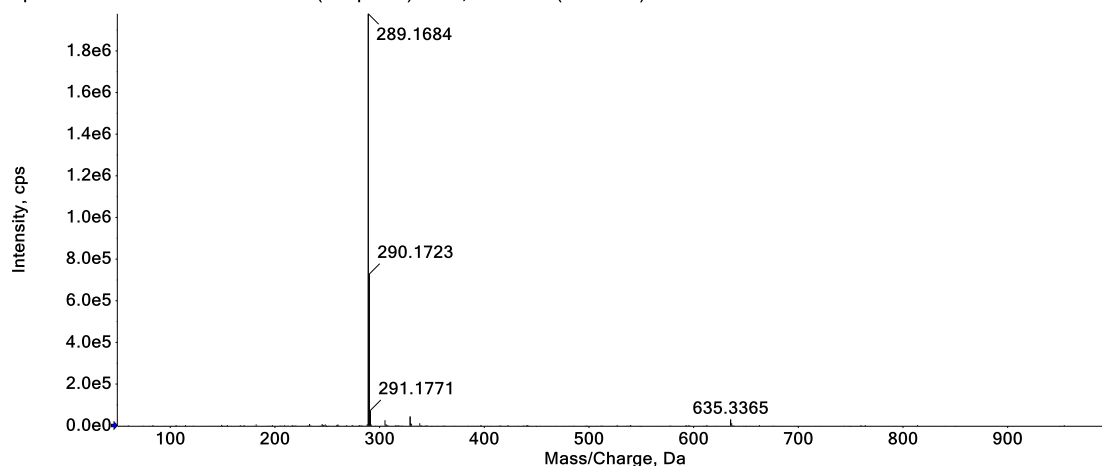

Spectrum from MASS20210609.wiff2 (sample 78) - Y31, +TOF MS (50 - 1000) from 0.079 to 0.114 min

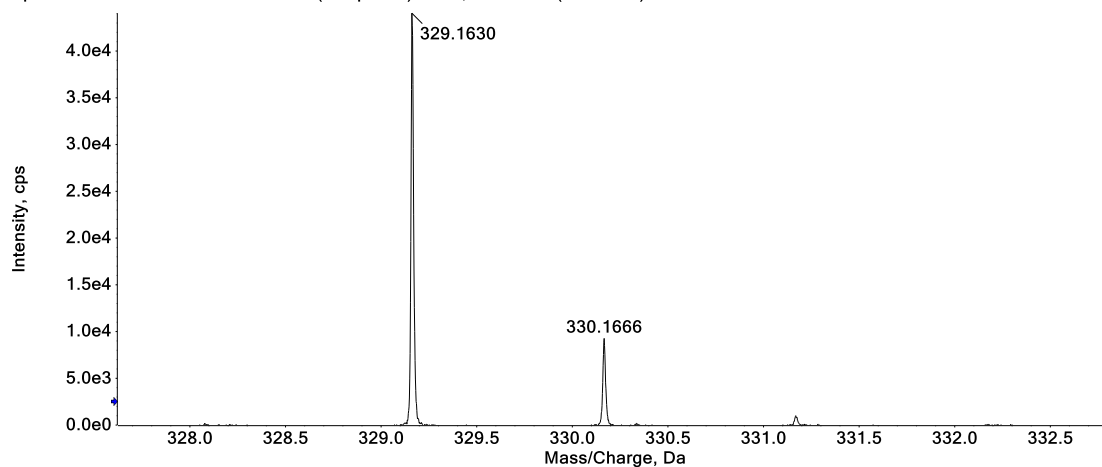

| Hit | Formula   | m/z      | RDB  | ppm | MS Rank | MSMS ppm | MSMS Rank | Found |
|-----|-----------|----------|------|-----|---------|----------|-----------|-------|
| 1   | C20H22N2O | 329.1624 | 11.0 | 1.7 | 1       |          |           | NA/NA |

## HR-MS spectrum of 4b

Spectrum from MASS20210609.wiff2 (sample 83) - Y36, +TOF MS (50 - 1000) from 0.140 to 0.176 min

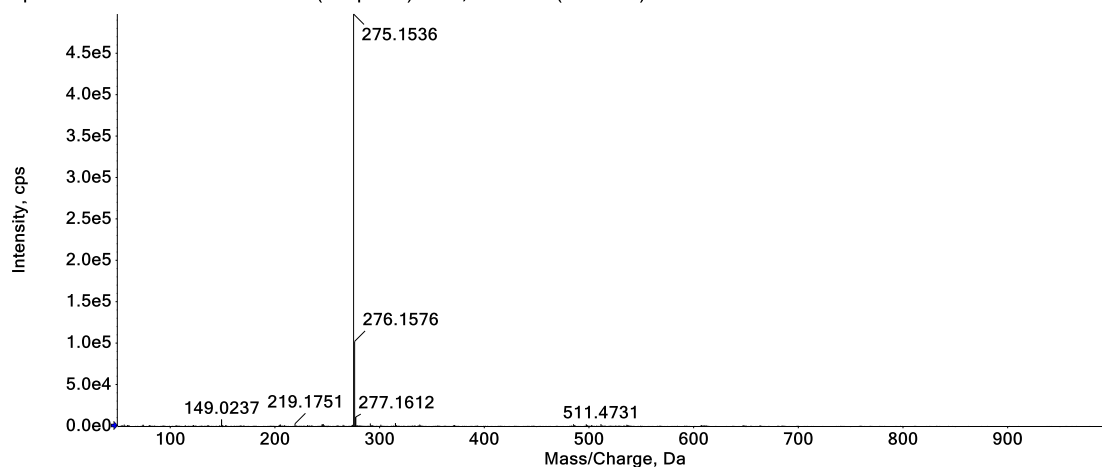

Spectrum from MASS20210609.wiff2 (sample 83) - Y36, +TOF MS (50 - 1000) from 0.140 to 0.176 min

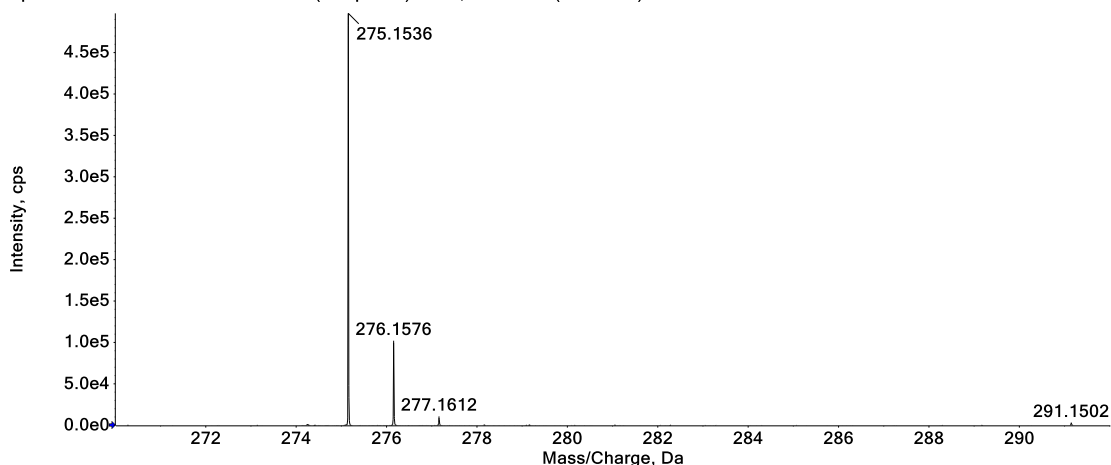

| Hit | Formula  | m/z      | RDB  | ppm  | MS Rank | MSMS ppm | MSMS Rank | Found |
|-----|----------|----------|------|------|---------|----------|-----------|-------|
| 1   | C19H18N2 | 275.1543 | 12.0 | -2.5 | 1       |          |           | NA/NA |

### HR-MS spectrum of 4c

Spectrum from MASS20210609.wiff2 (sample 86) - Y39, +TOF MS (50 - 1000) from 0.140 to 0.176 min

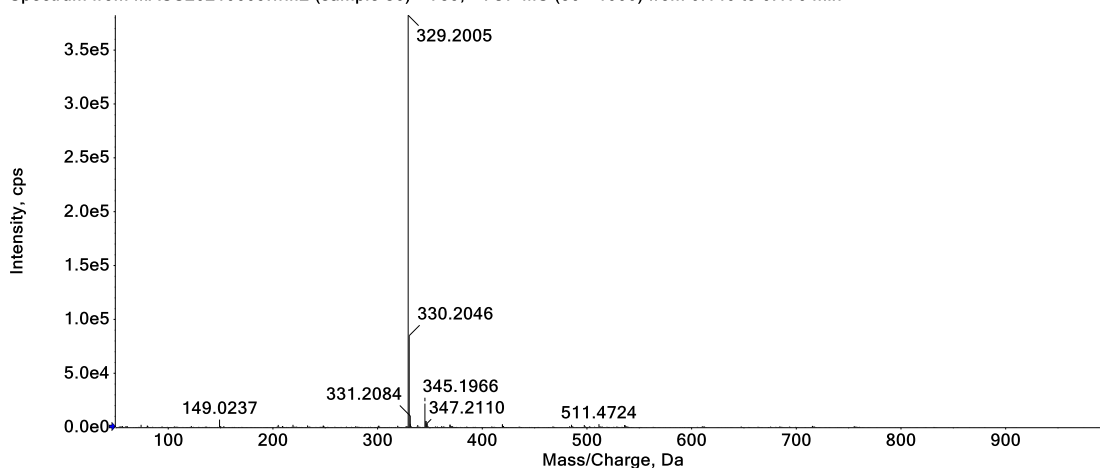

Spectrum from MASS20210609.wiff2 (sample 86) - Y39, +TOF MS (50 - 1000) from 0.140 to 0.176 min

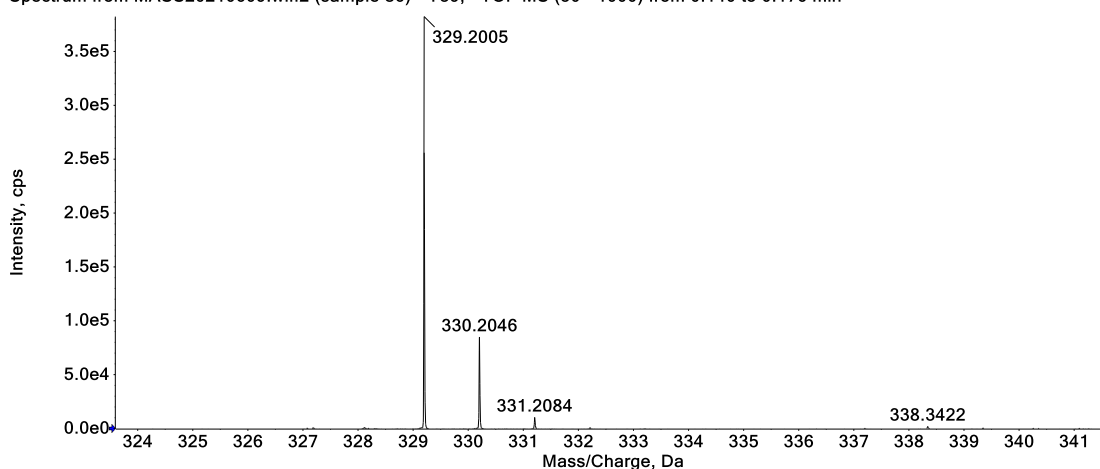

| Hit | Formula  | m/z      | RDB  | ppm  | MS Rank | MSMS ppm | MSMS Rank | Found |
|-----|----------|----------|------|------|---------|----------|-----------|-------|
| 1   | C23H24N2 | 329.2012 | 13.0 | -2.2 | 1       |          |           | NA/NA |

# HR-MS spectrum of 4d

Spectrum from MASS20210609.wiff2 (sample 80) - Y33, +TOF MS (50 - 1000) from 0.140 to 0.176 min

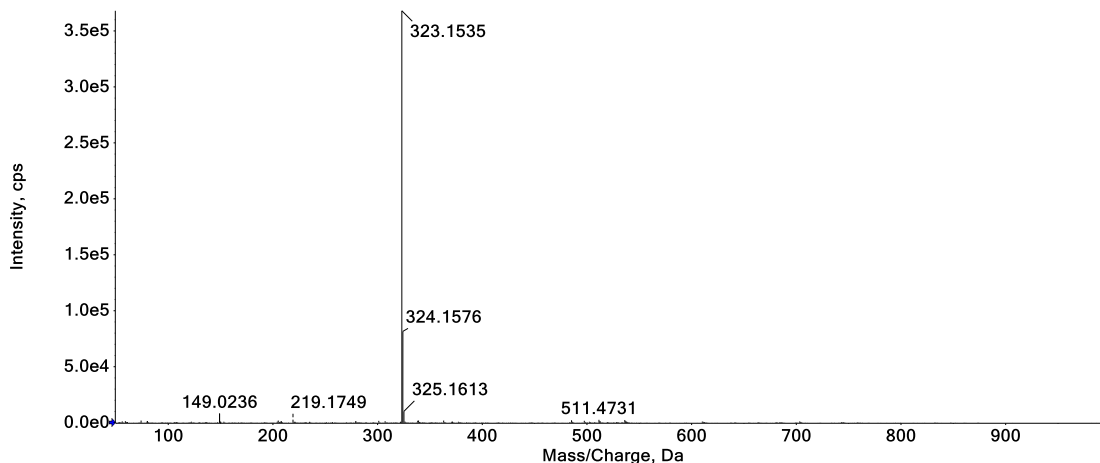

Spectrum from MASS20210609.wiff2 (sample 80) - Y33, +TOF MS (50 - 1000) from 0.140 to 0.176 min

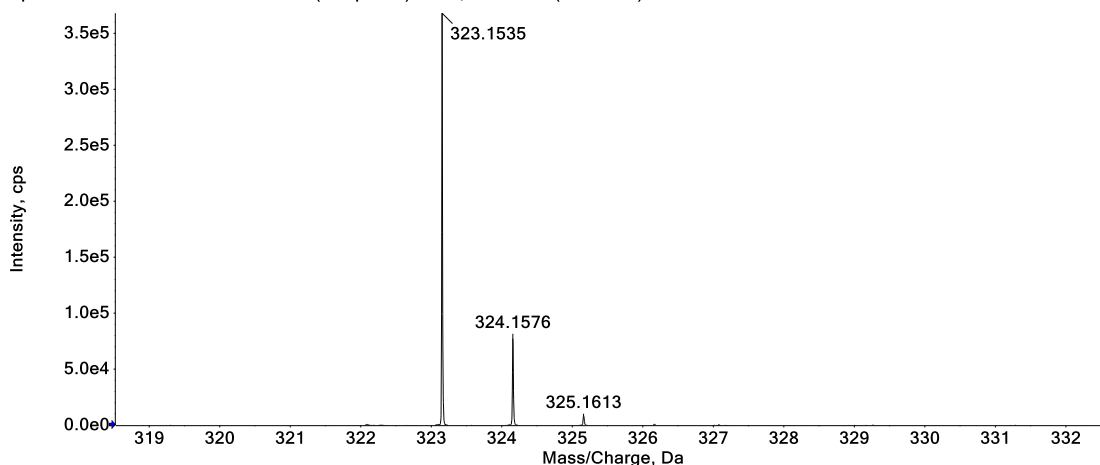

Spectrum from MASS20210609.wiff2 (sample 80) - Y33, +TOF MS (50 - 1000) from 0.140 to 0.176 min

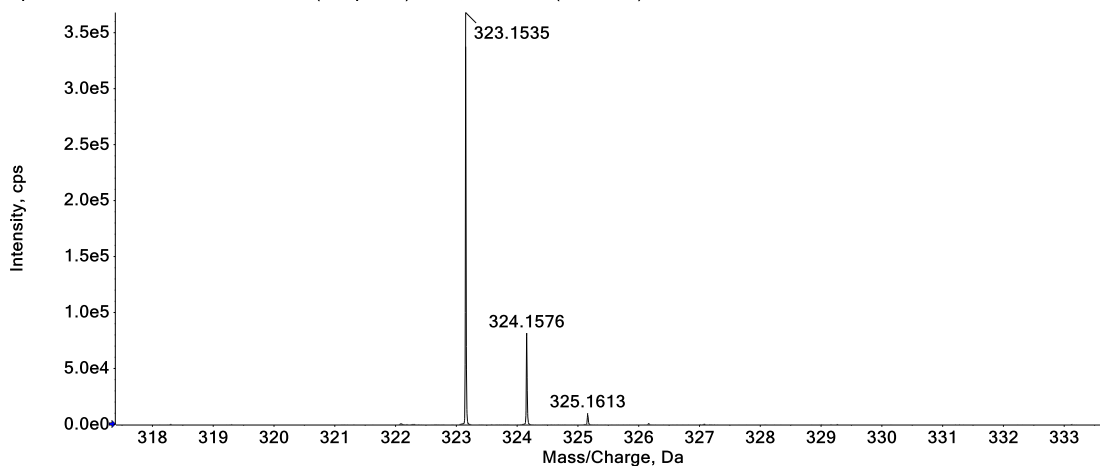

| Hit | Formula  | m/z      | RDB  | ppm  | MS Rank | MSMS ppm | MSMS Rank | Found |
|-----|----------|----------|------|------|---------|----------|-----------|-------|
| 1   | C23H18N2 | 323.1543 | 16.0 | -2.4 | 1       |          |           | NA/NA |



# HR-MS spectrum of 4e

Spectrum from MASS20210609.wiff2 (sample 89) - Y42, +TOF MS (50 - 1000) from 0.140 to 0.176 min

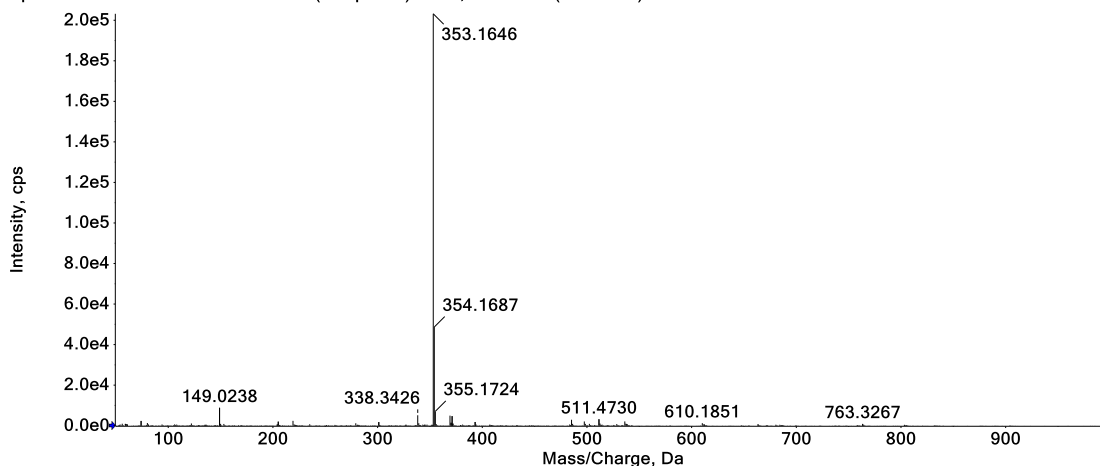

Spectrum from MASS20210609.wiff2 (sample 89) - Y42, +TOF MS (50 - 1000) from 0.140 to 0.176 min

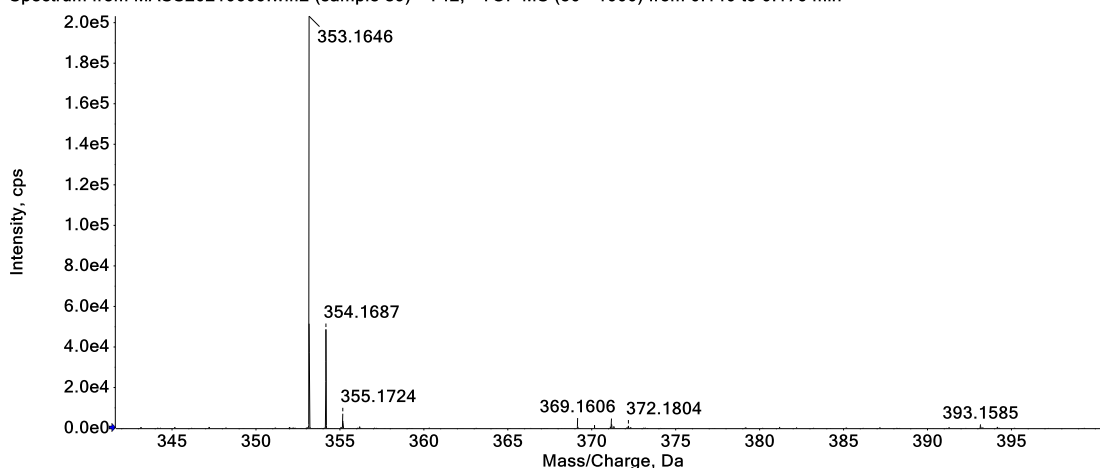

Spectrum from MASS20210609.wiff2 (sample 89) - Y42, +TOF MS (50 - 1000) from 0.140 to 0.176 min

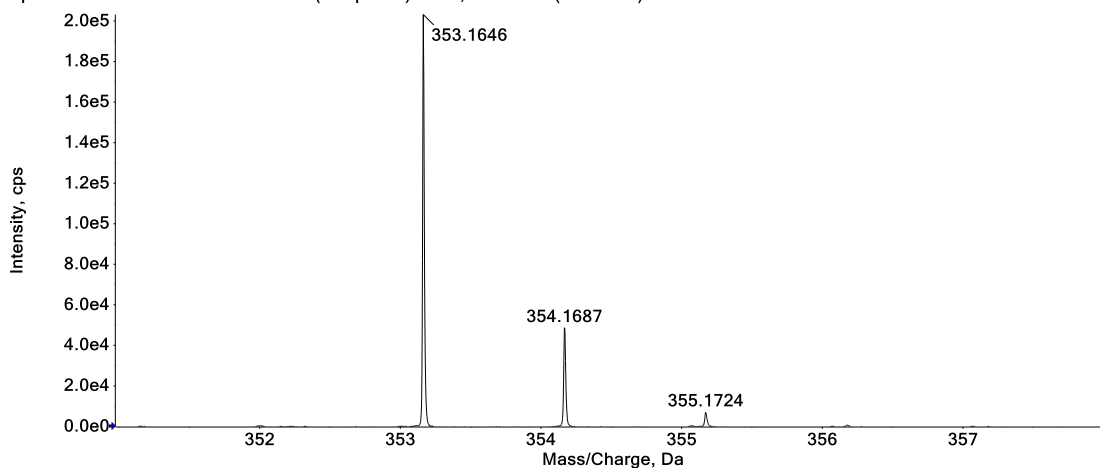

| Hit | Formula                                          | m/z      | RDB  | ppm  | MS Rank | MSMS ppm | MSMS Rank | Found |
|-----|--------------------------------------------------|----------|------|------|---------|----------|-----------|-------|
| 1   | C <sub>24</sub> H <sub>20</sub> N <sub>2</sub> O | 353.1648 | 16.0 | -0.7 | 1       |          |           | NA/NA |

## HR-MS spectrum of 4f

Spectrum from MASS20210609.wiff2 (sample 92) - Y45, +TOF MS (50 - 1000) from 0.140 to 0.176 min

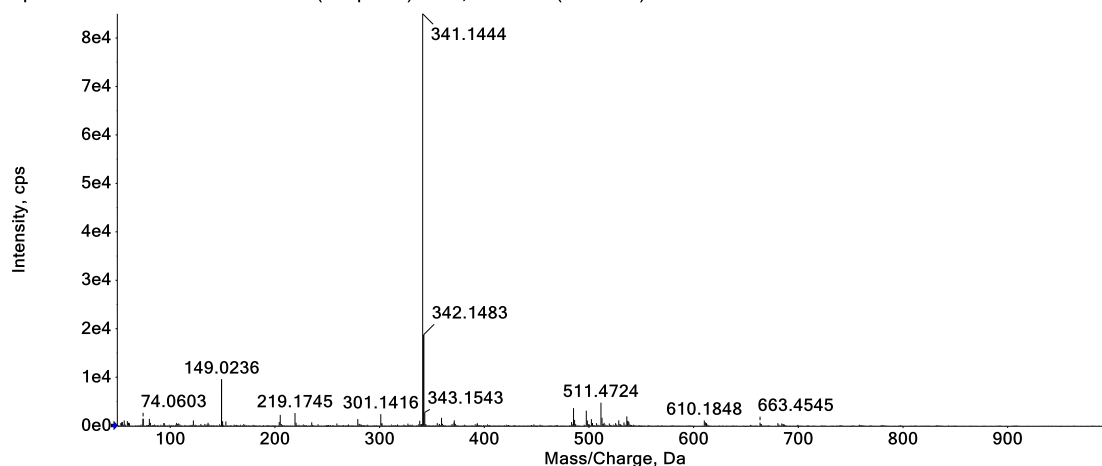

Spectrum from MASS20210609.wiff2 (sample 92) - Y45, +TOF MS (50 - 1000) from 0.140 to 0.176 min

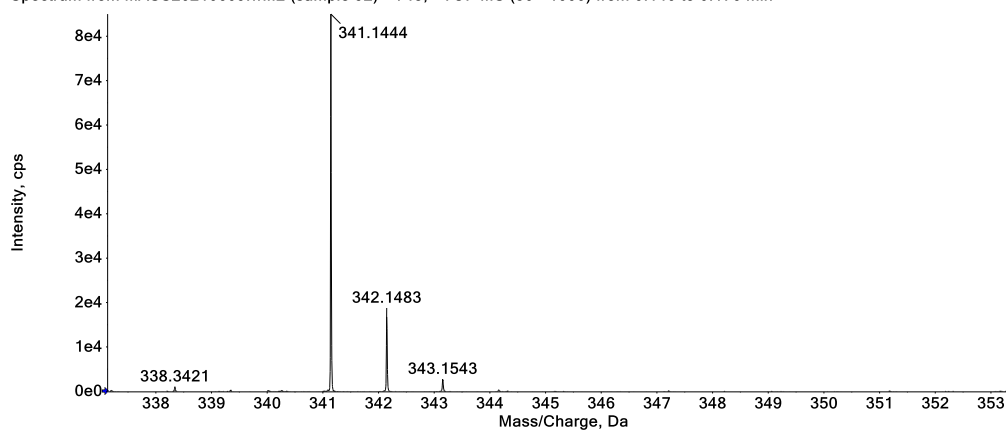

| Hit | Formula   | m/z      | RDB  | ppm  | MS Rank | MSMS ppm | MSMS Rank | Found |
|-----|-----------|----------|------|------|---------|----------|-----------|-------|
| 1   | C23H17FN2 | 341.1449 | 16.0 | -1.3 | 1       |          |           | NA/NA |

## HR-MS spectrum of 4g

Spectrum from MASS20220928.wiff2 (sample 4) - Y3, Experiment 1, +HDA TOF MS (50 - 1000) from 0.046 to 0.072 min

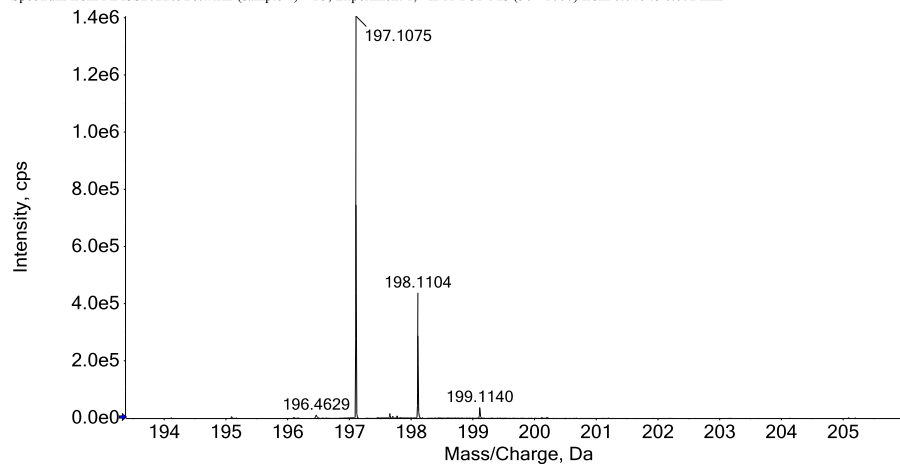

| Hit | Formula  | m/z      | RDB | ppm | MS Rank | MSMS ppm | MSMS Rank | Found |
|-----|----------|----------|-----|-----|---------|----------|-----------|-------|
| 1   | C13H12N2 | 197.1073 | 9.0 | 0.9 | 1       |          |           | NA/NA |

## HR-MS spectrum of 4h

Spectrum from MASS20220928.wiff2 (sample 5) - Y4, Experiment 1, +IDA TOF MS (50 - 1000) from 0.047 to 0.072 min

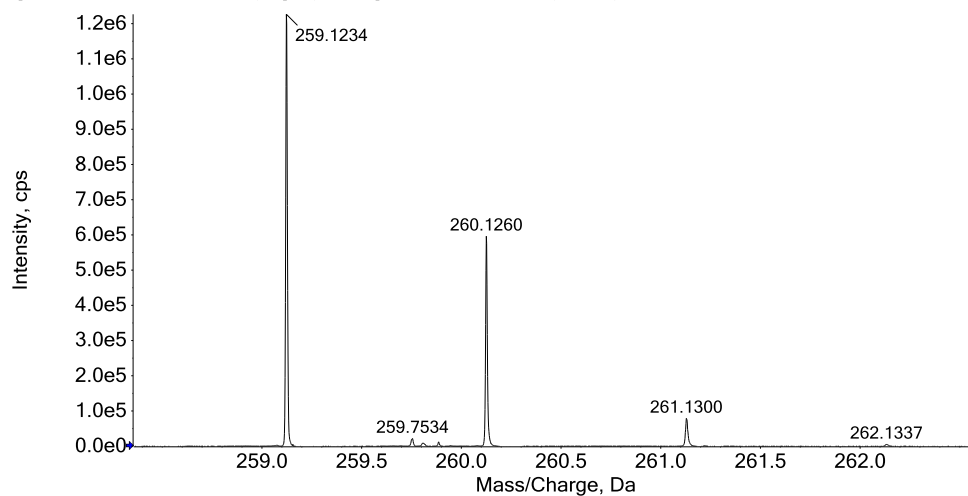

| Hit | Formula  | m/z      | RDB  | ppm | MS Rank | MSMS ppm | MSMS Rank | Found |
|-----|----------|----------|------|-----|---------|----------|-----------|-------|
| 1   | C18H14N2 | 259.1230 | 13.0 | 1.6 | 1       |          |           | NA/NA |

## HR-MS spectrum of 4i

Spectrum from MASS20220928.wiff2 (sample 6) - Y5, Experiment 1, +IDA TOF MS (50 - 1000) from 0.046 to 0.072 min

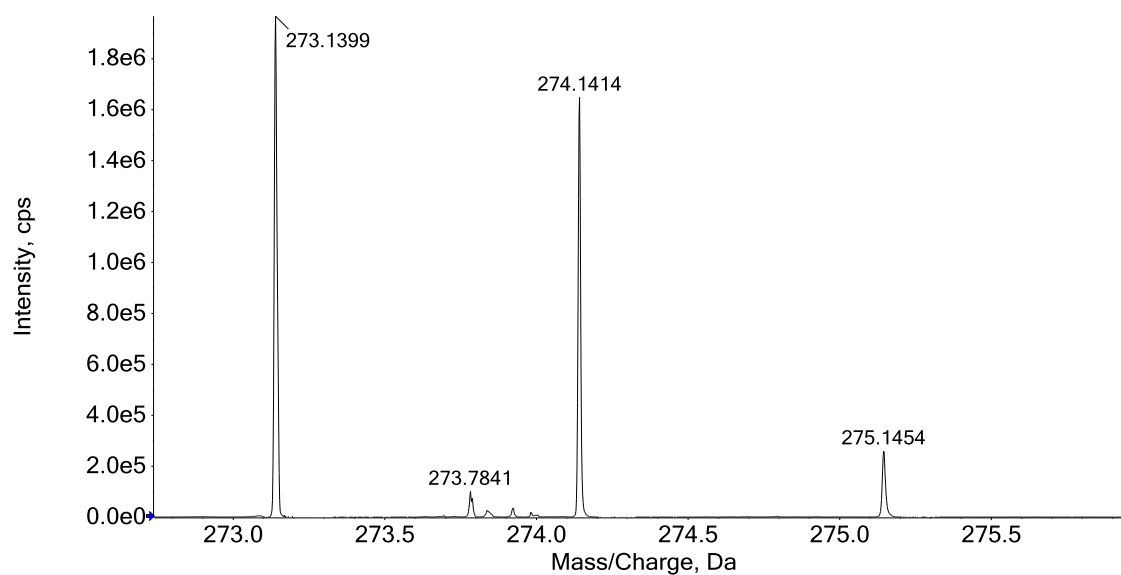

| Hit | Formula  | m/z      | RDB  | ppm | MS Rank | MSMS ppm | MSMS Rank | Found |
|-----|----------|----------|------|-----|---------|----------|-----------|-------|
| 1   | C19H16N2 | 273.1386 | 13.0 | 4.7 | 1       |          |           | NA/NA |

HR-MS spectrum of 4j

Spectrum from MASS20220928.wiff2 (sample 7) - Y6, Experiment 1, +IDA TOF MS (50 - 1000) from 0.045 to 0.073 min

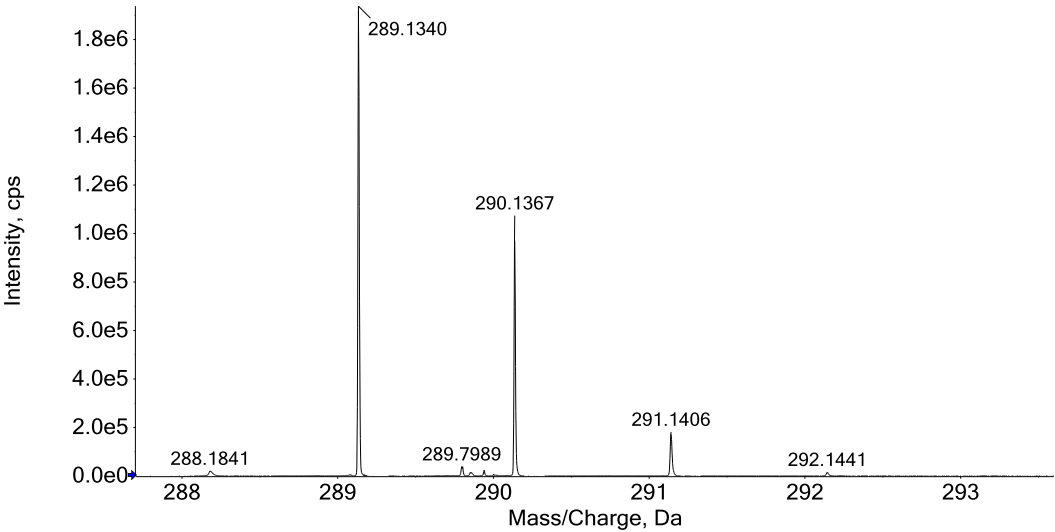

| Hit | Formula   | m/z      | RDB  | ppm | MS Rank | MSMS ppm | MSMS Rank | Found |
|-----|-----------|----------|------|-----|---------|----------|-----------|-------|
| 1   | C19H16N2O | 289.1335 | 13.0 | 1.6 | 1       |          |           | NA/NA |

HR-MS spectrum of 4k

Spectrum from MASS20220928.wiff2 (sample 8) - Y7, Experiment 1, +IDA TOF MS (50 - 1000) from 0.046 to 0.072 min

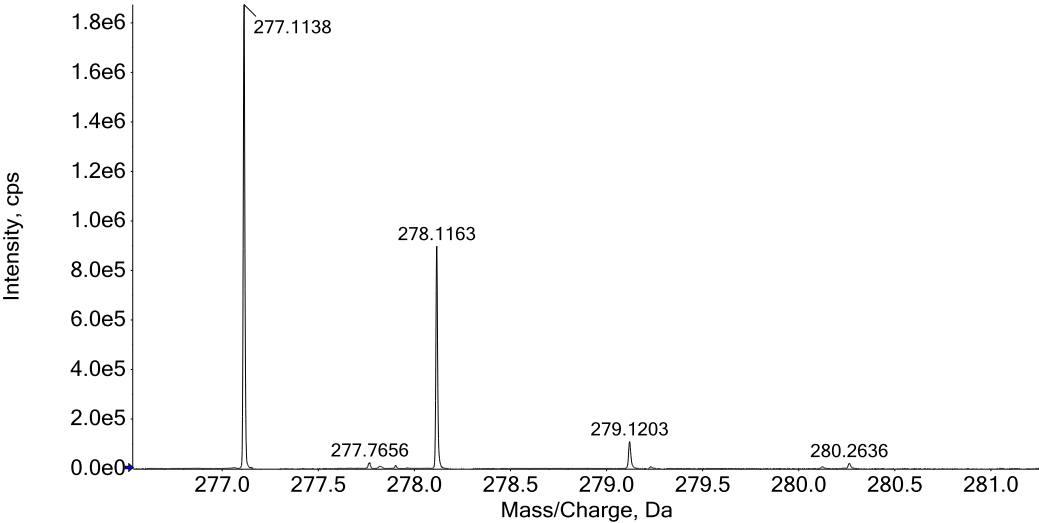

| Hit | Formula   | m/z      | RDB  | ppm | MS Rank | MSMS ppm | MSMS Rank | Found |
|-----|-----------|----------|------|-----|---------|----------|-----------|-------|
| 1   | C18H13FN2 | 277.1136 | 13.0 | 0.9 | 1       |          |           | NA/NA |

## HR-MS spectrum of 4l

Spectrum from MASS202100707.wiff2 (sample 5) - Y5, +TOF MS (50 - 1000) from 0.158 to 0.193 min

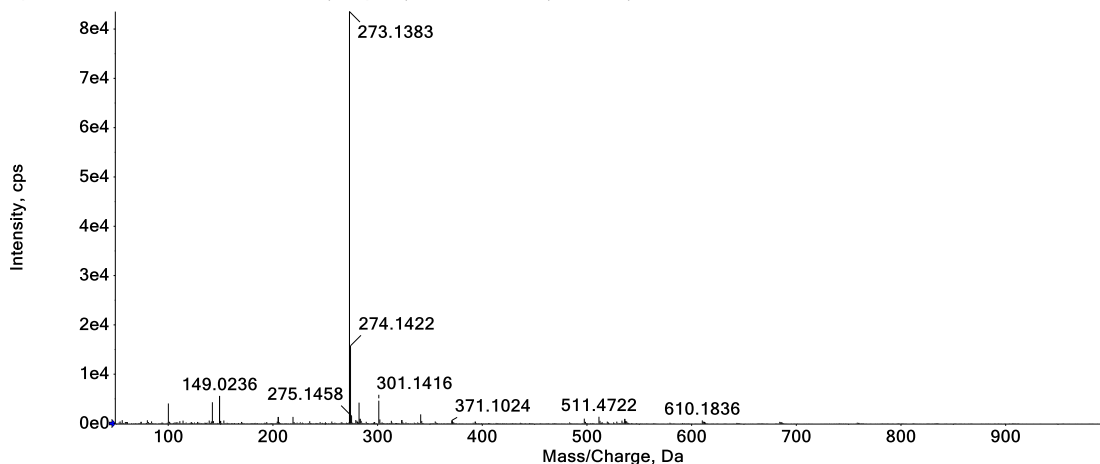

Spectrum from MASS202100707.wiff2 (sample 5) - Y5, +TOF MS (50 - 1000) from 0.158 to 0.193 min

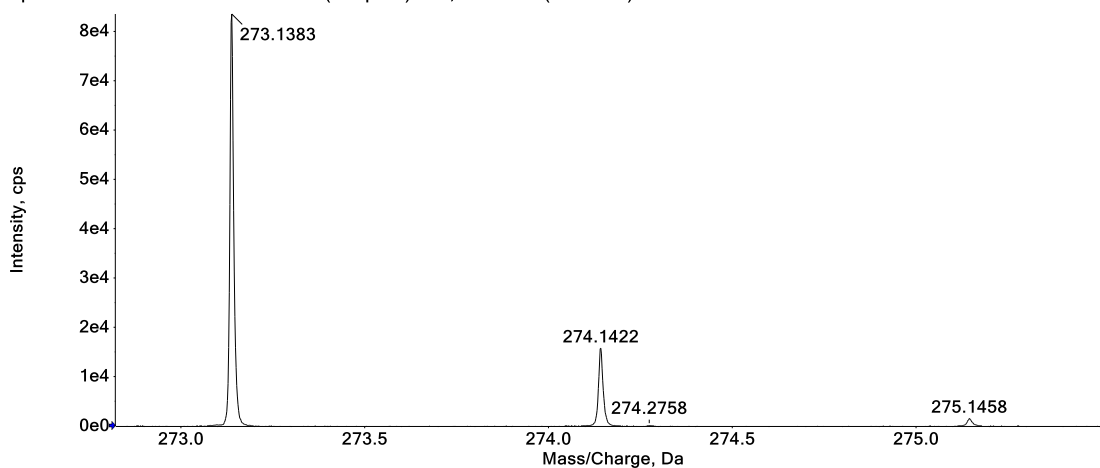

| Hit | Formula  | m/z      | RDB  | ppm  | MS Rank | MSMS ppm | MSMS Rank | Found |
|-----|----------|----------|------|------|---------|----------|-----------|-------|
| 1   | C19H16N2 | 273.1386 | 13.0 | -1.2 | 1       |          |           | NA/NA |

## HR-MS spectrum of 4m

Spectrum from MASS20210609.wiff2 (sample 55) - Y8, +TOF MS (50 - 1000) from 0.132 to 0.167 min

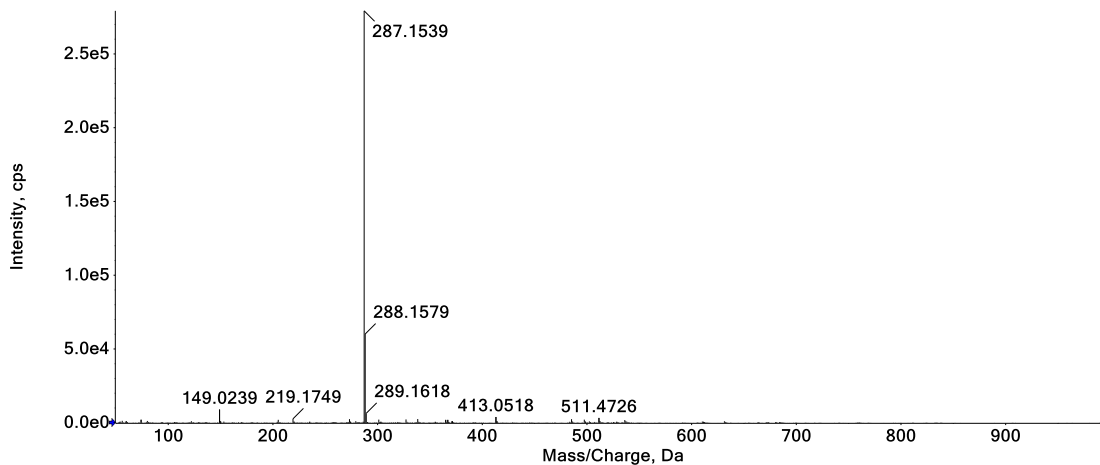

Spectrum from MASS20210609.wiff2 (sample 55) - Y8, +TOF MS (50 - 1000) from 0.132 to 0.167 min

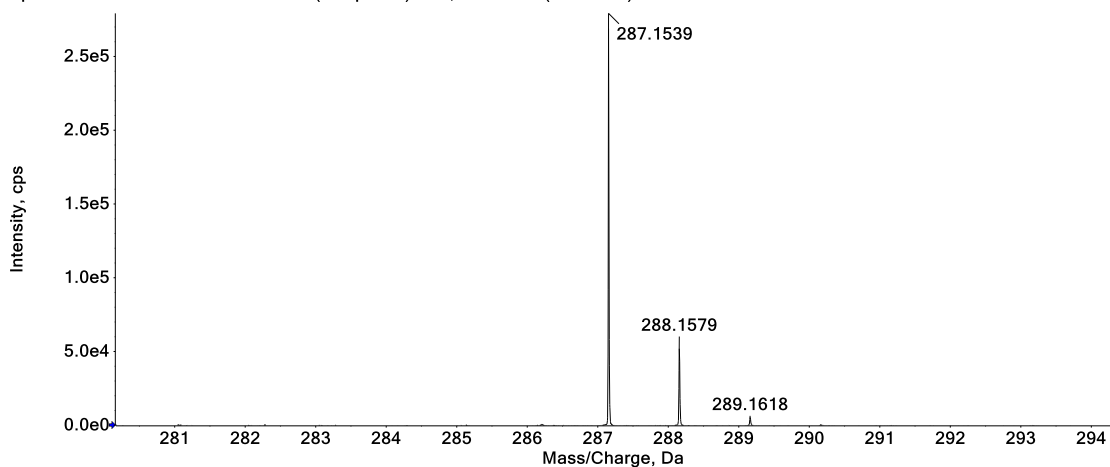

Spectrum from MASS20210609.wiff2 (sample 55) - Y8, +TOF MS (50 - 1000) from 0.132 to 0.167 min

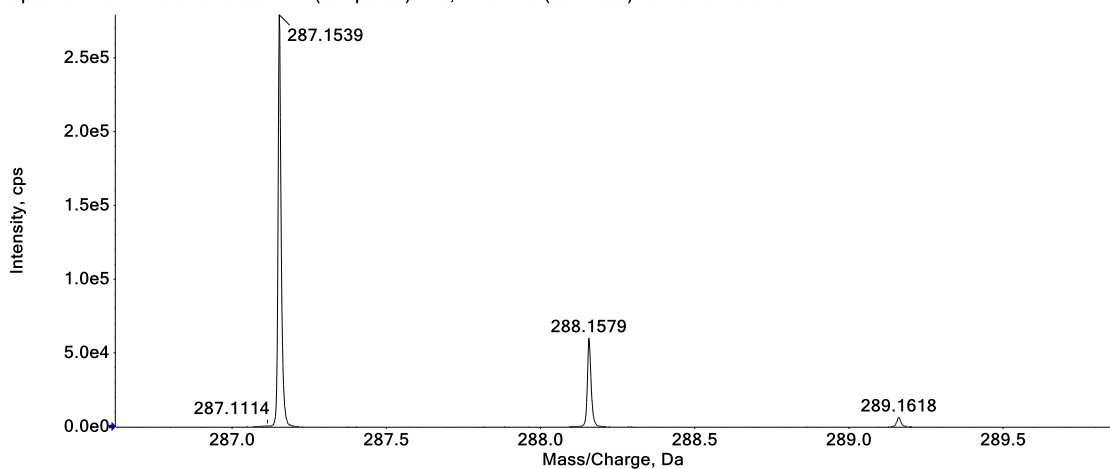

| Hit | Formula  | m/z      | RDB  | ppm  | MS Rank | MSMS ppm | MSMS Rank | Found |
|-----|----------|----------|------|------|---------|----------|-----------|-------|
| 1   | C20H18N2 | 287.1543 | 13.0 | -1.3 | 1       |          |           | NA/NA |

## HR-MS spectrum of 5a

Spectrum from MASS20210609.wiff2 (sample 79) - Y32, +TOF MS (50 - 1000) from 0.079 to 0.114 min

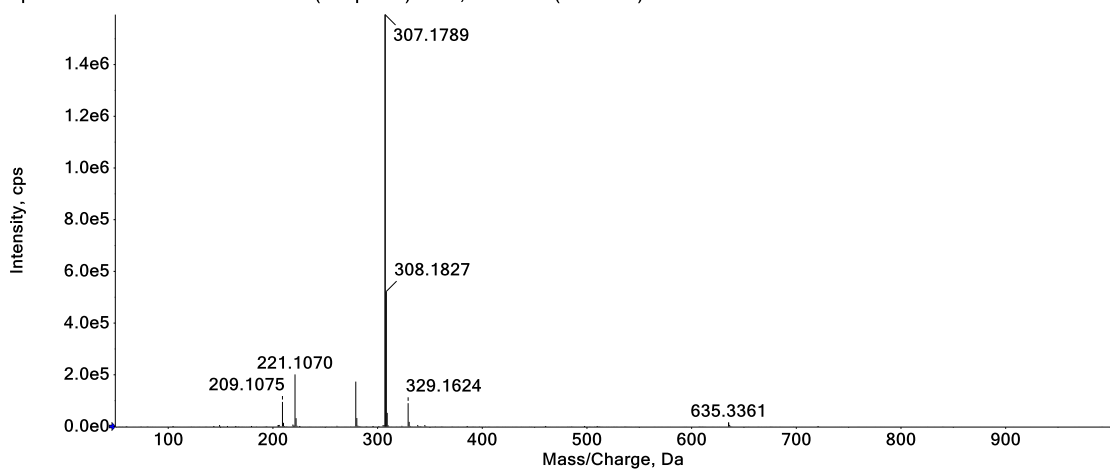

Spectrum from MASS20210609.wiff2 (sample 79) - Y32, +TOF MS (50 - 1000) from 0.079 to 0.114 min

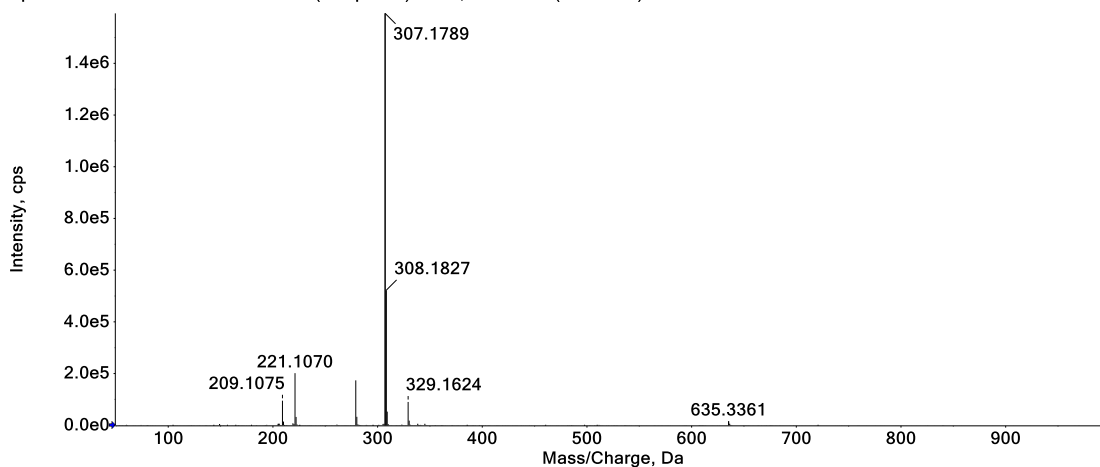

Spectrum from MASS20210609.wiff2 (sample 79) - Y32, +TOF MS (50 - 1000) from 0.079 to 0.114 min

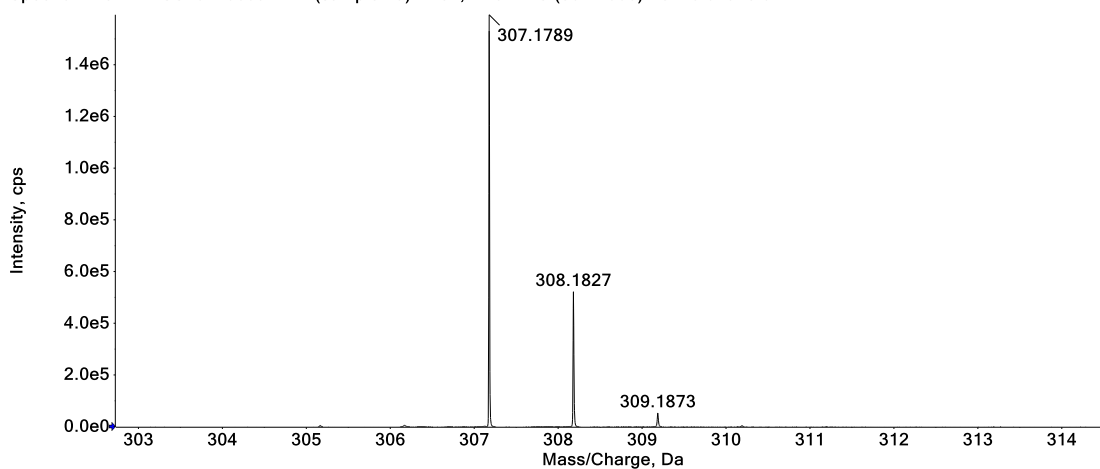

| Hit | Formula   | m/z      | RDB  | ppm  | MS Rank | MSMS ppm | MSMS Rank | Found |
|-----|-----------|----------|------|------|---------|----------|-----------|-------|
| 1   | C20H22N2O | 307.1805 | 11.0 | -0.9 | 1       |          |           | NA/NA |

## HR-MS spectrum of 5b

Spectrum from MASS20210609.wiff2 (sample 84) - Y37, +TOF MS (50 - 1000) from 0.140 to 0.176 min

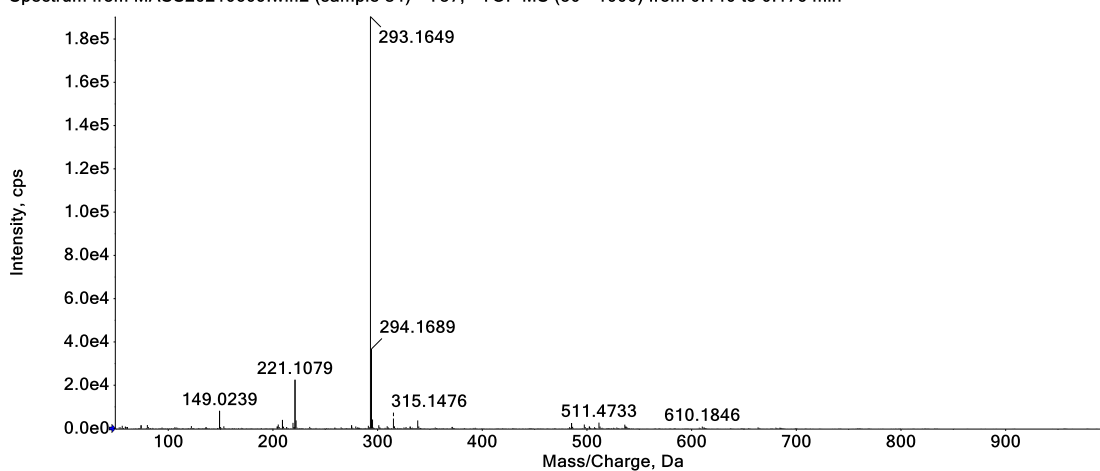

Spectrum from MASS20210609.wiff2 (sample 84) - Y37, +TOF MS (50 - 1000) from 0.140 to 0.176 min

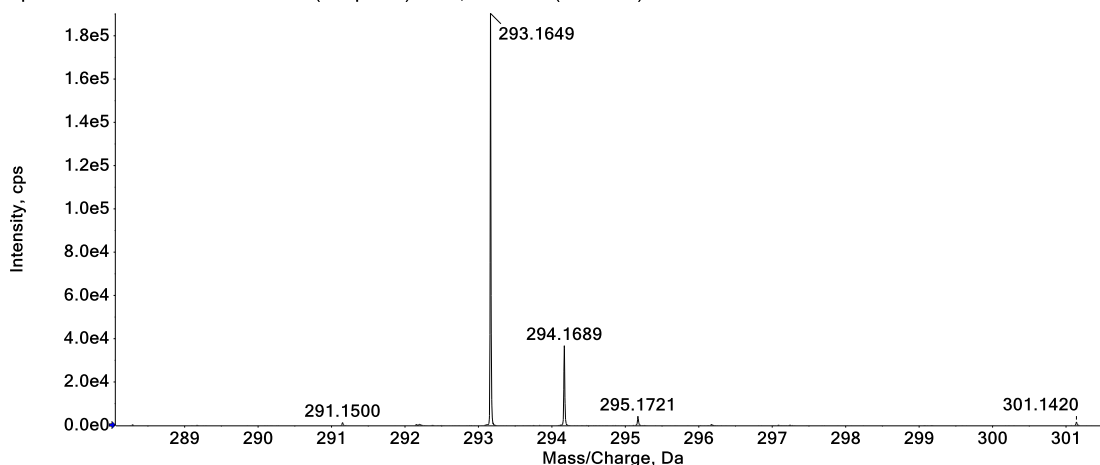

| Hit | Formula                                          | m/z      | RDB  | ppm | MS Rank | MSMS ppm | MSMS Rank | Found |
|-----|--------------------------------------------------|----------|------|-----|---------|----------|-----------|-------|
| 1   | C <sub>19</sub> H <sub>20</sub> N <sub>2</sub> O | 293.1648 | 11.0 | 0.2 | 1       |          |           | NA/NA |

## HR-MS spectrum of 5c

Spectrum from MASS20210609.wiff2 (sample 87) - Y40, +TOF MS (50 - 1000) from 0.140 to 0.176 min

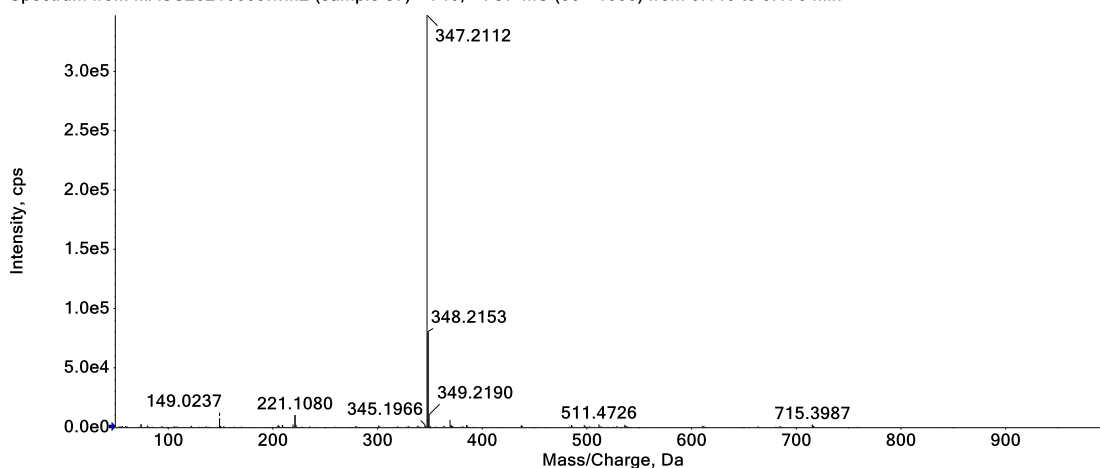

Spectrum from MASS20210609.wiff2 (sample 87) - Y40, +TOF MS (50 - 1000) from 0.140 to 0.176 min

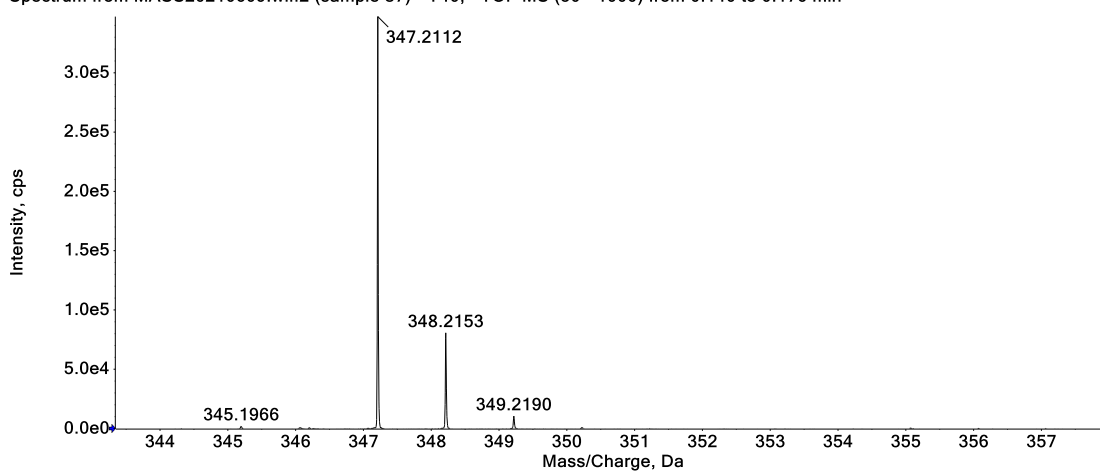

| Hit | Formula                                          | m/z      | RDB  | ppm  | MS Rank | MSMS ppm | MSMS Rank | Found |
|-----|--------------------------------------------------|----------|------|------|---------|----------|-----------|-------|
| 1   | C <sub>23</sub> H <sub>26</sub> N <sub>2</sub> O | 347.2118 | 12.0 | -1.7 | 1       |          |           | NA/NA |



## HR-MS spectrum of 5d

Spectrum from MASS20210609.wiff2 (sample 81) - Y34, +TOF MS (50 - 1000) from 0.140 to 0.176 min

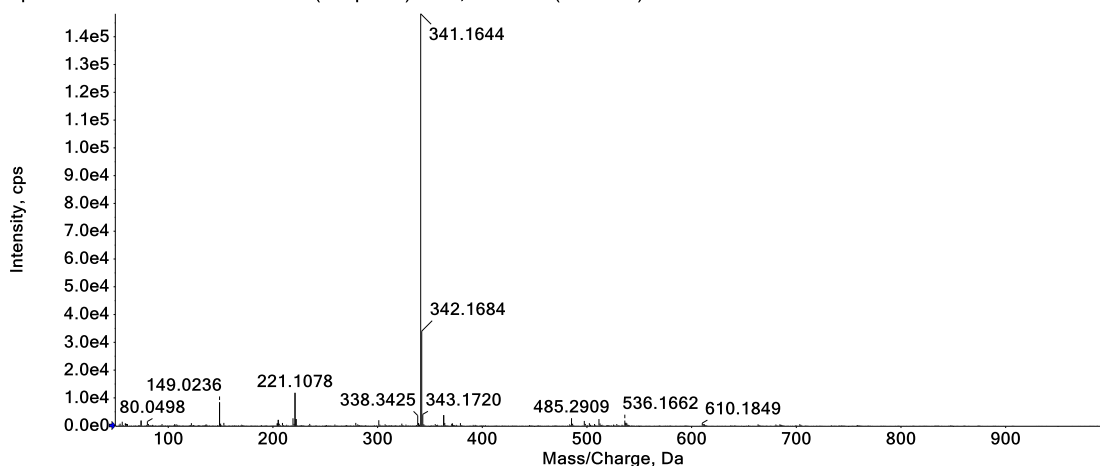

Spectrum from MASS20210609.wiff2 (sample 81) - Y34, +TOF MS (50 - 1000) from 0.140 to 0.176 min

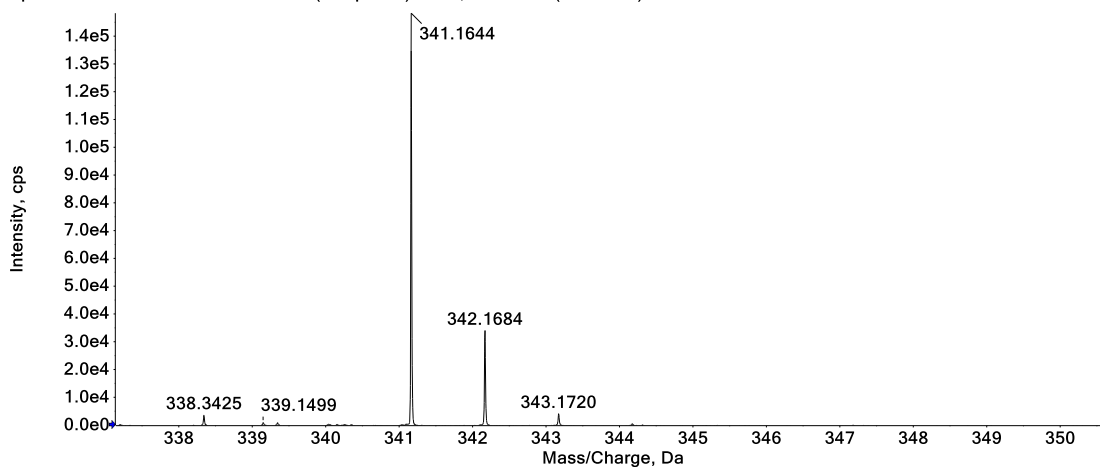

| Hit | Formula   | m/z      | RDB  | ppm  | MS Rank | MSMS ppm | MSMS Rank | Found |
|-----|-----------|----------|------|------|---------|----------|-----------|-------|
| 1   | C23H20N2O | 341.1648 | 15.0 | -1.3 | 1       |          |           | NA/NA |

## HR-MS spectrum of 5e

Spectrum from MASS20210609.wiff2 (sample 90) - Y43, +TOF MS (50 - 1000) from 0.140 to 0.176 min

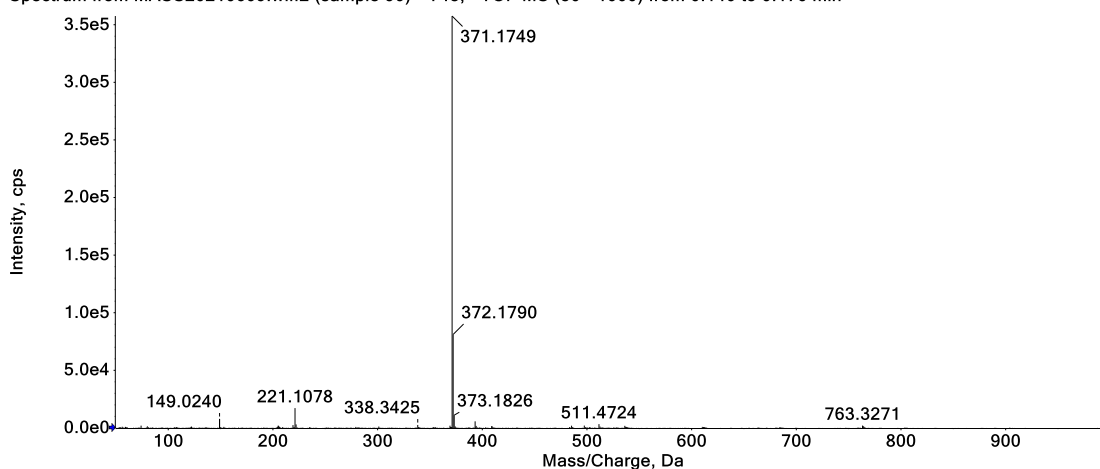

Spectrum from MASS20210609.wiff2 (sample 90) - Y43, +TOF MS (50 - 1000) from 0.140 to 0.176 min

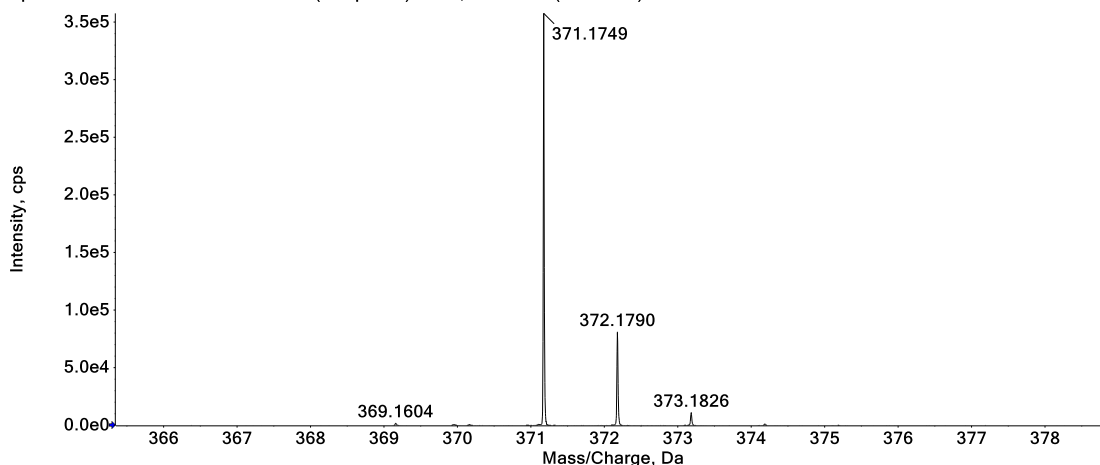

| Hit | Formula                                                       | m/z      | RDB  | ppm  | MS Rank | MSMS ppm | MSMS Rank | Found |
|-----|---------------------------------------------------------------|----------|------|------|---------|----------|-----------|-------|
| 1   | C <sub>24</sub> H <sub>22</sub> N <sub>2</sub> O <sub>2</sub> | 371.1754 | 15.0 | -1.4 | 1       |          |           | NA/NA |

## HR-MS spectrum of 5f

Spectrum from MASS20210609.wiff2 (sample 93) - Y46, +TOF MS (50 - 1000) from 0.140 to 0.176 min

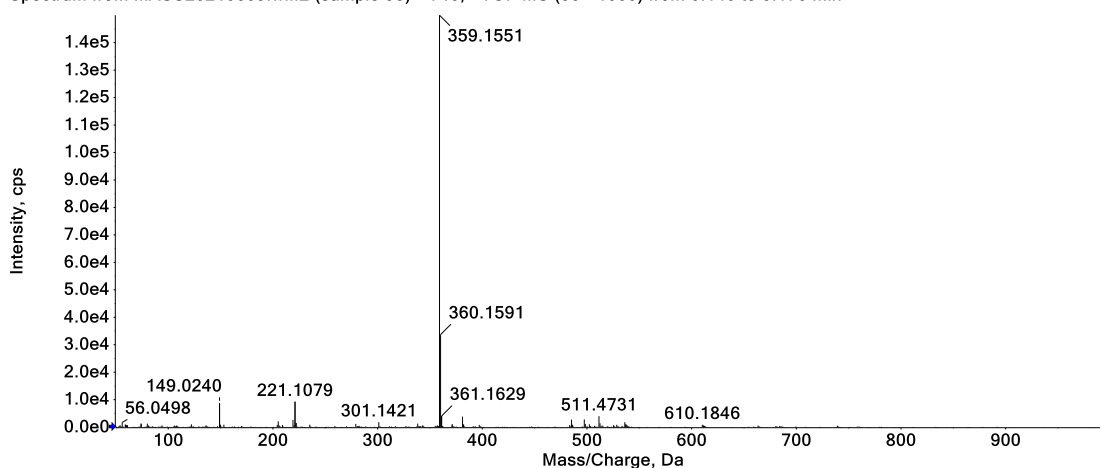

Spectrum from MASS20210609.wiff2 (sample 93) - Y46, +TOF MS (50 - 1000) from 0.140 to 0.176 min

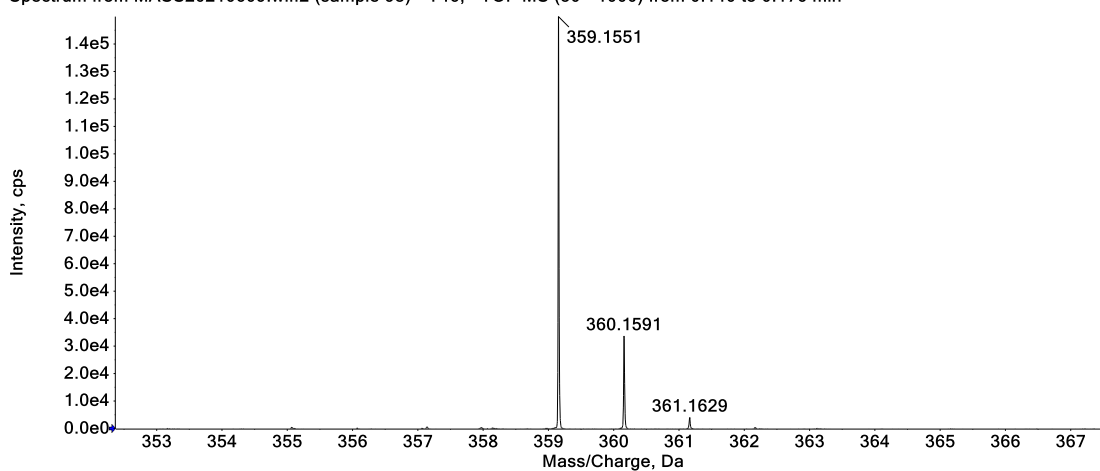

| Hit | Formula                                           | m/z      | RDB  | ppm  | MS Rank | MSMS ppm | MSMS Rank | Found |
|-----|---------------------------------------------------|----------|------|------|---------|----------|-----------|-------|
| 1   | C <sub>23</sub> H <sub>19</sub> FN <sub>2</sub> O | 359.1554 | 15.0 | -0.9 | 1       |          |           | NA/NA |

## HR-MS spectrum of 5i

Spectrum from MASS20220928.wiff2 (sample 10) - Y9, Experiment 1, +IDA TOF MS (50 - 1000) from 0.046 to 0.071 min

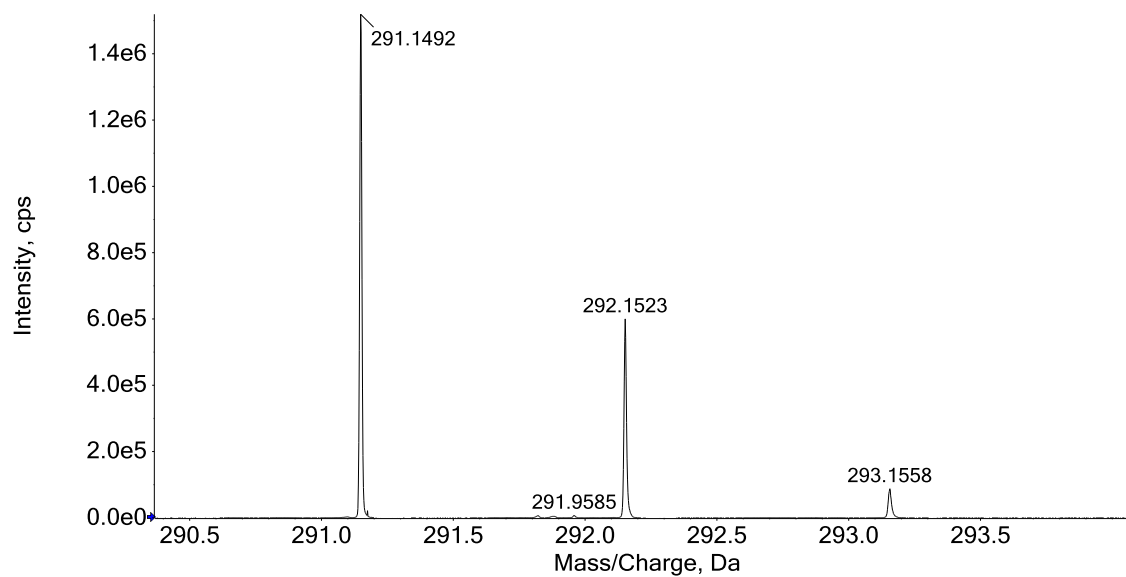

| Hit | Formula   | m/z      | RDB  | ppm | MS Rank | MSMS ppm | MSMS Rank | Found |
|-----|-----------|----------|------|-----|---------|----------|-----------|-------|
| 1   | C19H18N2O | 291.1492 | 12.0 | 0.0 | 1       |          |           | NA/NA |

## HR-MS spectrum of 5j

Spectrum from MASS20220928.wiff2 (sample 11) - Y10, Experiment 1, +IDA TOF MS (50 - 1000) from 0.046 to 0.069 min

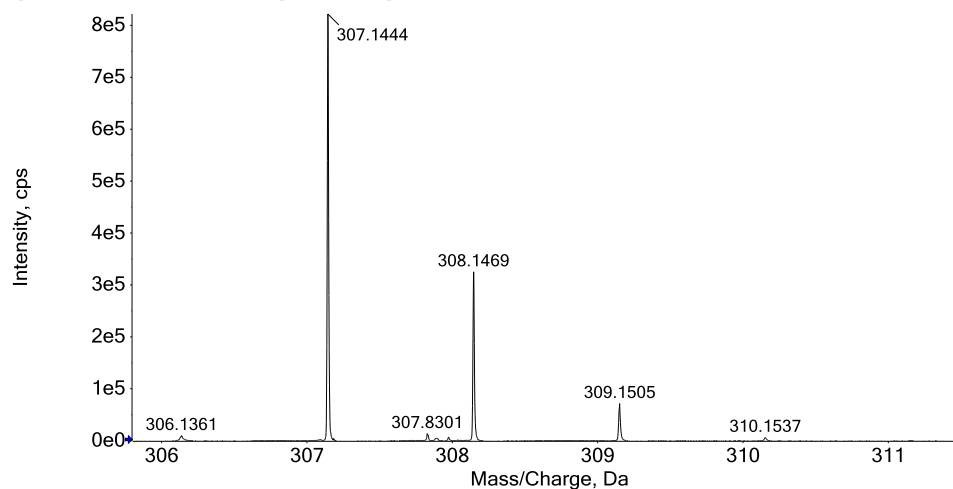

| Hit | Formula    | m/z      | RDB  | ppm | MS Rank | MSMS ppm | MSMS Rank | Found |
|-----|------------|----------|------|-----|---------|----------|-----------|-------|
| 1   | C19H18N2O2 | 307.1441 | 12.0 | 1.0 | 1       |          |           | NA/NA |

## HR-MS spectrum of 5k

Spectrum from MASS20220928.wiff2 (sample 12) - Y11, Experiment 1, +IDA TOF MS (50 - 1000) from 0.046 to 0.070 min

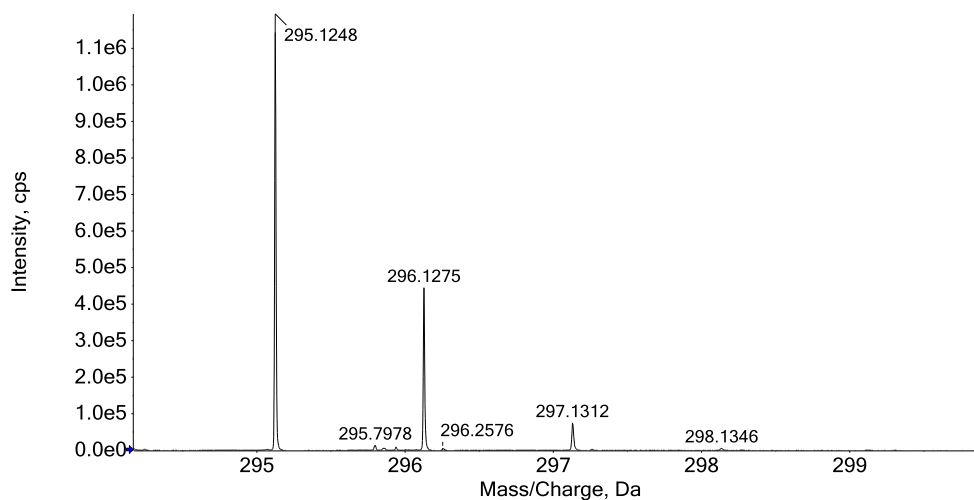

## HR-MS spectrum of 5l

Spectrum from MASS202100707.wiff2 (sample 6) - Y6, +TOF MS (50 - 1000) from 0.158 to 0.193 min

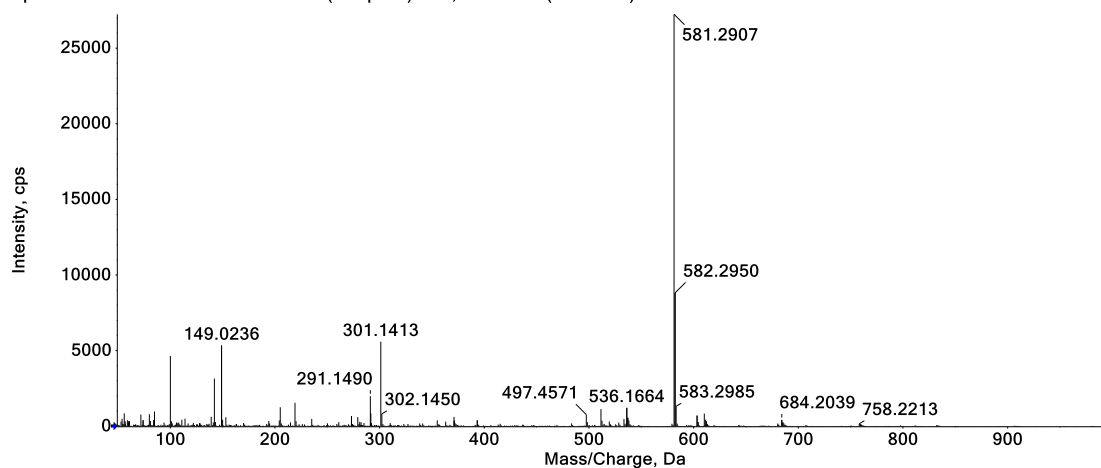

Spectrum from MASS202100707.wiff2 (sample 6) - Y6, +TOF MS (50 - 1000) from 0.158 to 0.193 min

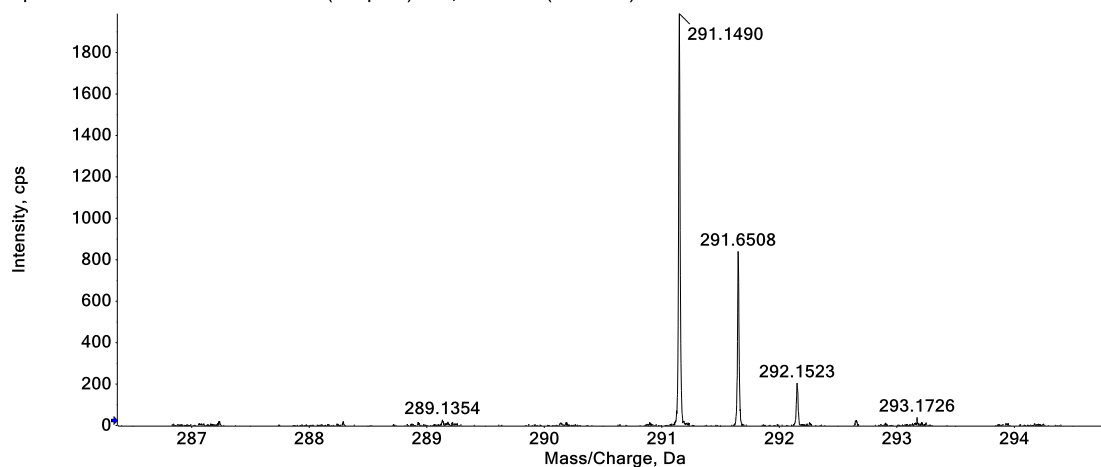

Spectrum from MASS202100707.wiff2 (sample 6) - Y6, +TOF MS (50 - 1000) from 0.158 to 0.193 min

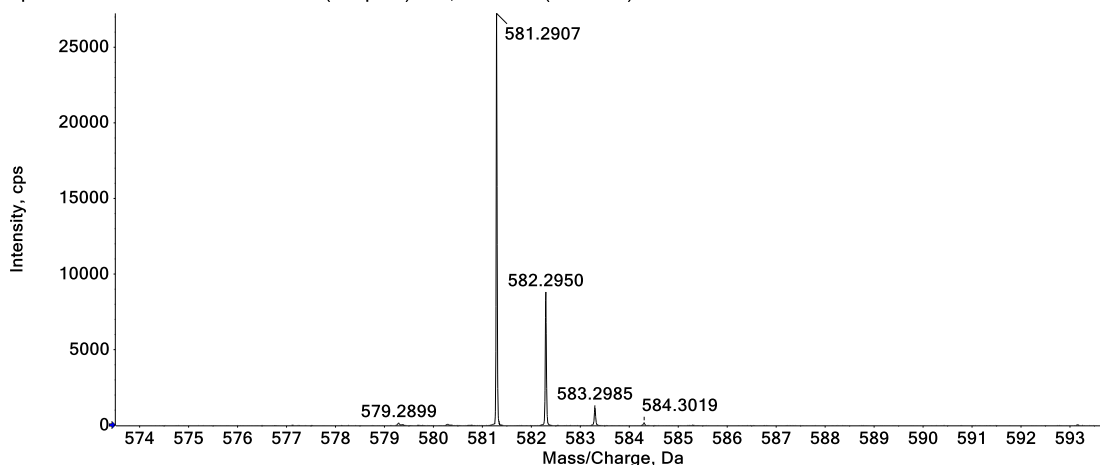

| Hit | Formula    | m/z      | RDB  | ppm  | MS Rank | MSMS ppm | MSMS Rank | Found |
|-----|------------|----------|------|------|---------|----------|-----------|-------|
| 1   | C38H36N4O2 | 581.2911 | 23.0 | -0.7 | 1       |          |           | NA/NA |

## HR-MS spectrum of 5m

Spectrum from MASS20210120.wiff2 (sample 15) - Y4, +TOF MS (50 - 1000) from 0.105 to 0.158 min

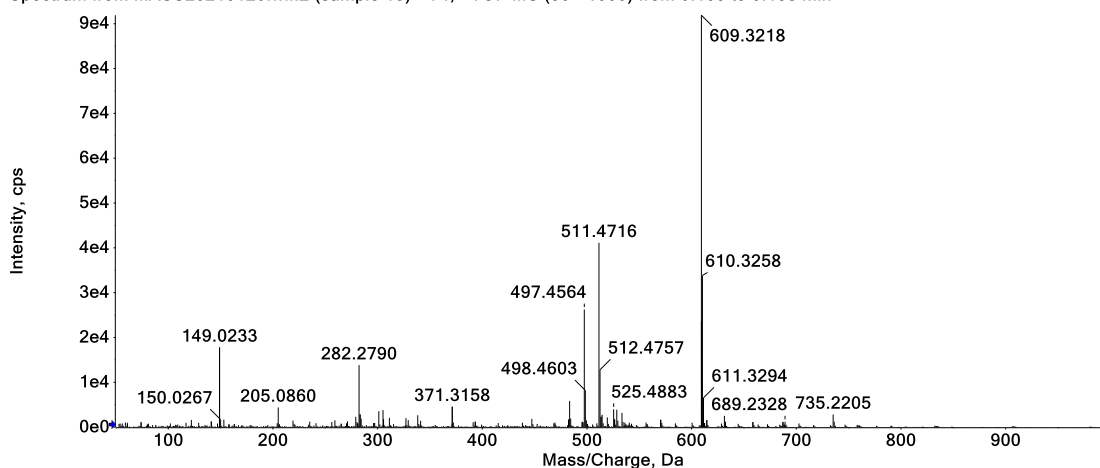

Spectrum from MASS20210120.wiff2 (sample 15) - Y4, +TOF MS (50 - 1000) from 0.105 to 0.158 min

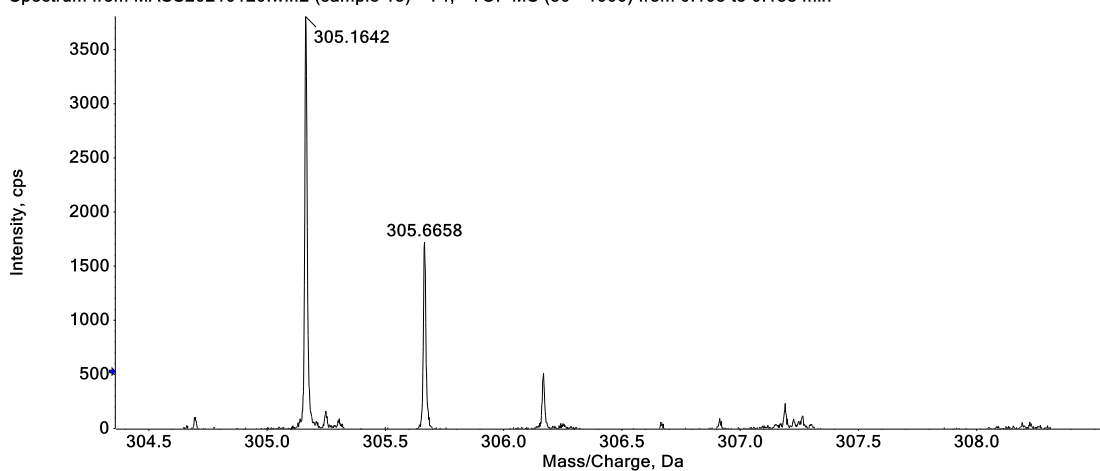

| Hit | Formula   | m/z      | RDB  | ppm  | MS Rank | MSMS ppm | MSMS Rank | Found |
|-----|-----------|----------|------|------|---------|----------|-----------|-------|
| 1   | C20H20N2O | 305.1648 | 12.0 | -2.1 | 1       |          |           | NA/NA |

## HR-MS spectrum of 5n

Spectrum from MASS20211013.wiff2 (sample 54) - Y30, +TOF MS (50 - 1000) from 0.149 to 0.220 min

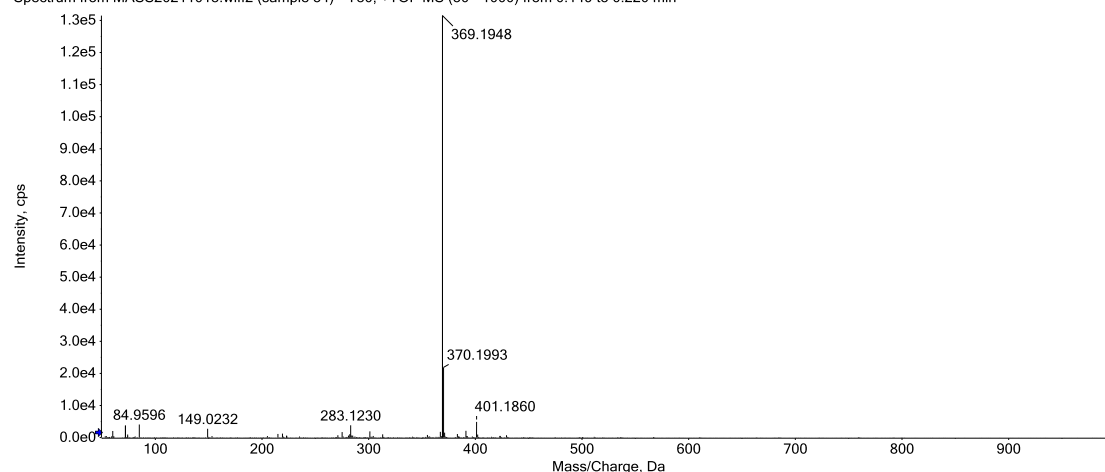

Spectrum from MASS20211013.wiff2 (sample 54) - Y30, +TOF MS (50 - 1000) from 0.149 to 0.220 min

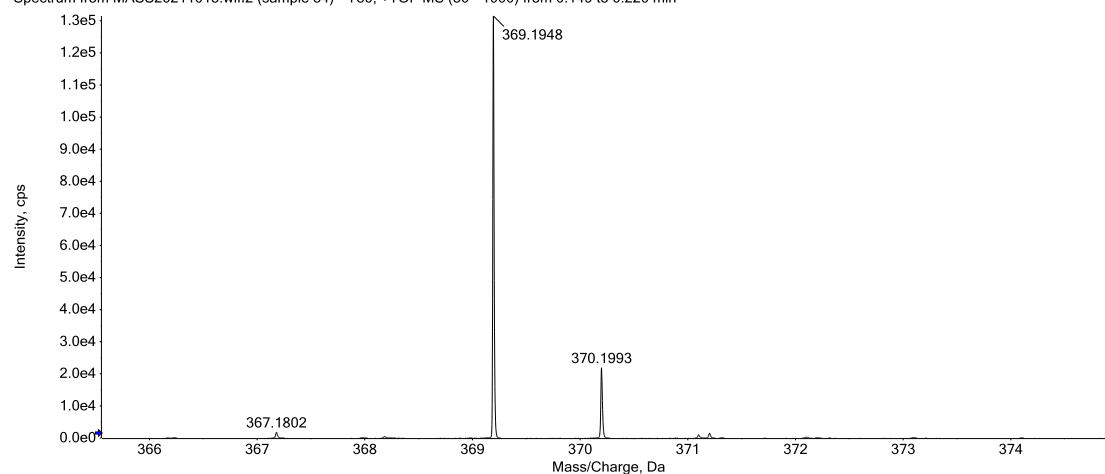

| Hit | Formula                                          | m/z      | RDB  | ppm  | MS Rank | MSMS ppm | MSMS Rank | Found |
|-----|--------------------------------------------------|----------|------|------|---------|----------|-----------|-------|
| 1   | C <sub>25</sub> H <sub>24</sub> N <sub>2</sub> O | 369.1961 | 15.0 | -2.3 | 1       |          |           | NA/NA |

## HR-MS spectrum of 6a

Spectrum from MASS20211013.wiff2 (sample 36) - Y12, +TOF MS (50 - 1000) from 0.123 to 0.193 min

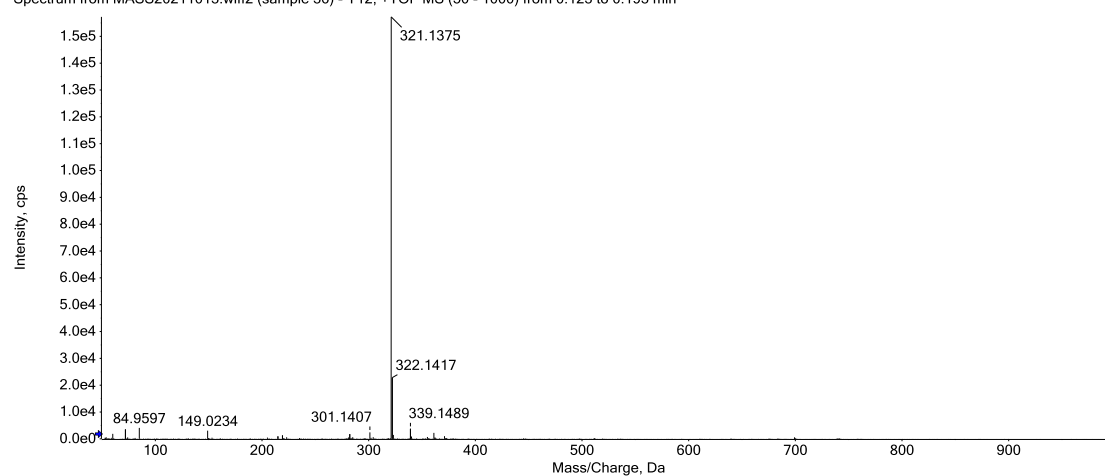

Spectrum from MASS20211013.wiff2 (sample 36) - Y12, +TOF MS (50 - 1000) from 0.123 to 0.193 min

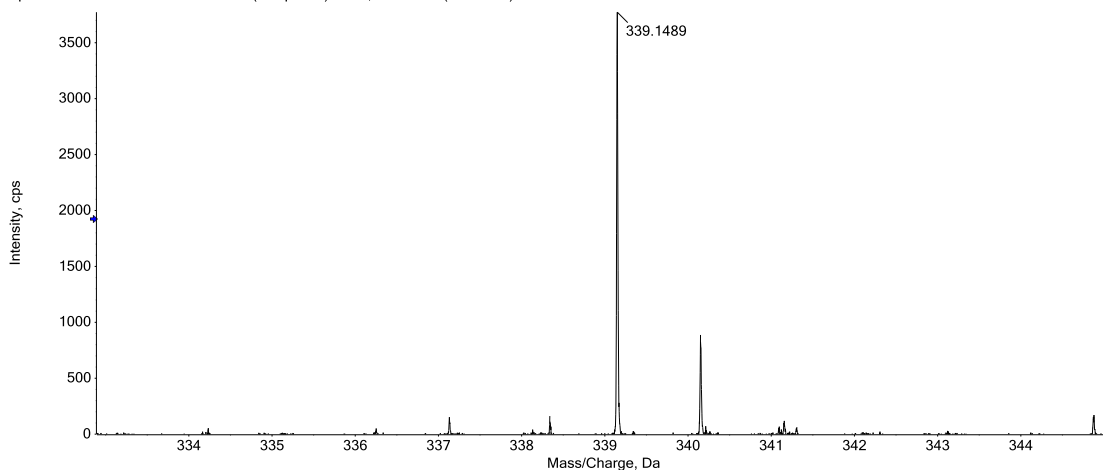

| Hit | Formula   | m/z      | RDB  | ppm  | MS Rank | MSMS ppm | MSMS Rank | Found |
|-----|-----------|----------|------|------|---------|----------|-----------|-------|
| 1   | C23H18N2O | 339.1492 | 16.0 | -0.9 | 1       |          |           | NA/NA |

## HR-MS spectrum of 6b

Spectrum from MASS20211013.wiff2 (sample 48) - Y24, +TOF MS (50 - 1000) from 0.149 to 0.220 min

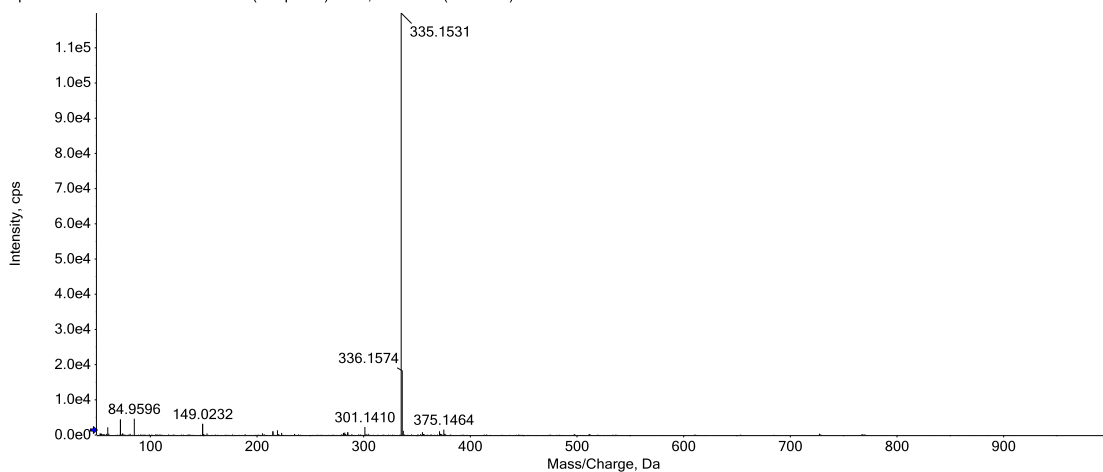

Spectrum from MASS20211013.wiff2 (sample 48) - Y24, +TOF MS (50 - 1000) from 0.149 to 0.220 min

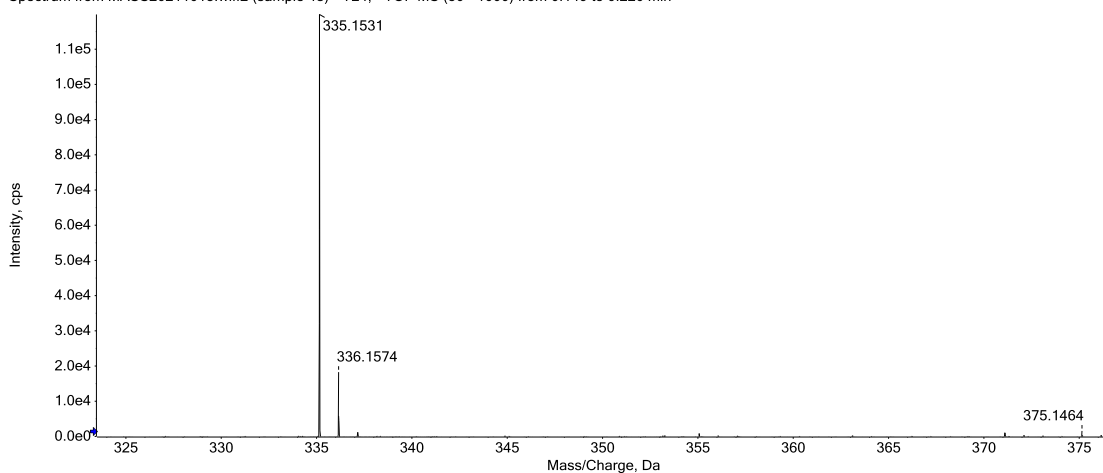

Spectrum from MASS20211013.wiff2 (sample 48) - Y24, +TOF MS (50 - 1000) from 0.149 to 0.220 min

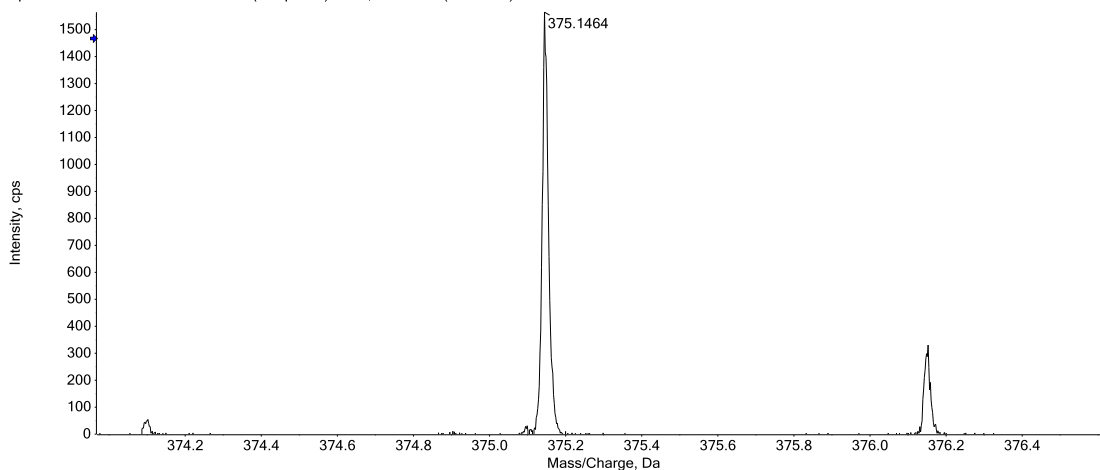

| Hit | Formula                                          | m/z      | RDB  | ppm  | MS Rank | MSMS ppm | MSMS Rank | Found |
|-----|--------------------------------------------------|----------|------|------|---------|----------|-----------|-------|
| 1   | C <sub>24</sub> H <sub>20</sub> N <sub>2</sub> O | 375.1468 | 16.0 | -1.0 | 1       |          |           | NA/NA |

## HR-MS spectrum of 6c

Spectrum from MASS20211013.wiff2 (sample 44) - Y20, +TOF MS (50 - 1000) from 0.114 to 0.184 min

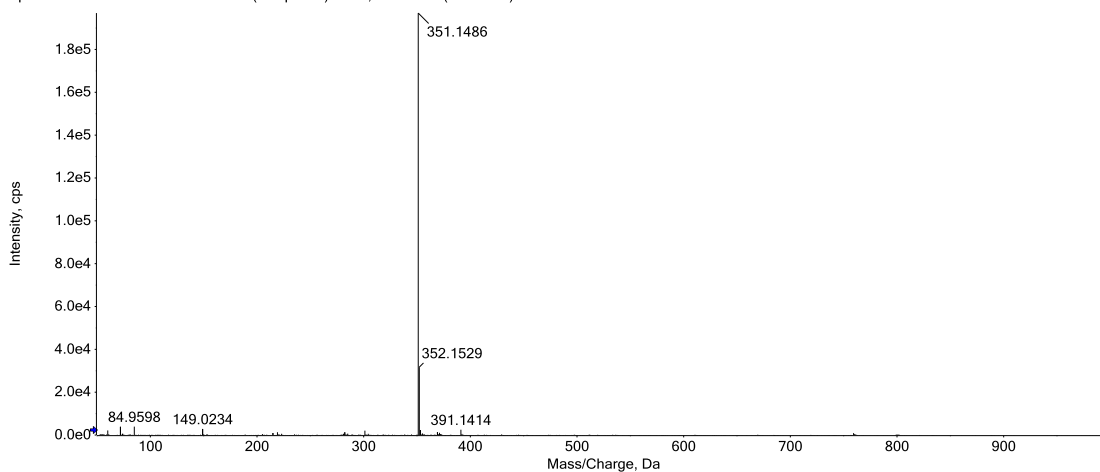

Spectrum from MASS20211013.wiff2 (sample 44) - Y20, +TOF MS (50 - 1000) from 0.114 to 0.184 min

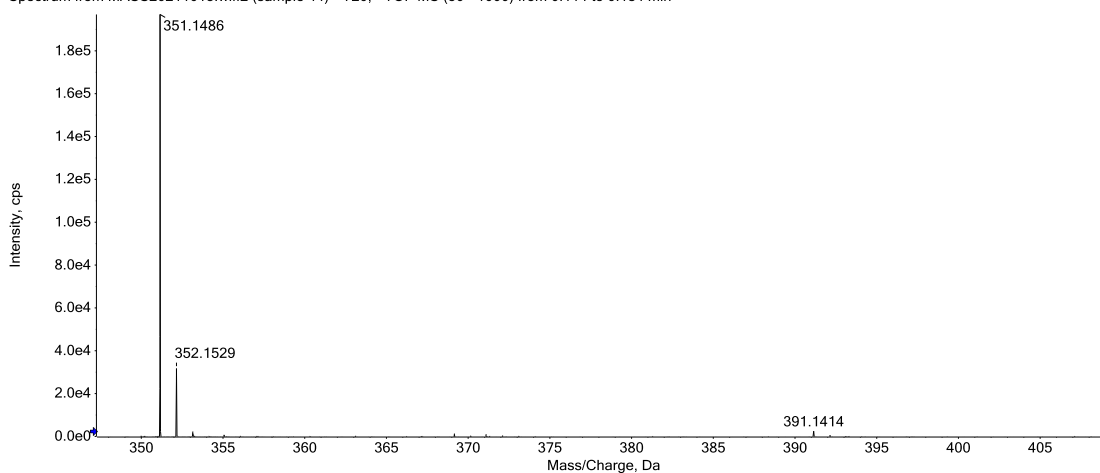

| Hit | Formula                                          | m/z      | RDB  | ppm  | MS Rank | MSMS ppm | MSMS Rank | Found |
|-----|--------------------------------------------------|----------|------|------|---------|----------|-----------|-------|
| 1   | C <sub>24</sub> H <sub>18</sub> N <sub>2</sub> O | 351.1492 | 17.0 | -1.7 | 1       |          |           | NA/NA |



## HR-MS spectrum of 6d

Spectrum from MASS20211013.wiff2 (sample 42) - Y18, +TOF MS (50 - 1000) from 0.114 to 0.184 min

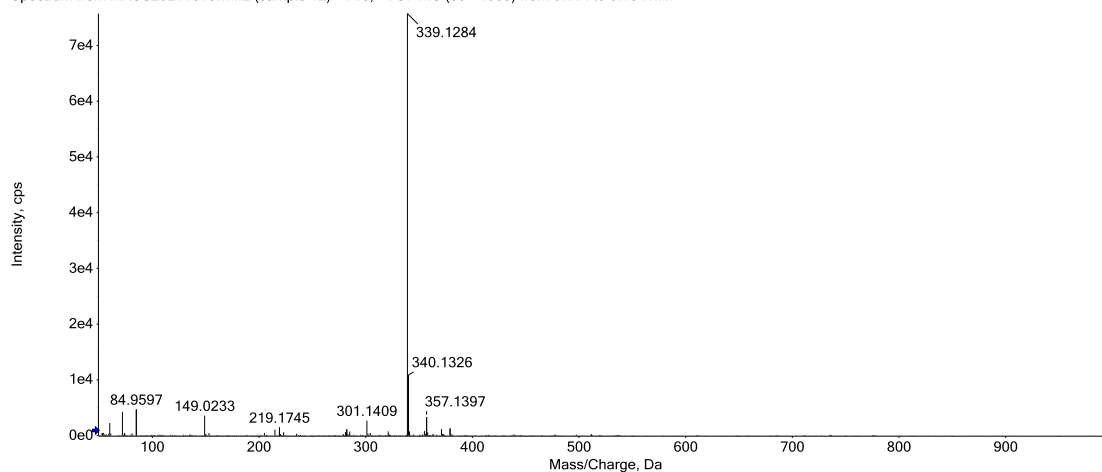

Spectrum from MASS20211013.wiff2 (sample 42) - Y18, +TOF MS (50 - 1000) from 0.114 to 0.184 min

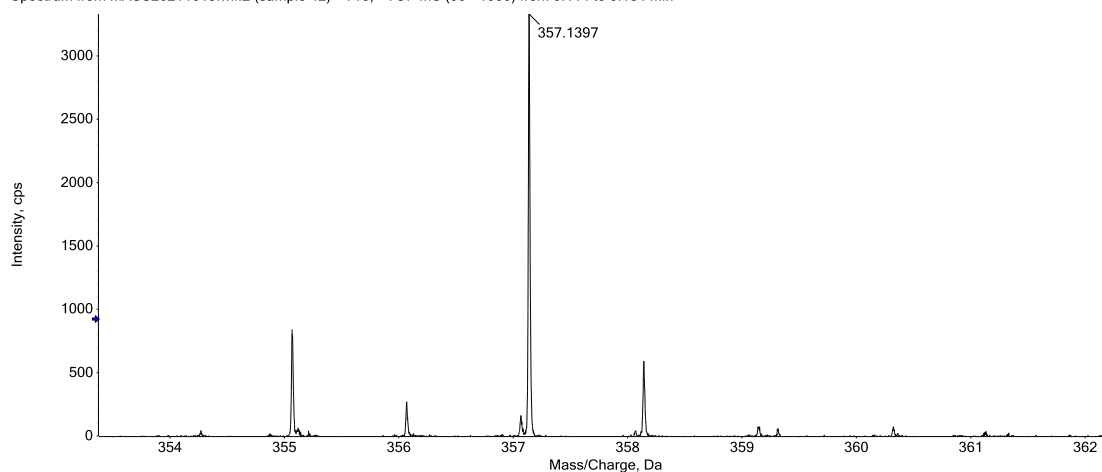

| Hit | Formula    | m/z      | RDB  | ppm  | MS Rank | MSMS ppm | MSMS Rank | Found |
|-----|------------|----------|------|------|---------|----------|-----------|-------|
| 1   | C23H17FN2O | 357.1398 | 16.0 | -0.2 | 1       |          |           | NA/NA |

## HR-MS spectrum of 6e

Spectrum from MASS20211013.wiff2 (sample 52) - Y28, +TOF MS (50 - 1000) from 0.149 to 0.220 min

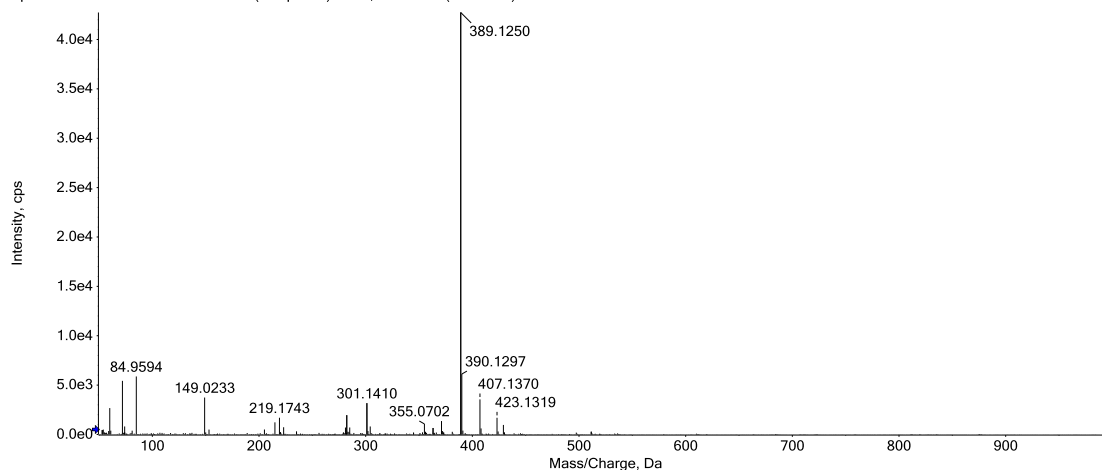

Spectrum from MASS20211013.wiff2 (sample 52) - Y28, +TOF MS (50 - 1000) from 0.149 to 0.220 min

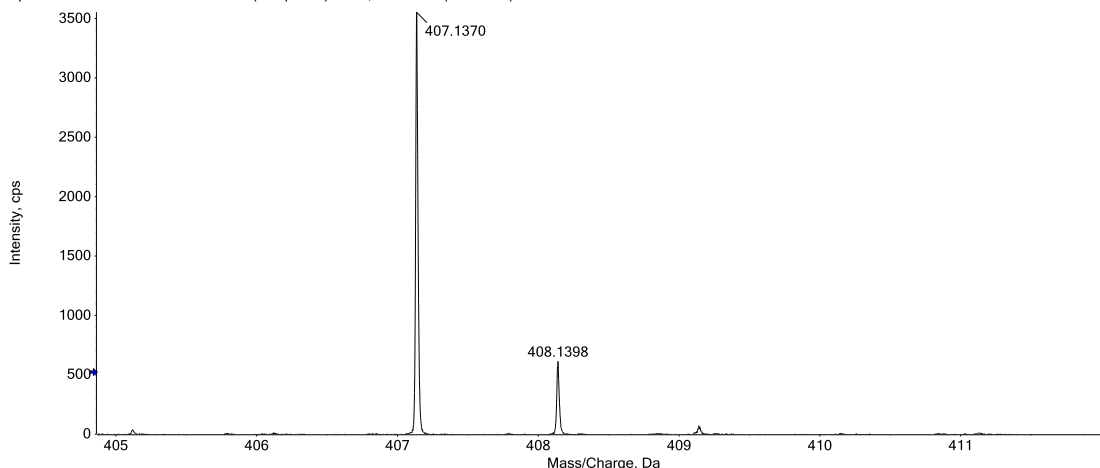

| Hit | Formula                                                         | m/z      | RDB  | ppm | MS Rank | MSMS ppm | MSMS Rank | Found |
|-----|-----------------------------------------------------------------|----------|------|-----|---------|----------|-----------|-------|
| 1   | C <sub>24</sub> H <sub>17</sub> F <sub>3</sub> N <sub>2</sub> O | 407.1366 | 16.0 | 1.0 | 1       |          |           | NA/NA |

## HR-MS spectrum of 6f

Spectrum from MASS20211013.wiff2 (sample 46) - Y22, +TOF MS (50 - 1000) from 0.123 to 0.193 min

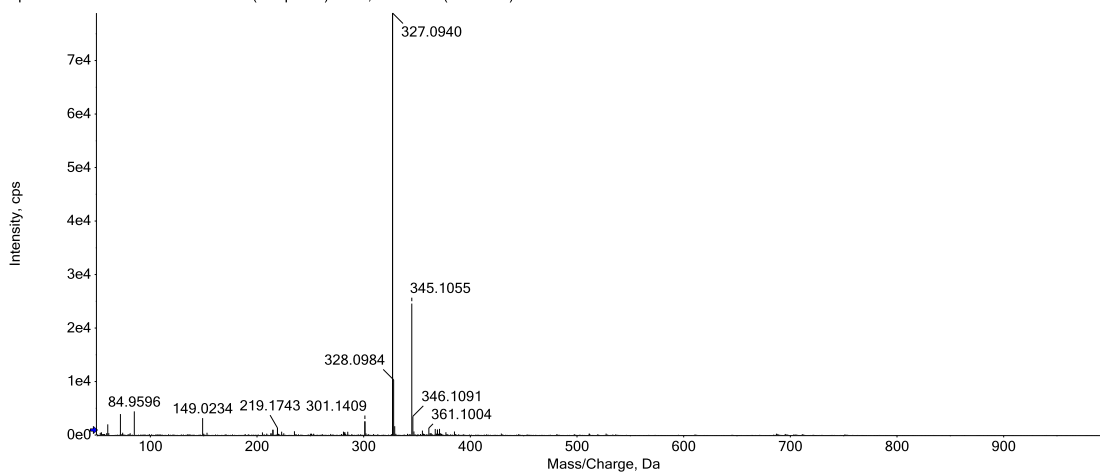

Spectrum from MASS20211013.wiff2 (sample 46) - Y22, +TOF MS (50 - 1000) from 0.123 to 0.193 min

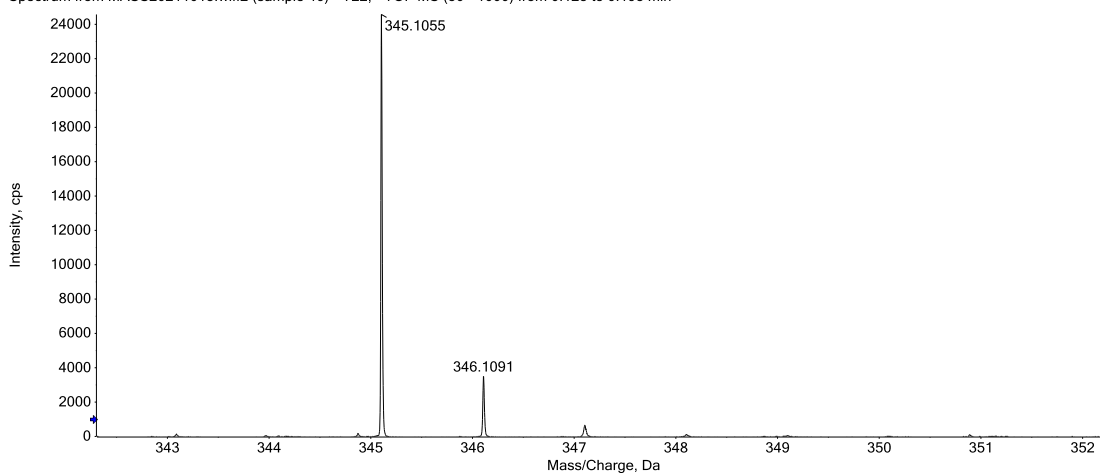

| Hit | Formula                                                       | m/z      | RDB  | ppm  | MS Rank | MSMS ppm | MSMS Rank | Found |
|-----|---------------------------------------------------------------|----------|------|------|---------|----------|-----------|-------|
| 1   | C <sub>21</sub> H <sub>16</sub> N <sub>2</sub> O <sub>5</sub> | 345.1056 | 15.0 | -0.3 | 1       |          |           | NA/NA |

# HR-MS spectrum of 6g

Spectrum from MASS20210609.wiff2 (sample 65) - Y18, +TOF MS (50 - 1000) from 0.079 to 0.114 min

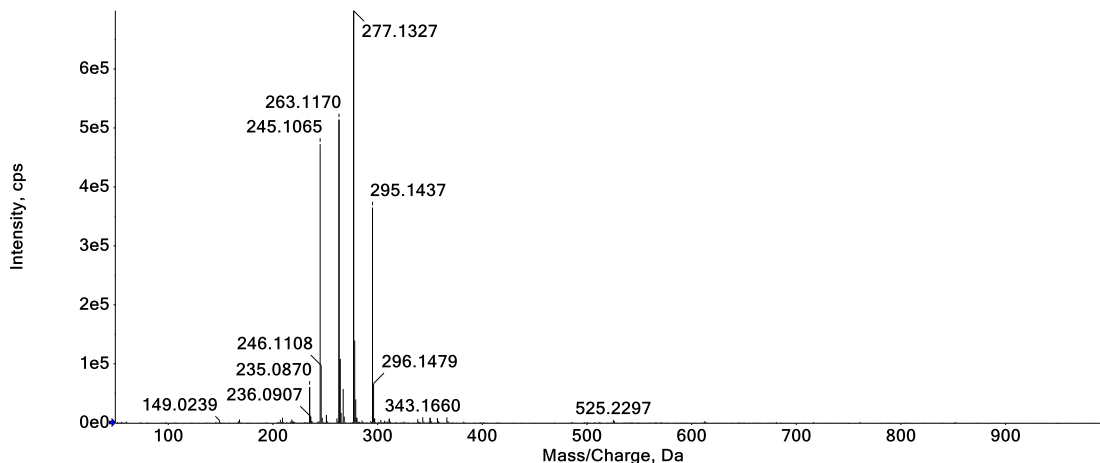

Spectrum from MASS20210609.wiff2 (sample 65) - Y18, +TOF MS (50 - 1000) from 0.079 to 0.114 min

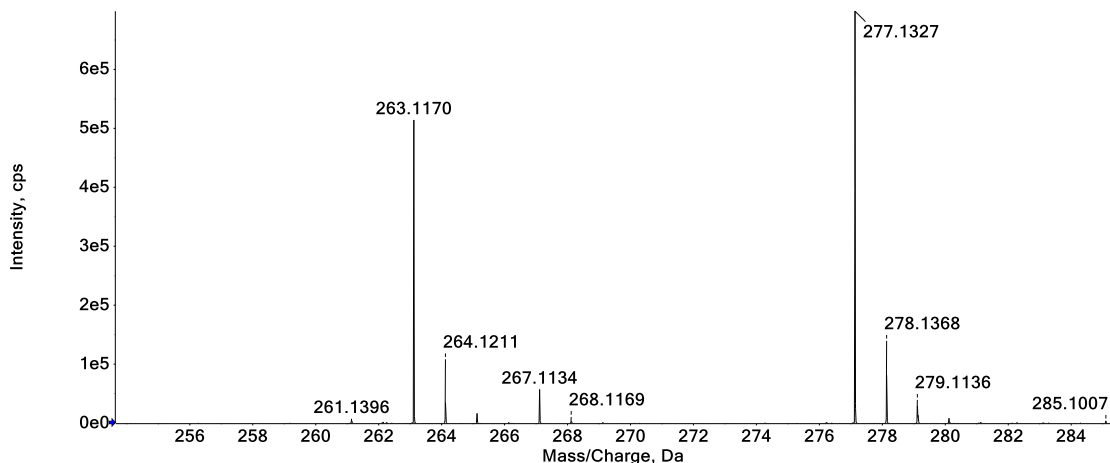

Spectrum from MASS20210609.wiff2 (sample 65) - Y18, +TOF MS (50 - 1000) from 0.079 to 0.114 min

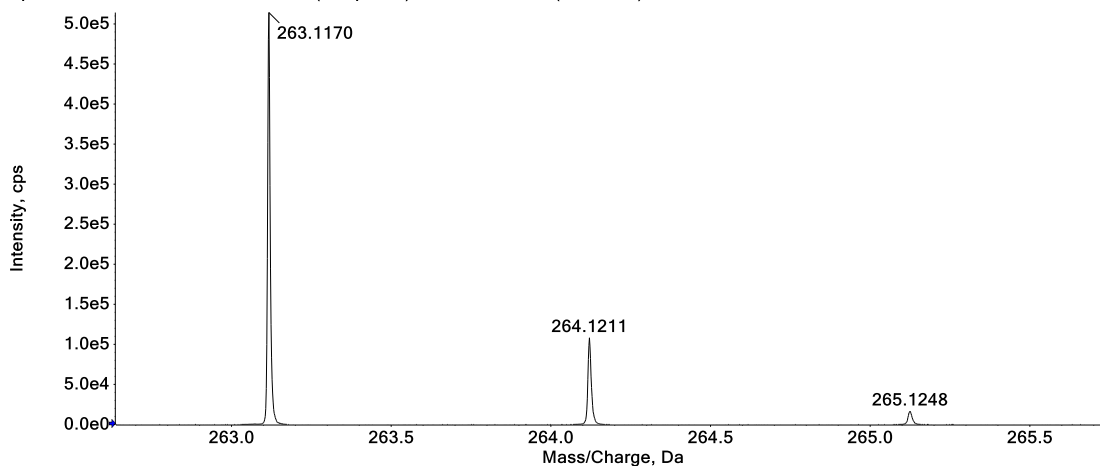

| Hit | Formula   | m/z      | RDB  | ppm  | MS Rank | MSMS ppm | MSMS Rank | Found |
|-----|-----------|----------|------|------|---------|----------|-----------|-------|
| 1   | C17H14N2O | 263.1179 | 12.0 | -3.4 | 1       |          |           | NA/NA |

## HR-MS spectrum of 6h

Spectrum from MASS20220928.wiff2 (sample 9) - Y8, Experiment 1, +IDA TOF MS (50 - 1000) from 0.046 to 0.071 min

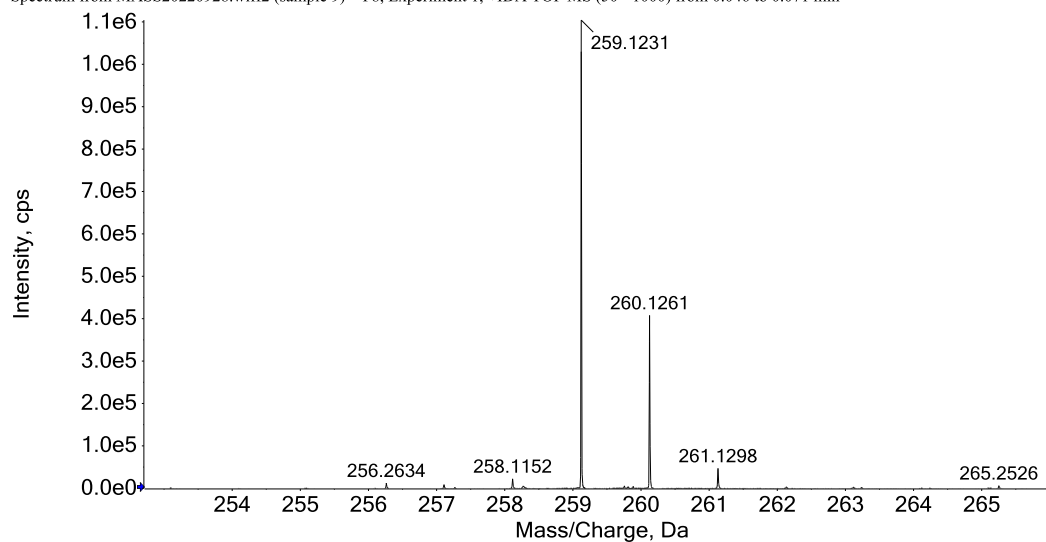

## HR-MS spectrum of 6i

Spectrum from MASS202111173.wiff2 (sample 7) - Y7, +TOF MS (50 - 1000) from 0.149 to 0.193 min

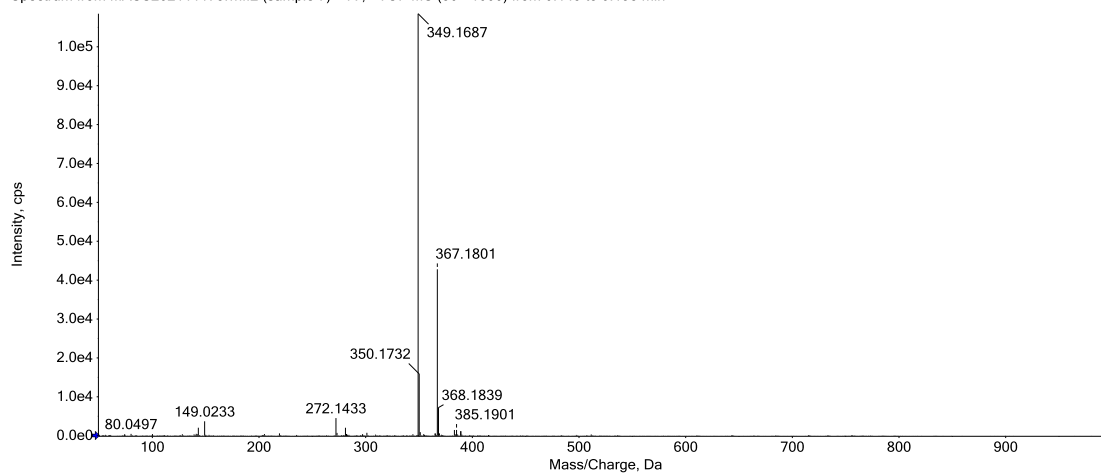

Spectrum from MASS202111173.wiff2 (sample 7) - Y7, +TOF MS (50 - 1000) from 0.149 to 0.193 min

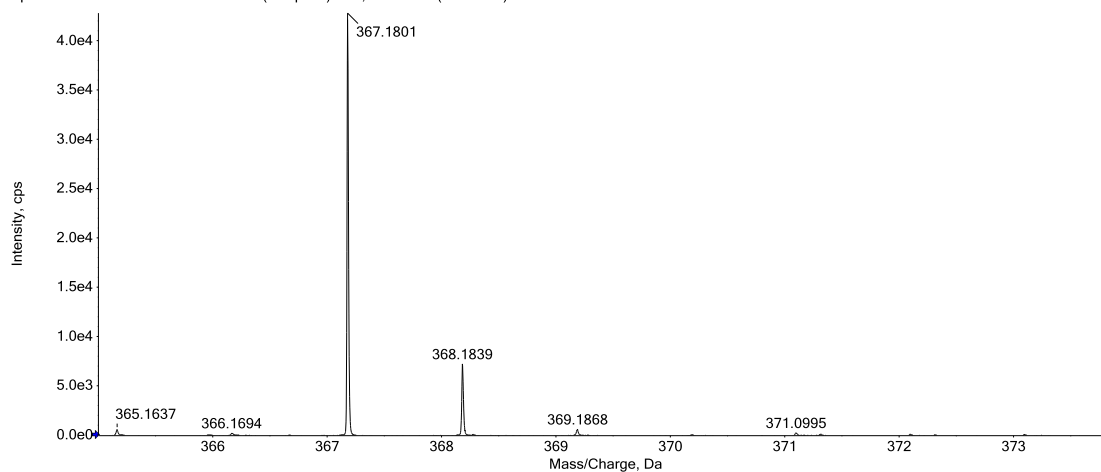

| Hit | Formula                                          | m/z      | RDB  | ppm  | MS Rank | MSMS ppm | MSMS Rank | Found |
|-----|--------------------------------------------------|----------|------|------|---------|----------|-----------|-------|
| 1   | C <sub>25</sub> H <sub>22</sub> N <sub>2</sub> O | 367.1805 | 16.0 | -1.1 | 1       |          |           | NA/NA |

## HR-MS spectrum of 6j

Spectrum from MASS20211013.wiff2 (sample 50) - Y26, +TOF MS (50 - 1000) from 0.149 to 0.220 min

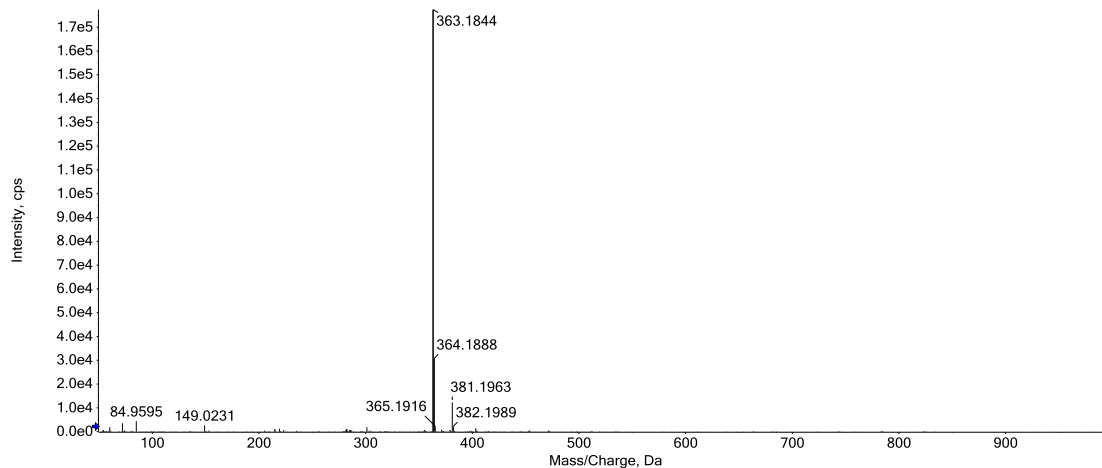

Spectrum from MASS20211013.wiff2 (sample 50) - Y26, +TOF MS (50 - 1000) from 0.149 to 0.220 min

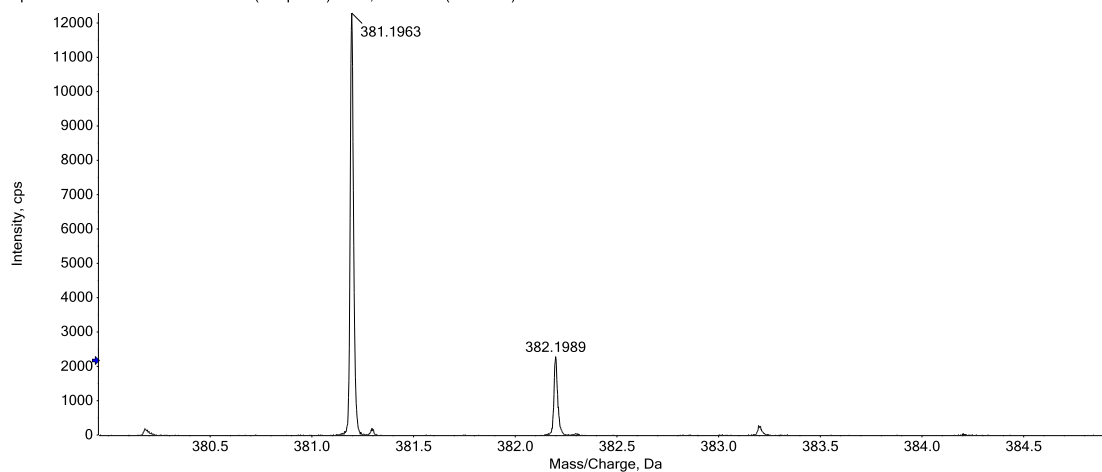

| Hit | Formula                                          | m/z      | RDB  | ppm | MS Rank | MSMS ppm | MSMS Rank | Found |
|-----|--------------------------------------------------|----------|------|-----|---------|----------|-----------|-------|
| 1   | C <sub>26</sub> H <sub>24</sub> N <sub>2</sub> O | 381.1961 | 16.0 | 0.4 | 1       |          |           | NA/NA |

HR-MS spectrum of 6k

Spectrum from MASS202111173.wiff2 (sample 5) - Y5, +TOF MS (50 - 1000) from 0.149 to 0.193 min

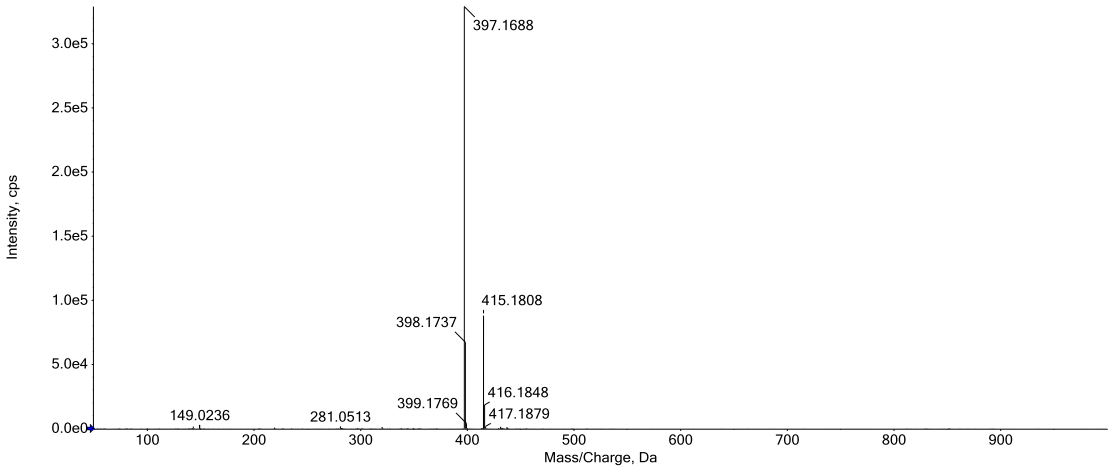

Spectrum from MASS202111173.wiff2 (sample 5) - Y5, +TOF MS (50 - 1000) from 0.149 to 0.193 min

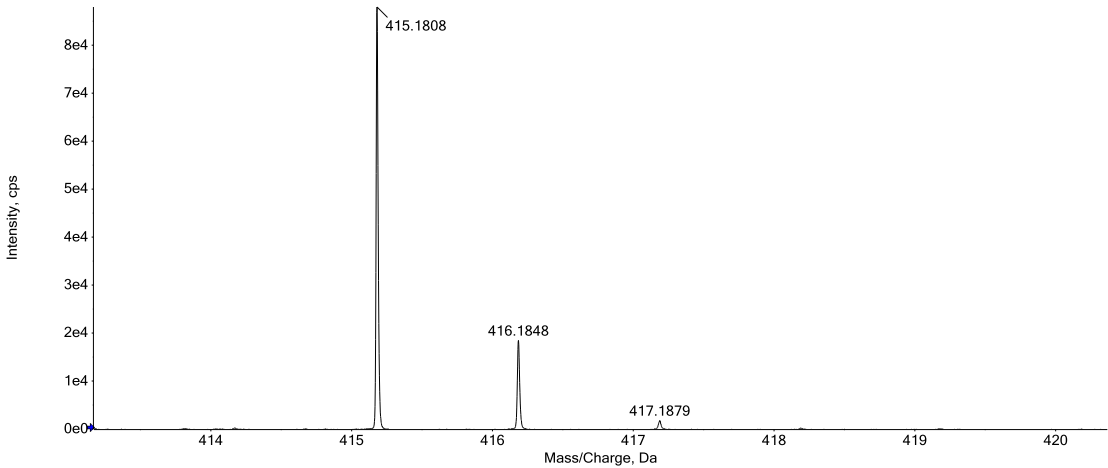

| Hit | Formula   | m/z      | RDB  | ppm | MS Rank | MSMS ppm | MSMS Rank | Found |
|-----|-----------|----------|------|-----|---------|----------|-----------|-------|
| 1   | C29H22N2O | 415.1805 | 20.0 | 0.7 | 1       |          |           | NA/NA |

HR-MS spectrum of 6l

Spectrum from mass20220412.wiff2 (sample 42) - Y2, Experiment 1, +TOF MS (50 - 1000) from 0.633 to 0.132 min

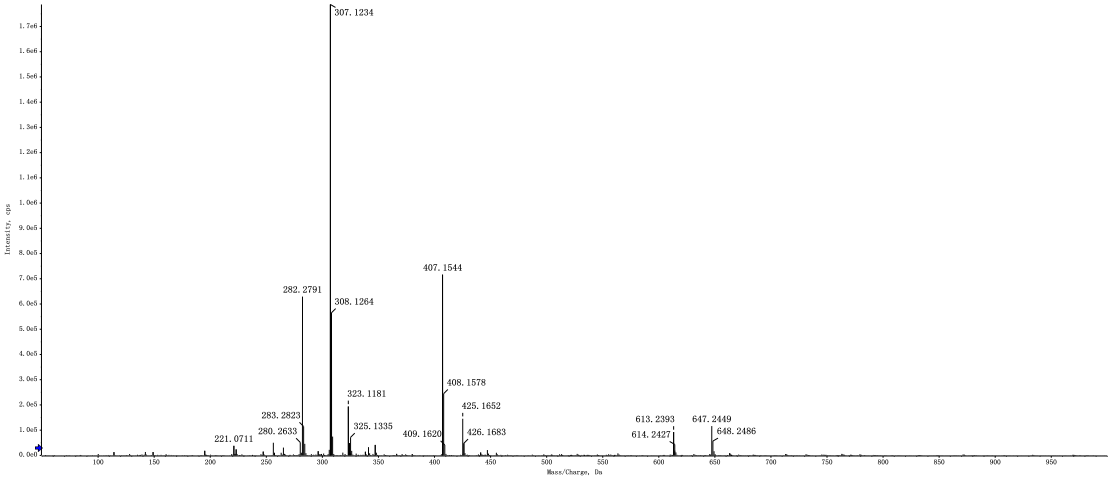

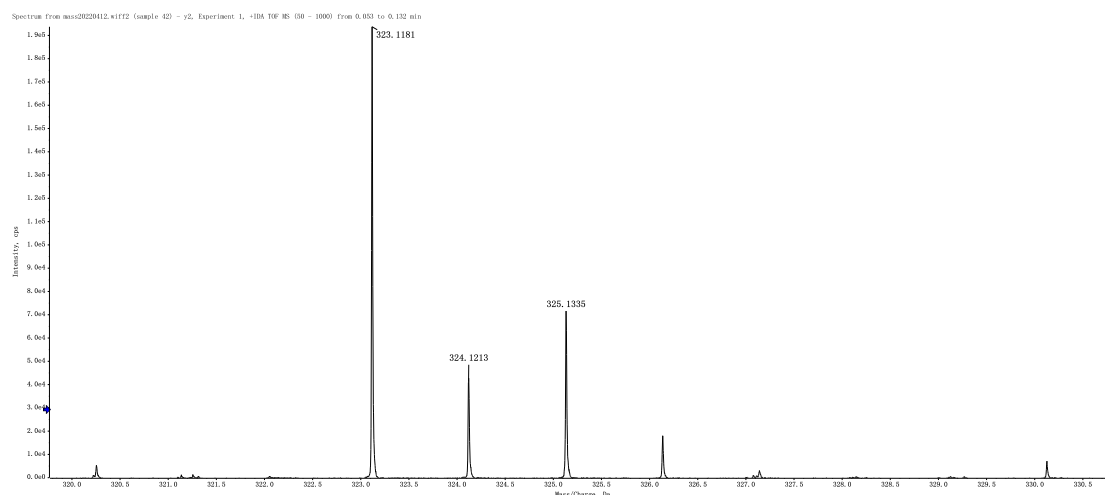

| Hit | Formula   | m/z      | RDB  | ppm | MS Rank | MSMS ppm | MSMS Rank | Found |
|-----|-----------|----------|------|-----|---------|----------|-----------|-------|
| 1   | C22H14N2O | 323.1179 | 17.0 | 0.7 | 1       |          |           | NA/NA |

## HR-MS spectrum of 6m

Spectrum from MASS202111173.wiff2 (sample 13) - Y13, +TOF MS (50 - 1000) from 0.149 to 0.193 min

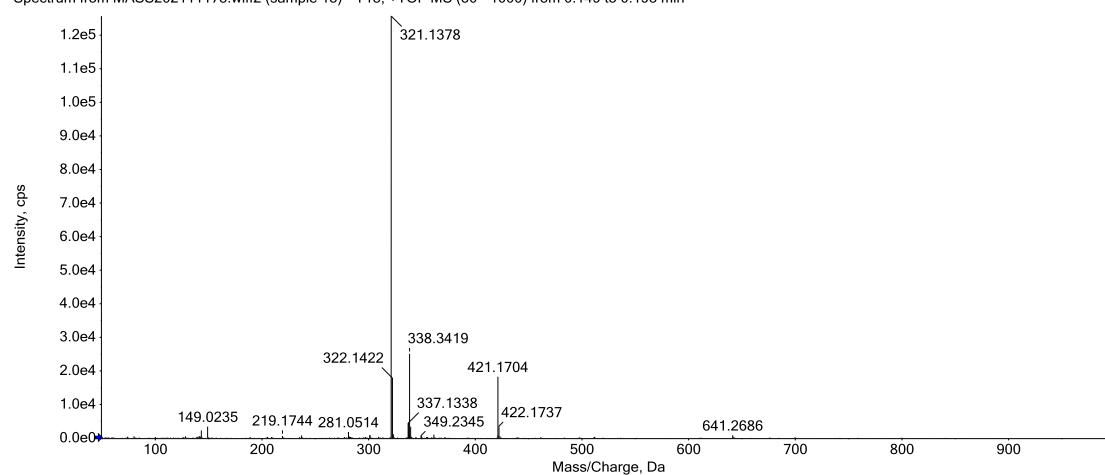

Spectrum from MASS202111173.wiff2 (sample 13) - Y13, +TOF MS (50 - 1000) from 0.149 to 0.193 min

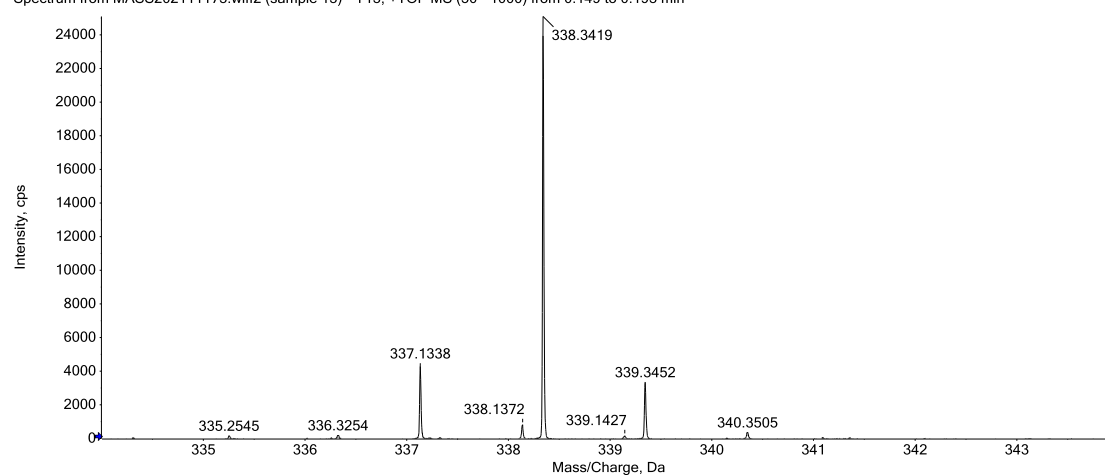

Spectrum from MASS202111173.wiff2 (sample 13) - Y13, +TOF MS (50 - 1000) from 0...02111173.wiff2 (sample 13) - Y13, +TOF MS (50 - 1000) from 0.237 to 0.299 min]

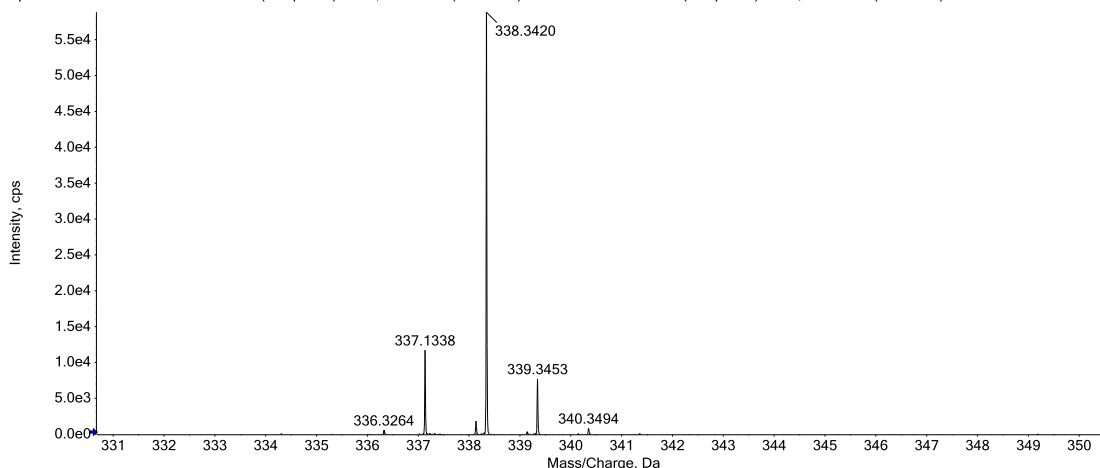

Spectrum from MASS202111173.wiff2 (sample 13) - Y13, +TOF MS (50 - 1000) from 0...02111173.wiff2 (sample 13) - Y13, +TOF MS (50 - 1000) from 0.237 to 0.299 min]

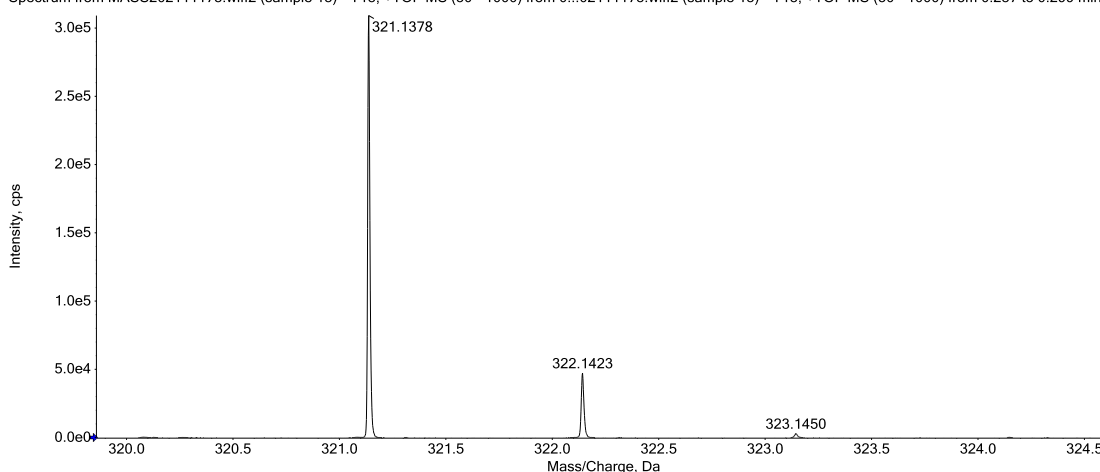

| Hit | Formula  | m/z      | RDB  | ppm  | MS Rank | MSMS ppm | MSMS Rank | Found |
|-----|----------|----------|------|------|---------|----------|-----------|-------|
| 1   | C23H16N2 | 321.1386 | 17.0 | -2.6 | 1       |          |           | NA/NA |

## HR-MS spectrum of 6n

Spectrum from MASS202111173.wiff2 (sample 1) - Y1, +TOF MS (50 - 1000) from 0.1...S202111173.wiff2 (sample 1) - Y1, +TOF MS (50 - 1000) from 0.237 to 0.299 min]

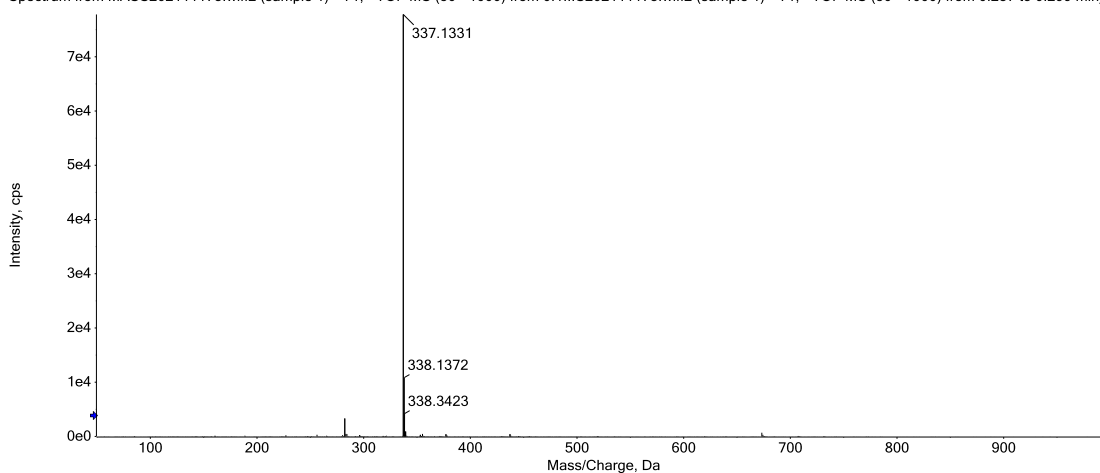



Spectrum from MASS202111173.wiff2 (sample 1) - Y1, +TOF MS (50 - 1000) from 0.0...S202111173.wiff2 (sample 1) - Y1, +TOF MS (50 - 1000) from 0.237 to 0.299 min]

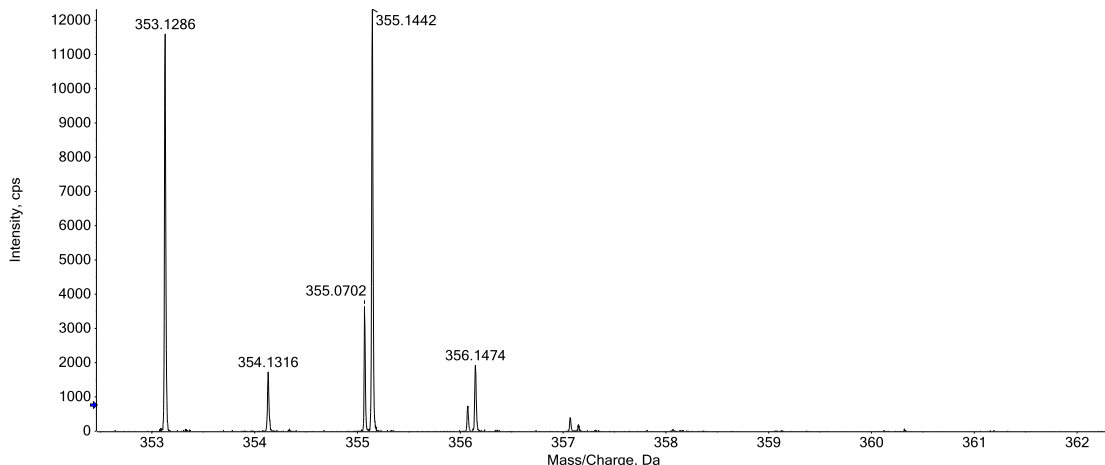

| Hit | Formula    | m/z      | RDB  | ppm | MS Rank | MSMS ppm | MSMS Rank | Found |
|-----|------------|----------|------|-----|---------|----------|-----------|-------|
| 1   | C23H18N2O2 | 355.1441 | 16.0 | 0.3 | 1       |          |           | NA/NA |

## HR-MS spectrum of 6o

Spectrum from MASS202111173.wiff2 (sample 3) - Y3, +TOF MS (50 - 1000) from 0.149 to 0.193 min

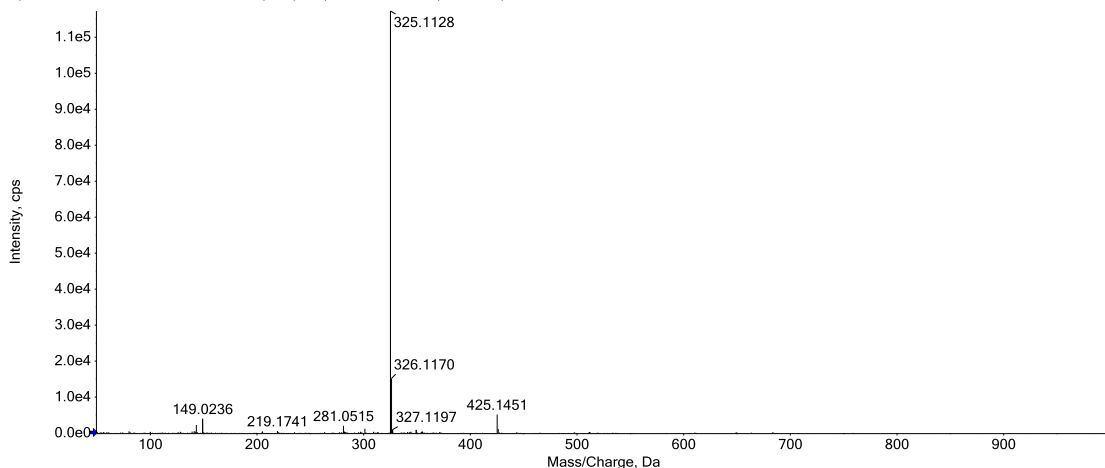

Spectrum from MASS202111173.wiff2 (sample 3) - Y3, +TOF MS (50 - 1000) from 0.149 to 0.193 min

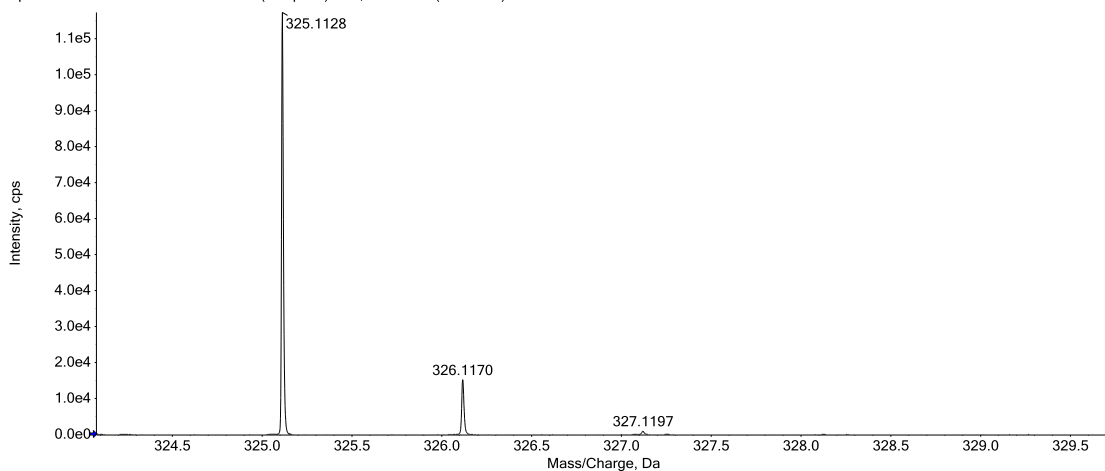

| Hit | Formula   | m/z      | RDB  | ppm  | MS Rank | MSMS ppm | MSMS Rank | Found |
|-----|-----------|----------|------|------|---------|----------|-----------|-------|
| 1   | C22H13FN2 | 325.1136 | 17.0 | -2.3 | 1       |          |           | NA/NA |

# HR-MS spectrum of 6p

Spectrum from MASS202111173.wiff2 (sample 9) - Y9, +TOF MS (50 - 1000) from 0.149 to 0.193 min

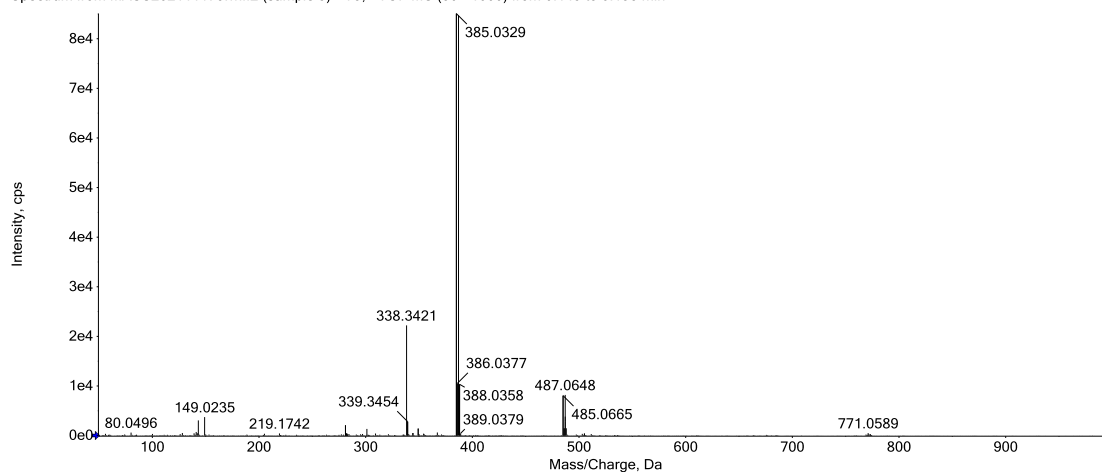

Spectrum from MASS202111173.wiff2 (sample 9) - Y9, +TOF MS (50 - 1000) from 0.149 to 0.193 min

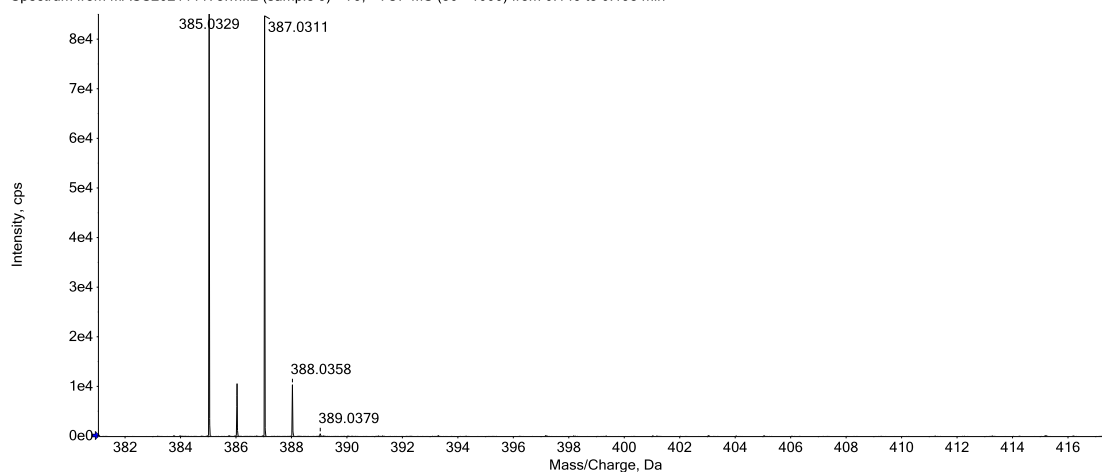

Spectrum from MASS202111173.wiff2 (sample 9) - Y9, +TOF MS (50 - 1000) from 0.149 to 0.193 min

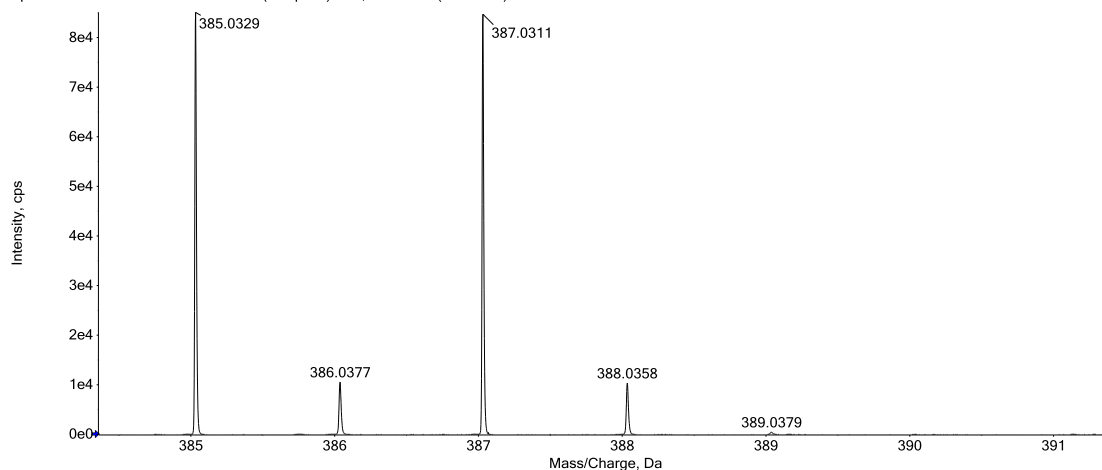

| Hit | Formula    | m/z      | RDB  | ppm  | MS Rank | MSMS ppm | MSMS Rank | Found |
|-----|------------|----------|------|------|---------|----------|-----------|-------|
| 1   | C22H13BrN2 | 385.0335 | 17.0 | -1.5 | 1       |          |           | NA/NA |

# HR-MS spectrum of 6q

Spectrum from MASS202111173.wiff2 (sample 11) - Y11, +TOF MS (50 - 1000) from 0.149 to 0.193 min

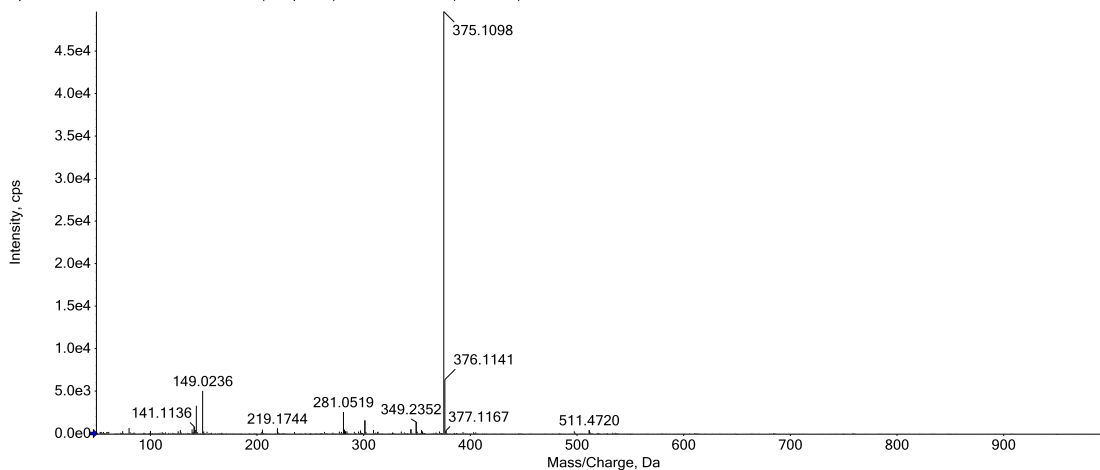

Spectrum from MASS202111173.wiff2 (sample 11) - Y11, +TOF MS (50 - 1000) from 0.149 to 0.193 min

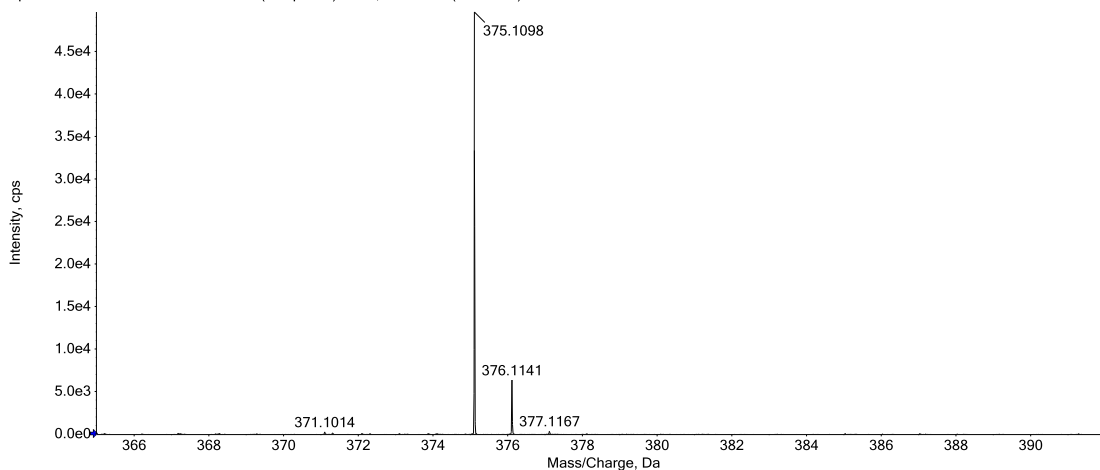

Spectrum from MASS202111173.wiff2 (sample 11) - Y11, +TOF MS (50 - 1000) from 0.149 to 0.193 min

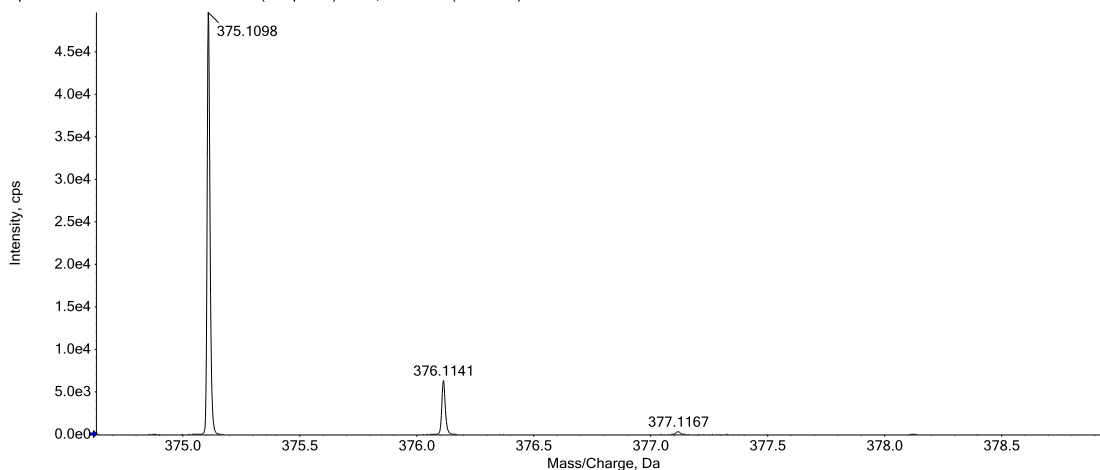

| Hit | Formula    | m/z      | RDB  | ppm  | MS Rank | MSMS ppm | MSMS Rank | Found |
|-----|------------|----------|------|------|---------|----------|-----------|-------|
| 1   | C23H13F3N2 | 375.1104 | 17.0 | -1.5 | 1       |          |           | NA/NA |

HR-MS spectrum of 6r

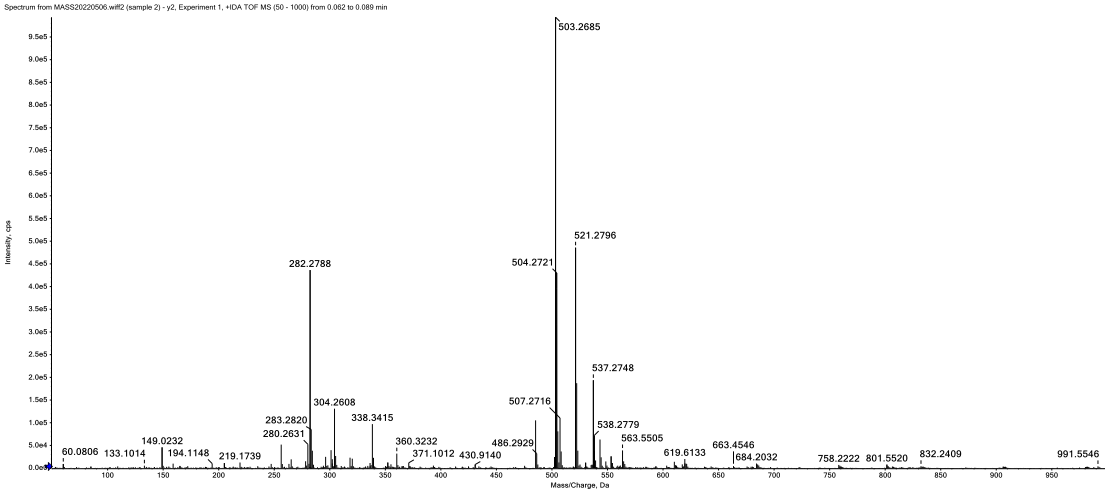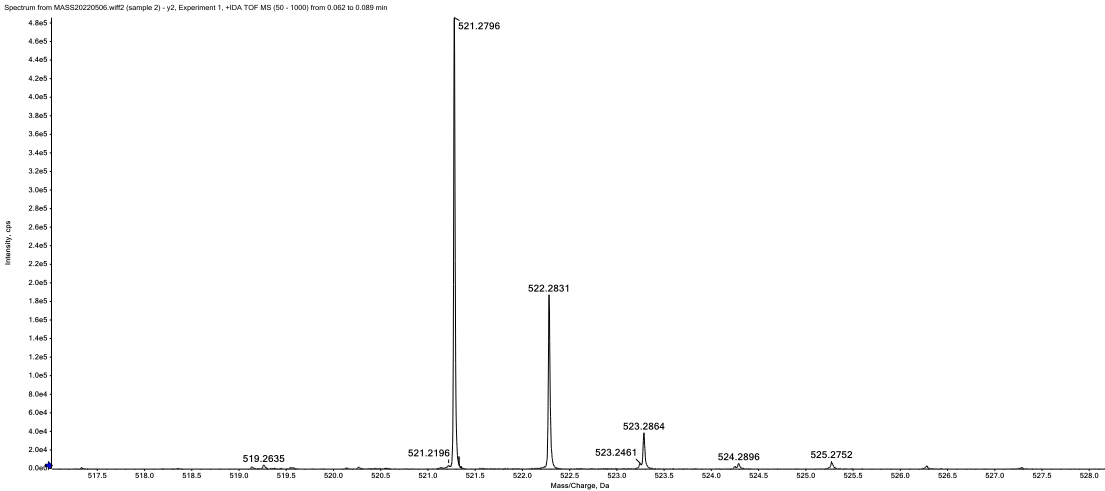

| Hit | Formula    | m/z       | RDB   | ppm   | MS Rank | MSMS ppm | MSMS Rank | Found |
|-----|------------|-----------|-------|-------|---------|----------|-----------|-------|
| 1   | C34H36N2O3 | 521. 2799 | 18. 0 | -0. 5 | 1       |          |           | NA/NA |

HR-MS spectrum of 6s

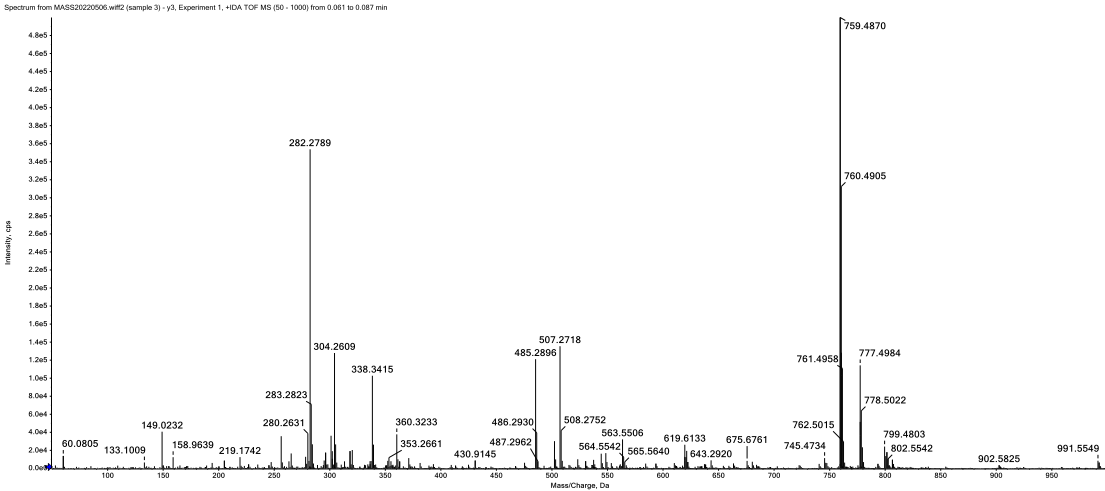

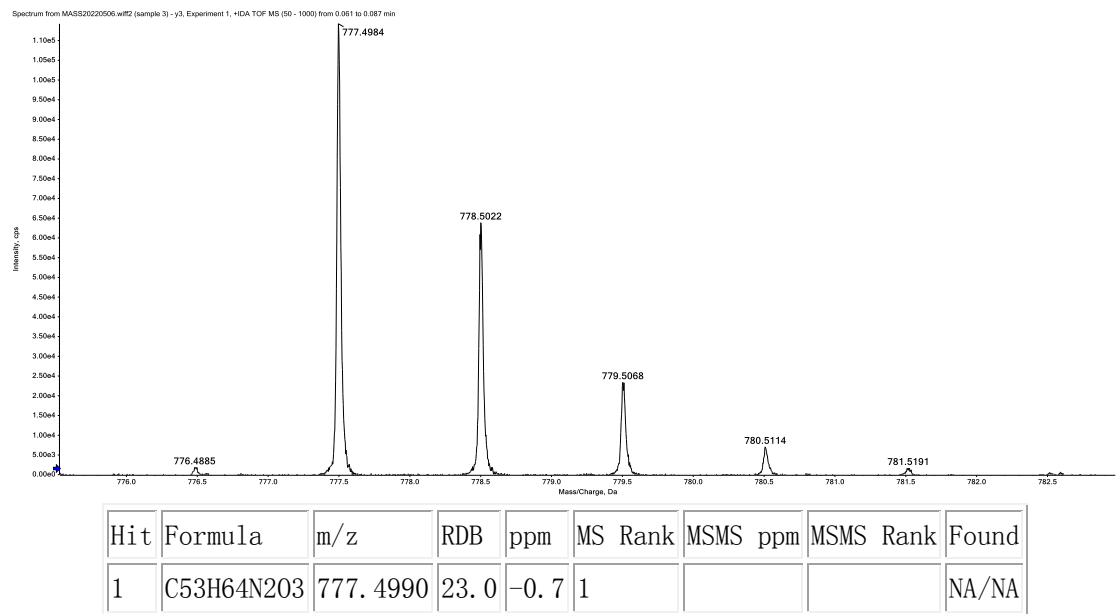

## HR-MS spectrum of 6t

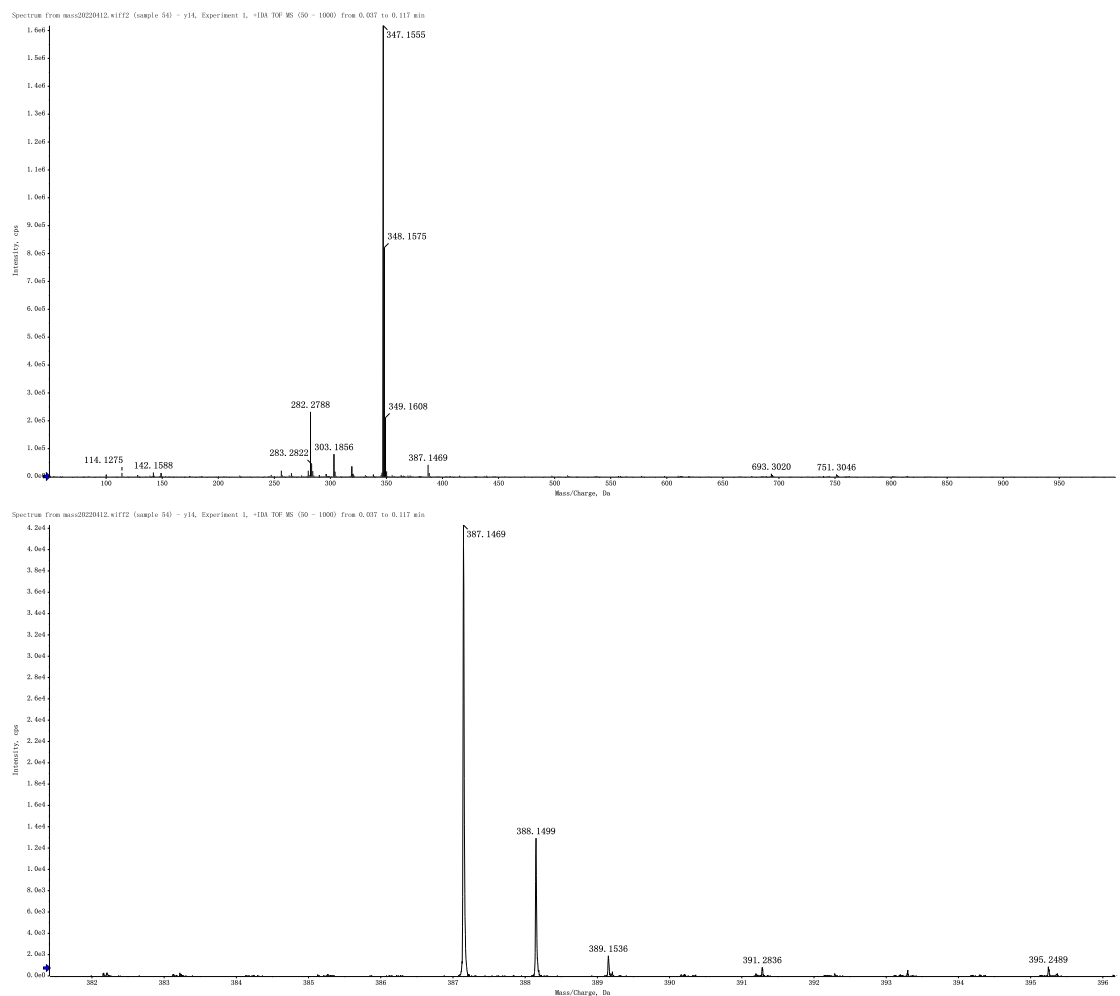

## HR-MS spectrum of 6u

Spectrum from MASS202111173.wiff2 (sample 15) - Y15, +TOF MS (50 - 1000) from 0.149 to 0.193 min

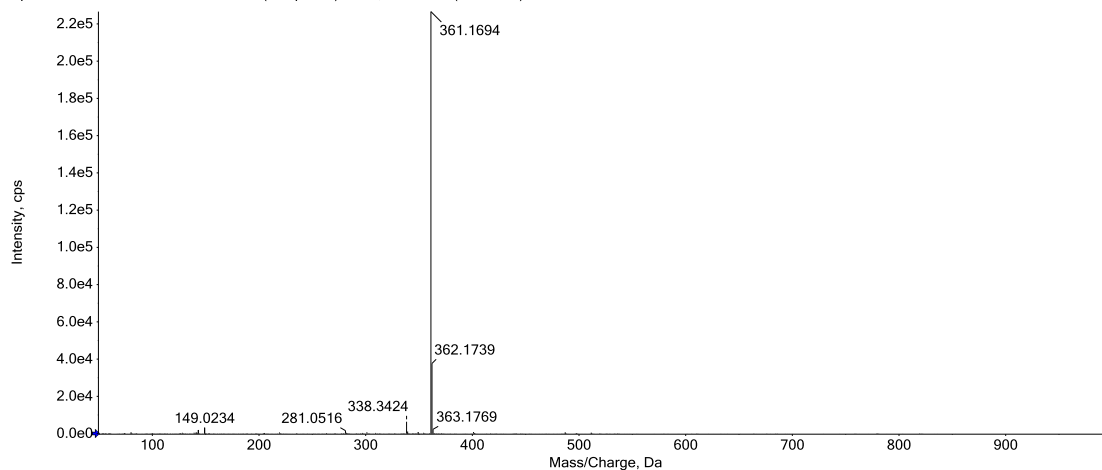

Spectrum from MASS202111173.wiff2 (sample 15) - Y15, +TOF MS (50 - 1000) from 0.149 to 0.193 min

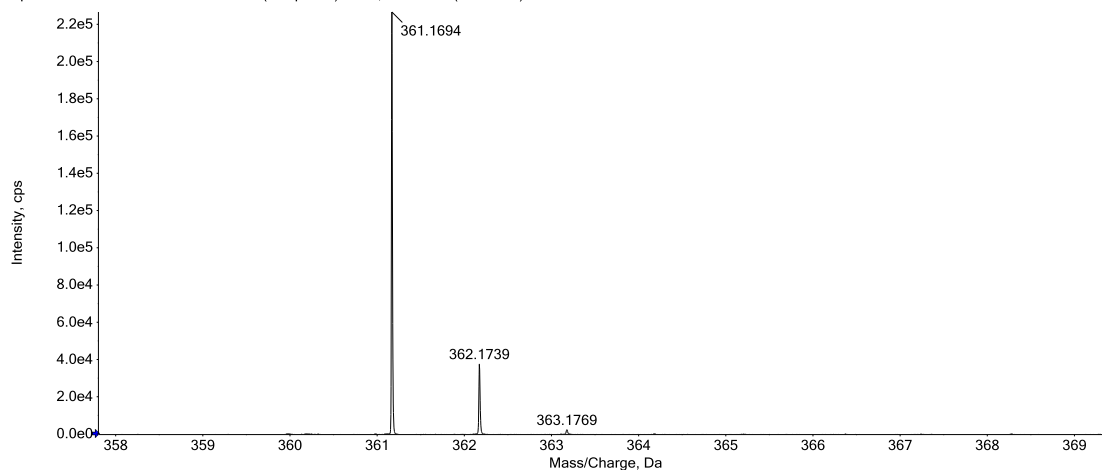

| Hit | Formula                                        | m/z      | RDB  | ppm  | MS Rank | MSMS ppm | MSMS Rank | Found |
|-----|------------------------------------------------|----------|------|------|---------|----------|-----------|-------|
| 1   | C <sub>26</sub> H <sub>20</sub> N <sub>2</sub> | 361.1699 | 18.0 | -1.5 | 1       |          |           | NA/NA |

## HR-MS spectrum of 7a

Spectrum from MASS20211013.wiff2 (sample 37) - Y13, +TOF MS (50 - 1000) from 0.044 to 0.114 min

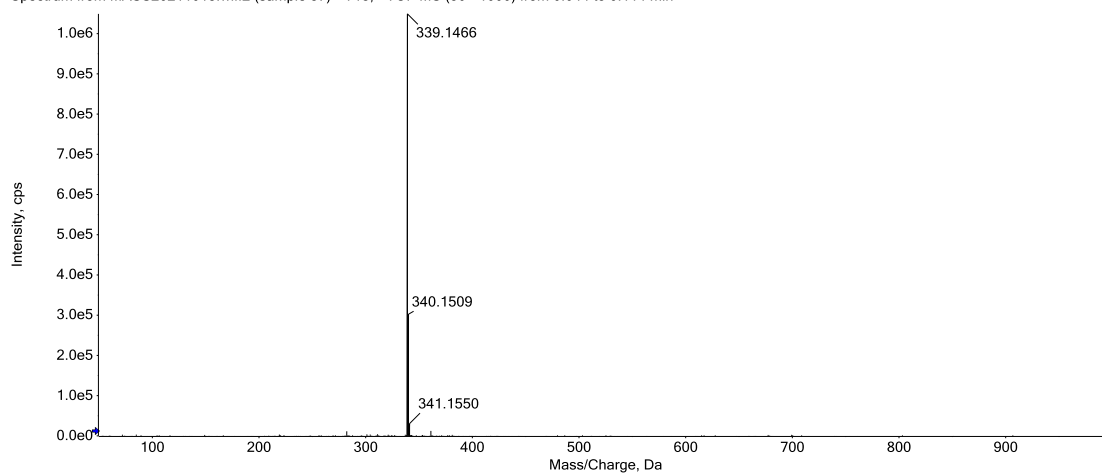

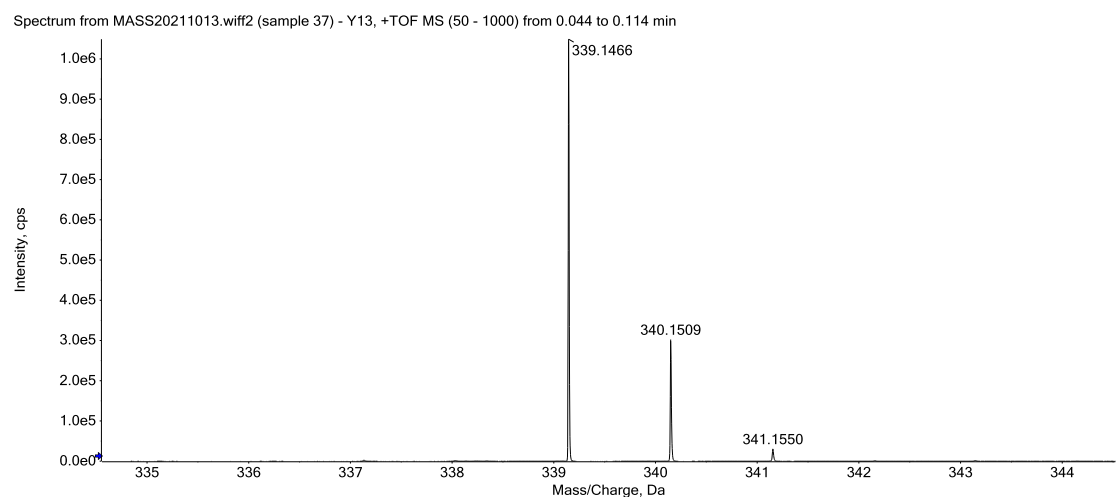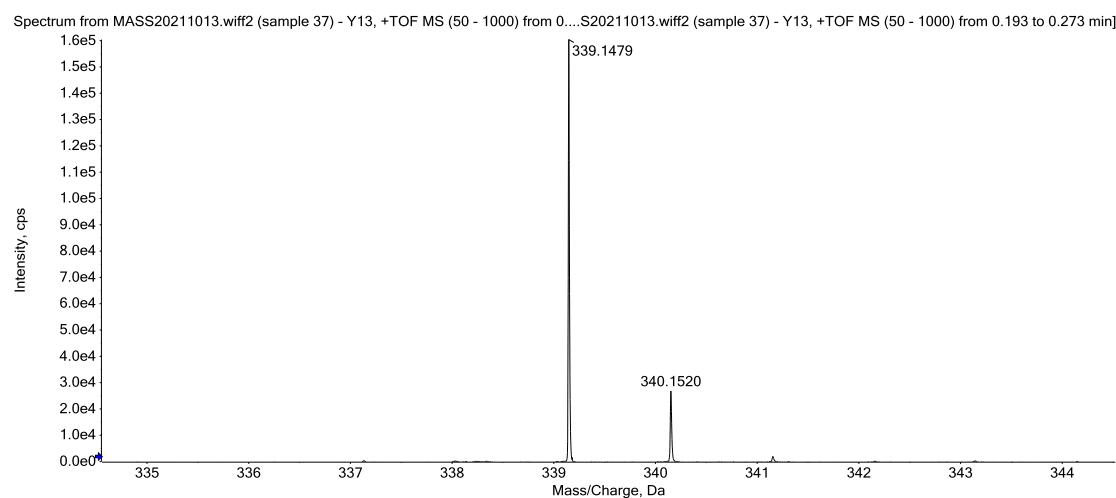

| Hit | Formula   | m/z      | RDB  | ppm  | MS Rank | MSMS ppm | MSMS Rank | Found |
|-----|-----------|----------|------|------|---------|----------|-----------|-------|
| 1   | C23H18N2O | 339.1492 | 16.0 | -3.8 | 1       |          |           | NA/NA |

## HR-MS spectrum of 7b

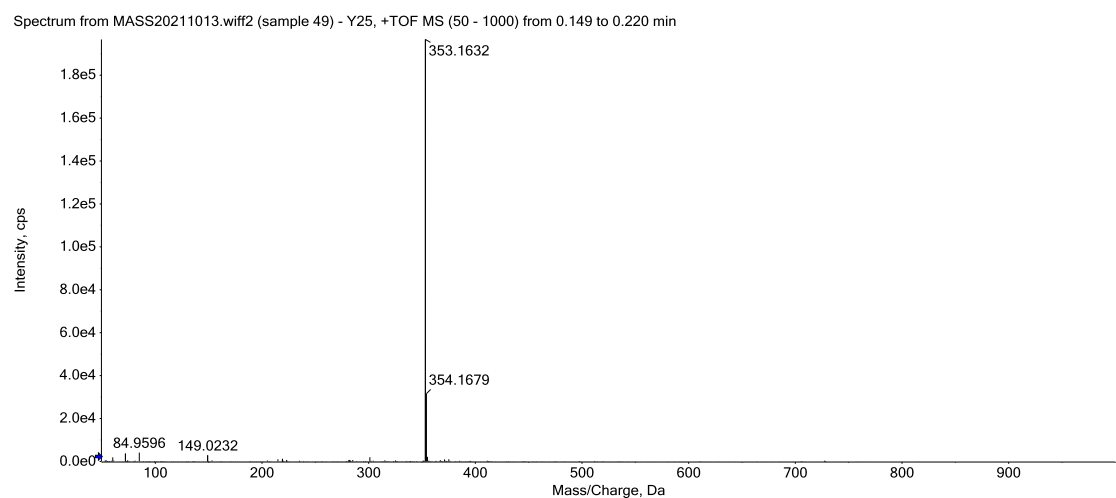

Spectrum from MASS20211013.wiff2 (sample 49) - Y25, +TOF MS (50 - 1000) from 0.149 to 0.220 min

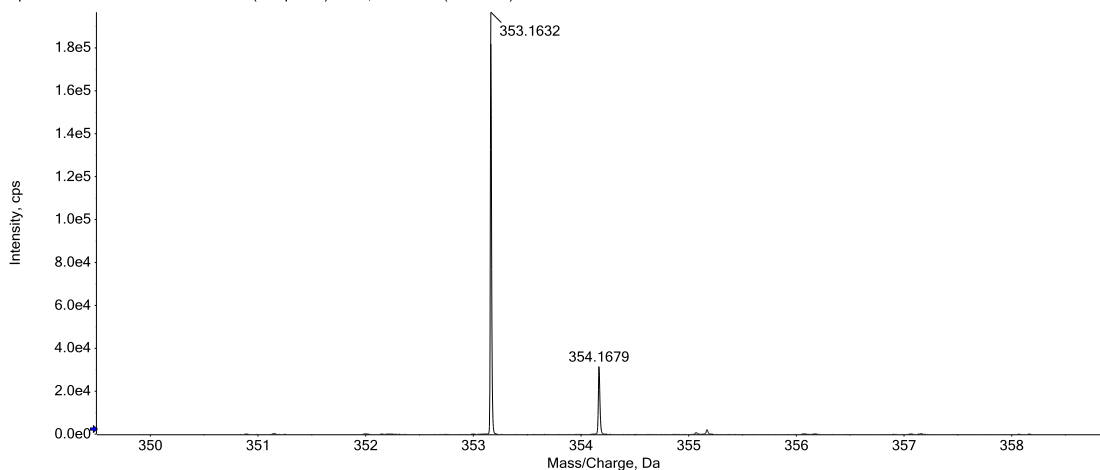

| Hit | Formula                                          | m/z      | RDB  | ppm  | MS Rank | MSMS ppm | MSMS Rank | Found |
|-----|--------------------------------------------------|----------|------|------|---------|----------|-----------|-------|
| 1   | C <sub>24</sub> H <sub>20</sub> N <sub>2</sub> O | 353.1648 | 16.0 | -4.6 | 1       |          |           | NA/NA |

## HR-MS spectrum of 7c

Spectrum from MASS20211013.wiff2 (sample 45) - Y21, +TOF MS (50 - 1000) from 0.114 to 0.184 min

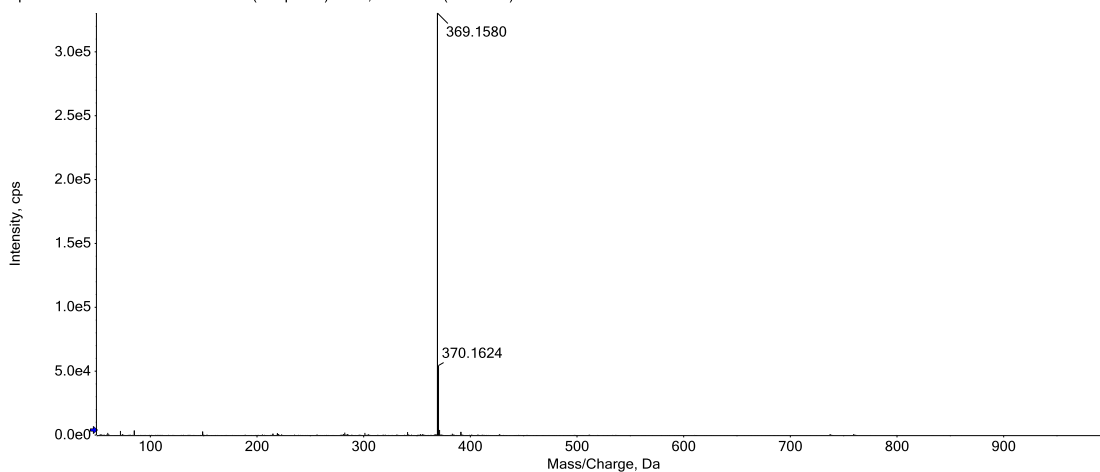

Spectrum from MASS20211013.wiff2 (sample 45) - Y21, +TOF MS (50 - 1000) from 0.114 to 0.184 min

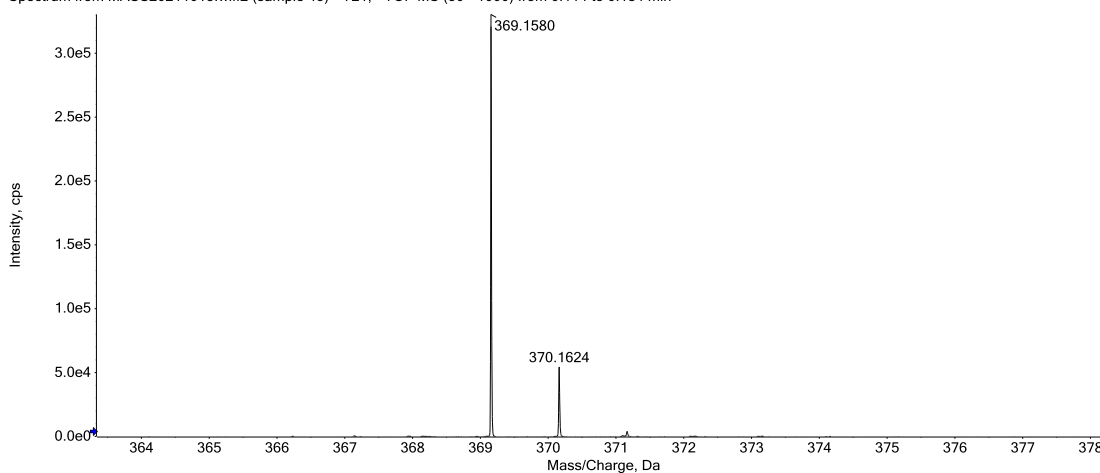



Spectrum from MASS20211013.wiff2 (sample 45) - Y21, +TOF MS (50 - 1000) from 0.290 to 0.369 min]

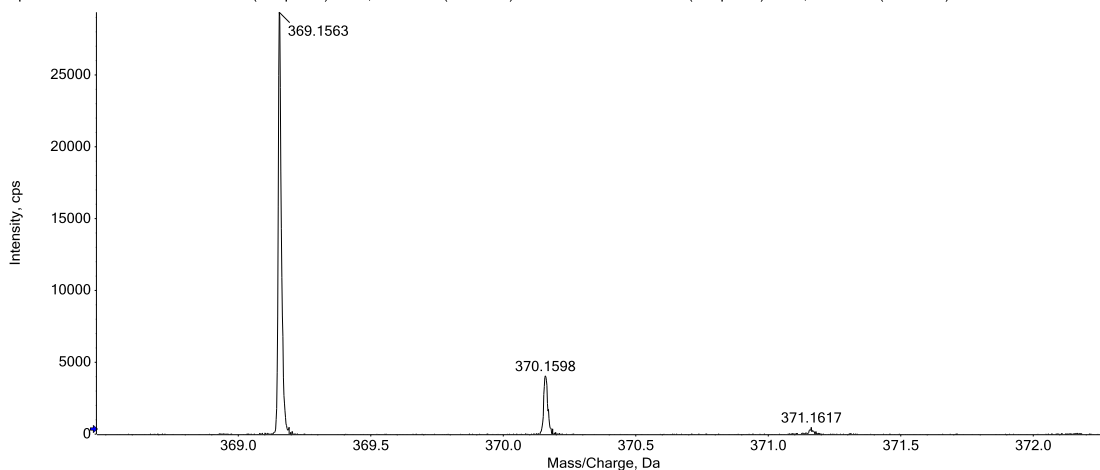

| Hit | Formula                                                       | m/z      | RDB  | ppm  | MS Rank | MSMS ppm | MSMS Rank | Found |
|-----|---------------------------------------------------------------|----------|------|------|---------|----------|-----------|-------|
| 1   | C <sub>24</sub> H <sub>20</sub> N <sub>2</sub> O <sub>2</sub> | 369.1598 | 16.0 | -4.2 | 1       |          |           | NA/NA |

## HR-MS spectrum of 7d

Spectrum from MASS20211013.wiff2 (sample 43) - Y19, +TOF MS (50 - 1000) from 0.114 to 0.184 min

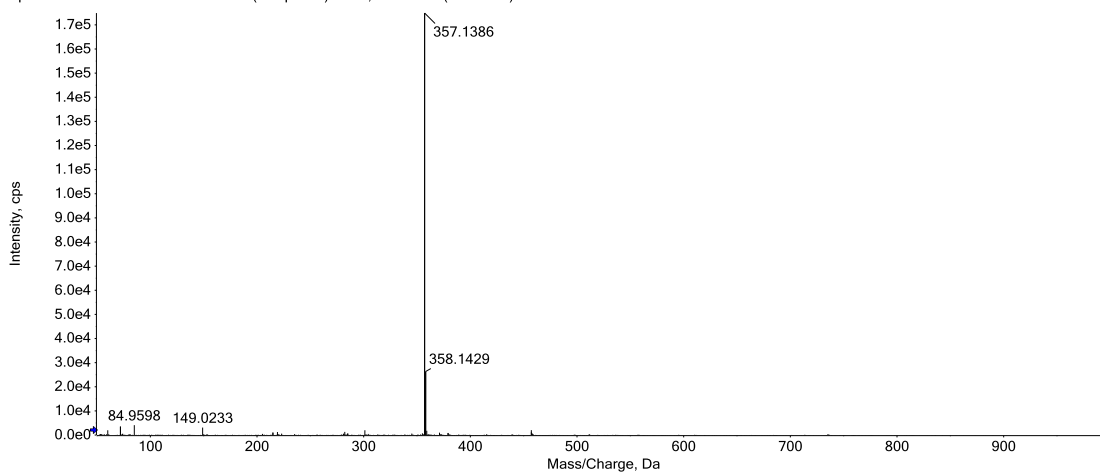

Spectrum from MASS20211013.wiff2 (sample 43) - Y19, +TOF MS (50 - 1000) from 0.114 to 0.184 min

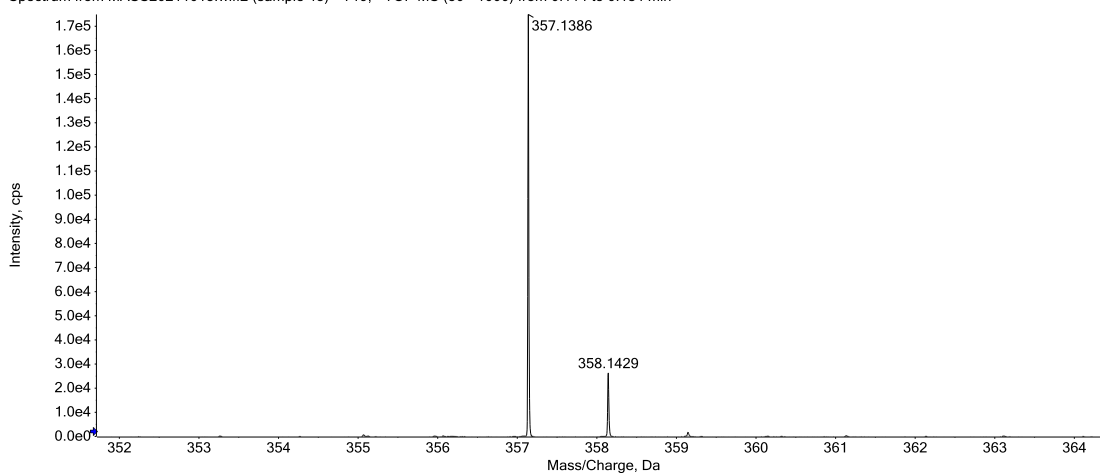

| Hit | Formula                                           | m/z      | RDB  | ppm  | MS Rank | MSMS ppm | MSMS Rank | Found |
|-----|---------------------------------------------------|----------|------|------|---------|----------|-----------|-------|
| 1   | C <sub>23</sub> H <sub>17</sub> FN <sub>2</sub> O | 357.1398 | 16.0 | -3.3 | 1       |          |           | NA/NA |

## HR-MS spectrum of 7e

Spectrum from MASS20211013.wiff2 (sample 53) - Y29, +TOF MS (50 - 1000) from 0.149 to 0.220 min

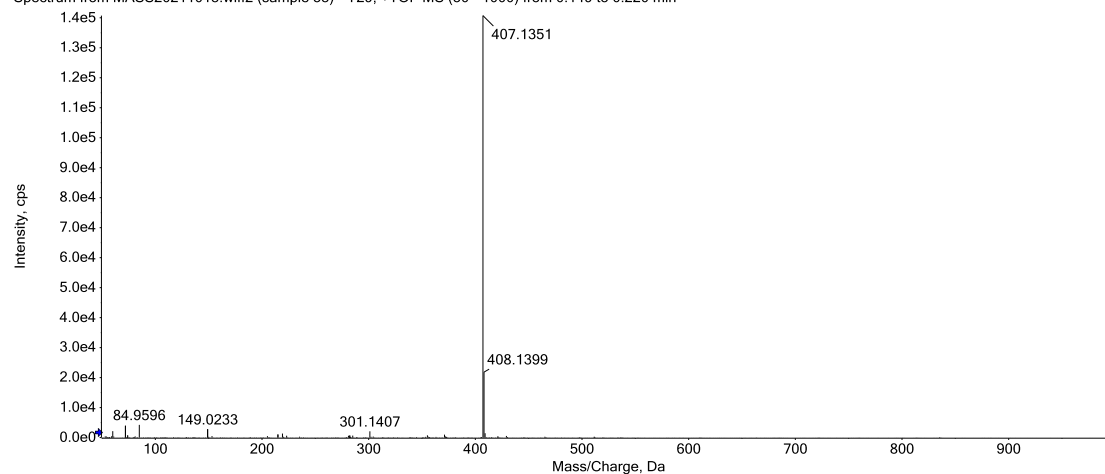

Spectrum from MASS20211013.wiff2 (sample 53) - Y29, +TOF MS (50 - 1000) from 0.149 to 0.220 min

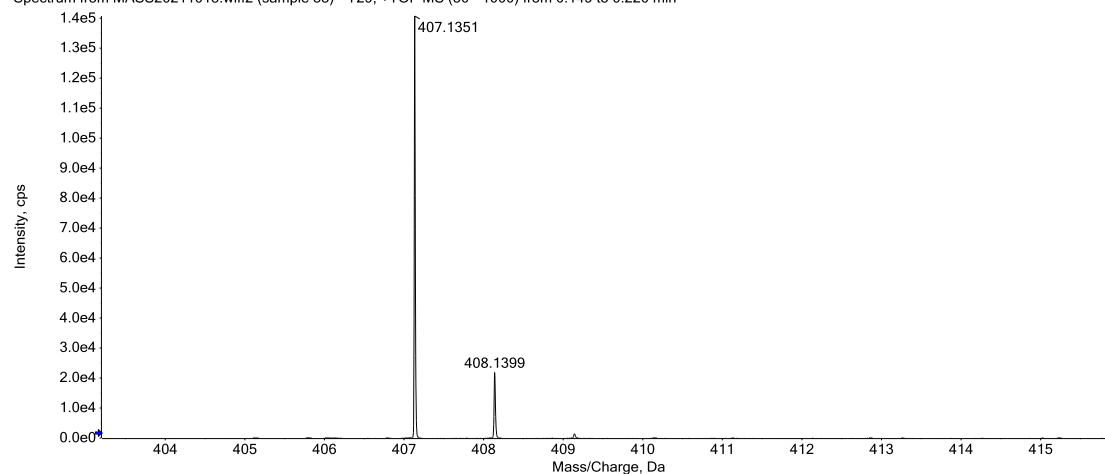

| Hit | Formula                                                         | m/z      | RDB  | ppm  | MS Rank | MSMS ppm | MSMS Rank | Found |
|-----|-----------------------------------------------------------------|----------|------|------|---------|----------|-----------|-------|
| 1   | C <sub>24</sub> H <sub>17</sub> F <sub>3</sub> N <sub>2</sub> O | 407.1366 | 16.0 | -3.6 | 1       |          |           | NA/NA |

## HR-MS spectrum of 7f

Spectrum from MASS20211013.wiff2 (sample 47) - Y23, +TOF MS (50 - 1000) from 0.149 to 0.220 min

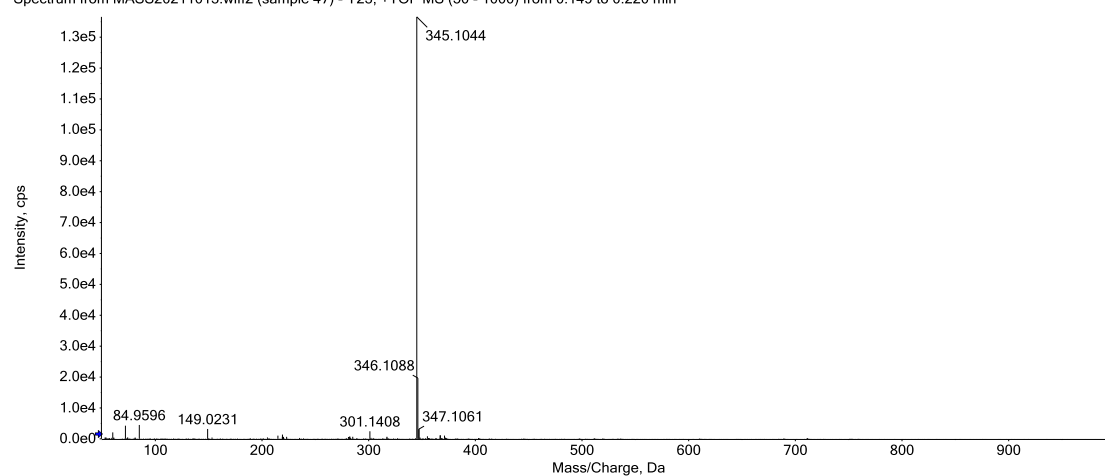

Spectrum from MASS20211013.wiff2 (sample 47) - Y23, +TOF MS (50 - 1000) from 0.149 to 0.220 min

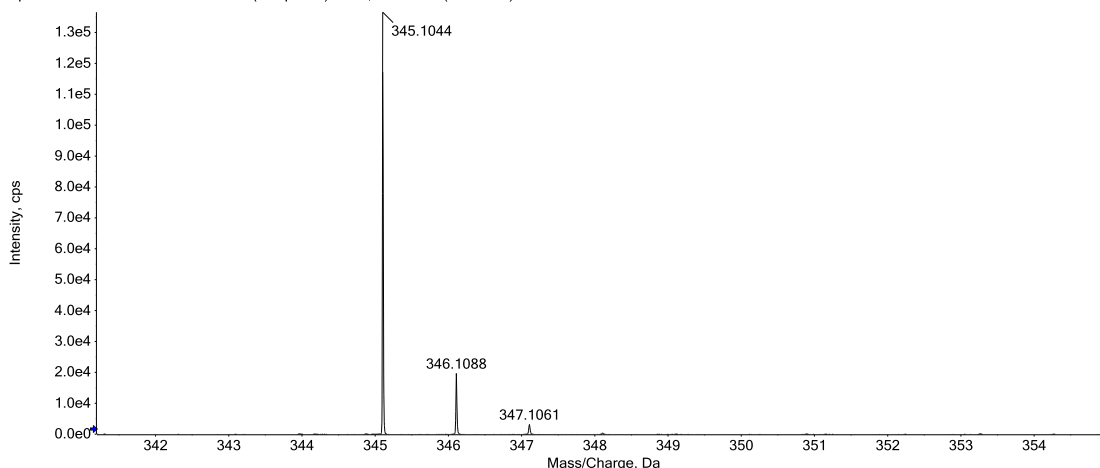

| Hit | Formula                                                       | m/z      | RDB  | ppm  | MS Rank | MSMS ppm | MSMS Rank | Found |
|-----|---------------------------------------------------------------|----------|------|------|---------|----------|-----------|-------|
| 1   | C <sub>21</sub> H <sub>16</sub> N <sub>2</sub> O <sub>5</sub> | 345.1056 | 15.0 | -3.5 | 1       |          |           | NA/NA |

## HR-MS spectrum of 7g

Spectrum from MASS20210609.wiff2 (sample 66) - Y19, +TOF MS (50 - 1000) from 0.079 to 0.114 min

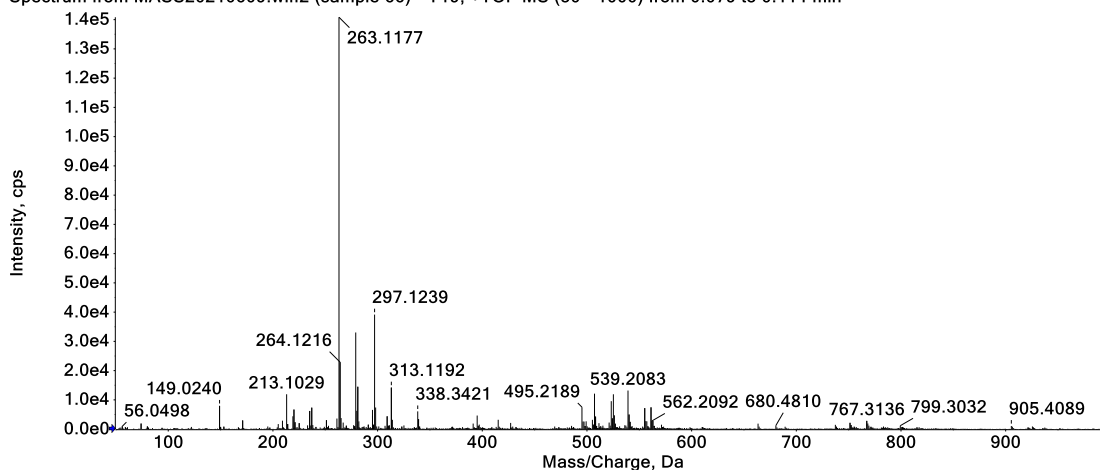

Spectrum from MASS20210609.wiff2 (sample 66) - Y19, +TOF MS (50 - 1000) from 0.079 to 0.114 min

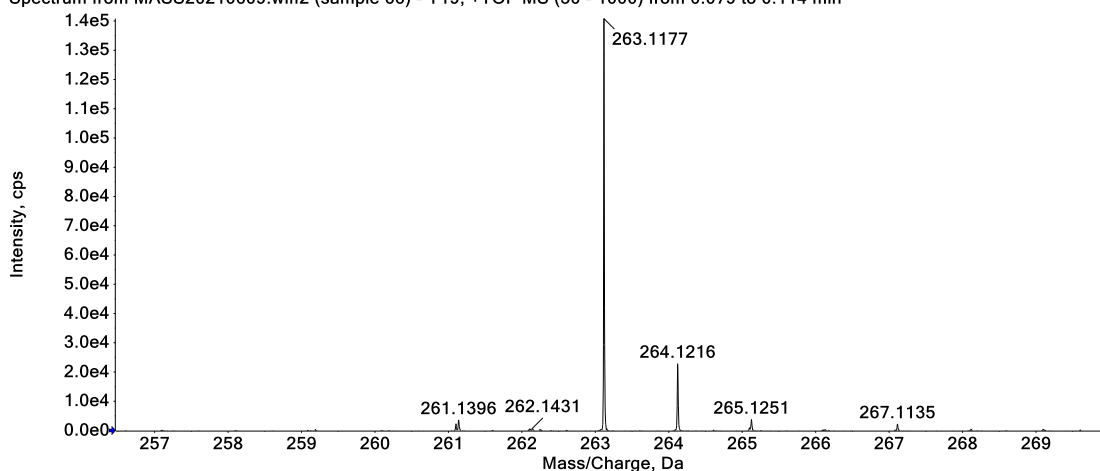

Spectrum from MASS20210609.wiff2 (sample 66) - Y19, +TOF MS (50 - 1000) from 0.079 to 0.114 min

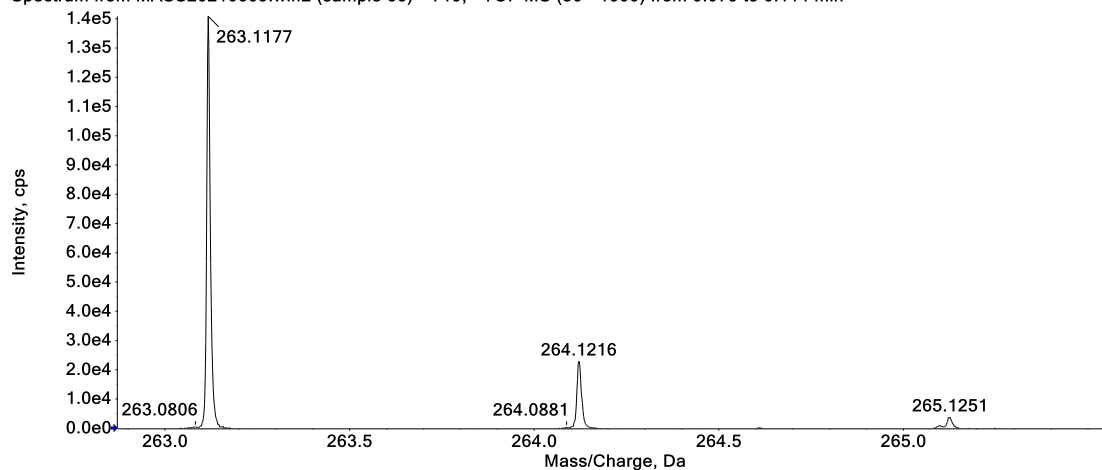

| Hit | Formula                                          | m/z      | RDB  | ppm  | MS Rank | MSMS ppm | MSMS Rank | Found |
|-----|--------------------------------------------------|----------|------|------|---------|----------|-----------|-------|
| 1   | C <sub>17</sub> H <sub>14</sub> N <sub>2</sub> O | 263.1179 | 12.0 | -0.7 | 1       |          |           | NA/NA |

## HR-MS spectrum of 7h

Spectrum from MASS20220916-LGQ.wiff2 (sample 3) - Y3, Experiment 1, +IDA TOF MS (50 - 1000) from 0.048 to 0.082 min

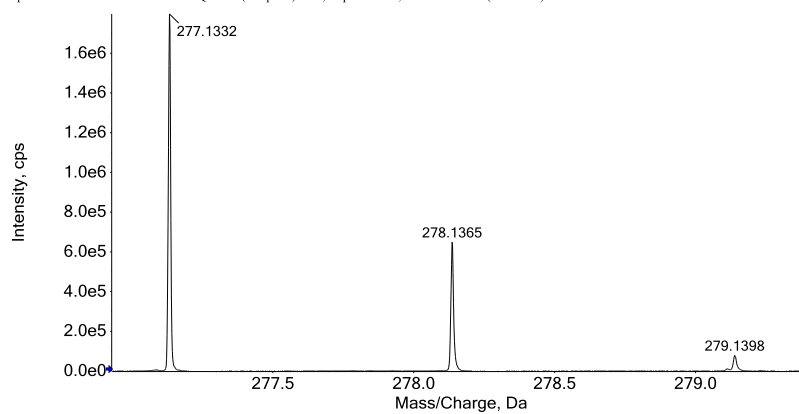

| Hit | Formula                                          | m/z      | RDB  | ppm  | MS Rank | MSMS ppm | MSMS Rank | Found |
|-----|--------------------------------------------------|----------|------|------|---------|----------|-----------|-------|
| 1   | C <sub>18</sub> H <sub>16</sub> N <sub>2</sub> O | 277.1335 | 12.0 | -1.2 | 1       |          |           | NA/NA |

## HR-MS spectrum of 7h'

Spectrum from MASS20220916-LGQ.wiff2 (sample 4) - Y4, Experiment 1, +IDA TOF MS (50 - 1000) from 0.048 to 0.081 min

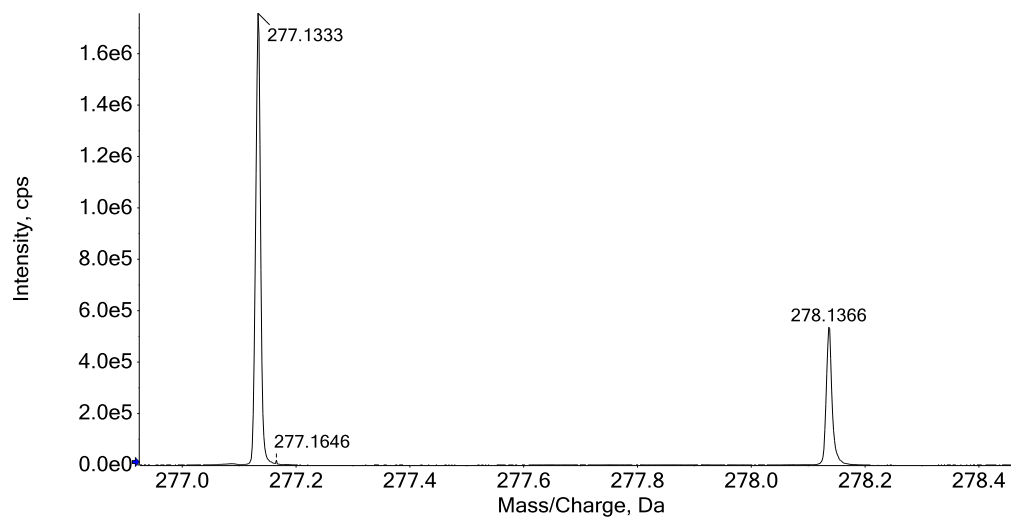

## HR-MS spectrum of 7i

Spectrum from MASS202111173.wiff2 (sample 8) - Y8, +TOF MS (50 - 1000) from 0.149 to 0.193 min

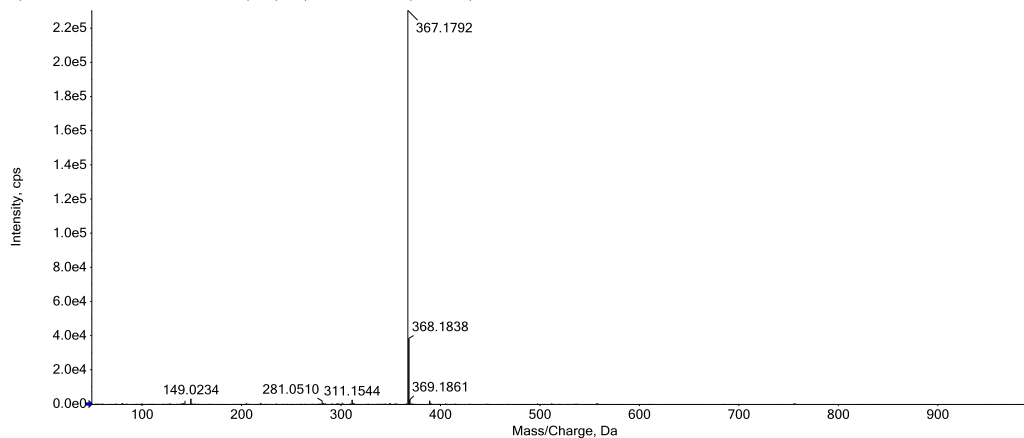

Spectrum from MASS202111173.wiff2 (sample 8) - Y8, +TOF MS (50 - 1000) from 0.149 to 0.193 min

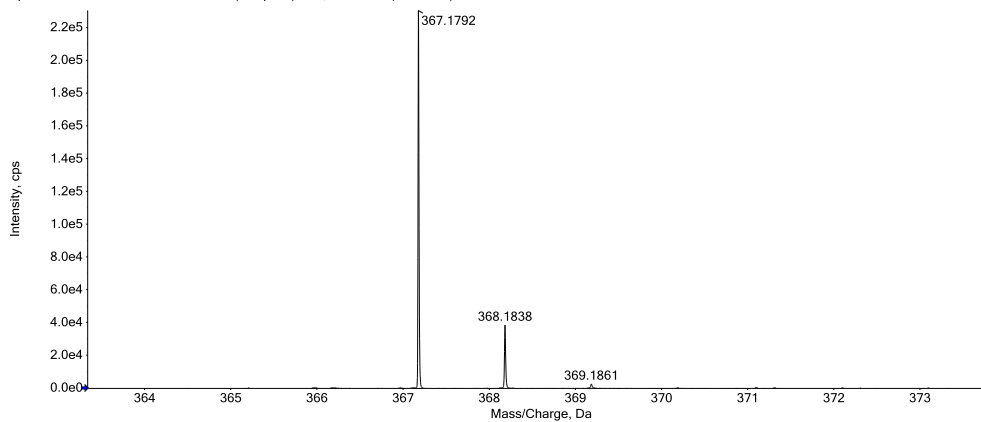

| Hit | Formula   | m/z      | RDB  | ppm  | MS Rank | MSMS ppm | MSMS Rank | Found |
|-----|-----------|----------|------|------|---------|----------|-----------|-------|
| 1   | C25H22N2O | 367.1805 | 16.0 | -3.5 | 1       |          |           | NA/NA |

HR-MS spectrum of 7j

Spectrum from MASS20211013.wiff2 (sample 51) - Y27, +TOF MS (50 - 1000) from 0.149 to 0.220 min

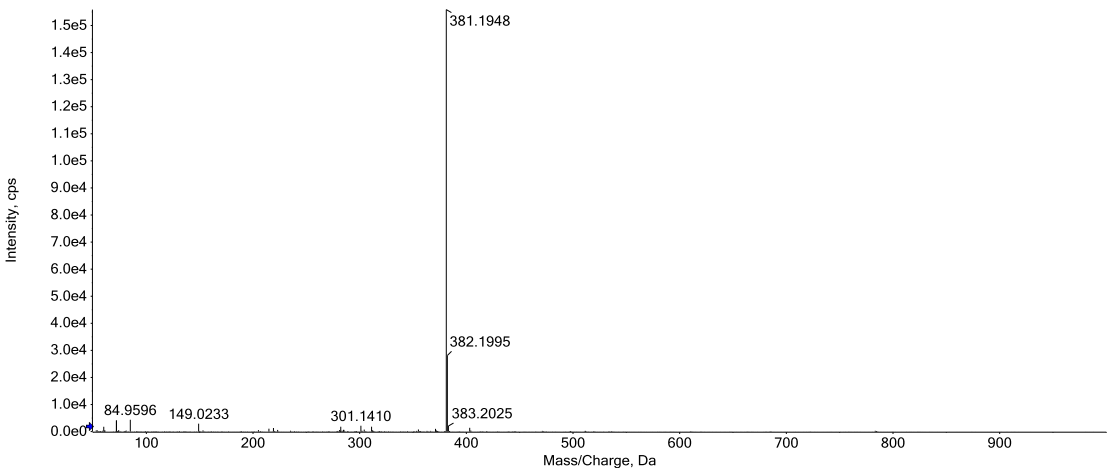

Spectrum from MASS20211013.wiff2 (sample 51) - Y27, +TOF MS (50 - 1000) from 0.149 to 0.220 min

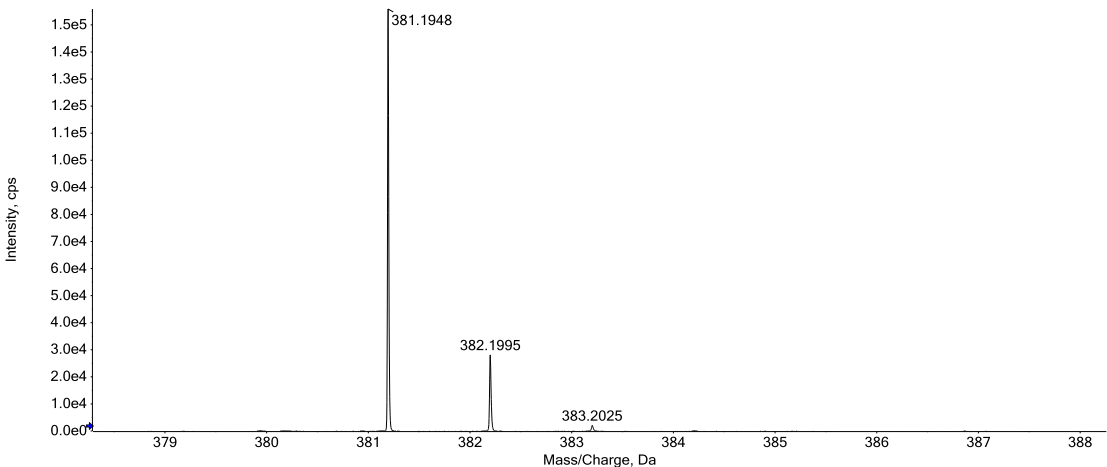

| Hit | Formula   | m/z      | RDB  | ppm  | MS Rank | MSMS ppm | MSMS Rank | Found |
|-----|-----------|----------|------|------|---------|----------|-----------|-------|
| 1   | C26H24N2O | 381.1961 | 16.0 | -3.5 | 1       |          |           | NA/NA |

HR-MS spectrum of 7k

Spectrum from MASS202111173.wiff2 (sample 6) - Y6, +TOF MS (50 - 1000) from 0.149 to 0.193 min

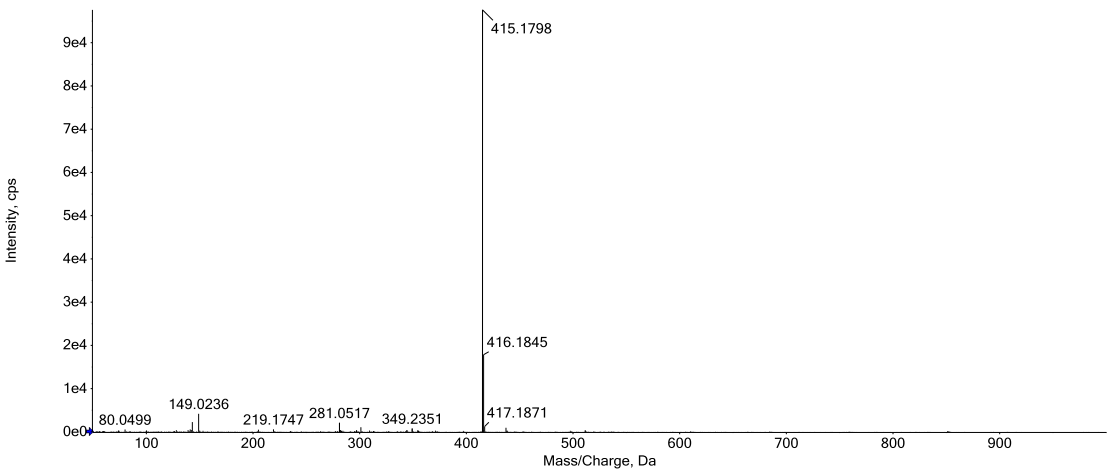

Spectrum from MASS202111173.wiff2 (sample 6) - Y6, +TOF MS (50 - 1000) from 0.149 to 0.193 min

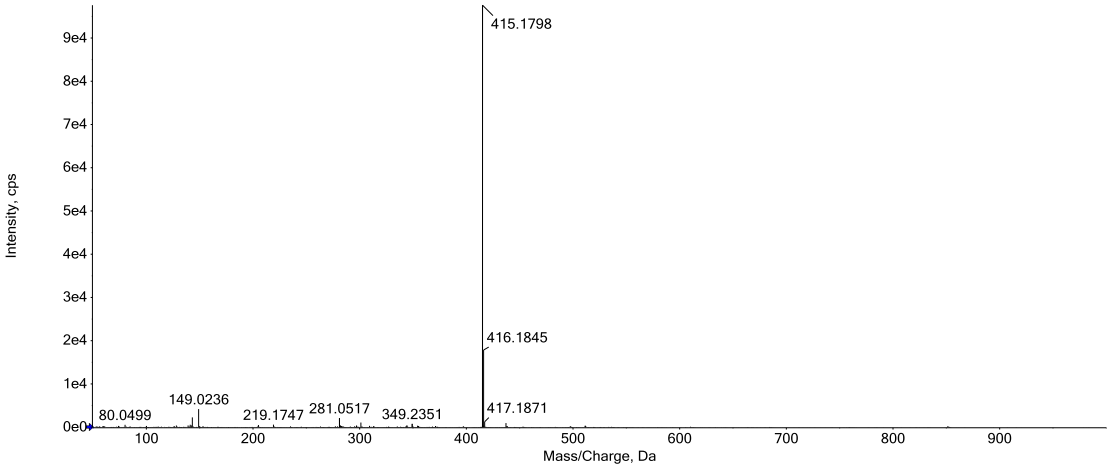

Spectrum from MASS202111173.wiff2 (sample 6) - Y6, +TOF MS (50 - 1000) from 0.149 to 0.193 min

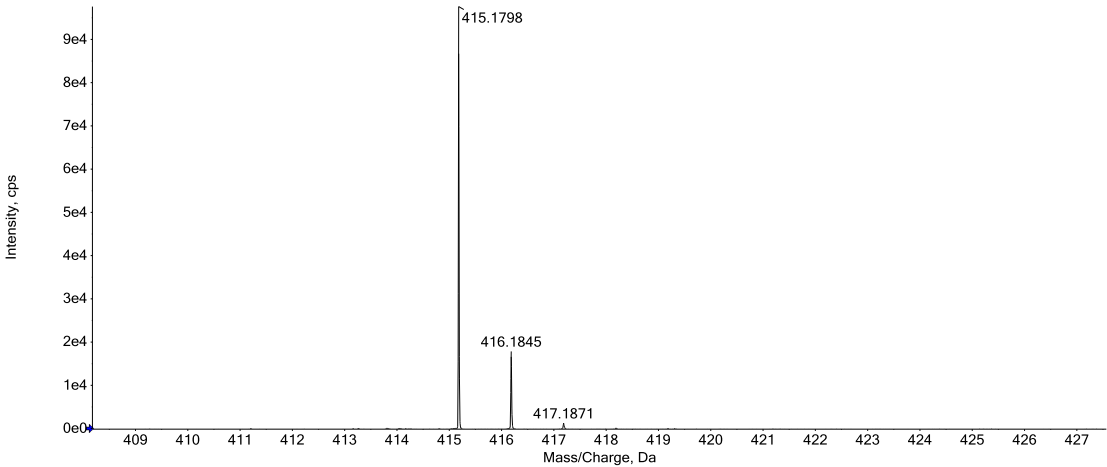

| Hit | Formula   | m/z       | RDB   | ppm   | MS Rank | MSMS ppm | MSMS Rank | Found |
|-----|-----------|-----------|-------|-------|---------|----------|-----------|-------|
| 1   | C29H22N2O | 415. 1805 | 20. 0 | -1. 7 | 1       |          |           | NA/NA |

HR-MS spectrum of 71

Spectrum from mass20220112.wiff2 (sample 43) - Y5, Experiment 1, +TOF MS (50 - 1000) from 0.631 to 0.129 min

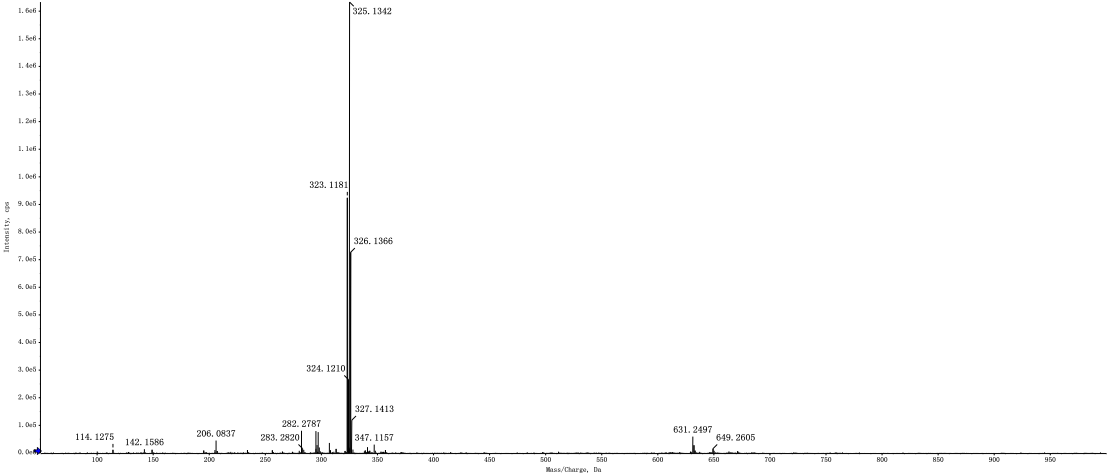

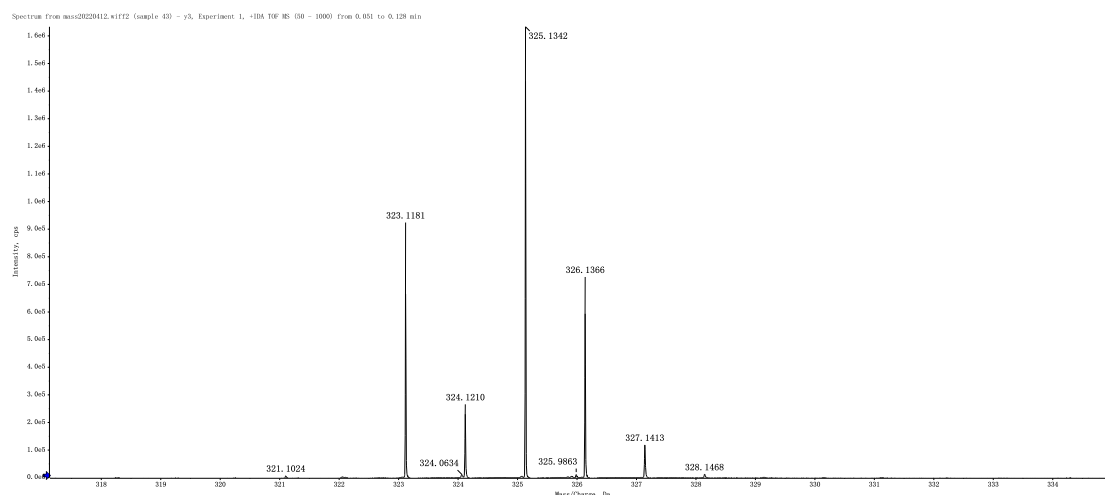

| Hit | Formula   | m/z      | RDB  | ppm | MS Rank | MSMS ppm | MSMS Rank | Found |
|-----|-----------|----------|------|-----|---------|----------|-----------|-------|
| 1   | C22H16N2O | 325.1335 | 16.0 | 2.0 | 1       |          |           | NA/NA |

## HR-MS spectrum of 7m

Spectrum from MASS202111173.wiff2 (sample 14) - Y14, +TOF MS (50 - 1000) from 0.105 to 0.149 min

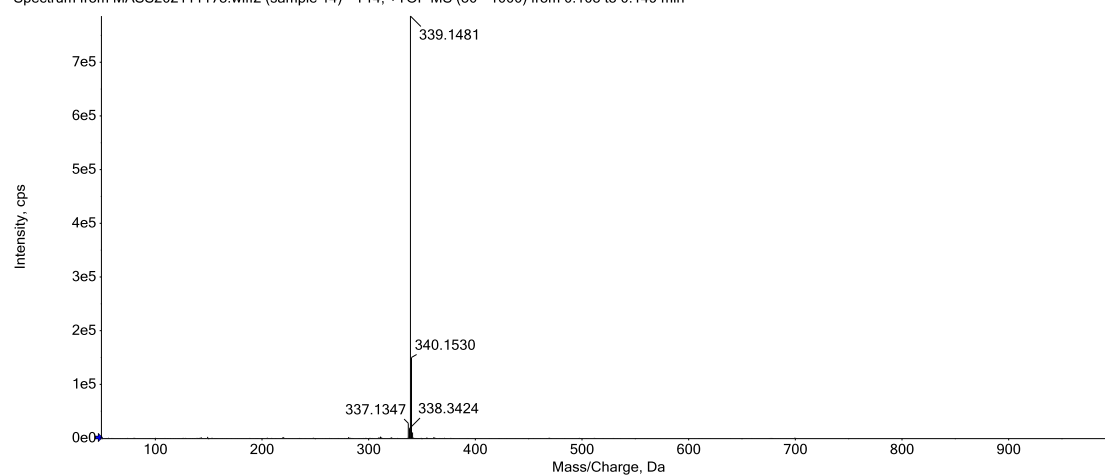

Spectrum from MASS202111173.wiff2 (sample 14) - Y14, +TOF MS (50 - 1000) from 0.105 to 0.149 min

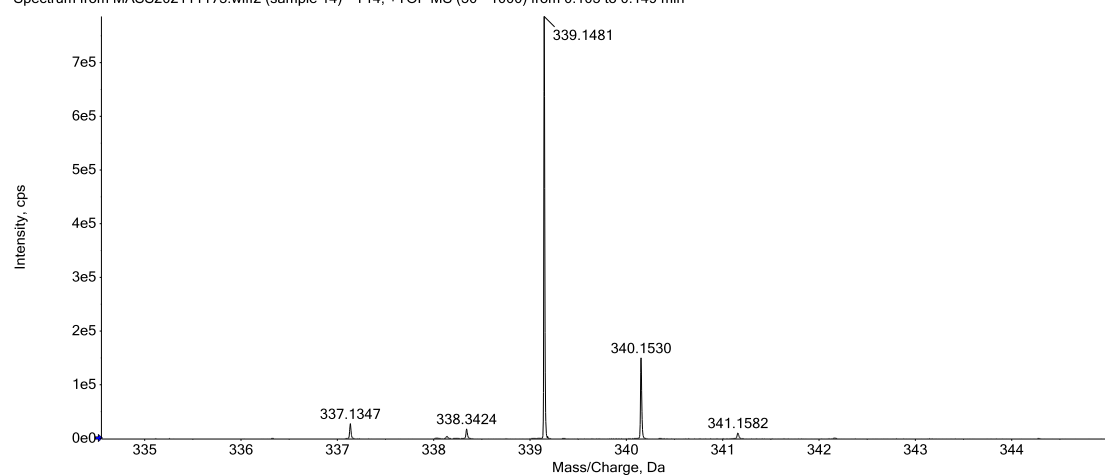



Spectrum from MASS202111173.wiff2 (sample 14) - Y14, +TOF MS (50 - 1000) from 0.105 to 0.149 min

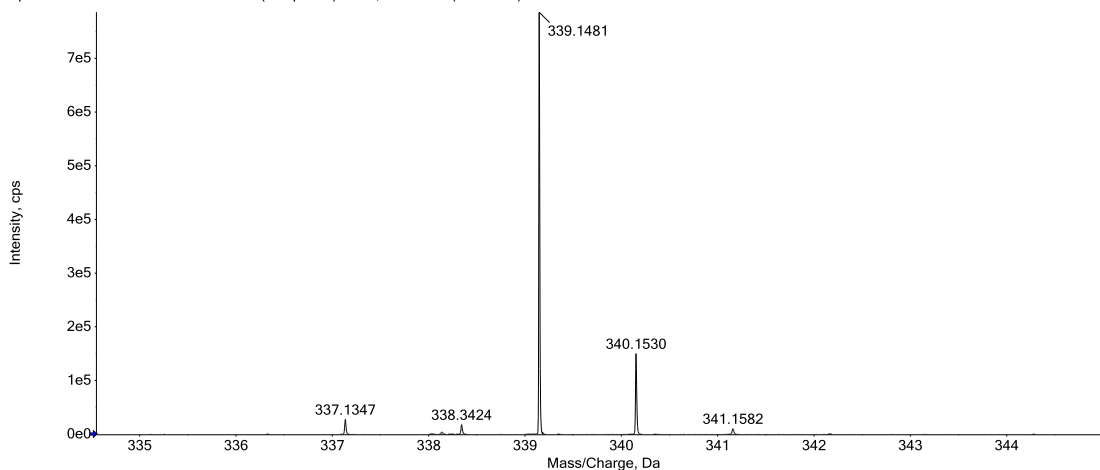

Spectrum from MASS202111173.wiff2 (sample 14) - Y14, +TOF MS (50 - 1000) from 0.237 to 0.299 min]

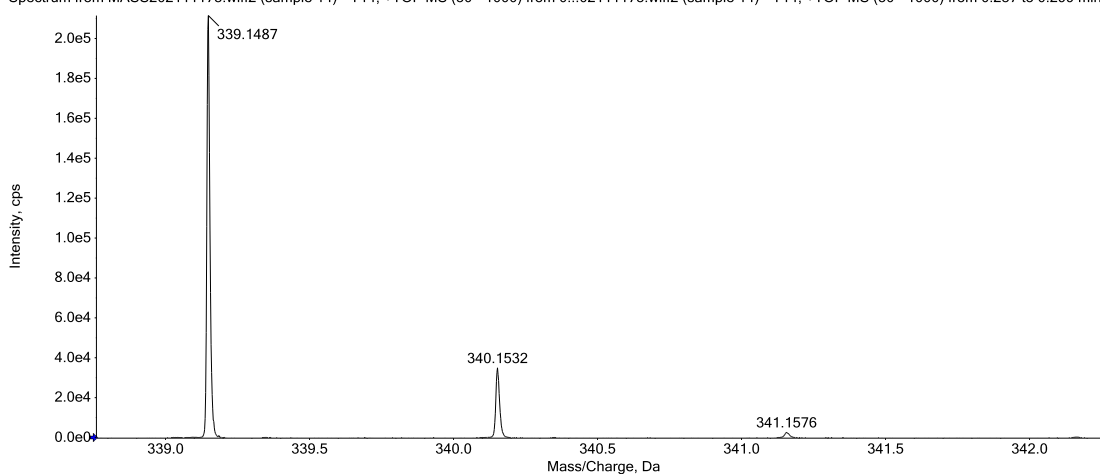

| Hit | Formula                                          | m/z      | RDB  | ppm  | MS Rank | MSMS ppm | MSMS Rank | Found |
|-----|--------------------------------------------------|----------|------|------|---------|----------|-----------|-------|
| 1   | C <sub>23</sub> H <sub>18</sub> N <sub>2</sub> O | 339.1492 | 16.0 | -1.4 | 1       |          |           | NA/NA |

## HR-MS spectrum of 7n

Spectrum from MASS202111173.wiff2 (sample 2) - Y2, +TOF MS (50 - 1000) from 0.096 to 0.140 min

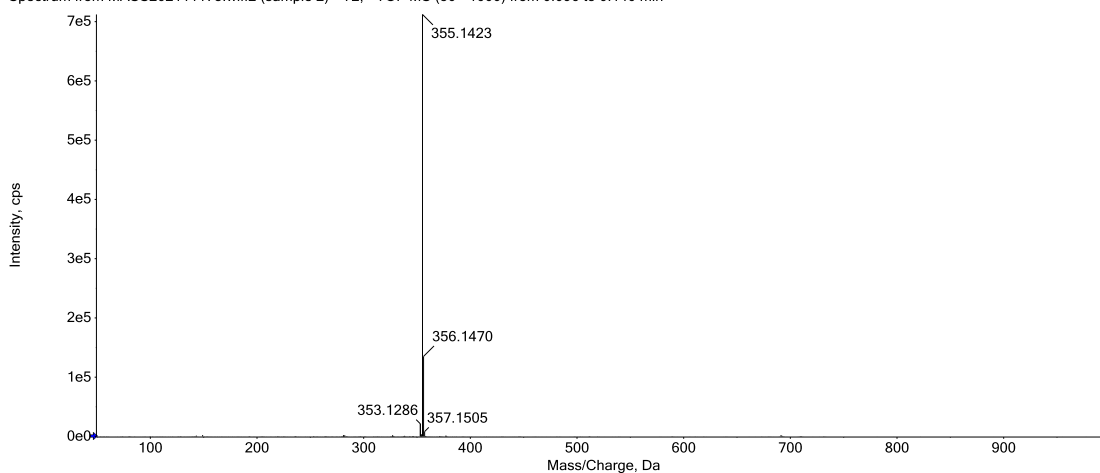

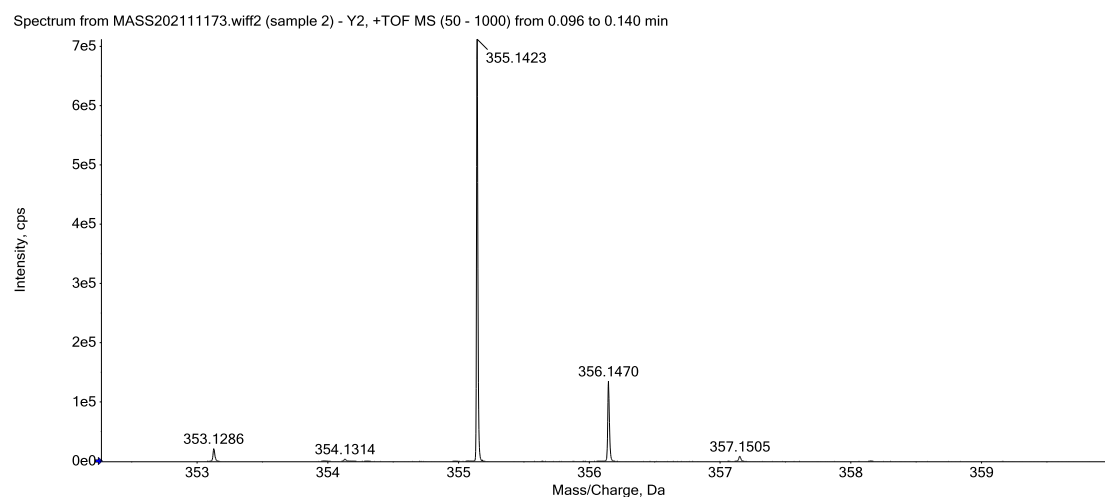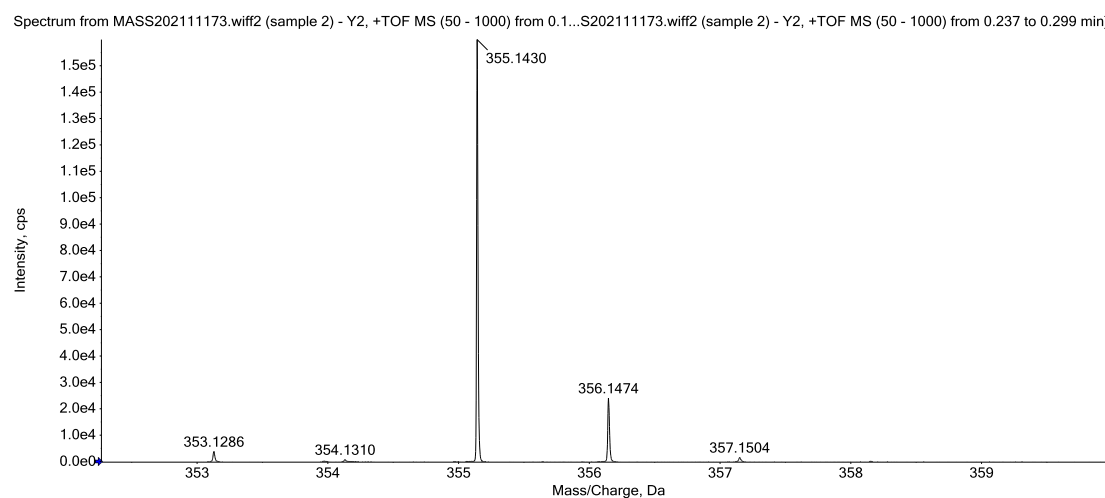

| Hit | Formula    | m/z       | RDB   | ppm   | MS Rank | MSMS ppm | MSMS Rank | Found |
|-----|------------|-----------|-------|-------|---------|----------|-----------|-------|
| 1   | C23H18N2O2 | 355. 1441 | 16. 0 | -3. 1 | 1       |          |           | NA/NA |

## HR-MS spectrum of 7o

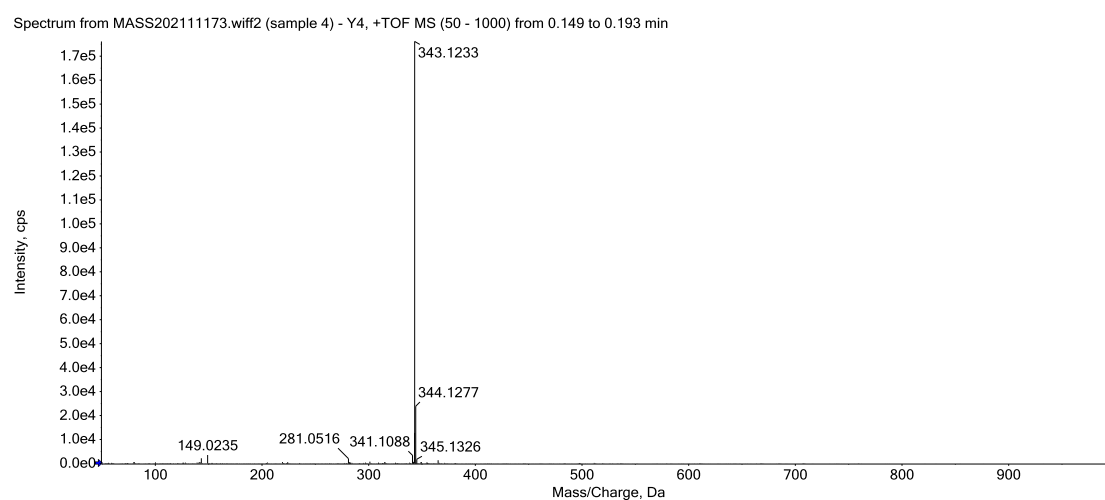

Spectrum from MASS202111173.wiff2 (sample 4) - Y4, +TOF MS (50 - 1000) from 0.149 to 0.193 min

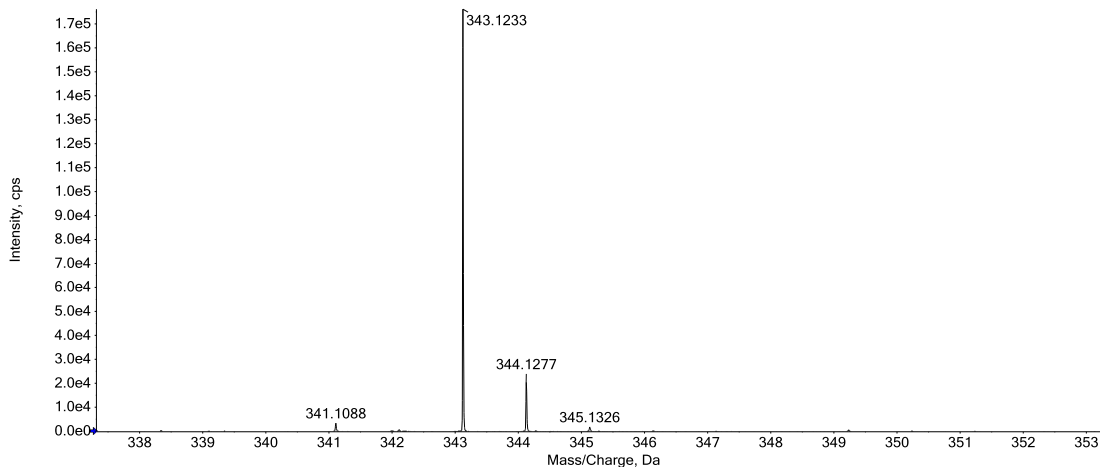

| Hit | Formula    | m/z      | RDB  | ppm  | MS Rank | MSMS ppm | MSMS Rank | Found |
|-----|------------|----------|------|------|---------|----------|-----------|-------|
| 1   | C22H15FN2O | 343.1241 | 16.0 | -2.4 | 1       |          |           | NA/NA |

## HR-MS spectrum of 7p

Spectrum from MASS202111173.wiff2 (sample 10) - Y10, +TOF MS (50 - 1000) from 0.149 to 0.193 min

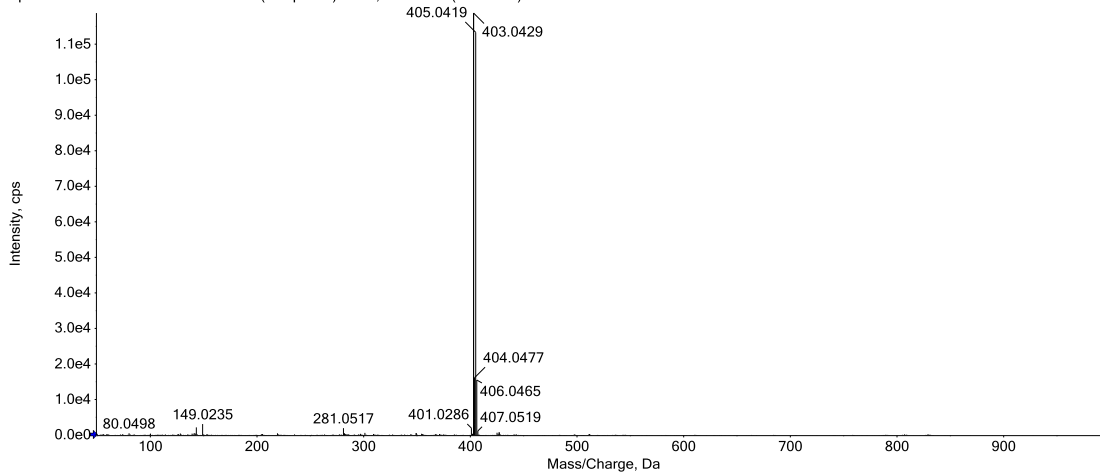

Spectrum from MASS202111173.wiff2 (sample 10) - Y10, +TOF MS (50 - 1000) from 0.149 to 0.193 min

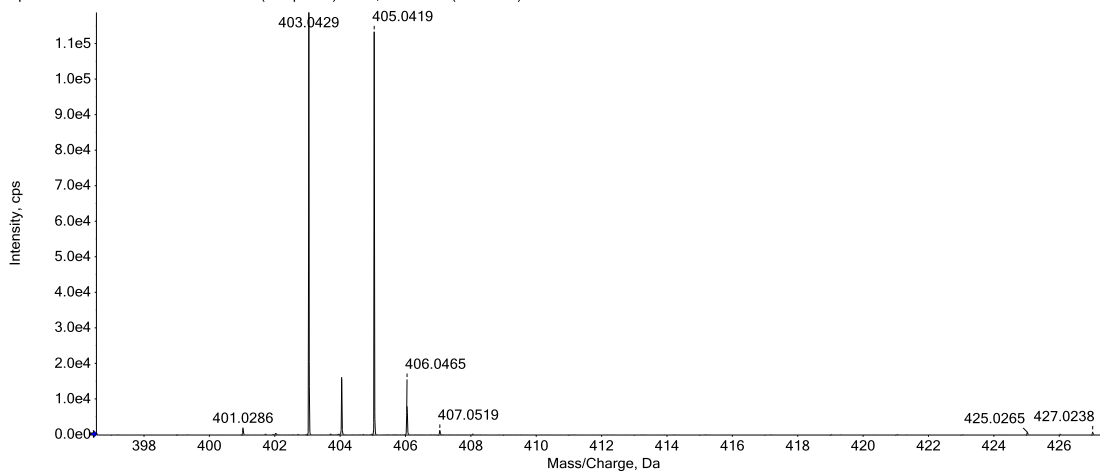

Spectrum from MASS202111173.wiff2 (sample 10) - Y10, +TOF MS (50 - 1000) from 0.149 to 0.193 min

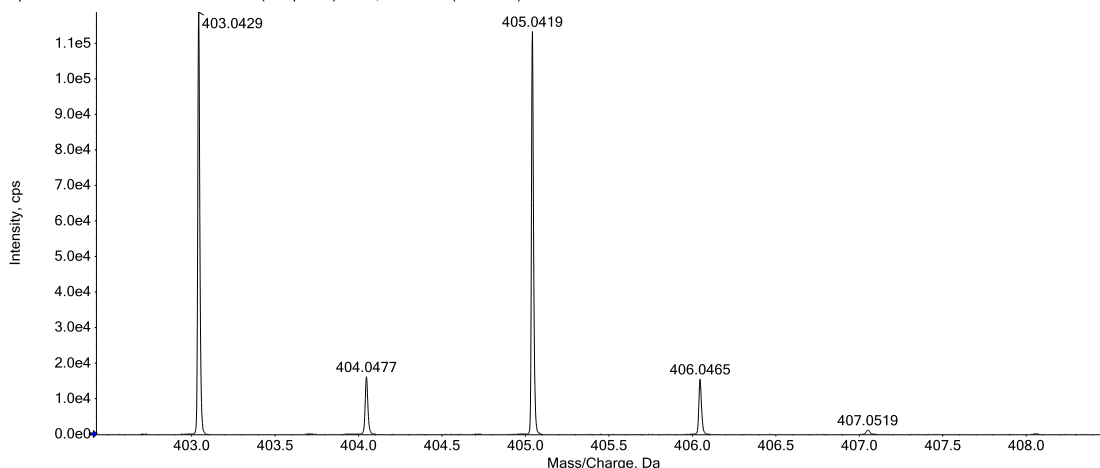

| Hit | Formula     | m/z      | RDB  | ppm  | MS Rank | MSMS ppm | MSMS Rank | Found |
|-----|-------------|----------|------|------|---------|----------|-----------|-------|
| 1   | C22H15BrN2O | 403.0441 | 16.0 | -2.9 | 1       |          |           | NA/NA |

## HR-MS spectrum of 7q

Spectrum from MASS202111173.wiff2 (sample 12) - Y12, +TOF MS (50 - 1000) from 0.149 to 0.193 min

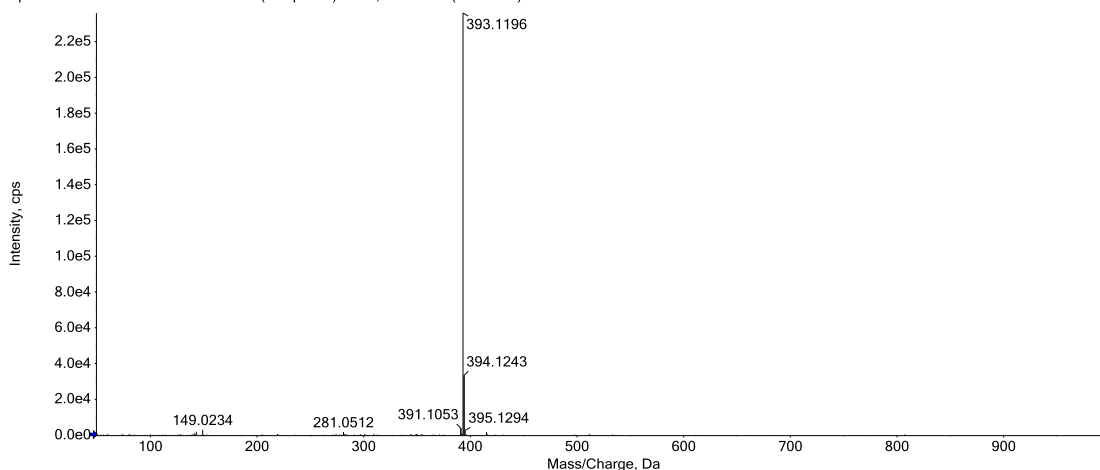

Spectrum from MASS202111173.wiff2 (sample 12) - Y12, +TOF MS (50 - 1000) from 0.149 to 0.193 min

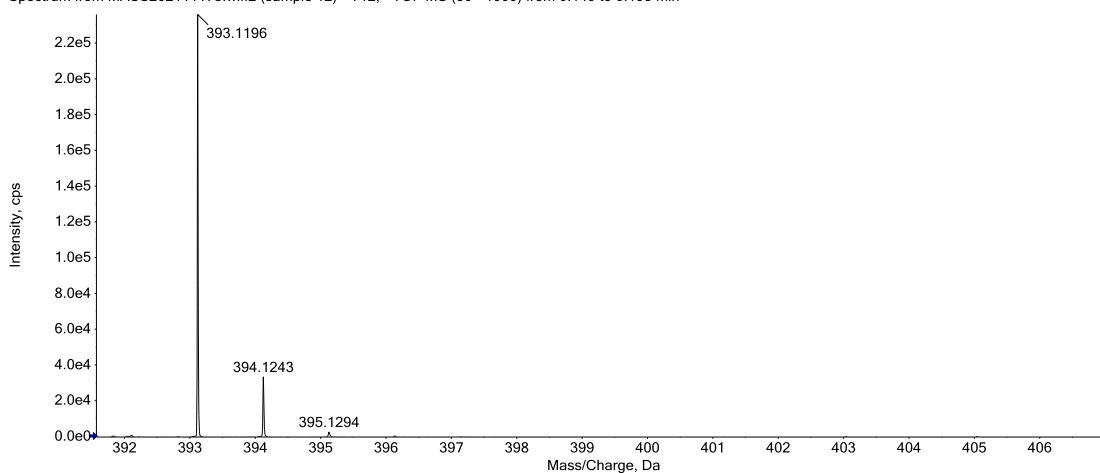

| Hit | Formula     | m/z      | RDB  | ppm  | MS Rank | MSMS ppm | MSMS Rank | Found |
|-----|-------------|----------|------|------|---------|----------|-----------|-------|
| 1   | C23H15F3N2O | 393.1209 | 16.0 | -3.4 | 1       |          |           | NA/NA |

HR-MS spectrum of 7r

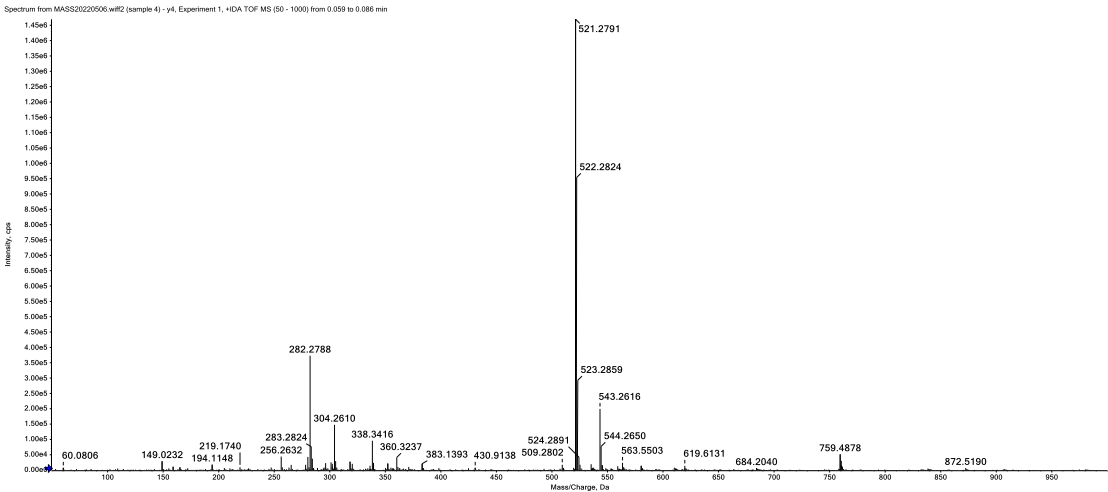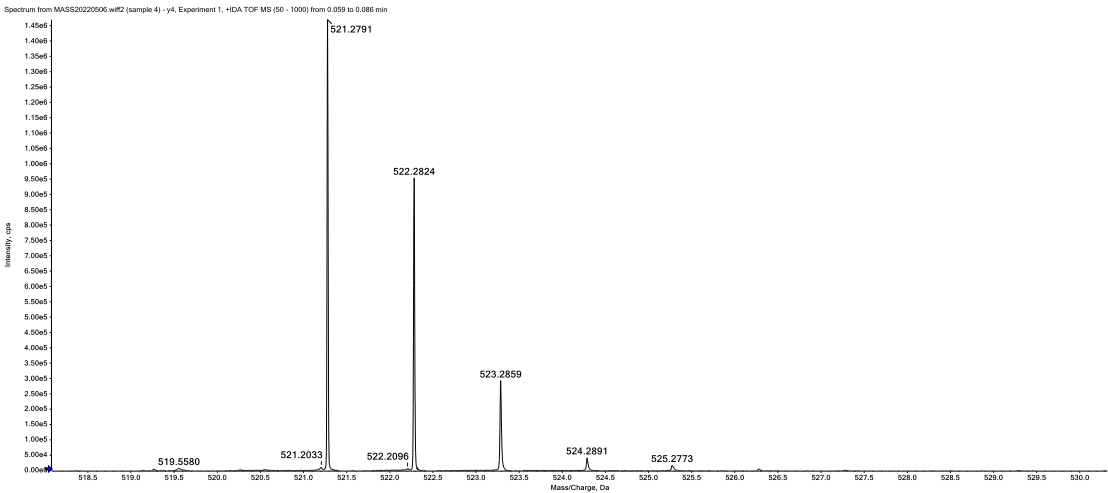

| Hit | Formula    | m/z       | RDB   | ppm   | MS Rank | MSMS ppm | MSMS Rank | Found |
|-----|------------|-----------|-------|-------|---------|----------|-----------|-------|
| 1   | C34H36N2O3 | 521. 2799 | 18. 0 | -1. 5 | 1       |          |           | NA/NA |

HR-MS spectrum of 7s

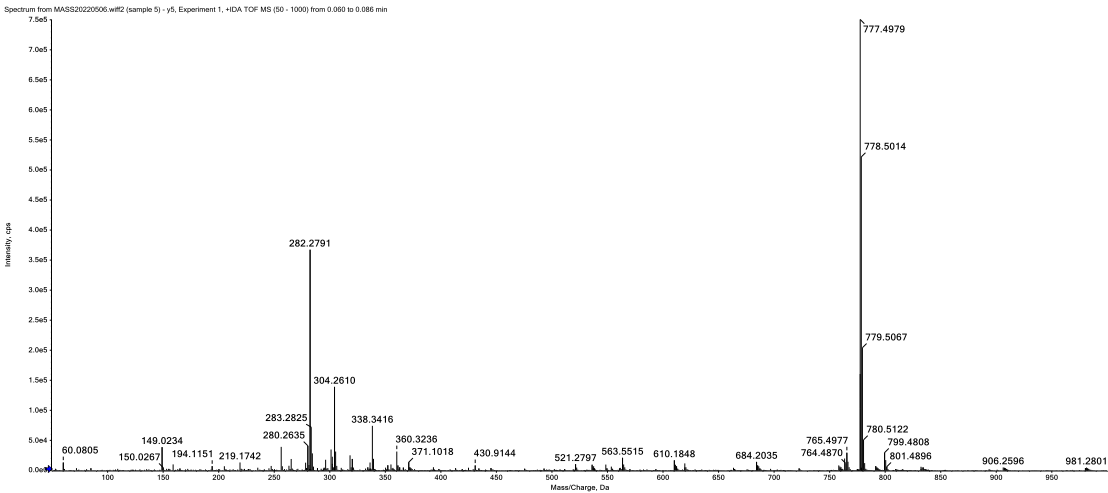

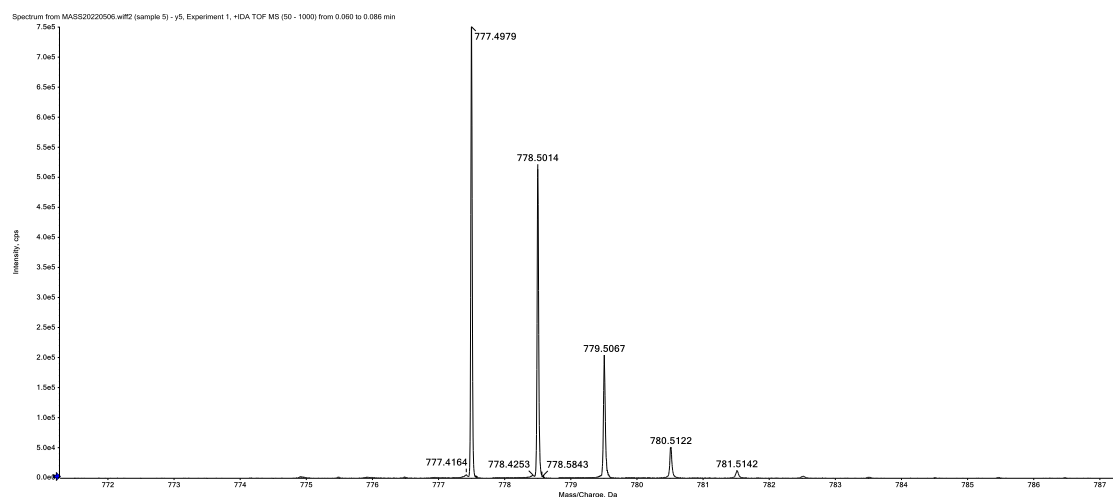

| Hit | Formula    | m/z      | RDB  | ppm  | MS Rank | MSMS ppm | MSMS Rank | Found |
|-----|------------|----------|------|------|---------|----------|-----------|-------|
| 1   | C53H64N2O3 | 777.4990 | 23.0 | -1.4 | 1       |          |           | NA/NA |

## HR-MS spectrum of 7t

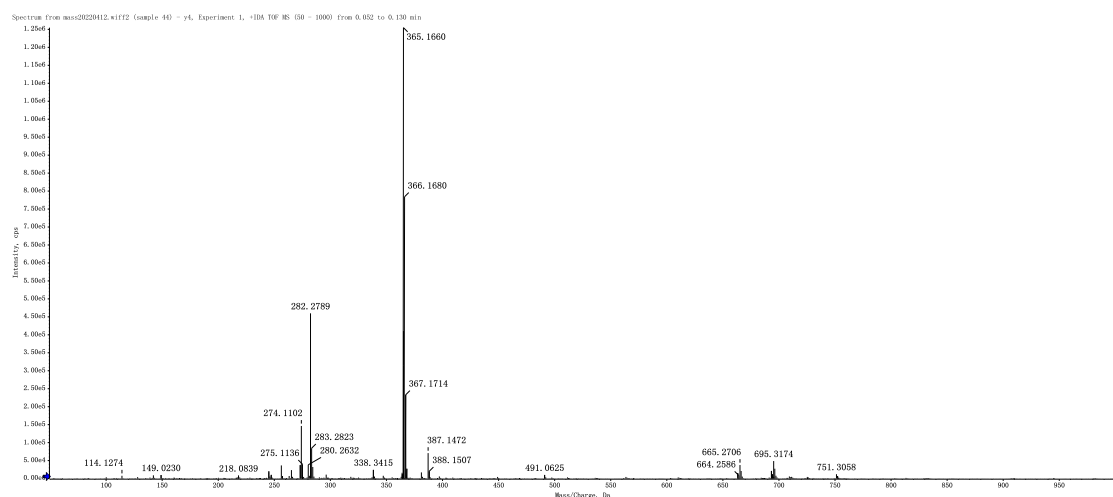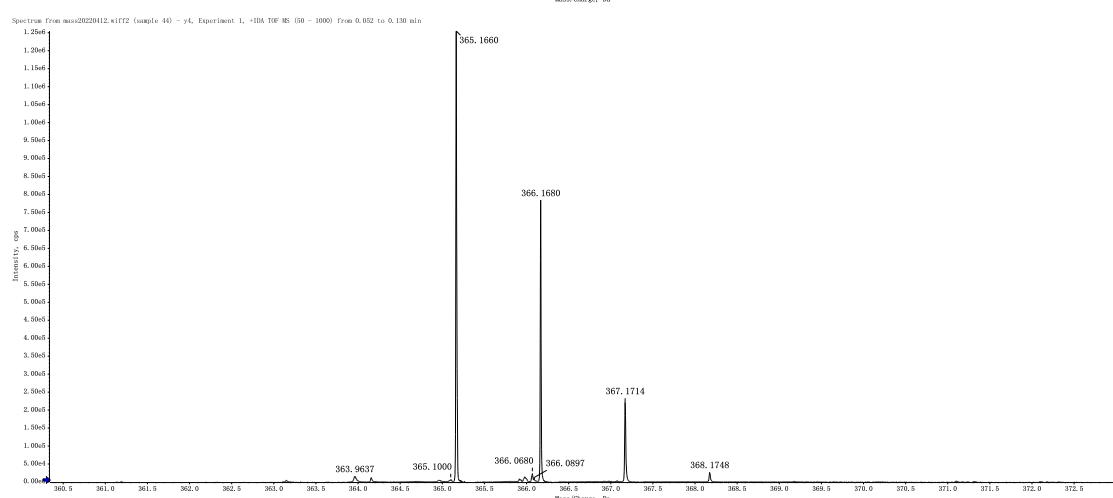

| Hit | Formula   | m/z      | RDB  | ppm | MS Rank | MSMS ppm | MSMS Rank | Found |
|-----|-----------|----------|------|-----|---------|----------|-----------|-------|
| 1   | C25H20N2O | 365.1648 | 17.0 | 3.2 | 1       |          |           | NA/NA |

HR-MS spectrum of 7u

Spectrum from MASS202111173.wiff2 (sample 16) - Y16, +TOF MS (50 - 1000) from 0.149 to 0.193 min

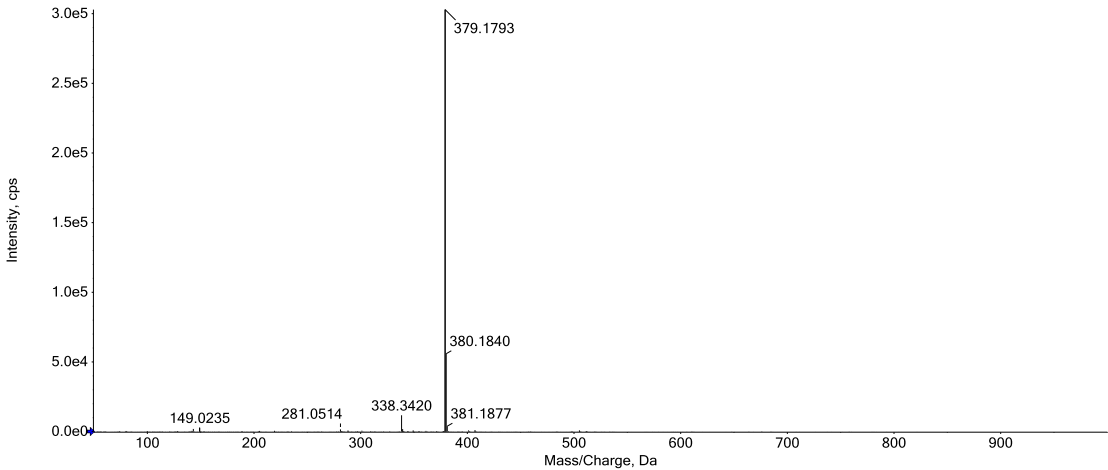

Spectrum from MASS202111173.wiff2 (sample 16) - Y16, +TOF MS (50 - 1000) from 0.149 to 0.193 min

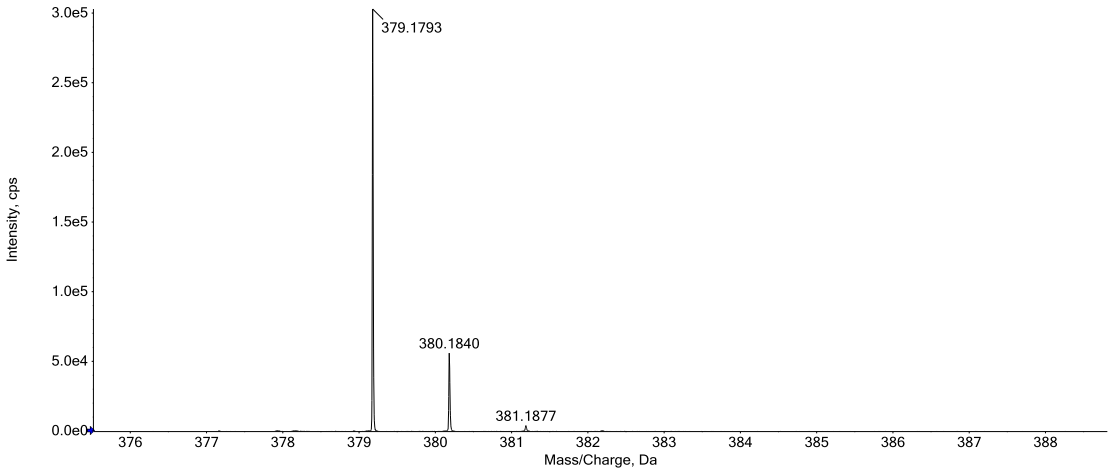

| Hit | Formula   | m/z      | RDB  | ppm  | MS Rank | MSMS ppm | MSMS Rank | Found |
|-----|-----------|----------|------|------|---------|----------|-----------|-------|
| 1   | C26H22N2O | 379.1805 | 17.0 | -3.1 | 1       |          |           | NA/NA |

HR-MS spectrum of 8

Spectrum from mass20220412.wiff2 (sample 45) - y5, Experiment 1, +IDA TOF MS (50 - 1000) from 0.631 to 0.130 min

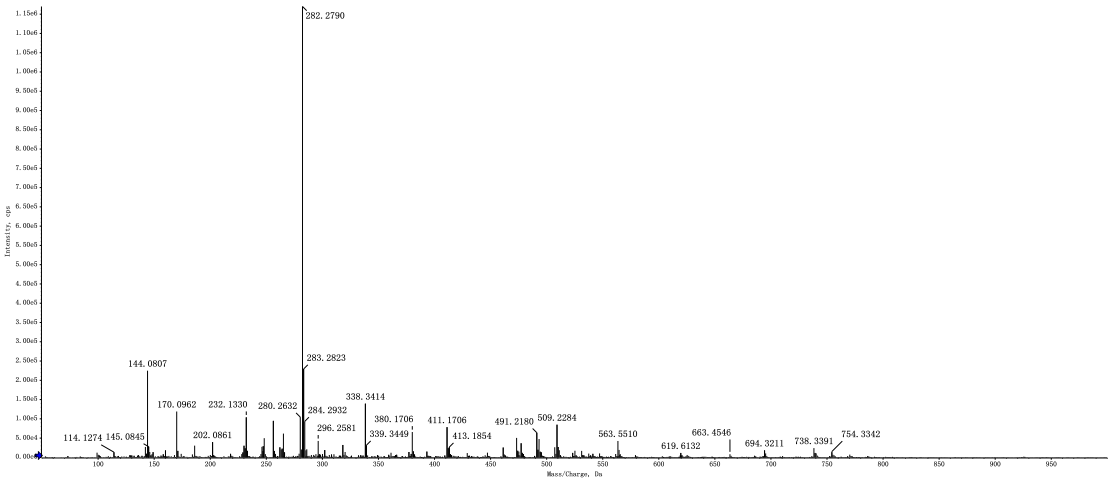

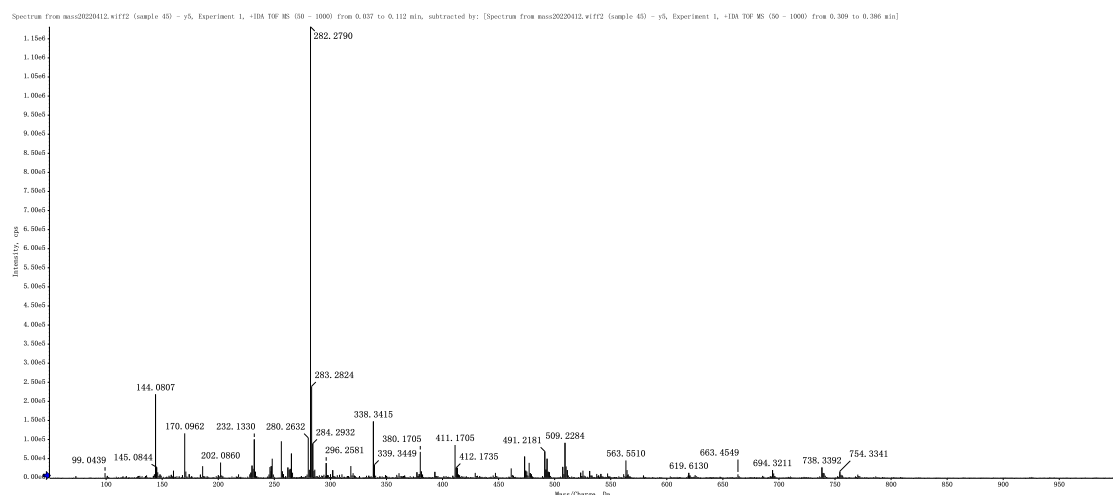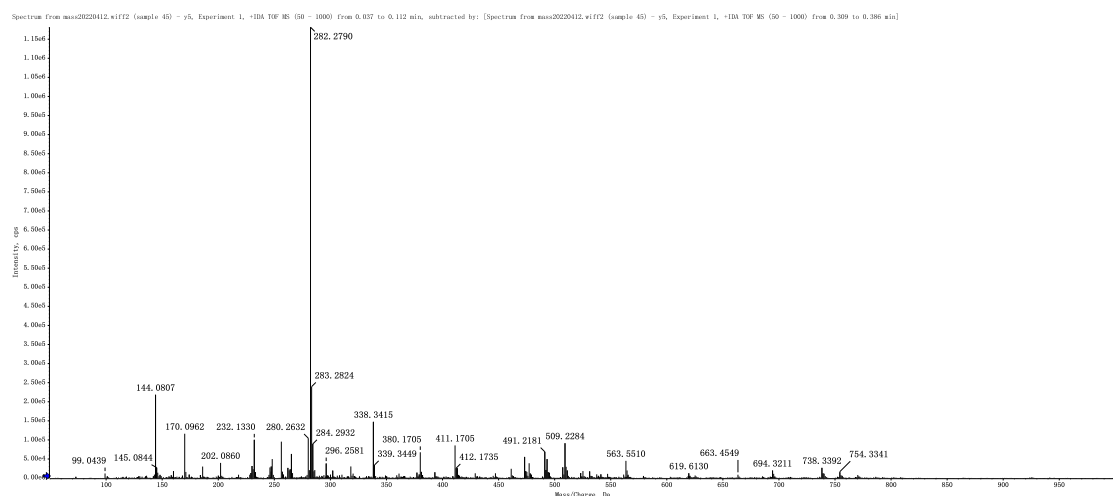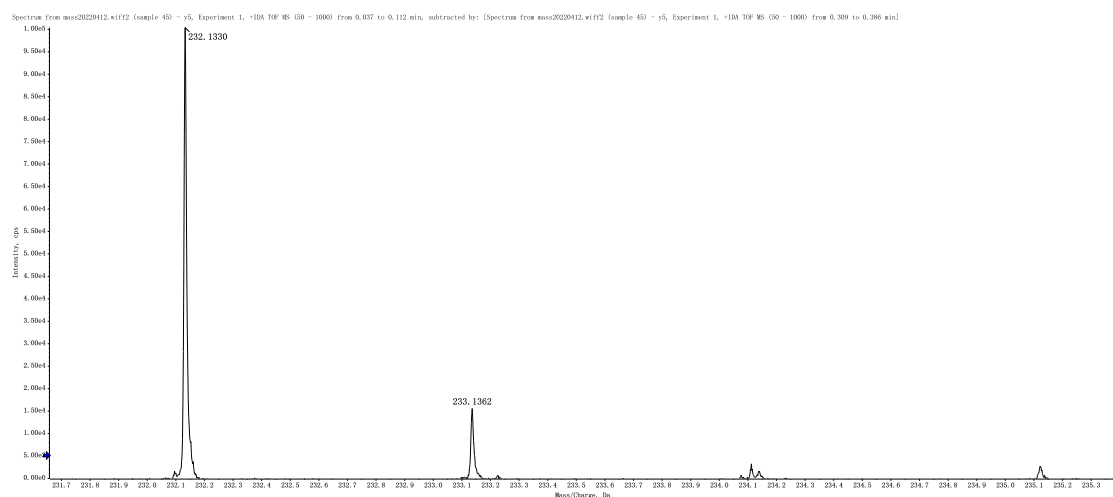

| Hit | Formula   | m/z      | RDB | ppm  | MS Rank | MSMS ppm | MSMS Rank | Found |
|-----|-----------|----------|-----|------|---------|----------|-----------|-------|
| 1   | C14H17NO2 | 232.1332 | 7.0 | -0.9 | 1       |          |           | NA/NA |



HR-MS spectrum of 9

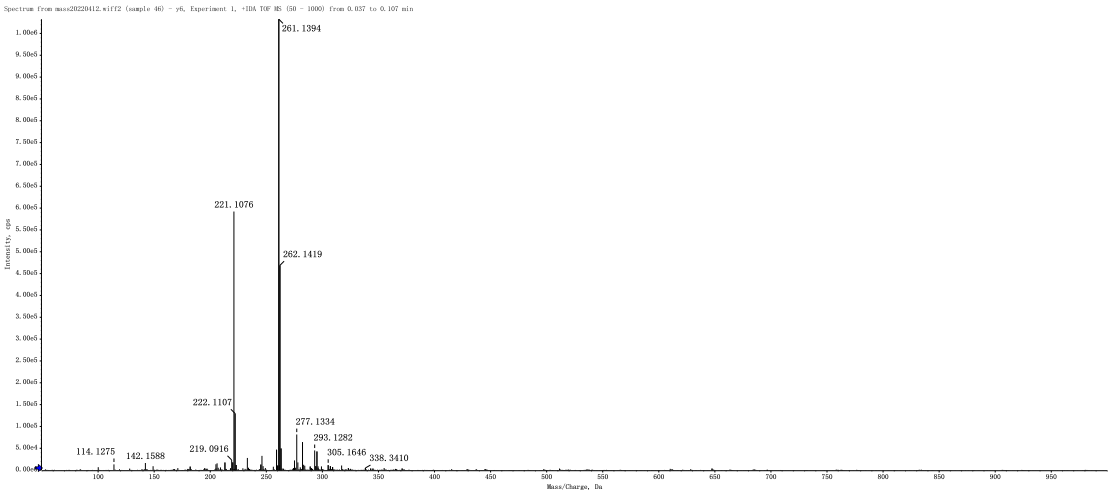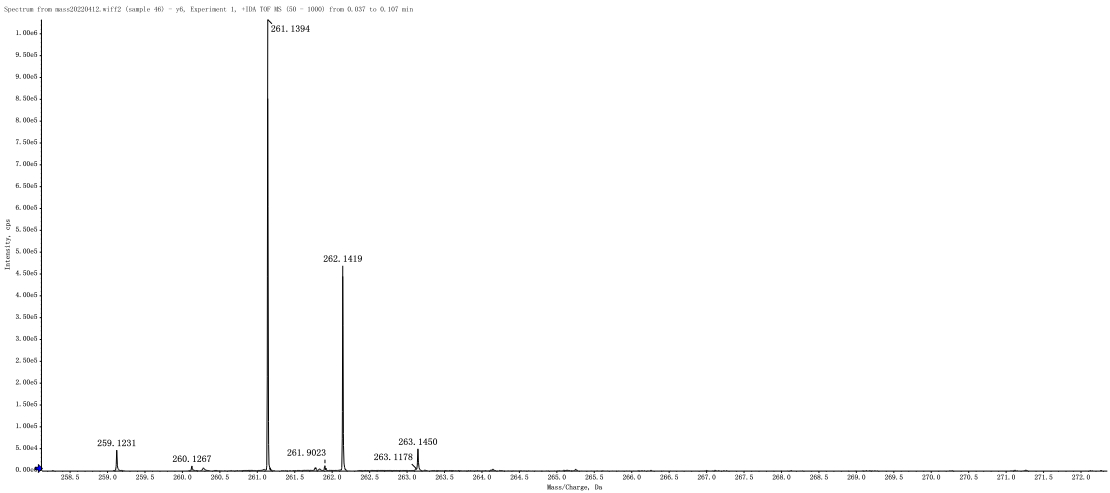

| Hit | Formula  | m/z      | RDB  | ppm | MS Rank | MSMS ppm | MSMS Rank | Found |
|-----|----------|----------|------|-----|---------|----------|-----------|-------|
| 1   | C18H16N2 | 261.1386 | 12.0 | 3.0 | 1       |          |           | NA/NA |

HR-MS spectrum of 10

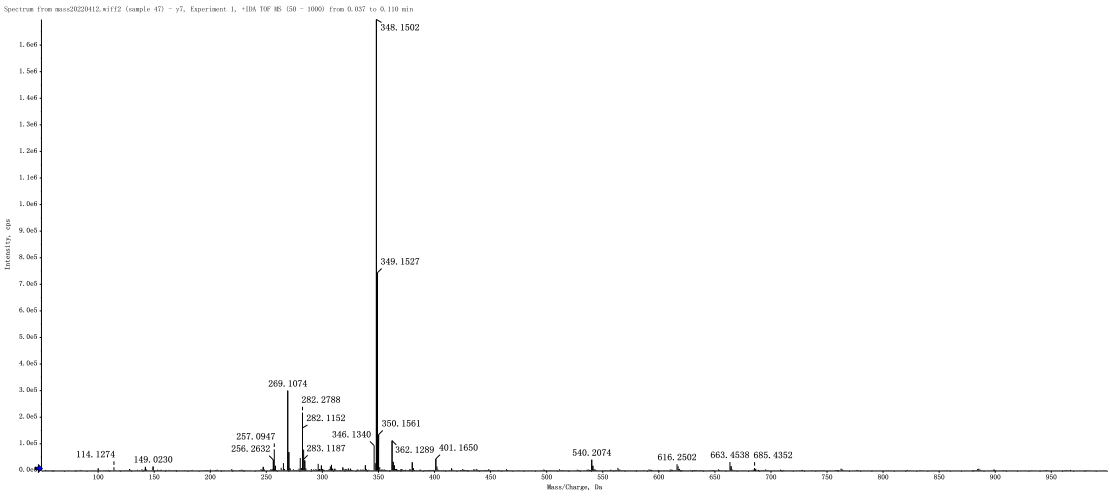

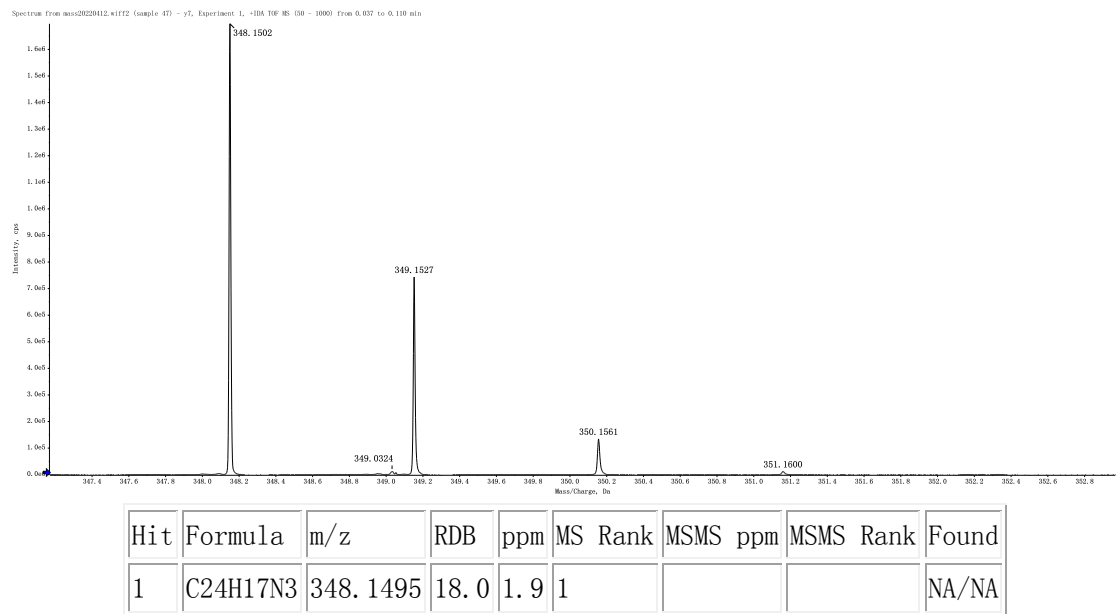

## HR-MS spectrum of 11

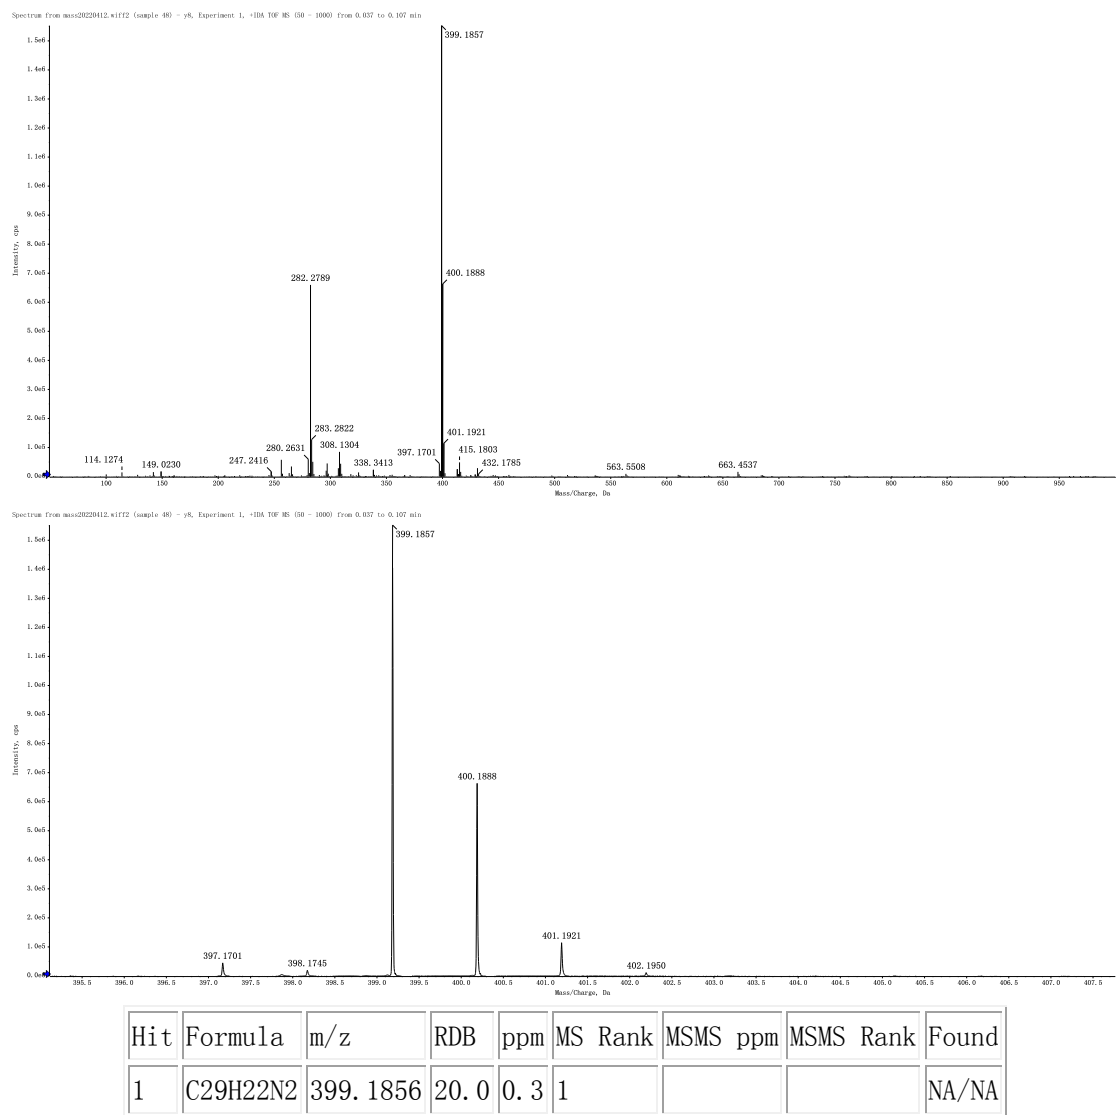

HR-MS spectrum of 12

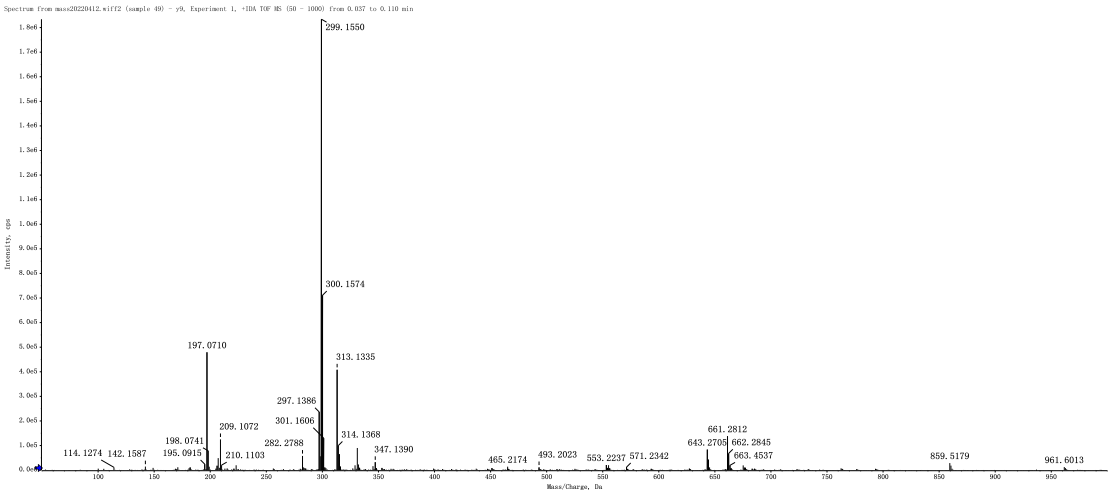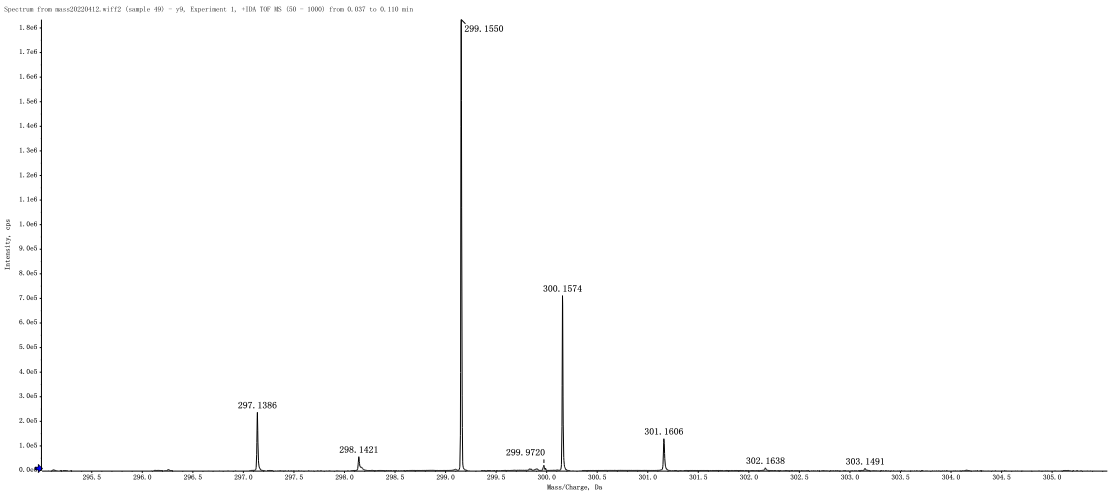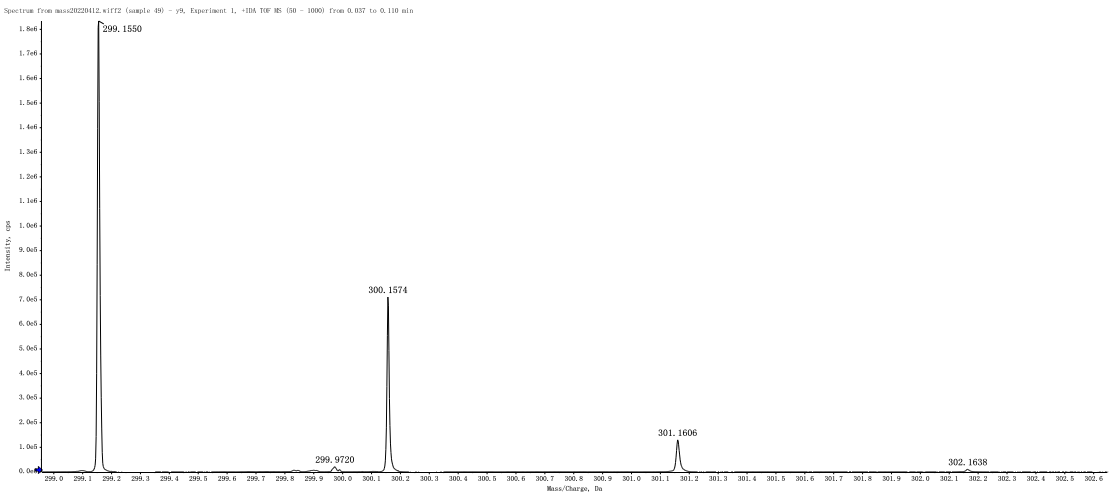

| Hit | Formula  | m/z      | RDB  | ppm | MS Rank | MSMS ppm | MSMS Rank | Found |
|-----|----------|----------|------|-----|---------|----------|-----------|-------|
| 1   | C21H18N2 | 299.1543 | 14.0 | 2.4 | 1       |          |           | NA/NA |

HR-MS spectrum of 13

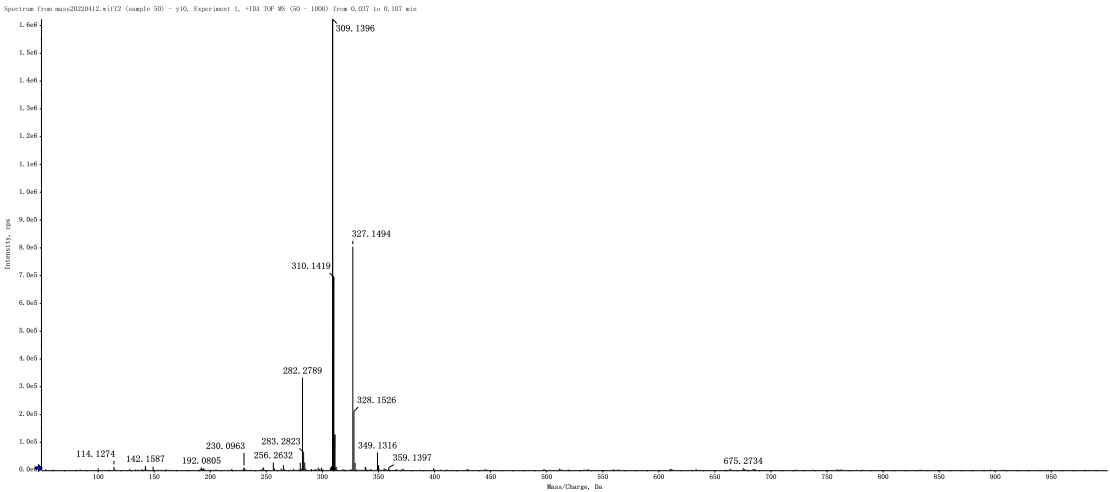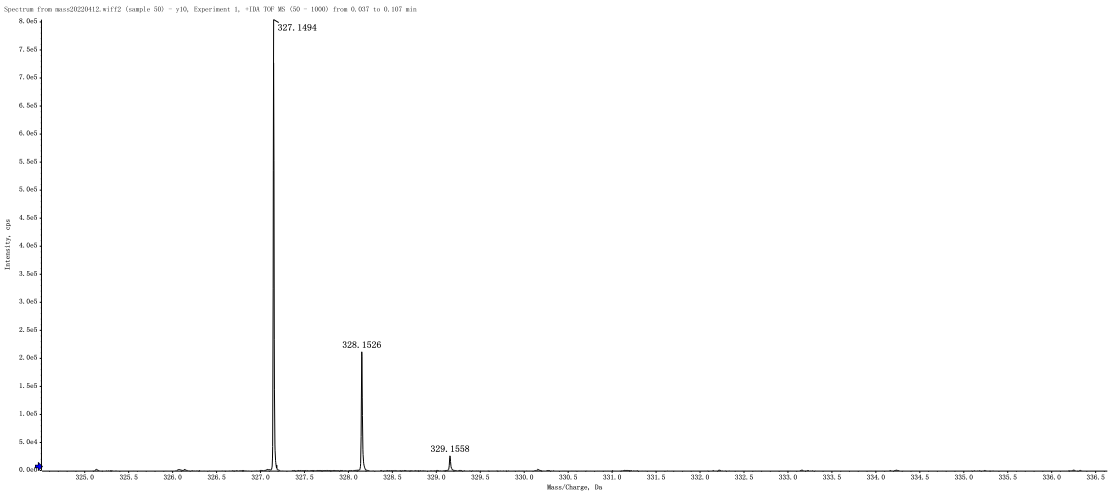

| Hit | Formula   | m/z       | RDB   | ppm  | MS Rank | MSMS ppm | MSMS Rank | Found |
|-----|-----------|-----------|-------|------|---------|----------|-----------|-------|
| 1   | C22H18N2O | 327. 1492 | 15. 0 | 0. 6 | 1       |          |           | NA/NA |

HR-MS spectrum of 14

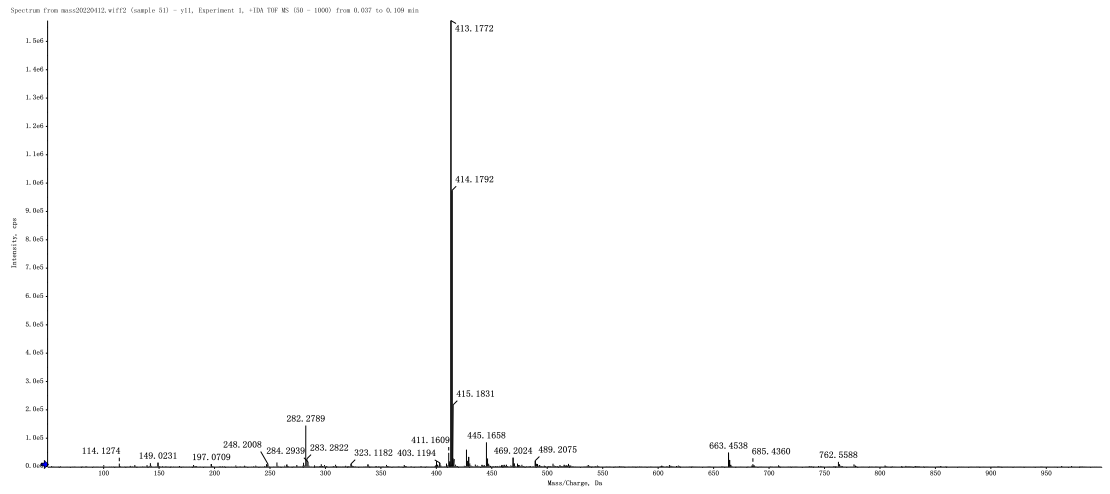

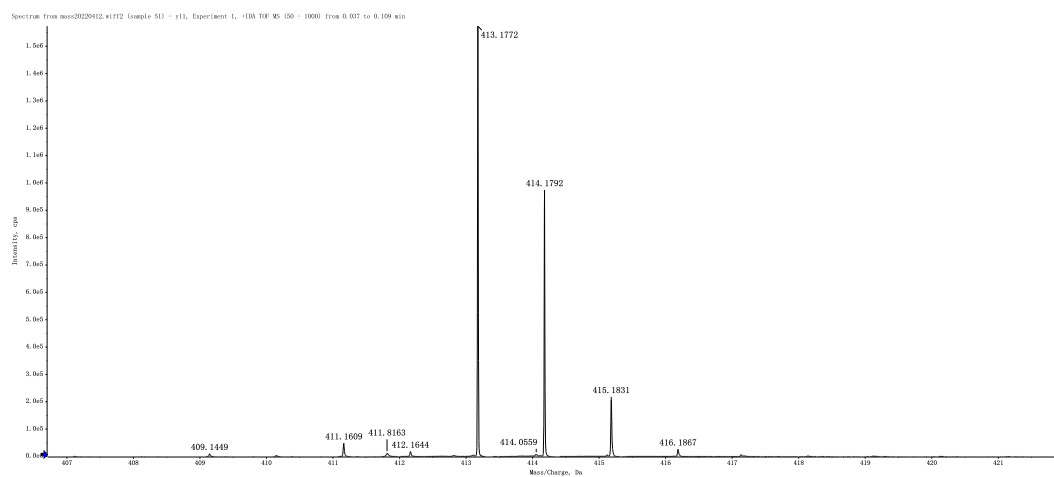

| Hit | Formula  | m/z      | RDB  | ppm | MS Rank | MSMS ppm | MSMS Rank | Found |
|-----|----------|----------|------|-----|---------|----------|-----------|-------|
| 1   | C28H20N4 | 413.1761 | 21.0 | 2.7 | 1       |          |           | NA/NA |

#### IV. Supplementary References

1. (a) Hu, X., Shao, Y., Xie, H., Chen, X., Chen, F., Ke, Z., Jiang, H. & Zeng, W. Direct Carbon–Carbon  $\sigma$  Bond Amination of Unstrained Arylalkylketones. *ACS Catal.* **10**, 8402 – 8408 (2020); (b) Yang, P. & Bao, Y.-S. Palladium nanoparticles supported on organofunctionalized kaolin as an efficient heterogeneous catalyst for directed C–H functionalization of arylpyrazoles. *RSC Adv.* **7**, 53878–53886 (2017).
2. Zhu, C., Pinkert, T., Greffes, S. & Glorius, F. One-Pot C–H Formylation Enabled by Relay Catalysis of Manganese(I) and Iron(III). *ACS Catal.* **8**, 10036 – 10042 (2018).
3. Estopiñá-Durán, S., Mclean, E., Donnelly, L., Hockin, B. & Taylor, J. Arylboronic Acid Catalyzed C – Alkylation and Allylation Reactions Using Benzylic Alcohols. *Org. Lett.* **22**, 7547 – 7551 (2020).
4. Bai, J.-F., Yasumoto, K., Kano, T. & Maruoka, K. Asymmetric Synthesis of Chiral 1,4-Enynes through Organocatalytic Alkenylation of Propargyl Alcohols with Trialkenylboroxines. *Angew. Chem., Int. Ed.* **58**, 8898 – 8901 (2019).
5. Yang, B., Li, S.-J., Wang, Y., Lan, Y. & Zhu, S. Hydrogen radical-shuttle (HRS)-enabled photoredox synthesis of indanones via decarboxylative annulation. *Nat. Commun.* **12**, 5257 – 5268 (2021).
6. Tiwari, V., Kamal, N. & Kapur, M. Ruthenium-Catalyzed Heteroatom-Directed Regioselective C–H Arylation of Indoles Using a Removable Tether. *Org. Lett.* **17**, 1766 – 1769 (2015).
7. Li, J., Zhang, Z., Ma, W., Tang, M., Wang, D. & Zou, L.-H. Mild Cobalt (III)-Catalyzed C–H Hydroarylation of Conjugated C=C/C=O Bonds. *Adv. Synth. Catal.* **359**, 1717 – 1724 (2017).
8. Yang, C., Liu, Z., Hu, X., Xie, H., Jiang, H. & Zeng, W. Rh(III)-Catalyzed  $\text{Csp}^2$  –  $\text{Csp}^3$  bond alkoxylation of  $\alpha$ -indolyl alcohols via C – C  $\sigma$  bond cleavage. *Org. Chem. Front.*, **8**, 2949 – 2954 (2021).
9. Liu, Y., Xu, W. & Wang, X. Gold(I)-Catalyzed Tandem Cyclization Approach to Tetracyclic Indolines. *Org. Lett.* **12**, 1448 – 1451 (2010).
10. Lee, H., Kim, S. & Kim, J. Facile One-Pot Synthesis of Cinnamamides from Aromatic Aldehydes and Acetonitrile with  $\text{Me}_3\text{SiOK}$ . *Bull. Kor. Chem. Soc.* **32**, 1748 – 1750 (2011).
11. Wen, X.-M., Tao, L., Xiang, Y.-Z., Fang, Y.-G. & Yu, X.-Q. A facile synthesis of trans-alkenes in micellar media. *ARKIVOC* **13**, 169 – 174 (2005).
12. Kim, Y., Park, S. & Kim, J. Cobalt-Catalyzed Direct  $\text{C}(\text{sp}^2)$ –H Alkylation with Unactivated Alkenes. *Eur. J. Org. Chem.* **2020**, 4026 – 4030 (2020).
13. Shintani, R., Fujie, R., Takeda, M. & Nozaki, K. Silylative Cyclopropanation of Allyl Phosphates with Silylboronate. *Angew. Chem., Int. Ed.* **126**, 6664 – 6667 (2014).
14. Annes, S., Vairaprakash, P. & Ramesh, S. TfOH mediated intermolecular electrocycloization for the synthesis of pyrazolines and its application in alkaloid synthesis. *RSC Adv.* **8**, 30071 – 30075 (2018).
15. Gaussian 09, Revision D.01; Frisch, M. J.; Trucks, G. W.; Schlegel, H. B.; Scuseria, G. E.; Robb, M. A.; Cheeseman, J. R.; Scalmani, G.; Barone, V.; Mennucci, B.; Petersson, G. A.; Nakatsuji, H.; Caricato, M.; Li, X.; Hratchian, H. P.; Izmaylov, A. F.; Bloino, J.; Zheng, G.; Sonnenberg, J. L.; Hada, M.; Ehara, M.; Toyota, K.; Fukuda, R.; Hasegawa, J.; Ishida, M.; Nakajima, T.; Honda, Y.; Kitao, O.; Nakai, H.; Vreven, T.; Montgomery, J. A., Jr.; Peralta, J. E.; Ogliaro, F.; Bearpark, M.; Heyd, J. J.; Brothers, E.; Kudin, K. N.; Staroverov, V. N.; Kobayashi, R.; Normand, J.; Raghavachari, K.; Rendell, A.; Burant, J. C.; Iyengar, S. S.; Tomasi, J.; Cossi, M.; Rega, N.; Millam, M. J.; Klene, M.; Knox, J. E.; Cross, J. B.; Bakken, V.; Adamo, C.; Jaramillo, J.; Gomperts, R.; Stratmann, R. E.; Yazyev, O.; Austin, A. J.; Cammi, R.; Pomelli, C.; Ochterski, J. W.; Martin, R. L.; Morokuma, K.; Zakrzewski, V. G.; Voth, G. A.; Salvador, P.; Dannenberg, J. J.; Dapprich, S.; Daniels, A. D.; Farkas, Ö.; Foresman, J. B.; Ortiz, J. V.; Cioslowski, J.; Fox, D. J.: Gaussian, Inc., Wallingford CT, **2009**.
16. Zhao, Y. & Truhlar, D. G. Density functionals with broad applicability in chemistry. *Acc. Chem. Res.* **41**, 157 – 167 (2008).

17. Zhao, Y. & Truhlar, D. G. The M06 suite of density functionals for main group thermochemistry, thermochemical kinetics, noncovalent interactions, excited states, and transition elements: two new functionals and systematic testing of four M06-class functionals and 12 other functionals. *Theor. Chem. Acc.* **120**, 215 – 241 (2008).
18. Wang, C., Wang, J., Cai, Q., Li, Z., Zhao, H.-K. & Luo, R., Exploring accurate Poisson–Boltzmann methods for biomolecular simulations. *Comput. Theor. Chem.* **1024**, 34 – 44 (2013).
19. Weigend, F. & Ahlrichs, R. Balanced basis sets of split valence, triple zeta valence and quadruple zeta valence quality for H to Rn: Design and assessment of accuracy. *Phys. Chem. Chem. Phys.* **7**, 3297 – 3305 (2005).
20. Fukui, K. The path of chemical reactions-the IRC approach. *Acc. Chem. Res.* **14**, 363 – 368 (1981).
21. Weigend, F. Accurate Coulomb-fitting basis sets for H to Rn. *Phys. Chem. Chem. Phys.* **8**, 1057 – 1065 (2006).
22. Marenich, A. V., Cramer, C. J. & Truhlar, D. G. Universal Solvation Model Based on Solute Electron Density and on a Continuum Model of the Solvent Defined by the Bulk Dielectric Constant and Atomic Surface Tensions. *J. Phys. Chem. B.* **113**, 6378 – 6396 (2009).
23. Besora, M., Vidossich, P., Lledós, A., Ujaque, G. & Maseras, F. Calculation of Reaction Free Energies in Solution: A Comparison of Current Approaches. *J. Phys. Chem. A.* **122**, 1392 – 1399 (2018).
24. Lu, T. & Chen, F. Multiwfn: a multifunctional wavefunction analyzer. *J. Comput. Chem.* **33**, 580 – 592 (2012).
